# Supplementary material for: Cell-specific and shared enhancers control a high-density multi-gene locus active in mammary and salivary glands
Source: Research Square preprint supplement (doi:10.21203/rs.3.rs-2533579/v1), 2023-02-07
Supplement: Supplementary file 1 [file 22f292f7de4e124197589e52.xlsx]

## Sheet: SG_sorted3_Odam-allGenes-withFC
Gene	WT_SG_rep1	WT_SG_rep2	WT_SG_rep3	Odam_SG_rep1	Odam_SG_rep2	Odam_SG_rep3	log2FoldChange	pvalue	padj	WT_mean	Odam_mean
0610005C13Rik	11.1862	5.92353	7.72533	7.0727	11.7699	3.42166	-0.277453	0.752614	0.999927	8.27836	7.42143
0610007P14Rik	166.195	199.031	176.579	193.615	157.289	168.517	-0.0637922	0.772379	0.999927	180.602	173.14
0610009B22Rik	222.127	240.495	229.553	217.485	212.929	218.131	-0.096012	0.632129	0.999927	230.725	216.182
0610009L18Rik	20.7744	15.4012	18.7615	16.7977	17.1199	23.9516	0.0626666	0.913713	0.999927	18.3124	19.2897
0610009O20Rik	464.229	445.449	419.375	427.014	408.738	422.575	-0.0760146	0.627143	0.999927	443.018	419.442
0610010F05Rik	468.224	539.041	561.742	682.515	567.097	533.779	0.184662	0.233912	0.999927	523.002	594.464
0610010K14Rik	112.661	86.4835	89.3931	90.1769	104.859	97.5173	0.0145163	0.958541	0.999927	96.1793	97.5179
0610011F06Rik	246.896	287.883	218.516	255.501	227.909	263.468	-0.0089172	0.962384	0.999927	251.099	248.959
0610012G03Rik	216.534	268.928	214.102	245.776	209.719	242.938	-0.00289892	0.988515	0.999927	233.188	232.811
0610030E20Rik	379.533	345.934	429.307	362.476	461.167	383.226	0.066476	0.697327	0.999927	384.925	402.29
0610037L13Rik	189.367	216.801	214.102	263.458	227.909	208.721	0.179147	0.373567	0.999927	206.757	233.363
0610038B21Rik	1.59803	3.55412	2.20724	4.42044	0	0	-1.33908	0.503371	NA	2.45313	1.47348
0610039H22Rik	5.59312	4.73882	5.51809	7.95678	9.62994	6.84332	0.611603	0.494081	0.999927	5.28334	8.14335
0610040B10Rik	11.9852	11.8471	27.5905	17.6817	18.1899	17.9637	0.191666	0.757585	0.999927	17.1409	17.9451
0610040F04Rik	3.99508	2.36941	4.41447	1.76817	3.20998	2.56625	-0.519084	0.716753	NA	3.59299	2.5148
0610040J01Rik	763.86	787.829	667.689	900.001	726.526	755.332	0.108958	0.490528	0.999927	739.793	793.953
0610043K17Rik	39.1518	35.5412	45.2483	36.2476	47.0797	57.3128	0.227614	0.584005	0.999927	39.9804	46.88
1110001J03Rik	149.416	207.323	123.605	116.699	111.279	167.661	-0.284492	0.253409	0.999927	160.115	131.88
1110002L01Rik	26.3675	29.6176	26.4868	13.2613	13.9099	17.1083	-0.900563	0.118164	0.999927	27.4907	14.7598
1110004E09Rik	147.019	162.305	150.092	229.863	146.589	126.601	0.125294	0.641786	0.999927	153.139	167.684
1110004F10Rik	572.895	646.849	571.674	627.702	600.266	603.923	0.0309272	0.826125	0.999927	597.139	610.63
1110006O24Rik	8.78918	1.18471	3.31085	5.30452	2.13999	7.69874	0.102629	0.930531	NA	4.42825	5.04775
1110007C09Rik	173.387	178.891	116.984	189.195	133.749	212.998	0.199909	0.381464	0.999927	156.42	178.647
1110008F13Rik	202.95	202.585	162.232	271.415	191.529	211.288	0.251576	0.264653	0.999927	189.256	224.744
1110008L16Rik	213.337	223.909	258.247	272.299	261.078	187.336	0.0421261	0.829422	0.999927	231.831	240.238
1110008P14Rik	314.014	459.666	286.941	328.88	320.998	394.346	-0.0110869	0.952647	0.999927	353.54	348.075
1110012L19Rik	147.818	140.98	123.605	144.106	121.979	133.445	-0.0488858	0.839165	0.999927	137.468	133.177
1110019D14Rik	84.6958	88.8529	140.16	106.09	90.9495	88.9632	-0.0932517	0.735578	0.999927	104.569	95.3344
1110020A21Rik	12.7843	14.2165	19.8651	8.84087	19.2599	23.0962	0.136469	0.839307	0.999927	15.622	17.0657
1110028F11Rik	24.7695	11.8471	30.9013	31.8271	35.3098	33.3612	0.602692	0.238765	0.999927	22.506	33.4994
1110032A03Rik	359.557	381.475	432.618	312.967	398.038	352.431	-0.138242	0.419074	0.999927	391.217	354.479
1110032F04Rik	3.19607	0	4.41447	0	1.06999	2.56625	-0.696084	0.705677	NA	2.53685	1.21208
1110034G24Rik	56.7302	46.2035	49.6628	44.2044	43.8697	36.7829	-0.301353	0.415379	0.999927	50.8655	41.619
1110037F02Rik	1096.25	1181.15	1332.07	1265.13	1336.42	1129.15	0.0507871	0.668976	0.999927	1203.16	1243.57
1110038B12Rik	31.9607	30.8023	26.4868	58.3497	40.6598	46.1924	0.698002	0.0767478	0.999927	29.7499	48.4006
1110038F14Rik	112.661	111.362	99.3256	122.888	106.999	115.481	0.095247	0.709228	0.999927	107.783	115.123
1110046J04Rik	13.5833	4.73882	3.31085	7.95678	6.41996	10.265	0.299901	0.746722	0.999927	7.21099	8.21391
1110051M20Rik	47.941	55.6812	52.9737	47.7407	48.1497	43.6262	-0.161796	0.651414	0.999927	52.1986	46.5055
1110058D11Rik	7.99017	4.73882	14.347	4.42044	7.48996	7.69874	-0.356687	0.699171	0.999927	9.02534	6.53638
1110059E24Rik	389.121	490.468	464.623	489.784	393.758	346.443	-0.146884	0.409052	0.999927	448.071	409.995
1110059G10Rik	122.25	143.349	157.817	160.02	128.399	137.722	0.010912	0.963916	0.999927	141.139	142.047
1110065P20Rik	12.7843	21.3247	2.20724	13.2613	1.06999	17.9637	0.0364657	0.967507	0.999927	12.1054	10.765
1190002F15Rik	4.7941	0	2.20724	0.884087	3.20998	10.265	0.711989	0.608269	NA	2.33378	4.78635
1190002N15Rik	141.426	154.012	144.574	120.236	125.189	92.3848	-0.395415	0.0968139	0.999927	146.671	112.603
1190007I07Rik	27.9656	42.6494	36.4194	40.668	36.3798	35.072	0.0681579	0.874785	0.999927	35.6781	37.3733
1200014J11Rik	497.787	456.112	549.602	597.643	562.817	494.43	0.139327	0.341037	0.999927	501.167	551.63
1300002E11Rik	139.828	105.439	173.268	127.309	142.309	144.565	0.00446167	0.9857	0.999927	139.512	138.061
1300017J02Rik	1.59803	1.18471	0	0	0	2.56625	-0.481515	0.825176	NA	0.92758	0.855415
1500004A13Rik	20.7744	18.9553	34.2122	16.7977	29.9598	28.2287	0.068059	0.89485	0.999927	24.6473	24.9954
1500009L16Rik	15.1813	15.4012	15.4507	11.4931	5.34997	13.6866	-0.628188	0.396074	0.999927	15.3444	10.1766
1500011B03Rik	73.5095	59.2353	72.8388	63.6543	67.4096	51.3249	-0.183842	0.570906	0.999927	68.5279	60.7963
1500011K16Rik	68.7154	108.993	57.3881	68.9588	68.4796	76.9874	-0.110116	0.732982	0.999927	78.3655	71.4753
1500012F01Rik	119.053	67.5282	124.709	157.367	113.419	107.782	0.281835	0.298997	0.999927	103.764	126.19
1500015A07Rik	37.5538	21.3247	41.9375	61.002	53.4997	45.337	0.670762	0.111738	0.999927	33.6053	53.2796
1500015L24Rik	0.799017	0	3.31085	2.65226	3.20998	2.56625	1.58391	0.356902	NA	1.36996	2.8095
1500015O10Rik	39.9508	73.4517	45.2483	40.668	52.4297	53.0357	-0.105552	0.790468	0.999927	52.8836	48.7111
1500026H17Rik	76.7056	86.4835	116.984	61.8861	98.4394	91.5294	-0.129383	0.69098	0.999927	93.3909	83.9516
1600002D24Rik	0	3.55412	1.10362	1.76817	3.20998	1.71083	0.607833	0.711016	NA	1.55258	2.22966
1600002H07Rik	47.142	58.0506	43.0411	56.5816	26.7498	41.9153	-0.229664	0.579579	0.999927	49.4112	41.7489
1600002K03Rik	83.8967	108.993	70.6316	106.975	58.8497	92.3848	-0.0304703	0.922564	0.999927	87.8404	86.0697
1600010M07Rik	2.39705	1.18471	1.10362	2.65226	5.34997	6.84332	1.67569	0.219462	NA	1.56179	4.94852
1600012H06Rik	535.341	556.812	554.016	601.179	515.737	448.238	-0.079206	0.603219	0.999927	548.723	521.718
1600014C10Rik	172.588	175.336	119.191	152.947	187.249	149.698	0.0778862	0.741063	0.999927	155.705	163.298
1600014C23Rik	3.19607	0	6.62171	0.884087	8.55995	2.56625	0.273781	0.85883	NA	3.27259	4.00343
1600020E01Rik	59.1272	65.1588	76.1497	54.8134	78.1095	55.602	-0.0889915	0.785654	0.999927	66.8119	62.8416
1600023N17Rik	4.7941	2.36941	6.62171	9.72496	1.06999	5.13249	0.285182	0.81461	NA	4.59507	5.30915
1600029I14Rik	1.59803	0	0	1.76817	4.27997	1.71083	2.26439	0.307875	NA	0.532678	2.58633
1700001C19Rik	4.7941	2.36941	0	2.65226	3.20998	3.42166	0.944776	0.543585	NA	2.38784	3.09463
1700001D01Rik	7.99017	0	11.0362	7.95678	11.7699	9.40957	0.771337	0.439927	0.999927	6.34212	9.71209
1700001G17Rik	0	0	1.10362	1.76817	2.13999	1.71083	2.52013	0.288799	NA	0.367873	1.873
1700001J03Rik	3.19607	1.18471	4.41447	2.65226	4.27997	4.27708	0.397298	0.751466	NA	2.93175	3.73644
1700001K19Rik	5.59312	7.10823	13.2434	8.84087	8.55995	22.2408	0.616595	0.432499	0.999927	8.64826	13.2139
1700001K23Rik	3.99508	1.18471	2.20724	5.30452	9.62994	1.71083	0.932717	0.434416	NA	2.46234	5.54843
1700001L05Rik	100.676	103.069	161.128	143.222	145.519	203.589	0.465283	0.0813233	0.999927	121.625	164.11
1700001L19Rik	0	1.18471	1.10362	0.884087	2.13999	0.855415	0.984531	0.67267	NA	0.762775	1.29316
1700001O22Rik	27.9656	15.4012	11.0362	15.9136	6.41996	25.6625	-0.243898	0.713585	0.999927	18.1343	15.9987
1700001P01Rik	0.799017	2.36941	1.10362	3.53635	2.13999	2.56625	0.971781	0.5573	NA	1.42402	2.74753
1700003D09Rik	27.9656	14.2165	60.699	62.7702	51.3597	51.3249	0.870691	0.0451174	0.999927	34.2937	55.1516
1700003E16Rik	61.5243	69.8976	33.1085	58.3497	40.6598	91.5294	0.213271	0.571466	0.999927	54.8435	63.513
1700003G13Rik	0.799017	2.36941	7.72533	3.53635	5.34997	4.27708	0.757862	0.540237	NA	3.63125	4.3878
1700003M02Rik	4.7941	0	4.41447	8.84087	0	1.71083	0.209431	0.900528	NA	3.06952	3.51723
1700007J10Rik	15.1813	17.7706	26.4868	18.5658	11.7699	21.3854	-0.166002	0.788741	0.999927	19.8129	17.2404
1700007K13Rik	3.99508	2.36941	6.62171	5.30452	12.8399	9.40957	1.12968	0.278336	0.999927	4.32873	9.18467
1700007L15Rik	17.5784	22.5094	16.5543	27.4067	16.0499	23.0962	0.231603	0.683486	0.999927	18.8807	22.1843
1700008J07Rik	17.5784	16.5859	22.0724	23.8703	28.8898	17.9637	0.319951	0.569351	0.999927	18.7455	23.5746
1700009J07Rik	1.59803	3.55412	1.10362	4.42044	2.13999	4.27708	0.85679	0.543387	NA	2.08526	3.6125
1700010I14Rik	9.5882	11.8471	18.7615	10.609	8.55995	7.69874	-0.547959	0.467103	0.999927	13.3989	8.95591
1700011E24Rik	0.799017	1.18471	3.31085	7.95678	2.13999	1.71083	1.1985	0.438136	NA	1.76486	3.93587
1700011I03Rik	2.39705	2.36941	4.41447	0.884087	5.34997	1.71083	-0.259141	0.856221	NA	3.06031	2.6483
1700012D01Rik	8.78918	4.73882	18.7615	7.95678	14.9799	11.1204	0.223621	0.766937	0.999927	10.7632	11.3524
1700012D14Rik	8.78918	4.73882	7.72533	11.4931	11.7699	6.84332	0.459663	0.565784	0.999927	7.08444	10.0355
1700012D16Rik	2.39705	0	0	0	0	0	-1.87721	0.555693	NA	0.799017	0
1700012I11Rik	1.59803	0	3.31085	0	0	0	-2.94202	0.251253	NA	1.6363	0
1700015E13Rik	3.99508	1.18471	4.41447	4.42044	6.41996	11.1204	1.17354	0.293113	NA	3.19809	7.32027
1700016C15Rik	59.9262	41.4647	90.4967	45.0884	67.4096	40.2045	-0.299524	0.395969	0.999927	63.9625	50.9009
1700017B05Rik	1087.46	1216.69	706.316	845.187	1014.35	1344.71	0.106067	0.431396	0.999927	1003.49	1068.08
1700018A04Rik	0	1.18471	3.31085	0.884087	0	0.855415	-0.723214	0.759371	NA	1.49852	0.579834
1700018L02Rik	6.39213	5.92353	7.72533	4.42044	11.7699	7.69874	0.248185	0.803034	0.999927	6.68033	7.96303
1700019B03Rik	0	0	0	0	1.06999	1.71083	2.26528	0.428436	NA	0	0.926941
1700019D03Rik	124.647	151.642	131.331	112.279	95.2294	99.2282	-0.406133	0.106572	0.999927	135.873	102.246
1700019G17Rik	50.338	45.0188	58.4918	61.002	67.4096	39.3491	0.100222	0.779982	0.999927	51.2829	55.9202
1700019L03Rik	7.99017	2.36941	2.20724	13.2613	3.20998	4.27708	0.746442	0.517985	NA	4.18894	6.91612
1700020D05Rik	0.799017	0	0	5.30452	4.27997	0.855415	3.18195	0.112229	NA	0.266339	3.47997
1700020I14Rik	864.536	934.733	1198.53	1003.44	1068.92	917.005	0.00602967	0.963747	0.999927	999.266	996.456
1700020L24Rik	0	3.55412	0	4.42044	5.34997	2.56625	2.18634	0.170067	NA	1.18471	4.11222
1700021F05Rik	182.176	220.355	183.201	247.544	213.999	173.649	0.111487	0.622035	0.999927	195.244	211.731
1700021K19Rik	451.444	373.182	346.536	366.896	400.178	462.78	0.0661521	0.686992	0.999927	390.388	409.951
1700022H01Rik	0	0	1.10362	0.884087	2.13999	0.855415	1.90479	0.436991	NA	0.367873	1.29316
1700022I11Rik	12.7843	14.2165	16.5543	12.3772	16.0499	12.8312	-0.0725813	0.911719	0.999927	14.5183	13.7528
1700024P16Rik	385.126	341.195	442.551	434.971	508.247	462.78	0.272431	0.0861788	0.999927	389.624	468.666
1700025G04Rik	322.004	305.654	322.257	520.727	401.248	384.081	0.457043	0.0106923	0.845096	316.638	435.352
1700025N23Rik	0	2.36941	5.51809	2.65226	1.06999	3.42166	0.510651	0.777916	NA	2.62917	2.38131
1700026L06Rik	0.799017	1.18471	0	1.76817	0	0.855415	0.569953	0.811465	NA	0.661241	0.87453
1700027J07Rik	2.39705	1.18471	5.51809	5.30452	4.27997	0.855415	0.113499	0.93485	NA	3.03328	3.47997
1700028E10Rik	3.99508	1.18471	5.51809	5.30452	7.48996	1.71083	0.350045	0.739329	0.999927	3.56596	4.8351
1700028J19Rik	181.377	159.935	162.232	170.629	148.729	214.709	0.0721742	0.747865	0.999927	167.848	178.022
1700028K03Rik	6.39213	8.29294	6.62171	5.30452	5.34997	3.42166	-0.61578	0.523859	0.999927	7.10226	4.69205
1700029I15Rik	9.5882	3.55412	8.82895	7.0727	8.55995	5.98791	-0.0350114	0.969518	0.999927	7.32375	7.20685
1700029J07Rik	35.1567	18.9553	54.0773	32.7112	57.7797	36.7829	0.289122	0.506173	0.999927	36.0631	42.4246
1700030C10Rik	24.7695	5.92353	6.62171	26.5226	3.20998	8.55415	0.111147	0.900746	0.999927	12.4383	12.7622
1700030J22Rik	5.59312	4.73882	2.20724	4.42044	1.06999	0	-1.34513	0.34903	NA	4.17973	1.83014
1700030K09Rik	51.9361	53.3117	59.5954	52.1611	37.4498	59.0237	-0.153025	0.679799	0.999927	54.9477	49.5449
1700034H15Rik	11.9852	3.55412	16.5543	16.7977	18.1899	15.3975	0.718649	0.318495	0.999927	10.6979	16.795
1700034I23Rik	6.39213	2.36941	11.0362	7.95678	14.9799	2.56625	0.269004	0.777522	0.999927	6.59924	8.50098
1700034J05Rik	2.39705	4.73882	2.20724	6.18861	7.48996	5.13249	1.04131	0.3618	NA	3.11437	6.27035
1700034P13Rik	0.799017	1.18471	1.10362	0	1.06999	3.42166	0.233447	0.91576	NA	1.02911	1.49722
1700037C18Rik	23.1715	26.0635	18.7615	15.0295	21.3999	24.807	-0.152309	0.779704	0.999927	22.6655	20.4121
1700037H04Rik	71.1125	120.84	82.7714	53.0452	94.1594	80.409	-0.265223	0.43203	0.999927	91.5746	75.8712
1700040L02Rik	27.1666	37.9106	38.6266	18.5658	27.8198	17.1083	-0.709198	0.146971	0.999927	34.5679	21.1647
1700041A01Rik	15.9803	17.7706	22.0724	44.2044	18.1899	15.3975	0.497675	0.482356	0.999927	18.6078	25.9306
1700045H11Rik	3.19607	2.36941	2.20724	3.53635	2.13999	2.56625	0.069836	0.965822	NA	2.5909	2.74753
1700047A11Rik	5.59312	3.55412	16.5543	11.4931	10.6999	8.55415	0.525589	0.536064	0.999927	8.56717	10.2491
1700047G03Rik	0.799017	0	2.20724	0.884087	0	1.71083	0.196193	0.941592	NA	1.00208	0.864973
1700047M11Rik	0	2.36941	2.20724	0.884087	1.06999	2.56625	0.114478	0.95911	NA	1.52555	1.50678
1700048M11Rik	2.39705	0	5.51809	4.42044	6.41996	6.84332	1.41277	0.242059	NA	2.63838	5.89457
1700048O20Rik	4.7941	1.18471	1.10362	3.53635	2.13999	2.56625	0.34151	0.81501	NA	2.36081	2.74753
1700049G17Rik	163.798	169.413	268.179	191.847	213.999	196.746	0.0428358	0.840867	0.999927	200.464	200.864
1700052I22Rik	3.19607	1.18471	0	0.884087	0	0	-1.43231	0.621752	NA	1.46026	0.294696
1700052K11Rik	27.9656	24.8788	32.0049	47.7407	38.5198	25.6625	0.386948	0.398416	0.999927	28.2831	37.3076
1700056E22Rik	3.19607	1.18471	1.10362	1.76817	1.06999	3.42166	0.161382	0.926391	NA	1.82813	2.08661
1700061G19Rik	4.7941	1.18471	3.31085	1.76817	3.20998	0.855415	-0.802918	0.570559	NA	3.09655	1.94452
1700061I17Rik	4.7941	2.36941	15.4507	10.609	13.9099	9.40957	0.897978	0.327006	0.999927	7.53806	11.3095
1700065J18Rik	1.59803	1.18471	0	0.884087	2.13999	3.42166	1.32909	0.536063	NA	0.92758	2.14858
1700066B19Rik	12.7843	10.6623	2.20724	37.1317	2.13999	4.27708	0.954239	0.345307	0.999927	8.55128	14.5162
1700066M21Rik	181.377	161.12	164.439	164.44	135.889	98.3728	-0.373648	0.113223	0.999927	168.979	132.901
1700066N21Rik	11.9852	7.10823	13.2434	17.6817	5.34997	29.0841	0.57904	0.535888	0.999927	10.779	17.3719
1700067K01Rik	11.1862	5.92353	7.72533	4.42044	9.62994	9.40957	-0.112892	0.89567	0.999927	8.27836	7.81998
1700069P05Rik	3.19607	1.18471	5.51809	13.2613	10.6999	6.84332	1.72168	0.114729	0.999927	3.29962	10.2682
1700071M16Rik	1.59803	3.55412	7.72533	7.0727	2.13999	5.13249	0.385398	0.76247	NA	4.29249	4.78173
1700084C01Rik	0.799017	1.18471	0	0.884087	0	0.855415	-0.118676	0.964923	NA	0.661241	0.579834
1700084E18Rik	6.39213	4.73882	2.20724	1.76817	0	6.84332	-1.01404	0.475484	NA	4.44606	2.8705
1700084J12Rik	0.799017	0	1.10362	3.53635	3.20998	0.855415	1.86688	0.333677	NA	0.634212	2.53391
1700086O06Rik	41.5489	39.0953	64.0099	39.7839	48.1497	56.4574	0.0332165	0.931214	0.999927	48.218	48.1303
1700088E04Rik	3.19607	2.36941	1.10362	1.76817	1.06999	1.71083	-0.476612	0.783097	NA	2.22303	1.51633
1700092M07Rik	3.19607	1.18471	4.41447	1.76817	2.13999	2.56625	-0.383121	0.775284	NA	2.93175	2.15814
1700094D03Rik	59.9262	53.3117	96.0148	64.5384	143.379	80.409	0.486485	0.140887	0.999927	69.7509	96.1088
1700094J05Rik	0	0	0	4.42044	2.13999	0	3.49562	0.20554	NA	0	2.18681
1700095J12Rik	0.799017	3.55412	4.41447	2.65226	3.20998	4.27708	0.309703	0.804323	NA	2.92254	3.37977
1700096K18Rik	30.3626	33.1718	60.699	31.8271	43.8697	41.9153	-0.00389965	0.992555	0.999927	41.4111	39.2041
1700099I09Rik	2.39705	1.18471	0	3.53635	1.06999	2.56625	1.29831	0.507991	NA	1.19392	2.39086
1700101I11Rik	4.7941	1.18471	3.31085	1.76817	4.27997	2.56625	-0.026368	0.986074	NA	3.09655	2.87146
1700102H20Rik	3.19607	5.92353	5.51809	4.42044	6.41996	8.55415	0.414482	0.720804	NA	4.87923	6.46485
1700102P08Rik	11.1862	8.29294	7.72533	13.2613	16.0499	10.265	0.515908	0.460381	0.999927	9.06817	13.1921
1700108F19Rik	3.19607	5.92353	5.51809	0	2.13999	5.13249	-1.20729	0.397259	NA	4.87923	2.42416
1700108J01Rik	3.99508	1.18471	5.51809	1.76817	4.27997	1.71083	-0.516576	0.737242	NA	3.56596	2.58633
1700109H08Rik	25.5685	5.92353	22.0724	12.3772	33.1698	21.3854	0.306242	0.638331	0.999927	17.8548	22.3108
1700109K24Rik	17.5784	10.6623	33.1085	30.943	34.2398	29.9395	0.739539	0.140258	0.999927	20.4498	31.7075
1700110C19Rik	1.59803	2.36941	0	1.76817	0	5.13249	0.705898	0.721382	NA	1.32248	2.30022
1700110K17Rik	4.7941	0	2.20724	2.65226	0	0.855415	-0.966759	0.659642	NA	2.33378	1.16923
1700112E06Rik	3.99508	0	4.41447	2.65226	9.62994	7.69874	1.42874	0.300444	NA	2.80319	6.66031
1700112J16Rik	21.5734	18.9553	30.9013	22.9863	27.8198	14.5421	-0.13524	0.797441	0.999927	23.81	21.7827
1700113A16Rik	105.47	97.1459	115.88	86.6405	123.049	122.324	0.0601663	0.826401	0.999927	106.165	110.671
1700119H24Rik	0.799017	0	2.20724	0.884087	2.13999	0.855415	0.633671	0.765644	NA	1.00208	1.29316
1700120C14Rik	0	1.18471	3.31085	1.76817	0	0.855415	-0.235143	0.928214	NA	1.49852	0.87453
1700120E14Rik	6.39213	7.10823	15.4507	8.84087	14.9799	17.9637	0.637891	0.415977	0.999927	9.65034	13.9282
1700120K04Rik	8.78918	7.10823	8.82895	10.609	3.20998	3.42166	-0.496121	0.623789	0.999927	8.24212	5.7469
1700123I01Rik	3.19607	1.18471	0	0.884087	1.06999	3.42166	0.538199	0.799328	NA	1.46026	1.79191
1700123M08Rik	18.3774	15.4012	29.7977	16.7977	27.8198	15.3975	-0.0599953	0.917303	0.999927	21.1921	20.005
1700123O20Rik	237.308	259.451	251.625	273.183	252.519	207.866	-0.0369901	0.84397	0.999927	249.461	244.522
1700125H03Rik	1.59803	0	2.20724	2.65226	1.06999	0.855415	0.348779	0.859564	NA	1.26842	1.52589
1700126H18Rik	0.799017	1.18471	1.10362	2.65226	2.13999	0.855415	0.895762	0.657533	NA	1.02911	1.88255
1810006J02Rik	1.59803	4.73882	0	0.884087	0	0	-1.93894	0.418321	NA	2.11229	0.294696
1810009A15Rik	0.799017	0	0	5.30452	1.06999	0.855415	2.81996	0.273673	NA	0.266339	2.40998
1810010D01Rik	0.799017	1.18471	1.10362	0.884087	1.06999	0.855415	-0.11799	0.959741	NA	1.02911	0.936499
1810010H24Rik	38.3528	31.987	43.0411	22.1022	32.0998	29.9395	-0.427202	0.352255	0.999927	37.7937	28.0472
1810011H11Rik	8.78918	18.9553	13.2434	9.72496	17.1199	13.6866	0.000356119	0.999615	0.999927	13.6626	13.5105
1810011O10Rik	1117.03	1593.43	929.247	1070.63	1129.91	1241.21	-0.0643106	0.672961	0.999927	1213.23	1147.25
1810012K16Rik	11.1862	8.29294	14.347	11.4931	7.48996	9.40957	-0.230906	0.754096	0.999927	11.2754	9.46422
1810013A23Rik	2.39705	1.18471	0	4.42044	1.06999	1.71083	1.32246	0.45304	NA	1.19392	2.40042
1810013L24Rik	1030.73	1171.67	1623.42	1041.45	1337.49	1154.81	-0.0850144	0.538667	0.999927	1275.28	1177.92
1810014B01Rik	51.1371	56.8659	57.3881	38.8998	63.1296	47.9033	-0.145683	0.691231	0.999927	55.1304	49.9776
1810019D21Rik	243.7	172.967	299.081	391.651	296.388	307.949	0.503871	0.0210603	0.999927	238.583	331.996
1810021B22Rik	35.9557	33.1718	33.1085	10.609	25.6798	31.6504	-0.619857	0.246213	0.999927	34.0787	22.6464
1810022K09Rik	277.259	342.38	311.22	326.228	391.618	294.263	0.112867	0.536948	0.999927	310.286	337.37
1810024B03Rik	15.1813	9.47764	15.4507	12.3772	16.0499	17.9637	0.206477	0.759869	0.999927	13.3699	15.4636
1810026B05Rik	340.381	274.852	475.659	441.159	507.177	373.816	0.298218	0.0669554	0.999927	363.631	440.718
1810026J23Rik	532.944	534.302	510.975	648.036	711.546	619.321	0.325127	0.0270092	0.999927	526.074	659.634
1810030O07Rik	449.047	398.061	568.363	442.044	482.567	428.563	-0.0510544	0.743726	0.999927	471.824	451.058
1810032O08Rik	53.5341	42.6494	47.4556	53.0452	70.6196	49.6141	0.255126	0.470869	0.999927	47.8797	57.7596
1810034E14Rik	37.5538	27.2482	26.4868	28.2908	36.3798	27.3733	0.00336615	0.994256	0.999927	30.4296	30.6813
1810037I17Rik	254.886	300.915	228.449	301.474	191.529	213.854	-0.1587	0.4534	0.999927	261.417	235.619
1810041H14Rik	5.59312	9.47764	9.93256	11.4931	11.7699	6.84332	0.280119	0.738875	0.999927	8.33444	10.0355
1810041L15Rik	3.99508	5.92353	4.41447	0.884087	0	2.56625	-2.32203	0.174688	NA	4.77769	1.15011
1810043G02Rik	52.7351	91.2223	56.2845	55.6975	62.0596	73.5657	-0.0568885	0.866715	0.999927	66.7473	63.7743
1810043H04Rik	51.1371	59.2353	20.9687	38.8998	34.2398	45.337	-0.0543537	0.896716	0.999927	43.7804	39.4922
1810044D09Rik	31.1616	23.6941	28.6941	19.4499	24.6099	26.5179	-0.252472	0.616782	0.999927	27.8499	23.5259
1810046K07Rik	3.19607	1.18471	3.31085	0.884087	0	1.71083	-1.61763	0.384244	NA	2.56388	0.864973
1810055G02Rik	141.426	127.948	94.9112	200.688	62.0596	86.3969	-0.0543394	0.883276	0.999927	121.428	116.381
1810058I24Rik	135.034	100.7	110.362	140.57	120.909	102.65	0.06592	0.813829	0.999927	115.365	121.376
1810062G17Rik	63.9213	43.8341	55.1809	56.5816	36.3798	53.8912	-0.157167	0.681608	0.999927	54.3121	48.9508
1810062O18Rik	3.99508	1.18471	6.62171	3.53635	8.55995	4.27708	0.58521	0.624478	NA	3.93383	5.45779
1810063I02Rik	3.19607	0	0	0.884087	2.13999	3.42166	1.07845	0.635536	NA	1.06536	2.14858
1810064F22Rik	13.5833	17.7706	33.1085	17.6817	34.2398	18.8191	0.203227	0.716912	0.999927	21.4875	23.5802
2010001A14Rik	27.9656	31.987	34.2122	28.2908	31.0298	27.3733	-0.115084	0.804073	0.999927	31.3883	28.898
2010003K11Rik	0	9.47764	0	0	7.48996	0.855415	0.35843	0.840448	NA	3.15921	2.78179
2010009K17Rik	0.799017	2.36941	2.20724	1.76817	3.20998	5.98791	1.03175	0.522367	NA	1.79189	3.65535
2010012O05Rik	94.284	98.3306	109.258	83.9883	84.5295	97.5173	-0.180111	0.521613	0.999927	100.624	88.6784
2010016I18Rik	71.9115	41.4647	92.7039	158.252	126.259	89.8186	0.871275	0.00459387	0.5841	68.6934	124.776
2010106C02Rik	0.799017	1.18471	1.10362	1.76817	0	0	-0.786266	0.732024	NA	1.02911	0.589391
2010107E04Rik	752.674	1060.31	954.63	1104.22	964.064	830.608	0.0509415	0.75087	0.999927	922.538	966.299
2010107G12Rik	0.799017	0	1.10362	2.65226	2.13999	1.71083	1.80732	0.420392	NA	0.634212	2.16769
2010107G23Rik	127.843	119.655	103.74	118.468	121.979	118.047	0.0299465	0.905277	0.999927	117.079	119.498
2010109A12Rik	4.7941	5.92353	4.41447	9.72496	3.20998	5.13249	0.217191	0.829364	0.999927	5.04403	6.02248
2010109I03Rik	6.39213	1.18471	7.72533	3.53635	8.55995	4.27708	0.144524	0.89298	0.999927	5.10072	5.45779
2010111I01Rik	1661.16	1636.08	2208.34	2117.39	2428.89	2317.32	0.336901	0.00353592	0.541837	1835.19	2287.86
2010204K13Rik	3.99508	1.18471	5.51809	4.42044	0	5.13249	-0.15486	0.911543	NA	3.56596	3.18431
2010300C02Rik	857.345	856.542	784.673	775.344	724.386	941.812	-0.0346838	0.798845	0.999927	832.853	813.847
2010310C07Rik	3.19607	2.36941	8.82895	8.84087	6.41996	1.71083	0.280876	0.801703	NA	4.79814	5.65722
2010315B03Rik	655.993	669.359	883.998	745.285	756.486	636.429	-0.0398593	0.766477	0.999927	736.45	712.733
2010320M18Rik	88.6908	75.8212	61.8026	72.4951	49.2197	82.1199	-0.158167	0.631489	0.999927	75.4382	67.9449
2200002D01Rik	9.5882	8.29294	5.51809	10.609	10.6999	5.98791	0.199253	0.825749	0.999927	7.79974	9.09896
2200002J24Rik	3.99508	9.47764	1.10362	2.65226	1.06999	2.56625	-0.829089	0.598762	NA	4.85878	2.09617
2210011C24Rik	1.59803	3.55412	1.10362	4.42044	5.34997	0	0.248116	0.88567	NA	2.08526	3.2568
2210013O21Rik	75.9066	81.7447	78.3569	62.7702	83.4595	67.5778	-0.145858	0.630029	0.999927	78.6694	71.2692
2210015D19Rik	98.279	131.502	109.258	165.324	118.769	116.336	0.241376	0.370723	0.999927	113.013	133.477
2210016F16Rik	454.64	530.748	451.38	564.048	452.607	426.852	0.00966859	0.955397	0.999927	478.923	481.169
2210016L21Rik	251.69	267.743	208.584	248.428	233.259	286.564	0.0795946	0.669791	0.999927	242.673	256.084
2210018M11Rik	389.121	399.246	536.358	465.03	460.097	420.009	0.0425564	0.784101	0.999927	441.575	448.379
2210039B01Rik	4.7941	5.92353	8.82895	6.18861	7.48996	4.27708	-0.0929477	0.928353	0.999927	6.51552	5.98521
2210404O09Rik	47.142	28.4329	38.6266	46.8566	57.7797	22.2408	0.0621817	0.884477	0.999927	38.0672	42.2924
2210406O10Rik	23.1715	18.9553	23.176	7.95678	16.0499	20.53	-0.583188	0.34101	0.999927	21.7676	14.8456
2210407C18Rik	7.99017	9.47764	18.7615	7.0727	23.5399	11.9758	0.302146	0.692516	0.999927	12.0764	14.1961
2210408F21Rik	116.656	150.458	124.709	91.945	150.869	141.999	-0.0264693	0.924211	0.999927	130.608	128.271
2210408I21Rik	109.465	107.808	165.543	117.584	124.119	105.216	-0.11458	0.642817	0.999927	127.605	115.64
2210409D07Rik	76.7056	87.6682	120.294	21.2181	85.5995	65.0116	-0.707727	0.10517	0.999927	94.8894	57.2764
2210416O15Rik	5.59312	4.73882	15.4507	9.72496	6.41996	2.56625	-0.384479	0.676741	0.999927	8.5942	6.23706
2210417A02Rik	0.799017	3.55412	5.51809	0.884087	2.13999	0	-1.92242	0.29153	NA	3.29041	1.00802
2300009A05Rik	75.1076	72.267	76.1497	79.5678	78.1095	85.5415	0.120373	0.689285	0.999927	74.5081	81.073
2310001H17Rik	460.234	407.539	545.187	413.753	619.526	539.767	0.164123	0.371906	0.999927	470.987	524.349
2310002L09Rik	24.7695	18.9553	20.9687	30.059	33.1698	26.5179	0.459526	0.373922	0.999927	21.5645	29.9155
2310008N11Rik	0.799017	7.10823	2.20724	1.76817	4.27997	2.56625	-0.254198	0.865463	NA	3.3715	2.87146
2310009A05Rik	129.441	120.84	101.533	147.643	119.839	122.324	0.147807	0.559009	0.999927	117.271	129.935
2310009B15Rik	30.3626	35.5412	23.176	26.5226	21.3999	24.807	-0.280464	0.571522	0.999927	29.6933	24.2432
2310010G23Rik	6.39213	7.10823	9.93256	7.95678	20.3299	7.69874	0.579354	0.496422	0.999927	7.81098	11.9951
2310010J17Rik	44.7449	43.8341	48.5592	29.1749	49.2197	43.6262	-0.168688	0.678855	0.999927	45.7127	40.6736
2310011J03Rik	206.945	202.585	114.776	200.688	163.709	183.914	0.100176	0.652018	0.999927	174.769	182.77
2310015A10Rik	173.387	107.808	184.304	148.527	154.079	136.011	-0.0789157	0.754932	0.999927	155.166	146.206
2310022A10Rik	56.7302	61.6047	51.8701	55.6975	46.0097	59.8791	-0.0729197	0.839003	0.999927	56.735	53.8621
2310022B05Rik	147.818	127.948	178.786	186.542	100.579	132.589	-0.0979324	0.721181	0.999927	151.517	139.904
2310030G06Rik	245.298	362.52	303.495	348.33	341.328	295.118	0.112818	0.56728	0.999927	303.771	328.259
2310033P09Rik	83.8967	79.3753	71.7352	86.6405	89.8795	97.5173	0.221233	0.438923	0.999927	78.3357	91.3458
2310034G01Rik	10.3872	11.8471	11.0362	10.609	11.7699	11.1204	0.0218637	0.977122	0.999927	11.0902	11.1665
2310035C23Rik	630.424	664.62	934.765	694.008	875.255	700.585	0.047213	0.738655	0.999927	743.27	756.616
2310036O22Rik	453.841	530.748	425.997	487.132	548.907	483.31	0.113242	0.480375	0.999927	470.195	506.449
2310039H08Rik	98.279	81.7447	93.8075	128.193	84.5295	76.9874	0.0740451	0.806952	0.999927	91.2771	96.5698
2310040G24Rik	39.9508	36.7259	37.523	44.2044	37.4498	34.2166	0.0156728	0.970739	0.999927	38.0666	38.6236
2310043O21Rik	2.39705	4.73882	6.62171	8.84087	9.62994	10.265	1.15962	0.215909	0.999927	4.58586	9.5786
2310045N01Rik	201.352	189.553	168.854	183.006	175.479	216.42	0.035767	0.861453	0.999927	186.586	191.635
2310047M10Rik	109.465	110.178	86.0822	83.9883	88.8095	112.915	-0.0995948	0.709503	0.999927	101.908	95.2375
2310057J18Rik	305545	354971	342620	364048	406487	376801	0.195747	0.0691049	0.999927	334379	382446
2310057M21Rik	87.8918	90.0376	61.8026	80.4519	116.629	89.8186	0.269302	0.396117	0.999927	79.9107	95.6333
2310061I04Rik	61.5243	65.1588	60.699	77.7997	67.4096	66.7224	0.179872	0.585123	0.999927	62.4607	70.6439
2310067B10Rik	741.487	710.823	506.561	532.22	497.547	819.488	-0.0974634	0.491044	0.999927	652.957	616.418
2310068J16Rik	2.39705	0	2.20724	0	3.20998	0.855415	-0.276295	0.881726	NA	1.53476	1.35513
2310069B03Rik	36.7548	36.7259	50.7664	30.943	34.2398	42.7708	-0.187097	0.657448	0.999927	41.4157	35.9845
2310069G16Rik	27.1666	15.4012	13.2434	44.2044	31.0298	23.9516	0.82789	0.139481	0.999927	18.6037	33.0619
2400006E01Rik	10.3872	11.8471	7.72533	11.4931	9.62994	9.40957	0.0537959	0.952104	0.999927	9.98653	10.1775
2410002F23Rik	3948.74	2964.13	3934.4	3988.12	4531.42	4822.83	0.300601	0.0260899	0.999927	3615.76	4447.46
2410004B18Rik	117.455	149.273	120.294	120.236	114.489	113.77	-0.15284	0.543496	0.999927	129.008	116.165
2410006H16Rik	107.068	73.4517	69.5279	66.3065	82.3895	67.5778	-0.211004	0.486973	0.999927	83.3493	72.0913
2410015M20Rik	664.782	907.484	552.913	659.529	549.977	711.706	-0.144313	0.37893	0.999927	708.393	640.404
2410016O06Rik	126.245	136.241	103.74	116.699	108.069	137.722	-0.0121879	0.960994	0.999927	122.075	120.83
2410089E03Rik	293.239	253.527	359.78	275.835	329.558	291.697	-0.00370662	0.983501	0.999927	302.182	299.03
2410127L17Rik	98.279	104.254	113.673	115.815	101.649	75.2765	-0.124462	0.648837	0.999927	105.402	97.5804
2410131K14Rik	177.382	207.323	98.222	152.947	184.039	162.529	0.114178	0.664405	0.999927	160.976	166.505
2500002B13Rik	7.19115	7.10823	19.8651	16.7977	24.6099	17.1083	0.931527	0.140628	0.999927	11.3882	19.5053
2500004C02Rik	31.1616	33.1718	43.0411	30.059	53.4997	26.5179	0.0144185	0.974212	0.999927	35.7915	36.6922
2510002D24Rik	163.798	199.031	176.579	167.977	174.409	160.818	-0.0979052	0.649057	0.999927	179.803	167.735
2510003B16Rik	4.7941	2.36941	7.72533	7.0727	2.13999	1.71083	-0.433777	0.712119	NA	4.96295	3.64117
2510009E07Rik	211.739	188.368	211.895	200.688	224.699	197.601	0.0224639	0.911765	0.999927	204.001	207.662
2510039O18Rik	616.042	630.263	445.862	483.596	370.218	656.959	-0.177695	0.260676	0.999927	564.056	503.591
2610001J05Rik	152.612	194.292	155.61	221.906	197.949	169.372	0.225984	0.310364	0.999927	167.505	196.409
2610002M06Rik	423.479	419.386	467.934	442.044	483.637	365.262	-0.0298463	0.845949	0.999927	436.933	430.314
2610005L07Rik	56.7302	37.9106	56.2845	60.1179	60.9896	60.7345	0.267587	0.449748	0.999927	50.3084	60.614
2610008E11Rik	303.626	273.667	450.276	365.128	357.378	296.829	0.0159141	0.926284	0.999927	342.523	339.778
2610015P09Rik	125.446	122.025	156.714	129.961	146.589	153.119	0.100208	0.677035	0.999927	134.728	143.223
2610016A17Rik	7.99017	7.10823	19.8651	14.1454	12.8399	11.1204	0.280072	0.709157	0.999927	11.6545	12.7019
2610020C07Rik	19.1764	17.7706	24.2796	26.5226	16.0499	23.9516	0.137811	0.79666	0.999927	20.4089	22.1747
2610020H08Rik	51.9361	47.3882	64.0099	45.0884	60.9896	53.8912	-0.0199836	0.956443	0.999927	54.4447	53.3231
2610027K06Rik	4.7941	4.73882	6.62171	6.18861	11.7699	9.40957	0.768855	0.408873	0.999927	5.38488	9.1227
2610028H24Rik	0.799017	1.18471	1.10362	0.884087	1.06999	0	-0.893763	0.708725	NA	1.02911	0.65136
2610035D17Rik	206.146	228.648	224.034	221.906	228.979	269.456	0.128586	0.512105	0.999927	219.61	240.113
2610037D02Rik	5.59312	1.18471	4.41447	1.76817	1.06999	0	-2.16079	0.168126	NA	3.73076	0.946056
2610044O15Rik8	105.47	111.362	144.574	130.845	112.349	84.6861	-0.148305	0.578753	0.999927	120.469	109.293
2610203C22Rik	19.1764	24.8788	17.6579	36.2476	25.6798	13.6866	0.254227	0.668383	0.999927	20.571	25.2047
2610206C17Rik	0.799017	0	1.10362	0.884087	2.13999	0.855415	0.979279	0.623837	NA	0.634212	1.29316
2610301B20Rik	151.813	215.616	147.885	152.947	206.509	164.24	0.0309955	0.898961	0.999927	171.771	174.565
2610305D13Rik	205.347	92.407	260.454	236.935	10.6999	18.8191	-1.25356	0.267047	0.999927	186.069	88.8181
2610306M01Rik	26.3675	37.9106	29.7977	30.059	24.6099	31.6504	-0.125622	0.799119	0.999927	31.3586	28.7731
2610307P16Rik	45.5439	34.3565	71.7352	46.8566	52.4297	40.2045	-0.0729056	0.850572	0.999927	50.5452	46.4969
2610318N02Rik	4.7941	2.36941	3.31085	5.30452	5.34997	4.27708	0.495451	0.697555	NA	3.49146	4.97719
2610507B11Rik	6407.31	7263.43	7087.44	8214.94	7315.55	6862.14	0.116059	0.314455	0.999927	6919.39	7464.21
2610507I01Rik	237.308	229.833	335.5	278.487	362.728	295.118	0.242429	0.194299	0.999927	267.547	312.111
2610524H06Rik	36.7548	20.14	26.4868	45.0884	43.8697	29.9395	0.481906	0.307434	0.999927	27.7939	39.6326
2610528A11Rik	3.99508	0	0	0	0	0.855415	-1.4642	0.581623	NA	1.33169	0.285138
2610528J11Rik	242.901	329.348	291.355	336.837	347.748	324.202	0.227292	0.223326	0.999927	287.868	336.262
2700029M09Rik	186.171	202.585	167.75	260.806	158.359	152.264	0.0234607	0.923381	0.999927	185.502	190.476
2700038G22Rik	17.5784	17.7706	16.5543	24.7544	27.8198	8.55415	0.125782	0.837956	0.999927	17.3011	20.3761
2700046A07Rik	1.59803	0	4.41447	4.42044	4.27997	5.13249	1.57813	0.274726	NA	2.00417	4.61097
2700046G09Rik	25.5685	26.0635	32.0049	38.8998	32.0998	27.3733	0.236717	0.601686	0.999927	27.879	32.791
2700049A03Rik	239.705	209.693	267.076	225.442	250.379	242.938	0.009257	0.961252	0.999927	238.824	239.586
2700054A10Rik	22.3725	14.2165	25.3832	20.334	36.3798	19.6746	0.280984	0.6105	0.999927	20.6574	25.4628
2700060E02Rik	850.154	858.912	965.666	953.046	852.785	766.452	-0.0617823	0.633358	0.999927	891.577	857.428
2700062C07Rik	109.465	127.948	128.02	125.54	133.749	111.204	0.0220656	0.929264	0.999927	121.811	123.498
2700070H01Rik	0.799017	2.36941	2.20724	0	0	0.855415	-2.52333	0.338078	NA	1.79189	0.285138
2700081O15Rik	71.1125	87.6682	104.844	76.9156	86.6695	82.9753	-0.0746383	0.79572	0.999927	87.8748	82.1868
2700094K13Rik	97.48	92.407	75.046	67.1906	69.5496	98.3728	-0.184028	0.550536	0.999927	88.311	78.371
2700097O09Rik	48.74	78.1906	81.6677	80.4519	82.3895	53.8912	0.0445728	0.89371	0.999927	69.5328	72.2442
2700099C18Rik	3.19607	2.36941	8.82895	4.42044	11.7699	8.55415	0.975251	0.359113	0.999927	4.79814	8.24817
2810001G20Rik	67.9164	61.6047	102.636	91.061	102.719	86.3969	0.302126	0.296973	0.999927	77.3859	93.3924
2810002D19Rik	48.74	36.7259	32.0049	44.2044	55.6397	40.2045	0.246648	0.546367	0.999927	39.1569	46.6828
2810004N23Rik	223.725	217.986	211.895	294.401	274.988	254.058	0.334517	0.0850096	0.999927	217.868	274.483
2810006K23Rik	74.3085	74.6364	60.699	72.4951	66.3396	55.602	-0.118396	0.715889	0.999927	69.8813	64.8122
2810013P06Rik	138.23	142.165	125.812	134.381	173.339	136.866	0.123883	0.60555	0.999927	135.402	148.196
2810021J22Rik	89.4899	71.0823	83.875	124.656	102.719	98.3728	0.406423	0.14652	0.999927	81.4824	108.583
2810025M15Rik	44.7449	41.4647	51.8701	40.668	42.7997	40.2045	-0.154603	0.692982	0.999927	46.0266	41.2241
2810029C07Rik	7.99017	4.73882	6.62171	11.4931	10.6999	9.40957	0.693402	0.418211	0.999927	6.45023	10.5342
2810032G03Rik	6.39213	4.73882	5.51809	6.18861	8.55995	4.27708	0.150041	0.88502	NA	5.54968	6.34188
2810047C21Rik1	8.78918	4.73882	7.72533	6.18861	6.41996	4.27708	-0.356748	0.712808	0.999927	7.08444	5.62855
2810403A07Rik	903.688	806.784	1152.18	1221.81	1218.72	1023.93	0.289907	0.0212552	0.999927	954.217	1154.82
2810403D21Rik	23.9705	18.9553	46.352	15.9136	24.6099	27.3733	-0.291283	0.571354	0.999927	29.7593	22.6322
2810405F15Rik	6.39213	9.47764	11.0362	22.1022	11.7699	21.3854	1.06064	0.153539	0.999927	8.96865	18.4192
2810408A11Rik	6.39213	5.92353	11.0362	7.0727	10.6999	11.1204	0.371069	0.667206	0.999927	7.78395	9.63101
2810408I11Rik	0.799017	1.18471	1.10362	1.76817	1.06999	0.855415	0.267331	0.912925	NA	1.02911	1.23119
2810410L24Rik	23.9705	17.7706	18.7615	38.0157	24.6099	37.6383	0.720551	0.147471	0.999927	20.1675	33.4213
2810417H13Rik	56.7302	11.8471	12.1398	9.72496	19.2599	21.3854	-0.51336	0.402398	0.999927	26.9057	16.7901
2810428I15Rik	100.676	100.7	45.2483	77.7997	54.5697	108.638	0.00492824	0.987521	0.999927	82.2081	80.3357
2810433D01Rik	7.99017	10.6623	7.72533	4.42044	12.8399	7.69874	-0.0840971	0.926613	0.999927	8.79261	8.3197
2810442N19Rik	7.99017	1.18471	13.2434	13.2613	9.62994	3.42166	0.273479	0.779329	0.999927	7.47276	8.77097
2810454H06Rik	23.9705	24.8788	27.5905	25.6385	35.3098	23.0962	0.124602	0.80374	0.999927	25.4799	28.0148
2810459M11Rik	102.274	55.6812	98.222	160.904	44.9397	47.0478	-0.0583908	0.895667	0.999927	85.3924	84.2971
2810468N07Rik	7.19115	9.47764	5.51809	7.0727	5.34997	6.84332	-0.173685	0.852166	0.999927	7.39563	6.422
2810474O19Rik	1549.29	1746.26	1602.45	1597.55	2799.1	1675.76	0.293923	0.11042	0.999927	1632.67	2024.14
2900005J15Rik	21.5734	9.47764	43.0411	46.8566	41.7298	31.6504	0.84604	0.0813334	0.999927	24.6974	40.0789
2900008C10Rik	6.39213	5.92353	1.10362	0.884087	0	2.56625	-1.96206	0.220114	NA	4.47309	1.15011
2900009J06Rik	0.799017	2.36941	0	0	1.06999	0.855415	-0.499436	0.84205	NA	1.05614	0.641803
2900011O08Rik	3.19607	2.36941	2.20724	1.76817	0	0.855415	-1.57294	0.395811	NA	2.5909	0.87453
2900026A02Rik	275.661	283.145	360.883	305.894	359.518	346.443	0.153827	0.401621	0.999927	306.563	337.285
2900041M22Rik	2.39705	0	1.10362	0.884087	1.06999	1.71083	0.0613456	0.975471	NA	1.16689	1.22164
2900052N01Rik	12.7843	5.92353	0	0.884087	5.34997	0	-1.10436	0.42247	0.999927	6.23593	2.07802
2900057B20Rik	10.3872	5.92353	24.2796	15.0295	16.0499	8.55415	0.125058	0.861961	0.999927	13.5301	13.2112
2900060B14Rik	7.19115	10.6623	3.31085	12.3772	6.41996	15.3975	0.757994	0.342818	0.999927	7.05478	11.3982
2900076A07Rik	56.7302	59.2353	75.046	98.1337	80.2495	63.3007	0.338007	0.267576	0.999927	63.6705	80.5613
2900097C17Rik	2425.81	2545.93	2763.46	2650.49	2808.73	2459.32	0.0392644	0.711799	0.999927	2578.4	2639.52
3000002C10Rik	35.1567	33.1718	30.9013	44.2044	36.3798	28.2287	0.122249	0.78263	0.999927	33.0766	36.2709
3010026O09Rik	33.5587	17.7706	24.2796	25.6385	32.0998	21.3854	0.0419477	0.935966	0.999927	25.203	26.3746
3110001I22Rik	44.7449	72.267	52.9737	53.9293	83.4595	57.3128	0.192573	0.592085	0.999927	56.6619	64.9005
3110002H16Rik	297.234	315.132	306.806	381.926	349.888	389.214	0.288021	0.0852193	0.999927	306.391	373.676
3110009E18Rik	15.9803	15.4012	15.4507	17.6817	12.8399	14.5421	-0.0580831	0.929512	0.999927	15.6107	15.0212
3110021A11Rik	0	3.55412	5.51809	7.95678	1.06999	4.27708	0.946596	0.53287	NA	3.02407	4.43462
3110021N24Rik	100.676	78.1906	79.4605	56.5816	123.049	79.5536	-0.0104498	0.975792	0.999927	86.1091	86.3948
3110035E14Rik	10.3872	2.36941	4.41447	15.9136	9.62994	3.42166	0.638378	0.55028	0.999927	5.7237	9.65506
3110039I08Rik	58.3282	69.8976	91.6003	85.7564	98.4394	75.2765	0.262206	0.37905	0.999927	73.2754	86.4908
3110040N11Rik	127.843	140.98	130.227	136.149	94.1594	112.915	-0.218532	0.392557	0.999927	133.017	114.408
3110043O21Rik	283.651	240.495	317.842	304.126	270.708	219.842	-0.086419	0.63712	0.999927	280.663	264.892
3110045C21Rik	3.99508	2.36941	1.10362	7.95678	3.20998	3.42166	1.02289	0.427973	NA	2.48937	4.86281
3110052M02Rik	173.387	189.553	200.859	194.499	181.899	165.951	-0.0573913	0.783544	0.999927	187.933	180.783
3110056K07Rik	118.254	100.7	118.087	130.845	148.729	121.469	0.244383	0.311175	0.999927	112.347	133.681
3110057O12Rik	83.8967	90.0376	122.502	75.1474	88.8095	59.8791	-0.399899	0.14932	0.999927	98.812	74.612
3110062M04Rik	19.9754	16.5859	18.7615	25.6385	20.3299	22.2408	0.296517	0.581887	0.999927	18.4409	22.7364
3110070M22Rik	2.39705	1.18471	6.62171	0.884087	2.13999	1.71083	-0.877819	0.547418	NA	3.40115	1.5783
3110079O15Rik	0	0	1.10362	0.884087	1.06999	0	0.733263	0.798818	NA	0.367873	0.65136
3110082I17Rik	43.9459	39.0953	23.176	50.393	24.6099	23.0962	-0.0968533	0.843677	0.999927	35.4057	32.6997
3110099E03Rik	50.338	39.0953	75.046	16.7977	10.6999	41.0599	-1.2949	0.0108211	0.850679	54.8265	22.8525
3200001D21Rik	11.9852	3.55412	8.82895	8.84087	12.8399	9.40957	0.344498	0.667929	0.999927	8.12277	10.3635
3300002I08Rik	22.3725	14.2165	15.4507	20.334	11.7699	15.3975	-0.138265	0.824335	0.999927	17.3465	15.8338
3300005D01Rik	0.799017	0	1.10362	0	0	0.855415	-0.960274	0.734328	NA	0.634212	0.285138
3632451O06Rik	27.1666	39.0953	30.9013	28.2908	9.62994	10.265	-1.00106	0.092754	0.999927	32.3877	16.0619
3632454L22Rik	4.7941	7.10823	4.41447	7.95678	8.55995	5.13249	0.380277	0.676492	0.999927	5.43894	7.21641
3830403N18Rik	1.59803	0	0	1.76817	0	0.855415	0.668471	0.789301	NA	0.532678	0.87453
3830406C13Rik	340.381	341.195	499.939	330.649	451.537	355.853	-0.0315414	0.856379	0.999927	393.838	379.346
3830408C21Rik	2.39705	2.36941	6.62171	3.53635	1.06999	2.56625	-0.475701	0.724438	NA	3.79606	2.39086
3830432H09Rik	1.59803	3.55412	3.31085	4.42044	5.34997	3.42166	0.660245	0.613882	NA	2.821	4.39735
3930402G23Rik	0	1.18471	1.10362	2.65226	2.13999	0.855415	1.46036	0.504361	NA	0.762775	1.88255
4430402I18Rik	4.7941	5.92353	4.41447	7.0727	10.6999	3.42166	0.386649	0.690011	0.999927	5.04403	7.06476
4631405J19Rik	66.3184	69.8976	177.683	116.699	83.4595	91.5294	0.0787245	0.808781	0.999927	104.633	97.2295
4632404H12Rik	62.3233	73.4517	66.2171	83.9883	102.719	81.2645	0.40581	0.181929	0.999927	67.3307	89.324
4632415L05Rik	94.284	90.0376	90.4967	114.047	121.979	111.204	0.334351	0.211521	0.999927	91.6061	115.743
4632427E13Rik	39.9508	33.1718	46.352	65.4224	50.2897	52.1803	0.499108	0.172709	0.999927	39.8249	55.9642
4632428C04Rik	9.5882	5.92353	3.31085	4.42044	3.20998	11.1204	-0.079298	0.93564	0.999927	6.27419	6.25027
4632428N05Rik	386.724	305.654	258.247	258.153	269.638	357.564	-0.107196	0.557684	0.999927	316.875	295.118
4732416N19Rik	5.59312	0	1.10362	3.53635	2.13999	0	-0.683884	0.775173	NA	2.23224	1.89211
4732471J01Rik	42.3479	42.6494	64.0099	62.7702	70.6196	46.1924	0.279277	0.428795	0.999927	49.669	59.8607
4732490B19Rik	12.7843	10.6623	15.4507	21.2181	14.9799	19.6746	0.537526	0.411538	0.999927	12.9658	18.6242
4732491K20Rik	31.1616	31.987	38.6266	48.6248	53.4997	41.0599	0.490766	0.225841	0.999927	33.9251	47.7281
4831440E17Rik	80.7007	80.56	155.61	105.206	140.169	142.854	0.370952	0.207032	0.999927	105.624	129.41
4833411C07Rik	2.39705	2.36941	3.31085	3.53635	1.06999	4.27708	0.112152	0.943584	NA	2.69244	2.96114
4833417C18Rik	7.19115	0	9.93256	1.76817	11.7699	5.98791	0.403708	0.731756	0.999927	5.7079	6.50867
4833418N02Rik	69.5144	41.4647	77.2533	61.8861	71.6896	65.0116	0.0860993	0.811401	0.999927	62.7441	66.1957
4833419F23Rik	20.7744	17.7706	16.5543	24.7544	25.6798	21.3854	0.373806	0.516976	0.999927	18.3664	23.9399
4833420G17Rik	453.841	394.507	622.441	469.45	566.027	510.683	0.0981466	0.540589	0.999927	490.263	515.387
4833422C13Rik	7.19115	7.10823	8.82895	10.609	12.8399	7.69874	0.417584	0.613865	0.999927	7.70944	10.3826
4833422M21Rik	3.19607	2.36941	4.41447	7.0727	7.48996	1.71083	0.538242	0.651599	NA	3.32665	5.42449
4833423E24Rik	307.621	194.292	813.367	720.531	145.519	140.288	-0.234974	0.736177	0.999927	438.427	335.446
4833439L19Rik	5251.14	5982.76	4352.67	2925.44	5996.24	5471.24	-0.109717	0.559089	0.999927	5195.52	4797.64
4921504A21Rik	0	1.18471	1.10362	2.65226	3.20998	4.27708	2.30164	0.19076	NA	0.762775	3.37977
4921506M07Rik	13.5833	7.10823	25.3832	22.9863	10.6999	12.8312	0.145928	0.82285	0.999927	15.3582	15.5058
4921507L20Rik	7.19115	4.73882	17.6579	14.1454	11.7699	10.265	0.47758	0.533996	0.999927	9.86262	12.0601
4921507P07Rik	7.99017	4.73882	20.9687	10.609	13.9099	6.84332	0.0705077	0.925702	0.999927	11.2326	10.4541
4921511C10Rik	4.7941	2.36941	6.62171	9.72496	8.55995	9.40957	1.05436	0.242111	0.999927	4.59507	9.23149
4921511I17Rik	3.99508	1.18471	4.41447	1.76817	1.06999	5.13249	-0.362801	0.790964	NA	3.19809	2.65689
4921513I03Rik	1.59803	1.18471	1.10362	1.76817	3.20998	3.42166	1.09544	0.503415	NA	1.29545	2.79994
4921518K17Rik	3.99508	1.18471	18.7615	4.42044	2.13999	1.71083	-0.934274	0.431383	NA	7.98043	2.75708
4921524J17Rik	116.656	120.84	150.092	134.381	133.749	136.866	0.0734096	0.763481	0.999927	129.196	134.999
4921525O09Rik	0.799017	0	0	0	0	0	-1.04737	0.714662	NA	0.266339	0
4921531C22Rik	73.5095	78.1906	97.1184	84.8724	98.4394	71.8549	0.0389945	0.898649	0.999927	82.9395	85.0556
4921536K21Rik	2.39705	4.73882	3.31085	8.84087	2.13999	3.42166	0.367514	0.788534	NA	3.48224	4.80084
4930402H24Rik	732.698	681.206	978.909	738.213	859.205	792.115	0.0178226	0.901221	0.999927	797.604	796.511
4930404I05Rik	18.3774	26.0635	44.1447	36.2476	33.1698	33.3612	0.319089	0.469637	0.999927	29.5285	34.2595
4930404N11Rik	22.3725	28.4329	9.93256	20.334	13.9099	37.6383	0.260985	0.633152	0.999927	20.246	23.9607
4930405A10Rik	6.39213	1.18471	1.10362	1.76817	3.20998	0.855415	-0.547698	0.745096	NA	2.89349	1.94452
4930405A21Rik	6.39213	7.10823	2.20724	5.30452	7.48996	6.84332	0.43589	0.655674	0.999927	5.23587	6.54593
4930405J17Rik	12.7843	14.2165	22.0724	16.7977	25.6798	18.8191	0.361684	0.537636	0.999927	16.3577	20.4322
4930405O22Rik	14.3823	7.10823	23.176	28.2908	18.1899	21.3854	0.694571	0.26333	0.999927	14.8888	22.622
4930412C18Rik	14.3823	16.5859	22.0724	9.72496	19.2599	13.6866	-0.298353	0.62906	0.999927	17.6802	14.2238
4930413F20Rik	19.1764	14.2165	22.0724	13.2613	25.6798	19.6746	0.0763159	0.895152	0.999927	18.4884	19.5386
4930413G21Rik	0.799017	1.18471	3.31085	0	2.13999	3.42166	0.137031	0.946866	NA	1.76486	1.85388
4930414N06Rik	3.99508	5.92353	9.93256	1.76817	5.34997	3.42166	-0.842952	0.430587	0.999927	6.61706	3.51327
4930415F15Rik	0.799017	2.36941	4.41447	2.65226	3.20998	0.855415	-0.0686571	0.962969	NA	2.52763	2.23922
4930415O20Rik	19.1764	22.5094	18.7615	21.2181	18.1899	25.6625	0.106495	0.848807	0.999927	20.1491	21.6901
4930426D05Rik	1.59803	0	2.20724	0	0	0	-2.67635	0.286103	NA	1.26842	0
4930426L09Rik	0.799017	1.18471	0	0.884087	1.06999	0.855415	0.662422	0.776879	NA	0.661241	0.936499
4930427A07Rik	65.5194	54.4965	64.0099	92.8291	52.4297	70.9995	0.234051	0.506925	0.999927	61.3419	72.0861
4930429B21Rik	2.39705	2.36941	2.20724	6.18861	2.13999	1.71083	0.489278	0.72156	NA	2.32457	3.34648
4930429F24Rik	7.99017	13.0318	5.51809	7.95678	10.6999	7.69874	0.0316085	0.968926	0.999927	8.84667	8.78515
4930430F08Rik	41.5489	50.9423	61.8026	53.0452	51.3597	53.8912	0.056203	0.880159	0.999927	51.4313	52.7654
4930431P03Rik	0	0	1.10362	4.42044	0	2.56625	2.83365	0.205062	NA	0.367873	2.32889
4930432K21Rik	8.78918	1.18471	7.72533	6.18861	18.1899	7.69874	0.819788	0.403508	0.999927	5.89974	10.6924
4930438E09Rik	0	0	2.20724	0	4.27997	1.71083	2.15492	0.337332	NA	0.735745	1.99694
4930443O20Rik	10.3872	5.92353	9.93256	12.3772	24.6099	5.13249	0.50503	0.527418	0.999927	8.74777	14.0399
4930444F02Rik	0.799017	1.18471	4.41447	3.53635	9.62994	3.42166	1.66311	0.215935	NA	2.13273	5.52932
4930445N18Rik	0	2.36941	2.20724	3.53635	2.13999	0.855415	0.577703	0.735628	NA	1.52555	2.17725
4930447A16Rik	11.1862	9.47764	25.3832	29.1749	26.7498	26.5179	0.981734	0.115556	0.999927	15.349	27.4809
4930447C04Rik	3.99508	2.36941	2.20724	4.42044	4.27997	1.71083	0.202615	0.879037	NA	2.85724	3.47041
4930447M23Rik	0	0	1.10362	0.884087	0	1.71083	1.38838	0.610751	NA	0.367873	0.864973
4930448I18Rik	0.799017	0	3.31085	0.884087	0	2.56625	0.191372	0.940236	NA	1.36996	1.15011
4930449E18Rik	1.59803	1.18471	4.41447	2.65226	5.34997	1.71083	0.536366	0.732442	NA	2.39907	3.23769
4930451G09Rik	23.1715	23.6941	25.3832	38.0157	28.8898	37.6383	0.543776	0.260488	0.999927	24.0829	34.8479
4930452B06Rik	85.4948	55.6812	102.636	68.9588	13.9099	20.53	-1.23808	0.0104982	0.838823	81.2708	34.4662
4930453N24Rik	465.827	535.487	555.12	621.513	608.826	460.213	0.109152	0.478766	0.999927	518.811	563.518
4930455C13Rik	5.59312	3.55412	11.0362	7.0727	18.1899	7.69874	0.780782	0.354412	0.999927	6.72781	10.9871
4930455G09Rik	6.39213	5.92353	7.72533	4.42044	3.20998	3.42166	-0.883215	0.453214	NA	6.68033	3.68403
4930455H04Rik	3.99508	4.73882	6.62171	4.42044	5.34997	5.13249	0.00205573	0.99842	0.999927	5.11854	4.96763
4930471G03Rik	3.19607	1.18471	1.10362	0	2.13999	4.27708	0.128399	0.945406	NA	1.82813	2.13902
4930473A02Rik	14.3823	10.6623	7.72533	5.30452	9.62994	9.40957	-0.410297	0.614508	0.999927	10.9233	8.11468
4930474G06Rik	0.799017	2.36941	1.10362	0.884087	2.13999	1.71083	0.166396	0.924722	NA	1.42402	1.5783
4930474M22Rik	4.7941	0	4.41447	4.42044	4.27997	0.855415	-0.143112	0.929822	NA	3.06952	3.18528
4930478L05Rik	3.19607	0	2.20724	6.18861	4.27997	3.42166	1.33714	0.316087	NA	1.8011	4.63008
4930479D17Rik	1.59803	3.55412	3.31085	1.76817	2.13999	0.855415	-0.849306	0.592738	NA	2.821	1.58786
4930480K23Rik	60.7253	39.0953	66.2171	53.9293	54.5697	49.6141	-0.0629906	0.861869	0.999927	55.3459	52.7044
4930481A15Rik	59.1272	86.4835	97.1184	46.8566	80.2495	57.3128	-0.383288	0.258227	0.999927	80.9097	61.473
4930482G09Rik	1.59803	2.36941	3.31085	4.42044	1.06999	3.42166	0.367844	0.812195	NA	2.4261	2.9707
4930483J18Rik	0.799017	0	1.10362	0	1.06999	1.71083	0.539632	0.833742	NA	0.634212	0.926941
4930483K19Rik	3.19607	1.18471	1.10362	3.53635	1.06999	5.98791	0.845126	0.554358	NA	1.82813	3.53142
4930483O08Rik	0.799017	0	3.31085	0.884087	1.06999	0	-0.72723	0.781328	NA	1.36996	0.65136
4930486L24Rik	9.5882	5.92353	3.31085	9.72496	6.41996	3.42166	0.0909801	0.930743	0.999927	6.27419	6.52219
4930487H11Rik	3.19607	0	2.20724	2.65226	1.06999	0.855415	-0.295133	0.854895	NA	1.8011	1.52589
4930488L21Rik	0	0	2.20724	1.76817	2.13999	1.71083	2.12995	0.307105	NA	0.735745	1.873
4930502E09Rik	3.19607	5.92353	6.62171	1.76817	6.41996	4.27708	-0.313448	0.779255	NA	5.2471	4.15507
4930503B20Rik	3.99508	3.55412	6.62171	5.30452	3.20998	0.855415	-0.699028	0.580072	NA	4.72364	3.12331
4930503L19Rik	27.1666	22.5094	26.4868	21.2181	13.9099	28.2287	-0.288689	0.578674	0.999927	25.3876	21.1189
4930506C21Rik	20.7744	13.0318	26.4868	18.5658	49.2197	28.2287	0.675261	0.213904	0.999927	20.0977	32.0047
4930507D05Rik	1.59803	5.92353	6.62171	6.18861	4.27997	4.27708	0.0873712	0.935091	0.999927	4.71442	4.91522
4930509E16Rik	2.39705	1.18471	3.31085	2.65226	2.13999	0.855415	-0.329396	0.828534	NA	2.29754	1.88255
4930511A08Rik	15.1813	15.4012	26.4868	23.8703	22.4699	22.2408	0.319139	0.573248	0.999927	19.0231	22.8603
4930512B01Rik	13.5833	11.8471	24.2796	22.9863	21.3999	16.2529	0.352397	0.573101	0.999927	16.57	20.213
4930512J16Rik	1.59803	0	4.41447	1.76817	4.27997	1.71083	0.694595	0.667764	NA	2.00417	2.58633
4930513N10Rik	11.1862	5.92353	5.51809	4.42044	6.41996	7.69874	-0.274155	0.780695	0.999927	7.54262	6.17971
4930515G01Rik	11.1862	5.92353	8.82895	16.7977	14.9799	11.9758	0.735226	0.337453	0.999927	8.64624	14.5845
4930519G04Rik	2.39705	0	3.31085	3.53635	8.55995	0.855415	0.96498	0.546131	NA	1.90263	4.31724
4930519K11Rik	0.799017	3.55412	3.31085	1.76817	0	3.42166	-0.634981	0.700754	NA	2.55466	1.72995
4930520O04Rik	3.99508	2.36941	6.62171	7.0727	1.06999	0	-0.873162	0.512597	NA	4.32873	2.71423
4930521E06Rik	3.19607	1.18471	0	2.65226	3.20998	2.56625	1.3777	0.429616	NA	1.46026	2.8095
4930523C07Rik	165.396	140.98	162.232	131.729	150.869	143.71	-0.138482	0.564025	0.999927	156.203	142.103
4930525G20Rik	27.9656	17.7706	32.0049	26.5226	23.5399	23.0962	-0.072971	0.887685	0.999927	25.9137	24.3862
4930526I15Rik	16.7793	11.8471	8.82895	15.0295	3.20998	11.9758	-0.315523	0.683824	0.999927	12.4851	10.0718
4930527F14Rik	0	1.18471	6.62171	1.76817	1.06999	5.13249	0.798258	0.661258	NA	2.60214	2.65689
4930528A17Rik	3.99508	2.36941	0	0.884087	1.06999	1.71083	-0.381842	0.820688	NA	2.1215	1.22164
4930533B01Rik	14.3823	10.6623	26.4868	17.6817	26.7498	16.2529	0.302238	0.596983	0.999927	17.1772	20.2282
4930538K18Rik	2.39705	2.36941	3.31085	1.76817	6.41996	1.71083	0.176024	0.910064	NA	2.69244	3.29966
4930539E08Rik	1.59803	2.36941	0	0	3.20998	1.71083	0.817832	0.715266	NA	1.32248	1.64027
4930539J05Rik	11.1862	7.10823	16.5543	7.0727	8.55995	11.9758	-0.277951	0.743574	0.999927	11.6162	9.20282
4930544D05Rik	1.59803	0	3.31085	0.884087	2.13999	3.42166	0.499575	0.798722	NA	1.6363	2.14858
4930545L23Rik	3.99508	2.36941	3.31085	5.30452	4.27997	0.855415	-0.088896	0.947866	NA	3.22512	3.47997
4930546K05Rik	0	3.55412	2.20724	0.884087	0	0.855415	-1.73794	0.483944	NA	1.92045	0.579834
4930547E08Rik	0.799017	0	1.10362	0	2.13999	1.71083	1.00971	0.662615	NA	0.634212	1.28361
4930548H24Rik	0	1.18471	0	0.884087	5.34997	0	1.99529	0.476911	NA	0.394902	2.07802
4930549C15Rik	5.59312	1.18471	2.20724	0	1.06999	0.855415	-2.18595	0.302481	NA	2.99502	0.641803
4930549G23Rik	5.59312	3.55412	6.62171	5.30452	11.7699	9.40957	0.751944	0.434995	0.999927	5.25631	8.82801
4930550C14Rik	3.19607	2.36941	8.82895	3.53635	3.20998	4.27708	-0.150618	0.903911	NA	4.79814	3.67447
4930552P12Rik	4.7941	1.18471	3.31085	2.65226	5.34997	5.13249	0.463585	0.723468	NA	3.09655	4.37824
4930554I06Rik	0.799017	0	1.10362	0.884087	5.34997	1.71083	2.01877	0.326312	NA	0.634212	2.6483
4930556M19Rik	39.1518	37.9106	46.352	22.1022	51.3597	38.4937	-0.137876	0.758937	0.999927	41.1381	37.3185
4930556N13Rik	3.99508	3.55412	6.62171	7.0727	8.55995	8.55415	0.818132	0.37624	0.999927	4.72364	8.06227
4930557A04Rik	6.39213	1.18471	2.20724	6.18861	5.34997	1.71083	0.33246	0.800056	NA	3.26136	4.41647
4930557K07Rik	7.19115	5.92353	5.51809	8.84087	8.55995	6.84332	0.373359	0.666033	0.999927	6.21092	8.08138
4930558J18Rik	2.39705	0	1.10362	0	0	0	-2.65368	0.368949	NA	1.16689	0
4930562C15Rik	15.9803	7.10823	13.2434	13.2613	18.1899	17.1083	0.401506	0.55243	0.999927	12.1107	16.1865
4930562F07Rik	1.59803	0	3.31085	0.884087	2.13999	0.855415	-0.117824	0.951983	NA	1.6363	1.29316
4930563D23Rik	3.99508	1.18471	5.51809	7.95678	3.20998	5.98791	0.766859	0.533108	NA	3.56596	5.71822
4930563E18Rik	1.59803	0	1.10362	2.65226	0	0.855415	0.332877	0.873254	NA	0.90055	1.16923
4930563E22Rik	3.99508	3.55412	13.2434	7.95678	14.9799	10.265	0.913738	0.277937	0.999927	6.93087	11.0672
4930563F08Rik	22.3725	11.8471	34.2122	20.334	24.6099	27.3733	0.145885	0.787628	0.999927	22.8106	24.1057
4930563M21Rik	0.799017	3.55412	1.10362	0.884087	1.06999	1.71083	-0.450373	0.811675	NA	1.81892	1.22164
4930564C03Rik	3.19607	2.36941	2.20724	0	1.06999	0.855415	-2.05565	0.26874	NA	2.5909	0.641803
4930565N06Rik	73.5095	47.3882	121.398	99.0177	116.629	74.4211	0.314671	0.272121	0.999927	80.7653	96.6894
4930570G19Rik	6.39213	7.10823	2.20724	4.42044	6.41996	4.27708	0.0612674	0.954857	NA	5.23587	5.03916
4930577N17Rik	11.9852	10.6623	13.2434	12.3772	21.3999	12.8312	0.358276	0.600888	0.999927	11.9637	15.5361
4930578C19Rik	3.19607	7.10823	5.51809	4.42044	4.27997	8.55415	0.097243	0.921134	0.999927	5.27413	5.75152
4930578M01Rik	3.99508	1.18471	4.41447	3.53635	6.41996	2.56625	0.345	0.781054	NA	3.19809	4.17419
4930579G18Rik	20.7744	21.3247	46.352	45.0884	47.0797	32.5058	0.581682	0.181662	0.999927	29.4837	41.558
4930579G24Rik	11.9852	13.0318	11.0362	7.95678	8.55995	14.5421	-0.242112	0.734204	0.999927	12.0177	10.3529
4930579H20Rik	6.39213	0	12.1398	7.0727	6.41996	6.84332	0.387923	0.729028	0.999927	6.17731	6.77866
4930579K19Rik	3.99508	2.36941	4.41447	4.42044	4.27997	5.98791	0.455585	0.680652	NA	3.59299	4.89611
4930581F22Rik	101.475	81.7447	145.678	174.165	130.539	106.071	0.35049	0.182544	0.999927	109.632	136.925
4930583K01Rik	2.39705	0	1.10362	1.76817	1.06999	0.855415	0.0359236	0.989093	NA	1.16689	1.23119
4930590J08Rik	5.59312	4.73882	9.93256	0	6.41996	2.56625	-1.17689	0.386983	NA	6.75483	2.9954
4930592I03Rik	12.7843	24.8788	15.4507	22.1022	32.0998	21.3854	0.534579	0.337053	0.999927	17.7046	25.1958
4930593A02Rik	3.99508	2.36941	0	2.65226	4.27997	2.56625	1.13875	0.486321	NA	2.1215	3.16616
4930594C11Rik	72.7105	62.7894	177.683	130.845	143.379	111.204	0.458503	0.0928798	0.999927	104.394	128.476
4930595D18Rik	5.59312	0	2.20724	8.84087	7.48996	4.27708	1.32925	0.286129	NA	2.60012	6.8693
4930596I21Rik	10.3872	3.55412	11.0362	9.72496	14.9799	11.9758	0.567115	0.463228	0.999927	8.32584	12.2269
4930597G03Rik	7.99017	5.92353	2.20724	13.2613	1.06999	12.8312	0.796895	0.419346	0.999927	5.37364	9.05418
4930599N23Rik	5.59312	3.55412	5.51809	6.18861	3.20998	2.56625	-0.310627	0.779067	NA	4.88844	3.98828
4931402G19Rik	2.39705	2.36941	3.31085	0	6.41996	2.56625	0.184347	0.905501	NA	2.69244	2.9954
4931403E22Rik	6.39213	4.73882	7.72533	6.18861	6.41996	6.84332	0.0655562	0.944465	0.999927	6.28543	6.48396
4931403G20Rik	14.3823	13.0318	23.176	26.5226	18.1899	20.53	0.429172	0.467279	0.999927	16.8633	21.7475
4931406C07Rik	781.438	1076.9	916.003	550.786	1053.94	961.487	-0.113187	0.601734	0.999927	924.78	855.406
4931406H21Rik	128.642	77.0059	164.439	122.004	224.699	182.203	0.534879	0.104099	0.999927	123.362	176.302
4931406P16Rik	557.714	624.34	645.617	550.786	691.216	654.393	0.0563868	0.719238	0.999927	609.223	632.132
4931408D14Rik	6.39213	4.73882	4.41447	3.53635	32.0998	5.98791	1.23014	0.215068	0.999927	5.18181	13.8747
4931414P19Rik	46.343	30.8023	36.4194	38.0157	33.1698	35.9274	-0.0914284	0.830566	0.999927	37.8549	35.7043
4931423N10Rik	1.59803	2.36941	3.31085	0.884087	1.06999	1.71083	-0.941466	0.590947	NA	2.4261	1.22164
4931428F04Rik	15.1813	9.47764	11.0362	19.4499	8.55995	25.6625	0.527376	0.452374	0.999927	11.8984	17.8908
4931429L15Rik	2.39705	0	0	0.884087	2.13999	1.71083	1.38856	0.607857	NA	0.799017	1.5783
4931430N09Rik	1.59803	2.36941	1.10362	4.42044	4.27997	0.855415	0.787364	0.634858	NA	1.69035	3.18528
4931431C16Rik	5.59312	4.73882	8.82895	9.72496	8.55995	8.55415	0.527038	0.566569	0.999927	6.38696	8.94635
4931440F15Rik	3.99508	0	1.10362	0.884087	2.13999	1.71083	-0.188734	0.916504	NA	1.69957	1.5783
4931440P22Rik	1.59803	0	1.10362	1.76817	3.20998	1.71083	1.23166	0.590779	NA	0.90055	2.22966
4932416H05Rik	31.9607	33.1718	48.5592	32.7112	50.2897	35.072	0.0749374	0.860974	0.999927	37.8972	39.3576
4932418E24Rik	15.9803	9.47764	19.8651	7.95678	11.7699	22.2408	-0.173462	0.810446	0.999927	15.1077	13.9892
4932435O22Rik	1.59803	2.36941	0	0.884087	1.06999	0	-0.540655	0.804635	NA	1.32248	0.65136
4932438A13Rik	2526.49	2282.93	3427.84	2818.47	3195	2623.56	0.0879281	0.428924	0.999927	2745.75	2879.01
4932438H23Rik	38.3528	24.8788	46.352	34.4794	36.3798	31.6504	-0.07889	0.855772	0.999927	36.5279	34.1698
4932441J04Rik	3.19607	1.18471	0	0.884087	1.06999	0	-0.503727	0.848655	NA	1.46026	0.65136
4933400A11Rik	2.39705	0	3.31085	0.884087	2.13999	0	-1.19551	0.554451	NA	1.90263	1.00802
4933400F21Rik	39.1518	26.0635	67.3207	47.7407	50.2897	49.6141	0.244723	0.553725	0.999927	44.1787	49.2148
4933402D24Rik	5.59312	1.18471	3.31085	4.42044	3.20998	5.98791	0.438773	0.729126	NA	3.36289	4.53944
4933404O12Rik	43.1469	42.6494	38.6266	49.5089	48.1497	46.1924	0.213886	0.597353	0.999927	41.4743	47.9503
4933406C10Rik	3.19607	7.10823	7.72533	5.30452	7.48996	5.13249	0.031432	0.973921	0.999927	6.00988	5.97566
4933406G16Rik	0	1.18471	2.20724	2.65226	3.20998	0.855415	1.4702	0.441959	NA	1.13065	2.23922
4933406I18Rik	3.19607	2.36941	2.20724	1.76817	5.34997	0.855415	-0.182037	0.90145	NA	2.5909	2.65785
4933406J10Rik	7.19115	2.36941	5.51809	2.65226	6.41996	4.27708	-0.289399	0.817887	NA	5.02622	4.44977
4933407K13Rik	19.9754	14.2165	22.0724	27.4067	31.0298	22.2408	0.51555	0.353833	0.999927	18.7547	26.8924
4933408B17Rik	11.9852	11.8471	23.176	4.42044	13.9099	11.1204	-0.601936	0.390551	0.999927	15.6694	9.81692
4933411K16Rik	8.78918	3.55412	1.10362	4.42044	7.48996	2.56625	0.253942	0.82616	NA	4.48231	4.82555
4933412E12Rik	10.3872	4.73882	12.1398	10.609	10.6999	11.9758	0.330291	0.688344	0.999927	9.08861	11.0949
4933413J09Rik	2.39705	7.10823	14.347	7.0727	13.9099	8.55415	0.545498	0.530059	0.999927	7.95077	9.84559
4933416M06Rik	2.39705	1.18471	4.41447	3.53635	3.20998	0	-0.661911	0.693268	NA	2.66541	2.24878
4933416M07Rik	4.7941	2.36941	4.41447	8.84087	4.27997	2.56625	0.375614	0.726479	0.999927	3.85933	5.22903
4933417D19Rik	7.19115	11.8471	14.347	20.334	7.48996	10.265	0.248548	0.74533	0.999927	11.1284	12.6963
4933417E11Rik	0.799017	2.36941	1.10362	0	1.06999	1.71083	-0.673501	0.740794	NA	1.42402	0.926941
4933417G07Rik	0.799017	2.36941	2.20724	0.884087	3.20998	2.56625	0.349481	0.837765	NA	1.79189	2.2201
4933417O13Rik	7.99017	3.55412	7.72533	16.7977	9.62994	7.69874	0.811512	0.37863	0.999927	6.4232	11.3754
4933421O10Rik	209.342	161.12	252.729	203.34	193.669	171.083	-0.119665	0.564032	0.999927	207.73	189.364
4933422A05Rik	0.799017	1.18471	5.51809	0.884087	1.06999	0	-1.62101	0.420843	NA	2.5006	0.65136
4933424G05Rik	15.9803	11.8471	43.0411	31.8271	34.2398	27.3733	0.599445	0.235581	0.999927	23.6228	31.1467
4933424G06Rik	0.799017	0	0	0.884087	3.20998	1.71083	2.45592	0.332535	NA	0.266339	1.93497
4933427D14Rik	121.451	122.025	151.196	118.468	169.059	130.023	0.0862232	0.716991	0.999927	131.557	139.183
4933427G17Rik	15.9803	15.4012	22.0724	15.0295	19.2599	11.9758	-0.198181	0.750604	0.999927	17.818	15.4217
4933428G20Rik	0.799017	3.55412	2.20724	1.76817	5.34997	0.855415	0.14631	0.927515	NA	2.18679	2.65785
4933430I17Rik	2.39705	1.18471	3.31085	3.53635	2.13999	0	-0.675173	0.694971	NA	2.29754	1.89211
4933431E20Rik	131.039	136.241	175.475	161.788	156.219	149.698	0.0940507	0.689459	0.999927	147.585	155.902
4933431G14Rik	11.1862	15.4012	13.2434	18.5658	22.4699	12.8312	0.410873	0.533786	0.999927	13.2769	17.9556
4933433G15Rik	11.9852	1.18471	6.62171	7.95678	4.27997	5.13249	-0.211213	0.833937	0.999927	6.59722	5.78975
4933433G19Rik	10.3872	11.8471	14.347	7.95678	8.55995	8.55415	-0.523638	0.503086	0.999927	12.1938	8.35696
4933433H22Rik	0.799017	0	0	1.76817	2.13999	1.71083	2.38976	0.271722	NA	0.266339	1.873
4933434E20Rik	731.1	799.676	762.6	851.376	763.976	649.26	-0.0239029	0.865512	0.999927	764.459	754.87
4933439C10Rik	42.3479	33.1718	45.2483	45.9725	79.1795	47.9033	0.49976	0.189662	0.999927	40.256	57.6851
4933439K11Rik	36.7548	27.2482	27.5905	28.2908	40.6598	25.6625	0.0266382	0.955997	0.999927	30.5311	31.5377
5031414D18Rik	58.3282	17.7706	14.347	22.1022	21.3999	20.53	-0.380603	0.459342	0.999927	30.1486	21.344
5031425E22Rik	243.7	212.062	301.288	282.908	257.868	260.046	0.0952871	0.610682	0.999927	252.35	266.941
5031425F14Rik	1.59803	1.18471	4.41447	1.76817	3.20998	0.855415	-0.231426	0.892107	NA	2.39907	1.94452
5031426D15Rik	26.3675	18.9553	27.5905	38.8998	34.2398	28.2287	0.471879	0.297534	0.999927	24.3044	33.7894
5031434C07Rik	2.39705	0	5.51809	4.42044	4.27997	3.42166	0.922063	0.488016	NA	2.63838	4.04069
5031434O11Rik	7.99017	3.55412	12.1398	15.0295	12.8399	17.1083	0.997973	0.181934	0.999927	7.89469	14.9926
5031439G07Rik	735.894	755.842	695.279	841.651	710.476	856.271	0.14149	0.307488	0.999927	729.005	802.799
5033403F01Rik	1.59803	3.55412	3.31085	1.76817	4.27997	2.56625	0.0297951	0.983088	NA	2.821	2.87146
5033406O09Rik	40.7498	33.1718	47.4556	53.9293	27.8198	23.0962	-0.208324	0.656413	0.999927	40.4591	34.9485
5330417C22Rik	1749.05	1666.88	1708.4	1788.51	1218.72	1521.78	-0.168423	0.286059	0.999927	1708.11	1509.67
5330426P16Rik	53.5341	63.9741	70.6316	58.3497	72.7596	56.4574	-0.00279206	0.993373	0.999927	62.7133	62.5222
5430402O13Rik	3.19607	3.55412	6.62171	2.65226	2.13999	2.56625	-0.776534	0.545926	NA	4.4573	2.45283
5430405H02Rik	15.9803	13.0318	16.5543	19.4499	17.1199	17.9637	0.258982	0.674446	0.999927	15.1888	18.1778
5430416N02Rik	28.7646	36.7259	49.6628	40.668	43.8697	32.5058	0.0590736	0.884279	0.999927	38.3844	39.0145
5430416O09Rik	7.99017	7.10823	11.0362	7.95678	18.1899	2.56625	-0.0870179	0.920481	0.999927	8.71153	9.57097
5430427O19Rik	31.9607	11.8471	12.1398	19.4499	18.1899	16.2529	-0.0160419	0.977169	0.999927	18.6492	17.9642
5430431A17Rik	5.59312	4.73882	13.2434	7.0727	7.48996	15.3975	0.439743	0.604028	0.999927	7.85845	9.98671
5430437J10Rik	1.59803	2.36941	5.51809	4.42044	7.48996	5.13249	1.00183	0.40016	NA	3.16185	5.68096
5530601H04Rik	58.3282	49.7576	87.1858	61.002	65.2696	62.4453	-0.0114457	0.972981	0.999927	65.0906	62.9056
5730405O15Rik	21.5734	20.14	11.0362	23.8703	18.1899	19.6746	0.281511	0.639247	0.999927	17.5832	20.5783
5730408K05Rik	21.5734	23.6941	14.347	18.5658	17.1199	18.8191	-0.116989	0.829124	0.999927	19.8715	18.1683
5730409E04Rik	187.769	169.413	158.921	200.688	204.369	205.3	0.242512	0.253351	0.999927	172.034	203.452
5730420D15Rik	5.59312	4.73882	12.1398	8.84087	7.48996	1.71083	-0.350541	0.724689	0.999927	7.49058	6.01389
5730422E09Rik	6.39213	1.18471	3.31085	1.76817	4.27997	1.71083	-0.561015	0.687643	NA	3.62923	2.58633
5730435O14Rik	4.7941	2.36941	8.82895	6.18861	2.13999	2.56625	-0.441427	0.729781	NA	5.33082	3.63161
5730455P16Rik	453.841	415.832	528.633	469.45	479.357	451.659	0.00873932	0.953139	0.999927	466.102	466.822
5730480H06Rik	15.1813	9.47764	19.8651	15.0295	23.5399	17.1083	0.345868	0.557349	0.999927	14.8414	18.5592
5730488B01Rik	4.7941	0	0	0	0	0.855415	-1.69975	0.517379	NA	1.59803	0.285138
5730507C01Rik	6.39213	7.10823	2.20724	13.2613	12.8399	14.5421	1.48349	0.0938845	0.999927	5.23587	13.5478
5730508B09Rik	182.176	200.215	252.729	383.694	177.619	147.131	0.132242	0.638625	0.999927	211.707	236.148
5730522E02Rik	0.799017	0	4.41447	1.76817	1.06999	1.71083	0.629691	0.770809	NA	1.73783	1.51633
5730559C18Rik	11.1862	4.73882	13.2434	17.6817	22.4699	12.8312	0.857789	0.220184	0.999927	9.72282	17.6609
5830411N06Rik	0.799017	0	0	0.884087	0	0.855415	0.708372	0.706265	0.999927	0.266339	0.579834
5830415F09Rik	86.2938	125.579	93.8075	115.815	120.909	107.782	0.181705	0.49953	0.999927	101.893	114.836
5830416I19Rik	42.3479	28.4329	55.1809	38.0157	103.789	61.5899	0.708112	0.108586	0.999927	41.9872	67.7983
5830416P10Rik	14.3823	7.10823	2.20724	2.65226	6.41996	1.71083	-0.99139	0.321076	0.999927	7.89926	3.59435
5830417I10Rik	134.235	136.241	165.543	162.672	201.159	175.36	0.315117	0.168873	0.999927	145.34	179.73
5830418P13Rik	5.59312	2.36941	1.10362	0	0	0.855415	-3.00304	0.187375	NA	3.02205	0.285138
5830428M24Rik	24.7695	23.6941	34.2122	21.2181	32.0998	17.1083	-0.247351	0.610666	0.999927	27.5586	23.4754
5830432E09Rik	12.7843	3.55412	3.31085	8.84087	5.34997	6.84332	0.160173	0.869047	0.999927	6.54975	7.01139
5830444B04Rik	17.5784	5.92353	30.9013	18.5658	19.2599	17.9637	0.214157	0.745401	0.999927	18.1344	18.5965
5830454E08Rik	14.3823	13.0318	7.72533	13.2613	16.0499	15.3975	0.37831	0.593001	0.999927	11.7131	14.9029
5930403L14Rik	3.99508	15.4012	3.31085	2.65226	16.0499	2.56625	-0.0979194	0.929617	0.999927	7.56904	7.08947
5930412G12Rik	23.1715	16.5859	40.8339	25.6385	19.2599	27.3733	-0.0662282	0.903433	0.999927	26.8637	24.0906
5930430L01Rik	45.5439	34.3565	45.2483	64.5384	73.8296	46.1924	0.534937	0.13068	0.999927	41.7163	61.5201
5930438M14Rik	3.19607	0	1.10362	0	0	0	-3.10651	0.20536	NA	1.43323	0
6030408B16Rik	0	0	0	9.72496	1.06999	4.27708	4.76507	0.0264353	NA	0	5.02401
6030419C18Rik	12.7843	11.8471	5.51809	7.0727	4.27997	9.40957	-0.504501	0.580657	0.999927	10.0498	6.92075
6030443J06Rik	35.1567	23.6941	47.4556	41.5521	41.7298	35.9274	0.19774	0.65493	0.999927	35.4355	39.7364
6030458C11Rik	440.258	386.214	455.794	416.405	462.237	365.262	-0.0479017	0.763843	0.999927	427.422	414.635
6030466F02Rik	0	1.18471	0	0.884087	4.27997	2.56625	2.82352	0.19763	NA	0.394902	2.57677
6030468B19Rik	1.59803	0	0	0.884087	0	2.56625	0.658371	0.792598	NA	0.532678	1.15011
6230400D17Rik	5.59312	8.29294	12.1398	4.42044	21.3999	7.69874	0.356017	0.646155	0.999927	8.67529	11.173
6330403A02Rik	7.19115	4.73882	9.93256	4.42044	1.06999	2.56625	-1.40589	0.213333	NA	7.28751	2.68556
6330403K07Rik	11.9852	11.8471	9.93256	6.18861	3.20998	3.42166	-1.40766	0.123161	0.999927	11.255	4.27342
6330407A03Rik	13.5833	7.10823	13.2434	12.3772	11.7699	12.8312	0.14278	0.843202	0.999927	11.3116	12.3261
6330408A02Rik	66.3184	53.3117	58.4918	38.0157	72.7596	60.7345	-0.0694831	0.856075	0.999927	59.374	57.1699
6330409D20Rik	9.5882	1.18471	1.10362	0	3.20998	4.27708	-0.414842	0.759705	NA	3.95884	2.49569
6330410L21Rik	763.061	559.181	1101.41	729.372	1279.71	976.884	0.338065	0.0734764	0.999927	807.884	995.323
6330415G19Rik	15.1813	8.29294	12.1398	20.334	22.4699	15.3975	0.681275	0.29103	0.999927	11.8714	19.4004
6330416G13Rik	51.1371	61.6047	48.5592	62.7702	33.1698	49.6141	-0.15875	0.663421	0.999927	53.767	48.518
6330418K02Rik	4.7941	8.29294	11.0362	3.53635	7.48996	6.84332	-0.382139	0.698834	0.999927	8.04107	5.95654
6330549D23Rik	17.5784	15.4012	28.6941	19.4499	21.3999	17.1083	-0.0468006	0.934419	0.999927	20.5579	19.3194
6430531B16Rik	4.7941	3.55412	5.51809	1.76817	4.27997	2.56625	-0.694094	0.601543	NA	4.6221	2.87146
6430548M08Rik	3556.42	4364.46	2962.11	3377.21	3676.5	4537.98	0.100911	0.350918	0.999927	3627.66	3863.9
6430550D23Rik	11.1862	8.29294	20.9687	15.9136	28.8898	15.3975	0.632481	0.308487	0.999927	13.4826	20.067
6430562O15Rik	1.59803	3.55412	5.51809	4.42044	6.41996	2.56625	0.462062	0.728206	NA	3.55675	4.46888
6430571L13Rik	20.7744	15.4012	18.7615	20.334	34.2398	27.3733	0.568524	0.332971	0.999927	18.3124	27.3157
6430573F11Rik	106.269	123.209	134.641	114.047	125.189	124.891	0.00626527	0.980532	0.999927	121.373	121.376
6430584L05Rik	3.19607	1.18471	0	0	0	1.71083	-1.30458	0.649133	NA	1.46026	0.570277
6530402F18Rik	40.7498	21.3247	22.0724	40.668	37.4498	37.6383	0.459386	0.332345	0.999927	28.049	38.5854
6530403H02Rik	2.39705	1.18471	2.20724	0	0	0	-3.49636	0.100403	NA	1.92966	0
6720489N17Rik	15.1813	20.14	17.6579	11.4931	13.9099	9.40957	-0.630906	0.332479	0.999927	17.6597	11.6042
6820408C15Rik	17.5784	8.29294	28.6941	38.0157	26.7498	15.3975	0.609322	0.294687	0.999927	18.1885	26.721
6820431F20Rik	25.5685	27.2482	29.7977	40.668	26.7498	26.5179	0.196059	0.674627	0.999927	27.5382	31.3119
7420701I03Rik	2.39705	1.18471	2.20724	2.65226	3.20998	1.71083	0.359167	0.845585	NA	1.92966	2.52436
8030423F21Rik	0	0	1.10362	7.0727	0	0.855415	3.1127	0.217127	NA	0.367873	2.6427
8030462N17Rik	429.072	440.71	475.659	411.1	492.197	402.901	-0.0443571	0.779616	0.999927	448.481	435.399
8430408G22Rik	8.78918	21.3247	9.93256	8.84087	19.2599	11.1204	-0.0219794	0.975194	0.999927	13.3488	13.0737
8430419L09Rik	1200.92	1204.85	1284.61	1202.36	1378.15	1387.48	0.108875	0.422381	0.999927	1230.13	1322.66
8430426J06Rik	4.7941	3.55412	2.20724	3.53635	2.13999	5.13249	0.032428	0.980378	NA	3.51848	3.60294
8430429K09Rik	38.3528	33.1718	41.9375	49.5089	43.8697	31.6504	0.122534	0.769483	0.999927	37.8207	41.6763
8430431K14Rik	4.7941	0	5.51809	11.4931	13.9099	11.1204	1.87062	0.0632348	0.999927	3.4374	12.1745
8430436N08Rik	6.39213	5.92353	5.51809	1.76817	5.34997	3.42166	-0.792144	0.513504	NA	5.94458	3.51327
9030025P20Rik	14.3823	18.9553	18.7615	22.1022	29.9598	14.5421	0.316347	0.585547	0.999927	17.3664	22.2014
9030404E10Rik	0	0	0	0	1.06999	0.855415	1.80716	0.516641	NA	0	0.641803
9030612E09Rik	0.799017	2.36941	2.20724	0.884087	1.06999	0.855415	-0.881997	0.64518	NA	1.79189	0.936499
9030617O03Rik	308.42	254.712	268.179	224.558	252.519	229.251	-0.239227	0.204883	0.999927	277.104	235.443
9030624G23Rik	7.99017	3.55412	4.41447	4.42044	4.27997	4.27708	-0.308593	0.78469	NA	5.31959	4.32583
9030624J02Rik	541.733	524.825	538.566	425.246	490.057	586.815	-0.102241	0.517612	0.999927	535.041	500.706
9130008F23Rik	91.8869	74.6364	98.222	101.67	143.379	171.083	0.647811	0.0312875	0.999927	88.2485	138.711
9130011E15Rik	170.191	156.381	188.719	198.035	199.019	180.493	0.165946	0.428729	0.999927	171.763	192.516
9130019O22Rik	56.7302	67.5282	57.3881	50.393	73.8296	71.8549	0.110269	0.747041	0.999927	60.5488	65.3591
9130019P16Rik	7.19115	5.92353	12.1398	13.2613	10.6999	8.55415	0.419252	0.604197	0.999927	8.41816	10.8385
9130023H24Rik	135.034	146.903	158.921	171.513	175.479	136.011	0.128254	0.572217	0.999927	146.953	161.001
9130024F11Rik	1.59803	0	4.41447	0.884087	0	0.855415	-1.29163	0.646181	NA	2.00417	0.579834
9130221H12Rik	58.3282	39.0953	57.3881	48.6248	65.2696	72.7103	0.261107	0.477133	0.999927	51.6039	62.2016
9130230L23Rik	285.249	300.915	364.194	426.13	276.058	309.66	0.111359	0.613378	0.999927	316.786	337.283
9130401M01Rik	191.764	213.247	146.781	200.688	148.729	174.505	-0.0598837	0.790113	0.999927	183.931	174.641
9130409I23Rik	7.19115	3.55412	2.20724	10.609	9.62994	2.56625	0.733445	0.525036	NA	4.3175	7.60174
9230110C19Rik	19.9754	20.14	29.7977	13.2613	12.8399	14.5421	-0.749953	0.193941	0.999927	23.3044	13.5478
9230112J17Rik	5.59312	5.92353	5.51809	5.30452	8.55995	2.56625	-0.16115	0.872919	0.999927	5.67825	5.47691
9230114K14Rik	31.1616	29.6176	22.0724	52.1611	46.0097	29.0841	0.589718	0.209104	0.999927	27.6172	42.4183
9230116L04Rik	3.99508	7.10823	12.1398	7.95678	4.27997	2.56625	-0.599927	0.558596	0.999927	7.74771	4.93433
9230116N13Rik	7.99017	5.92353	8.82895	7.0727	8.55995	8.55415	0.0975789	0.904776	0.999927	7.58088	8.06227
9230117E06Rik	3.99508	3.55412	4.41447	5.30452	6.41996	2.56625	0.186916	0.866951	NA	3.98789	4.76358
9330020H09Rik	43.1469	34.3565	25.3832	37.1317	36.3798	22.2408	-0.110109	0.814298	0.999927	34.2955	31.9174
9330102E08Rik	12.7843	14.2165	18.7615	16.7977	17.1199	6.84332	-0.196316	0.774093	0.999927	15.2541	13.587
9330133O14Rik	20.7744	13.0318	24.2796	25.6385	21.3999	19.6746	0.208842	0.690238	0.999927	19.3619	22.2376
9330136K24Rik	10.3872	13.0318	20.9687	17.6817	29.9598	26.5179	0.801839	0.183911	0.999927	14.7959	24.7198
9330151L19Rik	131.838	101.885	206.377	204.224	217.209	157.396	0.440431	0.0651132	0.999927	146.7	192.943
9330159F19Rik	39.1518	71.0823	30.9013	38.8998	40.6598	38.4937	-0.204321	0.631216	0.999927	47.0452	39.3511
9330159M07Rik	10.3872	5.92353	8.82895	9.72496	9.62994	6.84332	0.0360151	0.965528	0.999927	8.3799	8.73274
9330162012Rik	63.9213	63.9741	75.046	59.2338	55.6397	72.7103	-0.110744	0.739167	0.999927	67.6472	62.5279
9330162B11Rik	55.1321	49.7576	174.372	142.338	117.699	69.2886	0.454831	0.127721	0.999927	93.0872	109.775
9330175E14Rik	25.5685	4.73882	14.347	17.6817	14.9799	25.6625	0.347864	0.604244	0.999927	14.8848	19.4414
9330179D12Rik	2.39705	0	2.20724	0.884087	2.13999	1.71083	0.0844505	0.963354	NA	1.53476	1.5783
9330182L06Rik	3.99508	7.10823	9.93256	14.1454	5.34997	0	-0.325589	0.781426	0.999927	7.01196	6.49845
9330188P03Rik	2.39705	3.55412	3.31085	2.65226	6.41996	0.855415	-0.106031	0.939411	NA	3.08734	3.30921
9430015G10Rik	69.5144	72.267	67.3207	74.2633	78.1095	60.7345	0.0186594	0.951175	0.999927	69.7007	71.0358
9430016H08Rik	115.058	136.241	114.776	140.57	102.719	115.481	-0.0355192	0.88943	0.999927	122.025	119.59
9430018G01Rik	7.19115	2.36941	12.1398	7.0727	7.48996	9.40957	0.300548	0.746695	0.999927	7.23345	7.99074
9430020K01Rik	175.784	207.323	147.885	148.527	144.449	130.023	-0.324632	0.16482	0.999927	176.997	141
9430021M05Rik	1.59803	0	1.10362	0	0	0.855415	-1.56171	0.532801	NA	0.90055	0.285138
9430037G07Rik	14.3823	21.3247	16.5543	24.7544	27.8198	17.1083	0.416435	0.459459	0.999927	17.4204	23.2275
9430038I01Rik	49.539	67.5282	30.9013	59.2338	33.1698	59.8791	0.0656943	0.866631	0.999927	49.3229	50.7609
9430060I03Rik	7.19115	3.55412	6.62171	7.95678	7.48996	3.42166	0.0513801	0.96095	NA	5.78899	6.28947
9430065F17Rik	20.7744	18.9553	36.4194	20.334	19.2599	15.3975	-0.415692	0.470921	0.999927	25.383	18.3305
9430076C15Rik	3.99508	1.18471	2.20724	1.76817	6.41996	7.69874	1.00246	0.466814	NA	2.46234	5.29562
9430078K24Rik	1.59803	0	1.10362	0	3.20998	1.71083	0.873784	0.7101	NA	0.90055	1.64027
9430083A17Rik	35.9557	28.4329	52.9737	76.9156	51.3597	60.7345	0.72565	0.07211	0.999927	39.1208	63.0033
9430091E24Rik	80.7007	73.4517	110.362	89.2928	112.349	81.2645	0.107566	0.69733	0.999927	88.1714	94.3022
9530002B09Rik	113.46	220.355	122.502	99.0177	102.719	89.8186	-0.639597	0.0432055	0.999927	152.106	97.1852
9530020I12Rik	7.19115	9.47764	4.41447	4.42044	8.55995	7.69874	0.00563564	0.995368	0.999927	7.02776	6.89304
9530026P05Rik	15.9803	13.0318	9.93256	15.0295	25.6798	11.9758	0.403431	0.524438	0.999927	12.9816	17.5617
9530027J09Rik	0	3.55412	8.82895	4.42044	5.34997	1.71083	0.271656	0.834723	NA	4.12769	3.82708
9530051G07Rik	0.799017	2.36941	4.41447	0.884087	2.13999	0	-1.56352	0.469018	NA	2.52763	1.00802
9530052E02Rik	1.59803	0	2.20724	5.30452	2.13999	1.71083	1.31842	0.410351	NA	1.26842	3.05178
9530053A07Rik	1.59803	0	2.20724	0.884087	1.06999	0	-1.02987	0.67258	NA	1.26842	0.65136
9530059O14Rik	0	1.18471	0	1.76817	0	0.855415	1.04748	0.68744	NA	0.394902	0.87453
9530062K07Rik	20.7744	15.4012	18.7615	10.609	32.0998	12.8312	-0.041381	0.94876	0.999927	18.3124	18.5134
9530068E07Rik	1310.39	1583.95	1347.52	1276.62	1410.25	1357.54	-0.0701066	0.600018	0.999927	1413.95	1348.14
9530077C05Rik	7.19115	3.55412	6.62171	10.609	16.0499	5.98791	0.821233	0.321609	0.999927	5.78899	10.8823
9530080O11Rik	7.99017	10.6623	13.2434	7.0727	13.9099	7.69874	-0.147302	0.843863	0.999927	10.632	9.56045
9530082P21Rik	139.029	130.318	102.636	146.758	126.259	145.421	0.178027	0.465132	0.999927	123.994	139.479
9530091C08Rik	53.5341	37.9106	39.7303	34.4794	88.8095	47.9033	0.345748	0.423006	0.999927	43.725	57.064
9630013A20Rik	3.19607	0	3.31085	2.65226	3.20998	0	-0.633747	0.741474	NA	2.16897	1.95408
9630013K17Rik	3.19607	1.18471	2.20724	6.18861	2.13999	1.71083	0.551578	0.698642	NA	2.196	3.34648
9630028B13Rik	3.19607	2.36941	2.20724	3.53635	7.48996	5.98791	1.13674	0.354238	NA	2.5909	5.6714
9630028H03Rik	7.99017	10.6623	14.347	0.884087	6.41996	8.55415	-1.0779	0.251608	0.999927	10.9999	5.28607
9630028I04Rik	3.19607	1.18471	0	1.76817	2.13999	3.42166	1.09721	0.536737	NA	1.46026	2.44327
9830132P13Rik	2.39705	1.18471	1.10362	0	4.27997	0.855415	-0.0207617	0.991298	NA	1.56179	1.7118
9830147E19Rik	69.5144	61.6047	93.8075	129.961	96.2994	76.132	0.423008	0.148786	0.999927	74.9756	100.797
9830166K06Rik	2.39705	2.36941	6.62171	2.65226	4.27997	5.13249	0.244234	0.843728	NA	3.79606	4.02158
9930012K11Rik	21.5734	22.5094	11.0362	15.9136	14.9799	17.9637	-0.128587	0.827818	0.999927	18.373	16.2857
9930014A18Rik	166.195	140.98	231.76	121.12	201.159	135.156	-0.221777	0.360997	0.999927	179.645	152.478
9930021J03Rik	512.17	471.513	629.062	469.45	541.417	459.358	-0.124189	0.398676	0.999927	537.582	490.075
9930104L06Rik	97.48	95.9611	103.74	130.845	135.889	126.601	0.404563	0.107503	0.999927	99.0604	131.112
9930111J21Rik1	41.5489	27.2482	26.4868	16.7977	17.1199	21.3854	-0.77226	0.156076	0.999927	31.7613	18.4343
9930111J21Rik2	3.99508	1.18471	1.10362	2.65226	3.20998	2.56625	0.553056	0.71046	NA	2.09447	2.8095
A130010J15Rik	320.406	331.718	337.707	348.33	348.818	325.058	0.0496713	0.766035	0.999927	329.943	340.735
A130077B15Rik	0.799017	2.36941	0	4.42044	0	0.855415	1.0856	0.575838	NA	1.05614	1.75862
A230009B12Rik	3.99508	1.18471	1.10362	0	3.20998	3.42166	0.044901	0.980007	NA	2.09447	2.21055
A230020J21Rik	0.799017	1.18471	1.10362	0.884087	2.13999	1.71083	0.616309	0.76647	NA	1.02911	1.5783
A230046K03Rik	1060.3	893.268	1243.78	1222.69	1190.9	1017.94	0.107077	0.384792	0.999927	1065.78	1143.85
A230050P20Rik	34.3577	28.4329	20.9687	30.059	31.0298	46.1924	0.348807	0.426948	0.999927	27.9198	35.7604
A230056J06Rik	1.59803	0	2.20724	0	1.06999	0.855415	-0.8517	0.734916	NA	1.26842	0.641803
A230056P14Rik	25.5685	31.987	23.176	34.4794	32.0998	21.3854	0.105901	0.823878	0.999927	26.9105	29.3215
A230065H16Rik	1.59803	1.18471	3.31085	0	0	0.855415	-2.60501	0.246406	NA	2.0312	0.285138
A230072C01Rik	31.1616	62.7894	54.0773	43.3203	55.6397	44.4816	-0.0364868	0.928324	0.999927	49.3428	47.8138
A230072E10Rik	23.9705	23.6941	38.6266	39.7839	49.2197	44.4816	0.670532	0.108589	0.999927	28.7637	44.4951
A230103J11Rik	5.59312	7.10823	15.4507	11.4931	20.3299	17.9637	0.953537	0.196617	0.999927	9.384	16.5956
A230108P19Rik	5.59312	0	2.20724	7.0727	1.06999	0	-0.369723	0.844004	NA	2.60012	2.71423
A2m	3.19607	7.10823	3.31085	11.4931	7.48996	4.27708	0.787103	0.460125	0.999927	4.53838	7.75339
A330009N23Rik	0	2.36941	1.10362	0.884087	0	1.71083	-0.571709	0.802702	NA	1.15768	0.864973
A330023F24Rik	353.165	229.833	567.26	569.352	640.926	462.78	0.604336	0.000937302	0.29418	383.419	557.686
A330032B11Rik	5.59312	2.36941	7.72533	10.609	7.48996	7.69874	0.770792	0.393658	0.999927	5.22929	8.59925
A330033J07Rik	3.99508	2.36941	5.51809	0.884087	2.13999	4.27708	-0.730809	0.586226	NA	3.96086	2.43372
A330035P11Rik	43.9459	40.28	46.352	51.277	35.3098	38.4937	-0.0612711	0.879154	0.999927	43.526	41.6935
A330040F15Rik	0.799017	2.36941	5.51809	1.76817	2.13999	2.56625	-0.190019	0.890959	NA	2.89551	2.15814
A330041J22Rik	0.799017	2.36941	2.20724	1.76817	2.13999	0	-0.852914	0.655399	NA	1.79189	1.30272
A330048O09Rik	11.1862	15.4012	16.5543	20.334	11.7699	10.265	-0.0325843	0.963087	0.999927	14.3806	14.123
A330069E16Rik	4.7941	1.18471	0	3.53635	3.20998	4.27708	1.32013	0.363345	NA	1.99294	3.67447
A330074K22Rik	0.799017	2.36941	1.10362	0.884087	1.06999	1.71083	-0.238821	0.910793	NA	1.42402	1.22164
A330076H08Rik	0	0	1.10362	0	2.13999	1.71083	1.92725	0.469636	NA	0.367873	1.28361
A330102I10Rik	1.59803	4.73882	0	4.42044	4.27997	2.56625	1.38148	0.364387	NA	2.11229	3.75555
A3galt2	32.7597	31.987	26.4868	38.8998	29.9598	42.7708	0.293178	0.514144	0.999927	30.4112	37.2101
A430005L14Rik	184.573	248.788	140.16	163.556	109.139	165.951	-0.377268	0.113052	0.999927	191.174	146.215
A430033K04Rik	154.21	165.859	148.988	181.238	181.899	173.649	0.198644	0.365657	0.999927	156.352	178.929
A430035B10Rik	25.5685	14.2165	30.9013	23.8703	29.9598	29.9395	0.287571	0.582598	0.999927	23.5621	27.9232
A430046D13Rik	37.5538	28.4329	29.7977	33.5953	47.0797	35.9274	0.272917	0.517745	0.999927	31.9281	38.8675
A430078G23Rik	58.3282	5.92353	7.72533	4.42044	8.55995	13.6866	-1.17572	0.0914248	0.999927	23.9924	8.88901
A430078I02Rik	71.1125	31.987	52.9737	45.0884	20.3299	16.2529	-0.966054	0.0490808	0.999927	52.0244	27.2237
A430088P11Rik	8.78918	4.73882	13.2434	8.84087	13.9099	7.69874	0.224659	0.772109	0.999927	8.92381	10.1498
A430090L17Rik	12.7843	16.5859	17.6579	33.5953	25.6798	26.5179	0.901289	0.110053	0.999927	15.676	28.5977
A430093F15Rik	3.99508	0	1.10362	0.884087	1.06999	2.56625	-0.05922	0.973575	NA	1.69957	1.50678
A430105I19Rik	115.058	87.6682	84.9786	216.601	140.169	117.192	0.713951	0.0193637	0.999927	95.9017	157.987
A4galt	70.3135	56.8659	48.5592	38.8998	50.2897	57.3128	-0.261293	0.474721	0.999927	58.5795	48.8341
A4gnt	143.024	78.1906	129.123	106.09	0	8.55415	-1.74171	0.281542	0.999927	116.779	38.2149
A530006G24Rik	10.3872	3.55412	5.51809	1.76817	2.13999	9.40957	-0.806419	0.419454	0.999927	6.48647	4.43924
A530013C23Rik	12.7843	21.3247	7.72533	10.609	21.3999	23.9516	0.479905	0.447627	0.999927	13.9448	18.6535
A530016L24Rik	7.99017	65.1588	7.72533	7.0727	43.8697	3.42166	-0.609912	0.484116	0.999927	26.9581	18.1214
A530032D15Rik	59.9262	52.127	67.3207	83.1042	133.749	123.18	0.928092	0.0051502	0.610239	59.7913	113.344
A530050N04Rik	0	10.6623	0	0	32.0998	0	1.7302	0.645699	NA	3.55412	10.6999
A530053G22Rik	0.799017	10.6623	2.20724	0	4.27997	0	-2.07602	0.211785	NA	4.5562	1.42666
A530064D06Rik	3.99508	1.18471	0	1.76817	0	3.42166	0.118503	0.961604	NA	1.7266	1.72995
A530065N20Rik	0.799017	2.36941	0	0.884087	6.41996	0	1.0814	0.67475	NA	1.05614	2.43468
A530072M11Rik	27.9656	30.8023	43.0411	29.1749	41.7298	28.2287	-0.0229346	0.959387	0.999927	33.9363	33.0444
A530088E08Rik	1.59803	1.18471	1.10362	0	2.13999	0.855415	-0.403118	0.827632	NA	1.29545	0.998468
A530099J19Rik	16.7793	11.8471	3.31085	3.53635	6.41996	6.84332	-0.712078	0.387264	0.999927	10.6458	5.59988
A630001G21Rik	54.3331	10.6623	18.7615	31.8271	34.2398	23.9516	0.157984	0.763266	0.999927	27.919	30.0062
A630020A06	5.59312	2.36941	3.31085	1.76817	4.27997	0.855415	-0.861908	0.540259	NA	3.75779	2.30119
A630023P12Rik	3.99508	0	0	0.884087	0	0	-1.42078	0.607205	NA	1.33169	0.294696
A630033H20Rik	27.1666	5.92353	11.0362	11.4931	9.62994	6.84332	-0.648537	0.34308	0.999927	14.7088	9.32213
A630066F11Rik	32.7597	24.8788	36.4194	45.9725	35.3098	25.6625	0.171059	0.709817	0.999927	31.3526	35.6483
A630072M18Rik	43.1469	49.7576	58.4918	61.8861	65.2696	47.9033	0.206468	0.564732	0.999927	50.4654	58.353
A630073D07Rik	1225.69	1742.7	1646.6	1053.83	1320.37	1377.22	-0.299295	0.0701604	0.999927	1538.33	1250.47
A630075F10Rik	3.19607	8.29294	9.93256	2.65226	9.62994	6.84332	-0.103733	0.916821	0.999927	7.14052	6.37518
A630077J23Rik	0.799017	3.55412	1.10362	5.30452	7.48996	7.69874	2.01351	0.124842	NA	1.81892	6.83107
A630089N07Rik	16.7793	16.5859	33.1085	39.7839	32.0998	24.807	0.596517	0.229574	0.999927	22.1579	32.2303
A630095N17Rik	14.3823	10.6623	8.82895	10.609	13.9099	9.40957	-0.00764226	0.992379	0.999927	11.2912	11.3095
A730017C20Rik	0	3.55412	1.10362	1.76817	0	2.56625	-0.109364	0.954472	NA	1.55258	1.44481
A730017L22Rik	47.142	50.9423	76.1497	45.9725	64.1996	48.7587	-0.10289	0.775942	0.999927	58.078	52.9769
A730020E08Rik	15.9803	7.10823	17.6579	12.3772	19.2599	5.13249	-0.263825	0.712311	0.999927	13.5822	12.2565
A730020M07Rik	0.799017	1.18471	5.51809	1.76817	4.27997	1.71083	0.44737	0.779383	NA	2.5006	2.58633
A730043L09Rik	6.39213	5.92353	5.51809	4.42044	4.27997	11.9758	0.112115	0.910112	0.999927	5.94458	6.89207
A730046J19Rik	3.19607	3.55412	8.82895	6.18861	3.20998	0	-0.916366	0.437135	0.999927	5.19304	3.13286
A730056A06Rik	3.99508	1.18471	3.31085	5.30452	2.13999	1.71083	0.0609729	0.96559	NA	2.83021	3.05178
A730085K08Rik	2.39705	0	3.31085	0.884087	1.06999	1.71083	-0.510219	0.773741	NA	1.90263	1.22164
A730090N16Rik	0	7.10823	5.51809	5.30452	3.20998	4.27708	0.122843	0.929674	NA	4.20877	4.26386
A830009L08Rik	3.19607	0	0	0.884087	0	1.71083	-0.160924	0.956295	NA	1.06536	0.864973
A830010M20Rik	83.8967	74.6364	91.6003	83.9883	89.8795	69.2886	-0.045168	0.877377	0.999927	83.3778	81.0521
A830018L16Rik	92.6859	117.286	105.947	49.5089	56.7097	23.9516	-1.33745	0.000101206	0.0627245	105.306	43.3901
A830052D11Rik	2.39705	3.55412	5.51809	0.884087	5.34997	5.13249	0.0403219	0.973537	NA	3.82309	3.78885
A830080D01Rik	147.019	119.655	174.372	153.831	164.779	144.565	0.077989	0.729706	0.999927	147.015	154.392
A830082K12Rik	7.19115	10.6623	14.347	7.0727	11.7699	7.69874	-0.2657	0.756089	0.999927	10.7335	8.84712
A830082N09Rik	29.5636	31.987	37.523	30.059	51.3597	41.0599	0.310732	0.452939	0.999927	33.0246	40.8262
A930001A20Rik	5.59312	2.36941	7.72533	5.30452	7.48996	10.265	0.642165	0.515209	0.999927	5.22929	7.68649
A930003O13Rik	0.799017	1.18471	1.10362	0.884087	2.13999	0	-0.478022	0.834502	NA	1.02911	1.00802
A930004D18Rik	7.19115	9.47764	6.62171	5.30452	6.41996	8.55415	-0.203052	0.818699	0.999927	7.7635	6.75955
A930005H10Rik	34.3577	29.6176	29.7977	23.8703	40.6598	24.807	-0.0886982	0.850284	0.999927	31.2577	29.7791
A930006K02Rik	8.78918	5.92353	9.93256	4.42044	8.55995	10.265	-0.0725738	0.935244	0.999927	8.21509	7.74846
A930007I19Rik	4.7941	5.92353	8.82895	8.84087	9.62994	10.265	0.604864	0.492892	0.999927	6.51552	9.5786
A930012L18Rik	14.3823	3.55412	11.0362	13.2613	10.6999	7.69874	0.0944443	0.910427	0.999927	9.65753	10.5533
A930013F10Rik	25.5685	10.6623	37.523	35.3635	40.6598	35.072	0.662891	0.159113	0.999927	24.5846	37.0318
A930015D03Rik	28.7646	28.4329	34.2122	36.2476	27.8198	34.2166	0.11342	0.800019	0.999927	30.4699	32.7613
A930016O22Rik	5.59312	4.73882	5.51809	10.609	5.34997	8.55415	0.651041	0.536542	0.999927	5.28334	8.17106
A930017M01Rik	84.6958	112.547	60.699	145.874	131.609	101.794	0.59265	0.0602558	0.999927	85.9806	126.426
A930018P22Rik	1.59803	0	2.20724	0.884087	1.06999	2.56625	0.439523	0.859541	NA	1.26842	1.50678
A930019D19Rik	28.7646	10.6623	27.5905	33.5953	23.5399	19.6746	0.193708	0.733883	0.999927	22.3391	25.6032
A930024E05Rik	16.7793	16.5859	25.3832	25.6385	24.6099	11.9758	0.0507883	0.927613	0.999927	19.5828	20.7414
A930041C12Rik	2.39705	1.18471	6.62171	3.53635	4.27997	3.42166	0.403943	0.763426	NA	3.40115	3.74599
AA388235	7.99017	5.92353	6.62171	5.30452	17.1199	12.8312	0.765007	0.370371	0.999927	6.84513	11.7519
AA413626	1.59803	2.36941	2.20724	5.30452	4.27997	2.56625	0.904451	0.545282	NA	2.05823	4.05025
AA414768	7.19115	7.10823	9.93256	13.2613	10.6999	8.55415	0.427188	0.597934	0.999927	8.07732	10.8385
AA415398	39.1518	40.28	54.0773	36.2476	53.4997	37.6383	-0.0585168	0.881161	0.999927	44.503	42.4618
AA465934	9.5882	3.55412	7.72533	7.0727	5.34997	4.27708	-0.341183	0.730994	0.999927	6.95588	5.56658
AA467197	1.59803	0	0	3.53635	2.13999	0	1.5461	0.52651	NA	0.532678	1.89211
AA474331	22.3725	21.3247	29.7977	23.8703	22.4699	23.0962	-0.0633158	0.901775	0.999927	24.4983	23.1455
AA543186	23.9705	20.14	13.2434	11.4931	21.3999	8.55415	-0.491118	0.465881	0.999927	19.118	13.8157
AA986860	261.278	317.501	243.9	313.851	342.398	350.72	0.303295	0.0939904	0.999927	274.226	335.656
Aaas	127.044	123.209	129.123	122.888	123.049	135.156	0.00792669	0.974263	0.999927	126.459	127.031
Aacs	234.112	321.055	130.227	176.817	218.279	223.263	-0.0727207	0.757474	0.999927	228.465	206.12
Aaed1	365.151	428.863	428.204	310.315	406.598	322.492	-0.235467	0.179381	0.999927	407.406	346.468
Aagab	795.022	743.995	781.362	892.044	739.366	765.597	0.0457857	0.744211	0.999927	773.459	799.002
Aak1	1601.23	1458.37	2020.72	1777.01	2024.43	1817.76	0.159386	0.187642	0.999927	1693.44	1873.07
Aamdc	289.244	308.023	263.765	220.138	278.198	301.962	-0.10809	0.569523	0.999927	287.011	266.766
Aamp	1738.66	1848.14	1307.79	1412.77	1243.33	1815.19	-0.130095	0.28394	0.999927	1631.53	1490.43
Aanat	6.39213	0	2.20724	4.42044	2.13999	1.71083	-0.0837891	0.954026	NA	2.86646	2.75708
Aar2	397.91	437.156	341.018	430.55	359.518	418.298	0.0445015	0.789063	0.999927	392.028	402.789
Aars	1844.13	1543.67	1601.35	2559.43	1655.28	1692.87	0.254598	0.175355	0.999927	1663.05	1969.19
Aars2	95.882	135.056	55.1809	123.772	72.7596	122.324	0.218445	0.472003	0.999927	95.3731	106.285
Aarsd1	263.675	279.591	205.273	280.256	202.229	272.022	0.021501	0.913961	0.999927	249.513	251.502
Aasdh	156.607	136.241	189.822	181.238	211.859	195.035	0.295534	0.164841	0.999927	160.89	196.044
Aasdhppt	378.734	501.13	467.934	473.871	438.697	411.455	-0.0253542	0.879402	0.999927	449.266	441.341
Aass	1435.03	1544.86	2145.43	1717.78	1836.11	1673.19	0.0571509	0.631232	0.999927	1708.44	1742.36
Aatf	235.71	229.833	279.215	300.59	303.878	242.938	0.18905	0.306448	0.999927	248.253	282.469
Aatk	27.1666	41.4647	13.2434	15.9136	33.1698	37.6383	0.17064	0.750332	0.999927	27.2916	28.9072
AB124611	57.5292	24.8788	23.176	13.2613	9.62994	26.5179	-1.09656	0.0367917	0.999927	35.1947	16.4697
Abat	220.529	190.738	274.801	183.89	173.339	206.155	-0.267747	0.20919	0.999927	228.689	187.795
Abca1	1448.62	1665.7	1537.34	1202.36	1950.6	1422.56	-0.0281961	0.866188	0.999927	1550.55	1525.17
Abca13	5.59312	0	2.20724	0	1.06999	1.71083	-1.57146	0.412129	NA	2.60012	0.926941
Abca17	0.799017	4.73882	0	0.884087	2.13999	1.71083	0.453438	0.819241	NA	1.84595	1.5783
Abca2	336.386	360.15	264.868	235.167	242.889	349.865	-0.224051	0.197533	0.999927	320.468	275.974
Abca3	2185.31	2121.81	2143.23	1983.89	2040.48	2503.8	0.0134518	0.904482	0.999927	2150.11	2176.06
Abca4	7.99017	10.6623	8.82895	5.30452	5.34997	1.71083	-1.2183	0.216271	0.999927	9.16049	4.12177
Abca5	214.136	226.279	262.661	223.674	242.889	183.914	-0.112772	0.553204	0.999927	234.359	216.826
Abca6	135.833	172.967	156.714	111.395	146.589	152.264	-0.181079	0.464482	0.999927	155.171	136.749
Abca7	303.626	302.1	247.21	329.764	241.819	345.588	0.106321	0.570516	0.999927	284.312	305.724
Abca8a	965.212	1181.15	1019.74	925.639	1047.52	965.764	-0.104122	0.435796	0.999927	1055.37	979.642
Abca8b	208.543	244.049	211.895	205.992	235.399	218.986	-0.0046489	0.981117	0.999927	221.496	220.126
Abca9	491.395	606.569	486.696	375.737	514.667	473.9	-0.214425	0.221989	0.999927	528.22	454.768
Abcb10	512.17	595.907	510.975	656.877	573.517	502.129	0.0948357	0.551233	0.999927	539.684	577.507
Abcb11	7.19115	8.29294	5.51809	7.95678	7.48996	9.40957	0.25373	0.779141	0.999927	7.00073	8.28544
Abcb1a	43.1469	43.8341	37.523	19.4499	32.0998	52.1803	-0.301753	0.504701	0.999927	41.5013	34.5767
Abcb1b	35.1567	58.0506	29.7977	46.8566	47.0797	28.2287	-0.0392601	0.928411	0.999927	41.0017	40.7217
Abcb4	3.19607	16.5859	2.20724	7.0727	9.62994	1.71083	-0.144741	0.893742	0.999927	7.32973	6.13782
Abcb6	483.405	516.532	477.867	523.38	483.637	548.321	0.0778134	0.615786	0.999927	492.601	518.446
Abcb7	1070.68	1274.74	1305.58	1394.21	1337.49	1104.34	0.0645564	0.624958	0.999927	1217	1278.68
Abcb8	266.872	375.552	205.273	274.951	201.159	348.154	-0.0370167	0.856638	0.999927	282.565	274.755
Abcb9	66.3184	67.5282	41.9375	55.6975	38.5198	62.4453	-0.152753	0.663833	0.999927	58.5947	52.2209
Abcc1	734.296	672.913	573.881	953.93	833.525	787.837	0.384678	0.0131018	0.899413	660.364	858.431
Abcc10	116.656	110.178	102.636	110.511	88.8095	132.589	0.00358371	0.988964	0.999927	109.824	110.637
Abcc2	2.39705	1.18471	2.20724	0.884087	0	2.56625	-0.929304	0.59925	NA	1.92966	1.15011
Abcc3	89.4899	81.7447	90.4967	109.627	39.5898	70.1441	-0.245867	0.508039	0.999927	87.2437	73.1202
Abcc4	191.764	187.183	195.34	236.051	125.189	140.288	-0.197405	0.442504	0.999927	191.429	167.176
Abcc5	148.617	114.916	154.507	127.309	159.429	153.975	0.0785869	0.747238	0.999927	139.347	146.904
Abcc6	0.799017	2.36941	2.20724	0	2.13999	0	-1.77709	0.480219	NA	1.79189	0.713329
Abcc8	3.19607	1.18471	1.10362	4.42044	1.06999	0.855415	0.128736	0.950127	NA	1.82813	2.11528
Abcc9	209.342	156.381	156.714	112.279	173.339	124.891	-0.349864	0.155789	0.999927	174.146	136.836
Abcd1	206.146	210.878	171.061	167.977	199.019	193.324	-0.0669215	0.748283	0.999927	196.028	186.773
Abcd2	74.3085	163.489	66.2171	82.2201	246.099	59.0237	0.247111	0.735079	0.999927	101.338	129.114
Abcd3	2456.18	3126.44	3404.66	3585.86	3651.89	2849.39	0.170768	0.161851	0.999927	2995.76	3362.38
Abcd4	58.3282	49.7576	56.2845	56.5816	69.5496	52.1803	0.108972	0.754917	0.999927	54.7901	59.4372
Abce1	2197.3	2455.89	2388.23	3502.75	2648.23	2098.33	0.214454	0.15954	0.999927	2347.14	2749.77
Abcf1	1525.32	1427.57	1279.09	1582.52	1390.99	1657.79	0.134527	0.291762	0.999927	1410.66	1543.77
Abcf2	763.061	868.389	699.694	901.769	710.476	841.729	0.084287	0.571956	0.999927	777.048	817.991
Abcf3	849.355	875.497	860.822	968.959	893.445	927.27	0.114129	0.369569	0.999927	861.891	929.891
Abcg1	777.443	866.02	648.928	612.672	803.565	931.547	0.0329483	0.83237	0.999927	764.13	782.595
Abcg2	117.455	132.687	93.8075	83.1042	148.729	102.65	-0.0361263	0.903539	0.999927	114.65	111.494
Abcg3	79.9017	14.2165	20.9687	12.3772	14.9799	25.6625	-1.00135	0.0773094	0.999927	38.3623	17.6732
Abcg4	10.3872	10.6623	9.93256	13.2613	9.62994	6.84332	-0.0593472	0.941934	0.999927	10.3274	9.91152
Abcg8	1.59803	3.55412	1.10362	0.884087	1.06999	0.855415	-1.05564	0.637476	NA	2.08526	0.936499
Abhd1	2.39705	1.18471	2.20724	2.65226	1.06999	2.56625	0.104978	0.945767	NA	1.92966	2.09617
Abhd10	103.073	104.254	130.227	135.265	113.419	122.324	0.152869	0.560612	0.999927	112.518	123.67
Abhd11	290.043	347.119	305.702	279.371	262.148	367.829	-0.0574031	0.748938	0.999927	314.288	303.116
Abhd11os	83.8967	90.0376	56.2845	57.4657	41.7298	82.9753	-0.350198	0.285742	0.999927	76.7396	60.7236
Abhd12	1094.65	1248.68	1146.66	1114.83	1488.36	1480.72	0.226943	0.104151	0.999927	1163.33	1361.31
Abhd13	1425.45	1529.45	1671.98	1637.33	1705.57	1455.06	0.0531582	0.635606	0.999927	1542.29	1599.32
Abhd14a	127.843	131.502	88.2895	99.0177	53.4997	84.6861	-0.538792	0.0725616	0.999927	115.878	79.0678
Abhd14b	689.551	598.276	704.108	484.48	615.246	670.646	-0.172956	0.2822	0.999927	663.979	590.124
Abhd15	32.7597	77.0059	32.0049	20.334	72.7596	43.6262	-0.0146754	0.978053	0.999927	47.2568	45.5733
Abhd16a	652.797	694.237	471.245	515.423	467.587	722.826	-0.0951802	0.49198	0.999927	606.093	568.612
Abhd16b	3.19607	1.18471	2.20724	2.65226	0	1.71083	-0.607509	0.700741	NA	2.196	1.45436
Abhd17a	240.504	267.743	125.812	156.483	121.979	280.576	-0.191506	0.365811	0.999927	211.353	186.346
Abhd17b	1027.54	1172.86	1207.36	1224.46	1126.7	931.547	-0.0647839	0.622599	0.999927	1135.92	1094.24
Abhd17c	670.375	595.907	712.937	715.226	712.616	570.562	0.0115443	0.936892	0.999927	659.74	666.135
Abhd2	728.703	683.575	774.74	997.25	521.087	614.188	-0.0281386	0.893729	0.999927	729.006	710.842
Abhd3	75.1076	104.254	118.087	111.395	106.999	90.674	0.0724373	0.797668	0.999927	99.1496	103.023
Abhd4	492.194	503.5	507.664	388.998	477.217	435.406	-0.206786	0.18398	0.999927	501.119	433.874
Abhd5	463.43	674.097	504.354	521.611	682.656	509.827	0.0580485	0.757908	0.999927	547.294	571.365
Abhd6	235.71	293.807	203.066	273.183	277.128	273.733	0.177194	0.360436	0.999927	244.194	274.681
Abhd8	37.5538	43.8341	9.93256	27.4067	11.7699	23.9516	-0.35553	0.506836	0.999927	30.4402	21.0428
Abi1	1136.2	1091.11	1369.59	1107.76	1252.96	1070.12	-0.0627883	0.604357	0.999927	1198.97	1143.62
Abi2	735.894	813.893	944.697	982.221	892.375	740.79	0.0734104	0.596444	0.999927	831.495	871.795
Abi3	65.5194	46.2035	27.5905	57.4657	41.7298	47.0478	0.112746	0.76894	0.999927	46.4378	48.7477
Abi3bp	148.617	145.719	178.786	102.554	145.519	135.156	-0.297794	0.2197	0.999927	157.707	127.743
Abl1	966.81	971.459	772.533	732.908	876.325	1148.82	0.0151198	0.912703	0.999927	903.6	919.352
Abl2	906.085	952.503	955.733	932.712	950.154	920.427	-0.00178844	0.988458	0.999927	938.107	934.431
Ablim1	7048.92	7189.98	7912.94	4866.9	8531.06	7915.16	-0.0560701	0.729423	0.999927	7383.95	7104.37
Ablim2	25.5685	42.6494	26.4868	30.059	37.4498	36.7829	0.15612	0.738037	0.999927	31.5683	34.7639
Ablim3	27.9656	48.5729	20.9687	13.2613	51.3597	21.3854	-0.169124	0.763052	0.999927	32.5024	28.6688
Abo	246.896	290.253	281.423	201.572	215.069	260.046	-0.272446	0.15336	0.999927	272.857	225.562
Abr	387.523	343.565	356.469	421.71	315.648	342.166	-0.0111979	0.949466	0.999927	362.519	359.841
Abra	5.59312	4.73882	9.93256	6.18861	10.6999	6.84332	0.279432	0.75496	0.999927	6.75483	7.91062
Abracl	829.379	945.395	1010.91	1007.86	951.224	880.222	0.0241075	0.855485	0.999927	928.563	946.435
Abt1	175.784	171.782	147.885	170.629	138.029	165.951	-0.0597562	0.788845	0.999927	165.15	158.203
Abtb1	176.583	132.687	134.641	87.5246	89.8795	162.529	-0.429661	0.108627	0.999927	147.97	113.311
Abtb2	147.019	155.196	109.258	137.918	102.719	147.131	-0.0778609	0.766311	0.999927	137.158	129.256
Acaa1a	469.822	553.257	357.572	400.491	348.818	471.334	-0.167861	0.313194	0.999927	460.217	406.881
Acaa1b	11.1862	18.9553	17.6579	8.84087	24.6099	17.1083	0.0864786	0.897617	0.999927	15.9331	16.853
Acaa2	603.258	1711.9	571.674	498.625	1089.25	651.826	-0.28913	0.632209	0.999927	962.277	746.568
Acaca	421.082	927.624	519.804	648.036	1610.34	502.984	0.471268	0.465614	0.999927	622.837	920.453
Acacb	1500.55	2279.37	1674.19	1700.98	2003.03	2290.8	0.138715	0.356059	0.999927	1818.04	1998.27
Acad10	156.607	188.368	151.196	96.3655	160.499	153.975	-0.273125	0.267404	0.999927	165.39	136.946
Acad11	1015.55	1363.6	1020.85	1086.54	1359.96	1086.38	0.0620942	0.699663	0.999927	1133.33	1177.63
Acad12	75.1076	74.6364	67.3207	38.0157	54.5697	78.6982	-0.369126	0.289733	0.999927	72.3549	57.0945
Acad8	413.891	417.016	490.006	305.894	422.648	398.624	-0.223826	0.195011	0.999927	440.304	375.722
Acad9	462.631	504.685	474.556	543.714	500.757	471.334	0.0728494	0.638993	0.999927	480.624	505.268
Acadl	1397.48	2113.51	1510.85	1213.85	1830.76	1147.11	-0.271847	0.156786	0.999927	1673.95	1397.24
Acadm	1228.09	2612.28	1481.06	1182.91	2204.19	1255.75	-0.203594	0.65865	0.999927	1773.81	1547.62
Acads	445.052	630.263	295.77	290.865	306.018	538.912	-0.273991	0.158497	0.999927	457.028	378.598
Acadsb	2824.52	3143.02	3562.48	2318.96	3085.86	2861.36	-0.198604	0.13475	0.999927	3176.68	2755.4
Acadvl	1410.26	2932.15	1552.79	1537.43	2161.39	1532.9	-0.153927	0.694696	0.999927	1965.07	1743.91
Acap1	127.843	17.7706	18.7615	23.8703	20.3299	36.7829	-0.773425	0.137607	0.999927	54.7916	26.9944
Acap2	1048.31	883.79	1129	1001.67	1072.13	988.005	0.00424677	0.973984	0.999927	1020.37	1020.6
Acap3	170.99	194.292	174.372	193.615	197.949	226.685	0.198821	0.348324	0.999927	179.884	206.083
Acat1	1710.69	2194.07	1731.58	1582.52	2012.66	1564.55	-0.130161	0.387596	0.999927	1878.78	1719.91
Acat2	168.593	248.788	143.47	178.586	258.938	181.348	0.156861	0.547191	0.999927	186.95	206.291
Acat3	2.39705	5.92353	4.41447	12.3772	8.55995	1.71083	0.666394	0.511711	0.999927	4.24502	7.54933
Acbd3	1063.49	1178.78	1136.73	1227.11	1119.21	952.077	-0.0343059	0.803206	0.999927	1126.33	1099.47
Acbd4	170.99	206.139	139.056	135.265	165.849	172.794	-0.11251	0.622726	0.999927	172.061	157.969
Acbd5	1517.33	1711.9	1815.45	1777.9	1855.37	1567.98	0.0452206	0.694386	0.999927	1681.56	1733.75
Acbd6	172.588	178.891	192.03	164.44	177.619	167.661	-0.0896783	0.673038	0.999927	181.169	169.907
Accs	57.5292	47.3882	62.9062	49.5089	75.9696	65.867	0.191166	0.57633	0.999927	55.9412	63.7818
Acd	106.269	90.0376	72.8388	80.4519	70.6196	100.084	-0.103389	0.720896	0.999927	89.7152	83.7184
Ace	528.15	597.092	471.245	409.332	495.407	608.2	-0.0814792	0.606594	0.999927	532.162	504.313
Ace2	6.39213	8.29294	8.82895	10.609	6.41996	8.55415	0.1596	0.859558	0.999927	7.83801	8.52772
Acer2	42.3479	68.7129	36.4194	21.2181	54.5697	36.7829	-0.369768	0.432669	0.999927	49.1601	37.5235
Acer3	371.543	497.576	537.462	552.554	479.357	390.069	0.00739822	0.96675	0.999927	468.86	473.994
Ache	15.9803	18.9553	3.31085	9.72496	6.41996	9.40957	-0.318323	0.687234	0.999927	12.7488	8.51816
Acin1	1335.96	1261.71	1255.92	1331.44	1407.04	1411.44	0.109555	0.361733	0.999927	1284.53	1383.3
Ackr1	11.1862	3.55412	5.51809	5.30452	2.13999	7.69874	-0.472546	0.654704	0.999927	6.75281	5.04775
Ackr2	13.5833	8.29294	15.4507	10.609	5.34997	7.69874	-0.646044	0.38215	0.999927	12.4423	7.88592
Ackr3	93.4849	161.12	112.569	94.5973	111.279	102.65	-0.243316	0.403523	0.999927	122.391	102.842
Ackr4	49.539	31.987	35.3158	25.6385	63.1296	65.0116	0.381283	0.410075	0.999927	38.9473	51.2599
Acly	3979.9	4912.97	3648.56	5023.38	3594.11	4291.62	0.0494573	0.736434	0.999927	4180.48	4303.04
Acmsd	1.59803	1.18471	3.31085	1.76817	1.06999	2.56625	-0.0628673	0.968436	NA	2.0312	1.80147
Acnat1	40.7498	26.0635	43.0411	58.3497	1.06999	5.13249	-0.909882	0.244097	0.999927	36.6182	21.5174
Aco1	1003.56	1113.62	954.63	1127.21	1191.97	1027.35	0.126781	0.344368	0.999927	1023.94	1115.51
Aco2	5973.45	9788.04	5372.41	6086.94	7795.97	7266.75	0.0303728	0.857084	0.999927	7044.63	7049.89
Acot1	127.044	82.9294	122.502	160.904	67.4096	56.4574	-0.239974	0.526768	0.999927	110.825	94.9236
Acot11	329.994	433.602	377.437	450.884	449.397	422.575	0.218668	0.191764	0.999927	380.345	440.952
Acot13	541.733	578.136	589.332	438.507	637.716	565.429	-0.0585751	0.741064	0.999927	569.734	547.218
Acot2	50.338	75.8212	48.5592	58.3497	57.7797	53.0357	-0.0451223	0.89948	0.999927	58.2395	56.3884
Acot4	3.19607	1.18471	1.10362	7.95678	8.55995	0.855415	1.36136	0.321701	NA	1.82813	5.79072
Acot6	30.3626	31.987	39.7303	25.6385	27.8198	23.9516	-0.384832	0.427438	0.999927	34.0266	25.8033
Acot7	121.451	118.471	83.875	141.454	75.9696	102.65	-0.00397666	0.989312	0.999927	107.932	106.691
Acot8	135.034	142.165	86.0822	121.12	94.1594	142.854	-0.00508806	0.983735	0.999927	121.094	119.378
Acot9	217.333	259.451	231.76	381.926	266.428	236.095	0.296021	0.156986	0.999927	236.181	294.816
Acox1	2213.28	2511.58	2292.22	2416.21	3017.38	2400.3	0.159215	0.208253	0.999927	2339.02	2611.3
Acox2	13.5833	14.2165	9.93256	30.059	16.0499	11.9758	0.643593	0.343687	0.999927	12.5774	19.3616
Acox3	608.851	562.735	643.409	563.163	671.956	709.139	0.0996118	0.493637	0.999927	604.998	648.086
Acoxl	1.59803	1.18471	3.31085	0.884087	0	0	-2.4713	0.308789	NA	2.0312	0.294696
Acp1	449.047	439.526	425.997	506.582	385.198	411.455	-0.019305	0.904917	0.999927	438.19	434.411
Acp2	356.361	368.443	354.261	429.666	429.067	404.611	0.226431	0.147088	0.999927	359.689	421.115
Acp5	314.014	329.348	192.03	213.949	216.139	222.408	-0.328514	0.089232	0.999927	278.464	217.499
Acp6	159.004	137.426	175.475	164.44	189.389	150.553	0.0938588	0.668958	0.999927	157.302	168.127
Acpp	6172.4	5466.23	8969.11	4188.8	7326.25	6558.47	-0.154709	0.383455	0.999927	6869.25	6024.51
Acpt	64.7203	23.6941	76.1497	80.4519	41.7298	70.9995	0.279259	0.529869	0.999927	54.8547	64.3937
Acrbp	44.7449	17.7706	48.5592	33.5953	44.9397	42.7708	0.145439	0.746048	0.999927	37.0249	40.4353
Acrv1	0.799017	0	3.31085	0	2.13999	0	-0.863601	0.760003	NA	1.36996	0.713329
Acsbg1	12.7843	16.5859	4.41447	8.84087	11.7699	13.6866	0.158802	0.834429	0.999927	11.2615	11.4325
Acsf2	620.037	580.506	612.508	407.564	603.476	719.404	-0.0816054	0.654307	0.999927	604.35	576.815
Acsf3	170.99	217.986	112.569	181.238	143.379	168.517	0.0239652	0.920786	0.999927	167.181	164.378
Acsl1	2086.23	3849.11	1898.22	2269.45	4436.19	2289.95	0.214402	0.644833	0.999927	2611.19	2998.53
Acsl3	1116.23	1242.76	1509.75	1575.44	1179.13	1013.67	-0.0351537	0.822273	0.999927	1289.58	1256.08
Acsl4	956.423	847.064	1318.82	1578.98	914.845	851.138	0.107517	0.556949	0.999927	1040.77	1114.99
Acsl5	2001.54	2288.85	3372.66	2445.38	2153.9	2109.45	-0.158777	0.265189	0.999927	2554.35	2236.25
Acsl6	43.1469	58.0506	41.9375	74.2633	58.8497	65.867	0.488206	0.189808	0.999927	47.7117	66.3266
Acsm1	615.243	576.952	586.021	343.91	684.796	731.38	-0.0262481	0.907366	0.999927	592.739	586.695
Acsm2	0	0	2.20724	1.76817	2.13999	1.71083	2.21478	0.402518	NA	0.735745	1.873
Acsm3	335.587	388.583	321.153	234.283	453.677	401.19	0.0593108	0.793671	0.999927	348.441	363.05
Acsm4	0	1.18471	3.31085	0.884087	4.27997	0.855415	0.831593	0.721629	NA	1.49852	2.00649
Acsm5	7.19115	4.73882	6.62171	7.0727	11.7699	8.55415	0.544659	0.549701	0.999927	6.18389	9.13226
Acss1	5713.77	5596.55	6460.58	4155.21	6239.13	5555.92	-0.152768	0.266142	0.999927	5923.63	5316.75
Acss2	968.408	979.751	1020.85	934.48	1320.37	1246.34	0.237682	0.106866	0.999927	989.669	1167.06
Acss2os	0.799017	0	6.62171	11.4931	11.7699	7.69874	2.80271	0.015391	0.970427	2.47358	10.3206
Acss3	35.9557	61.6047	41.9375	19.4499	117.699	41.0599	0.299256	0.57822	0.999927	46.4993	59.4031
Acta1	29.5636	215.616	22.0724	17.6817	40.6598	60.7345	-0.873106	0.369829	0.999927	89.0841	39.692
Acta2	5984.63	7893.69	5458.5	4916.41	6636.1	8488.29	0.0472603	0.712258	0.999927	6445.61	6680.26
Actb	18907.9	18843.9	12985.2	21491.3	14016.9	16740.5	0.0598582	0.684836	0.999927	16912.3	17416.2
Actbl2	1.59803	3.55412	3.31085	6.18861	6.41996	6.84332	1.23511	0.302907	NA	2.821	6.48396
Actc1	0.799017	5.92353	2.20724	0	0	1.71083	-2.6747	0.215079	NA	2.97659	0.570277
Actg1	2177.32	2215.4	1812.14	2933.4	2272.67	2291.66	0.282637	0.0503706	0.999927	2068.29	2499.24
Actg2	220.529	263.005	206.377	207.76	277.128	357.564	0.277383	0.19094	0.999927	229.97	280.817
Actl6a	406.699	427.679	361.987	556.091	410.878	398.624	0.191501	0.293538	0.999927	398.788	455.197
Actl6b	6.39213	3.55412	6.62171	3.53635	3.20998	9.40957	-0.163847	0.885799	NA	5.52265	5.3853
Actl7a	0.799017	1.18471	1.10362	2.65226	1.06999	7.69874	1.68259	0.297926	NA	1.02911	3.807
Actn1	830.178	864.835	682.036	845.187	787.515	921.282	0.110368	0.399338	0.999927	792.35	851.328
Actn2	2.39705	7.10823	3.31085	7.95678	6.41996	3.42166	0.424665	0.676592	0.999927	4.27205	5.9328
Actn3	1.59803	52.127	2.20724	4.42044	0	2.56625	-2.75205	0.0243583	0.999927	18.6441	2.32889
Actn4	2100.61	2278.19	1739.3	2201.38	1594.29	2482.42	0.0355978	0.791774	0.999927	2039.37	2092.69
Actr10	905.286	1011.74	1000.98	1073.28	1009	888.776	0.0206759	0.872675	0.999927	972.669	990.354
Actr1a	1170.56	1284.22	999.878	1296.96	1219.79	1351.56	0.170209	0.178095	0.999927	1151.55	1289.43
Actr1b	994.776	1036.62	802.33	951.278	771.465	1027.35	-0.0386026	0.772278	0.999927	944.575	916.699
Actr2	3540.44	3821.86	4086.7	4619.35	3957.91	3467	0.0701317	0.547134	0.999927	3816.33	4014.75
Actr3	1721.88	1741.52	1688.54	1815.03	1716.27	1510.66	-0.0390658	0.727637	0.999927	1717.31	1680.65
Actr3b	23.9705	23.6941	18.7615	37.1317	28.8898	18.8191	0.335917	0.548441	0.999927	22.142	28.2802
Actr5	90.2889	78.1906	91.6003	100.786	75.9696	103.505	0.105838	0.712565	0.999927	86.6933	93.4202
Actr6	139.828	144.534	153.403	139.686	164.779	123.18	-0.0454318	0.845371	0.999927	145.922	142.548
Actr8	489.797	542.595	560.638	495.973	567.097	521.803	-0.00288802	0.984379	0.999927	531.01	528.291
Acvr1	189.367	183.629	199.755	207.76	163.709	189.902	-0.0289611	0.890951	0.999927	190.917	187.124
Acvr1b	371.543	375.552	382.956	373.969	355.238	404.611	0.00818405	0.959263	0.999927	376.683	377.939
Acvr1c	19.1764	139.795	12.1398	15.0295	174.409	7.69874	0.160418	0.913393	0.999927	57.0372	65.7124
Acvr2a	512.969	605.385	699.694	610.904	622.736	564.574	-0.00412591	0.977193	0.999927	606.016	599.405
Acvr2b	20.7744	11.8471	6.62171	12.3772	9.62994	10.265	-0.205925	0.78812	0.999927	13.0811	10.7574
Acvrl1	177.382	169.413	114.776	122.888	108.069	182.203	-0.169575	0.467919	0.999927	153.857	137.72
Acy1	204.548	150.458	108.155	227.21	85.5995	118.903	-0.0646199	0.848687	0.999927	154.387	143.904
Acy3	105.47	93.5917	119.191	70.727	145.519	124.035	0.0939089	0.757775	0.999927	106.084	113.427
Acyp1	102.274	104.254	82.7714	61.8861	78.1095	90.674	-0.329085	0.250509	0.999927	96.4332	76.8899
Acyp2	26.3675	75.8212	44.1447	59.2338	60.9896	35.072	0.0321211	0.944382	0.999927	48.7778	51.7652
Ada	93.4849	87.6682	78.3569	111.395	59.9196	65.0116	-0.143688	0.661794	0.999927	86.5034	78.7754
Adal	170.99	161.12	182.097	203.34	163.709	173.649	0.0746199	0.728819	0.999927	171.402	180.233
Adam10	1384.7	1267.63	1681.91	1551.57	1491.57	1326.75	0.0163229	0.887985	0.999927	1444.75	1456.63
Adam11	15.1813	9.47764	7.72533	5.30452	4.27997	13.6866	-0.56143	0.473477	0.999927	10.7948	7.75705
Adam12	8.78918	58.0506	18.7615	12.3772	71.6896	9.40957	-0.103476	0.892348	0.999927	28.5338	31.1588
Adam15	901.291	1131.39	634.58	703.733	692.286	1142.83	-0.0731174	0.601188	0.999927	889.088	846.285
Adam17	581.684	542.595	568.363	621.513	614.176	487.587	0.0167094	0.908583	0.999927	564.214	574.425
Adam19	131.838	77.0059	96.0148	87.5246	84.5295	125.746	-0.0461724	0.881792	0.999927	101.619	99.2667
Adam1a	35.9557	42.6494	43.0411	41.5521	52.4297	48.7587	0.236566	0.540819	0.999927	40.5488	47.5802
Adam1b	3.99508	1.18471	5.51809	12.3772	7.48996	9.40957	1.51472	0.126576	0.999927	3.56596	9.75891
Adam21	2.39705	1.18471	4.41447	2.65226	5.34997	1.71083	0.297847	0.828283	NA	2.66541	3.23769
Adam22	39.1518	49.7576	50.7664	40.668	51.3597	52.1803	0.0519895	0.889915	0.999927	46.5586	48.0693
Adam23	120.652	85.2988	109.258	73.3792	103.789	79.5536	-0.303081	0.284838	0.999927	105.07	85.5741
Adam28	125.446	81.7447	160.025	135.265	58.8497	54.7466	-0.546967	0.121899	0.999927	122.405	82.9538
Adam32	3.99508	1.18471	6.62171	2.65226	4.27997	1.71083	-0.398601	0.777492	NA	3.93383	2.88102
Adam33	12.7843	4.73882	8.82895	7.95678	10.6999	18.8191	0.468519	0.522287	0.999927	8.78401	12.492
Adam4	19.9754	20.14	35.3158	26.5226	34.2398	17.9637	0.0834552	0.870077	0.999927	25.1437	26.242
Adam5	1.59803	0	3.31085	2.65226	0	0.855415	-0.162965	0.942067	NA	1.6363	1.16923
Adam8	36.7548	30.8023	24.2796	45.0884	17.1199	42.7708	0.172506	0.71661	0.999927	30.6122	34.993
Adam9	2397.05	2210.66	2555.98	2885.66	1825.41	1811.77	-0.131396	0.452145	0.999927	2387.9	2174.28
Adamdec1	41.5489	17.7706	29.7977	20.334	17.1199	17.1083	-0.71928	0.178305	0.999927	29.7057	18.1874
Adamts1	63.1223	119.655	100.429	130.845	72.7596	53.8912	-0.138664	0.707265	0.999927	94.4023	85.8319
Adamts10	246.097	189.553	205.273	160.02	239.679	284.853	0.0774902	0.742662	0.999927	213.641	228.184
Adamts12	111.063	119.655	207.48	103.438	135.889	113.77	-0.24967	0.312695	0.999927	146.066	117.699
Adamts13	4.7941	1.18471	2.20724	1.76817	3.20998	0.855415	-0.52342	0.764982	NA	2.72868	1.94452
Adamts14	11.1862	13.0318	13.2434	13.2613	14.9799	17.1083	0.282586	0.658195	0.999927	12.4871	15.1165
Adamts15	114.259	107.808	214.102	155.599	100.579	118.047	-0.13067	0.644944	0.999927	145.39	124.742
Adamts16	0.799017	0	4.41447	1.76817	0	0	-0.805577	0.725907	NA	1.73783	0.589391
Adamts17	60.7253	67.5282	73.9424	70.727	56.7097	57.3128	-0.116356	0.723346	0.999927	67.3986	61.5831
Adamts18	11.9852	21.3247	33.1085	19.4499	16.0499	16.2529	-0.239608	0.686303	0.999927	22.1395	17.2509
Adamts2	924.462	928.809	889.516	663.949	859.205	1199.29	-0.0358367	0.821194	0.999927	914.263	907.482
Adamts20	12.7843	16.5859	15.4507	13.2613	5.34997	18.8191	-0.32239	0.638131	0.999927	14.9403	12.4768
Adamts3	10.3872	14.2165	5.51809	6.18861	12.8399	9.40957	-0.0143225	0.985477	0.999927	10.0406	9.47937
Adamts4	4.7941	1.18471	4.41447	3.53635	2.13999	0	-1.20497	0.514538	NA	3.46443	1.89211
Adamts5	119.852	164.674	217.413	234.283	105.929	118.047	-0.129961	0.660243	0.999927	167.313	152.753
Adamts6	35.1567	8.29294	19.8651	12.3772	12.8399	17.1083	-0.547996	0.35611	0.999927	21.1049	14.1085
Adamts7	20.7744	10.6623	15.4507	16.7977	13.9099	17.9637	0.0347679	0.957256	0.999927	15.6291	16.2238
Adamts8	11.1862	15.4012	7.72533	7.0727	4.27997	10.265	-0.672284	0.417772	0.999927	11.4376	7.20588
Adamts9	103.872	107.808	156.714	143.222	113.419	108.638	0.0247591	0.924576	0.999927	122.798	121.76
Adamtsl1	50.338	48.5729	75.046	74.2633	31.0298	41.0599	-0.214731	0.611817	0.999927	57.9857	48.7844
Adamtsl2	66.3184	78.1906	75.046	38.0157	39.5898	55.602	-0.721466	0.0443	0.999927	73.185	44.4025
Adamtsl3	149.416	157.566	153.403	83.1042	226.839	224.974	0.201968	0.523056	0.999927	153.462	178.306
Adamtsl4	50.338	43.8341	27.5905	91.945	31.0298	49.6141	0.534529	0.243841	0.999927	40.5875	57.5297
Adamtsl5	43.9459	40.28	18.7615	29.1749	33.1698	32.5058	-0.0499925	0.912647	0.999927	34.3291	31.6168
Adap1	40.7498	21.3247	13.2434	19.4499	11.7699	29.0841	-0.287526	0.596692	0.999927	25.106	20.1013
Adap2	99.8771	79.3753	101.533	63.6543	97.3694	103.505	-0.0932095	0.762562	0.999927	93.5951	88.1763
Adar	707.929	663.435	609.197	580.845	600.266	739.079	-0.0497222	0.719354	0.999927	660.187	640.063
Adarb1	131.838	149.273	68.4243	83.1042	114.489	129.168	-0.0438044	0.880922	0.999927	116.512	108.92
Adat1	64.7203	61.6047	66.2171	57.4657	56.7097	74.4211	-0.0345907	0.918132	0.999927	64.1807	62.8655
Adat2	29.5636	30.8023	20.9687	45.0884	24.6099	32.5058	0.338221	0.483112	0.999927	27.1116	34.068
Adat3	11.9852	4.73882	8.82895	15.0295	8.55995	19.6746	0.704416	0.354496	0.999927	8.51767	14.4213
Adck1	202.151	236.941	172.164	183.006	185.109	204.444	-0.0832534	0.685763	0.999927	203.752	190.853
Adck2	209.342	202.585	232.863	219.254	204.369	205.3	-0.0307765	0.878549	0.999927	214.93	209.641
Adck3	321.205	707.269	344.329	206.876	528.577	354.997	-0.307683	0.564862	0.999927	457.601	363.484
Adck4	123.049	119.655	78.3569	94.5973	103.789	125.746	0.026398	0.918918	0.999927	107.02	108.044
Adck5	130.24	143.349	134.641	120.236	105.929	119.758	-0.236144	0.322332	0.999927	136.077	115.308
Adcy1	7.19115	2.36941	7.72533	2.65226	3.20998	6.84332	-0.488616	0.655753	0.999927	5.76196	4.23519
Adcy10	3.19607	3.55412	3.31085	1.76817	6.41996	0.855415	-0.385117	0.756743	NA	3.35368	3.01452
Adcy2	131.838	111.362	155.61	130.845	92.0195	76.132	-0.411965	0.135602	0.999927	132.937	99.6654
Adcy3	81.4997	144.534	87.1858	89.2928	125.189	80.409	-0.0880014	0.787211	0.999927	104.407	98.297
Adcy4	44.7449	27.2482	18.7615	44.2044	28.8898	40.2045	0.351083	0.426725	0.999927	30.2516	37.7662
Adcy5	135.833	158.751	115.88	106.09	135.889	161.673	-0.02439	0.921204	0.999927	136.821	134.551
Adcy6	2188.51	2303.07	2302.15	2630.16	2162.46	2597.9	0.128801	0.291912	0.999927	2264.57	2463.5
Adcy7	455.439	265.374	316.738	234.283	282.478	412.31	-0.175826	0.468355	0.999927	345.851	309.691
Adcy8	1339.15	1331.61	891.724	1879.57	1169.5	1381.5	0.343726	0.0607284	0.999927	1187.49	1476.86
Adcy9	1178.55	1402.69	1161.01	1323.48	1532.23	1522.64	0.235939	0.0620951	0.999927	1247.42	1459.45
Adcyap1	1.59803	2.36941	3.31085	5.30452	2.13999	1.71083	0.305895	0.849245	NA	2.4261	3.05178
Adcyap1r1	91.8869	60.42	82.7714	74.2633	71.6896	67.5778	-0.144063	0.645109	0.999927	78.3594	71.1769
Add1	1951.2	1807.86	1804.42	1706.29	2080.07	2032.47	0.0639746	0.597743	0.999927	1854.49	1939.61
Add2	18.3774	22.5094	22.0724	12.3772	21.3999	23.9516	-0.134317	0.807755	0.999927	20.9864	19.2429
Add3	1500.55	1399.14	1588.11	1145.78	1412.39	1337.87	-0.202569	0.115766	0.999927	1495.93	1298.68
Adgb	7.19115	8.29294	5.51809	5.30452	6.41996	3.42166	-0.529968	0.605675	0.999927	7.00073	5.04872
Adgra1	0	0	2.20724	0	5.34997	2.56625	2.48955	0.350749	NA	0.735745	2.63874
Adgra2	799.017	799.676	857.511	862.869	802.495	819.488	0.0222863	0.865192	0.999927	818.735	828.284
Adgra3	81.4997	84.1141	79.4605	67.1906	58.8497	68.4332	-0.332788	0.284773	0.999927	81.6914	64.8245
Adgrb1	3.19607	2.36941	0	0.884087	0	0	-1.67122	0.546982	NA	1.85516	0.294696
Adgrb2	11.1862	11.8471	12.1398	18.5658	12.8399	14.5421	0.389119	0.569241	0.999927	11.7244	15.3159
Adgrb3	3.99508	2.36941	3.31085	1.76817	0	1.71083	-1.49666	0.365968	NA	3.22512	1.15967
Adgrd1	36.7548	40.28	46.352	48.6248	27.8198	38.4937	-0.0889105	0.836618	0.999927	41.1289	38.3128
Adgre1	322.004	361.335	360.883	305.01	374.498	450.804	0.109458	0.559964	0.999927	348.074	376.771
Adgre4	23.9705	17.7706	9.93256	5.30452	14.9799	16.2529	-0.390405	0.593235	0.999927	17.2245	12.1791
Adgre5	447.449	406.354	354.261	371.317	400.178	492.719	0.0600005	0.721199	0.999927	402.688	421.404
Adgrf1	9.5882	5.92353	22.0724	7.0727	4.27997	10.265	-0.624434	0.475344	0.999927	12.528	7.20588
Adgrf2	3.99508	1.18471	3.31085	6.18861	4.27997	4.27708	0.779601	0.529666	NA	2.83021	4.91522
Adgrf3	0.799017	1.18471	3.31085	2.65226	5.34997	2.56625	1.19398	0.476536	NA	1.76486	3.52283
Adgrf4	6.39213	9.47764	9.93256	9.72496	11.7699	13.6866	0.477064	0.541277	0.999927	8.60078	11.7272
Adgrf5	463.43	646.849	624.648	496.857	679.446	541.478	-0.0119301	0.945921	0.999927	578.309	572.594
Adgrg1	1625.2	1499.84	1553.89	1234.19	1710.92	2011.94	0.0709688	0.633174	0.999927	1559.64	1652.35
Adgrg2	86.2938	66.3435	104.844	77.7997	43.8697	43.6262	-0.630011	0.061619	0.999927	85.827	55.0985
Adgrg3	11.1862	5.92353	22.0724	7.95678	9.62994	8.55415	-0.439041	0.549946	0.999927	13.0607	8.71363
Adgrg5	15.9803	2.36941	6.62171	5.30452	5.34997	11.1204	-0.158424	0.848697	0.999927	8.32382	7.2583
Adgrg6	524.954	534.302	721.766	734.676	571.377	555.165	0.0868487	0.610996	0.999927	593.674	620.406
Adgrl1	381.131	392.138	292.459	358.939	380.918	473.045	0.190648	0.243166	0.999927	355.242	404.301
Adgrl2	395.513	395.692	478.97	486.248	359.518	339.6	-0.0898647	0.623931	0.999927	423.392	395.122
Adgrl3	83.0977	73.4517	84.9786	66.3065	31.0298	46.1924	-0.744183	0.0363408	0.999927	80.5094	47.8429
Adgrl4	141.426	167.043	171.061	203.34	191.529	141.999	0.149162	0.500103	0.999927	159.843	178.956
Adgrv1	17.5784	5.92353	22.0724	8.84087	13.9099	7.69874	-0.561769	0.422533	0.999927	15.1914	10.1498
Adh1	1216.1	1030.69	618.026	788.606	931.965	858.837	-0.100217	0.574028	0.999927	954.941	859.802
Adh5	881.315	1025.96	839.853	812.476	975.834	945.234	-0.00487176	0.972134	0.999927	915.708	911.181
Adh6a	36.7548	20.14	47.4556	47.7407	65.2696	60.7345	0.767851	0.0832991	0.999927	34.7834	57.9149
Adh7	11.1862	13.0318	4.41447	17.6817	2.13999	5.98791	-0.0595416	0.947229	0.999927	9.54416	8.60321
Adhfe1	197.357	306.839	273.697	95.4814	343.468	218.986	-0.246505	0.454533	0.999927	259.298	219.312
Adi1	766.257	661.066	752.668	635.659	916.985	680.055	0.0292551	0.855377	0.999927	726.663	744.233
Adig	3.99508	98.3306	9.93256	8.84087	65.2696	11.9758	-0.1776	0.904668	0.999927	37.4194	28.6954
Adipoq	92.6859	661.066	102.636	91.945	700.846	35.9274	-0.344073	0.797893	0.999927	285.463	276.239
Adipor1	2206.88	2384.81	2060.46	1957.37	2071.51	2286.53	-0.0760844	0.492006	0.999927	2217.38	2105.13
Adipor2	1880.89	2391.92	1825.38	1969.75	2478.11	2027.33	0.0891706	0.541334	0.999927	2032.73	2158.4
Adk	766.257	957.242	831.025	861.101	861.345	813.5	-0.0092088	0.94749	0.999927	851.508	845.315
Adm	153.411	159.935	147.885	148.527	188.319	191.613	0.194639	0.411812	0.999927	153.744	176.153
Adm2	19.9754	4.73882	5.51809	44.2044	8.55995	8.55415	1.03186	0.212441	0.999927	10.0774	20.4395
Adnp	7.99017	3.55412	14.347	4.42044	11.7699	6.84332	-0.0569873	0.952511	0.999927	8.63044	7.6779
Adnp2	304.425	331.718	307.909	289.096	287.828	257.48	-0.179205	0.309433	0.999927	314.684	278.135
Ado	584.081	650.403	609.197	640.079	667.676	550.032	0.0106576	0.942337	0.999927	614.561	619.262
Adora1	321.205	403.985	305.702	242.24	371.288	425.141	0.00558015	0.97826	0.999927	343.631	346.223
Adora2a	11.9852	5.92353	4.41447	7.0727	6.41996	10.265	0.12695	0.875569	0.999927	7.44108	7.91921
Adora2b	7.19115	3.55412	5.51809	5.30452	4.27997	4.27708	-0.239744	0.831347	NA	5.42112	4.62052
Adora3	0.799017	2.36941	2.20724	1.76817	2.13999	4.27708	0.626883	0.727097	NA	1.79189	2.72841
Adpgk	314.813	294.992	269.283	396.955	289.968	302.817	0.169472	0.381267	0.999927	293.029	329.913
Adprh	230.916	235.756	194.237	209.529	163.709	218.131	-0.160295	0.4326	0.999927	220.303	197.123
Adprhl1	0.799017	0	0	0	1.06999	2.56625	1.78893	0.4851	NA	0.266339	1.21208
Adprhl2	213.337	209.693	126.916	161.788	157.289	232.673	0.0151248	0.942094	0.999927	183.315	183.917
Adprm	147.818	152.827	146.781	131.729	166.919	134.3	-0.0515466	0.82548	0.999927	149.142	144.316
Adra1a	2199.69	2186.97	2458.86	1945.88	2550.86	2779.24	0.0870472	0.528437	0.999927	2281.84	2425.33
Adra1b	3.19607	4.73882	0	3.53635	1.06999	1.71083	0.291277	0.873387	NA	2.64496	2.10572
Adra1d	3.99508	4.73882	3.31085	1.76817	5.34997	5.13249	0.00714505	0.995196	NA	4.01492	4.08354
Adra2a	0.799017	1.18471	3.31085	0.884087	5.34997	5.98791	1.40979	0.36555	NA	1.76486	4.07399
Adra2b	0.799017	2.36941	0	0.884087	3.20998	0.855415	1.00818	0.667041	NA	1.05614	1.64983
Adra2c	3.19607	5.92353	3.31085	1.76817	2.13999	4.27708	-0.641281	0.625749	NA	4.14348	2.72841
Adrb1	355.562	349.488	334.396	437.623	597.056	582.538	0.635812	0.000688853	0.234242	346.482	539.072
Adrb2	250.891	251.158	221.827	311.199	361.658	289.13	0.405081	0.0340364	0.999927	241.292	320.662
Adrb3	4.7941	59.2353	4.41447	7.95678	37.4498	0	-0.706882	0.694721	0.999927	22.8146	15.1355
Adrbk1	876.521	714.377	562.845	667.486	583.147	740.79	-0.107101	0.463347	0.999927	717.915	663.807
Adrbk2	1127.41	1043.73	1366.28	1146.66	1230.49	1185.61	0.0238208	0.851513	0.999927	1179.14	1187.59
Adrm1	216.534	235.756	157.817	256.385	127.329	238.661	0.034307	0.890281	0.999927	203.369	207.458
Adsl	493.792	496.392	449.173	557.859	418.368	503.84	0.0406739	0.799045	0.999927	479.786	493.355
Adss	970.805	767.689	1239.36	1353.54	1301.11	1058.15	0.333209	0.01794	0.999927	992.619	1237.6
Adssl1	67.9164	66.3435	36.4194	42.4362	74.8996	77.8428	0.228288	0.533432	0.999927	56.8931	65.0595
Adtrp	286.847	371.998	300.184	234.283	328.488	218.986	-0.30131	0.162801	0.999927	319.676	260.586
Aebp1	285.249	316.316	222.931	270.531	224.699	351.576	0.0372999	0.839361	0.999927	274.832	282.268
Aebp2	618.439	608.939	669.896	594.106	719.036	634.718	0.0381202	0.789145	0.999927	632.425	649.287
Aen	135.833	168.228	77.2533	170.629	127.329	130.023	0.241397	0.403373	0.999927	127.105	142.66
Aes	2869.27	3024.55	1956.72	2384.38	2208.47	3318.16	0.0133709	0.896701	0.999927	2616.85	2637
AF251705	39.9508	54.4965	32.0049	42.4362	47.0797	67.5778	0.312609	0.420696	0.999927	42.1507	52.3646
AF357359	3.99508	2.36941	12.1398	7.95678	1.06999	2.56625	-0.361125	0.75791	NA	6.1681	3.86434
AF357399	8.78918	5.92353	3.31085	7.95678	6.41996	8.55415	0.392817	0.667978	0.999927	6.00786	7.64363
AF529169	3.19607	2.36941	4.41447	0.884087	1.06999	1.71083	-1.42439	0.361519	NA	3.32665	1.22164
Afap1	356.361	335.272	347.64	346.562	342.398	427.708	0.0994807	0.554764	0.999927	346.424	372.223
Afap1l1	29.5636	54.4965	25.3832	26.5226	39.5898	28.2287	-0.180227	0.702989	0.999927	36.4811	31.447
Afap1l2	75.1076	73.4517	108.155	81.336	63.1296	70.1441	-0.225444	0.493299	0.999927	85.5713	71.5366
Aff1	1752.24	1708.35	1856.29	1645.29	1937.76	1955.48	0.0604843	0.613413	0.999927	1772.29	1846.17
Aff2	7.19115	14.2165	11.0362	9.72496	8.55995	7.69874	-0.282279	0.741232	0.999927	10.8146	8.66121
Aff3	121.451	40.28	36.4194	25.6385	53.4997	53.8912	-0.468703	0.320497	0.999927	66.05	44.3431
Aff4	4545.61	4593.1	5919.81	5156.88	5758.71	4946.87	0.0866482	0.388302	0.999927	5019.51	5287.48
Afg3l1	570.498	600.646	490.006	594.991	547.837	577.405	0.0586641	0.69333	0.999927	553.717	573.411
Afg3l2	1023.54	1086.37	973.391	1182.02	1143.82	1032.49	0.127675	0.339296	0.999927	1027.77	1119.44
Afmid	21.5734	14.2165	19.8651	29.1749	22.4699	28.2287	0.514305	0.334531	0.999927	18.5517	26.6245
Afp	3.99508	1.18471	0	0	0	0	-2.77309	0.26679	NA	1.7266	0
Aftph	3132.15	3173.83	3547.03	3222.5	3781.36	3247.16	0.0593308	0.576029	0.999927	3284.33	3417
Aga	445.851	523.64	488.903	415.521	423.718	420.009	-0.210413	0.17402	0.999927	486.131	419.749
Agap1	1431.84	1358.86	1250.4	1212.08	1228.35	1515.8	-0.0325403	0.796869	0.999927	1347.03	1318.74
Agap2	67.1174	42.6494	16.5543	30.943	36.3798	60.7345	0.114499	0.790011	0.999927	42.107	42.6858
Agap3	405.101	411.093	243.9	284.676	271.778	386.648	-0.151732	0.362655	0.999927	353.365	314.367
Agbl1	0	2.36941	0	0.884087	2.13999	2.56625	1.45341	0.462755	NA	0.789804	1.86344
Agbl2	2.39705	5.92353	3.31085	4.42044	6.41996	4.27708	0.368758	0.757447	NA	3.87714	5.03916
Agbl3	57.5292	68.7129	66.2171	62.7702	73.8296	53.0357	-0.032863	0.919914	0.999927	64.1531	63.2118
Agbl5	186.171	169.413	221.827	207.76	194.739	205.3	0.0850534	0.684433	0.999927	192.47	202.6
Ager	9.5882	4.73882	8.82895	7.95678	10.6999	20.53	0.714936	0.386077	0.999927	7.71866	13.0622
Agfg1	507.376	494.022	525.322	529.568	515.737	456.792	-0.0274841	0.848474	0.999927	508.907	500.699
Agfg2	500.184	544.965	497.732	614.44	438.697	517.526	0.0358404	0.838584	0.999927	514.294	523.555
Aggf1	551.321	476.252	571.674	540.177	497.547	488.442	-0.0632047	0.681244	0.999927	533.082	508.722
Agk	169.392	189.553	199.755	213.065	191.529	190.758	0.100779	0.630206	0.999927	186.233	198.45
Agl	1185.74	1172.86	1418.15	1319.94	1291.48	1100.06	-0.0193091	0.87521	0.999927	1258.92	1237.16
Agmat	21.5734	26.0635	18.7615	14.1454	27.8198	26.5179	0.0431856	0.938132	0.999927	22.1328	22.8277
Agmo	132.637	145.719	112.569	56.5816	138.029	92.3848	-0.445704	0.157914	0.999927	130.308	95.6652
Ago1	726.306	644.48	732.802	644.499	693.356	715.127	-0.0352401	0.798834	0.999927	701.196	684.328
Ago2	882.114	888.529	1020.85	992.83	969.414	1006.82	0.0967877	0.448814	0.999927	930.497	989.689
Ago3	302.028	354.227	388.474	333.301	445.117	402.901	0.183834	0.309185	0.999927	348.243	393.773
Ago4	285.249	255.896	357.572	259.037	370.218	317.359	0.0867015	0.654375	0.999927	299.573	315.538
Agpat1	521.758	604.2	329.982	420.825	395.898	581.682	-0.034948	0.821295	0.999927	485.313	466.135
Agpat2	185.372	633.817	169.957	195.383	512.527	217.275	-0.019338	0.9819	0.999927	329.716	308.395
Agpat3	592.87	842.326	566.156	556.091	578.867	609.056	-0.186667	0.259817	0.999927	667.117	581.338
Agpat4	30.3626	28.4329	13.2434	24.7544	13.9099	23.9516	-0.146049	0.783205	0.999927	24.013	20.872
Agpat5	366.749	451.373	413.857	523.38	363.798	316.504	-0.0456665	0.817303	0.999927	410.659	401.227
Agpat6	1558.88	1813.78	1345.31	1874.26	1783.68	1667.2	0.185423	0.177593	0.999927	1572.66	1775.05
Agpat9	99.0781	106.623	133.538	162.672	125.189	76.132	0.0735448	0.802118	0.999927	113.08	121.331
Agps	1295.21	1326.87	1493.2	1685.07	1270.08	1181.33	0.00186557	0.98909	0.999927	1371.76	1378.83
Agr2	385.925	438.341	302.391	237.819	129.469	141.999	-1.13891	1.4682e-06	0.0021468	375.552	169.763
Agrn	574.493	536.672	473.452	512.77	495.407	652.682	0.0628422	0.665032	0.999927	528.206	553.62
Agrp	2.39705	5.92353	0	3.53635	1.06999	2.56625	0.343961	0.841112	NA	2.77353	2.39086
Agt	1029.13	1267.63	769.222	1756.68	819.615	1374.65	0.40528	0.0817633	0.999927	1022	1316.98
Agtpbp1	459.435	486.914	482.281	570.236	517.877	490.153	0.145167	0.334129	0.999927	476.21	526.089
Agtr1a	9.5882	13.0318	7.72533	5.30452	10.6999	6.84332	-0.396538	0.647394	0.999927	10.1151	7.61593
Agtrap	640.811	657.512	635.684	611.788	712.616	721.97	0.081797	0.559642	0.999927	644.669	682.125
Ahctf1	1637.19	1663.33	1539.55	1566.6	2138.92	1753.6	0.173391	0.210607	0.999927	1613.35	1819.71
Ahcy	135.034	159.935	108.155	146.758	130.539	155.686	0.119588	0.624816	0.999927	134.375	144.328
Ahcyl1	2573.63	2734.3	3073.58	2551.48	3184.3	2644.09	0.0025313	0.982541	0.999927	2793.84	2793.29
Ahcyl2	1070.68	1088.74	1357.45	1095.38	1191.97	1015.38	-0.0811329	0.501599	0.999927	1172.29	1100.91
Ahdc1	220.529	217.986	162.232	157.367	151.939	281.432	-0.0604001	0.776413	0.999927	200.249	196.913
Ahi1	80.7007	55.6812	77.2533	68.9588	56.7097	50.4695	-0.283667	0.41009	0.999927	71.2117	58.7127
Ahnak	9291.76	11105.4	10389.5	11887.4	11845.9	10588.3	0.158154	0.166382	0.999927	10262.2	11440.6
Ahr	365.151	342.38	430.411	384.578	368.078	378.094	-0.00341505	0.983822	0.999927	379.314	376.916
Ahrr	3.99508	3.55412	2.20724	0.884087	2.13999	3.42166	-0.621491	0.652424	NA	3.25215	2.14858
Ahsa1	1304	1633.71	1157.7	1324.36	1320.37	1376.36	-0.0168216	0.897672	0.999927	1365.13	1340.37
Ahsa2	230.916	232.202	304.599	305.01	253.589	224.119	0.0439315	0.821152	0.999927	255.906	260.906
AI118078	23.1715	11.8471	17.6579	29.1749	10.6999	19.6746	0.167736	0.79488	0.999927	17.5588	19.8498
AI182371	5.59312	1.18471	2.20724	3.53635	2.13999	5.13249	0.226548	0.8666	NA	2.99502	3.60294
AI197445	9.5882	7.10823	16.5543	14.1454	11.7699	5.13249	-0.102561	0.893536	0.999927	11.0836	10.3493
AI314180	3426.98	3427.35	4449.79	3541.65	4200.8	3561.95	0.0126633	0.904117	0.999927	3768.04	3768.13
AI317395	3.19607	1.18471	2.20724	0	10.6999	0	-0.114367	0.942623	NA	2.196	3.56665
AI413582	96.681	87.6682	77.2533	77.7997	66.3396	102.65	-0.0995712	0.732806	0.999927	87.2008	82.263
AI414108	13.5833	9.47764	13.2434	12.3772	9.62994	17.1083	0.0856408	0.905135	0.999927	12.1014	13.0385
AI427809	26.3675	13.0318	22.0724	38.0157	16.0499	11.1204	0.0263284	0.968078	0.999927	20.4906	21.7287
AI429214	11.9852	17.7706	18.7615	20.334	17.1199	14.5421	0.115706	0.855505	0.999927	16.1724	17.332
AI450353	8.78918	4.73882	8.82895	13.2613	10.6999	9.40957	0.571462	0.48959	0.999927	7.45232	11.1236
AI463170	138.23	135.056	119.191	113.163	127.329	129.168	-0.0859464	0.725663	0.999927	130.826	123.22
AI464131	194.96	235.756	188.719	228.979	204.369	222.408	0.0931211	0.653126	0.999927	206.478	218.585
AI467606	66.3184	43.8341	15.4507	15.0295	18.1899	21.3854	-1.01993	0.0331297	0.999927	41.8677	18.2016
AI504432	65.5194	27.2482	26.4868	31.8271	31.0298	35.9274	-0.224198	0.586364	0.999927	39.7515	32.9281
AI506816	67.1174	52.127	33.1085	71.611	51.3597	62.4453	0.316172	0.39653	0.999927	50.7843	61.8054
AI507597	5.59312	8.29294	19.8651	13.2613	13.9099	8.55415	0.240091	0.74959	0.999927	11.2504	11.9085
AI597479	403.503	409.908	470.141	392.535	444.047	367.829	-0.0919645	0.56631	0.999927	427.851	401.47
AI606473	0.799017	2.36941	0	0	1.06999	0	-1.4376	0.569211	NA	1.05614	0.356665
AI607873	139.029	106.623	115.88	111.395	100.579	112.059	-0.161837	0.540243	0.999927	120.511	108.011
AI661453	356.361	330.533	364.194	307.662	316.718	378.949	-0.0699002	0.696099	0.999927	350.363	334.443
AI662270	87.0928	41.4647	45.2483	55.6975	38.5198	43.6262	-0.32827	0.344253	0.999927	57.9353	45.9478
AI837181	205.347	193.107	135.745	140.57	141.239	202.733	-0.142523	0.515588	0.999927	178.066	161.514
AI839979	1.59803	1.18471	2.20724	4.42044	4.27997	4.27708	1.40677	0.28637	NA	1.66333	4.32583
AI846148	135.034	174.152	142.367	180.354	116.629	164.24	0.0363661	0.885157	0.999927	150.517	153.741
AI847159	0.799017	0	1.10362	0.884087	2.13999	1.71083	1.42201	0.554177	NA	0.634212	1.5783
AI854703	4.7941	1.18471	1.10362	6.18861	5.34997	5.98791	1.39233	0.273782	NA	2.36081	5.84216
AI987944	226.921	206.139	247.21	274.067	240.749	237.805	0.141613	0.452464	0.999927	226.757	250.874
Aicda	13.5833	0	2.20724	1.76817	0	0	-3.07714	0.110293	NA	5.26351	0.589391
Aida	303.626	289.068	339.914	378.389	343.468	327.624	0.168407	0.310595	0.999927	310.87	349.827
Aif1	90.2889	84.1141	62.9062	73.3792	63.1296	100.939	-0.0103236	0.973332	0.999927	79.1031	79.1493
Aif1l	31.9607	46.2035	20.9687	26.5226	29.9598	23.9516	-0.245488	0.61671	0.999927	33.0443	26.8114
Aifm1	579.287	656.327	642.306	692.24	690.146	636.429	0.111878	0.438133	0.999927	625.973	672.938
Aifm2	186.97	334.087	171.061	183.89	282.478	201.878	-0.0244515	0.930335	0.999927	230.706	222.749
Aifm3	63.1223	69.8976	41.9375	45.0884	57.7797	63.3007	-0.0554932	0.873014	0.999927	58.3191	55.3896
Aig1	230.117	259.451	261.558	285.56	246.099	218.131	3.2221e-06	0.999987	0.999987	250.375	249.93
Aim1	696.743	725.04	767.015	929.175	689.076	774.151	0.135206	0.390839	0.999927	729.599	797.467
Aim1l	9.5882	15.4012	8.82895	8.84087	6.41996	11.9758	-0.314912	0.663427	0.999927	11.2728	9.07888
Aim2	51.1371	24.8788	26.4868	23.8703	32.0998	37.6383	-0.101365	0.818973	0.999927	34.1676	31.2028
Aimp1	593.669	550.888	661.067	663.065	573.517	548.321	-0.0165627	0.908634	0.999927	601.875	594.968
Aimp2	162.999	195.476	125.812	199.804	142.309	193.324	0.160849	0.488284	0.999927	161.429	178.479
Aip	230.916	229.833	125.812	189.195	132.679	222.408	-0.0845723	0.697377	0.999927	195.52	181.427
Aire	2.39705	0	0	0.884087	2.13999	0.855415	1.01998	0.638974	NA	0.799017	1.29316
Airn	97.48	74.6364	144.574	152.947	147.659	115.481	0.426336	0.0918174	0.999927	105.563	138.696
Ajap1	8.78918	1.18471	3.31085	3.53635	3.20998	8.55415	0.0389181	0.975001	NA	4.42825	5.10016
Ajuba	133.436	131.502	134.641	90.1769	151.939	139.433	-0.0734453	0.779551	0.999927	133.193	127.183
AK010878	77.5046	65.1588	56.2845	68.9588	69.5496	60.7345	0.000127872	0.999687	0.999927	66.316	66.4143
Ak1	113.46	151.642	123.605	104.322	103.789	183.914	-0.0192969	0.9425	0.999927	129.569	130.675
Ak2	613.645	643.295	438.136	633.89	602.406	562.863	0.104011	0.519939	0.999927	565.025	599.72
Ak3	3449.35	3762.62	3659.6	3174.76	3853.05	3112.86	-0.101523	0.382214	0.999927	3623.86	3380.22
Ak4	290.043	337.641	201.962	251.081	362.728	364.407	0.261066	0.1966	0.999927	276.549	326.072
Ak5	23.9705	13.0318	16.5543	14.1454	11.7699	5.13249	-0.850904	0.195986	0.999927	17.8522	10.3493
Ak6	127.044	170.598	153.403	170.629	148.729	116.336	-0.0640696	0.798327	0.999927	150.348	145.231
Ak7	1.59803	1.18471	2.20724	1.76817	2.13999	1.71083	0.193407	0.911504	NA	1.66333	1.873
Ak8	3.19607	0	2.20724	0	0	1.71083	-1.90252	0.407735	NA	1.8011	0.570277
Akap1	721.512	1004.63	625.752	911.494	940.524	964.053	0.281301	0.0740696	0.999927	783.965	938.69
Akap10	572.096	544.965	646.72	577.309	603.476	556.875	-0.0193611	0.889397	0.999927	587.927	579.22
Akap11	1361.52	1312.65	1703.99	1521.51	1750.51	1376.36	0.0917839	0.421997	0.999927	1459.39	1549.46
Akap12	279.656	286.699	216.309	148.527	178.689	199.312	-0.569241	0.00415146	0.5841	260.888	175.509
Akap13	7183.96	7152.07	8067.45	6715.52	8718.31	8619.16	0.105944	0.359756	0.999927	7467.83	8017.67
Akap14	2.39705	0	3.31085	0.884087	2.13999	2.56625	0.240505	0.901359	NA	1.90263	1.86344
Akap17b	544.929	425.309	669.896	808.056	591.707	440.539	0.170007	0.381996	0.999927	546.712	613.434
Akap2	0.799017	1.18471	2.20724	0	2.13999	0.855415	-0.478008	0.843435	NA	1.39699	0.998468
Akap5	21.5734	21.3247	25.3832	39.7839	22.4699	14.5421	0.136682	0.792328	0.999927	22.7605	25.5986
Akap6	27.1666	43.8341	30.9013	30.059	18.1899	17.1083	-0.620171	0.236024	0.999927	33.9673	21.7857
Akap7	582.483	671.728	898.345	638.311	939.454	740.79	0.129265	0.4462	0.999927	717.519	772.852
Akap8	1233.68	1185.89	1382.83	1602.85	1654.21	1465.33	0.31636	0.00494818	0.610239	1267.47	1574.13
Akap8l	300.43	228.648	339.914	335.953	365.938	329.335	0.255071	0.155737	0.999927	289.664	343.742
Akap9	4114.94	3780.4	5212.39	4846.56	5265.44	4478.95	0.170795	0.104143	0.999927	4369.24	4863.65
Akip1	174.186	170.598	180.993	151.179	149.799	157.396	-0.196413	0.361267	0.999927	175.259	152.791
Akirin1	423.479	463.22	387.37	524.264	570.307	425.141	0.245017	0.152386	0.999927	424.69	506.571
Akirin2	457.837	443.08	520.908	419.941	494.337	414.021	-0.0960923	0.529889	0.999927	473.941	442.766
Akna	234.112	90.0376	92.7039	70.727	72.7596	159.963	-0.475576	0.190992	0.999927	138.951	101.15
Akr1a1	3366.26	3481.85	3180.63	3149.12	3078.37	3413.96	-0.057839	0.571442	0.999927	3342.91	3213.82
Akr1b10	510.572	536.672	574.985	601.179	576.727	497.852	0.0457279	0.7503	0.999927	540.743	558.586
Akr1b7	1.59803	3.55412	2.20724	3.53635	0	3.42166	-0.187854	0.906176	NA	2.45313	2.31934
Akr1b8	59.9262	47.3882	57.3881	115.815	44.9397	39.3491	0.250805	0.565292	0.999927	54.9009	66.7014
Akr1c12	92.6859	110.178	108.155	78.6837	79.1795	82.1199	-0.370159	0.190767	0.999927	103.673	79.9944
Akr1c13	189.367	217.986	236.174	167.977	221.489	181.348	-0.172892	0.429429	0.999927	214.509	190.271
Akr1c14	53.5341	56.8659	33.1085	57.4657	47.0797	34.2166	-0.0236286	0.955806	0.999927	47.8362	46.254
Akr1c18	0.799017	0	2.20724	1.76817	1.06999	0.855415	0.634825	0.790181	NA	1.00208	1.23119
Akr1c19	3.99508	2.36941	2.20724	0.884087	2.13999	1.71083	-0.8526	0.595914	NA	2.85724	1.5783
Akr1c21	2.39705	3.55412	8.82895	3.53635	1.06999	2.56625	-0.810435	0.527497	NA	4.9267	2.39086
Akr1cl	11.1862	2.36941	6.62171	11.4931	14.9799	7.69874	0.699003	0.382903	0.999927	6.72578	11.3906
Akr1e1	193.362	214.432	249.418	236.935	233.259	191.613	0.0131842	0.946788	0.999927	219.07	220.602
Akr7a5	180.578	251.158	141.263	120.236	157.289	222.408	-0.195596	0.409026	0.999927	190.999	166.644
Akt1	2139.77	2133.65	1403.8	2014.83	1457.33	2242.04	0.0206582	0.874991	0.999927	1892.41	1904.74
Akt1s1	222.926	248.788	173.268	236.935	194.739	263.468	0.116667	0.556972	0.999927	214.994	231.714
Akt2	704.733	831.663	644.513	675.442	680.516	733.091	-0.058027	0.676633	0.999927	726.97	696.35
Akt3	424.278	402.8	406.131	335.953	434.417	315.648	-0.194447	0.270544	0.999927	411.07	362.006
Aktip	728.703	778.352	740.528	743.517	897.725	747.633	0.0839147	0.562589	0.999927	749.194	796.292
Alad	252.489	298.546	167.75	238.703	222.559	251.492	0.018557	0.928905	0.999927	239.595	237.585
Alas1	1851.32	2166.83	1137.83	1253.64	1879.98	2281.39	0.0997845	0.525552	0.999927	1718.66	1805
Alas2	155.808	126.763	144.574	128.193	177.619	170.228	0.151656	0.554816	0.999927	142.382	158.68
Alb	0.799017	4.73882	2.20724	0.884087	2.13999	0.855415	-0.973858	0.612416	NA	2.58169	1.29316
Alcam	1551.69	1460.74	1857.39	1585.17	1017.56	867.391	-0.494293	0.0040202	0.580158	1623.27	1156.71
Aldh16a1	169.392	199.031	96.0148	129.077	99.5094	201.878	-0.101654	0.660528	0.999927	154.812	143.488
Aldh18a1	2032.7	1703.61	1549.48	3292.34	1580.38	1822.89	0.354014	0.3527	0.999927	1761.93	2231.87
Aldh1a1	1252.86	1519.98	883.998	1349.12	1732.32	1514.09	0.364478	0.0268794	0.999927	1218.94	1531.84
Aldh1a2	16.7793	26.0635	7.72533	30.059	10.6999	22.2408	0.437176	0.498258	0.999927	16.8561	20.9999
Aldh1a3	523.356	428.863	694.176	486.248	739.366	579.116	0.152534	0.423212	0.999927	548.798	601.577
Aldh1a7	1093.85	1203.66	871.858	848.724	1062.5	989.715	-0.114597	0.427651	0.999927	1056.46	966.981
Aldh1b1	77.5046	63.9741	75.046	78.6837	38.5198	65.867	-0.23903	0.510332	0.999927	72.1749	61.0235
Aldh1l1	731.899	695.422	669.896	346.562	605.616	896.475	-0.23434	0.268261	0.999927	699.073	616.218
Aldh1l2	1711.49	1067.42	1079.34	1914.05	1018.63	721.115	-0.100023	0.832922	0.999927	1286.08	1217.93
Aldh2	1826.55	2156.16	1250.4	1242.14	1499.06	2011.94	-0.1265	0.325031	0.999927	1744.37	1584.38
Aldh3a1	98.279	61.6047	43.0411	62.7702	31.0298	45.337	-0.494948	0.226199	0.999927	67.6416	46.379
Aldh3a2	2004.73	1929.89	2135.5	2088.21	2156.04	1982.85	0.0411768	0.707934	0.999927	2023.37	2075.7
Aldh3b1	51.9361	26.0635	14.347	27.4067	21.3999	41.0599	0.0221869	0.962818	0.999927	30.7822	29.9555
Aldh3b2	528.949	547.334	503.25	488.9	509.317	697.163	0.0921187	0.540623	0.999927	526.511	565.127
Aldh4a1	616.042	646.849	392.888	381.041	508.247	695.453	-0.060646	0.713822	0.999927	551.926	528.247
Aldh5a1	284.45	245.234	337.707	311.199	282.478	254.914	-0.0204779	0.9128	0.999927	289.13	282.864
Aldh6a1	2740.63	3315.99	3267.81	1883.99	3655.1	2749.3	-0.170429	0.346354	0.999927	3108.14	2762.8
Aldh7a1	1635.59	1662.14	1580.38	1745.19	1219.79	1651.81	-0.0771813	0.593168	0.999927	1626.04	1538.93
Aldh8a1	20.7744	29.6176	2.20724	2.65226	18.1899	18.8191	0.0196778	0.979446	0.999927	17.5331	13.2204
Aldh9a1	960.418	877.867	918.21	816.012	908.425	918.716	-0.061905	0.630348	0.999927	918.832	881.051
Aldoa	8010.14	9780.93	6546.66	7220.34	7255.63	8650.81	-0.0629496	0.569997	0.999927	8112.58	7708.93
Aldob	0.799017	0	2.20724	0	0	0	-2.17895	0.47877	NA	1.00208	0
Aldoc	183.774	143.349	171.061	118.468	113.419	146.276	-0.405376	0.10396	0.999927	166.061	126.054
Alg1	266.872	276.036	219.62	275.835	213.999	272.877	0.00380717	0.98401	0.999927	254.176	254.237
Alg10b	562.508	526.009	682.036	660.413	592.777	502.129	-0.00742441	0.95933	0.999927	590.184	585.106
Alg11	739.09	807.969	850.89	826.621	888.095	682.621	-0.00637147	0.962091	0.999927	799.316	799.113
Alg12	139.029	159.935	111.465	178.586	126.259	132.589	0.101042	0.691536	0.999927	136.81	145.811
Alg13	107.867	100.7	118.087	150.295	113.419	106.071	0.170793	0.49929	0.999927	108.885	123.262
Alg14	269.269	279.591	283.63	300.59	258.938	214.709	-0.115127	0.541083	0.999927	277.496	258.079
Alg2	368.347	335.272	382.956	377.505	374.498	398.624	0.0827677	0.6073	0.999927	362.191	383.542
Alg3	117.455	143.349	79.4605	155.599	108.069	124.035	0.233585	0.445938	0.999927	113.422	129.235
Alg5	987.585	1132.58	1079.34	1309.33	865.625	995.703	-0.0195578	0.901818	0.999927	1066.5	1056.89
Alg6	302.028	328.163	388.474	309.43	297.458	274.588	-0.200523	0.232815	0.999927	339.555	293.826
Alg8	94.284	108.993	115.88	157.367	115.559	106.927	0.259076	0.341339	0.999927	106.386	126.618
Alg9	600.062	582.875	535.255	673.674	520.017	546.61	0.0214918	0.894532	0.999927	572.73	580.101
Alk	4.7941	2.36941	3.31085	6.18861	1.06999	1.71083	-0.250446	0.855776	NA	3.49146	2.98981
Alkbh1	148.617	149.273	186.511	217.485	189.389	142.854	0.176916	0.409351	0.999927	161.467	183.243
Alkbh2	42.3479	58.0506	36.4194	45.0884	38.5198	61.5899	0.0864123	0.822436	0.999927	45.606	48.3994
Alkbh3	159.004	185.999	200.859	231.631	195.809	192.468	0.188231	0.366035	0.999927	181.954	206.636
Alkbh4	56.7302	67.5282	43.0411	65.4224	72.7596	65.867	0.30121	0.376763	0.999927	55.7665	68.0163
Alkbh5	3963.12	4231.77	4727.9	3487.72	4812.83	4210.35	-0.0410098	0.732734	0.999927	4307.6	4170.3
Alkbh6	150.215	154.012	110.362	141.454	115.559	151.409	-0.0150543	0.948607	0.999927	138.196	136.141
Alkbh7	69.5144	72.267	51.8701	60.1179	36.3798	60.7345	-0.303422	0.387581	0.999927	64.5505	52.4107
Alkbh8	154.21	162.305	186.511	192.731	187.249	135.156	0.0215458	0.922756	0.999927	167.675	171.712
Alms1	162.2	135.056	204.169	175.933	157.289	132.589	-0.0985687	0.655237	0.999927	167.142	155.271
Alox12	496.988	508.239	475.659	375.737	521.087	496.996	-0.0885435	0.596183	0.999927	493.629	464.607
Alox12e	2.39705	3.55412	0	0.884087	2.13999	5.13249	0.819924	0.625695	NA	1.98372	2.71886
Alox5	18.3774	29.6176	25.3832	16.7977	16.0499	24.807	-0.355903	0.534998	0.999927	24.4594	19.2182
Alox5ap	87.0928	73.4517	46.352	79.5678	38.5198	71.8549	-0.112887	0.74899	0.999927	68.9655	63.3142
Alox8	1.59803	1.18471	0	0	3.20998	0.855415	0.90578	0.695285	NA	0.92758	1.35513
Aloxe3	1.59803	1.18471	1.10362	3.53635	1.06999	0	-0.0206024	0.991759	NA	1.29545	1.53545
Alpk1	200.553	178.891	230.656	201.572	226.839	182.203	0.00226331	0.991214	0.999927	203.367	203.538
Alpk2	4.7941	0	1.10362	0	0	0.855415	-2.40477	0.316281	NA	1.96591	0.285138
Alpk3	8.78918	16.5859	5.51809	5.30452	11.7699	7.69874	-0.238584	0.773489	0.999927	10.2977	8.25773
Alpl	72.7105	98.3306	55.1809	95.4814	78.1095	110.349	0.356682	0.247916	0.999927	75.4073	94.6465
Als2	285.249	355.412	333.293	332.417	377.708	339.6	0.115456	0.508199	0.999927	324.651	349.908
Als2cl	253.288	216.801	228.449	293.517	284.618	302.817	0.331589	0.0710074	0.999927	232.846	293.651
Als2cr12	11.9852	7.10823	13.2434	6.18861	5.34997	6.84332	-0.795258	0.327726	0.999927	10.779	6.1273
Alx4	24.7695	42.6494	43.0411	20.334	25.6798	26.5179	-0.588209	0.227365	0.999927	36.82	24.1772
Alyref	446.65	485.729	350.951	483.596	390.548	391.78	-0.008171	0.964649	0.999927	427.777	421.974
Alyref2	47.941	56.8659	28.6941	37.1317	34.2398	34.2166	-0.291274	0.488406	0.999927	44.5003	35.196
Amacr	124.647	127.948	108.155	116.699	112.349	100.939	-0.129182	0.622463	0.999927	120.25	109.996
Ambra1	614.444	576.952	606.99	655.108	663.396	733.091	0.190081	0.171838	0.999927	599.462	683.865
Amdhd2	115.058	92.407	50.7664	53.9293	52.4297	96.6619	-0.342364	0.260694	0.999927	86.0773	67.6736
Amelx	0	1.18471	5.51809	3.53635	1.06999	0	0.0530457	0.97854	NA	2.23427	1.53545
Amer1	353.964	311.578	456.898	411.985	403.388	320.781	0.0284284	0.861119	0.999927	374.147	378.718
Amer2	12.7843	7.10823	17.6579	7.95678	6.41996	11.9758	-0.476589	0.525362	0.999927	12.5168	8.78419
Amer3	2.39705	0	0	1.76817	0	0.855415	0.331835	0.910751	NA	0.799017	0.87453
Amfr	3346.28	3962.84	3443.29	3988.12	3494.6	3494.37	0.0340118	0.77587	0.999927	3584.14	3659.03
Amh	4.7941	2.36941	0	1.76817	1.06999	0.855415	-0.0986491	0.961043	NA	2.38784	1.23119
Amhr2	98.279	88.8529	52.9737	54.8134	52.4297	54.7466	-0.531221	0.119574	0.999927	80.0352	53.9966
Amica1	28.7646	17.7706	16.5543	14.1454	12.8399	30.7949	-0.173033	0.776358	0.999927	21.0298	19.2601
Amigo1	422.68	427.679	420.479	419.057	445.117	446.527	0.0469522	0.760302	0.999927	423.612	436.9
Amigo2	83.0977	75.8212	90.4967	81.336	65.2696	71.8549	-0.185363	0.541696	0.999927	83.1385	72.8202
Amigo3	157.406	183.629	147.885	155.599	131.609	133.445	-0.199626	0.404986	0.999927	162.973	140.218
Ammecr1	84.6958	84.1141	98.222	89.2928	73.8296	80.409	-0.129108	0.661751	0.999927	89.0106	81.1771
Ammecr1l	516.165	612.493	653.342	560.511	711.546	576.55	0.0569161	0.708082	0.999927	594	616.202
Amn	8.78918	7.10823	5.51809	7.95678	5.34997	6.84332	-0.0849125	0.923346	0.999927	7.1385	6.71669
Amn1	109.465	164.674	165.543	136.149	147.659	117.192	-0.13486	0.59663	0.999927	146.561	133.667
Amot	1061.89	1049.65	1438.01	1449.9	1337.49	1234.36	0.199751	0.106888	0.999927	1183.19	1340.59
Amotl1	1347.14	1416.91	1453.47	1220.92	1542.93	1615.88	0.0555199	0.65635	0.999927	1405.84	1459.91
Amotl2	285.249	312.762	284.733	222.79	258.938	305.383	-0.168383	0.351821	0.999927	294.248	262.371
Ampd1	0	11.8471	0	0.884087	0	0	-2.81493	0.212873	NA	3.94902	0.294696
Ampd2	155.009	170.598	115.88	236.935	148.729	171.083	0.359754	0.169455	0.999927	147.162	185.582
Ampd3	153.411	144.534	173.268	153.831	195.809	174.505	0.156813	0.478023	0.999927	157.071	174.715
Amph	7.99017	4.73882	8.82895	5.30452	5.34997	4.27708	-0.52065	0.622811	0.999927	7.18598	4.97719
Amt	524.954	595.907	574.985	651.572	522.157	579.972	0.0522064	0.739154	0.999927	565.282	584.567
Amtn	56.7302	67.5282	24.2796	86.6405	41.7298	36.7829	0.239156	0.655508	0.999927	49.5127	55.051
Amy1	78199.8	59407.1	113501	37442	17501.9	79854.7	-0.994057	0.22326	0.999927	83702.4	44932.9
Amz1	23.9705	20.14	22.0724	23.8703	16.0499	17.1083	-0.225509	0.684898	0.999927	22.061	19.0095
Amz2	428.273	452.558	558.431	409.332	477.217	481.599	-0.0604796	0.710231	0.999927	479.754	456.049
Anapc1	1711.49	1705.98	1823.18	1997.15	2066.16	1792.09	0.159784	0.144811	0.999927	1746.88	1951.8
Anapc10	86.2938	93.5917	120.294	97.2496	117.699	91.5294	0.0369136	0.890665	0.999927	100.06	102.159
Anapc11	128.642	142.165	80.5641	84.8724	87.7395	137.722	-0.174871	0.502885	0.999927	117.123	103.445
Anapc13	385.126	458.481	356.469	342.142	327.418	359.274	-0.220882	0.181781	0.999927	400.025	342.945
Anapc15	98.279	117.286	84.9786	122.004	106.999	89.8186	0.0845619	0.762715	0.999927	100.181	106.274
Anapc16	266.073	234.572	218.516	284.676	267.498	299.395	0.239314	0.189654	0.999927	239.72	283.857
Anapc2	475.415	411.093	418.271	463.262	464.377	476.466	0.10388	0.497099	0.999927	434.926	468.035
Anapc4	648.802	598.276	721.766	726.72	658.046	601.357	0.0114157	0.933078	0.999927	656.281	662.041
Anapc5	2460.17	2564.89	2181.85	2101.47	2403.21	2522.62	-0.0339675	0.757255	0.999927	2402.3	2342.43
Anapc7	418.685	400.43	368.608	351.867	422.648	497.852	0.0922929	0.578398	0.999927	395.908	424.122
Ang	28.7646	31.987	18.7615	23.8703	29.9598	26.5179	0.0351106	0.946422	0.999927	26.5044	26.7827
Angel1	217.333	184.814	187.615	222.79	171.199	188.191	-0.0155875	0.945405	0.999927	196.587	194.06
Angel2	627.228	681.206	673.207	698.429	751.136	605.634	0.0511143	0.721748	0.999927	660.547	685.066
Angpt1	147.818	206.139	192.03	189.195	169.059	122.324	-0.189584	0.444666	0.999927	181.995	160.193
Angpt2	23.1715	14.2165	15.4507	18.5658	23.5399	15.3975	0.102031	0.854749	0.999927	17.6129	19.1677
Angpt4	3.99508	3.55412	1.10362	0.884087	0	0	-2.99181	0.253487	NA	2.88427	0.294696
Angptl1	19.9754	4.73882	4.41447	5.30452	5.34997	7.69874	-0.545978	0.497549	0.999927	9.70957	6.11774
Angptl2	345.175	438.341	286.941	279.371	381.988	324.202	-0.102054	0.605109	0.999927	356.819	328.521
Angptl3	9.5882	7.10823	18.7615	13.2613	11.7699	7.69874	-0.0409208	0.955279	0.999927	11.8193	10.91
Angptl4	11.1862	112.547	34.2122	24.7544	52.4297	7.69874	-1.1348	0.11662	0.999927	52.6485	28.2943
Angptl6	7.19115	9.47764	2.20724	3.53635	6.41996	7.69874	0.0544394	0.959664	0.999927	6.29201	5.88502
Angptl7	9.5882	8.29294	7.72533	7.0727	18.1899	17.1083	0.717076	0.33043	0.999927	8.53549	14.1236
Ank	296.435	484.545	283.63	243.124	370.218	342.166	-0.139676	0.540036	0.999927	354.87	318.503
Ank1	5.59312	10.6623	7.72533	2.65226	3.20998	3.42166	-1.37852	0.202148	NA	7.9936	3.09463
Ank2	520.16	306.839	499.939	453.537	106.999	101.794	-1.04524	0.14268	0.999927	442.313	220.777
Ank3	2429.81	2455.89	2877.13	1904.32	3091.21	2919.53	0.0301237	0.841263	0.999927	2587.61	2638.36
Ankdd1b	25.5685	34.3565	33.1085	32.7112	42.7997	23.9516	0.0827274	0.864404	0.999927	31.0112	33.1542
Ankef1	2.39705	8.29294	1.10362	1.76817	12.8399	0.855415	0.250455	0.849122	NA	3.9312	5.1545
Ankfy1	1221.7	1187.07	1127.9	1337.62	1245.47	1152.24	0.0773722	0.532103	0.999927	1178.89	1245.11
Ankhd1	1924.83	1724.93	2198.41	1980.35	2495.23	2052.14	0.163167	0.184369	0.999927	1949.39	2175.91
Ankib1	1003.56	1055.57	1095.89	1154.62	1142.75	1087.23	0.102088	0.388389	0.999927	1051.68	1128.2
Ankle1	3.99508	5.92353	2.20724	2.65226	1.06999	2.56625	-0.882144	0.506345	NA	4.04195	2.09617
Ankle2	1480.58	1440.6	1811.04	1404.81	1725.9	1474.74	-0.0312565	0.795903	0.999927	1577.41	1535.15
Ankmy1	2.39705	2.36941	3.31085	1.76817	3.20998	5.98791	0.379501	0.788264	NA	2.69244	3.65535
Ankmy2	451.444	374.367	443.655	410.216	511.457	420.009	0.0763764	0.646112	0.999927	423.155	447.227
Ankra2	313.215	290.253	346.536	302.358	348.818	308.805	0.0162479	0.924593	0.999927	316.668	319.994
Ankrd10	476.214	509.423	557.327	541.061	663.396	609.056	0.236649	0.123927	0.999927	514.322	604.504
Ankrd11	1669.94	1531.82	1538.44	1385.36	1588.94	1748.47	-0.00742526	0.953679	0.999927	1580.07	1574.26
Ankrd12	826.982	785.46	932.557	800.983	1073.2	878.511	0.114993	0.415411	0.999927	848.333	917.566
Ankrd13a	2057.47	2162.09	1818.76	2071.42	1937.76	2351.54	0.0770748	0.472131	0.999927	2012.77	2120.24
Ankrd13b	44.7449	50.9423	28.6941	55.6975	38.5198	57.3128	0.321429	0.421821	0.999927	41.4604	50.51
Ankrd13c	615.243	732.148	729.492	677.211	783.235	640.706	0.0162901	0.909366	0.999927	692.294	700.384
Ankrd13d	19.9754	20.14	11.0362	19.4499	13.9099	21.3854	0.1266	0.833382	0.999927	17.0505	18.2484
Ankrd16	127.044	101.885	165.543	137.033	129.469	128.312	0.0243648	0.919011	0.999927	131.49	131.605
Ankrd17	2325.94	1972.53	2707.18	2263.26	2470.62	2342.98	0.0257091	0.830934	0.999927	2335.22	2358.95
Ankrd2	1.59803	0	2.20724	0.884087	2.13999	0	-0.633744	0.770421	NA	1.26842	1.00802
Ankrd22	78.3036	90.0376	124.709	154.715	128.399	96.6619	0.385166	0.141027	0.999927	97.6834	126.592
Ankrd23	102.274	78.1906	72.8388	97.2496	130.539	164.24	0.615286	0.035564	0.999927	84.4345	130.676
Ankrd24	307.621	249.973	332.189	370.432	371.288	420.009	0.389611	0.0337825	0.999927	296.594	387.243
Ankrd26	157.406	138.611	172.164	183.89	171.199	177.926	0.191918	0.381049	0.999927	156.06	177.672
Ankrd27	659.988	631.448	688.658	602.947	613.106	668.935	-0.0693462	0.627229	0.999927	660.031	628.329
Ankrd28	745.483	751.103	878.48	985.757	925.545	753.621	0.164003	0.208167	0.999927	791.689	888.307
Ankrd29	21.5734	15.4012	23.176	21.2181	9.62994	17.9637	-0.300469	0.650262	0.999927	20.0502	16.2706
Ankrd32	186.171	185.999	224.034	198.035	205.439	141.999	-0.144288	0.4822	0.999927	198.735	181.824
Ankrd33b	191.764	151.642	169.957	90.1769	269.638	236.095	0.207549	0.515743	0.999927	171.121	198.637
Ankrd35	22.3725	13.0318	16.5543	22.1022	7.48996	23.0962	-0.0166243	0.980475	0.999927	17.3195	17.5628
Ankrd37	20.7744	14.2165	16.5543	13.2613	21.3999	13.6866	-0.114285	0.855203	0.999927	17.1817	16.1159
Ankrd39	65.5194	61.6047	64.0099	65.4224	86.6695	70.1441	0.21233	0.506959	0.999927	63.7113	74.0787
Ankrd40	902.889	1037.8	957.941	999.902	1083.9	1039.33	0.110087	0.38505	0.999927	966.21	1041.05
Ankrd42	43.9459	27.2482	51.8701	55.6975	32.0998	37.6383	0.0472593	0.916186	0.999927	41.0214	41.8119
Ankrd44	340.381	216.801	206.377	173.281	199.019	246.36	-0.297317	0.206605	0.999927	254.52	206.22
Ankrd46	464.229	428.863	442.551	447.348	450.467	455.081	0.0182645	0.903523	0.999927	445.214	450.965
Ankrd49	190.965	175.336	192.03	279.371	242.889	189.047	0.33117	0.0914765	0.999927	186.11	237.102
Ankrd50	197.357	208.508	206.377	166.208	202.229	195.89	-0.116732	0.570412	0.999927	204.081	188.109
Ankrd52	279.656	283.145	280.319	251.965	264.288	352.431	0.0344584	0.852947	0.999927	281.04	289.561
Ankrd53	8.78918	4.73882	7.72533	3.53635	2.13999	7.69874	-0.760678	0.50067	NA	7.08444	4.45836
Ankrd54	144.622	139.795	72.8388	109.627	94.1594	142.854	-0.00939931	0.970691	0.999927	119.085	115.547
Ankrd55	6.39213	1.18471	3.31085	1.76817	0	1.71083	-1.64924	0.34609	NA	3.62923	1.15967
Ankrd6	108.666	94.7764	119.191	109.627	92.0195	98.3728	-0.10057	0.705168	0.999927	107.544	100.006
Ankrd61	7.99017	7.10823	16.5543	15.0295	17.1199	6.84332	0.3148	0.6673	0.999927	10.5509	12.9976
Ankrd9	95.083	145.719	73.9424	69.8429	102.719	132.589	-0.0294634	0.920266	0.999927	104.915	101.717
Anks1	399.508	370.813	303.495	344.794	300.668	368.684	-0.0780176	0.64622	0.999927	357.939	338.049
Anks1b	6.39213	3.55412	2.20724	0.884087	1.06999	5.13249	-0.969573	0.466895	NA	4.05116	2.36219
Anks3	246.097	226.279	245.003	276.719	268.568	310.516	0.252564	0.165362	0.999927	239.126	285.268
Anks6	50.338	26.0635	36.4194	42.4362	33.1698	42.7708	0.0562974	0.89819	0.999927	37.607	39.4589
Ankzf1	217.333	199.031	309.013	277.603	311.368	264.323	0.260217	0.154037	0.999927	241.792	284.432
Anln	47.941	30.8023	60.699	27.4067	43.8697	56.4574	-0.103927	0.809561	0.999927	46.4808	42.5779
Ano1	3828.89	3878.73	4567.88	4962.38	4526.07	4502.91	0.204628	0.128701	0.999927	4091.83	4663.79
Ano10	319.607	297.361	329.982	295.285	292.108	277.155	-0.12982	0.452506	0.999927	315.65	288.183
Ano3	0.799017	1.18471	2.20724	3.53635	1.06999	0	0.0167691	0.994036	NA	1.39699	1.53545
Ano4	23.9705	24.8788	23.176	19.4499	35.3098	37.6383	0.348342	0.483484	0.999927	24.0084	30.7993
Ano6	609.65	499.946	622.441	717.879	525.367	528.647	0.0346011	0.839645	0.999927	577.345	590.631
Ano7	3.19607	0	1.10362	1.76817	2.13999	1.71083	0.380248	0.817864	NA	1.43323	1.873
Ano8	156.607	165.859	172.164	154.715	156.219	201.878	0.0506048	0.819325	0.999927	164.877	170.937
Ano9	3.99508	2.36941	1.10362	4.42044	3.20998	10.265	1.17046	0.380474	NA	2.48937	5.96513
Anp32a	632.821	553.257	620.233	593.222	674.096	538.056	-0.00464891	0.975809	0.999927	602.104	601.792
Anp32b	505.778	421.755	535.255	474.755	525.367	396.913	-0.0687383	0.691121	0.999927	487.596	465.678
Anp32e	508.175	567.474	507.664	518.075	538.207	448.238	-0.0745345	0.632809	0.999927	527.771	501.506
Anpep	834.173	689.499	902.76	754.126	660.186	740.79	-0.163374	0.305875	0.999927	808.811	718.367
Antxr1	170.191	180.075	235.071	173.281	201.159	171.083	-0.0870765	0.68156	0.999927	195.112	181.841
Antxr2	251.69	240.495	282.526	197.151	165.849	205.3	-0.442727	0.0271155	0.999927	258.237	189.433
Anxa1	2444.99	2364.67	3191.66	3458.55	3049.48	2444.78	0.167767	0.172624	0.999927	2667.11	2984.27
Anxa11	674.37	666.989	503.25	485.364	551.047	825.476	-0.00538759	0.972073	0.999927	614.87	620.629
Anxa2	1882.48	1775.87	1458.98	2608.94	1306.46	1492.7	0.0812146	0.695443	0.999927	1705.78	1802.7
Anxa3	197.357	252.342	260.454	450	145.519	153.975	0.0229828	0.942628	0.999927	236.718	249.831
Anxa4	1254.46	1284.22	1296.75	1440.18	1269.01	1246.34	0.0464571	0.705531	0.999927	1278.48	1318.51
Anxa5	1920.84	2173.93	2105.7	2384.38	1905.66	1886.19	-0.000848942	0.99498	0.999927	2066.82	2058.74
Anxa6	3199.26	3409.58	2904.72	3939.49	3128.66	3506.35	0.16088	0.206736	0.999927	3171.19	3524.83
Anxa7	2285.99	2368.23	2260.21	2466.6	2490.95	2441.36	0.0990282	0.344016	0.999927	2304.81	2466.3
Anxa8	7.99017	8.29294	0	8.84087	11.7699	2.56625	1.13967	0.348289	0.999927	5.4277	7.72568
Anxa9	15.9803	16.5859	18.7615	15.9136	24.6099	22.2408	0.293163	0.61341	0.999927	17.1092	20.9214
Aoah	52.7351	31.987	34.2122	38.0157	50.2897	76.132	0.437992	0.295268	0.999927	39.6448	54.8125
Aoc1	3.99508	1.18471	3.31085	4.42044	2.13999	4.27708	0.375093	0.800785	NA	2.83021	3.6125
Aoc2	27.1666	20.14	33.1085	38.8998	39.5898	34.2166	0.501711	0.275137	0.999927	26.805	37.5687
Aoc3	77.5046	214.432	101.533	96.3655	187.249	97.5173	-0.0519763	0.891563	0.999927	131.156	127.044
Aox1	84.6958	93.5917	103.74	106.975	172.269	81.2645	0.315323	0.277167	0.999927	94.0092	120.169
Aox2	41.5489	45.0188	59.5954	48.6248	57.7797	42.7708	0.0412269	0.912746	0.999927	48.721	49.7251
Aox3	372.342	325.794	384.059	197.151	506.107	442.25	0.0670751	0.79609	0.999927	360.732	381.836
Aox4	71.9115	71.0823	120.294	87.5246	92.0195	116.336	0.213095	0.504984	0.999927	87.7627	98.6268
Ap1ar	817.394	912.223	902.76	976.032	900.935	868.246	0.0650082	0.633779	0.999927	877.459	915.071
Ap1b1	1005.16	1152.72	892.827	1114.83	951.224	1171.92	0.09371	0.470686	0.999927	1016.9	1079.33
Ap1g1	2157.34	2245.02	2595.71	2520.53	2531.61	2222.37	0.0596538	0.568091	0.999927	2332.69	2424.84
Ap1g2	274.862	219.171	254.936	282.024	287.828	305.383	0.222289	0.240896	0.999927	249.656	291.745
Ap1m1	183.774	162.305	104.844	164.44	127.329	174.505	0.0661838	0.773589	0.999927	150.307	155.425
Ap1m2	1574.06	1739.15	1630.04	1564.83	1463.75	1679.18	-0.0704278	0.549564	0.999927	1647.75	1569.26
Ap1s1	234.911	244.049	199.755	221.022	178.689	212.143	-0.146627	0.473043	0.999927	226.238	203.951
Ap1s2	85.4948	90.0376	79.4605	82.2201	96.2994	74.4211	-0.0226397	0.938431	0.999927	84.9976	84.3136
Ap1s3	233.313	199.031	292.459	268.762	263.218	252.348	0.127783	0.52352	0.999927	241.601	261.443
Ap2a1	377.136	382.66	245.003	284.676	291.038	399.479	-0.0339938	0.838374	0.999927	334.933	325.064
Ap2a2	1395.88	1483.25	1276.89	1373.87	1373.87	1479.87	0.0286343	0.801407	0.999927	1385.34	1409.2
Ap2b1	2137.37	2182.23	2190.68	2446.27	2309.05	2277.12	0.115396	0.30455	0.999927	2170.09	2344.14
Ap2m1	743.085	783.09	657.756	848.724	756.486	783.56	0.133853	0.337174	0.999927	727.977	796.256
Ap2s1	360.357	385.029	254.936	320.039	226.839	338.744	-0.166258	0.367353	0.999927	333.441	295.208
Ap3b1	1121.82	1097.04	1423.67	1167.88	1460.54	1266.01	0.108173	0.391301	0.999927	1214.17	1298.14
Ap3b2	7.19115	5.92353	4.41447	3.53635	1.06999	0.855415	-1.637	0.222402	NA	5.84305	1.82059
Ap3d1	1981.56	1859.99	1770.2	1967.98	2043.69	2228.36	0.154613	0.170322	0.999927	1870.58	2080.01
Ap3m1	842.164	881.421	918.21	1120.14	843.155	763.886	0.0424287	0.781732	0.999927	880.598	909.06
Ap3m2	90.2889	82.9294	69.5279	69.8429	70.6196	71.8549	-0.192141	0.529944	0.999927	80.9154	70.7724
Ap3s1	425.876	467.959	505.457	581.729	488.987	392.636	0.050782	0.755602	0.999927	466.431	487.784
Ap3s2	373.141	383.845	396.199	441.159	350.958	382.371	0.0310193	0.855736	0.999927	384.395	391.496
Ap4b1	299.631	283.145	336.604	311.199	256.798	276.299	-0.117407	0.520412	0.999927	306.46	281.432
Ap4e1	214.935	199.031	280.319	263.458	337.048	251.492	0.303534	0.100625	0.999927	231.428	283.999
Ap4m1	155.009	146.903	195.34	180.354	187.249	171.083	0.128278	0.5459	0.999927	165.751	179.562
Ap4s1	239.705	236.941	274.801	253.733	294.248	234.384	0.0555147	0.76351	0.999927	250.482	260.788
Ap5b1	125.446	146.903	75.046	83.9883	69.5496	149.698	-0.210365	0.421508	0.999927	115.798	101.079
Ap5m1	386.724	439.526	501.043	469.45	500.757	410.599	0.0592135	0.699108	0.999927	442.431	460.269
Ap5s1	151.813	126.763	144.574	146.758	126.259	169.372	0.0583752	0.808099	0.999927	141.05	147.463
Ap5z1	141.426	98.3306	77.2533	90.1769	105.929	130.879	0.0498796	0.856861	0.999927	105.67	108.995
Apaf1	198.955	176.521	228.449	190.079	180.829	169.372	-0.158198	0.431986	0.999927	201.308	180.093
Apba1	43.9459	58.0506	58.4918	49.5089	56.7097	62.4453	0.0861507	0.810757	0.999927	53.4961	56.2213
Apba2	5.59312	9.47764	6.62171	7.95678	5.34997	5.13249	-0.223752	0.810207	0.999927	7.23082	6.14641
Apba3	186.97	248.788	99.3256	127.309	103.789	205.3	-0.261866	0.255819	0.999927	178.361	145.466
Apbb1	35.1567	35.5412	23.176	38.0157	25.6798	40.2045	0.157894	0.729671	0.999927	31.2913	34.6334
Apbb1ip	51.1371	33.1718	30.9013	49.5089	38.5198	41.0599	0.161267	0.678846	0.999927	38.4034	43.0295
Apbb2	327.597	267.743	353.158	343.91	335.978	318.214	0.0785007	0.656347	0.999927	316.166	332.701
Apbb3	143.024	118.471	183.201	165.324	246.099	203.589	0.481245	0.0375807	0.999927	148.232	205.004
Apc	2538.48	2467.74	3129.86	2722.99	3168.25	2697.98	0.0881341	0.404695	0.999927	2712.03	2863.07
Apc2	29.5636	22.5094	16.5543	19.4499	20.3299	23.9516	-0.0993692	0.849785	0.999927	22.8758	21.2438
Apcdd1	47.142	22.5094	46.352	40.668	38.5198	47.0478	0.124299	0.779191	0.999927	38.6678	42.0785
Apeh	435.464	388.583	360.883	435.855	345.608	437.973	0.0409517	0.808487	0.999927	394.977	406.478
Apex1	47.142	52.127	35.3158	45.0884	33.1698	44.4816	-0.118344	0.768917	0.999927	44.8616	40.9133
Apex2	68.7154	90.0376	69.5279	113.163	72.7596	89.8186	0.277253	0.387583	0.999927	76.0937	91.9138
Aph1a	356.361	375.552	290.252	323.576	373.428	356.708	0.0517659	0.764073	0.999927	340.722	351.237
Aph1b	242.901	276.036	272.594	285.56	344.538	248.07	0.140656	0.462569	0.999927	263.844	292.723
Aph1c	566.503	574.582	726.181	499.509	803.565	632.152	0.0600595	0.732895	0.999927	622.422	645.075
Api5	1224.89	1338.72	1450.15	1370.33	1385.64	1199.29	-0.0227424	0.848774	0.999927	1337.92	1318.42
Apip	138.23	182.445	119.191	128.193	141.239	106.927	-0.222961	0.394879	0.999927	146.622	125.453
Apitd1	15.1813	11.8471	4.41447	20.334	3.20998	11.9758	0.25913	0.75242	0.999927	10.4809	11.8399
Aplf	98.279	114.916	103.74	84.8724	108.069	106.927	-0.0784988	0.770972	0.999927	105.645	99.9562
Apln	3.99508	9.47764	3.31085	2.65226	7.48996	7.69874	0.143132	0.890167	0.999927	5.59453	5.94698
Aplnr	27.1666	39.0953	36.4194	14.1454	35.3098	12.8312	-0.786104	0.131825	0.999927	34.2271	20.7621
Aplp1	23.1715	26.0635	28.6941	51.277	20.3299	52.1803	0.650683	0.211666	0.999927	25.9764	41.2624
Aplp2	6678.98	7484.97	7229.8	6062.18	8675.51	7142.72	0.0343279	0.794077	0.999927	7131.25	7293.47
Apmap	713.522	1015.29	741.631	870.826	1012.21	721.97	0.0797503	0.65227	0.999927	823.482	868.337
Apoa1bp	661.586	741.626	663.275	557.859	593.847	738.223	-0.136135	0.379438	0.999927	688.829	629.976
Apoa2	4.7941	8.29294	5.51809	4.42044	4.27997	3.42166	-0.621228	0.576503	NA	6.20171	4.04069
Apobec1	174.186	127.948	161.128	172.397	179.759	218.986	0.296048	0.204216	0.999927	154.421	190.381
Apobec2	14.3823	23.6941	23.176	14.1454	20.3299	17.1083	-0.244709	0.674557	0.999927	20.4175	17.1945
Apobec3	491.395	362.52	427.1	507.466	505.037	482.454	0.218183	0.181653	0.999927	427.005	498.319
Apobr	188.568	161.12	144.574	148.527	194.739	271.167	0.290588	0.223465	0.999927	164.754	204.811
Apoc1	283.651	516.532	186.511	186.542	345.608	236.95	-0.281803	0.343515	0.999927	328.898	256.367
Apod	1242.47	2024.66	1127.9	1322.59	1437	1541.46	0.00489609	0.977236	0.999927	1465.01	1433.68
Apoe	3043.45	3715.24	1590.31	1871.61	1858.58	3254.86	-0.235457	0.0693675	0.999927	2783	2328.35
Apof	226.122	238.126	177.683	146.758	124.119	160.818	-0.562564	0.0102695	0.82506	213.977	143.899
Apoh	2.39705	1.18471	2.20724	1.76817	1.06999	3.42166	0.0280033	0.987286	NA	1.92966	2.08661
Apol10a	14.3823	8.29294	18.7615	0.884087	3.20998	13.6866	-1.4164	0.087152	0.999927	13.8122	5.9269
Apol10b	16.7793	10.6623	8.82895	7.95678	23.5399	15.3975	0.372109	0.606544	0.999927	12.0902	15.6314
Apol11b	11.1862	5.92353	4.41447	6.18861	14.9799	4.27708	0.183784	0.853496	0.999927	7.17474	8.48187
Apol6	15.9803	29.6176	9.93256	15.0295	46.0097	5.98791	0.098051	0.888676	0.999927	18.5102	22.3424
Apol7a	307.621	387.399	352.054	535.757	470.797	532.924	0.568976	0.00115175	0.316888	349.025	513.159
Apol7c	66.3184	2.36941	5.51809	3.53635	9.62994	14.5421	-0.857369	0.490176	0.999927	24.7353	9.23612
Apol7e	7.19115	3.55412	7.72533	1.76817	8.55995	7.69874	0.100653	0.925895	0.999927	6.15686	6.00895
Apol9a	11.1862	13.0318	1.10362	0.884087	8.55995	14.5421	0.177462	0.851483	0.999927	8.44054	7.99537
Apol9b	18.3774	3.55412	1.10362	2.65226	5.34997	10.265	-0.223423	0.852152	0.999927	7.67837	6.08907
Apold1	12.7843	17.7706	17.6579	19.4499	5.34997	8.55415	-0.519502	0.467825	0.999927	16.0709	11.118
Apom	4.7941	1.18471	3.31085	2.65226	5.34997	4.27708	0.378808	0.762158	NA	3.09655	4.0931
Apoo	75.9066	93.5917	66.2171	71.611	82.3895	57.3128	-0.170751	0.598458	0.999927	78.5718	70.4378
Apool	224.524	223.909	245.003	207.76	264.288	201.023	-0.0484964	0.815787	0.999927	231.145	224.357
Apopt1	230.916	255.896	242.796	215.717	260.008	235.239	-0.039783	0.837559	0.999927	243.203	236.988
App	17007.1	17581	16312.6	15086.9	17348.9	19613	0.0303632	0.776852	0.999927	16966.9	17349.6
Appbp2	545.728	598.276	615.819	590.57	627.016	536.345	-0.00554742	0.96864	0.999927	586.608	584.644
Appbp2os	24.7695	10.6623	17.6579	22.9863	31.0298	16.2529	0.357008	0.541444	0.999927	17.6966	23.423
Appl1	572.096	550.888	722.87	678.095	712.616	591.092	0.109082	0.420562	0.999927	615.285	660.601
Appl2	1910.45	1472.59	2692.83	1991.85	2154.97	1978.58	0.0525402	0.70611	0.999927	2025.29	2041.8
Aprt	111.063	108.993	60.699	101.67	73.8296	117.192	0.0840496	0.758983	0.999927	93.5851	97.5638
Aptx	382.729	399.246	465.727	361.592	493.267	462.78	0.0849273	0.619231	0.999927	415.901	439.213
Aqp1	157.406	311.578	89.3931	114.047	133.749	148.842	-0.393446	0.178276	0.999927	186.126	132.213
Aqp11	4.7941	1.18471	1.10362	5.30452	3.20998	3.42166	0.808581	0.538535	NA	2.36081	3.97872
Aqp2	7.99017	1.18471	9.93256	4.42044	13.9099	9.40957	0.560427	0.557286	0.999927	6.36915	9.24664
Aqp3	1.59803	0	0	0	1.06999	0	-0.612166	0.814582	NA	0.532678	0.356665
Aqp4	23.1715	9.47764	25.3832	9.72496	22.4699	17.1083	-0.215901	0.736761	0.999927	19.3441	16.4344
Aqp5	4950.71	5048.03	2952.18	4661.79	2833.34	4793.75	-0.0461169	0.766811	0.999927	4316.97	4096.29
Aqp7	3.99508	101.885	12.1398	8.84087	68.4796	3.42166	-0.711302	0.641551	0.999927	39.3399	26.914
Aqp9	2.39705	1.18471	4.41447	0.884087	1.06999	0	-2.14314	0.277249	NA	2.66541	0.65136
Aqr	751.076	713.193	835.439	907.073	883.815	802.38	0.177275	0.182021	0.999927	766.569	864.423
Ar	1558.08	1624.23	1807.73	1693.03	2142.13	1828.88	0.18672	0.12418	0.999927	1663.35	1888.01
Araf	852.551	825.74	845.372	814.244	754.346	906.74	-0.0291147	0.825196	0.999927	841.221	825.11
Arap1	980.393	855.357	801.227	816.896	738.296	1021.37	-0.0429347	0.755481	0.999927	878.993	858.853
Arap2	639.213	640.926	768.118	849.608	757.556	624.453	0.117865	0.397718	0.999927	682.752	743.872
Arap3	76.7056	73.4517	75.046	56.5816	69.5496	82.1199	-0.119569	0.707914	0.999927	75.0678	69.417
Arc	538.537	736.887	634.58	457.957	419.438	627.019	-0.35132	0.0487221	0.999927	636.668	501.471
Arcn1	5792.07	5780.18	6585.29	6565.23	6193.12	5329.24	-0.00342759	0.973755	0.999927	6052.51	6029.2
Arel1	753.473	771.243	736.113	753.242	795.005	756.187	0.0286679	0.824218	0.999927	753.61	768.145
Arf1	4679.84	5097.79	4226.86	5030.46	4138.74	4605.56	-0.0196326	0.869159	0.999927	4668.16	4591.58
Arf2	234.112	235.756	207.48	247.544	207.579	236.095	0.0282364	0.882714	0.999927	225.783	230.406
Arf3	1217.7	1169.3	1221.71	1259.82	1230.49	1252.33	0.0563189	0.642758	0.999927	1202.9	1247.55
Arf4	3053.04	3183.3	3027.22	3981.93	2896.47	2492.68	0.00408181	0.978161	0.999927	3087.86	3123.69
Arf5	596.066	623.155	495.525	533.104	323.138	514.96	-0.328312	0.0676796	0.999927	571.582	457.068
Arf6	3395.82	3526.87	3496.26	3758.25	3610.16	3492.66	0.0641721	0.545983	0.999927	3472.98	3620.36
Arfgap1	836.57	644.48	694.176	966.307	712.616	750.199	0.16156	0.354065	0.999927	725.075	809.707
Arfgap2	544.929	521.27	510.975	651.572	543.557	590.237	0.178694	0.223322	0.999927	525.725	595.122
Arfgap3	2850.09	2701.13	2697.24	2594.8	2575.47	2816.88	-0.0458543	0.663905	0.999927	2749.49	2662.38
Arfgef1	3183.28	3240.17	4041.45	3705.21	3868.03	3206.95	0.0489291	0.623734	0.999927	3488.3	3593.4
Arfgef2	3765.77	3738.93	4431.03	3840.47	4386.97	4585.88	0.109641	0.31216	0.999927	3978.57	4271.11
Arfgef3	1833.74	1878.94	2035.07	2456.88	1808.29	1986.27	0.13374	0.354068	0.999927	1915.92	2083.81
Arfip1	651.998	671.728	789.087	780.649	770.395	593.658	0.0199487	0.884283	0.999927	704.271	714.901
Arfip2	1302.4	1416.91	1164.32	1708.06	1010.07	1262.59	0.0441366	0.802022	0.999927	1294.54	1326.91
Arfrp1	274.063	265.374	286.941	344.794	283.548	295.974	0.162774	0.360307	0.999927	275.459	308.105
Arg1	769.453	640.926	1079.34	480.059	448.327	334.467	-0.962317	2.26909e-11	8.29464e-08	829.906	420.951
Arg2	23.1715	24.8788	34.2122	44.2044	18.1899	20.53	0.0147063	0.978096	0.999927	27.4208	27.6414
Arglu1	810.203	701.346	1040.71	1161.69	1227.28	893.054	0.370419	0.00425659	0.5841	850.754	1094.01
Arhgap1	659.988	676.467	653.342	732.908	629.156	671.501	0.0360924	0.801945	0.999927	663.266	677.855
Arhgap10	166.994	165.859	162.232	141.454	95.2294	109.493	-0.510578	0.0430951	0.999927	165.028	115.392
Arhgap11a	89.4899	48.5729	65.1135	66.3065	66.3396	75.2765	0.0274065	0.935676	0.999927	67.7254	69.3076
Arhgap12	1623.6	1806.68	2068.18	1870.73	2024.43	1619.3	0.00595913	0.958435	0.999927	1832.82	1838.15
Arhgap15	165.396	67.5282	59.5954	45.9725	67.4096	77.8428	-0.531021	0.128233	0.999927	97.5067	63.7416
Arhgap15os	1.59803	0	1.10362	0	1.06999	1.71083	0.0612041	0.974293	NA	0.90055	0.926941
Arhgap17	251.69	152.827	258.247	202.456	234.329	240.372	0.0451279	0.851375	0.999927	220.921	225.719
Arhgap18	1013.95	1149.16	1336.48	1010.51	1280.78	1128.29	-0.0239033	0.860159	0.999927	1166.53	1139.86
Arhgap19	156.607	181.26	151.196	183.006	195.809	169.372	0.164337	0.463839	0.999927	163.021	182.729
Arhgap20	24.7695	43.8341	51.8701	44.2044	27.8198	32.5058	-0.142394	0.761397	0.999927	40.1579	34.8433
Arhgap21	2129.38	2305.44	2144.33	1515.33	2642.88	2735.62	0.059469	0.745833	0.999927	2193.05	2297.94
Arhgap22	46.343	10.6623	19.8651	13.2613	18.1899	35.9274	-0.301839	0.631327	0.999927	25.6235	22.4595
Arhgap23	118.254	77.0059	96.0148	85.7564	65.2696	94.9511	-0.255298	0.404582	0.999927	97.0917	81.9924
Arhgap24	197.357	200.215	194.237	225.442	167.989	153.119	-0.120601	0.595236	0.999927	197.27	182.184
Arhgap25	150.215	45.0188	52.9737	43.3203	44.9397	69.2886	-0.594498	0.12897	0.999927	82.7359	52.5162
Arhgap26	970.006	938.287	1220.6	766.503	1157.73	1128.29	-0.0249998	0.882374	0.999927	1042.96	1017.51
Arhgap27	153.411	114.916	88.2895	144.106	105.929	153.975	0.185736	0.462201	0.999927	118.872	134.67
Arhgap27os3	12.7843	4.73882	11.0362	7.95678	5.34997	10.265	-0.272267	0.751898	0.999927	9.51976	7.85724
Arhgap28	37.5538	26.0635	30.9013	42.4362	18.1899	24.807	-0.164978	0.742042	0.999927	31.5062	28.4777
Arhgap29	2006.33	2005.71	2584.67	3089	2378.6	1988.84	0.175647	0.198119	0.999927	2198.9	2485.48
Arhgap30	337.984	138.611	112.569	143.222	127.329	221.553	-0.213425	0.447769	0.999927	196.388	164.035
Arhgap31	250.891	206.139	184.304	185.658	188.319	199.312	-0.162839	0.418679	0.999927	213.778	191.096
Arhgap32	1231.28	1283.04	1555	1501.18	1424.16	1370.38	0.093163	0.445836	0.999927	1356.44	1431.91
Arhgap33	3.19607	3.55412	5.51809	6.18861	3.20998	6.84332	0.475631	0.682043	NA	4.08942	5.41397
Arhgap35	1312.78	1304.36	1458.98	1397.74	1510.83	1439.66	0.098274	0.390829	0.999927	1358.71	1449.41
Arhgap39	115.058	119.655	78.3569	89.2928	90.9495	132.589	-0.000735596	0.997766	0.999927	104.357	104.277
Arhgap4	189.367	37.9106	62.9062	57.4657	56.7097	105.216	-0.360513	0.384326	0.999927	96.7279	73.1305
Arhgap42	455.439	505.869	685.347	602.063	575.657	562.008	0.105416	0.488818	0.999927	548.885	579.909
Arhgap44	414.69	414.647	347.64	367.78	338.118	439.683	-0.0380685	0.818171	0.999927	392.325	381.861
Arhgap5	4362.63	4849	5885.6	5297.45	5263.3	4289.91	-0.0207289	0.842761	0.999927	5032.41	4950.22
Arhgap6	81.4997	67.5282	82.7714	87.5246	67.4096	75.2765	-0.00889749	0.976971	0.999927	77.2664	76.7369
Arhgap8	185.372	162.305	172.164	151.179	124.119	163.384	-0.24692	0.289799	0.999927	173.28	146.227
Arhgap9	389.121	313.947	370.816	365.128	408.738	402.045	0.128917	0.445765	0.999927	357.961	391.97
Arhgdia	1362.32	1477.33	982.22	1279.27	1076.41	1463.62	0.0114859	0.926116	0.999927	1273.96	1273.1
Arhgdib	396.312	131.502	129.123	99.9018	97.3694	140.288	-0.875054	0.00404706	0.580158	218.979	112.52
Arhgdig	155.009	176.521	119.191	190.079	119.839	162.529	0.0875783	0.73338	0.999927	150.24	157.482
Arhgef1	404.302	260.635	203.066	205.992	190.459	325.058	-0.274491	0.1976	0.999927	289.334	240.503
Arhgef10	1578.86	1546.04	1715.02	1320.83	1416.67	1660.36	-0.137217	0.251288	0.999927	1613.31	1465.95
Arhgef10l	773.448	1002.26	598.161	896.464	571.377	1017.94	0.0754269	0.656348	0.999927	791.29	828.595
Arhgef11	640.811	633.817	656.653	640.079	711.546	725.392	0.107268	0.427559	0.999927	643.761	692.339
Arhgef12	3071.42	3205.81	3542.61	3202.16	3931.16	3455.02	0.113602	0.29596	0.999927	3273.28	3529.45
Arhgef15	35.1567	35.5412	34.2122	29.1749	35.3098	31.6504	-0.127205	0.765952	0.999927	34.97	32.045
Arhgef16	333.989	356.596	259.35	274.951	266.428	410.599	-0.00733775	0.965943	0.999927	316.645	317.326
Arhgef17	285.249	302.1	245.003	175.049	256.798	306.239	-0.184901	0.359499	0.999927	277.451	246.029
Arhgef18	1297.6	1153.9	1258.12	1026.43	1309.67	1441.37	0.0212368	0.881547	0.999927	1236.54	1259.16
Arhgef19	214.935	221.54	135.745	247.544	153.009	267.745	0.241583	0.296538	0.999927	190.74	222.766
Arhgef2	536.14	434.787	604.783	540.177	538.207	633.863	0.126719	0.442092	0.999927	525.237	570.749
Arhgef25	205.347	168.228	193.133	217.485	237.539	260.046	0.33113	0.107865	0.999927	188.903	238.357
Arhgef26	51.9361	69.8976	99.3256	58.3497	63.1296	66.7224	-0.183166	0.586807	0.999927	73.7198	62.7339
Arhgef28	2019.12	2136.02	2847.33	2250.89	2248.06	2297.65	-0.0171562	0.880142	0.999927	2334.16	2265.53
Arhgef3	682.36	574.582	598.161	602.947	514.667	555.165	-0.154919	0.279013	0.999927	618.368	557.593
Arhgef33	4.7941	5.92353	9.93256	5.30452	8.55995	5.13249	-0.0772245	0.93694	0.999927	6.8834	6.33232
Arhgef37	127.044	170.598	144.574	145.874	127.329	165.951	0.000412735	0.998621	0.999927	147.405	146.385
Arhgef38	156.607	133.872	259.35	191.847	216.139	188.191	0.172856	0.432586	0.999927	183.276	198.726
Arhgef39	8.78918	7.10823	7.72533	10.609	2.13999	5.13249	-0.412367	0.645028	0.999927	7.87425	5.96051
Arhgef4	27.9656	16.5859	19.8651	16.7977	14.9799	23.9516	-0.238531	0.679271	0.999927	21.4722	18.5764
Arhgef40	313.215	377.921	253.832	352.751	318.858	389.214	0.182399	0.290308	0.999927	314.989	353.608
Arhgef5	1423.85	1290.14	1549.48	1597.55	1775.12	1562.84	0.216006	0.0734357	0.999927	1421.16	1645.17
Arhgef6	471.42	394.507	440.344	282.908	564.957	508.972	0.0584606	0.801079	0.999927	435.423	452.279
Arhgef7	464.229	451.373	466.831	433.203	437.627	519.237	0.00595247	0.968967	0.999927	460.811	463.356
Arhgef9	42.3479	52.127	35.3158	22.9863	39.5898	32.5058	-0.441631	0.316341	0.999927	43.2636	31.6939
Arid1a	903.688	733.333	890.62	841.651	799.285	926.415	0.0228561	0.885181	0.999927	842.547	855.784
Arid1b	1132.21	1061.5	1017.54	945.089	968.344	1154.81	-0.0692144	0.583845	0.999927	1070.41	1022.75
Arid2	1051.51	1055.57	1241.57	1065.32	1245.47	1162.51	0.0590645	0.651789	0.999927	1116.22	1157.77
Arid3a	103.073	78.1906	87.1858	78.6837	90.9495	98.3728	-0.00894319	0.97675	0.999927	89.4832	89.3353
Arid3b	56.7302	34.3565	44.1447	53.0452	40.6598	58.1682	0.155902	0.690214	0.999927	45.0771	50.6244
Arid4a	707.13	561.55	711.834	610.02	740.436	652.682	0.0163492	0.914383	0.999927	660.171	667.713
Arid4b	1017.15	971.459	1264.75	1097.15	1244.4	1005.97	0.0479415	0.68949	0.999927	1084.45	1115.84
Arid5a	167.793	142.165	135.745	156.483	124.119	151.409	-0.0460014	0.843364	0.999927	148.568	144.004
Arid5b	208.543	175.336	222.931	258.153	181.899	212.998	0.107132	0.627355	0.999927	202.27	217.684
Arih1	1498.16	1503.39	1740.41	1539.2	1758	1491.84	0.0166623	0.883444	0.999927	1580.65	1596.35
Arih2	703.934	728.594	802.33	778.881	926.615	779.283	0.155479	0.243973	0.999927	744.953	828.26
Arl1	1475.78	1634.89	1493.2	1657.66	1294.69	1135.99	-0.184997	0.201088	0.999927	1534.62	1362.78
Arl10	118.254	106.623	73.9424	78.6837	70.6196	127.457	-0.129671	0.639296	0.999927	99.6068	92.2534
Arl11	11.9852	7.10823	9.93256	10.609	8.55995	11.9758	0.0941385	0.907714	0.999927	9.67535	10.3816
Arl13a	3.19607	2.36941	7.72533	5.30452	11.7699	6.84332	0.983601	0.321889	0.999927	4.43027	7.97259
Arl13b	179.779	189.553	212.998	170.629	166.919	152.264	-0.243929	0.243534	0.999927	194.11	163.271
Arl14ep	441.057	393.322	504.354	550.786	435.487	375.527	0.0260274	0.878227	0.999927	446.244	453.934
Arl15	473.018	477.436	563.949	516.307	623.806	524.37	0.139402	0.359981	0.999927	504.801	554.828
Arl16	91.0879	59.2353	64.0099	106.975	78.1095	66.7224	0.217194	0.507449	0.999927	71.4443	83.9355
Arl2	94.284	144.534	100.429	98.1337	99.5094	126.601	-0.0544943	0.840605	0.999927	113.082	108.082
Arl2bp	858.144	868.389	789.087	1045.87	929.825	855.415	0.168819	0.220045	0.999927	838.54	943.705
Arl3	147.019	157.566	113.673	131.729	127.329	138.577	-0.0649858	0.785672	0.999927	139.419	132.545
Arl4a	332.391	469.143	333.293	480.943	503.967	308.805	0.15849	0.448978	0.999927	378.276	431.238
Arl4c	242.901	165.859	168.854	145.874	150.869	148.842	-0.375988	0.0967288	0.999927	192.538	148.529
Arl4d	214.136	227.463	199.755	106.09	175.479	212.143	-0.397612	0.0905097	0.999927	213.785	164.571
Arl5a	1217.7	1351.75	1321.03	1332.32	1303.25	1099.21	-0.0683463	0.583114	0.999927	1296.83	1244.93
Arl5b	390.719	517.716	536.358	409.332	480.427	386.648	-0.174707	0.297301	0.999927	481.598	425.469
Arl5c	39.9508	3.55412	7.72533	1.76817	5.34997	15.3975	-1.14091	0.157731	0.999927	17.0768	7.50521
Arl6	64.7203	60.42	76.1497	78.6837	60.9896	47.0478	-0.126206	0.702508	0.999927	67.0967	62.2404
Arl6ip1	803.811	828.109	732.802	635.659	796.075	715.127	-0.141193	0.333702	0.999927	788.241	715.62
Arl6ip4	272.465	291.438	230.656	284.676	217.209	307.949	0.0245407	0.895913	0.999927	264.853	269.945
Arl6ip5	1098.65	1131.39	1045.13	1270.43	1087.11	1143.69	0.0921815	0.479211	0.999927	1091.72	1167.08
Arl6ip6	149.416	149.273	176.579	152.947	148.729	127.457	-0.146878	0.505382	0.999927	158.423	143.044
Arl8a	206.146	208.508	206.377	226.326	264.288	247.215	0.250286	0.199547	0.999927	207.01	245.943
Arl8b	1741.06	2055.46	2061.56	2050.2	2218.1	1711.69	0.0232874	0.849619	0.999927	1952.69	1993.33
Arl9	2.39705	1.18471	2.20724	0	1.06999	0	-2.53754	0.314925	NA	1.92966	0.356665
Armc1	537.738	650.403	578.296	642.731	623.806	501.273	-0.0105426	0.946144	0.999927	588.812	589.27
Armc10	298.033	291.438	346.536	312.083	315.648	284.853	-0.0351092	0.83531	0.999927	312.002	304.195
Armc2	13.5833	11.8471	24.2796	7.95678	5.34997	10.265	-0.992244	0.185713	0.999927	16.57	7.85724
Armc5	112.661	91.2223	62.9062	89.2928	55.6397	115.481	-0.0434157	0.88836	0.999927	88.93	86.8045
Armc6	40.7498	50.9423	29.7977	56.5816	16.0499	38.4937	-0.116749	0.811243	0.999927	40.4966	37.0417
Armc7	57.5292	53.3117	51.8701	45.0884	43.8697	62.4453	-0.117401	0.74593	0.999927	54.237	50.4678
Armc8	579.287	573.397	685.347	699.313	697.636	589.381	0.113038	0.41542	0.999927	612.677	662.11
Armc9	49.539	53.3117	57.3881	69.8429	52.4297	59.0237	0.184387	0.589844	0.999927	53.413	60.4321
Armcx1	63.1223	50.9423	89.3931	49.5089	43.8697	53.0357	-0.437559	0.220227	0.999927	67.8192	48.8048
Armcx2	87.8918	88.8529	94.9112	77.7997	65.2696	65.867	-0.384325	0.184358	0.999927	90.552	69.6454
Armcx3	395.513	342.38	396.199	374.853	348.818	332.757	-0.101492	0.559904	0.999927	378.031	352.142
Armcx4	64.7203	29.6176	38.6266	23.8703	24.6099	22.2408	-0.913865	0.0417659	0.999927	44.3215	23.5737
Armcx5	74.3085	65.1588	107.051	73.3792	82.3895	67.5778	-0.115658	0.702228	0.999927	82.1728	74.4488
Armcx6	23.9705	21.3247	18.7615	17.6817	8.55995	17.9637	-0.54667	0.371149	0.999927	21.3522	14.7351
Armt1	135.034	112.547	115.88	123.772	162.639	113.77	0.125659	0.625029	0.999927	121.154	133.394
Arnt	601.66	625.525	665.482	590.57	673.026	625.309	-0.000222837	0.998706	0.999927	630.889	629.635
Arnt2	5.59312	5.92353	4.41447	3.53635	6.41996	5.13249	-0.0765495	0.938481	0.999927	5.31037	5.0296
Arntl	57.5292	48.5729	71.7352	93.7132	36.3798	30.7949	-0.190063	0.65753	0.999927	59.2791	53.6293
Arntl2	25.5685	26.0635	34.2122	26.5226	32.0998	16.2529	-0.224255	0.65157	0.999927	28.6147	24.9584
Arpc1a	1292.01	1651.48	1148.87	1386.25	1091.39	1373.8	-0.0885306	0.530742	0.999927	1364.12	1283.81
Arpc1b	1848.13	2000.97	1197.43	1759.33	1244.4	2047.86	0.0109251	0.93438	0.999927	1682.17	1683.87
Arpc2	1291.21	1187.07	1268.06	1445.48	1201.6	1147.11	0.0152759	0.905787	0.999927	1248.78	1264.73
Arpc3	1247.26	1224.99	962.355	1250.98	958.714	1135.14	-0.0353374	0.791886	0.999927	1144.87	1114.94
Arpc4	505.778	526.009	432.618	571.12	454.747	448.238	0.00749914	0.962707	0.999927	488.135	491.368
Arpc5	1385.49	1444.16	1466.71	1487.92	1425.23	1262.59	-0.051718	0.659155	0.999927	1432.12	1391.91
Arpc5l	517.763	582.875	598.161	599.411	538.207	469.623	-0.0877408	0.553355	0.999927	566.266	535.747
Arpin	351.567	343.565	327.775	525.148	292.108	295.118	0.117724	0.609211	0.999927	340.969	370.791
Arpp19	648.003	728.594	675.414	769.156	681.586	652.682	0.0300784	0.831292	0.999927	684.004	701.141
Arpp21	7.99017	4.73882	2.20724	13.2613	10.6999	17.9637	1.55613	0.0760586	0.999927	4.97874	13.975
Arr3	1.59803	2.36941	2.20724	1.76817	1.06999	1.71083	-0.398109	0.81039	NA	2.05823	1.51633
Arrb1	1893.67	1778.24	2018.52	2082.02	2064.02	2146.24	0.148937	0.18749	0.999927	1896.81	2097.43
Arrb2	225.323	168.228	136.849	164.44	174.409	201.878	0.0335444	0.878536	0.999927	176.8	180.242
Arrdc1	386.724	290.253	294.666	383.694	354.168	424.286	0.253707	0.156686	0.999927	323.881	387.383
Arrdc2	124.647	88.8529	82.7714	88.4087	120.909	161.673	0.303427	0.299004	0.999927	98.757	123.664
Arrdc3	2181.32	2125.36	3236.91	2191.65	2683.54	2543.15	0.00761928	0.95779	0.999927	2514.53	2472.78
Arrdc4	329.994	438.341	518.701	509.234	395.898	463.635	0.106508	0.583286	0.999927	429.012	456.256
Arrdc5	22.3725	21.3247	39.7303	34.4794	16.0499	24.807	-0.0668545	0.901562	0.999927	27.8091	25.1121
Arsa	123.848	120.84	78.3569	87.5246	102.719	118.903	-0.0481189	0.862103	0.999927	107.681	103.049
Arsb	224.524	206.139	254.936	170.629	165.849	171.083	-0.430863	0.0357444	0.999927	228.533	169.187
Arsg	84.6958	73.4517	92.7039	53.0452	98.4394	88.1078	-0.0693045	0.831165	0.999927	83.6171	79.8641
Arsi	6.39213	1.18471	3.31085	6.18861	3.20998	3.42166	0.214344	0.860518	NA	3.62923	4.27342
Arsj	9.5882	15.4012	6.62171	6.18861	5.34997	5.98791	-0.804008	0.366606	0.999927	10.537	5.84216
Arsk	206.146	193.107	241.692	158.252	271.778	195.89	-0.0342948	0.882038	0.999927	213.649	208.64
Art2a-ps	3.99508	0	0	0.884087	2.13999	7.69874	1.65139	0.249155	0.999927	1.33169	3.57427
Art2b	4.7941	0	0	0.884087	0	0	-1.48808	0.69353	NA	1.59803	0.294696
Art3	104.671	132.687	72.8388	84.8724	158.359	101.794	0.178391	0.580422	0.999927	103.399	115.009
Art4	61.5243	35.5412	43.0411	47.7407	52.4297	30.7949	-0.131221	0.747807	0.999927	46.7022	43.6551
Art5	1.59803	1.18471	1.10362	0	0	0.855415	-2.00639	0.414676	NA	1.29545	0.285138
Artn	1.59803	1.18471	2.20724	0	1.06999	0.855415	-1.33865	0.542768	NA	1.66333	0.641803
Arv1	28.7646	22.5094	27.5905	36.2476	42.7997	37.6383	0.560467	0.223461	0.999927	26.2882	38.8952
Arvcf	110.264	97.1459	89.3931	79.5678	77.0395	120.614	-0.12226	0.685239	0.999927	98.9344	92.407
Arxes1	5.59312	11.8471	2.20724	3.53635	10.6999	1.71083	-0.269723	0.810592	0.999927	6.54914	5.31571
Arxes2	23.9705	66.3435	29.7977	34.4794	86.6695	14.5421	-0.0291939	0.959554	0.999927	40.0372	45.2303
As3mt	242.102	232.202	291.355	289.096	284.618	271.167	0.150467	0.404384	0.999927	255.22	281.627
Asah1	1099.45	1060.31	1218.39	1166.99	1096.74	1015.38	-0.0444098	0.70722	0.999927	1126.05	1093.04
Asah2	1191.33	1117.18	1612.39	1127.21	1199.46	1098.35	-0.172347	0.157992	0.999927	1306.97	1141.68
Asap1	166.195	110.178	156.714	159.136	159.429	138.577	0.072542	0.755669	0.999927	144.362	152.381
Asap2	75.1076	62.7894	75.046	76.9156	79.1795	65.0116	0.0478515	0.876411	0.999927	70.981	73.7022
Asap3	272.465	265.374	304.599	336.837	241.819	326.769	0.111013	0.574763	0.999927	280.812	301.808
Asb1	365.151	369.628	321.153	339.489	400.178	395.202	0.104515	0.562137	0.999927	351.977	378.29
Asb10	4.7941	2.36941	1.10362	0.884087	2.13999	0	-1.62724	0.346657	NA	2.75571	1.00802
Asb13	186.97	219.171	198.651	239.588	215.069	212.998	0.142743	0.488463	0.999927	201.597	222.552
Asb14	4.7941	2.36941	6.62171	6.18861	5.34997	9.40957	0.629334	0.531998	0.999927	4.59507	6.98272
Asb15	2.39705	0	0	1.76817	2.13999	1.71083	1.48348	0.523853	NA	0.799017	1.873
Asb16	8.78918	7.10823	1.10362	3.53635	4.27997	7.69874	0.0853266	0.938613	0.999927	5.66701	5.17169
Asb2	73.5095	82.9294	55.1809	61.002	60.9896	100.939	0.0611527	0.846711	0.999927	70.5399	74.3102
Asb3	174.985	159.935	241.692	186.542	210.789	177.926	0.0173079	0.933576	0.999927	192.204	191.752
Asb4	1.59803	2.36941	1.10362	2.65226	0	0	-1.40396	0.544275	NA	1.69035	0.884087
Asb5	3.99508	8.29294	6.62171	3.53635	9.62994	9.40957	0.261024	0.791387	0.999927	6.30324	7.52529
Asb6	156.607	155.196	73.9424	131.729	97.3694	181.348	0.121366	0.624085	0.999927	128.582	136.815
Asb7	360.357	335.272	412.753	349.214	360.588	328.479	-0.0880226	0.597344	0.999927	369.46	346.094
Asb8	401.106	392.138	346.536	436.739	462.237	425.997	0.217998	0.170986	0.999927	379.927	441.658
Ascc1	213.337	225.094	179.89	177.701	178.689	209.577	-0.12553	0.530173	0.999927	206.107	188.656
Ascc2	246.896	232.202	222.931	266.994	250.379	275.444	0.17513	0.343561	0.999927	234.01	264.272
Ascc3	1848.92	1870.65	2202.82	2628.39	2181.72	1812.62	0.161222	0.218695	0.999927	1974.13	2207.58
Ascl2	3.19607	1.18471	3.31085	0	1.06999	0.855415	-2.17547	0.292182	NA	2.56388	0.641803
Ascl3	224.524	357.781	228.449	286.444	170.129	314.793	-0.0771089	0.748394	0.999927	270.251	257.122
Ascl4	3.99508	4.73882	7.72533	7.0727	0	3.42166	-0.496029	0.69238	NA	5.48641	3.49812
Asf1a	230.916	212.062	278.112	250.197	248.239	237.805	0.0366818	0.845213	0.999927	240.363	245.414
Asf1b	28.7646	13.0318	2.20724	15.0295	5.34997	26.5179	0.357736	0.614223	0.999927	14.6679	15.6324
Asgr1	162.2	177.706	144.574	113.163	187.249	188.191	0.0113934	0.96696	0.999927	161.493	162.868
Asgr2	9.5882	4.73882	5.51809	7.0727	1.06999	8.55415	-0.340027	0.751316	0.999927	6.61504	5.56561
Ash1l	2280.39	2022.29	2817.54	2227.9	2682.47	2309.62	0.0327696	0.786947	0.999927	2373.41	2406.66
Ash2l	530.547	453.742	627.959	612.672	618.456	519.237	0.124565	0.39094	0.999927	537.416	583.455
Asic1	84.6958	77.0059	77.2533	106.09	85.5995	106.927	0.320797	0.273006	0.999927	79.6516	99.5389
Asic2	2.39705	0	2.20724	0.884087	0	1.71083	-0.750236	0.732017	NA	1.53476	0.864973
Asic3	12.7843	9.47764	8.82895	7.0727	12.8399	11.9758	0.0193385	0.979295	0.999927	10.3636	10.6295
Asic5	2.39705	0	2.20724	0	0	0	-3.00002	0.30368	NA	1.53476	0
Asl	365.151	350.673	275.905	300.59	287.828	414.876	0.00848536	0.959982	0.999927	330.576	334.431
Asna1	457.038	565.105	343.225	465.914	367.008	480.743	-0.0385175	0.819246	0.999927	455.122	437.888
Asns	5457.28	3858.59	4791.91	7909.93	5829.33	4182.98	0.330194	0.0898795	0.999927	4702.59	5974.08
Asnsd1	693.546	617.232	792.398	738.213	728.666	628.73	-0.0061656	0.962421	0.999927	701.059	698.536
Aspa	55.1321	122.025	62.9062	54.8134	105.929	40.2045	-0.302288	0.483833	0.999927	80.021	66.9824
Aspg	3.19607	23.6941	1.10362	7.0727	17.1199	6.84332	0.668909	0.494974	0.999927	9.33127	10.3453
Asph	2692.69	2344.53	2745.8	3179.18	1743.02	1582.52	-0.266707	0.191773	0.999927	2594.34	2168.24
Asphd1	1.59803	0	2.20724	0	0	0.855415	-1.92028	0.446811	NA	1.26842	0.285138
Aspm	36.7548	8.29294	29.7977	19.4499	19.2599	25.6625	-0.198681	0.725117	0.999927	24.9485	21.4574
Aspn	74.3085	116.101	131.331	56.5816	74.8996	65.0116	-0.694308	0.0298937	0.999927	107.247	65.4976
Asprv1	8.78918	2.36941	4.41447	0.884087	2.13999	6.84332	-0.844543	0.467404	0.999927	5.19102	3.28913
Aspscr1	264.475	264.189	183.201	235.167	206.509	267.745	0.00619661	0.974458	0.999927	237.288	236.474
Asrgl1	651.998	725.04	604.783	446.464	606.686	674.067	-0.201881	0.19631	0.999927	660.607	575.739
Aste1	111.862	118.471	144.574	152.947	167.989	120.614	0.233679	0.318279	0.999927	124.969	147.183
Astn1	12.7843	3.55412	4.41447	4.42044	1.06999	3.42166	-1.18621	0.30997	0.999927	6.91762	2.9707
Astn2	49.539	50.9423	47.4556	21.2181	51.3597	41.9153	-0.386926	0.372689	0.999927	49.3123	38.1644
Asun	413.891	419.386	534.151	625.05	515.737	456.792	0.2329	0.13958	0.999927	455.809	532.526
Asxl1	569.699	521.27	612.508	572.888	628.086	570.562	0.0581437	0.678628	0.999927	567.826	590.512
Asxl2	895.698	864.835	1121.28	854.912	1204.81	982.872	0.0873862	0.554199	0.999927	960.603	1014.2
Asxl3	3.99508	1.18471	2.20724	0	0	0	-3.81469	0.0755511	NA	2.46234	0
Atad1	1171.36	1290.14	1440.22	1542.73	1305.39	1128.29	0.0240393	0.852266	0.999927	1300.57	1325.47
Atad2	353.165	335.272	397.303	333.301	466.517	390.925	0.135145	0.454268	0.999927	361.913	396.914
Atad2b	604.856	584.06	725.077	658.645	709.406	591.947	0.0383765	0.774267	0.999927	637.998	653.333
Atad3a	458.636	470.328	342.122	528.684	447.257	465.346	0.196992	0.261667	0.999927	423.695	480.429
Atad3aos	7.19115	9.47764	7.72533	12.3772	8.55995	11.9758	0.432502	0.568324	0.999927	8.13137	10.971
Atad5	75.1076	69.8976	81.6677	88.4087	57.7797	72.7103	-0.0480829	0.877113	0.999927	75.5576	72.9662
Atat1	71.9115	84.1141	79.4605	86.6405	87.7395	82.9753	0.131617	0.652329	0.999927	78.4954	85.7851
Atcay	9.5882	4.73882	2.20724	5.30452	3.20998	2.56625	-0.486909	0.661375	0.999927	5.51142	3.69358
Atcayos	2.39705	1.18471	2.20724	3.53635	1.06999	5.13249	0.664594	0.66335	NA	1.92966	3.24628
Ate1	843.762	875.497	1028.57	976.032	1056.08	859.692	0.0765947	0.53928	0.999927	915.944	963.936
Atf1	272.465	278.406	305.702	312.967	284.618	296.829	0.0615291	0.728138	0.999927	285.524	298.138
Atf2	914.874	1024.77	1095.89	876.13	1125.63	900.752	-0.064867	0.64565	0.999927	1011.85	967.505
Atf3	97.48	91.2223	103.74	137.033	136.959	139.433	0.504046	0.0472351	0.999927	97.4808	137.808
Atf4	2508.91	2917.93	2603.44	2982.03	2408.56	2362.66	-0.0484241	0.712226	0.999927	2676.76	2584.41
Atf5	215.734	98.3306	115.88	205.108	135.889	121.469	0.107361	0.740512	0.999927	143.315	154.155
Atf6	3124.95	3483.03	3468.67	2973.18	3831.65	3455.02	0.0284772	0.809913	0.999927	3358.89	3419.95
Atf6b	365.151	388.583	183.201	292.633	207.579	363.551	-0.0740532	0.695229	0.999927	312.312	287.921
Atf7	396.312	377.921	536.358	444.696	479.357	435.406	0.0728255	0.678578	0.999927	436.864	453.153
Atf7ip	653.596	592.353	833.232	564.932	618.456	628.73	-0.180493	0.277537	0.999927	693.06	604.039
Atg10	202.151	200.215	314.531	151.179	238.609	242.938	-0.143953	0.562754	0.999927	238.966	210.908
Atg101	312.416	324.609	207.48	196.267	184.039	347.299	-0.242147	0.218414	0.999927	281.502	242.535
Atg12	402.704	438.341	440.344	385.462	404.458	395.202	-0.116797	0.47627	0.999927	427.13	395.04
Atg13	552.121	579.321	612.508	434.971	516.807	591.092	-0.177698	0.263041	0.999927	581.317	514.29
Atg14	143.024	144.534	193.133	142.338	159.429	159.107	-0.0437025	0.849566	0.999927	160.23	153.625
Atg16l1	409.097	459.666	444.758	523.38	422.648	488.442	0.131363	0.412081	0.999927	437.84	478.156
Atg16l2	80.7007	62.7894	57.3881	72.4951	59.9196	68.4332	-0.00376416	0.990282	0.999927	66.9594	66.9493
Atg2a	369.146	328.163	257.143	274.951	271.778	449.093	0.0366915	0.836149	0.999927	318.151	331.941
Atg2b	1090.66	1069.79	1227.22	1159.92	1310.74	1240.35	0.136681	0.251038	0.999927	1129.22	1237.01
Atg3	777.443	899.192	802.33	1018.47	907.355	822.909	0.149203	0.291362	0.999927	826.322	916.244
Atg4a	58.3282	60.42	34.2122	47.7407	39.5898	47.9033	-0.145938	0.703108	0.999927	50.9868	45.0779
Atg4b	518.562	526.009	506.561	491.552	491.127	530.357	-0.0352248	0.808009	0.999927	517.044	504.346
Atg4c	186.97	194.292	259.35	213.949	236.469	177.071	-0.0208133	0.916708	0.999927	213.537	209.163
Atg4d	392.317	456.112	297.977	360.707	265.358	427.708	-0.118685	0.492669	0.999927	382.135	351.258
Atg5	632.821	664.62	695.279	709.922	629.156	555.165	-0.0799806	0.575311	0.999927	664.24	631.414
Atg7	405.9	458.481	403.924	387.23	380.918	406.322	-0.107459	0.493585	0.999927	422.769	391.49
Atg9a	376.337	361.335	289.148	362.476	344.538	368.684	0.0753136	0.657877	0.999927	342.273	358.566
Atg9b	61.5243	85.2988	57.3881	114.931	71.6896	90.674	0.461641	0.175271	0.999927	68.0704	92.4316
Athl1	366.749	299.731	333.293	376.621	235.399	331.046	-0.0821125	0.695813	0.999927	333.257	314.355
Atic	417.886	388.583	331.085	508.35	344.538	319.925	0.0440029	0.830289	0.999927	379.185	390.938
Atl1	48.74	61.6047	72.8388	63.6543	56.7097	53.8912	-0.0546926	0.875853	0.999927	61.0612	58.085
Atl2	985.188	1251.05	1298.96	1279.27	1310.74	1039.33	0.0365053	0.786318	0.999927	1178.4	1209.78
Atl3	1478.18	1651.48	1792.28	1714.24	1776.19	1555.14	0.0366819	0.750091	0.999927	1640.65	1681.86
Atm	1459	1407.43	1859.6	1701.87	1784.75	1565.41	0.107397	0.334666	0.999927	1575.34	1684.01
Atmin	499.385	510.608	533.048	465.914	538.207	503.84	-0.0296139	0.843297	0.999927	514.347	502.653
Atn1	101.475	98.3306	73.9424	85.7564	78.1095	107.782	-0.0118493	0.966009	0.999927	91.2494	90.5494
Atoh8	1.59803	14.2165	4.41447	1.76817	1.06999	3.42166	-1.72659	0.171765	NA	6.74299	2.08661
Atox1	316.411	421.755	236.174	297.053	237.539	363.551	-0.113083	0.556012	0.999927	324.78	299.381
Atp10a	97.48	55.6812	97.1184	91.061	73.8296	81.2645	-0.0178826	0.955346	0.999927	83.4265	82.0517
Atp10b	177.382	137.426	171.061	262.574	136.959	110.349	0.0552069	0.856816	0.999927	161.956	169.961
Atp10d	116.656	85.2988	96.0148	92.8291	118.769	94.9511	0.0323788	0.903481	0.999927	99.3233	102.183
Atp11a	3457.35	3563.59	3519.44	4178.2	4208.29	4667.15	0.312456	0.00248438	0.467737	3513.46	4351.21
Atp11b	1143.39	1158.64	1478.85	1259.82	1292.55	1082.1	-0.0520363	0.656195	0.999927	1260.29	1211.49
Atp11c	393.915	425.309	533.048	374.853	532.857	389.214	-0.0543655	0.749427	0.999927	450.757	432.308
Atp13a1	948.433	1059.13	782.465	1080.35	808.915	1141.12	0.126813	0.373897	0.999927	930.008	1010.13
Atp13a2	646.404	649.219	374.127	376.621	365.938	680.055	-0.245958	0.125522	0.999927	556.583	474.205
Atp13a3	3457.35	3434.46	4136.36	4365.62	3557.73	2990.53	-0.0160144	0.897678	0.999927	3676.06	3637.96
Atp13a4	306.023	215.616	338.811	321.808	105.929	124.891	-0.635485	0.0537292	0.999927	286.817	184.209
Atp13a5	1642.78	1844.59	1977.68	2487.82	2202.05	2082.94	0.315238	0.00882481	0.782038	1821.68	2257.6
Atp1a1	32276.3	37010.2	30391.4	45201.6	37205.8	40692.1	0.321281	0.0130561	0.899413	33226	41033.2
Atp1a2	109.465	978.567	83.875	92.8291	745.786	99.2282	-0.0343221	0.979245	0.999927	390.636	312.614
Atp1a3	15.9803	8.29294	5.51809	3.53635	4.27997	8.55415	-0.843576	0.350262	0.999927	9.93045	5.45683
Atp1a4	13.5833	15.4012	29.7977	20.334	16.0499	19.6746	0.0340997	0.955629	0.999927	19.594	18.6862
Atp1b1	11497.1	12017.7	12576.8	12379.9	14133.5	12395.8	0.110331	0.280412	0.999927	12030.5	12969.7
Atp1b2	5.59312	1.18471	8.82895	0.884087	6.41996	3.42166	-0.434371	0.723112	NA	5.20226	3.57524
Atp1b3	885.31	1029.51	904.967	1130.75	831.385	754.476	-0.067727	0.676072	0.999927	939.929	905.536
Atp1b4	0.799017	0	1.10362	1.76817	3.20998	0	0.911388	0.661321	NA	0.634212	1.65939
Atp2a1	23.9705	200.215	27.5905	21.2181	25.6798	32.5058	-1.50729	0.00929822	0.788302	83.9254	26.4679
Atp2a2	5636.26	6968.44	7324.71	8945.19	7403.29	6780.02	0.227911	0.0806718	0.999927	6643.14	7709.5
Atp2a3	35359.7	35311.3	29185.2	39057.2	25775.1	34801.7	0.00773583	0.957493	0.999927	33285.4	33211.3
Atp2b1	1744.25	1755.73	1897.12	2036.94	1855.37	1632.13	0.0362708	0.765541	0.999927	1799.04	1841.48
Atp2b2	27.9656	29.6176	14.347	70.727	29.9598	38.4937	1.03001	0.0669523	0.999927	23.9768	46.3935
Atp2b3	4.7941	3.55412	4.41447	6.18861	8.55995	9.40957	0.909512	0.387884	0.999927	4.25423	8.05271
Atp2b4	215.734	220.355	171.061	188.311	197.949	213.854	-0.0117348	0.954999	0.999927	202.384	200.038
Atp2c1	1564.47	1645.56	1787.86	1838.9	1893.89	1662.07	0.112908	0.304601	0.999927	1665.96	1798.29
Atp2c2	26.3675	9.47764	11.0362	45.0884	9.62994	13.6866	0.543086	0.473943	0.999927	15.6271	22.8017
Atp4a	1346.34	1728.49	974.495	681.631	798.215	1283.98	-0.558347	0.00363113	0.547365	1349.77	921.275
Atp5a1	13086.3	16572.8	12395.8	13748.4	13316.1	14308.5	-0.0160473	0.888862	0.999927	14018.3	13791
Atp5b	17865.2	23703.6	18313.4	21731.7	21884.6	20284.5	0.100263	0.416629	0.999927	19960.7	21300.3
Atp5c1	3556.42	4459.23	3926.67	4091.55	4113.06	3795.48	0.00205881	0.986387	0.999927	3980.78	4000.03
Atp5d	1133.01	1393.21	693.072	891.16	719.036	1218.11	-0.165137	0.231636	0.999927	1073.1	942.769
Atp5e	896.497	1438.23	842.061	1045.87	860.275	1076.11	-0.0938259	0.591883	0.999927	1058.93	994.087
Atp5f1	3025.88	3652.45	3167.38	3600.89	3541.68	2978.56	0.0304985	0.807305	0.999927	3281.9	3373.71
Atp5g1	1034.73	1344.64	762.6	1263.36	853.855	1099.21	0.0602075	0.71916	0.999927	1047.32	1072.14
Atp5g2	182.975	191.922	110.362	129.077	115.559	175.36	-0.194622	0.39154	0.999927	161.753	139.999
Atp5g3	1900.06	2324.39	2091.36	2518.76	2092.91	2001.67	0.0626565	0.649477	0.999927	2105.27	2204.45
Atp5h	1435.83	2024.66	1529.61	1621.42	1770.84	1595.35	-0.00383283	0.979628	0.999927	1663.37	1662.53
Atp5j	1517.33	2072.05	1936.85	1786.74	1749.44	1571.4	-0.119977	0.394431	0.999927	1842.08	1702.53
Atp5j2	1450.22	1910.93	1318.82	1659.43	1293.62	1570.54	-0.0496878	0.736908	0.999927	1559.99	1507.87
Atp5k	960.418	1467.85	836.543	1125.44	957.644	1077.82	-0.0409311	0.81354	0.999927	1088.27	1053.64
Atp5l	108.666	138.611	87.1858	86.6405	89.8795	106.071	-0.235528	0.385315	0.999927	111.488	94.1972
Atp5o	1987.15	2872.91	1879.46	2375.54	1966.65	2195	-0.0438398	0.773736	0.999927	2246.51	2179.06
Atp5s	88.6908	110.178	102.636	80.4519	119.839	96.6619	-0.0221523	0.94041	0.999927	100.502	98.9844
Atp5sl	334.788	335.272	294.666	369.548	349.888	326.769	0.116261	0.48626	0.999927	321.575	348.735
Atp6ap1	2419.42	2820.78	2563.71	3141.16	2710.29	2674.03	0.133021	0.285373	0.999927	2601.3	2841.83
Atp6ap2	1335.96	1502.21	1593.62	2097.05	1495.85	1289.11	0.128118	0.410616	0.999927	1477.26	1627.34
Atp6v0a1	673.571	691.868	704.108	822.201	734.016	714.272	0.138086	0.321812	0.999927	689.849	756.829
Atp6v0a2	1466.2	1700.05	1447.95	1777.9	1547.21	1493.56	0.0652231	0.616109	0.999927	1538.07	1606.22
Atp6v0b	1407.07	1819.71	1252.61	1544.5	1423.09	1596.2	0.0315898	0.81145	0.999927	1493.13	1521.27
Atp6v0d1	990.781	1028.32	952.423	877.014	885.955	999.98	-0.105541	0.38839	0.999927	990.509	920.983
Atp6v0d2	1648.37	1944.1	2249.17	1847.74	2665.35	2106.89	0.187148	0.210633	0.999927	1947.22	2206.66
Atp6v0e	715.919	800.861	696.383	587.034	671.956	653.537	-0.213393	0.160519	0.999927	737.721	637.509
[truncated: 14,920 more rows]
