# Supplementary material for: Cell-specific and shared enhancers control a high-density multi-gene locus active in mammary and salivary glands
Source: Research Square preprint supplement (doi:10.21203/rs.3.rs-2533579/v1), 2023-02-07
Supplement: Supplementary file 1 [file c20b96a19855a89213218fd0.docx]

**Supplementary information**

Cell-specific and shared enhancers control a high-density multi-gene locus active in mammary and salivary glands

Hye Kyung Lee1,*, Michaela Willi1, Chengyu Liu2, Lothar Hennighausen1,*

1Laboratory of Genetics and Physiology, National Institute of Diabetes and Digestive and Kidney Diseases, US National Institutes of Health, Bethesda, Maryland 20892, USA.

2Transgenic Core, National Heart, Lung, and Blood Institute, US National Institutes of Health, Bethesda, Maryland 20892, USA.

* Correspondence to: H.K.L ([hyekyung.lee@nih.gov](mailto:hyekyung.lee@nih.gov)) and L.H ([lotharh@niddk.nih.gov](mailto:lotharh@niddk.nih.gov))

**Supplementary Figures**

**
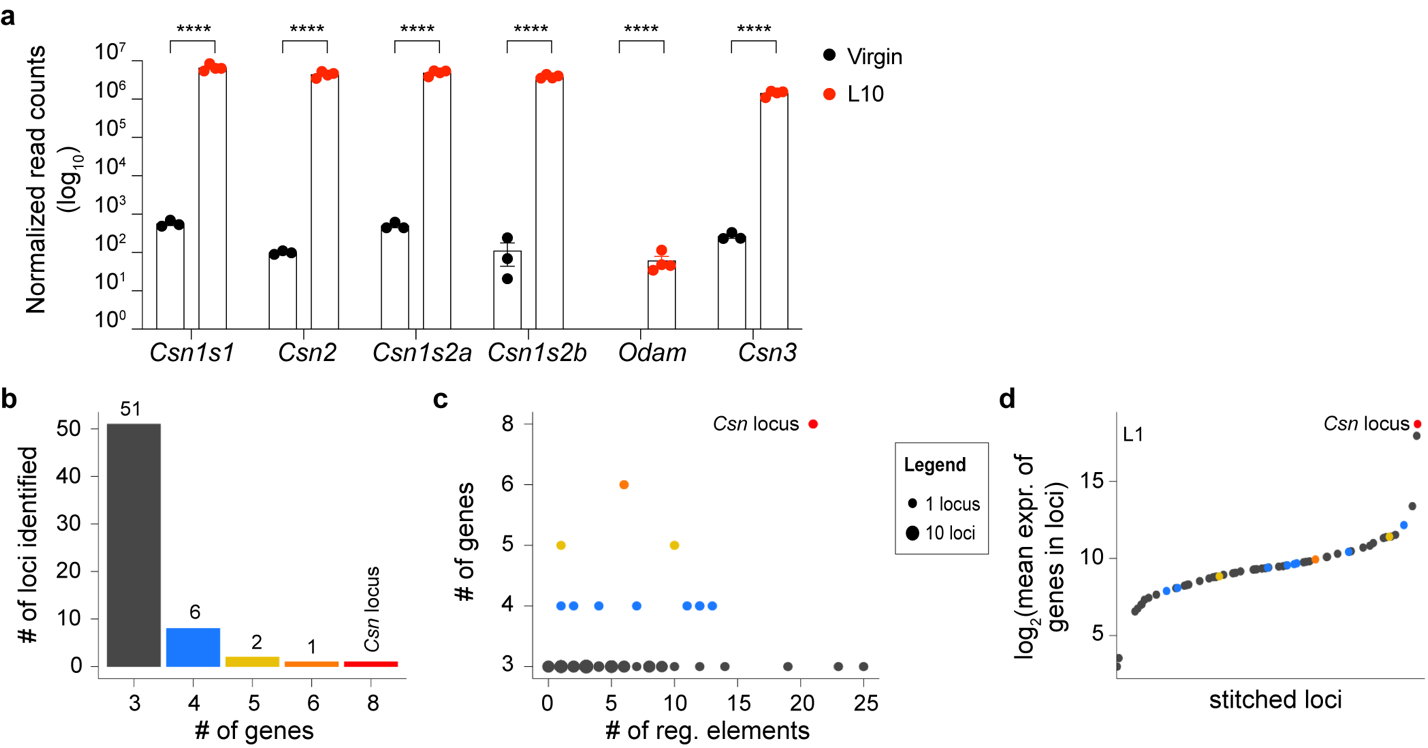
**

**Supplementary Fig. 1.** **Identification of loci with complex enhancers and stitched genes.** **a,** mRNA levels of *Casein* genes were measured by RNA-seq at virgin and lactation day ten (L10) (virgin, *n* = 3; L10, *n* = 4). **b,** The bar plot shows the number of genes within multi-gene loci identified by stitching genes induced more than 2-fold between p6, L1 and L10 of lactation. **c,** The plot compares the number of regulatory elements to the number of stitched genes in each multi-gene locus. **d,** The casein locus contains the highest expressed genes during pregnancy.

**
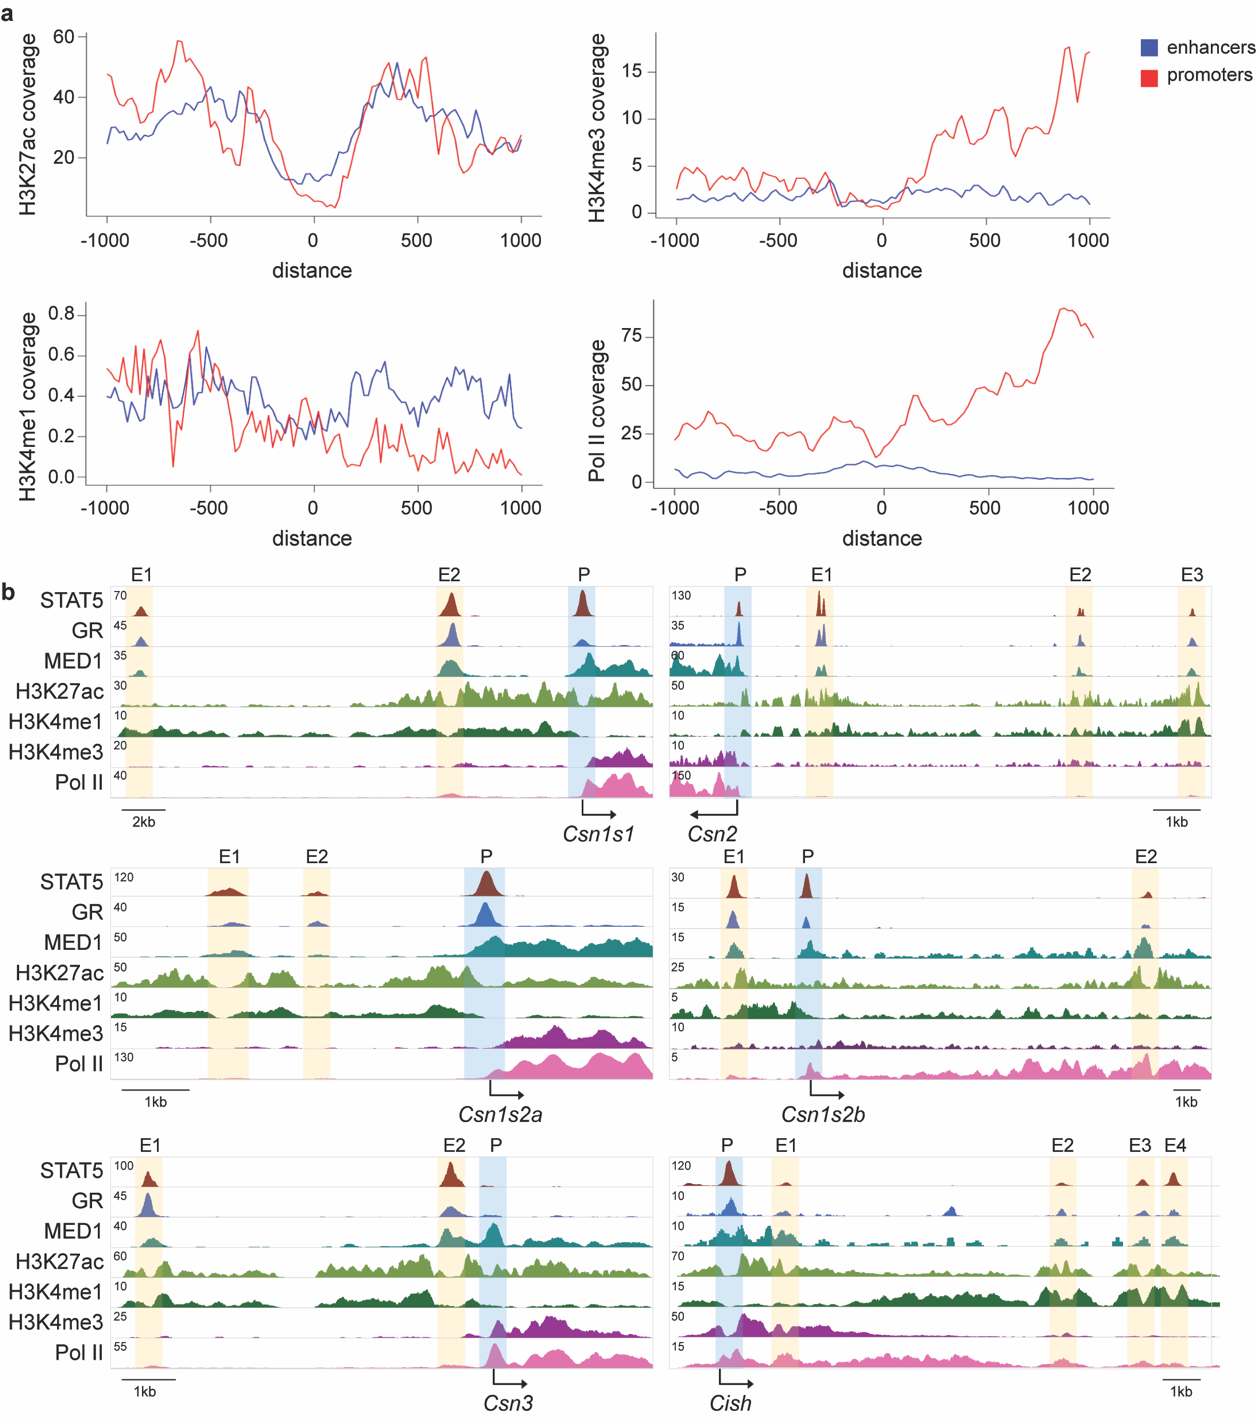
**

**Supplementary Fig. 2** **Genomic features of putative enhancers and promoters in the *Casein* locus.** **a,** The coverage plots show the patterns of enhancer marks, H3K27ac and H3K4me1, and promoter marks, H3K4me3 and Pol II, within the *Casein* locus (blue, enhancers; red, promoters). **b,** STAT5, GR, H3K27ac, H3K4me1, H3K4me3 and Pol II landscape displays the regulatory elements on individual gene loci in the *Casein* locus at L1. The highlighted orange and blue shades indicate the enhancers and promoters, respectively. The *Cish* locus served as control. STAT5 peaks on Csn1s1-P, Csn2-P, E1 and E2, Csn1s2a-P, E1 and E2, Csn1s2b-P, E1 and E2, Csn-SE-E3 and Csn-E2 coincide with GAS motifs.

**
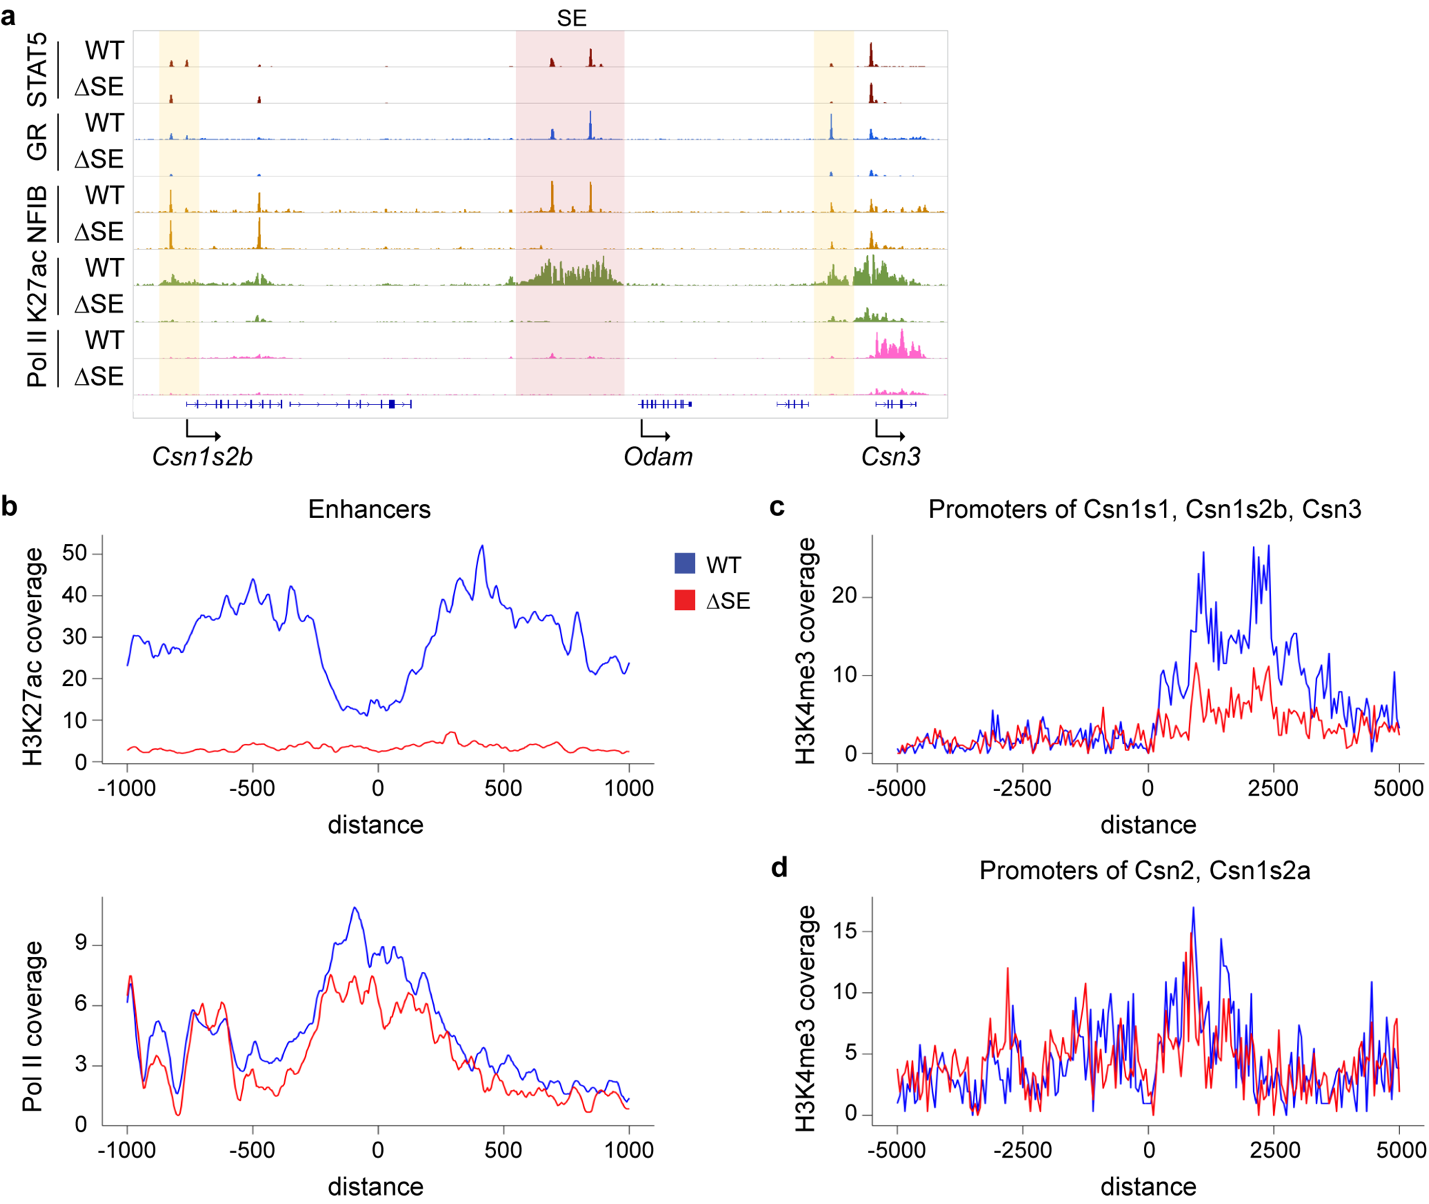
**

**Supplementary Fig. 3** **Genomic features of the *Casein* locus upon deletion of the super-enhancer.** **a,** ChIP-seq analysis confirmed the loss of enhancers in mammary tissues of the respective mutant mice at L1. **b,** The coverage plots show that H3K27ac and Pol II were strongly reduced at the enhancer elements in the *casein* locus (blue, WT; red, mutant). **c,** Coverage plot showing H3K4me3 at the transcription start sites of the *Csn1s1*, *Csn1s2b* and *Csn3* genes was reduced in accordance with the reduction in gene expression in mutant mice (blue, WT; red, mutant). **d,** Coverage plot showing H3K4me3 at the Csn2 and Csn1s2a genes was equal in WT and mutants (blue, WT; red, mutant).

**
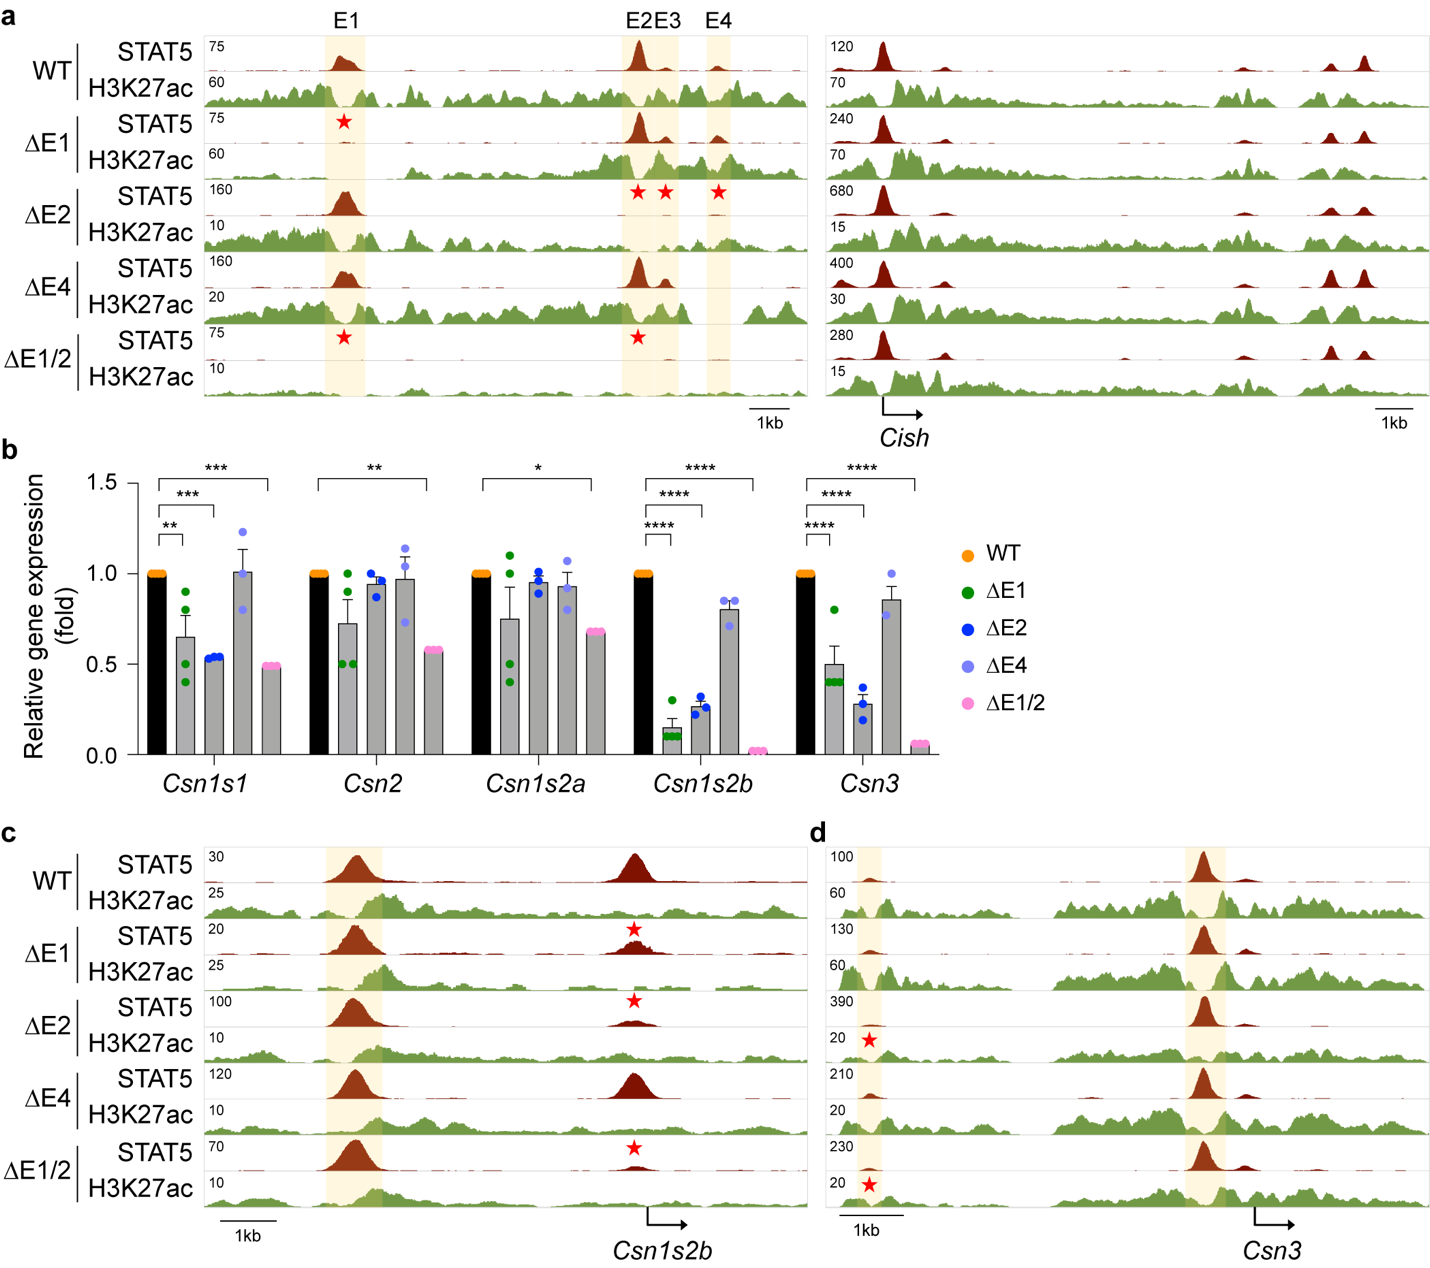
**

**Supplementary Fig. 4** **Biological roles of constituent enhancers from the super-enhancer.** **a,** ChIP-seq assays confirmed loss of enhancers in mammary tissue from ΔE1, ΔE2, ΔE4 and ΔE1/2 mice (red asterisk). In ΔE2, E3 and E4 failed to be established (red asterisk). The *Cish* locus served as control. **b,** Expression of *Csn* genes was measured in mammary tissue of mice carrying individual enhancer deletions by qRT-PCR at L1 and normalized to *Gapdh* levels (WT, *n* = 6; ΔE1, ΔE2, ΔE4 and ΔE1/2, *n* = 4). ANOVA was used to evaluate the statistical significance of differences between WT and mutants. * < 0.05, **< 0.001, ***< 0.0001, ****< 0.00001. **c-d,** STAT5A and H3K27ac landscape of the *Csn1s2b* (c) and *Csn3* (d) region was shown by ChIP-seq in WT and mutant mammary tissues at L1. Red asterisks indicate decreased binding. The highlighted orange boxes indicate the enhancers.

**
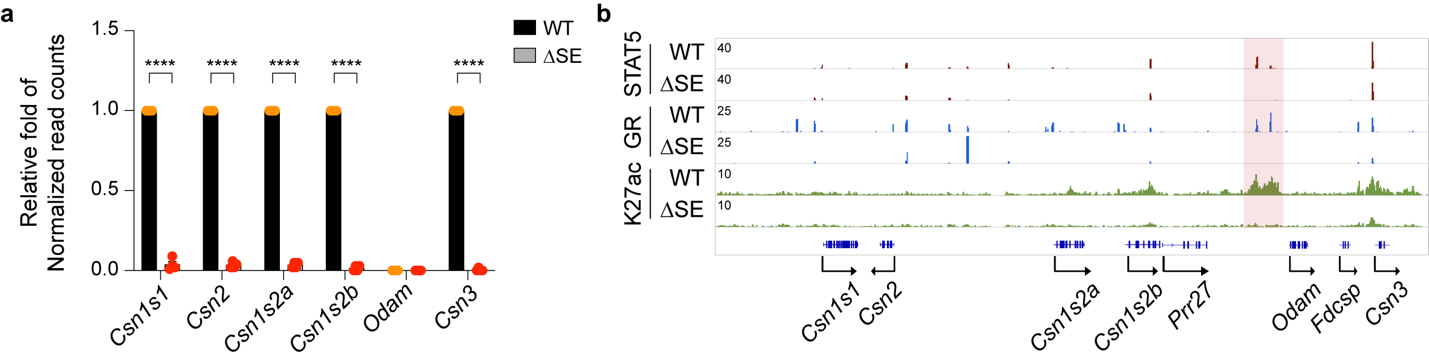
**

**Supplementary Fig. 5** **Roles of super-enhancer in expression of the *Csn* genes during early pregnancy.** **a,** Mammary expression of *Csn* genes in WT and ΔSE mice at p6 was analyzed by RNA-seq (WT, *n* = 3; ΔSE, *n* = 4). **b,** Genomic characteristics of the *Casein* locus was determined by ChIP-seq for STAT5, GR and H3K27ac in WT and ΔSE tissues at p6. The red shade indicates the super-enhancer.

**
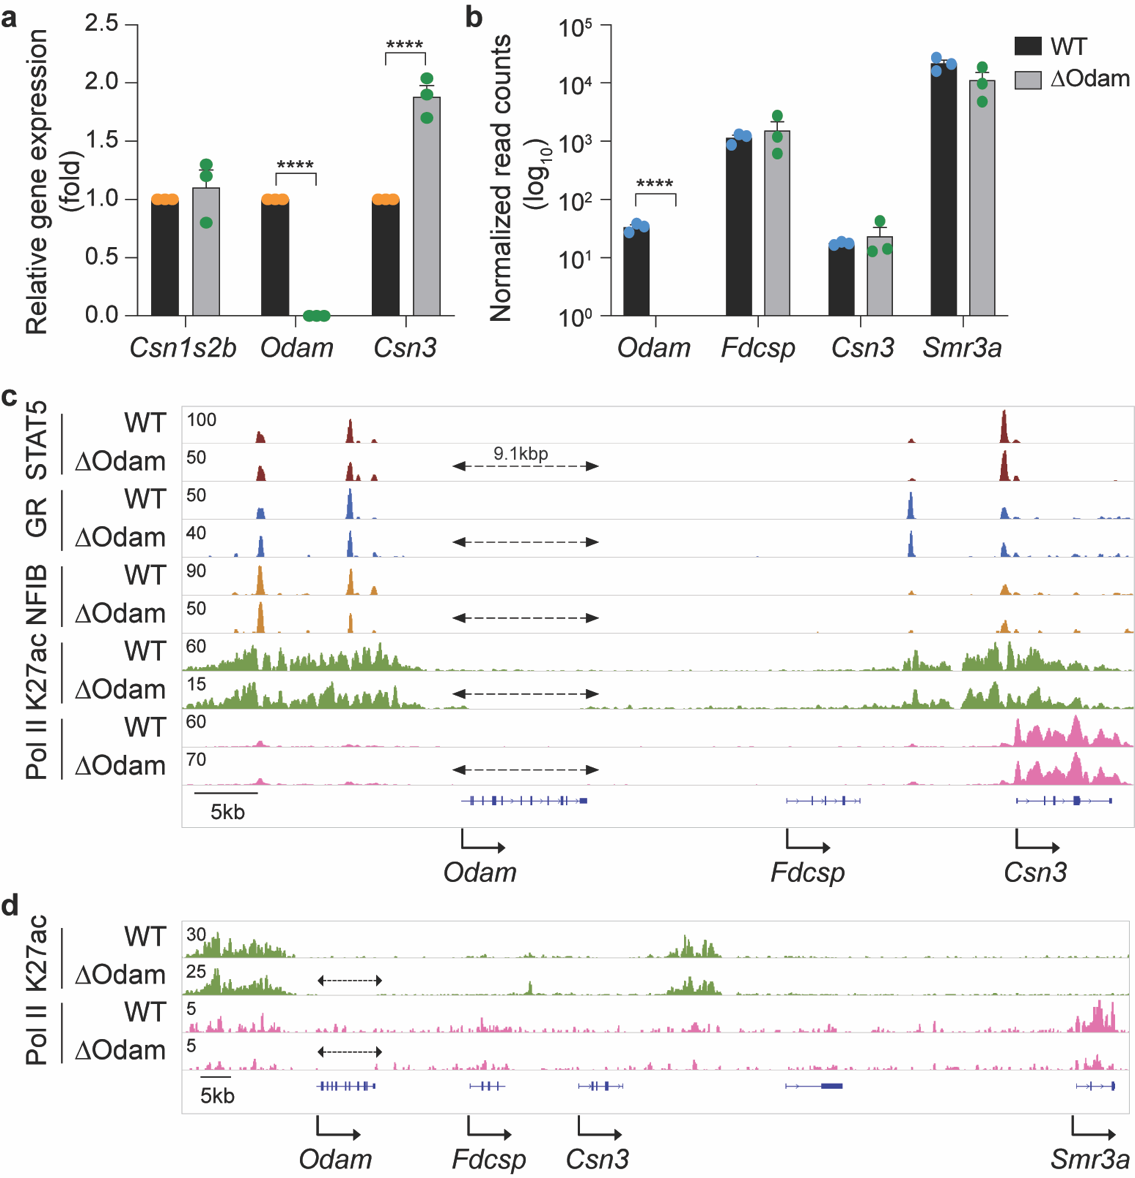
**

**Supplementary Fig. 6** **Role of *Odam* gene in the function of super-enhancer. a,** *Odam* and *Csn3* mRNA levels were measured by qRT-PCR in lactating mammary tissues, from WT and ΔOdam female mutant mice (normalized to *Gapdh* levels). Results are shown as the means ± s.e.m. of independent biological replicates (*n* = 3). A *t*-test was used to evaluate the statistical significance of differences in WT and mutants. **b,** mRNA levels of salivary expressed gene in the *Csn* locus were measured by RNA-seq (*n* = 3). **c-d,** Genomic features of the Odam-*Csn3* locus were characterized by ChIP-seq in lactating mammary and salivary tissues from WT and ΔOdam mutants.

**
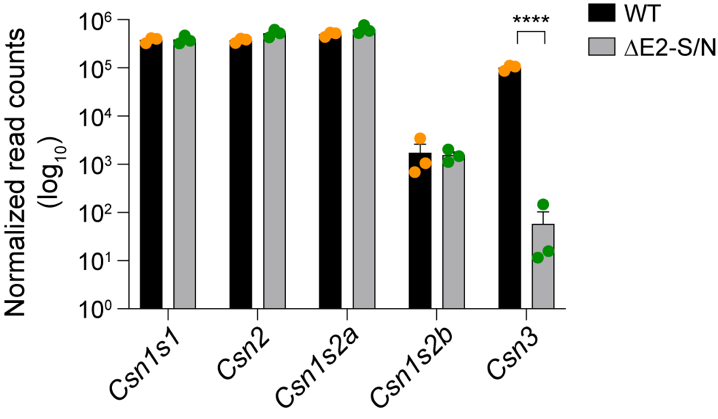
**

**Supplementary Fig. 7** mRNA levels of *Csn* genes were measured by RNA-seq in lactating mammary tissue from WT and mice lacking the *Csn3* proximal enhancer (ΔE2-S/N) (*n* = 3). A *t*-test was used to evaluate the statistical significance of differences in WT and mutant.

**Supplementary Tables**

Supplementary Table 1. (separate Excel file)

List of all genes with normalized read counts in each replicate at p6 and L1 mammary tissue from WT mice, log2 (fold change), their *p*-value and adjusted *p*-value.

Supplementary Table 2. (separate Excel file)

List of all genes with normalized read counts in each replicate at p18 mammary tissue from WT and ∆SE mutant, log2 (fold change), their *p*-value and adjusted *p*-value.

Supplementary Table 3. (separate Excel file)

List of all genes with normalized read counts in each replicate at p6 mammary tissue from WT and ∆SE mutant, log2 (fold change), their *p*-value and adjusted *p*-value.

Supplementary Table 4. (separate Excel file)

List of all genes with normalized read counts in each replicate at salivary tissue from WT and ∆SE mutant, log2 (fold change), their *p*-value and adjusted *p*-value.

Supplementary Table 5. (separate Excel file)

List of all genes with normalized read counts in each replicate at salivary tissue from WT and ∆Odam mutant, log2 (fold change), their *p*-value and adjusted *p*-value.

Supplementary Table 6. (separate Excel file)

List of all genes with normalized read counts in each replicate at p18 mammary tissue from WT and ∆Csn3-E2-S/N mutant, log2 (fold change), their *p*-value and adjusted *p*-value.

Supplementary Table 7.

Sequences of sgRNA for CRISPR/Cas9 targeted mice.

| Target site | | sgRNA sequences |
| --- | --- | --- |
| SE | E1 | 5’-AACAACCTAACTCTTGAAATTGG-3’ |
| E2 | 5’-TATACAGGAGGTTTGGAACTCCAGG-3’  5’-GGAATAATTTGGGGTCAGTGAGG-3’ |
| E1-4 | 5’-CGCTAAGCATGTAGGGTCTCAGG-3’  5’-TGGGTGTTCTTCCACTAGACAGG-3’ |
| Csn3 | E1 | 5’-GGCTATCCATTTTCTGCTGTAGG-3’  5’-TTGTCCAACAGAGATTTTGTTGG-3’  5’-AAGTGAAGGTCAGCGTAATGAGG-3’ |
| E2 | 5’-CAGGTCATCCTATTGCCTCAAGG-3’  5’-GTGTAATGGTTCCCAGAAACAGG-3’ |
| Csn1s1 | E1 | 5’-AATTGATTCAGAACATGTCCAGG-3’ |
| E2 | 5’-TGAAAGGATGGCACTCTCTGCGG-3’  5’-TTTGCCATGATCTGACTACGTGG-3’ |
| Odam |  | 5’-GTCAGTTAAACTCCAGGTAGGGG-3’  5’-ACTTACCGGGGCTGATGATGAGG-3’  5’-CCAGTGTTGCTTCTCGTAGAAGG-3’  5’-AACTACTTAGTAGGTAGGCCAGG-3’ |

Supplementary Table 8.

Characterization of mutant mice generated by CRISPR/Cas9. The GAS and NFIB motifs are highlighted in yellow and blue.

| Mice | Target sequence at SE-E1 |
| --- | --- |
| WT  ΔE1 | 410bp  ACAACAACCTAACTCTTGAAATTGGCAAGC…TATAGCACATGCTCTGAGTTATACTAAATT  ACAACAACCT--------------------…--------------------ATACTAAATT |

| Mice | Target sequence at SE-E2 |
| --- | --- |
| WT  ΔE2  ΔE1/2 | 680bp  TTATACAGGAGGTTTGGAACTCCAGGTTTT…CCAAACATCAACCTCACTGACCCCAAATTA  TTATACAGGA--------------------…--------------------CCCCAAATTA  TTATACAGGAGGTTTGGAACT---------…--------------------CCCCAAATTA |

| Mice | Target sequence at SE-E4 |
| --- | --- |
| WT  ΔE4 | 830bp  AGTATAGTCATAAATATAACAGCCAAAACA…TGCACTATCCAGTGTTTTGGTCCCAAATAAA  AGTATAGTCA--------------------…---------------------CCCAAATAAA |

| Mice | Target sequence at SE |
| --- | --- |
| WT  ΔSE | 9kb  AACCTCCTGAGACCCTACATGCTTAGCGTTT…GTGAGCTCACTCCTGTCTAGTGGAAGAACA  AACCTCCTGAG--------------------…--------------------TGGAAGAACA |

| Mice | Target sequence at Csn3-E1 |
| --- | --- |
| WT  ΔE1 | 240bp 173bp  TCCATTTTCTG…GTCATCCAACAAAATCTCTGTT…TGAAGGTCAGCGTAATGAGGCACTTA  TCCATTTTCTG…GTCATC----------------…--------------------CACTTA |

| Mice | Target sequence at Csn3-E2 |
| --- | --- |
| WT  ΔE2-S  ΔE2-S/N | 77bp 82bp 211bp 360bp  CCCTTGAG…AACTTCTAAGAAATA…TGGTTCCCAGAAACAGG…TTGGCAG…AAATGTGAAA  CCCTT---…---------------…-------------CAGG…TTGGCAG…AAATGTGAAA  --------…---------------…-----------------…-------…-----TGAAA |

| Mice | Target sequence at Csn1s1-E1 |
| --- | --- |
| WT  ΔE1 | GTAGACTCAAAATAATTGCAATTGATTCAGAACATGTCCAGGAAGTACACAATGTTGATTT  GTAGACTCAAAATAATTGCAATTGAT-----------CCAGGAAGTACACAATGTTGATTT |

| Mice | Target sequence at Csn1s1-E2 |
| --- | --- |
| WT  ΔE2 | 128bp 13bp  CCCGCAGAGAGTGCCATCCT…GTCTTGGCACTG…CCTTTGCCATGATCTGACTACGTGGTA CCCGCAGAGA----------…------------…-----------------CTACGTGGTA |

| Mice | Target sequence at Odam |
| --- | --- |
| WT  ΔOdam | 9.1kb  GAGTGGGAATAGCGTGTCTCTGACTCTTGC…TGACTCTTCCTTCTACGAGAAGCAACACTG GAGTGGGAAT--------------------…--------------------AGCAACACTG |
