# Supplementary material for: Cell-specific and shared enhancers control a high-density multi-gene locus active in mammary and salivary glands
Source: Research Square preprint supplement (doi:10.21203/rs.3.rs-2533579/v1), 2023-02-07
Supplement: Supplementary file 2 [file 3c0fe7277e1f95db6ec38cd5.xlsx]

## Sheet: SG_sorted3_SE-allGenes-withFC-w
Gene	WT_SG_rep1	WT_SG_rep2	WT_SG_rep3	SE_SG_rep1	SE_SG_rep2	SE_SG_rep3	log2FoldChange	pvalue	padj	WT_mean	SE_mean
0610005C13Rik	11.1862	5.92353	7.72533	15.3973	7.79668	13.0193	0.46934	0.586614	NA	8.27836	12.0711
0610007P14Rik	166.195	199.031	176.579	158.079	189.348	139.206	-0.162605	0.464396	NA	180.602	162.211
0610009B22Rik	222.127	240.495	229.553	174.503	242.811	191.283	-0.191759	0.342541	NA	230.725	202.865
0610009L18Rik	20.7744	15.4012	18.7615	19.5033	28.9591	17.0252	0.216505	0.708393	NA	18.3124	21.8292
0610009O20Rik	464.229	445.449	419.375	444.469	349.737	477.706	-0.077852	0.620279	NA	443.018	423.971
0610010F05Rik	468.224	539.041	561.742	516.323	590.32	533.789	0.0674033	0.665453	NA	523.002	546.811
0610010K14Rik	112.661	86.4835	89.3931	94.4368	96.9016	97.1437	-0.00359267	0.989793	NA	96.1793	96.1607
0610011F06Rik	246.896	287.883	218.516	219.668	252.835	226.335	-0.102387	0.590758	NA	251.099	232.946
0610012G03Rik	216.534	268.928	214.102	198.112	256.177	204.302	-0.0890912	0.660266	NA	233.188	219.53
0610030E20Rik	379.533	345.934	429.307	523.508	393.175	458.678	0.250848	0.142101	NA	384.925	458.454
0610037L13Rik	189.367	216.801	214.102	220.695	212.738	252.373	0.144018	0.476698	NA	206.757	228.602
0610038B21Rik	1.59803	3.55412	2.20724	6.15892	3.34143	0	0.0830339	0.966057	NA	2.45313	3.16679
0610039H22Rik	5.59312	4.73882	5.51809	12.3178	7.79668	12.0178	0.987219	0.266779	NA	5.28334	10.7108
0610040B10Rik	11.9852	11.8471	27.5905	21.5562	14.4795	15.0222	0.0883403	0.887955	NA	17.1409	17.0193
0610040F04Rik	3.99508	2.36941	4.41447	3.07946	1.11381	2.00296	-0.841597	0.567411	NA	3.59299	2.06541
0610040J01Rik	763.86	787.829	667.689	531.72	554.678	702.038	-0.316082	0.0472707	NA	739.793	596.145
0610043K17Rik	39.1518	35.5412	45.2483	53.3773	34.5281	39.0578	0.0765479	0.855372	NA	39.9804	42.3211
1110001J03Rik	149.416	207.323	123.605	130.364	191.576	126.187	-0.0992434	0.69012	NA	160.115	149.375
1110002L01Rik	26.3675	29.6176	26.4868	46.1919	28.9591	16.0237	0.134208	0.810229	NA	27.4907	30.3916
1110004E09Rik	147.019	162.305	150.092	121.125	125.861	147.218	-0.222126	0.414783	NA	153.139	131.401
1110004F10Rik	572.895	646.849	571.674	603.574	693.904	579.857	0.0659224	0.640431	NA	597.139	625.779
1110006O24Rik	8.78918	1.18471	3.31085	5.13243	5.56906	6.00889	0.330982	0.77812	NA	4.42825	5.57013
1110007C09Rik	173.387	178.891	116.984	136.523	141.454	161.238	-0.0747514	0.746484	NA	156.42	146.405
1110008F13Rik	202.95	202.585	162.232	142.682	179.324	170.252	-0.199979	0.382309	NA	189.256	164.086
1110008L16Rik	213.337	223.909	258.247	214.536	241.697	224.332	-0.0243846	0.901356	NA	231.831	226.855
1110008P14Rik	314.014	459.666	286.941	282.284	269.542	282.418	-0.330012	0.0802502	NA	353.54	278.081
1110012L19Rik	147.818	140.98	123.605	108.808	163.73	116.172	-0.0972443	0.688452	NA	137.468	129.57
1110019D14Rik	84.6958	88.8529	140.16	108.808	112.495	93.1377	0.036953	0.893648	NA	104.569	104.813
1110020A21Rik	12.7843	14.2165	19.8651	19.5033	12.2519	13.0193	-0.0541094	0.936718	NA	15.622	14.9248
1110028F11Rik	24.7695	11.8471	30.9013	33.8741	17.821	35.0518	0.323214	0.533751	NA	22.506	28.9156
1110032A03Rik	359.557	381.475	432.618	363.376	397.631	358.53	-0.0637681	0.709898	NA	391.217	373.179
1110032F04Rik	3.19607	0	4.41447	4.10595	10.0243	0	0.154012	0.93311	NA	2.53685	4.71008
1110034G24Rik	56.7302	46.2035	49.6628	56.4568	70.1701	42.0622	0.118225	0.747234	NA	50.8655	56.2297
1110037F02Rik	1096.25	1181.15	1332.07	1287.21	1171.73	1201.78	0.0253734	0.83128	0.960096	1203.16	1220.24
1110038B12Rik	31.9607	30.8023	26.4868	60.5627	72.3977	50.074	1.0268	0.00892858	NA	29.7499	61.0115
1110038F14Rik	112.661	111.362	99.3256	105.728	121.405	116.172	0.087784	0.732486	NA	107.783	114.435
1110046J04Rik	13.5833	4.73882	3.31085	12.3178	15.5934	2.00296	0.37515	0.690325	NA	7.21099	9.97139
1110051M20Rik	47.941	55.6812	52.9737	57.4833	60.1458	73.1081	0.282283	0.426213	NA	52.1986	63.5791
1110058D11Rik	7.99017	4.73882	14.347	7.18541	7.79668	6.00889	-0.292397	0.752375	NA	9.02534	6.99699
1110059E24Rik	389.121	490.468	464.623	380.827	597.003	331.49	-0.0800745	0.653388	NA	448.071	436.44
1110059G10Rik	122.25	143.349	157.817	178.609	201.6	125.185	0.239979	0.319062	NA	141.139	168.465
1110065P20Rik	12.7843	21.3247	2.20724	8.2119	11.1381	6.00889	-0.0786306	0.930819	NA	12.1054	8.45296
1190002F15Rik	4.7941	0	2.20724	4.10595	6.68287	7.01037	1.25965	0.360113	NA	2.33378	5.93306
1190002N15Rik	141.426	154.012	144.574	156.026	200.486	143.212	0.171651	0.465502	NA	146.671	166.575
1190007I07Rik	27.9656	42.6494	36.4194	44.1389	44.5524	31.0459	0.157707	0.716099	NA	35.6781	39.9124
1200014J11Rik	497.787	456.112	549.602	482.449	473.37	492.729	-0.0502831	0.733084	NA	501.167	482.849
1300002E11Rik	139.828	105.439	173.268	157.053	153.706	139.206	0.117384	0.637699	NA	139.512	149.988
1300017J02Rik	1.59803	1.18471	0	0	13.3657	2.00296	2.17867	0.283138	NA	0.92758	5.1229
1500004A13Rik	20.7744	18.9553	34.2122	46.1919	34.5281	32.0474	0.646212	0.204008	NA	24.6473	37.5892
1500009L16Rik	15.1813	15.4012	15.4507	7.18541	21.1624	14.0207	-0.164682	0.822053	NA	15.3444	14.1229
1500011B03Rik	73.5095	59.2353	72.8388	79.0395	75.7392	63.0933	0.0820508	0.799652	NA	68.5279	72.624
1500011K16Rik	68.7154	108.993	57.3881	75.96	93.5601	70.1037	0.0484539	0.880682	NA	78.3655	79.8746
1500012F01Rik	119.053	67.5282	124.709	141.655	242.811	121.179	0.658626	0.0148316	NA	103.764	168.548
1500015A07Rik	37.5538	21.3247	41.9375	32.8476	52.3491	48.0711	0.417905	0.327251	NA	33.6053	44.4226
1500015L24Rik	0.799017	0	3.31085	4.10595	1.11381	4.00592	1.47686	0.397692	NA	1.36996	3.07523
1500015O10Rik	39.9508	73.4517	45.2483	44.1389	45.6663	43.0637	-0.239304	0.550752	NA	52.8836	44.2896
1500026H17Rik	76.7056	86.4835	116.984	82.119	116.95	64.0948	-0.10979	0.736906	NA	93.3909	87.7213
1600002D24Rik	0	3.55412	1.10362	6.15892	3.34143	4.00592	1.6172	0.312746	NA	1.55258	4.50209
1600002H07Rik	47.142	58.0506	43.0411	56.4568	43.4386	51.0755	0.0328634	0.936626	NA	49.4112	50.3236
1600002K03Rik	83.8967	108.993	70.6316	108.808	116.95	74.1096	0.184387	0.555954	NA	87.8404	99.9558
1600010M07Rik	2.39705	1.18471	1.10362	6.15892	6.68287	2.00296	1.60044	0.245114	NA	1.56179	4.94825
1600012H06Rik	535.341	556.812	554.016	533.773	592.548	526.779	0.00590391	0.96914	NA	548.723	551.033
1600014C10Rik	172.588	175.336	119.191	152.947	238.356	130.193	0.130628	0.580812	NA	155.705	173.832
1600014C23Rik	3.19607	0	6.62171	2.05297	0	6.00889	-1.04485	0.531112	NA	3.27259	2.68729
1600020E01Rik	59.1272	65.1588	76.1497	74.9336	81.3082	67.0992	0.16331	0.616717	NA	66.8119	74.447
1600023N17Rik	4.7941	2.36941	6.62171	2.05297	4.45524	8.01185	0.0729557	0.952766	NA	4.59507	4.84002
1600029I14Rik	1.59803	0	0	1.02649	1.11381	1.00148	0.935579	0.686747	NA	0.532678	1.04726
1700001C19Rik	4.7941	2.36941	0	5.13243	4.45524	1.00148	1.0036	0.52386	NA	2.38784	3.52972
1700001D01Rik	7.99017	0	11.0362	12.3178	8.91049	6.00889	0.636127	0.527242	NA	6.34212	9.07907
1700001G17Rik	0	0	1.10362	2.05297	3.34143	0	1.83478	0.454504	NA	0.367873	1.79814
1700001J03Rik	3.19607	1.18471	4.41447	10.2649	3.34143	5.0074	1.0819	0.3811	NA	2.93175	6.20457
1700001K19Rik	5.59312	7.10823	13.2434	11.2914	10.0243	20.0296	0.629786	0.426586	NA	8.64826	13.7818
1700001K23Rik	3.99508	1.18471	2.20724	9.23838	7.79668	6.00889	1.57285	0.181972	NA	2.46234	7.68132
1700001L05Rik	100.676	103.069	161.128	106.755	70.1701	121.179	-0.311709	0.255766	NA	121.625	99.368
1700001L19Rik	0	1.18471	1.10362	3.07946	0	2.00296	1.04876	0.655825	NA	0.762775	1.69414
1700001O22Rik	27.9656	15.4012	11.0362	19.5033	13.3657	15.0222	-0.125274	0.850621	NA	18.1343	15.9637
1700001P01Rik	0.799017	2.36941	1.10362	4.10595	2.22762	1.00148	0.797747	0.634063	NA	1.42402	2.44502
1700003D09Rik	27.9656	14.2165	60.699	76.9865	31.1867	72.1066	0.872103	0.0460331	NA	34.2937	60.0933
1700003E16Rik	61.5243	69.8976	33.1085	54.4038	36.7558	35.0518	-0.307774	0.424414	NA	54.8435	42.0705
1700003G13Rik	0.799017	2.36941	7.72533	7.18541	1.11381	8.01185	0.655743	0.608271	NA	3.63125	5.43702
1700003M02Rik	4.7941	0	4.41447	2.05297	2.22762	3.00444	-0.235721	0.890043	NA	3.06952	2.42835
1700007J10Rik	15.1813	17.7706	26.4868	16.4238	18.9348	14.0207	-0.256601	0.681546	NA	19.8129	16.4598
1700007K13Rik	3.99508	2.36941	6.62171	3.07946	2.22762	6.00889	-0.2787	0.803179	NA	4.32873	3.77199
1700007L15Rik	17.5784	22.5094	16.5543	25.6622	24.5038	16.0237	0.221018	0.698991	NA	18.8807	22.0632
1700008J07Rik	17.5784	16.5859	22.0724	29.7681	18.9348	17.0252	0.23589	0.677351	NA	18.7455	21.9094
1700009J07Rik	1.59803	3.55412	1.10362	5.13243	4.45524	2.00296	0.960275	0.497464	NA	2.08526	3.86355
1700010I14Rik	9.5882	11.8471	18.7615	12.3178	16.7072	6.00889	-0.246596	0.742609	NA	13.3989	11.678
1700011E24Rik	0.799017	1.18471	3.31085	1.02649	5.56906	1.00148	0.311864	0.848999	NA	1.76486	2.53234
1700011I03Rik	2.39705	2.36941	4.41447	4.10595	1.11381	5.0074	-0.0225593	0.987543	NA	3.06031	3.40905
1700012D01Rik	8.78918	4.73882	18.7615	16.4238	11.1381	16.0237	0.550405	0.463825	NA	10.7632	14.5285
1700012D14Rik	8.78918	4.73882	7.72533	13.3443	16.7072	12.0178	0.970766	0.220236	NA	7.08444	14.0231
1700012D16Rik	2.39705	0	0	5.13243	3.34143	0	2.01324	0.509781	NA	0.799017	2.82462
1700012I11Rik	1.59803	0	3.31085	2.05297	3.34143	2.00296	0.88023	0.70718	NA	1.6363	2.46579
1700015E13Rik	3.99508	1.18471	4.41447	5.13243	7.79668	5.0074	0.860718	0.446998	NA	3.19809	5.97884
1700016C15Rik	59.9262	41.4647	90.4967	69.8011	82.422	54.08	0.145054	0.678227	NA	63.9625	68.7677
1700017B05Rik	1087.46	1216.69	706.316	835.56	605.913	1009.49	-0.298251	0.0282517	0.350858	1003.49	816.989
1700018A04Rik	0	1.18471	3.31085	1.02649	1.11381	3.00444	0.506064	0.823315	NA	1.49852	1.71491
1700018L02Rik	6.39213	5.92353	7.72533	8.2119	3.34143	3.00444	-0.456902	0.657079	NA	6.68033	4.85259
1700019B03Rik	0	0	0	2.05297	3.34143	1.00148	3.39526	0.225057	NA	0	2.13196
1700019D03Rik	124.647	151.642	131.331	132.417	154.82	158.234	0.130947	0.598637	NA	135.873	148.49
1700019G17Rik	50.338	45.0188	58.4918	50.2979	61.2596	52.077	0.0950631	0.792204	NA	51.2829	54.5448
1700019L03Rik	7.99017	2.36941	2.20724	4.10595	5.56906	4.00592	0.183988	0.876558	NA	4.18894	4.56031
1700020D05Rik	0.799017	0	0	2.05297	2.22762	4.00592	2.92274	0.147949	NA	0.266339	2.76217
1700020I14Rik	864.536	934.733	1198.53	937.183	1187.32	912.349	0.0258487	0.845801	0.963004	999.266	1012.28
1700020L24Rik	0	3.55412	0	5.13243	7.79668	5.0074	2.60978	0.100505	NA	1.18471	5.97884
1700021F05Rik	182.176	220.355	183.201	160.132	201.6	191.283	-0.0819027	0.719486	NA	195.244	184.338
1700021K19Rik	451.444	373.182	346.536	431.125	408.769	460.681	0.148919	0.365157	NA	390.388	433.525
1700022H01Rik	0	0	1.10362	3.07946	0	3.00444	2.08938	0.396912	NA	0.367873	2.02797
1700022I11Rik	12.7843	14.2165	16.5543	18.4768	15.5934	14.0207	0.152556	0.815333	NA	14.5183	16.0303
1700024P16Rik	385.126	341.195	442.551	434.204	414.338	440.652	0.145353	0.362879	NA	389.624	429.731
1700025G04Rik	322.004	305.654	322.257	309.999	296.274	305.452	-0.0585303	0.747133	NA	316.638	303.908
1700025N23Rik	0	2.36941	5.51809	1.02649	0	3.00444	-1.1798	0.543512	NA	2.62917	1.34364
1700026L06Rik	0.799017	1.18471	0	1.02649	2.22762	3.00444	1.80729	0.432205	NA	0.661241	2.08618
1700027J07Rik	2.39705	1.18471	5.51809	2.05297	6.68287	1.00148	-0.0890987	0.95078	NA	3.03328	3.24577
1700028E10Rik	3.99508	1.18471	5.51809	17.4503	11.1381	11.0163	1.97724	0.0494531	NA	3.56596	13.2016
1700028J19Rik	181.377	159.935	162.232	155	178.21	152.225	-0.0583224	0.796662	NA	167.848	161.811
1700028K03Rik	6.39213	8.29294	6.62171	7.18541	10.0243	8.01185	0.238261	0.799572	NA	7.10226	8.40719
1700029I15Rik	9.5882	3.55412	8.82895	11.2914	7.79668	7.01037	0.252483	0.781942	NA	7.32375	8.69947
1700029J07Rik	35.1567	18.9553	54.0773	46.1919	59.032	60.0889	0.682636	0.114276	NA	36.0631	55.1043
1700030C10Rik	24.7695	5.92353	6.62171	14.3708	10.0243	18.0267	0.242678	0.785468	NA	12.4383	14.1406
1700030J22Rik	5.59312	4.73882	2.20724	7.18541	6.68287	3.00444	0.399527	0.767027	NA	4.17973	5.62424
1700030K09Rik	51.9361	53.3117	59.5954	59.5362	62.3734	48.0711	0.0371661	0.920084	NA	54.9477	56.6603
1700034H15Rik	11.9852	3.55412	16.5543	18.4768	10.0243	15.0222	0.475281	0.514775	NA	10.6979	14.5078
1700034I23Rik	6.39213	2.36941	11.0362	5.13243	12.2519	13.0193	0.786619	0.40333	NA	6.59924	10.1345
1700034J05Rik	2.39705	4.73882	2.20724	5.13243	4.45524	5.0074	0.668154	0.565455	NA	3.11437	4.86503
1700034P13Rik	0.799017	1.18471	1.10362	1.02649	1.11381	1.00148	0.000211111	0.999925	NA	1.02911	1.04726
1700037C18Rik	23.1715	26.0635	18.7615	32.8476	24.5038	22.0326	0.23733	0.660449	NA	22.6655	26.4613
1700037H04Rik	71.1125	120.84	82.7714	83.1454	102.471	97.1437	0.0511837	0.879018	NA	91.5746	94.2532
1700040L02Rik	27.1666	37.9106	38.6266	32.8476	24.5038	34.0504	-0.186114	0.699645	NA	34.5679	30.4673
1700041A01Rik	15.9803	17.7706	22.0724	15.3973	2.22762	7.01037	-1.23931	0.101776	NA	18.6078	8.21176
1700045H11Rik	3.19607	2.36941	2.20724	3.07946	1.11381	0	-0.944347	0.585805	NA	2.5909	1.39776
1700047A11Rik	5.59312	3.55412	16.5543	11.2914	4.45524	10.0148	0.167083	0.847489	NA	8.56717	8.58714
1700047G03Rik	0.799017	0	2.20724	2.05297	1.11381	0	0.133642	0.96058	NA	1.00208	1.0556
1700047M11Rik	0	2.36941	2.20724	1.02649	0	1.00148	-1.14698	0.623327	NA	1.52555	0.675989
1700048M11Rik	2.39705	0	5.51809	7.18541	4.45524	10.0148	1.56613	0.196086	NA	2.63838	7.21849
1700048O20Rik	4.7941	1.18471	1.10362	6.15892	11.1381	0	0.788935	0.597846	NA	2.36081	5.76568
1700049G17Rik	163.798	169.413	268.179	222.748	237.242	195.289	0.155933	0.465381	NA	200.464	218.426
1700052I22Rik	3.19607	1.18471	0	1.02649	0	2.00296	-0.532988	0.85316	NA	1.46026	1.00982
1700052K11Rik	27.9656	24.8788	32.0049	34.9006	28.9591	40.0592	0.286386	0.535519	NA	28.2831	34.6396
1700056E22Rik	3.19607	1.18471	1.10362	0	6.68287	2.00296	0.433133	0.804759	NA	1.82813	2.89528
1700061G19Rik	4.7941	1.18471	3.31085	4.10595	4.45524	7.01037	0.688798	0.606859	NA	3.09655	5.19052
1700061I17Rik	4.7941	2.36941	15.4507	3.07946	4.45524	7.01037	-0.356585	0.712858	NA	7.53806	4.84836
1700065J18Rik	1.59803	1.18471	0	1.02649	0	2.00296	-0.0866832	0.969516	NA	0.92758	1.00982
1700066B19Rik	12.7843	10.6623	2.20724	8.2119	14.4795	10.0148	0.569285	0.578011	NA	8.55128	10.9021
1700066M21Rik	181.377	161.12	164.439	148.841	222.762	137.203	-0.0228897	0.92234	NA	168.979	169.602
1700066N21Rik	11.9852	7.10823	13.2434	0	0	0	-5.85481	8.60903e-05	NA	10.779	0
1700067K01Rik	11.1862	5.92353	7.72533	13.3443	8.91049	11.0163	0.396509	0.641202	NA	8.27836	11.0904
1700069P05Rik	3.19607	1.18471	5.51809	8.2119	3.34143	2.00296	0.565704	0.618367	NA	3.29962	4.51876
1700071M16Rik	1.59803	3.55412	7.72533	9.23838	3.34143	1.00148	0.212187	0.869181	NA	4.29249	4.5271
1700084C01Rik	0.799017	1.18471	0	3.07946	2.22762	0	1.35608	0.605562	NA	0.661241	1.76903
1700084E18Rik	6.39213	4.73882	2.20724	3.07946	4.45524	2.00296	-0.414421	0.766096	NA	4.44606	3.17922
1700084J12Rik	0.799017	0	1.10362	1.02649	3.34143	4.00592	2.20612	0.251456	NA	0.634212	2.79128
1700086O06Rik	41.5489	39.0953	64.0099	67.7481	43.4386	60.0889	0.249824	0.515978	NA	48.218	57.0919
1700088E04Rik	3.19607	2.36941	1.10362	2.05297	1.11381	2.00296	-0.314505	0.856023	NA	2.22303	1.72325
1700092M07Rik	3.19607	1.18471	4.41447	3.07946	8.91049	8.01185	1.22093	0.336703	NA	2.93175	6.66727
1700094D03Rik	59.9262	53.3117	96.0148	114.967	109.153	96.1422	0.661221	0.0452784	NA	69.7509	106.754
1700094J05Rik	0	0	0	2.05297	0	3.00444	2.63961	0.351382	NA	0	1.68581
1700095J12Rik	0.799017	3.55412	4.41447	9.23838	8.91049	4.00592	1.37118	0.259132	NA	2.92254	7.38493
1700096K18Rik	30.3626	33.1718	60.699	44.1389	38.9834	47.0696	0.122479	0.769897	NA	41.4111	43.3973
1700099I09Rik	2.39705	1.18471	0	4.10595	2.22762	0	1.10624	0.583101	NA	1.19392	2.11119
1700101I11Rik	4.7941	1.18471	3.31085	2.05297	4.45524	0	-1.10865	0.501885	NA	3.09655	2.16941
1700102H20Rik	3.19607	5.92353	5.51809	7.18541	2.22762	1.00148	-0.472079	0.695426	NA	4.87923	3.4715
1700102P08Rik	11.1862	8.29294	7.72533	25.6622	18.9348	18.0267	1.19187	0.0833176	NA	9.06817	20.8745
1700108F19Rik	3.19607	5.92353	5.51809	1.02649	5.56906	7.01037	-0.147463	0.914722	NA	4.87923	4.5353
1700108J01Rik	3.99508	1.18471	5.51809	1.02649	0	4.00592	-1.8643	0.267251	NA	3.56596	1.67747
1700109H08Rik	25.5685	5.92353	22.0724	24.6357	21.1624	25.037	0.396208	0.543894	NA	17.8548	23.6117
1700109K24Rik	17.5784	10.6623	33.1085	34.9006	28.9591	40.0592	0.838441	0.0953419	NA	20.4498	34.6396
1700110C19Rik	1.59803	2.36941	0	4.10595	1.11381	1.00148	1.23898	0.52391	NA	1.32248	2.07375
1700110K17Rik	4.7941	0	2.20724	1.02649	0	3.00444	-1.48855	0.510517	NA	2.33378	1.34364
1700112E06Rik	3.99508	0	4.41447	1.02649	5.56906	1.00148	-0.456136	0.761191	NA	2.80319	2.53234
1700112J16Rik	21.5734	18.9553	30.9013	22.5827	26.7315	34.0504	0.250027	0.632536	NA	23.81	27.7882
1700113A16Rik	105.47	97.1459	115.88	107.781	106.926	107.158	0.0153188	0.955741	NA	106.165	107.288
1700119H24Rik	0.799017	0	2.20724	6.15892	0	3.00444	1.48587	0.484748	NA	1.00208	3.05445
1700120C14Rik	0	1.18471	3.31085	0	1.11381	1.00148	-0.654393	0.80657	NA	1.49852	0.705097
1700120E14Rik	6.39213	7.10823	15.4507	15.3973	7.79668	9.01333	0.227106	0.776424	NA	9.65034	10.7358
1700120K04Rik	8.78918	7.10823	8.82895	11.2914	2.22762	8.01185	-0.325081	0.748623	NA	8.24212	7.17694
1700123I01Rik	3.19607	1.18471	0	3.07946	1.11381	0	0.439791	0.837598	NA	1.46026	1.39776
1700123M08Rik	18.3774	15.4012	29.7977	15.3973	17.821	17.0252	-0.283436	0.628932	NA	21.1921	16.7478
1700123O20Rik	237.308	259.451	251.625	273.046	304.07	247.366	0.137096	0.465621	NA	249.461	274.827
1700125H03Rik	1.59803	0	2.20724	3.07946	2.22762	1.00148	0.853568	0.66201	NA	1.26842	2.10285
1700126H18Rik	0.799017	1.18471	1.10362	2.05297	0	2.00296	0.0216508	0.991839	NA	1.02911	1.35198
1810006J02Rik	1.59803	4.73882	0	2.05297	2.22762	1.00148	0.274046	0.903035	NA	2.11229	1.76069
1810009A15Rik	0.799017	0	0	1.02649	0	1.00148	0.79846	0.770121	NA	0.266339	0.675989
1810010D01Rik	0.799017	1.18471	1.10362	0	1.11381	2.00296	-0.0226597	0.992306	NA	1.02911	1.03892
1810010H24Rik	38.3528	31.987	43.0411	50.2979	31.1867	34.0504	0.0257124	0.954915	NA	37.7937	38.5116
1810011H11Rik	8.78918	18.9553	13.2434	8.2119	6.68287	9.01333	-0.774849	0.313936	NA	13.6626	7.96936
1810011O10Rik	1117.03	1593.43	929.247	1173.27	1302.05	1082.6	-0.0158242	0.917349	0.974351	1213.23	1185.97
1810012K16Rik	11.1862	8.29294	14.347	13.3443	20.0486	14.0207	0.488288	0.499134	NA	11.2754	15.8046
1810013A23Rik	2.39705	1.18471	0	5.13243	3.34143	2.00296	1.87821	0.283299	NA	1.19392	3.49228
1810013L24Rik	1030.73	1171.67	1623.42	1321.09	1089.31	1276.89	-0.0317217	0.818765	0.956911	1275.28	1229.09
1810014B01Rik	51.1371	56.8659	57.3881	82.119	104.698	48.0711	0.452074	0.212317	NA	55.1304	78.2961
1810019D21Rik	243.7	172.967	299.081	282.284	187.12	316.468	0.115224	0.601485	NA	238.583	261.957
1810021B22Rik	35.9557	33.1718	33.1085	21.5562	27.8453	26.0385	-0.444307	0.405644	NA	34.0787	25.1467
1810022K09Rik	277.259	342.38	311.22	392.118	432.159	330.489	0.305512	0.0944814	NA	310.286	384.922
1810024B03Rik	15.1813	9.47764	15.4507	16.4238	12.2519	13.0193	0.0482537	0.943713	NA	13.3699	13.8983
1810026B05Rik	340.381	274.852	475.659	500.926	543.54	408.604	0.438898	0.00703707	NA	363.631	484.357
1810026J23Rik	532.944	534.302	510.975	504.005	555.792	583.863	0.0578401	0.696291	NA	526.074	547.887
1810030O07Rik	449.047	398.061	568.363	482.449	449.98	424.628	-0.047241	0.763055	NA	471.824	452.352
1810032O08Rik	53.5341	42.6494	47.4556	76.9865	71.2839	67.0992	0.579012	0.100131	NA	47.8797	71.7899
1810034E14Rik	37.5538	27.2482	26.4868	28.7416	38.9834	29.0429	0.0733277	0.875829	NA	30.4296	32.256
1810037I17Rik	254.886	300.915	228.449	268.94	385.379	241.357	0.170598	0.418855	NA	261.417	298.558
1810041H14Rik	5.59312	9.47764	9.93256	16.4238	5.56906	9.01333	0.304867	0.718428	NA	8.33444	10.3354
1810041L15Rik	3.99508	5.92353	4.41447	0	4.45524	4.00592	-0.842231	0.596378	NA	4.77769	2.82039
1810043G02Rik	52.7351	91.2223	56.2845	82.119	89.1049	77.114	0.326779	0.331908	NA	66.7473	82.7793
1810043H04Rik	51.1371	59.2353	20.9687	29.7681	45.6663	31.0459	-0.212363	0.616271	NA	43.7804	35.4934
1810044D09Rik	31.1616	23.6941	28.6941	29.7681	22.2762	28.0415	-0.0773925	0.878099	NA	27.8499	26.6953
1810046K07Rik	3.19607	1.18471	3.31085	3.07946	3.34143	1.00148	-0.1884	0.913873	NA	2.56388	2.47413
1810055G02Rik	141.426	127.948	94.9112	112.914	134.771	142.21	0.118058	0.749691	NA	121.428	129.965
1810058I24Rik	135.034	100.7	110.362	86.2249	100.243	119.176	-0.186012	0.511163	NA	115.365	101.881
1810062G17Rik	63.9213	43.8341	55.1809	54.4038	52.3491	45.0666	-0.107337	0.780127	NA	54.3121	50.6065
1810062O18Rik	3.99508	1.18471	6.62171	4.10595	5.56906	2.00296	0.0306087	0.980158	NA	3.93383	3.89266
1810063I02Rik	3.19607	0	0	1.02649	0	2.00296	-0.327509	0.891145	NA	1.06536	1.00982
1810064F22Rik	13.5833	17.7706	33.1085	19.5033	25.6177	20.0296	0.111199	0.844038	NA	21.4875	21.7168
2010001A14Rik	27.9656	31.987	34.2122	26.6887	32.3005	31.0459	-0.0587427	0.899644	NA	31.3883	30.0117
2010003K11Rik	0	9.47764	0	3.07946	16.7072	1.00148	0.565672	0.753643	NA	3.15921	6.92937
2010009K17Rik	0.799017	2.36941	2.20724	6.15892	0	2.00296	0.383227	0.823496	NA	1.79189	2.72063
2010012O05Rik	94.284	98.3306	109.258	96.4898	103.584	79.117	-0.116741	0.678883	NA	100.624	93.0637
2010016I18Rik	71.9115	41.4647	92.7039	121.125	101.357	82.1214	0.601021	0.0528427	NA	68.6934	101.535
2010106C02Rik	0.799017	1.18471	1.10362	3.07946	1.11381	4.00592	1.27205	0.548567	NA	1.02911	2.73307
2010107E04Rik	752.674	1060.31	954.63	956.686	1318.75	822.216	0.135215	0.399763	0.828411	922.538	1032.55
2010107G12Rik	0.799017	0	1.10362	2.05297	1.11381	0	0.637386	0.786968	NA	0.634212	1.0556
2010107G23Rik	127.843	119.655	103.74	114.967	108.04	107.158	-0.0873046	0.731022	NA	117.079	110.055
2010109A12Rik	4.7941	5.92353	4.41447	7.18541	13.3657	4.00592	0.542908	0.589783	NA	5.04403	8.18569
2010109I03Rik	6.39213	1.18471	7.72533	7.18541	10.0243	5.0074	0.569239	0.593304	NA	5.10072	7.4057
2010111I01Rik	1661.16	1636.08	2208.34	2508.73	1981.47	2659.93	0.377658	0.00108957	0.0882062	1835.19	2383.38
2010204K13Rik	3.99508	1.18471	5.51809	4.10595	5.56906	5.0074	0.444892	0.746287	NA	3.56596	4.89414
2010300C02Rik	857.345	856.542	784.673	824.269	532.402	918.358	-0.174824	0.201518	0.695388	832.853	758.343
2010310C07Rik	3.19607	2.36941	8.82895	7.18541	4.45524	4.00592	0.367765	0.74297	NA	4.79814	5.21553
2010315B03Rik	655.993	669.359	883.998	725.726	895.504	627.929	0.0277507	0.83648	NA	736.45	749.72
2010320M18Rik	88.6908	75.8212	61.8026	51.3243	56.8044	60.0889	-0.419945	0.209598	NA	75.4382	56.0725
2200002D01Rik	9.5882	8.29294	5.51809	7.18541	6.68287	3.00444	-0.510622	0.587294	NA	7.79974	5.62424
2200002J24Rik	3.99508	9.47764	1.10362	1.02649	0	1.00148	-2.61383	0.14407	NA	4.85878	0.675989
2210011C24Rik	1.59803	3.55412	1.10362	2.05297	1.11381	1.00148	-0.720135	0.69011	NA	2.08526	1.38942
2210013O21Rik	75.9066	81.7447	78.3569	86.2249	100.243	92.1362	0.239847	0.425026	NA	78.6694	92.8681
2210015D19Rik	98.279	131.502	109.258	113.94	124.747	119.176	0.0819066	0.763242	NA	113.013	119.288
2210016F16Rik	454.64	530.748	451.38	383.906	357.533	402.595	-0.329019	0.0593371	NA	478.923	381.345
2210016L21Rik	251.69	267.743	208.584	233.013	210.51	215.318	-0.137019	0.467734	NA	242.673	219.614
2210018M11Rik	389.121	399.246	536.358	445.495	346.395	429.635	-0.10826	0.4891	NA	441.575	407.175
2210039B01Rik	4.7941	5.92353	8.82895	8.2119	2.22762	4.00592	-0.431174	0.683793	NA	6.51552	4.81515
2210404O09Rik	47.142	28.4329	38.6266	46.1919	66.8287	31.0459	0.267494	0.53224	NA	38.0672	48.0222
2210406O10Rik	23.1715	18.9553	23.176	21.5562	16.7072	21.0311	-0.15908	0.793246	NA	21.7676	19.7648
2210407C18Rik	7.99017	9.47764	18.7615	7.18541	14.4795	13.0193	0.0428456	0.955875	NA	12.0764	11.5614
2210408F21Rik	116.656	150.458	124.709	119.072	153.706	116.172	-0.0153246	0.956235	NA	130.608	129.65
2210408I21Rik	109.465	107.808	165.543	122.152	129.202	116.172	-0.0300328	0.903497	NA	127.605	122.509
2210409D07Rik	76.7056	87.6682	120.294	114.967	71.2839	62.0918	-0.170405	0.694499	NA	94.8894	82.7808
2210416O15Rik	5.59312	4.73882	15.4507	11.2914	8.91049	6.00889	0.228858	0.800435	NA	8.5942	8.73691
2210417A02Rik	0.799017	3.55412	5.51809	2.05297	2.22762	2.00296	-0.489683	0.772703	NA	3.29041	2.09452
2300009A05Rik	75.1076	72.267	76.1497	68.7746	77.9668	66.0977	-0.073334	0.80986	NA	74.5081	70.9464
2310001H17Rik	460.234	407.539	545.187	453.707	503.443	412.61	-0.0398849	0.829095	NA	470.987	456.587
2310002L09Rik	24.7695	18.9553	20.9687	20.5297	26.7315	13.0193	-0.152762	0.774242	NA	21.5645	20.0935
2310008N11Rik	0.799017	7.10823	2.20724	5.13243	6.68287	0	-0.241638	0.874583	NA	3.3715	3.93843
2310009A05Rik	129.441	120.84	101.533	120.099	120.292	100.148	-0.0446344	0.86144	NA	117.271	113.513
2310009B15Rik	30.3626	35.5412	23.176	21.5562	31.1867	25.037	-0.18514	0.709534	NA	29.6933	25.9267
2310010G23Rik	6.39213	7.10823	9.93256	7.18541	6.68287	6.00889	-0.207049	0.814464	NA	7.81098	6.62572
2310010J17Rik	44.7449	43.8341	48.5592	43.1125	66.8287	46.0681	0.171313	0.672483	NA	45.7127	52.0031
2310011J03Rik	206.945	202.585	114.776	178.609	217.193	174.258	0.155336	0.485592	NA	174.769	190.02
2310015A10Rik	173.387	107.808	184.304	183.741	136.999	159.235	0.046574	0.853992	NA	155.166	159.992
2310022A10Rik	56.7302	61.6047	51.8701	41.0595	41.211	49.0726	-0.37539	0.304224	NA	56.735	43.781
2310022B05Rik	147.818	127.948	178.786	142.682	148.137	173.256	0.0367708	0.893474	NA	151.517	154.692
2310030G06Rik	245.298	362.52	303.495	268.94	295.16	280.415	-0.106489	0.592056	NA	303.771	281.505
2310033P09Rik	83.8967	79.3753	71.7352	89.3044	74.6253	96.1422	0.136117	0.636812	NA	78.3357	86.6906
2310034G01Rik	10.3872	11.8471	11.0362	12.3178	4.45524	12.0178	-0.313575	0.688588	NA	11.0902	9.59695
2310035C23Rik	630.424	664.62	934.765	819.137	794.147	782.157	0.127023	0.369991	0.803022	743.27	798.48
2310036O22Rik	453.841	530.748	425.997	436.257	366.444	465.689	-0.159118	0.325696	NA	470.195	422.796
2310039H08Rik	98.279	81.7447	93.8075	91.3573	87.9911	97.1437	0.0133696	0.965023	NA	91.2771	92.164
2310040G24Rik	39.9508	36.7259	37.523	27.7151	31.1867	29.0429	-0.377608	0.38695	NA	38.0666	29.3149
2310043O21Rik	2.39705	4.73882	6.62171	10.2649	5.56906	9.01333	0.894518	0.347222	NA	4.58586	8.28242
2310045N01Rik	201.352	189.553	168.854	182.715	164.844	196.29	-0.0457475	0.824678	NA	186.586	181.283
2310047M10Rik	109.465	110.178	86.0822	96.4898	87.9911	119.176	-0.0166024	0.950645	NA	101.908	101.219
2310057J18Rik	305545	354971	342620	369110	313291	335889	0.0209342	0.845852	0.963004	334379	339430
2310057M21Rik	87.8918	90.0376	61.8026	96.4898	72.3977	74.1096	0.0285244	0.929147	NA	79.9107	80.999
2310061I04Rik	61.5243	65.1588	60.699	70.8276	54.5767	59.0874	-0.0227503	0.945618	NA	62.4607	61.4972
2310067B10Rik	741.487	710.823	506.561	560.462	426.59	697.031	-0.235192	0.0987713	NA	652.957	561.361
2310068J16Rik	2.39705	0	2.20724	4.10595	4.45524	4.00592	1.48202	0.399965	NA	1.53476	4.18904
2310069B03Rik	36.7548	36.7259	50.7664	40.033	47.8939	40.0592	0.0490842	0.907163	NA	41.4157	42.662
2310069G16Rik	27.1666	15.4012	13.2434	22.5827	18.9348	24.0355	0.23155	0.685747	NA	18.6037	21.851
2400006E01Rik	10.3872	11.8471	7.72533	16.4238	2.22762	5.0074	-0.38362	0.675374	NA	9.98653	7.88627
2410002F23Rik	3948.74	2964.13	3934.4	4004.33	3895	4295.35	0.167548	0.215323	0.709387	3615.76	4064.89
2410004B18Rik	117.455	149.273	120.294	118.046	153.706	109.161	-0.0321979	0.898312	NA	129.008	126.971
2410006H16Rik	107.068	73.4517	69.5279	103.675	141.454	103.153	0.470616	0.115627	NA	83.3493	116.094
2410015M20Rik	664.782	907.484	552.913	573.806	866.545	530.785	-0.12213	0.45739	NA	708.393	657.045
2410016O06Rik	126.245	136.241	103.74	128.311	104.698	115.17	-0.0661198	0.792213	NA	122.075	116.06
2410089E03Rik	293.239	253.527	359.78	360.297	354.192	329.487	0.214519	0.230791	NA	302.182	347.992
2410127L17Rik	98.279	104.254	113.673	113.94	109.153	90.1333	-0.0119932	0.965059	NA	105.402	104.409
2410131K14Rik	177.382	207.323	98.222	129.337	121.405	190.281	-0.110904	0.676156	NA	160.976	147.008
2500002B13Rik	7.19115	7.10823	19.8651	20.5297	21.1624	25.037	1.11968	0.076483	NA	11.3882	22.2431
2500004C02Rik	31.1616	33.1718	43.0411	32.8476	36.7558	32.0474	-0.0624437	0.889559	NA	35.7915	33.8836
2510002D24Rik	163.798	199.031	176.579	181.688	202.714	205.304	0.131224	0.541161	NA	179.803	196.568
2510003B16Rik	4.7941	2.36941	7.72533	7.18541	6.68287	4.00592	0.353117	0.758405	NA	4.96295	5.95807
2510009E07Rik	211.739	188.368	211.895	175.529	208.283	185.274	-0.106043	0.60398	NA	204.001	189.695
2510039O18Rik	616.042	630.263	445.862	425.992	431.045	521.772	-0.286916	0.070814	NA	564.056	459.603
2610001J05Rik	152.612	194.292	155.61	192.98	204.941	171.253	0.179686	0.422309	NA	167.505	189.725
2610002M06Rik	423.479	419.386	467.934	441.389	475.597	398.589	0.00563406	0.97083	NA	436.933	438.525
2610005L07Rik	56.7302	37.9106	56.2845	65.6952	52.3491	75.1111	0.332967	0.348699	NA	50.3084	64.3851
2610008E11Rik	303.626	273.667	450.276	415.727	405.427	320.474	0.180523	0.293902	NA	342.523	380.543
2610015P09Rik	125.446	122.025	156.714	172.45	124.747	152.225	0.152225	0.528394	NA	134.728	149.807
2610016A17Rik	7.99017	7.10823	19.8651	15.3973	8.91049	8.01185	0.0252668	0.973553	NA	11.6545	10.7732
2610020C07Rik	19.1764	17.7706	24.2796	30.7946	27.8453	32.0474	0.569414	0.282962	NA	20.4089	30.2291
2610020H08Rik	51.9361	47.3882	64.0099	63.6422	74.6253	40.0592	0.102201	0.780391	NA	54.4447	59.4423
2610027K06Rik	4.7941	4.73882	6.62171	10.2649	3.34143	9.01333	0.387189	0.685009	NA	5.38488	7.53988
2610028H24Rik	0.799017	1.18471	1.10362	2.05297	1.11381	1.00148	0.397767	0.86135	NA	1.02911	1.38942
2610035D17Rik	206.146	228.648	224.034	210.43	227.217	244.361	0.0491247	0.803497	NA	219.61	227.336
2610037D02Rik	5.59312	1.18471	4.41447	7.18541	4.45524	7.01037	0.711028	0.597913	NA	3.73076	6.21701
2610044O15Rik8	105.47	111.362	144.574	91.3573	160.389	102.151	-0.0402842	0.880377	NA	120.469	117.966
2610203C22Rik	19.1764	24.8788	17.6579	19.5033	14.4795	16.0237	-0.31028	0.60971	NA	20.571	16.6688
2610206C17Rik	0.799017	0	1.10362	3.07946	2.22762	6.00889	2.48053	0.196481	NA	0.634212	3.77199
2610301B20Rik	151.813	215.616	147.885	165.264	157.047	160.237	-0.0878429	0.720757	NA	171.771	160.85
2610305D13Rik	205.347	92.407	260.454	168.344	328.574	225.333	0.472633	0.674841	NA	186.069	240.75
2610306M01Rik	26.3675	37.9106	29.7977	17.4503	28.9591	22.0326	-0.46555	0.354816	NA	31.3586	22.814
2610307P16Rik	45.5439	34.3565	71.7352	37.98	44.5524	55.0815	-0.0926753	0.811961	NA	50.5452	45.8713
2610318N02Rik	4.7941	2.36941	3.31085	2.05297	2.22762	1.00148	-1.04234	0.453935	NA	3.49146	1.76069
2610507B11Rik	6407.31	7263.43	7087.44	6145.58	5151.38	7188.63	-0.181149	0.116827	0.597145	6919.39	6161.86
2610507I01Rik	237.308	229.833	335.5	275.099	288.477	272.403	0.0804183	0.669127	NA	267.547	278.659
2610524H06Rik	36.7548	20.14	26.4868	36.9535	37.8696	18.0267	0.109913	0.819236	NA	27.7939	30.9499
2610528A11Rik	3.99508	0	0	2.05297	6.68287	0	0.868049	0.733128	NA	1.33169	2.91195
2610528J11Rik	242.901	329.348	291.355	252.516	263.973	249.369	-0.169634	0.369658	NA	287.868	255.286
2700029M09Rik	186.171	202.585	167.75	180.662	212.738	151.224	-0.0404226	0.86906	NA	185.502	181.541
2700038G22Rik	17.5784	17.7706	16.5543	28.7416	18.9348	21.0311	0.377939	0.537789	NA	17.3011	22.9025
2700046A07Rik	1.59803	0	4.41447	6.15892	2.22762	3.00444	1.17949	0.421892	NA	2.00417	3.797
2700046G09Rik	25.5685	26.0635	32.0049	34.9006	37.8696	35.0518	0.376835	0.406397	NA	27.879	35.9407
2700049A03Rik	239.705	209.693	267.076	245.33	228.331	253.375	0.0214242	0.910854	NA	238.824	242.345
2700054A10Rik	22.3725	14.2165	25.3832	27.7151	17.821	24.0355	0.161281	0.772175	NA	20.6574	23.1906
2700060E02Rik	850.154	858.912	965.666	842.746	1124.95	791.17	0.0344597	0.790436	0.95087	891.577	919.622
2700062C07Rik	109.465	127.948	128.02	111.887	106.926	118.175	-0.114659	0.647874	NA	121.811	112.329
2700070H01Rik	0.799017	2.36941	2.20724	0	2.22762	1.00148	-0.944604	0.706483	NA	1.79189	1.07637
2700081O15Rik	71.1125	87.6682	104.844	88.2779	80.1944	103.153	0.0499921	0.862602	NA	87.8748	90.5416
2700094K13Rik	97.48	92.407	75.046	68.7746	120.292	95.1407	0.098082	0.749497	NA	88.311	94.7356
2700097O09Rik	48.74	78.1906	81.6677	78.013	85.7635	58.0859	0.0915157	0.784587	NA	69.5328	73.9541
2700099C18Rik	3.19607	2.36941	8.82895	2.05297	11.1381	9.01333	0.797445	0.457363	NA	4.79814	7.40147
2810001G20Rik	67.9164	61.6047	102.636	89.3044	112.495	92.1362	0.369405	0.203526	NA	77.3859	97.9785
2810002D19Rik	48.74	36.7259	32.0049	55.4303	41.211	50.074	0.310469	0.449089	NA	39.1569	48.9051
2810004N23Rik	223.725	217.986	211.895	200.165	187.12	238.352	-0.0719768	0.715112	NA	217.868	208.546
2810006K23Rik	74.3085	74.6364	60.699	60.5627	77.9668	44.0652	-0.229135	0.48599	NA	69.8813	60.8649
2810013P06Rik	138.23	142.165	125.812	157.053	199.372	117.173	0.194405	0.419103	NA	135.402	157.866
2810021J22Rik	89.4899	71.0823	83.875	95.4633	103.584	78.1155	0.17379	0.539641	NA	81.4824	92.3877
2810025M15Rik	44.7449	41.4647	51.8701	46.1919	44.5524	36.0533	-0.120592	0.759253	NA	46.0266	42.2659
2810029C07Rik	7.99017	4.73882	6.62171	8.2119	6.68287	11.0163	0.375515	0.666555	NA	6.45023	8.63702
2810032G03Rik	6.39213	4.73882	5.51809	3.07946	5.56906	6.00889	-0.192534	0.855674	NA	5.54968	4.8858
2810047C21Rik1	8.78918	4.73882	7.72533	9.23838	10.0243	3.00444	-0.0311904	0.974269	NA	7.08444	7.42238
2810403A07Rik	903.688	806.784	1152.18	1080.89	883.252	1163.72	0.131554	0.298117	0.760912	954.217	1042.62
2810403D21Rik	23.9705	18.9553	46.352	44.1389	51.2353	31.0459	0.550883	0.274694	NA	29.7593	42.1401
2810405F15Rik	6.39213	9.47764	11.0362	9.23838	8.91049	8.01185	-0.026379	0.972851	NA	8.96865	8.72024
2810408A11Rik	6.39213	5.92353	11.0362	12.3178	13.3657	4.00592	0.286149	0.742694	NA	7.78395	9.8965
2810408I11Rik	0.799017	1.18471	1.10362	2.05297	0	0	-0.60179	0.813951	NA	1.02911	0.684325
2810410L24Rik	23.9705	17.7706	18.7615	33.8741	25.6177	36.0533	0.636896	0.203957	NA	20.1675	31.8483
2810417H13Rik	56.7302	11.8471	12.1398	40.033	75.7392	15.0222	0.618235	0.303308	NA	26.9057	43.5981
2810428I15Rik	100.676	100.7	45.2483	53.3773	47.8939	76.1126	-0.420537	0.191358	NA	82.2081	59.1279
2810433D01Rik	7.99017	10.6623	7.72533	3.07946	13.3657	19.0281	0.415713	0.645811	NA	8.79261	11.8244
2810442N19Rik	7.99017	1.18471	13.2434	12.3178	4.45524	7.01037	0.250329	0.798623	NA	7.47276	7.92782
2810454H06Rik	23.9705	24.8788	27.5905	21.5562	27.8453	22.0326	-0.0988543	0.845882	NA	25.4799	23.8114
2810459M11Rik	102.274	55.6812	98.222	51.3243	74.6253	70.1037	-0.358487	0.424304	NA	85.3924	65.3511
2810468N07Rik	7.19115	9.47764	5.51809	7.18541	5.56906	8.01185	-0.085822	0.926916	NA	7.39563	6.9221
2810474O19Rik	1549.29	1746.26	1602.45	1590.03	1463.55	1230.82	-0.19934	0.280249	0.753795	1632.67	1428.13
2900005J15Rik	21.5734	9.47764	43.0411	42.086	26.7315	40.0592	0.679589	0.165409	NA	24.6974	36.2922
2900008C10Rik	6.39213	5.92353	1.10362	1.02649	8.91049	2.00296	-0.145135	0.921896	NA	4.47309	3.97998
2900009J06Rik	0.799017	2.36941	0	2.05297	1.11381	1.00148	0.774347	0.747967	NA	1.05614	1.38942
2900011O08Rik	3.19607	2.36941	2.20724	4.10595	2.22762	1.00148	-0.0875545	0.959676	NA	2.5909	2.44502
2900026A02Rik	275.661	283.145	360.883	284.337	182.665	266.394	-0.337412	0.0705313	NA	306.563	244.465
2900041M22Rik	2.39705	0	1.10362	3.07946	3.34143	1.00148	0.981866	0.614057	NA	1.16689	2.47413
2900052N01Rik	12.7843	5.92353	0	7.18541	17.821	4.00592	0.742893	0.571281	NA	6.23593	9.67077
2900057B20Rik	10.3872	5.92353	24.2796	11.2914	4.45524	20.0296	-0.239228	0.747244	NA	13.5301	11.9254
2900060B14Rik	7.19115	10.6623	3.31085	17.4503	18.9348	9.01333	1.19889	0.131167	NA	7.05478	15.1328
2900076A07Rik	56.7302	59.2353	75.046	96.4898	101.357	82.1214	0.56286	0.0643977	NA	63.6705	93.3227
2900097C17Rik	2425.81	2545.93	2763.46	2276.75	1941.37	2687.97	-0.17552	0.0997738	0.574156	2578.4	2302.03
3000002C10Rik	35.1567	33.1718	30.9013	43.1125	33.4143	36.0533	0.1786	0.687956	NA	33.0766	37.5267
3010026O09Rik	33.5587	17.7706	24.2796	22.5827	31.1867	29.0429	0.122708	0.814698	NA	25.203	27.6041
3110001I22Rik	44.7449	72.267	52.9737	83.1454	86.8773	67.0992	0.480071	0.180242	NA	56.6619	79.0406
3110002H16Rik	297.234	315.132	306.806	311.026	328.574	351.52	0.108304	0.520967	NA	306.391	330.373
3110009E18Rik	15.9803	15.4012	15.4507	11.2914	13.3657	11.0163	-0.395943	0.554688	NA	15.6107	11.8911
3110021A11Rik	0	3.55412	5.51809	7.18541	1.11381	2.00296	0.394792	0.799405	NA	3.02407	3.43406
3110021N24Rik	100.676	78.1906	79.4605	78.013	87.9911	112.166	0.0905606	0.792896	NA	86.1091	92.7233
3110035E14Rik	10.3872	2.36941	4.41447	4.10595	2.22762	5.0074	-0.672848	0.549861	NA	5.7237	3.78033
3110039I08Rik	58.3282	69.8976	91.6003	80.066	65.7149	81.12	0.0650438	0.829366	NA	73.2754	75.6336
3110040N11Rik	127.843	140.98	130.227	122.152	149.251	126.187	-0.006844	0.978608	NA	133.017	132.53
3110043O21Rik	283.651	240.495	317.842	297.681	316.322	299.443	0.124834	0.495084	NA	280.663	304.482
3110045C21Rik	3.99508	2.36941	1.10362	4.10595	5.56906	3.00444	0.805028	0.538907	NA	2.48937	4.22648
3110052M02Rik	173.387	189.553	200.859	196.059	265.087	212.314	0.25446	0.221397	NA	187.933	224.487
3110056K07Rik	118.254	100.7	118.087	152.947	161.503	134.198	0.410019	0.0892843	NA	112.347	149.549
3110057O12Rik	83.8967	90.0376	122.502	131.39	122.519	105.156	0.298228	0.273567	NA	98.812	119.688
3110062M04Rik	19.9754	16.5859	18.7615	23.6092	32.3005	24.0355	0.519549	0.33382	NA	18.4409	26.6484
3110070M22Rik	2.39705	1.18471	6.62171	6.15892	1.11381	7.01037	0.386004	0.783423	NA	3.40115	4.76103
3110079O15Rik	0	0	1.10362	0	3.34143	3.00444	2.74723	0.321133	NA	0.367873	2.11529
3110082I17Rik	43.9459	39.0953	23.176	31.8211	36.7558	28.0415	-0.110137	0.823605	NA	35.4057	32.2061
3110099E03Rik	50.338	39.0953	75.046	166.291	125.861	60.0889	1.05224	0.0302963	NA	54.8265	117.413
3200001D21Rik	11.9852	3.55412	8.82895	13.3443	20.0486	9.01333	0.732978	0.358822	NA	8.12277	14.1354
3300002I08Rik	22.3725	14.2165	15.4507	18.4768	20.0486	16.0237	0.0652435	0.916485	NA	17.3465	18.183
3300005D01Rik	0.799017	0	1.10362	3.07946	4.45524	0	1.4466	0.589105	NA	0.634212	2.51157
3632451O06Rik	27.1666	39.0953	30.9013	20.5297	21.1624	30.0444	-0.444024	0.449785	NA	32.3877	23.9122
3632454L22Rik	4.7941	7.10823	4.41447	13.3443	15.5934	6.00889	1.0251	0.25407	NA	5.43894	11.6489
3830403N18Rik	1.59803	0	0	12.3178	1.11381	0	3.37976	0.154836	NA	0.532678	4.47722
3830406C13Rik	340.381	341.195	499.939	436.257	441.069	400.592	0.137783	0.429105	NA	393.838	425.973
3830408C21Rik	2.39705	2.36941	6.62171	5.13243	4.45524	3.00444	0.268022	0.838753	NA	3.79606	4.19737
3830432H09Rik	1.59803	3.55412	3.31085	7.18541	2.22762	2.00296	0.459933	0.728601	NA	2.821	3.80533
3930402G23Rik	0	1.18471	1.10362	0	2.22762	4.00592	1.64504	0.452268	NA	0.762775	2.07785
4430402I18Rik	4.7941	5.92353	4.41447	8.2119	12.2519	6.00889	0.734012	0.446844	NA	5.04403	8.82423
4631405J19Rik	66.3184	69.8976	177.683	99.5692	49.0077	87.1288	-0.313888	0.342407	NA	104.633	78.5686
4632404H12Rik	62.3233	73.4517	66.2171	83.1454	112.495	107.158	0.58621	0.0537256	NA	67.3307	100.933
4632415L05Rik	94.284	90.0376	90.4967	93.4103	124.747	114.169	0.272597	0.311573	NA	91.6061	110.775
4632427E13Rik	39.9508	33.1718	46.352	62.6157	71.2839	76.1126	0.819439	0.0245426	NA	39.8249	70.0041
4632428C04Rik	9.5882	5.92353	3.31085	5.13243	10.0243	10.0148	0.512412	0.596257	NA	6.27419	8.39052
4632428N05Rik	386.724	305.654	258.247	304.867	396.517	276.409	0.0378117	0.83623	NA	316.875	325.931
4732416N19Rik	5.59312	0	1.10362	2.05297	0	0	-1.40346	0.570053	NA	2.23224	0.684325
4732471J01Rik	42.3479	42.6494	64.0099	55.4303	52.3491	47.0696	0.0866635	0.808342	NA	49.669	51.6163
4732490B19Rik	12.7843	10.6623	15.4507	14.3708	11.1381	13.0193	-0.0131659	0.984358	NA	12.9658	12.8427
4732491K20Rik	31.1616	31.987	38.6266	54.4038	47.8939	34.0504	0.423328	0.299686	NA	33.9251	45.4493
4831440E17Rik	80.7007	80.56	155.61	150.894	163.73	114.169	0.483366	0.100479	NA	105.624	142.931
4833411C07Rik	2.39705	2.36941	3.31085	0	2.22762	4.00592	-0.445512	0.785042	NA	2.69244	2.07785
4833417C18Rik	7.19115	0	9.93256	6.15892	11.1381	3.00444	0.255931	0.82987	NA	5.7079	6.76716
4833418N02Rik	69.5144	41.4647	77.2533	71.8541	36.7558	68.1007	-0.135303	0.711304	NA	62.7441	58.9035
4833419F23Rik	20.7744	17.7706	16.5543	18.4768	15.5934	11.0163	-0.296772	0.618061	NA	18.3664	15.0288
4833420G17Rik	453.841	394.507	622.441	584.071	492.305	568.841	0.179093	0.264914	NA	490.263	548.406
4833422C13Rik	7.19115	7.10823	8.82895	11.2914	6.68287	9.01333	0.216598	0.796302	NA	7.70944	8.99585
4833422M21Rik	3.19607	2.36941	4.41447	9.23838	5.56906	2.00296	0.739556	0.535541	NA	3.32665	5.60347
4833423E24Rik	307.621	194.292	813.367	289.469	229.445	241.357	-0.527782	0.449435	NA	438.427	253.424
4833439L19Rik	5251.14	5982.76	4352.67	5086.24	4148.95	5312.86	-0.0994938	0.596326	0.90348	5195.52	4849.35
4921504A21Rik	0	1.18471	1.10362	5.13243	2.22762	3.00444	2.30216	0.193126	NA	0.762775	3.45483
4921506M07Rik	13.5833	7.10823	25.3832	27.7151	20.0486	23.0341	0.730358	0.256552	NA	15.3582	23.5993
4921507L20Rik	7.19115	4.73882	17.6579	12.3178	8.91049	13.0193	0.3612	0.641619	NA	9.86262	11.4159
4921507P07Rik	7.99017	4.73882	20.9687	15.3973	11.1381	13.0193	0.454906	0.544217	NA	11.2326	13.1849
4921511C10Rik	4.7941	2.36941	6.62171	23.6092	10.0243	10.0148	1.68626	0.0583552	NA	4.59507	14.5494
4921511I17Rik	3.99508	1.18471	4.41447	4.10595	6.68287	4.00592	0.54312	0.683412	NA	3.19809	4.93158
4921513I03Rik	1.59803	1.18471	1.10362	3.07946	2.22762	2.00296	0.909584	0.583119	NA	1.29545	2.43668
4921518K17Rik	3.99508	1.18471	18.7615	4.10595	3.34143	7.01037	-0.180743	0.875714	NA	7.98043	4.81925
4921524J17Rik	116.656	120.84	150.092	117.02	145.909	119.176	-0.0161432	0.947644	NA	129.196	127.368
4921525O09Rik	0.799017	0	0	5.13243	8.91049	0	3.0267	0.26426	NA	0.266339	4.68097
4921531C22Rik	73.5095	78.1906	97.1184	97.5163	70.1701	65.0963	-0.0840944	0.785445	NA	82.9395	77.5942
4921536K21Rik	2.39705	4.73882	3.31085	0	6.68287	2.00296	-0.604405	0.676069	NA	3.48224	2.89528
4930402H24Rik	732.698	681.206	978.909	745.23	779.668	886.311	0.025003	0.862084	0.964985	797.604	803.736
4930404I05Rik	18.3774	26.0635	44.1447	49.2714	32.3005	58.0859	0.6932	0.114546	NA	29.5285	46.5526
4930404N11Rik	22.3725	28.4329	9.93256	26.6887	24.5038	21.0311	0.382659	0.484814	NA	20.246	24.0745
4930405A10Rik	6.39213	1.18471	1.10362	3.07946	1.11381	1.00148	-0.666709	0.696385	NA	2.89349	1.73158
4930405A21Rik	6.39213	7.10823	2.20724	8.2119	7.79668	10.0148	0.822009	0.397245	NA	5.23587	8.67446
4930405J17Rik	12.7843	14.2165	22.0724	24.6357	12.2519	24.0355	0.295874	0.617976	NA	16.3577	20.3077
4930405O22Rik	14.3823	7.10823	23.176	20.5297	18.9348	16.0237	0.383796	0.542217	NA	14.8888	18.4961
4930412C18Rik	14.3823	16.5859	22.0724	19.5033	22.2762	24.0355	0.335111	0.581152	NA	17.6802	21.9383
4930413F20Rik	19.1764	14.2165	22.0724	21.5562	20.0486	30.0444	0.349811	0.544748	NA	18.4884	23.8831
4930413G21Rik	0.799017	1.18471	3.31085	3.07946	0	1.00148	-0.365885	0.863073	NA	1.76486	1.36031
4930414N06Rik	3.99508	5.92353	9.93256	7.18541	8.91049	6.00889	0.226656	0.825533	NA	6.61706	7.36826
4930415F15Rik	0.799017	2.36941	4.41447	7.18541	2.22762	4.00592	1.01087	0.479934	NA	2.52763	4.47299
4930415O20Rik	19.1764	22.5094	18.7615	19.5033	15.5934	20.0296	-0.138156	0.807746	NA	20.1491	18.3754
4930426D05Rik	1.59803	0	2.20724	7.18541	6.68287	0	1.67667	0.463567	NA	1.26842	4.62276
4930426L09Rik	0.799017	1.18471	0	3.07946	1.11381	1.00148	1.53202	0.5015	NA	0.661241	1.73158
4930427A07Rik	65.5194	54.4965	64.0099	57.4833	55.6906	60.0889	-0.0884581	0.804707	NA	61.3419	57.7542
4930429B21Rik	2.39705	2.36941	2.20724	6.15892	3.34143	4.00592	0.948409	0.48547	NA	2.32457	4.50209
4930429F24Rik	7.99017	13.0318	5.51809	13.3443	14.4795	10.0148	0.540822	0.500051	NA	8.84667	12.6129
4930430F08Rik	41.5489	50.9423	61.8026	40.033	49.0077	44.0652	-0.19905	0.598763	NA	51.4313	44.3686
4930431P03Rik	0	0	1.10362	4.10595	3.34143	1.00148	2.89673	0.196043	NA	0.367873	2.81629
4930432K21Rik	8.78918	1.18471	7.72533	14.3708	6.68287	5.0074	0.568445	0.566584	NA	5.89974	8.68703
4930438E09Rik	0	0	2.20724	1.02649	4.45524	2.00296	2.38539	0.287035	NA	0.735745	2.4949
4930443O20Rik	10.3872	5.92353	9.93256	9.23838	12.2519	12.0178	0.340323	0.673316	NA	8.74777	11.1694
4930444F02Rik	0.799017	1.18471	4.41447	4.10595	2.22762	5.0074	1.1297	0.413085	NA	2.13273	3.78033
4930445N18Rik	0	2.36941	2.20724	3.07946	3.34143	4.00592	1.3399	0.425154	NA	1.52555	3.47561
4930447A16Rik	11.1862	9.47764	25.3832	33.8741	14.4795	12.0178	0.49891	0.431527	NA	15.349	20.1238
4930447C04Rik	3.99508	2.36941	2.20724	2.05297	6.68287	3.00444	0.342184	0.798144	NA	2.85724	3.91343
4930447M23Rik	0	0	1.10362	1.02649	1.11381	3.00444	2.10487	0.435955	NA	0.367873	1.71491
4930448I18Rik	0.799017	0	3.31085	0	1.11381	1.00148	-0.69454	0.793647	NA	1.36996	0.705097
4930449E18Rik	1.59803	1.18471	4.41447	3.07946	3.34143	0	-0.30129	0.856716	NA	2.39907	2.1403
4930451G09Rik	23.1715	23.6941	25.3832	35.927	18.9348	32.0474	0.231829	0.637144	NA	24.0829	28.9697
4930452B06Rik	85.4948	55.6812	102.636	61.5892	70.1701	74.1096	-0.204538	0.666561	NA	81.2708	68.623
4930453N24Rik	465.827	535.487	555.12	518.376	631.531	521.772	0.102764	0.506165	NA	518.811	557.226
4930455C13Rik	5.59312	3.55412	11.0362	13.3443	18.9348	6.00889	0.934325	0.268966	NA	6.72781	12.7627
4930455G09Rik	6.39213	5.92353	7.72533	4.10595	6.68287	0	-1.43187	0.258298	NA	6.68033	3.59627
4930455H04Rik	3.99508	4.73882	6.62171	8.2119	3.34143	9.01333	0.338185	0.74435	NA	5.11854	6.85555
4930471G03Rik	3.19607	1.18471	1.10362	1.02649	2.22762	1.00148	-0.368526	0.848496	NA	1.82813	1.41853
4930473A02Rik	14.3823	10.6623	7.72533	10.2649	12.2519	7.01037	-0.150003	0.853441	NA	10.9233	9.84239
4930474G06Rik	0.799017	2.36941	1.10362	2.05297	5.56906	1.00148	0.721414	0.67936	NA	1.42402	2.8745
4930474M22Rik	4.7941	0	4.41447	7.18541	0	3.00444	-0.143384	0.930405	NA	3.06952	3.39662
4930478L05Rik	3.19607	0	2.20724	3.07946	13.3657	2.00296	1.32605	0.329064	NA	1.8011	6.14939
4930479D17Rik	1.59803	3.55412	3.31085	2.05297	2.22762	3.00444	-0.197393	0.898689	NA	2.821	2.42835
4930480K23Rik	60.7253	39.0953	66.2171	70.8276	62.3734	53.0785	0.173411	0.631158	NA	55.3459	62.0932
4930481A15Rik	59.1272	86.4835	97.1184	71.8541	77.9668	79.117	-0.0629903	0.851927	NA	80.9097	76.3126
4930482G09Rik	1.59803	2.36941	3.31085	5.13243	1.11381	1.00148	0.0251452	0.987286	NA	2.4261	2.41591
4930483J18Rik	0.799017	0	1.10362	0	3.34143	3.00444	1.72292	0.49099	NA	0.634212	2.11529
4930483K19Rik	3.19607	1.18471	1.10362	3.07946	4.45524	7.01037	1.42823	0.312899	NA	1.82813	4.84836
4930483O08Rik	0.799017	0	3.31085	2.05297	1.11381	0	0.126537	0.961399	NA	1.36996	1.0556
4930486L24Rik	9.5882	5.92353	3.31085	6.15892	3.34143	6.00889	-0.278748	0.794042	NA	6.27419	5.16975
4930487H11Rik	3.19607	0	2.20724	3.07946	10.0243	4.00592	1.56696	0.302555	NA	1.8011	5.70323
4930488L21Rik	0	0	2.20724	1.02649	1.11381	5.0074	2.07676	0.327816	NA	0.735745	2.38257
4930502E09Rik	3.19607	5.92353	6.62171	6.15892	5.56906	6.00889	0.210728	0.848545	NA	5.2471	5.91229
4930503B20Rik	3.99508	3.55412	6.62171	3.07946	4.45524	4.00592	-0.230131	0.853438	NA	4.72364	3.84688
4930503L19Rik	27.1666	22.5094	26.4868	40.033	55.6906	20.0296	0.498394	0.328692	NA	25.3876	38.5844
4930506C21Rik	20.7744	13.0318	26.4868	33.8741	26.7315	28.0415	0.579322	0.289645	NA	20.0977	29.549
4930507D05Rik	1.59803	5.92353	6.62171	7.18541	13.3657	4.00592	0.688981	0.515391	NA	4.71442	8.18569
4930509E16Rik	2.39705	1.18471	3.31085	4.10595	4.45524	3.00444	0.802082	0.583147	NA	2.29754	3.85521
4930511A08Rik	15.1813	15.4012	26.4868	15.3973	20.0486	22.0326	0.0540073	0.925203	NA	19.0231	19.1595
4930512B01Rik	13.5833	11.8471	24.2796	34.9006	12.2519	16.0237	0.393523	0.530932	NA	16.57	21.0587
4930512J16Rik	1.59803	0	4.41447	3.07946	3.34143	3.00444	1.05682	0.511263	NA	2.00417	3.14178
4930513N10Rik	11.1862	5.92353	5.51809	5.13243	6.68287	3.00444	-0.640589	0.526115	NA	7.54262	4.93991
4930515G01Rik	11.1862	5.92353	8.82895	8.2119	7.79668	16.0237	0.222711	0.77662	NA	8.64624	10.6774
4930519G04Rik	2.39705	0	3.31085	3.07946	2.22762	1.00148	0.291234	0.860264	NA	1.90263	2.10285
4930519K11Rik	0.799017	3.55412	3.31085	5.13243	2.22762	3.00444	0.429822	0.788031	NA	2.55466	3.45483
4930520O04Rik	3.99508	2.36941	6.62171	13.3443	5.56906	6.00889	1.05243	0.401108	NA	4.32873	8.30742
4930521E06Rik	3.19607	1.18471	0	2.05297	3.34143	1.00148	0.772025	0.668631	NA	1.46026	2.13196
4930523C07Rik	165.396	140.98	162.232	219.668	219.421	131.194	0.263251	0.270045	NA	156.203	190.094
4930525G20Rik	27.9656	17.7706	32.0049	22.5827	23.39	35.0518	0.0477359	0.92655	NA	25.9137	27.0082
4930526I15Rik	16.7793	11.8471	8.82895	11.2914	17.821	15.0222	0.264303	0.729411	NA	12.4851	14.7115
4930527F14Rik	0	1.18471	6.62171	0	4.45524	4.00592	0.655285	0.721063	NA	2.60214	2.82039
4930528A17Rik	3.99508	2.36941	0	4.10595	3.34143	7.01037	1.62437	0.30188	NA	2.1215	4.81925
4930533B01Rik	14.3823	10.6623	26.4868	31.8211	21.1624	25.037	0.677721	0.232729	NA	17.1772	26.0068
4930538K18Rik	2.39705	2.36941	3.31085	1.02649	0	3.00444	-1.65474	0.337469	NA	2.69244	1.34364
4930539E08Rik	1.59803	2.36941	0	3.07946	2.22762	0	0.576525	0.800929	NA	1.32248	1.76903
4930539J05Rik	11.1862	7.10823	16.5543	11.2914	6.68287	4.00592	-0.641647	0.459489	NA	11.6162	7.32672
4930544D05Rik	1.59803	0	3.31085	2.05297	0	2.00296	-0.559725	0.785893	NA	1.6363	1.35198
4930545L23Rik	3.99508	2.36941	3.31085	2.05297	4.45524	3.00444	-0.0660409	0.961553	NA	3.22512	3.17089
4930546K05Rik	0	3.55412	2.20724	0	2.22762	2.00296	-0.459922	0.845411	NA	1.92045	1.41019
4930547E08Rik	0.799017	0	1.10362	3.07946	1.11381	2.00296	1.66535	0.466709	NA	0.634212	2.06541
4930548H24Rik	0	1.18471	0	1.02649	1.11381	0	0.743583	0.798072	NA	0.394902	0.713433
4930549C15Rik	5.59312	1.18471	2.20724	4.10595	1.11381	0	-0.770536	0.697595	NA	2.99502	1.73992
4930549G23Rik	5.59312	3.55412	6.62171	4.10595	8.91049	10.0148	0.552692	0.57055	NA	5.25631	7.67708
4930550C14Rik	3.19607	2.36941	8.82895	3.07946	1.11381	4.00592	-0.827646	0.53078	NA	4.79814	2.73307
4930552P12Rik	4.7941	1.18471	3.31085	2.05297	3.34143	4.00592	-0.0174633	0.98962	NA	3.09655	3.13344
4930554I06Rik	0.799017	0	1.10362	1.02649	2.22762	1.00148	1.12962	0.595496	NA	0.634212	1.41853
4930556M19Rik	39.1518	37.9106	46.352	36.9535	56.8044	42.0622	0.134526	0.763911	NA	41.1381	45.2734
4930556N13Rik	3.99508	3.55412	6.62171	9.23838	11.1381	10.0148	1.13645	0.216868	NA	4.72364	10.1304
4930557A04Rik	6.39213	1.18471	2.20724	3.07946	4.45524	3.00444	0.0830674	0.950412	NA	3.26136	3.51305
4930557K07Rik	7.19115	5.92353	5.51809	13.3443	7.79668	14.0207	0.863224	0.313582	NA	6.21092	11.7206
4930558J18Rik	2.39705	0	1.10362	2.05297	4.45524	0	0.360722	0.898652	NA	1.16689	2.16941
4930562C15Rik	15.9803	7.10823	13.2434	14.3708	16.7072	20.0296	0.472132	0.486157	NA	12.1107	17.0359
4930562F07Rik	1.59803	0	3.31085	1.02649	3.34143	2.00296	0.650616	0.733596	NA	1.6363	2.12363
4930563D23Rik	3.99508	1.18471	5.51809	4.10595	2.22762	3.00444	-0.159826	0.900689	NA	3.56596	3.11267
4930563E18Rik	1.59803	0	1.10362	3.07946	4.45524	2.00296	1.76708	0.379361	NA	0.90055	3.17922
4930563E22Rik	3.99508	3.55412	13.2434	18.4768	12.2519	9.01333	1.15353	0.169905	NA	6.93087	13.2473
4930563F08Rik	22.3725	11.8471	34.2122	32.8476	20.0486	34.0504	0.351939	0.515918	NA	22.8106	28.9822
4930563M21Rik	0.799017	3.55412	1.10362	5.13243	0	3.00444	0.299987	0.873919	NA	1.81892	2.71229
4930564C03Rik	3.19607	2.36941	2.20724	3.07946	3.34143	3.00444	0.2786	0.86407	NA	2.5909	3.14178
4930565N06Rik	73.5095	47.3882	121.398	129.337	102.471	141.209	0.682794	0.0166063	NA	80.7653	124.339
4930570G19Rik	6.39213	7.10823	2.20724	4.10595	8.91049	4.00592	0.130661	0.904527	NA	5.23587	5.67412
4930577N17Rik	11.9852	10.6623	13.2434	23.6092	10.0243	16.0237	0.433752	0.528248	NA	11.9637	16.5524
4930578C19Rik	3.19607	7.10823	5.51809	7.18541	14.4795	10.0148	0.987494	0.303132	NA	5.27413	10.5599
4930578M01Rik	3.99508	1.18471	4.41447	4.10595	5.56906	5.0074	0.652441	0.597317	NA	3.19809	4.89414
4930579G18Rik	20.7744	21.3247	46.352	54.4038	43.4386	33.0489	0.662995	0.12881	NA	29.4837	43.6304
4930579G24Rik	11.9852	13.0318	11.0362	15.3973	20.0486	14.0207	0.445807	0.523856	NA	12.0177	16.4889
4930579H20Rik	6.39213	0	12.1398	3.07946	5.56906	11.0163	0.237461	0.833778	NA	6.17731	6.55494
4930579K19Rik	3.99508	2.36941	4.41447	6.15892	11.1381	4.00592	0.868451	0.429818	NA	3.59299	7.10099
4930581F22Rik	101.475	81.7447	145.678	162.185	121.405	171.253	0.487475	0.0639949	NA	109.632	151.615
4930583K01Rik	2.39705	0	1.10362	1.02649	0	0	-1.64659	0.554377	NA	1.16689	0.342162
4930590J08Rik	5.59312	4.73882	9.93256	1.02649	2.22762	3.00444	-1.63588	0.245368	NA	6.75483	2.08618
4930592I03Rik	12.7843	24.8788	15.4507	33.8741	15.5934	37.0548	0.632035	0.258878	NA	17.7046	28.8407
4930593A02Rik	3.99508	2.36941	0	2.05297	3.34143	1.00148	0.303009	0.859142	NA	2.1215	2.13196
4930594C11Rik	72.7105	62.7894	177.683	185.794	80.1944	182.27	0.579398	0.0343417	NA	104.394	149.419
4930595D18Rik	5.59312	0	2.20724	4.10595	6.68287	4.00592	0.87752	0.489483	NA	2.60012	4.93158
4930596I21Rik	10.3872	3.55412	11.0362	17.4503	14.4795	13.0193	0.859357	0.26453	NA	8.32584	14.983
4930597G03Rik	7.99017	5.92353	2.20724	29.7681	11.1381	9.01333	1.83402	0.0586143	NA	5.37364	16.6399
4930599N23Rik	5.59312	3.55412	5.51809	7.18541	5.56906	7.01037	0.428583	0.692225	NA	4.88844	6.58828
4931402G19Rik	2.39705	2.36941	3.31085	2.05297	6.68287	1.00148	-0.0924327	0.953694	NA	2.69244	3.24577
4931403E22Rik	6.39213	4.73882	7.72533	14.3708	14.4795	3.00444	0.623405	0.503503	NA	6.28543	10.6183
4931403G20Rik	14.3823	13.0318	23.176	41.0595	15.5934	25.037	0.69768	0.236452	NA	16.8633	27.23
4931406C07Rik	781.438	1076.9	916.003	1187.65	950.081	856.266	0.113348	0.601059	0.904659	924.78	997.998
4931406H21Rik	128.642	77.0059	164.439	234.039	82.422	155.23	0.314901	0.341724	NA	123.362	157.23
4931406P16Rik	557.714	624.34	645.617	696.985	578.068	589.872	0.0310071	0.843749	NA	609.223	621.642
4931408D14Rik	6.39213	4.73882	4.41447	6.15892	10.0243	6.00889	0.429497	0.672825	NA	5.18181	7.39737
4931414P19Rik	46.343	30.8023	36.4194	42.086	43.4386	31.0459	0.0265716	0.950509	NA	37.8549	38.8568
4931423N10Rik	1.59803	2.36941	3.31085	2.05297	1.11381	2.00296	-0.508283	0.769486	NA	2.4261	1.72325
4931428F04Rik	15.1813	9.47764	11.0362	12.3178	13.3657	11.0163	0.0257209	0.971396	NA	11.8984	12.2333
4931429L15Rik	2.39705	0	0	0	2.22762	0	-0.519887	0.853664	NA	0.799017	0.742541
4931430N09Rik	1.59803	2.36941	1.10362	0	5.56906	4.00592	0.863098	0.603873	NA	1.69035	3.19166
4931431C16Rik	5.59312	4.73882	8.82895	8.2119	8.91049	3.00444	0.0225852	0.980928	NA	6.38696	6.70894
4931440F15Rik	3.99508	0	1.10362	6.15892	1.11381	3.00444	0.875176	0.616652	NA	1.69957	3.42573
4931440P22Rik	1.59803	0	1.10362	4.10595	0	0	0.525283	0.822744	NA	0.90055	1.36865
4932416H05Rik	31.9607	33.1718	48.5592	55.4303	31.1867	40.0592	0.17104	0.690216	NA	37.8972	42.2254
4932418E24Rik	15.9803	9.47764	19.8651	9.23838	5.56906	16.0237	-0.727905	0.332755	NA	15.1077	10.277
4932435O22Rik	1.59803	2.36941	0	2.05297	2.22762	4.00592	1.32229	0.518173	NA	1.32248	2.76217
4932438A13Rik	2526.49	2282.93	3427.84	2887.51	2878.09	2742.05	0.0685908	0.537656	0.882539	2745.75	2835.88
4932438H23Rik	38.3528	24.8788	46.352	52.3508	34.5281	44.0652	0.261966	0.543948	NA	36.5279	43.648
4932441J04Rik	3.19607	1.18471	0	0	1.11381	2.00296	-0.148701	0.954704	NA	1.46026	1.03892
4933400A11Rik	2.39705	0	3.31085	1.02649	2.22762	6.00889	0.730421	0.698241	NA	1.90263	3.08767
4933400F21Rik	39.1518	26.0635	67.3207	68.7746	34.5281	50.074	0.255384	0.538715	NA	44.1787	51.1256
4933402D24Rik	5.59312	1.18471	3.31085	4.10595	6.68287	1.00148	-0.0354937	0.978428	NA	3.36289	3.9301
4933404O12Rik	43.1469	42.6494	38.6266	35.927	22.2762	36.0533	-0.430663	0.302694	NA	41.4743	31.4189
4933406C10Rik	3.19607	7.10823	7.72533	11.2914	7.79668	8.01185	0.635993	0.501737	NA	6.00988	9.03329
4933406G16Rik	0	1.18471	2.20724	4.10595	0	5.0074	1.271	0.519233	NA	1.13065	3.03778
4933406I18Rik	3.19607	2.36941	2.20724	7.18541	4.45524	1.00148	0.563574	0.696376	NA	2.5909	4.21404
4933406J10Rik	7.19115	2.36941	5.51809	8.2119	0	5.0074	-0.698261	0.597789	NA	5.02622	4.40643
4933407K13Rik	19.9754	14.2165	22.0724	19.5033	12.2519	19.0281	-0.168826	0.768613	NA	18.7547	16.9278
4933408B17Rik	11.9852	11.8471	23.176	26.6887	24.5038	17.0252	0.593455	0.38054	NA	15.6694	22.7392
4933411K16Rik	8.78918	3.55412	1.10362	7.18541	6.68287	7.01037	0.747508	0.513855	NA	4.48231	6.95955
4933412E12Rik	10.3872	4.73882	12.1398	10.2649	12.2519	4.00592	-0.112444	0.894017	NA	9.08861	8.84091
4933413J09Rik	2.39705	7.10823	14.347	14.3708	4.45524	12.0178	0.496448	0.573397	NA	7.95077	10.2813
4933416M06Rik	2.39705	1.18471	4.41447	1.02649	4.45524	1.00148	-0.489005	0.774666	NA	2.66541	2.16107
4933416M07Rik	4.7941	2.36941	4.41447	7.18541	10.0243	10.0148	1.24097	0.237507	NA	3.85933	9.07484
4933417D19Rik	7.19115	11.8471	14.347	10.2649	11.1381	16.0237	0.191676	0.803685	NA	11.1284	12.4756
4933417E11Rik	0.799017	2.36941	1.10362	3.07946	3.34143	1.00148	0.764205	0.692002	NA	1.42402	2.47413
4933417G07Rik	0.799017	2.36941	2.20724	1.02649	1.11381	3.00444	-0.155122	0.930492	NA	1.79189	1.71491
4933417O13Rik	7.99017	3.55412	7.72533	15.3973	3.34143	7.01037	0.366982	0.695842	NA	6.4232	8.58304
4933421O10Rik	209.342	161.12	252.729	244.304	212.738	269.398	0.226126	0.273513	NA	207.73	242.147
4933422A05Rik	0.799017	1.18471	5.51809	3.07946	1.11381	2.00296	0.221872	0.905601	NA	2.5006	2.06541
4933424G05Rik	15.9803	11.8471	43.0411	29.7681	25.6177	32.0474	0.481588	0.345041	NA	23.6228	29.1444
4933424G06Rik	0.799017	0	0	3.07946	1.11381	0	1.89322	0.465072	NA	0.266339	1.39776
4933427D14Rik	121.451	122.025	151.196	163.211	133.657	184.272	0.278906	0.240904	NA	131.557	160.38
4933427G17Rik	15.9803	15.4012	22.0724	14.3708	8.91049	23.0341	-0.296204	0.639976	NA	17.818	15.4385
4933428G20Rik	0.799017	3.55412	2.20724	1.02649	2.22762	4.00592	0.113328	0.944378	NA	2.18679	2.42001
4933430I17Rik	2.39705	1.18471	3.31085	7.18541	2.22762	1.00148	0.639908	0.698101	NA	2.29754	3.4715
4933431E20Rik	131.039	136.241	175.475	142.682	120.292	112.166	-0.226448	0.343132	NA	147.585	125.046
4933431G14Rik	11.1862	15.4012	13.2434	19.5033	13.3657	11.0163	0.139074	0.835578	NA	13.2769	14.6284
4933433G15Rik	11.9852	1.18471	6.62171	10.2649	10.0243	11.0163	0.65144	0.508788	NA	6.59722	10.4352
4933433G19Rik	10.3872	11.8471	14.347	19.5033	7.79668	10.0148	0.0269963	0.972068	NA	12.1938	12.4382
4933433H22Rik	0.799017	0	0	2.05297	4.45524	1.00148	2.5717	0.23966	NA	0.266339	2.50323
4933434E20Rik	731.1	799.676	762.6	802.713	834.245	770.139	0.0700195	0.620168	0.914291	764.459	802.365
4933439C10Rik	42.3479	33.1718	45.2483	69.8011	47.8939	74.1096	0.638377	0.094365	NA	40.256	63.9349
4933439K11Rik	36.7548	27.2482	27.5905	27.7151	24.5038	28.0415	-0.202541	0.679039	NA	30.5311	26.7535
5031414D18Rik	58.3282	17.7706	14.347	59.5362	101.357	20.0296	0.899561	0.0726737	NA	30.1486	60.3076
5031425E22Rik	243.7	212.062	301.288	328.476	298.501	292.432	0.291007	0.11972	NA	252.35	306.47
5031425F14Rik	1.59803	1.18471	4.41447	2.05297	1.11381	1.00148	-0.554004	0.751435	NA	2.39907	1.38942
5031426D15Rik	26.3675	18.9553	27.5905	44.1389	40.0972	54.08	0.912301	0.0423479	NA	24.3044	46.1054
5031434C07Rik	2.39705	0	5.51809	7.18541	5.56906	4.00592	1.35679	0.303967	NA	2.63838	5.5868
5031434O11Rik	7.99017	3.55412	12.1398	21.5562	14.4795	14.0207	1.12079	0.134316	NA	7.89469	16.6855
5031439G07Rik	735.894	755.842	695.279	544.038	495.646	637.943	-0.391204	0.00535161	NA	729.005	559.209
5033403F01Rik	1.59803	3.55412	3.31085	3.07946	4.45524	2.00296	0.136693	0.922772	NA	2.821	3.17922
5033406O09Rik	40.7498	33.1718	47.4556	34.9006	27.8453	46.0681	-0.172822	0.7133	NA	40.4591	36.2713
5330417C22Rik	1749.05	1666.88	1708.4	1625.96	1113.81	1845.73	-0.194144	0.219397	0.710773	1708.11	1528.5
5330426P16Rik	53.5341	63.9741	70.6316	71.8541	71.2839	53.0785	0.06357	0.850499	NA	62.7133	65.4055
5430402O13Rik	3.19607	3.55412	6.62171	3.07946	4.45524	4.00592	-0.148703	0.905897	NA	4.4573	3.84688
5430405H02Rik	15.9803	13.0318	16.5543	14.3708	17.821	16.0237	0.0802904	0.897664	NA	15.1888	16.0718
5430416N02Rik	28.7646	36.7259	49.6628	46.1919	33.4143	53.0785	0.213518	0.599452	NA	38.3844	44.2282
5430416O09Rik	7.99017	7.10823	11.0362	12.3178	7.79668	10.0148	0.195871	0.821435	NA	8.71153	10.0431
5430427O19Rik	31.9607	11.8471	12.1398	33.8741	70.1701	13.0193	0.841064	0.127854	NA	18.6492	39.0211
5430431A17Rik	5.59312	4.73882	13.2434	11.2914	10.0243	14.0207	0.631093	0.457061	NA	7.85845	11.7788
5430437J10Rik	1.59803	2.36941	5.51809	3.07946	6.68287	4.00592	0.665033	0.582803	NA	3.16185	4.58942
5530601H04Rik	58.3282	49.7576	87.1858	58.5098	75.7392	73.1081	0.118519	0.726089	NA	65.0906	69.119
5730405O15Rik	21.5734	20.14	11.0362	19.5033	11.1381	26.0385	0.0559188	0.926944	NA	17.5832	18.8933
5730408K05Rik	21.5734	23.6941	14.347	21.5562	63.4872	22.0326	0.714233	0.17891	NA	19.8715	35.692
5730409E04Rik	187.769	169.413	158.921	157.053	134.771	184.272	-0.131758	0.541451	NA	172.034	158.699
5730420D15Rik	5.59312	4.73882	12.1398	6.15892	4.45524	8.01185	-0.166123	0.867368	NA	7.49058	6.20867
5730422E09Rik	6.39213	1.18471	3.31085	4.10595	3.34143	3.00444	-0.0805763	0.95335	NA	3.62923	3.48394
5730435O14Rik	4.7941	2.36941	8.82895	4.10595	2.22762	1.00148	-1.01798	0.44301	NA	5.33082	2.44502
5730455P16Rik	453.841	415.832	528.633	495.793	491.191	489.724	0.0844881	0.570718	NA	466.102	492.236
5730480H06Rik	15.1813	9.47764	19.8651	30.7946	31.1867	22.0326	0.935856	0.107734	NA	14.8414	28.0046
5730488B01Rik	4.7941	0	0	5.13243	4.45524	0	1.4179	0.566676	NA	1.59803	3.19589
5730507C01Rik	6.39213	7.10823	2.20724	6.15892	10.0243	3.00444	0.270362	0.772025	NA	5.23587	6.39589
5730508B09Rik	182.176	200.215	252.729	184.768	198.258	175.259	-0.169204	0.550579	NA	211.707	186.095
5730522E02Rik	0.799017	0	4.41447	0	1.11381	2.00296	-0.122909	0.956341	NA	1.73783	1.03892
5730559C18Rik	11.1862	4.73882	13.2434	17.4503	13.3657	13.0193	0.618909	0.382166	NA	9.72282	14.6118
5830411N06Rik	0.799017	0	0	34.9006	37.8696	0	5.67126	0.000399529	NA	0.266339	24.2567
5830415F09Rik	86.2938	125.579	93.8075	124.205	114.723	129.191	0.272793	0.311765	NA	101.893	122.706
5830416I19Rik	42.3479	28.4329	55.1809	32.8476	35.642	29.0429	-0.341	0.454041	NA	41.9872	32.5108
5830416P10Rik	14.3823	7.10823	2.20724	22.5827	25.6177	4.00592	1.08705	0.24621	NA	7.89926	17.4021
5830417I10Rik	134.235	136.241	165.543	195.033	130.316	168.249	0.174609	0.449732	NA	145.34	164.532
5830418P13Rik	5.59312	2.36941	1.10362	2.05297	2.22762	0	-1.14502	0.595775	NA	3.02205	1.42687
5830428M24Rik	24.7695	23.6941	34.2122	49.2714	47.8939	27.04	0.584377	0.218688	NA	27.5586	41.4017
5830432E09Rik	12.7843	3.55412	3.31085	15.3973	8.91049	6.00889	0.714603	0.457144	NA	6.54975	10.1056
5830444B04Rik	17.5784	5.92353	30.9013	22.5827	31.1867	6.00889	0.0694163	0.917339	NA	18.1344	19.9261
5830454E08Rik	14.3823	13.0318	7.72533	9.23838	11.1381	12.0178	-0.0889441	0.902294	NA	11.7131	10.7981
5930403L14Rik	3.99508	15.4012	3.31085	3.07946	10.0243	12.0178	0.158932	0.885756	NA	7.56904	8.37384
5930412G12Rik	23.1715	16.5859	40.8339	20.5297	20.0486	20.0296	-0.352449	0.525189	NA	26.8637	20.2027
5930430L01Rik	45.5439	34.3565	45.2483	110.861	87.9911	75.1111	1.12768	0.00127448	NA	41.7163	91.3209
5930438M14Rik	3.19607	0	1.10362	4.10595	2.22762	4.00592	1.1968	0.586702	NA	1.43323	3.4465
6030408B16Rik	0	0	0	0	3.34143	5.0074	3.88446	0.07451	NA	0	2.78295
6030419C18Rik	12.7843	11.8471	5.51809	3.07946	5.56906	8.01185	-0.793446	0.394953	NA	10.0498	5.55345
6030443J06Rik	35.1567	23.6941	47.4556	44.1389	26.7315	32.0474	-0.0244136	0.956562	NA	35.4355	34.3059
6030458C11Rik	440.258	386.214	455.794	415.727	408.769	450.666	-0.00875936	0.956311	NA	427.422	425.054
6030466F02Rik	0	1.18471	0	2.05297	2.22762	1.00148	2.22116	0.319393	NA	0.394902	1.76069
6030468B19Rik	1.59803	0	0	4.10595	1.11381	1.00148	2.02629	0.400344	NA	0.532678	2.07375
6230400D17Rik	5.59312	8.29294	12.1398	25.6622	22.2762	18.0267	1.41003	0.0625192	NA	8.67529	21.9884
6330403A02Rik	7.19115	4.73882	9.93256	4.10595	10.0243	4.00592	-0.350549	0.746273	NA	7.28751	6.04539
6330403K07Rik	11.9852	11.8471	9.93256	6.15892	11.1381	7.01037	-0.501064	0.569094	NA	11.255	8.10247
6330407A03Rik	13.5833	7.10823	13.2434	28.7416	33.4143	5.0074	0.778738	0.276489	NA	11.3116	22.3878
6330408A02Rik	66.3184	53.3117	58.4918	62.6157	35.642	56.0829	-0.244641	0.527862	NA	59.374	51.4469
6330409D20Rik	9.5882	1.18471	1.10362	7.18541	16.7072	3.00444	1.19278	0.359763	NA	3.95884	8.96567
6330410L21Rik	763.061	559.181	1101.41	869.434	700.587	1085.61	0.144829	0.44449	0.847425	807.884	885.209
6330415G19Rik	15.1813	8.29294	12.1398	14.3708	18.9348	20.0296	0.571528	0.379756	NA	11.8714	17.7784
6330416G13Rik	51.1371	61.6047	48.5592	75.96	105.812	57.0844	0.529444	0.140723	NA	53.767	79.6188
6330418K02Rik	4.7941	8.29294	11.0362	3.07946	6.68287	8.01185	-0.395559	0.691236	NA	8.04107	5.92473
6330549D23Rik	17.5784	15.4012	28.6941	21.5562	22.2762	15.0222	-0.0320137	0.95537	NA	20.5579	19.6182
6430531B16Rik	4.7941	3.55412	5.51809	1.02649	3.34143	3.00444	-0.90177	0.505505	NA	4.6221	2.45745
6430548M08Rik	3556.42	4364.46	2962.11	3101.02	2366.85	3849.69	-0.241449	0.0260827	0.338643	3627.66	3105.85
6430550D23Rik	11.1862	8.29294	20.9687	18.4768	20.0486	20.0296	0.628899	0.313788	NA	13.4826	19.5183
6430562O15Rik	1.59803	3.55412	5.51809	6.15892	0	4.00592	-0.375214	0.79466	NA	3.55675	3.38828
6430571L13Rik	20.7744	15.4012	18.7615	9.23838	15.5934	15.0222	-0.468882	0.444347	NA	18.3124	13.2847
6430573F11Rik	106.269	123.209	134.641	107.781	113.609	91.1348	-0.218227	0.401194	NA	121.373	104.175
6430584L05Rik	3.19607	1.18471	0	1.02649	1.11381	0	-0.585027	0.838667	NA	1.46026	0.713433
6530402F18Rik	40.7498	21.3247	22.0724	40.033	32.3005	27.04	0.245913	0.60785	NA	28.049	33.1245
6530403H02Rik	2.39705	1.18471	2.20724	3.07946	4.45524	5.0074	1.11207	0.541353	NA	1.92966	4.1807
6720489N17Rik	15.1813	20.14	17.6579	15.3973	25.6177	10.0148	-0.150399	0.815344	NA	17.6597	17.0099
6820408C15Rik	17.5784	8.29294	28.6941	20.5297	16.7072	31.0459	0.383707	0.514402	NA	18.1885	22.7609
6820431F20Rik	25.5685	27.2482	29.7977	40.033	31.1867	42.0622	0.449512	0.334593	NA	27.5382	37.7606
7420701I03Rik	2.39705	1.18471	2.20724	0	0	3.00444	-1.76683	0.380723	NA	1.92966	1.00148
8030423F21Rik	0	0	1.10362	2.05297	0	2.00296	1.67072	0.523389	NA	0.367873	1.35198
8030462N17Rik	429.072	440.71	475.659	381.853	434.386	405.6	-0.136913	0.390469	NA	448.481	407.28
8430408G22Rik	8.78918	21.3247	9.93256	17.4503	31.1867	14.0207	0.587186	0.400317	NA	13.3488	20.8859
8430419L09Rik	1200.92	1204.85	1284.61	1260.53	765.188	1213.79	-0.217596	0.110884	0.588509	1230.13	1079.84
8430426J06Rik	4.7941	3.55412	2.20724	3.07946	4.45524	1.00148	-0.410952	0.763484	NA	3.51848	2.8454
8430429K09Rik	38.3528	33.1718	41.9375	30.7946	37.8696	28.0415	-0.234298	0.582678	NA	37.8207	32.2352
8430431K14Rik	4.7941	0	5.51809	7.18541	7.79668	8.01185	1.20067	0.242556	NA	3.4374	7.66464
8430436N08Rik	6.39213	5.92353	5.51809	4.10595	1.11381	3.00444	-1.23022	0.329762	NA	5.94458	2.7414
9030025P20Rik	14.3823	18.9553	18.7615	26.6887	21.1624	17.0252	0.317934	0.585656	NA	17.3664	21.6254
9030404E10Rik	0	0	0	3.07946	4.45524	1.00148	3.75872	0.157861	NA	0	2.8454
9030612E09Rik	0.799017	2.36941	2.20724	5.13243	1.11381	1.00148	0.471333	0.794903	NA	1.79189	2.41591
9030617O03Rik	308.42	254.712	268.179	303.84	287.363	266.394	0.0432109	0.818323	NA	277.104	285.866
9030624G23Rik	7.99017	3.55412	4.41447	3.07946	4.45524	6.00889	-0.255432	0.82194	NA	5.31959	4.51453
9030624J02Rik	541.733	524.825	538.566	482.449	491.191	527.78	-0.100087	0.527739	NA	535.041	500.473
9130008F23Rik	91.8869	74.6364	98.222	85.1984	124.747	91.1348	0.17091	0.575418	NA	88.2485	100.36
9130011E15Rik	170.191	156.381	188.719	157.053	175.982	168.249	-0.0364016	0.863674	NA	171.763	167.094
9130019O22Rik	56.7302	67.5282	57.3881	63.6422	63.4872	61.0903	0.0548937	0.873318	NA	60.5488	62.7399
9130019P16Rik	7.19115	5.92353	12.1398	9.23838	7.79668	10.0148	0.151289	0.853968	NA	8.41816	9.01662
9130023H24Rik	135.034	146.903	158.921	131.39	139.226	134.198	-0.118084	0.607664	NA	146.953	134.938
9130024F11Rik	1.59803	0	4.41447	0	0	1.00148	-2.21302	0.438968	NA	2.00417	0.333827
9130221H12Rik	58.3282	39.0953	57.3881	55.4303	53.4629	63.0933	0.139291	0.706953	NA	51.6039	57.3288
9130230L23Rik	285.249	300.915	364.194	330.529	196.031	285.422	-0.237365	0.28567	NA	316.786	270.661
9130401M01Rik	191.764	213.247	146.781	175.529	190.462	206.305	0.0656241	0.770726	NA	183.931	190.765
9130409I23Rik	7.19115	3.55412	2.20724	1.02649	5.56906	2.00296	-0.782916	0.53312	NA	4.3175	2.86617
9230110C19Rik	19.9754	20.14	29.7977	21.5562	22.2762	24.0355	-0.0230738	0.967369	NA	23.3044	22.6227
9230112J17Rik	5.59312	5.92353	5.51809	5.13243	13.3657	6.00889	0.42059	0.672179	NA	5.67825	8.16902
9230114K14Rik	31.1616	29.6176	22.0724	39.0065	35.642	20.0296	0.168245	0.725007	NA	27.6172	31.5594
9230116L04Rik	3.99508	7.10823	12.1398	4.10595	6.68287	6.00889	-0.348499	0.732945	NA	7.74771	5.59923
9230116N13Rik	7.99017	5.92353	8.82895	20.5297	18.9348	8.01185	1.01678	0.201592	NA	7.58088	15.8255
9230117E06Rik	3.99508	3.55412	4.41447	8.2119	5.56906	5.0074	0.649377	0.556308	NA	3.98789	6.26279
9330020H09Rik	43.1469	34.3565	25.3832	34.9006	35.642	36.0533	0.0556804	0.905448	NA	34.2955	35.5319
9330102E08Rik	12.7843	14.2165	18.7615	15.3973	7.79668	19.0281	-0.183677	0.790074	NA	15.2541	14.074
9330133O14Rik	20.7744	13.0318	24.2796	31.8211	42.3248	28.0415	0.813415	0.115527	NA	19.3619	34.0625
9330136K24Rik	10.3872	13.0318	20.9687	21.5562	15.5934	16.0237	0.311708	0.612884	NA	14.7959	17.7244
9330151L19Rik	131.838	101.885	206.377	219.668	116.95	194.287	0.285121	0.236291	NA	146.7	176.969
9330159F19Rik	39.1518	71.0823	30.9013	48.2449	38.9834	43.0637	-0.0715776	0.866582	NA	47.0452	43.4307
9330159M07Rik	10.3872	5.92353	8.82895	9.23838	11.1381	9.01333	0.217456	0.794058	NA	8.3799	9.79661
9330162012Rik	63.9213	63.9741	75.046	65.6952	61.2596	60.0889	-0.117226	0.726071	NA	67.6472	62.3479
9330162B11Rik	55.1321	49.7576	174.372	108.808	59.032	110.163	0.190162	0.529531	NA	93.0872	92.6675
9330175E14Rik	25.5685	4.73882	14.347	18.4768	28.9591	23.0341	0.633299	0.343967	NA	14.8848	23.49
9330179D12Rik	2.39705	0	2.20724	2.05297	3.34143	2.00296	0.681961	0.706408	NA	1.53476	2.46579
9330182L06Rik	3.99508	7.10823	9.93256	6.15892	2.22762	8.01185	-0.46003	0.698234	NA	7.01196	5.46613
9330188P03Rik	2.39705	3.55412	3.31085	5.13243	1.11381	4.00592	-0.0402777	0.977202	NA	3.08734	3.41739
9430015G10Rik	69.5144	72.267	67.3207	95.4633	98.0154	82.1214	0.396067	0.190699	NA	69.7007	91.8667
9430016H08Rik	115.058	136.241	114.776	122.152	162.616	102.151	0.0587083	0.818702	NA	122.025	128.973
9430018G01Rik	7.19115	2.36941	12.1398	7.18541	15.5934	4.00592	0.202123	0.83023	NA	7.23345	8.92823
9430020K01Rik	175.784	207.323	147.885	146.788	214.966	163.241	-0.0184694	0.936766	NA	176.997	174.998
9430021M05Rik	1.59803	0	1.10362	2.05297	2.22762	4.00592	1.44948	0.525342	NA	0.90055	2.76217
9430037G07Rik	14.3823	21.3247	16.5543	30.7946	16.7072	30.0444	0.530191	0.347749	NA	17.4204	25.8487
9430038I01Rik	49.539	67.5282	30.9013	52.3508	63.4872	34.0504	0.0414347	0.916201	NA	49.3229	49.9628
9430060I03Rik	7.19115	3.55412	6.62171	3.07946	5.56906	4.00592	-0.464706	0.667354	NA	5.78899	4.21815
9430065F17Rik	20.7744	18.9553	36.4194	20.5297	14.4795	11.0163	-0.670322	0.253303	NA	25.383	15.3419
9430076C15Rik	3.99508	1.18471	2.20724	5.13243	1.11381	2.00296	0.0723407	0.959797	NA	2.46234	2.74974
9430078K24Rik	1.59803	0	1.10362	0	3.34143	2.00296	0.924995	0.694978	NA	0.90055	1.78147
9430083A17Rik	35.9557	28.4329	52.9737	68.7746	59.032	34.0504	0.474547	0.244586	NA	39.1208	53.9523
9430091E24Rik	80.7007	73.4517	110.362	121.125	123.633	94.1392	0.373955	0.175006	NA	88.1714	112.966
9530002B09Rik	113.46	220.355	122.502	68.7746	121.405	82.1214	-0.756263	0.017628	NA	152.106	90.7672
9530020I12Rik	7.19115	9.47764	4.41447	11.2914	2.22762	8.01185	-0.076568	0.938222	NA	7.02776	7.17694
9530026P05Rik	15.9803	13.0318	9.93256	22.5827	24.5038	26.0385	0.895845	0.153599	NA	12.9816	24.375
9530027J09Rik	0	3.55412	8.82895	6.15892	4.45524	6.00889	0.9319	0.46756	NA	4.12769	5.54102
9530051G07Rik	0.799017	2.36941	4.41447	0	1.11381	1.00148	-1.64319	0.456856	NA	2.52763	0.705097
9530052E02Rik	1.59803	0	2.20724	3.07946	5.56906	4.00592	1.84787	0.244511	NA	1.26842	4.21815
9530053A07Rik	1.59803	0	2.20724	2.05297	1.11381	1.00148	0.324965	0.889777	NA	1.26842	1.38942
9530059O14Rik	0	1.18471	0	2.05297	3.34143	1.00148	2.27473	0.368125	NA	0.394902	2.13196
9530062K07Rik	20.7744	15.4012	18.7615	14.3708	24.5038	24.0355	0.186175	0.772063	NA	18.3124	20.9701
9530068E07Rik	1310.39	1583.95	1347.52	1251.29	1574.93	1304.93	-0.0414146	0.757026	0.948639	1413.95	1377.05
9530077C05Rik	7.19115	3.55412	6.62171	20.5297	11.1381	15.0222	1.39599	0.0884138	NA	5.78899	15.5634
9530080O11Rik	7.99017	10.6623	13.2434	15.3973	12.2519	18.0267	0.528022	0.472379	NA	10.632	15.2253
9530082P21Rik	139.029	130.318	102.636	131.39	111.381	149.221	0.0705614	0.77403	NA	123.994	130.664
9530091C08Rik	53.5341	37.9106	39.7303	65.6952	38.9834	68.1007	0.334505	0.440535	NA	43.725	57.5931
9630013A20Rik	3.19607	0	3.31085	2.05297	2.22762	1.00148	-0.247486	0.89704	NA	2.16897	1.76069
9630013K17Rik	3.19607	1.18471	2.20724	6.15892	2.22762	4.00592	0.862717	0.542985	NA	2.196	4.13082
9630028B13Rik	3.19607	2.36941	2.20724	5.13243	5.56906	2.00296	0.638434	0.611331	NA	2.5909	4.23482
9630028H03Rik	7.99017	10.6623	14.347	9.23838	8.91049	11.0163	-0.170491	0.852045	NA	10.9999	9.72172
9630028I04Rik	3.19607	1.18471	0	2.05297	2.22762	2.00296	0.923649	0.607499	NA	1.46026	2.09452
9830132P13Rik	2.39705	1.18471	1.10362	4.10595	2.22762	1.00148	0.56627	0.762982	NA	1.56179	2.44502
9830147E19Rik	69.5144	61.6047	93.8075	80.066	120.292	73.1081	0.276802	0.349445	NA	74.9756	91.1552
9830166K06Rik	2.39705	2.36941	6.62171	4.10595	2.22762	5.0074	0.0317558	0.979998	NA	3.79606	3.78033
9930012K11Rik	21.5734	22.5094	11.0362	19.5033	25.6177	17.0252	0.213232	0.716671	NA	18.373	20.7154
9930014A18Rik	166.195	140.98	231.76	238.145	139.226	223.33	0.149602	0.536149	NA	179.645	200.234
9930021J03Rik	512.17	471.513	629.062	487.581	444.411	509.754	-0.155267	0.293528	NA	537.582	480.582
9930104L06Rik	97.48	95.9611	103.74	133.443	119.178	112.166	0.296917	0.241299	NA	99.0604	121.596
9930111J21Rik1	41.5489	27.2482	26.4868	40.033	60.1458	7.01037	-0.118338	0.826554	NA	31.7613	35.7297
9930111J21Rik2	3.99508	1.18471	1.10362	4.10595	10.0243	0	0.460911	0.769177	NA	2.09447	4.71008
A130010J15Rik	320.406	331.718	337.707	318.211	263.973	332.492	-0.121226	0.471754	NA	329.943	304.892
A130077B15Rik	0.799017	2.36941	0	4.10595	4.45524	3.00444	2.18571	0.249752	NA	1.05614	3.85521
A230009B12Rik	3.99508	1.18471	1.10362	5.13243	1.11381	1.00148	0.259681	0.884621	NA	2.09447	2.41591
A230020J21Rik	0.799017	1.18471	1.10362	2.05297	0	2.00296	0.0189456	0.992956	NA	1.02911	1.35198
A230046K03Rik	1060.3	893.268	1243.78	1183.54	1283.11	1109.64	0.171086	0.165485	0.649347	1065.78	1192.1
A230050P20Rik	34.3577	28.4329	20.9687	48.2449	40.0972	43.0637	0.666937	0.126985	NA	27.9198	43.8019
A230056J06Rik	1.59803	0	2.20724	1.02649	1.11381	1.00148	-0.171232	0.944409	NA	1.26842	1.04726
A230056P14Rik	25.5685	31.987	23.176	39.0065	42.3248	30.0444	0.45473	0.336528	NA	26.9105	37.1253
A230065H16Rik	1.59803	1.18471	3.31085	1.02649	3.34143	2.00296	0.0370718	0.985235	NA	2.0312	2.12363
A230072C01Rik	31.1616	62.7894	54.0773	46.1919	55.6906	47.0696	0.0208887	0.959058	NA	49.3428	49.6507
A230072E10Rik	23.9705	23.6941	38.6266	44.1389	34.5281	54.08	0.627089	0.136487	NA	28.7637	44.249
A230103J11Rik	5.59312	7.10823	15.4507	11.2914	11.1381	12.0178	0.40245	0.594286	NA	9.384	11.4824
A230108P19Rik	5.59312	0	2.20724	4.10595	1.11381	1.00148	-0.192562	0.918893	NA	2.60012	2.07375
A2m	3.19607	7.10823	3.31085	6.15892	3.34143	5.0074	0.0890715	0.935336	NA	4.53838	4.83592
A330009N23Rik	0	2.36941	1.10362	3.07946	2.22762	1.00148	0.862854	0.692205	NA	1.15768	2.10285
A330023F24Rik	353.165	229.833	567.26	579.965	410.996	594.88	0.513073	0.00512591	NA	383.419	528.614
A330032B11Rik	5.59312	2.36941	7.72533	14.3708	11.1381	9.01333	1.18217	0.187588	NA	5.22929	11.5074
A330033J07Rik	3.99508	2.36941	5.51809	4.10595	4.45524	4.00592	0.0704772	0.956987	NA	3.96086	4.18904
A330035P11Rik	43.9459	40.28	46.352	51.3243	43.4386	39.0578	0.0372656	0.926487	NA	43.526	44.6069
A330040F15Rik	0.799017	2.36941	5.51809	3.07946	12.2519	3.00444	0.992387	0.458066	NA	2.89551	6.11194
A330041J22Rik	0.799017	2.36941	2.20724	4.10595	2.22762	1.00148	0.386539	0.832053	NA	1.79189	2.44502
A330048O09Rik	11.1862	15.4012	16.5543	8.2119	13.3657	11.0163	-0.395394	0.582155	NA	14.3806	10.8646
A330069E16Rik	4.7941	1.18471	0	7.18541	6.68287	3.00444	1.9111	0.186247	NA	1.99294	5.62424
A330074K22Rik	0.799017	2.36941	1.10362	0	2.22762	1.00148	-0.523946	0.81033	NA	1.42402	1.07637
A330076H08Rik	0	0	1.10362	1.02649	1.11381	2.00296	1.95749	0.465913	NA	0.367873	1.38109
A330102I10Rik	1.59803	4.73882	0	4.10595	3.34143	3.00444	1.13287	0.462719	NA	2.11229	3.48394
A3galt2	32.7597	31.987	26.4868	35.927	22.2762	36.0533	0.0214161	0.962604	NA	30.4112	31.4189
A430005L14Rik	184.573	248.788	140.16	156.026	206.055	142.21	-0.173036	0.466839	NA	191.174	168.097
A430033K04Rik	154.21	165.859	148.988	165.264	128.088	166.246	-0.0385245	0.862418	NA	156.352	153.2
A430035B10Rik	25.5685	14.2165	30.9013	47.2184	56.8044	16.0237	0.664362	0.202603	NA	23.5621	40.0155
A430046D13Rik	37.5538	28.4329	29.7977	46.1919	57.9182	45.0666	0.628699	0.133975	NA	31.9281	49.7256
A430078G23Rik	58.3282	5.92353	7.72533	98.5428	141.454	16.0237	1.84171	0.00469971	NA	23.9924	85.3402
A430078I02Rik	71.1125	31.987	52.9737	45.1654	47.8939	55.0815	-0.0703228	0.883763	NA	52.0244	49.3803
A430088P11Rik	8.78918	4.73882	13.2434	13.3443	22.2762	8.01185	0.669458	0.384623	NA	8.92381	14.5441
A430090L17Rik	12.7843	16.5859	17.6579	15.3973	13.3657	29.0429	0.237343	0.682935	NA	15.676	19.2687
A430093F15Rik	3.99508	0	1.10362	8.2119	8.91049	0	1.47815	0.394696	NA	1.69957	5.70746
A430105I19Rik	115.058	87.6682	84.9786	114.967	95.7878	138.204	0.2596	0.400704	NA	95.9017	116.32
A4galt	70.3135	56.8659	48.5592	67.7481	80.1944	40.0592	0.0662578	0.855514	NA	58.5795	62.6673
A4gnt	143.024	78.1906	129.123	94.4368	90.2187	137.203	-0.0969808	0.952072	NA	116.779	107.286
A530006G24Rik	10.3872	3.55412	5.51809	24.6357	10.0243	13.0193	1.24811	0.181787	NA	6.48647	15.8931
A530013C23Rik	12.7843	21.3247	7.72533	25.6622	22.2762	22.0326	0.827936	0.187927	NA	13.9448	23.3237
A530016L24Rik	7.99017	65.1588	7.72533	25.6622	79.0806	22.0326	0.414068	0.631521	NA	26.9581	42.2584
A530032D15Rik	59.9262	52.127	67.3207	55.4303	70.1701	47.0696	-0.066566	0.845778	NA	59.7913	57.5567
A530050N04Rik	0	10.6623	0	1.02649	5.56906	0	-2.2582	0.559836	NA	3.55412	2.19851
A530053G22Rik	0.799017	10.6623	2.20724	3.07946	14.4795	1.00148	-0.492532	0.75616	NA	4.5562	6.18683
A530064D06Rik	3.99508	1.18471	0	2.05297	0	0	-0.58911	0.816299	NA	1.7266	0.684325
A530065N20Rik	0.799017	2.36941	0	0	1.11381	0	-1.6304	0.552693	NA	1.05614	0.37127
A530072M11Rik	27.9656	30.8023	43.0411	34.9006	28.9591	29.0429	-0.104829	0.817596	NA	33.9363	30.9675
A530088E08Rik	1.59803	1.18471	1.10362	4.10595	6.68287	2.00296	1.57517	0.360818	NA	1.29545	4.26393
A530099J19Rik	16.7793	11.8471	3.31085	19.5033	37.8696	4.00592	0.788779	0.317837	NA	10.6458	20.4596
A630001G21Rik	54.3331	10.6623	18.7615	62.6157	114.723	16.0237	0.958915	0.0657299	NA	27.919	64.454
A630020A06	5.59312	2.36941	3.31085	2.05297	3.34143	6.00889	-0.0754549	0.956093	NA	3.75779	3.8011
A630023P12Rik	3.99508	0	0	1.02649	6.68287	0	0.376373	0.887007	NA	1.33169	2.56978
A630033H20Rik	27.1666	5.92353	11.0362	30.7946	62.3734	8.01185	0.885222	0.17857	NA	14.7088	33.7266
A630066F11Rik	32.7597	24.8788	36.4194	26.6887	33.4143	32.0474	-0.0185029	0.968277	NA	31.3526	30.7168
A630072M18Rik	43.1469	49.7576	58.4918	84.1719	71.2839	48.0711	0.428958	0.230817	NA	50.4654	67.8423
A630073D07Rik	1225.69	1742.7	1646.6	1884.63	2226.51	1729.56	0.334279	0.0425509	0.428509	1538.33	1946.9
A630075F10Rik	3.19607	8.29294	9.93256	5.13243	6.68287	10.0148	0.0800566	0.935864	NA	7.14052	7.2767
A630077J23Rik	0.799017	3.55412	1.10362	3.07946	2.22762	4.00592	0.821544	0.549766	NA	1.81892	3.10434
A630089N07Rik	16.7793	16.5859	33.1085	29.7681	33.4143	20.0296	0.376905	0.453579	NA	22.1579	27.7374
A630095N17Rik	14.3823	10.6623	8.82895	16.4238	4.45524	9.01333	-0.241838	0.766079	NA	11.2912	9.96412
A730017C20Rik	0	3.55412	1.10362	4.10595	2.22762	4.00592	1.24639	0.49937	NA	1.55258	3.4465
A730017L22Rik	47.142	50.9423	76.1497	54.4038	46.7801	46.0681	-0.209499	0.566045	NA	58.078	49.084
A730020E08Rik	15.9803	7.10823	17.6579	19.5033	20.0486	10.0148	0.27567	0.696537	NA	13.5822	16.5222
A730020M07Rik	0.799017	1.18471	5.51809	1.02649	2.22762	3.00444	0.219183	0.892751	NA	2.5006	2.08618
A730043L09Rik	6.39213	5.92353	5.51809	9.23838	7.79668	4.00592	0.21091	0.832227	NA	5.94458	7.01366
A730046J19Rik	3.19607	3.55412	8.82895	6.15892	14.4795	10.0148	1.15368	0.291972	NA	5.19304	10.2178
A730056A06Rik	3.99508	1.18471	3.31085	3.07946	3.34143	3.00444	0.164583	0.907566	NA	2.83021	3.14178
A730085K08Rik	2.39705	0	3.31085	2.05297	4.45524	4.00592	0.953407	0.572107	NA	1.90263	3.50471
A730090N16Rik	0	7.10823	5.51809	5.13243	2.22762	2.00296	-0.351106	0.80514	NA	4.20877	3.12101
A830009L08Rik	3.19607	0	0	1.02649	1.11381	0	-0.210433	0.943335	NA	1.06536	0.713433
A830010M20Rik	83.8967	74.6364	91.6003	88.2779	76.853	82.1214	-0.0150263	0.959251	NA	83.3778	82.4174
A830018L16Rik	92.6859	117.286	105.947	195.033	129.202	122.181	0.48747	0.13761	NA	105.306	148.805
A830052D11Rik	2.39705	3.55412	5.51809	9.23838	5.56906	5.0074	0.847607	0.476555	NA	3.82309	6.60495
A830080D01Rik	147.019	119.655	174.372	194.006	213.852	149.221	0.336454	0.135098	NA	147.015	185.693
A830082K12Rik	7.19115	10.6623	14.347	3.07946	20.0486	6.00889	-0.348067	0.688234	NA	10.7335	9.71232
A830082N09Rik	29.5636	31.987	37.523	54.4038	54.5767	58.0859	0.761348	0.0637205	NA	33.0246	55.6888
A930001A20Rik	5.59312	2.36941	7.72533	5.13243	18.9348	3.00444	0.415425	0.680292	NA	5.22929	9.02389
A930003O13Rik	0.799017	1.18471	1.10362	2.05297	1.11381	1.00148	0.35428	0.873334	NA	1.02911	1.38942
A930004D18Rik	7.19115	9.47764	6.62171	8.2119	8.91049	10.0148	0.231153	0.792044	NA	7.7635	9.04573
A930005H10Rik	34.3577	29.6176	29.7977	50.2979	53.4629	25.037	0.409467	0.379087	NA	31.2577	42.9326
A930006K02Rik	8.78918	5.92353	9.93256	13.3443	11.1381	5.0074	0.225593	0.799793	NA	8.21509	9.82995
A930007I19Rik	4.7941	5.92353	8.82895	6.15892	7.79668	9.01333	0.266656	0.76659	NA	6.51552	7.65631
A930012L18Rik	14.3823	3.55412	11.0362	11.2914	5.56906	15.0222	0.0110489	0.989607	NA	9.65753	10.6275
A930013F10Rik	25.5685	10.6623	37.523	54.4038	50.1215	44.0652	1.07265	0.0218645	NA	24.5846	49.5302
A930015D03Rik	28.7646	28.4329	34.2122	45.1654	37.8696	35.0518	0.373425	0.402793	NA	30.4699	39.3623
A930016O22Rik	5.59312	4.73882	5.51809	8.2119	1.11381	4.00592	-0.362825	0.742873	NA	5.28334	4.44388
A930017M01Rik	84.6958	112.547	60.699	82.119	62.3734	92.1362	-0.122554	0.7037	NA	85.9806	78.8762
A930018P22Rik	1.59803	0	2.20724	0	1.11381	0	-1.78227	0.50116	NA	1.26842	0.37127
A930019D19Rik	28.7646	10.6623	27.5905	35.927	20.0486	25.037	0.276793	0.627905	NA	22.3391	27.0042
A930024E05Rik	16.7793	16.5859	25.3832	23.6092	25.6177	18.0267	0.219456	0.694669	NA	19.5828	22.4178
A930041C12Rik	2.39705	1.18471	6.62171	4.10595	2.22762	2.00296	-0.0585348	0.966075	NA	3.40115	2.77884
AA388235	7.99017	5.92353	6.62171	16.4238	10.0243	8.01185	0.738947	0.389459	NA	6.84513	11.4866
AA413626	1.59803	2.36941	2.20724	8.2119	3.34143	0	0.793076	0.600683	NA	2.05823	3.85111
AA414768	7.19115	7.10823	9.93256	10.2649	10.0243	7.01037	0.182563	0.824319	NA	8.07732	9.09985
AA415398	39.1518	40.28	54.0773	53.3773	40.0972	50.074	0.113337	0.772223	NA	44.503	47.8495
AA465934	9.5882	3.55412	7.72533	5.13243	7.79668	8.01185	0.00556845	0.995491	NA	6.95588	6.98032
AA467197	1.59803	0	0	3.07946	1.11381	1.00148	1.71052	0.48485	NA	0.532678	1.73158
AA474331	22.3725	21.3247	29.7977	27.7151	25.6177	24.0355	0.087567	0.864542	NA	24.4983	25.7894
AA543186	23.9705	20.14	13.2434	11.2914	18.9348	12.0178	-0.465671	0.492041	NA	19.118	14.0813
AA986860	261.278	317.501	243.9	252.516	174.868	296.438	-0.215007	0.243966	NA	274.226	241.274
Aaas	127.044	123.209	129.123	133.443	99.1292	124.184	-0.0981423	0.692219	NA	126.459	118.919
Aacs	234.112	321.055	130.227	217.615	257.29	263.389	0.175978	0.453972	NA	228.465	246.098
Aaed1	365.151	428.863	428.204	370.562	394.289	349.517	-0.131456	0.454075	NA	407.406	371.456
Aagab	795.022	743.995	781.362	707.25	800.83	781.155	-0.0191165	0.892012	0.966089	773.459	763.078
Aak1	1601.23	1458.37	2020.72	1580.79	1658.46	1668.47	-0.0370108	0.760404	0.948639	1693.44	1635.91
Aamdc	289.244	308.023	263.765	253.542	285.136	268.397	-0.0914805	0.631466	NA	287.011	269.025
Aamp	1738.66	1848.14	1307.79	1300.56	1268.63	1755.6	-0.179995	0.139107	0.622319	1631.53	1441.6
Aanat	6.39213	0	2.20724	7.18541	6.68287	2.00296	0.849891	0.551299	NA	2.86646	5.29041
Aar2	397.91	437.156	341.018	347.979	386.492	409.606	-0.0344666	0.836694	NA	392.028	381.359
Aars	1844.13	1543.67	1601.35	1914.4	1241.9	2313.42	0.0818808	0.663348	0.925095	1663.05	1823.24
Aars2	95.882	135.056	55.1809	91.3573	89.1049	99.1466	0.0408271	0.893969	NA	95.3731	93.203
Aarsd1	263.675	279.591	205.273	238.145	212.738	264.391	-0.0609755	0.7607	NA	249.513	238.425
Aasdh	156.607	136.241	189.822	192.98	179.324	225.333	0.308042	0.149467	NA	160.89	199.212
Aasdhppt	378.734	501.13	467.934	468.078	492.305	424.628	0.0406842	0.807984	NA	449.266	461.67
Aass	1435.03	1544.86	2145.43	1638.27	1229.65	1620.4	-0.180373	0.131474	0.61878	1708.44	1496.11
Aatf	235.71	229.833	279.215	244.304	198.258	241.357	-0.122722	0.512365	NA	248.253	227.973
Aatk	27.1666	41.4647	13.2434	31.8211	25.6177	23.0341	0.0899919	0.867651	NA	27.2916	26.8243
AB124611	57.5292	24.8788	23.176	55.4303	109.153	14.0207	0.474891	0.346024	NA	35.1947	59.5348
Abat	220.529	190.738	274.801	203.244	165.958	211.312	-0.242701	0.256999	NA	228.689	193.505
Abca1	1448.62	1665.7	1537.34	1556.15	1891.25	1508.23	0.0856098	0.608988	0.908566	1550.55	1651.88
Abca13	5.59312	0	2.20724	4.10595	3.34143	2.00296	0.254559	0.886319	NA	2.60012	3.15011
Abca17	0.799017	4.73882	0	1.02649	1.11381	2.00296	0.0818198	0.967909	NA	1.84595	1.38109
Abca2	336.386	360.15	264.868	343.873	310.753	350.518	0.0722595	0.676617	NA	320.468	335.048
Abca3	2185.31	2121.81	2143.23	1980.09	1638.42	2352.48	-0.131944	0.240565	0.722614	2150.11	1990.33
Abca4	7.99017	10.6623	8.82895	6.15892	6.68287	9.01333	-0.350106	0.713356	NA	9.16049	7.28504
Abca5	214.136	226.279	262.661	242.251	237.242	244.361	0.0491369	0.796146	NA	234.359	241.285
Abca6	135.833	172.967	156.714	159.105	140.34	135.2	-0.0954601	0.700407	NA	155.171	144.882
Abca7	303.626	302.1	247.21	269.966	241.697	317.469	-0.0462204	0.806633	NA	284.312	276.378
Abca8a	965.212	1181.15	1019.74	928.971	885.48	1000.48	-0.170466	0.203444	0.695388	1055.37	938.31
Abca8b	208.543	244.049	211.895	230.96	192.689	242.358	-0.00254761	0.989702	NA	221.496	222.002
Abca9	491.395	606.569	486.696	414.701	458.89	416.616	-0.294231	0.0951425	NA	528.22	430.069
Abcb10	512.17	595.907	510.975	534.8	544.654	517.766	-0.0185802	0.907484	NA	539.684	532.406
Abcb11	7.19115	8.29294	5.51809	8.2119	5.56906	6.00889	-0.068883	0.940465	NA	7.00073	6.59661
Abcb1a	43.1469	43.8341	37.523	57.4833	67.9425	33.0489	0.305653	0.493891	NA	41.5013	52.8249
Abcb1b	35.1567	58.0506	29.7977	52.3508	82.422	24.0355	0.224501	0.607681	NA	41.0017	52.9361
Abcb4	3.19607	16.5859	2.20724	7.18541	11.1381	7.01037	0.262842	0.807138	NA	7.32973	8.44463
Abcb6	483.405	516.532	477.867	535.826	379.81	505.748	-0.0676982	0.664444	NA	492.601	473.795
Abcb7	1070.68	1274.74	1305.58	1080.89	1343.26	1067.58	-0.0672537	0.611736	0.910387	1217	1163.91
Abcb8	266.872	375.552	205.273	217.615	262.859	245.363	-0.193028	0.349384	NA	282.565	241.946
Abcb9	66.3184	67.5282	41.9375	55.4303	62.3734	69.1022	0.116451	0.739459	NA	58.5947	62.302
Abcc1	734.296	672.913	573.881	691.852	633.759	790.168	0.0909061	0.559951	0.891327	660.364	705.26
Abcc10	116.656	110.178	102.636	138.576	103.584	145.215	0.215921	0.40417	NA	109.824	129.125
Abcc2	2.39705	1.18471	2.20724	4.10595	6.68287	1.00148	0.693968	0.677116	NA	1.92966	3.9301
Abcc3	89.4899	81.7447	90.4967	78.013	66.8287	87.1288	-0.181148	0.626589	NA	87.2437	77.3235
Abcc4	191.764	187.183	195.34	199.138	197.145	204.302	0.0671758	0.793424	NA	191.429	200.195
Abcc5	148.617	114.916	154.507	162.185	183.779	134.198	0.192934	0.429448	NA	139.347	160.054
Abcc6	0.799017	2.36941	2.20724	2.05297	0	1.00148	-1.06274	0.66436	NA	1.79189	1.01815
Abcc8	3.19607	1.18471	1.10362	3.07946	0	0	-0.712757	0.740266	NA	1.82813	1.02649
Abcc9	209.342	156.381	156.714	291.522	415.452	159.235	0.644194	0.00790316	NA	174.146	288.736
Abcd1	206.146	210.878	171.061	201.191	181.551	194.287	-0.024634	0.906298	NA	196.028	192.343
Abcd2	74.3085	163.489	66.2171	125.231	292.932	87.1288	0.507258	0.487304	NA	101.338	168.431
Abcd3	2456.18	3126.44	3404.66	2783.83	2578.47	3007.45	-0.097603	0.42501	0.843486	2995.76	2789.92
Abcd4	58.3282	49.7576	56.2845	56.4568	60.1458	80.1185	0.244451	0.484327	NA	54.7901	65.5737
Abce1	2197.3	2455.89	2388.23	2531.32	2525.01	2518.72	0.105202	0.490601	0.858636	2347.14	2525.02
Abcf1	1525.32	1427.57	1279.09	1309.8	954.536	1501.22	-0.195012	0.128511	0.613652	1410.66	1255.18
Abcf2	763.061	868.389	699.694	770.892	589.206	832.231	-0.100346	0.503165	0.859208	777.048	730.776
Abcf3	849.355	875.497	860.822	919.732	791.92	1054.56	0.0859646	0.50051	0.858636	861.891	922.071
Abcg1	777.443	866.02	648.928	633.342	705.042	676	-0.178822	0.252983	NA	764.13	671.462
Abcg2	117.455	132.687	93.8075	113.94	191.576	105.156	0.218935	0.46199	NA	114.65	136.89
Abcg3	79.9017	14.2165	20.9687	78.013	140.34	16.0237	0.812045	0.137859	NA	38.3623	78.1256
Abcg4	10.3872	10.6623	9.93256	7.18541	5.56906	11.0163	-0.436873	0.60052	NA	10.3274	7.92359
Abcg8	1.59803	3.55412	1.10362	2.05297	0	0	-1.51396	0.51392	NA	2.08526	0.684325
Abhd1	2.39705	1.18471	2.20724	2.05297	3.34143	6.00889	0.907858	0.547382	NA	1.92966	3.8011
Abhd10	103.073	104.254	130.227	162.185	105.812	131.194	0.241937	0.35819	NA	112.518	133.064
Abhd11	290.043	347.119	305.702	298.708	272.884	352.521	-0.0376272	0.83446	NA	314.288	308.038
Abhd11os	83.8967	90.0376	56.2845	64.6687	57.9182	60.0889	-0.304844	0.354733	NA	76.7396	60.8919
Abhd12	1094.65	1248.68	1146.66	1083.97	1057.01	1231.82	-0.0521993	0.709787	0.935859	1163.33	1124.27
Abhd13	1425.45	1529.45	1671.98	1581.82	1597.21	1568.32	0.0408943	0.716015	0.93601	1542.29	1582.45
Abhd14a	127.843	131.502	88.2895	85.1984	94.6739	92.1362	-0.332638	0.266861	NA	115.878	90.6695
Abhd14b	689.551	598.276	704.108	612.813	546.881	616.912	-0.169994	0.29175	NA	663.979	592.202
Abhd15	32.7597	77.0059	32.0049	29.7681	54.5767	25.037	-0.419208	0.43763	NA	47.2568	36.4606
Abhd16a	652.797	694.237	471.245	584.071	491.191	669.991	-0.0550116	0.692047	NA	606.093	581.751
Abhd16b	3.19607	1.18471	2.20724	5.13243	4.45524	6.00889	1.2135	0.413081	NA	2.196	5.19886
Abhd17a	240.504	267.743	125.812	206.324	178.21	190.281	-0.0692075	0.743947	NA	211.353	191.605
Abhd17b	1027.54	1172.86	1207.36	1029.57	1354.39	954.411	-0.0414557	0.753233	0.948639	1135.92	1112.79
Abhd17c	670.375	595.907	712.937	696.985	569.158	676	-0.0303467	0.835701	NA	659.74	647.381
Abhd2	728.703	683.575	774.74	605.627	522.377	717.06	-0.254475	0.228477	NA	729.006	615.022
Abhd3	75.1076	104.254	118.087	78.013	84.6496	89.1318	-0.221491	0.439834	NA	99.1496	83.9315
Abhd4	492.194	503.5	507.664	373.641	338.599	439.65	-0.394379	0.0120146	NA	501.119	383.963
Abhd5	463.43	674.097	504.354	554.303	692.791	548.812	0.123996	0.510729	NA	547.294	598.635
Abhd6	235.71	293.807	203.066	231.986	266.201	214.317	-0.034323	0.86067	NA	244.194	237.501
Abhd8	37.5538	43.8341	9.93256	22.5827	42.3248	20.0296	0.0428159	0.935892	NA	30.4402	28.3124
Abi1	1136.2	1091.11	1369.59	1243.08	1246.35	1116.65	0.0109047	0.928381	0.977538	1198.97	1202.03
Abi2	735.894	813.893	944.697	652.846	641.555	737.09	-0.289954	0.0381046	0.408783	831.495	677.164
Abi3	65.5194	46.2035	27.5905	67.7481	80.1944	40.0592	0.446635	0.242873	NA	46.4378	62.6673
Abi3bp	148.617	145.719	178.786	196.059	204.941	165.244	0.261501	0.276132	NA	157.707	188.748
Abl1	966.81	971.459	772.533	996.719	750.709	1049.55	0.0345109	0.802811	0.95087	903.6	932.327
Abl2	906.085	952.503	955.733	929.997	764.074	973.439	-0.0855407	0.490899	0.858636	938.107	889.17
Ablim1	7048.92	7189.98	7912.94	7221.34	6003.44	7273.76	-0.116075	0.47405	0.858636	7383.95	6832.84
Ablim2	25.5685	42.6494	26.4868	25.6622	28.9591	32.0474	-0.112905	0.811678	NA	31.5683	28.8896
Ablim3	27.9656	48.5729	20.9687	47.2184	64.601	31.0459	0.511237	0.357121	NA	32.5024	47.6218
Abo	246.896	290.253	281.423	211.456	181.551	257.381	-0.347584	0.0707279	NA	272.857	216.796
Abr	387.523	343.565	356.469	413.674	409.883	433.641	0.20825	0.238008	NA	362.519	419.066
Abra	5.59312	4.73882	9.93256	9.23838	7.79668	9.01333	0.424116	0.636094	NA	6.75483	8.6828
Abracl	829.379	945.395	1010.91	985.428	1210.71	811.2	0.0970241	0.464162	0.853778	928.563	1002.45
Abt1	175.784	171.782	147.885	147.814	144.795	159.235	-0.131611	0.558163	NA	165.15	150.615
Abtb1	176.583	132.687	134.641	152.947	155.934	149.221	0.0383143	0.885311	NA	147.97	152.7
Abtb2	147.019	155.196	109.258	167.317	110.267	124.184	-0.0209973	0.936293	NA	137.158	133.923
Acaa1a	469.822	553.257	357.572	354.138	421.021	459.68	-0.143973	0.38831	NA	460.217	411.613
Acaa1b	11.1862	18.9553	17.6579	13.3443	28.9591	14.0207	0.180171	0.789216	NA	15.9331	18.7747
Acaa2	603.258	1711.9	571.674	772.945	1264.18	939.389	0.0781223	0.897075	0.966602	962.277	992.17
Acaca	421.082	927.624	519.804	746.256	1965.88	982.453	0.874832	0.175501	0.662769	622.837	1231.53
Acacb	1500.55	2279.37	1674.19	1438.11	1406.74	1694.51	-0.263888	0.0801712	0.54579	1818.04	1513.12
Acad10	156.607	188.368	151.196	163.211	128.088	209.31	-0.0158992	0.94845	NA	165.39	166.87
Acad11	1015.55	1363.6	1020.85	971.057	1011.34	1242.84	-0.0789829	0.624497	0.915542	1133.33	1075.08
Acad12	75.1076	74.6364	67.3207	65.6952	83.5358	72.1066	0.0238988	0.944957	NA	72.3549	73.7792
Acad8	413.891	417.016	490.006	396.224	329.688	409.606	-0.222124	0.200113	NA	440.304	378.506
Acad9	462.631	504.685	474.556	444.469	496.76	520.77	0.0206086	0.894871	NA	480.624	487.333
Acadl	1397.48	2113.51	1510.85	1443.24	1738.66	1393.06	-0.143135	0.455972	0.853284	1673.95	1524.99
Acadm	1228.09	2612.28	1481.06	1223.57	1932.46	1397.07	-0.242567	0.598666	0.90348	1773.81	1517.7
Acads	445.052	630.263	295.77	367.482	534.629	473.7	0.0536443	0.781797	NA	457.028	458.604
Acadsb	2824.52	3143.02	3562.48	2846.45	2961.62	2892.28	-0.125741	0.343849	0.7861	3176.68	2900.12
Acadvl	1410.26	2932.15	1552.79	1439.13	1997.06	1917.84	-0.129079	0.742061	0.945738	1965.07	1784.68
Acap1	127.843	17.7706	18.7615	126.258	241.697	23.0341	1.14287	0.0241297	NA	54.7916	130.33
Acap2	1048.31	883.79	1129	1136.32	997.975	1072.59	0.0689682	0.596852	0.90348	1020.37	1068.96
Acap3	170.99	194.292	174.372	243.277	169.299	210.311	0.201008	0.345212	NA	179.884	207.629
Acat1	1710.69	2194.07	1731.58	1612.61	1971.45	1648.44	-0.110615	0.463152	0.853778	1878.78	1744.16
Acat2	168.593	248.788	143.47	164.238	220.535	181.268	0.0212992	0.935193	NA	186.95	188.68
Acat3	2.39705	5.92353	4.41447	10.2649	11.1381	10.0148	1.30339	0.193506	NA	4.24502	10.4726
Acbd3	1063.49	1178.78	1136.73	962.845	907.756	1106.64	-0.187476	0.174894	0.662329	1126.33	992.412
Acbd4	170.99	206.139	139.056	173.476	209.397	224.332	0.246525	0.278572	NA	172.061	202.402
Acbd5	1517.33	1711.9	1815.45	1516.12	1522.58	1565.31	-0.128426	0.266236	0.749135	1681.56	1534.67
Acbd6	172.588	178.891	192.03	149.867	143.682	154.228	-0.278665	0.194983	NA	181.169	149.259
Accs	57.5292	47.3882	62.9062	83.1454	89.1049	71.1051	0.535122	0.115935	NA	55.9412	81.1185
Acd	106.269	90.0376	72.8388	105.728	75.7392	104.154	0.0790763	0.784607	NA	89.7152	95.2071
Ace	528.15	597.092	471.245	579.965	405.427	576.853	-0.0438595	0.782211	NA	532.162	520.748
Ace2	6.39213	8.29294	8.82895	7.18541	3.34143	7.01037	-0.471369	0.614362	NA	7.83801	5.84574
Acer2	42.3479	68.7129	36.4194	40.033	55.6906	29.0429	-0.26523	0.574341	NA	49.1601	41.5888
Acer3	371.543	497.576	537.462	492.714	721.75	489.724	0.267089	0.131829	NA	468.86	568.063
Ache	15.9803	18.9553	3.31085	13.3443	10.0243	15.0222	0.241807	0.756283	NA	12.7488	12.7969
Acin1	1335.96	1261.71	1255.92	1234.86	945.626	1452.15	-0.111874	0.354182	0.794319	1284.53	1210.88
Ackr1	11.1862	3.55412	5.51809	6.15892	8.91049	3.00444	-0.259739	0.806166	NA	6.75281	6.02462
Ackr2	13.5833	8.29294	15.4507	16.4238	26.7315	11.0163	0.465283	0.514352	NA	12.4423	18.0572
Ackr3	93.4849	161.12	112.569	90.3309	92.4463	87.1288	-0.435757	0.138685	NA	122.391	89.9687
Ackr4	49.539	31.987	35.3158	31.8211	40.0972	34.0504	-0.14732	0.75456	NA	38.9473	35.3229
Acly	3979.9	4912.97	3648.56	3965.32	4420.72	5014.42	0.099211	0.499639	0.858636	4180.48	4466.82
Acmsd	1.59803	1.18471	3.31085	5.13243	2.22762	3.00444	0.807216	0.602025	NA	2.0312	3.45483
Acnat1	40.7498	26.0635	43.0411	43.1125	42.3248	41.0607	0.250609	0.744914	NA	36.6182	42.166
Aco1	1003.56	1113.62	954.63	950.527	887.708	1084.6	-0.0768583	0.568304	0.894999	1023.94	974.279
Aco2	5973.45	9788.04	5372.41	5550.22	5840.83	6734.96	-0.203195	0.228472	0.715452	7044.63	6042
Acot1	127.044	82.9294	122.502	103.675	73.5115	122.181	-0.173795	0.647253	NA	110.825	99.7891
Acot11	329.994	433.602	377.437	439.336	456.663	510.755	0.303579	0.0703681	NA	380.345	468.918
Acot13	541.733	578.136	589.332	523.508	702.815	494.732	-0.00275441	0.98762	NA	569.734	573.685
Acot2	50.338	75.8212	48.5592	56.4568	85.7635	49.0726	0.104287	0.770573	NA	58.2395	63.7643
Acot4	3.19607	1.18471	1.10362	3.07946	4.45524	5.0074	1.10174	0.427925	NA	1.82813	4.1807
Acot6	30.3626	31.987	39.7303	44.1389	21.1624	28.0415	-0.132935	0.783482	NA	34.0266	31.1143
Acot7	121.451	118.471	83.875	97.5163	106.926	103.153	-0.0564331	0.850039	NA	107.932	102.532
Acot8	135.034	142.165	86.0822	123.178	114.723	129.191	0.0442276	0.859834	NA	121.094	122.364
Acot9	217.333	259.451	231.76	243.277	384.265	216.32	0.211531	0.314464	NA	236.181	281.287
Acox1	2213.28	2511.58	2292.22	2297.28	2101.76	2586.83	-0.0131579	0.917338	0.974351	2339.02	2328.62
Acox2	13.5833	14.2165	9.93256	15.3973	11.1381	27.04	0.416816	0.544802	NA	12.5774	17.8585
Acox3	608.851	562.735	643.409	602.548	473.37	694.026	-0.0582924	0.690602	NA	604.998	589.981
Acoxl	1.59803	1.18471	3.31085	1.02649	1.11381	1.00148	-0.81251	0.721627	NA	2.0312	1.04726
Acp1	449.047	439.526	425.997	401.356	521.264	370.548	-0.0357408	0.825655	NA	438.19	431.056
Acp2	356.361	368.443	354.261	390.065	424.362	398.589	0.169202	0.281105	NA	359.689	404.339
Acp5	314.014	329.348	192.03	254.569	311.867	218.323	-0.0704575	0.714814	NA	278.464	261.586
Acp6	159.004	137.426	175.475	173.476	171.527	153.227	0.0820916	0.709862	NA	157.302	166.077
Acpp	6172.4	5466.23	8969.11	5212.5	5263.87	5504.14	-0.338333	0.0567444	0.484875	6869.25	5326.84
Acpt	64.7203	23.6941	76.1497	46.1919	45.6663	50.074	-0.187657	0.67708	NA	54.8547	47.3107
Acrbp	44.7449	17.7706	48.5592	52.3508	45.6663	54.08	0.460144	0.303728	NA	37.0249	50.699
Acrv1	0.799017	0	3.31085	2.05297	0	1.00148	-0.0360332	0.989694	NA	1.36996	1.01815
Acsbg1	12.7843	16.5859	4.41447	15.3973	14.4795	8.01185	0.297401	0.695924	NA	11.2615	12.6296
Acsf2	620.037	580.506	612.508	588.177	473.37	586.868	-0.148817	0.415597	NA	604.35	549.472
Acsf3	170.99	217.986	112.569	177.582	152.592	222.329	0.160037	0.506956	NA	167.181	184.168
Acsl1	2086.23	3849.11	1898.22	2189.5	2931.55	2665.94	-0.00205748	0.996471	0.999447	2611.19	2595.66
Acsl3	1116.23	1242.76	1509.75	971.057	1140.54	1168.73	-0.224903	0.151866	0.638646	1289.58	1093.44
Acsl4	956.423	847.064	1318.82	885.858	1008	849.256	-0.160535	0.381886	0.812832	1040.77	914.371
Acsl5	2001.54	2288.85	3372.66	2043.74	2633.05	1973.92	-0.182132	0.201619	0.695388	2554.35	2216.9
Acsl6	43.1469	58.0506	41.9375	40.033	56.8044	66.0977	0.193059	0.608852	NA	47.7117	54.3117
Acsm1	615.243	576.952	586.021	407.515	485.622	459.68	-0.397014	0.0798373	NA	592.739	450.939
Acsm2	0	0	2.20724	0	2.22762	0	0.00376377	0.998922	NA	0.735745	0.742541
Acsm3	335.587	388.583	321.153	333.608	375.354	348.515	0.0193262	0.932255	NA	348.441	352.493
Acsm4	0	1.18471	3.31085	2.05297	0	0	-0.431089	0.860112	NA	1.49852	0.684325
Acsm5	7.19115	4.73882	6.62171	8.2119	5.56906	7.01037	0.144934	0.876103	NA	6.18389	6.93044
Acss1	5713.77	5596.55	6460.58	5667.23	4670.21	5683.4	-0.153167	0.265052	0.749135	5923.63	5340.28
Acss2	968.408	979.751	1020.85	1037.78	1040.3	1151.7	0.119697	0.418052	0.840383	989.669	1076.59
Acss2os	0.799017	0	6.62171	10.2649	11.1381	6.00889	2.55457	0.0288463	NA	2.47358	9.13729
Acss3	35.9557	61.6047	41.9375	43.1125	82.422	52.077	0.306895	0.569421	NA	46.4993	59.2038
Acta1	29.5636	215.616	22.0724	17.4503	108.04	40.0592	-0.553217	0.569269	NA	89.0841	55.1831
Acta2	5984.63	7893.69	5458.5	4973.33	3712.33	7105.51	-0.333969	0.00925354	0.199141	6445.61	5263.72
Actb	18907.9	18843.9	12985.2	15026.7	14959.6	14849	-0.1582	0.283482	0.754432	16912.3	14945.1
Actbl2	1.59803	3.55412	3.31085	3.07946	3.34143	3.00444	0.185343	0.882395	NA	2.821	3.14178
Actc1	0.799017	5.92353	2.20724	0	2.22762	5.0074	-0.391101	0.844187	NA	2.97659	2.41168
Actg1	2177.32	2215.4	1812.14	2030.39	1881.23	2419.58	0.0246282	0.86488	0.965005	2068.29	2110.4
Actg2	220.529	263.005	206.377	152.947	133.657	304.45	-0.308854	0.153643	NA	229.97	197.018
Actl6a	406.699	427.679	361.987	393.145	427.703	440.652	0.0789715	0.66629	NA	398.788	420.5
Actl6b	6.39213	3.55412	6.62171	5.13243	1.11381	4.00592	-0.896439	0.457056	NA	5.52265	3.41739
Actl7a	0.799017	1.18471	1.10362	9.23838	1.11381	3.00444	2.04504	0.20747	NA	1.02911	4.45221
Actn1	830.178	864.835	682.036	843.772	670.514	904.337	0.0182583	0.889598	0.965313	792.35	806.208
Actn2	2.39705	7.10823	3.31085	8.2119	16.7072	6.00889	1.14799	0.252264	NA	4.27205	10.3093
Actn3	1.59803	52.127	2.20724	5.13243	30.0729	1.00148	-1.24211	0.293835	NA	18.6441	12.0689
Actn4	2100.61	2278.19	1739.3	1967.78	1512.56	2099.1	-0.140503	0.298472	0.7612	2039.37	1859.81
Actr10	905.286	1011.74	1000.98	926.918	1102.67	889.315	-0.00301589	0.9814	0.994518	972.669	972.969
Actr1a	1170.56	1284.22	999.878	1030.59	1071.49	1272.88	-0.0323342	0.798971	0.95087	1151.55	1124.99
Actr1b	994.776	1036.62	802.33	845.825	769.644	1001.48	-0.117154	0.381505	0.812832	944.575	872.317
Actr2	3540.44	3821.86	4086.7	3222.14	3342.55	3242.8	-0.220336	0.0590901	0.4873	3816.33	3269.16
Actr3	1721.88	1741.52	1688.54	1716.29	2034.93	1467.17	0.00808636	0.942605	0.984718	1717.31	1739.46
Actr3b	23.9705	23.6941	18.7615	13.3443	25.6177	27.04	-0.00993657	0.986054	NA	22.142	22.0007
Actr5	90.2889	78.1906	91.6003	101.622	101.357	97.1437	0.203949	0.478614	NA	86.6933	100.041
Actr6	139.828	144.534	153.403	137.549	206.055	115.17	0.0318328	0.891666	NA	145.922	152.925
Actr8	489.797	542.595	560.638	510.164	503.443	619.917	0.0325737	0.82571	NA	531.01	544.508
Acvr1	189.367	183.629	199.755	182.715	212.738	185.274	0.0187149	0.929631	NA	190.917	193.576
Acvr1b	371.543	375.552	382.956	344.9	277.339	393.582	-0.171454	0.28915	NA	376.683	338.607
Acvr1c	19.1764	139.795	12.1398	30.7946	142.568	41.0607	0.0572992	0.969032	NA	57.0372	71.4744
Acvr2a	512.969	605.385	699.694	630.263	566.93	590.874	-0.0140267	0.922834	NA	606.016	596.022
Acvr2b	20.7744	11.8471	6.62171	15.3973	7.79668	12.0178	-0.104699	0.891553	NA	13.0811	11.7373
Acvrl1	177.382	169.413	114.776	126.258	159.275	123.182	-0.15816	0.500415	NA	153.857	136.238
Acy1	204.548	150.458	108.155	158.079	141.454	198.293	0.123113	0.716091	NA	154.387	165.942
Acy3	105.47	93.5917	119.191	102.649	103.584	133.197	0.0852653	0.780404	NA	106.084	113.143
Acyp1	102.274	104.254	82.7714	113.94	171.527	91.1348	0.34427	0.222341	NA	96.4332	125.534
Acyp2	26.3675	75.8212	44.1447	39.0065	106.926	44.0652	0.249406	0.588124	NA	48.7778	63.3325
Ada	93.4849	87.6682	78.3569	71.8541	86.8773	71.1051	-0.175884	0.594454	NA	86.5034	76.6122
Adal	170.99	161.12	182.097	179.635	188.234	188.278	0.114547	0.595864	NA	171.402	185.383
Adam10	1384.7	1267.63	1681.91	1451.45	1803.26	1297.92	0.0703086	0.544569	0.885192	1444.75	1517.54
Adam11	15.1813	9.47764	7.72533	12.3178	27.8453	12.0178	0.627298	0.405866	NA	10.7948	17.3936
Adam12	8.78918	58.0506	18.7615	28.7416	45.6663	18.0267	-0.0760436	0.920967	NA	28.5338	30.8115
Adam15	901.291	1131.39	634.58	704.17	707.27	963.425	-0.147745	0.292541	0.760912	889.088	791.622
Adam17	581.684	542.595	568.363	590.23	618.165	541.801	0.0470163	0.747253	NA	564.214	583.399
Adam19	131.838	77.0059	96.0148	152.947	171.527	77.114	0.344864	0.264694	NA	101.619	133.863
Adam1a	35.9557	42.6494	43.0411	54.4038	43.4386	49.0726	0.273916	0.480856	NA	40.5488	48.9717
Adam1b	3.99508	1.18471	5.51809	8.2119	6.68287	10.0148	1.23777	0.21752	NA	3.56596	8.30319
Adam21	2.39705	1.18471	4.41447	3.07946	5.56906	3.00444	0.642596	0.637934	NA	2.66541	3.88432
Adam22	39.1518	49.7576	50.7664	79.0395	75.7392	53.0785	0.571089	0.124441	NA	46.5586	69.2857
Adam23	120.652	85.2988	109.258	118.046	161.503	104.154	0.263503	0.346997	NA	105.07	127.901
Adam28	125.446	81.7447	160.025	108.808	135.885	168.249	0.205628	0.556619	NA	122.405	137.647
Adam32	3.99508	1.18471	6.62171	3.07946	1.11381	2.00296	-0.834251	0.566515	NA	3.93383	2.06541
Adam33	12.7843	4.73882	8.82895	22.5827	32.3005	14.0207	1.30362	0.0700404	NA	8.78401	22.968
Adam4	19.9754	20.14	35.3158	21.5562	18.9348	27.04	-0.115978	0.822748	NA	25.1437	22.5103
Adam5	1.59803	0	3.31085	4.10595	2.22762	0	0.504442	0.820954	NA	1.6363	2.11119
Adam8	36.7548	30.8023	24.2796	58.5098	54.5767	31.0459	0.646485	0.170437	NA	30.6122	48.0441
Adam9	2397.05	2210.66	2555.98	2034.5	2073.92	2755.07	-0.0678471	0.697936	0.931965	2387.9	2287.83
Adamdec1	41.5489	17.7706	29.7977	29.7681	33.4143	39.0578	0.186459	0.720344	NA	29.7057	34.0801
Adamts1	63.1223	119.655	100.429	86.2249	89.1049	124.184	0.0774468	0.833731	NA	94.4023	99.8378
Adamts10	246.097	189.553	205.273	404.436	289.591	322.477	0.656947	0.00508314	NA	213.641	338.835
Adamts12	111.063	119.655	207.48	161.158	121.405	159.235	0.0556631	0.821297	NA	146.066	147.266
Adamts13	4.7941	1.18471	2.20724	0	5.56906	0	-2.00601	0.29068	NA	2.72868	1.85635
Adamts14	11.1862	13.0318	13.2434	20.5297	14.4795	24.0355	0.62545	0.325281	NA	12.4871	19.6816
Adamts15	114.259	107.808	214.102	90.3309	70.1701	105.156	-0.670897	0.0204663	NA	145.39	88.5522
Adamts16	0.799017	0	4.41447	7.18541	1.11381	1.00148	1.63518	0.449967	NA	1.73783	3.10023
Adamts17	60.7253	67.5282	73.9424	66.7217	55.6906	77.114	-0.0268998	0.934983	NA	67.3986	66.5087
Adamts18	11.9852	21.3247	33.1085	22.5827	11.1381	22.0326	-0.220259	0.712951	NA	22.1395	18.5845
Adamts2	924.462	928.809	889.516	990.56	676.083	1054.56	-0.0425843	0.788703	0.95087	914.263	907.068
Adamts20	12.7843	16.5859	15.4507	16.4238	30.0729	16.0237	0.412025	0.540388	NA	14.9403	20.8401
Adamts3	10.3872	14.2165	5.51809	11.2914	13.3657	18.0267	0.548606	0.479916	NA	10.0406	14.2279
Adamts4	4.7941	1.18471	4.41447	1.02649	0	1.00148	-2.51542	0.213551	NA	3.46443	0.675989
Adamts5	119.852	164.674	217.413	168.344	211.624	119.176	-0.0156335	0.957879	NA	167.313	166.381
Adamts6	35.1567	8.29294	19.8651	54.4038	89.1049	15.0222	1.087	0.0572172	NA	21.1049	52.8436
Adamts7	20.7744	10.6623	15.4507	19.5033	8.91049	23.0341	0.00917438	0.988827	NA	15.6291	17.1493
Adamts8	11.1862	15.4012	7.72533	8.2119	8.91049	9.01333	-0.343328	0.676686	NA	11.4376	8.7119
Adamts9	103.872	107.808	156.714	125.231	82.422	126.187	-0.139305	0.598214	NA	122.798	111.28
Adamtsl1	50.338	48.5729	75.046	96.4898	55.6906	54.08	0.273847	0.514335	NA	57.9857	68.7534
Adamtsl2	66.3184	78.1906	75.046	47.2184	21.1624	57.0844	-0.921553	0.012061	NA	73.185	41.8217
Adamtsl3	149.416	157.566	153.403	153.973	132.544	144.213	-0.0976127	0.759234	NA	153.462	143.577
Adamtsl4	50.338	43.8341	27.5905	62.6157	43.4386	49.0726	0.386314	0.402592	NA	40.5875	51.709
Adamtsl5	43.9459	40.28	18.7615	36.9535	33.4143	48.0711	0.244877	0.589501	NA	34.3291	39.4797
Adap1	40.7498	21.3247	13.2434	39.0065	56.8044	13.0193	0.46957	0.38053	NA	25.106	36.2767
Adap2	99.8771	79.3753	101.533	79.0395	75.7392	87.1288	-0.223347	0.473099	NA	93.5951	80.6358
Adar	707.929	663.435	609.197	705.197	588.092	733.084	0.0249578	0.857118	NA	660.187	675.458
Adarb1	131.838	149.273	68.4243	124.205	76.853	105.156	-0.142288	0.628976	NA	116.512	102.071
Adat1	64.7203	61.6047	66.2171	84.1719	60.1458	65.0963	0.116559	0.729235	NA	64.1807	69.8047
Adat2	29.5636	30.8023	20.9687	26.6887	33.4143	26.0385	0.0936525	0.848073	NA	27.1116	28.7138
Adat3	11.9852	4.73882	8.82895	22.5827	8.91049	18.0267	0.861241	0.258515	NA	8.51767	16.5066
Adck1	202.151	236.941	172.164	176.556	158.161	222.329	-0.140738	0.497045	NA	203.752	185.682
Adck2	209.342	202.585	232.863	181.688	193.803	228.338	-0.0962736	0.634918	NA	214.93	201.276
Adck3	321.205	707.269	344.329	393.145	618.165	418.619	0.0542088	0.919178	NA	457.601	476.643
Adck4	123.049	119.655	78.3569	124.205	105.812	125.185	0.163746	0.528128	NA	107.02	118.401
Adck5	130.24	143.349	134.641	144.735	143.682	150.222	0.104513	0.659574	NA	136.077	146.213
Adcy1	7.19115	2.36941	7.72533	5.13243	6.68287	9.01333	0.22623	0.833196	NA	5.76196	6.94288
Adcy10	3.19607	3.55412	3.31085	10.2649	10.0243	4.00592	1.16995	0.322406	NA	3.35368	8.09836
Adcy2	131.838	111.362	155.61	120.099	104.698	135.2	-0.144248	0.600256	NA	132.937	119.999
Adcy3	81.4997	144.534	87.1858	83.1454	114.723	90.1333	-0.123019	0.707196	NA	104.407	96.0004
Adcy4	44.7449	27.2482	18.7615	45.1654	60.1458	29.0429	0.567307	0.199149	NA	30.2516	44.7847
Adcy5	135.833	158.751	115.88	108.808	103.584	149.221	-0.192589	0.439822	NA	136.821	120.538
Adcy6	2188.51	2303.07	2302.15	2008.84	1568.25	2475.66	-0.194001	0.113733	0.592459	2264.57	2017.58
Adcy7	455.439	265.374	316.738	594.336	627.076	333.493	0.55255	0.0218924	NA	345.851	518.302
Adcy8	1339.15	1331.61	891.724	996.719	948.967	1243.84	-0.147726	0.421897	0.842187	1187.49	1063.18
Adcy9	1178.55	1402.69	1161.01	1181.49	772.985	1396.06	-0.201736	0.113473	0.592459	1247.42	1116.85
Adcyap1	1.59803	2.36941	3.31085	0	3.34143	2.00296	-0.462399	0.782464	NA	2.4261	1.78147
Adcyap1r1	91.8869	60.42	82.7714	79.0395	85.7635	76.1126	0.0324443	0.917359	NA	78.3594	80.3052
Add1	1951.2	1807.86	1804.42	1738.87	1636.19	1808.67	-0.104864	0.388465	0.819716	1854.49	1727.91
Add2	18.3774	22.5094	22.0724	31.8211	12.2519	38.0563	0.238822	0.665011	NA	20.9864	27.3764
Add3	1500.55	1399.14	1588.11	1380.63	1327.66	1295.92	-0.163421	0.205082	0.695388	1495.93	1334.73
Adgb	7.19115	8.29294	5.51809	3.07946	12.2519	1.00148	-1.01452	0.355728	NA	7.00073	5.44429
Adgra1	0	0	2.20724	0	0	2.00296	0.00687421	0.998043	NA	0.735745	0.667654
Adgra2	799.017	799.676	857.511	685.693	609.255	818.21	-0.228183	0.0845601	0.546683	818.735	704.386
Adgra3	81.4997	84.1141	79.4605	63.6422	62.3734	64.0948	-0.366208	0.242728	NA	81.6914	63.3701
Adgrb1	3.19607	2.36941	0	2.05297	0	1.00148	-0.480128	0.860643	NA	1.85516	1.01815
Adgrb2	11.1862	11.8471	12.1398	20.5297	13.3657	12.0178	0.387711	0.57276	NA	11.7244	15.3044
Adgrb3	3.99508	2.36941	3.31085	4.10595	1.11381	4.00592	-0.249559	0.873843	NA	3.22512	3.07523
Adgrd1	36.7548	40.28	46.352	40.033	34.5281	35.0518	-0.164616	0.704908	NA	41.1289	36.5377
Adgre1	322.004	361.335	360.883	317.184	279.567	286.424	-0.242324	0.201603	NA	348.074	294.392
Adgre4	23.9705	17.7706	9.93256	23.6092	46.7801	2.00296	0.029377	0.968175	NA	17.2245	24.1307
Adgre5	447.449	406.354	354.261	470.131	542.426	346.512	0.15623	0.353453	NA	402.688	453.023
Adgrf1	9.5882	5.92353	22.0724	6.15892	4.45524	11.0163	-0.798708	0.371682	NA	12.528	7.21015
Adgrf2	3.99508	1.18471	3.31085	6.15892	1.11381	8.01185	0.482762	0.704675	NA	2.83021	5.09486
Adgrf3	0.799017	1.18471	3.31085	0	2.22762	3.00444	0.231604	0.894405	NA	1.76486	1.74402
Adgrf4	6.39213	9.47764	9.93256	10.2649	4.45524	15.0222	0.0514692	0.949126	NA	8.60078	9.91411
Adgrf5	463.43	646.849	624.648	524.535	554.678	527.78	-0.104997	0.551933	NA	578.309	535.664
Adgrg1	1625.2	1499.84	1553.89	1285.16	1122.72	1519.25	-0.269654	0.0708353	0.515195	1559.64	1309.04
Adgrg2	86.2938	66.3435	104.844	88.2779	112.495	109.161	0.287217	0.38392	NA	85.827	103.311
Adgrg3	11.1862	5.92353	22.0724	21.5562	20.0486	13.0193	0.59031	0.406722	NA	13.0607	18.208
Adgrg5	15.9803	2.36941	6.62171	36.9535	55.6906	5.0074	1.6635	0.0371706	NA	8.32382	32.5505
Adgrg6	524.954	534.302	721.766	606.654	406.541	538.797	-0.193935	0.259172	NA	593.674	517.331
Adgrl1	381.131	392.138	292.459	393.145	255.063	453.671	0.0140462	0.932092	NA	355.242	367.293
Adgrl2	395.513	395.692	478.97	421.886	318.55	409.606	-0.144857	0.431243	NA	423.392	383.347
Adgrl3	83.0977	73.4517	84.9786	89.3044	79.0806	86.1274	0.0755545	0.828387	NA	80.5094	84.8374
Adgrl4	141.426	167.043	171.061	170.397	216.079	155.23	0.168591	0.447829	NA	159.843	180.569
Adgrv1	17.5784	5.92353	22.0724	23.6092	17.821	20.0296	0.482863	0.476833	NA	15.1914	20.4866
Adh1	1216.1	1030.69	618.026	958.739	1012.45	1249.85	0.201504	0.257745	0.744583	954.941	1073.68
Adh5	881.315	1025.96	839.853	847.878	920.008	912.349	-0.0329464	0.81371	0.955491	915.708	893.412
Adh6a	36.7548	20.14	47.4556	25.6622	41.211	47.0696	0.150809	0.738863	NA	34.7834	37.9809
Adh7	11.1862	13.0318	4.41447	11.2914	15.5934	11.0163	0.505181	0.57035	NA	9.54416	12.6337
Adhfe1	197.357	306.839	273.697	323.343	265.087	249.369	0.114418	0.728027	NA	259.298	279.266
Adi1	766.257	661.066	752.668	760.627	840.927	672.995	0.0579039	0.718725	0.93601	726.663	758.183
Adig	3.99508	98.3306	9.93256	8.2119	116.95	20.0296	-0.0665343	0.96425	NA	37.4194	48.3972
Adipoq	92.6859	661.066	102.636	126.258	571.385	125.185	-0.537649	0.689119	NA	285.463	274.276
Adipor1	2206.88	2384.81	2060.46	2041.68	2207.57	2123.14	-0.0607218	0.583896	0.899202	2217.38	2124.13
Adipor2	1880.89	2391.92	1825.38	1722.45	1970.33	1871.77	-0.130232	0.373337	0.804544	2032.73	1854.85
Adk	766.257	957.242	831.025	711.355	756.278	743.099	-0.206974	0.140991	0.623345	851.508	736.911
Adm	153.411	159.935	147.885	133.443	119.178	104.154	-0.369971	0.126635	NA	153.744	118.925
Adm2	19.9754	4.73882	5.51809	21.5562	17.821	30.0444	1.22382	0.139005	NA	10.0774	23.1405
Adnp	7.99017	3.55412	14.347	3.07946	8.91049	7.01037	-0.32612	0.737273	NA	8.63044	6.33344
Adnp2	304.425	331.718	307.909	321.29	297.388	287.425	-0.058227	0.741489	NA	314.684	302.034
Ado	584.081	650.403	609.197	566.621	495.646	579.857	-0.170742	0.249626	NA	614.561	547.375
Adora1	321.205	403.985	305.702	325.396	239.469	308.456	-0.242158	0.240595	NA	343.631	291.107
Adora2a	11.9852	5.92353	4.41447	16.4238	26.7315	8.01185	1.1295	0.153311	NA	7.44108	17.0557
Adora2b	7.19115	3.55412	5.51809	2.05297	2.22762	11.0163	-0.45467	0.694403	NA	5.42112	5.09896
Adora3	0.799017	2.36941	2.20724	1.02649	0	1.00148	-1.50374	0.448311	NA	1.79189	0.675989
Adpgk	314.813	294.992	269.283	295.628	369.785	350.518	0.210345	0.278249	NA	293.029	338.644
Adprh	230.916	235.756	194.237	177.582	178.21	182.27	-0.292172	0.156249	NA	220.303	179.354
Adprhl1	0.799017	0	0	1.02649	6.68287	0	1.76056	0.497697	NA	0.266339	2.56978
Adprhl2	213.337	209.693	126.916	167.317	171.527	199.295	-0.00116227	0.99557	NA	183.315	179.38
Adprm	147.818	152.827	146.781	182.715	161.503	152.225	0.149817	0.521169	NA	149.142	165.481
Adra1a	2199.69	2186.97	2458.86	1854.86	1837.79	2183.23	-0.224692	0.104633	0.576032	2281.84	1958.63
Adra1b	3.19607	4.73882	0	5.13243	2.22762	0	0.47076	0.799461	NA	2.64496	2.45335
Adra1d	3.99508	4.73882	3.31085	5.13243	3.34143	6.00889	0.228278	0.84755	NA	4.01492	4.82758
Adra2a	0.799017	1.18471	3.31085	7.18541	2.22762	1.00148	1.1464	0.467178	NA	1.76486	3.4715
Adra2b	0.799017	2.36941	0	1.02649	1.11381	0	-0.474812	0.84835	NA	1.05614	0.713433
Adra2c	3.19607	5.92353	3.31085	2.05297	3.34143	5.0074	-0.254245	0.845332	NA	4.14348	3.46727
Adrb1	355.562	349.488	334.396	406.489	268.428	333.493	-0.053409	0.778594	NA	346.482	336.137
Adrb2	250.891	251.158	221.827	177.582	209.397	163.241	-0.401169	0.0408282	NA	241.292	183.407
Adrb3	4.7941	59.2353	4.41447	7.18541	33.4143	14.0207	-0.507427	0.778174	NA	22.8146	18.2068
Adrbk1	876.521	714.377	562.845	817.084	788.578	689.019	0.106816	0.464088	NA	717.915	764.894
Adrbk2	1127.41	1043.73	1366.28	1291.32	873.228	1356.01	-0.0265365	0.835318	0.960096	1179.14	1173.52
Adrm1	216.534	235.756	157.817	175.529	181.551	208.308	-0.0930374	0.709833	NA	203.369	188.463
Adsl	493.792	496.392	449.173	493.74	486.735	494.732	0.0368641	0.81807	NA	479.786	491.736
Adss	970.805	767.689	1239.36	1217.41	1069.26	945.398	0.139908	0.322077	0.774659	992.619	1077.36
Adssl1	67.9164	66.3435	36.4194	66.7217	72.3977	54.08	0.217819	0.554219	NA	56.8931	64.3998
Adtrp	286.847	371.998	300.184	333.608	257.29	283.419	-0.137026	0.525623	NA	319.676	291.439
Aebp1	285.249	316.316	222.931	257.648	189.348	282.418	-0.184529	0.321259	NA	274.832	243.138
Aebp2	618.439	608.939	669.896	708.276	708.384	637.943	0.116103	0.416049	NA	632.425	684.868
Aen	135.833	168.228	77.2533	119.072	103.584	163.241	0.04249	0.883961	NA	127.105	128.633
Aes	2869.27	3024.55	1956.72	2161.78	1905.73	2384.53	-0.267391	0.00971465	0.203419	2616.85	2150.68
AF251705	39.9508	54.4965	32.0049	48.2449	80.1944	38.0563	0.361196	0.354292	NA	42.1507	55.4985
AF357359	3.99508	2.36941	12.1398	4.10595	5.56906	9.01333	0.279546	0.808244	NA	6.1681	6.22944
AF357399	8.78918	5.92353	3.31085	12.3178	7.79668	9.01333	0.749168	0.410509	NA	6.00786	9.70928
AF529169	3.19607	2.36941	4.41447	2.05297	3.34143	4.00592	-0.0832364	0.954684	NA	3.32665	3.13344
Afap1	356.361	335.272	347.64	335.661	268.428	350.518	-0.136365	0.422853	NA	346.424	318.203
Afap1l1	29.5636	54.4965	25.3832	40.033	40.0972	37.0548	0.12808	0.785481	NA	36.4811	39.0617
Afap1l2	75.1076	73.4517	108.155	43.1125	49.0077	67.0992	-0.68055	0.0431781	NA	85.5713	53.0731
Aff1	1752.24	1708.35	1856.29	1861.02	1554.88	1826.7	-0.0248317	0.836062	0.960096	1772.29	1747.53
Aff2	7.19115	14.2165	11.0362	5.13243	3.34143	7.01037	-1.11498	0.216183	NA	10.8146	5.16141
Aff3	121.451	40.28	36.4194	130.364	132.544	37.0548	0.596389	0.199901	NA	66.05	99.9874
Aff4	4545.61	4593.1	5919.81	4892.24	4847.31	5104.55	-0.00912587	0.927685	0.977438	5019.51	4948.03
Afg3l1	570.498	600.646	490.006	492.714	417.679	569.843	-0.175926	0.240853	NA	553.717	493.412
Afg3l2	1023.54	1086.37	973.391	971.057	794.147	1064.57	-0.135694	0.312574	0.770279	1027.77	943.259
Afmid	21.5734	14.2165	19.8651	22.5827	38.9834	37.0548	0.817344	0.123651	NA	18.5517	32.8736
Afp	3.99508	1.18471	0	7.18541	5.56906	0	1.64998	0.469659	NA	1.7266	4.25149
Aftph	3132.15	3173.83	3547.03	3161.58	3068.55	3244.8	-0.0542706	0.609616	0.909071	3284.33	3158.31
Aga	445.851	523.64	488.903	442.416	485.622	465.689	-0.0638516	0.680062	NA	486.131	464.575
Agap1	1431.84	1358.86	1250.4	1283.11	798.603	1464.17	-0.237462	0.0616325	0.493884	1347.03	1181.96
Agap2	67.1174	42.6494	16.5543	81.0925	55.6906	49.0726	0.723125	0.0887679	NA	42.107	61.9519
Agap3	405.101	411.093	243.9	318.211	300.729	380.563	-0.0584944	0.726091	NA	353.365	333.168
Agbl1	0	2.36941	0	4.10595	5.56906	1.00148	2.22824	0.25382	NA	0.789804	3.55883
Agbl2	2.39705	5.92353	3.31085	3.07946	5.56906	2.00296	-0.230763	0.851769	NA	3.87714	3.55049
Agbl3	57.5292	68.7129	66.2171	73.9071	89.1049	60.0889	0.200756	0.538264	NA	64.1531	74.3669
Agbl5	186.171	169.413	221.827	226.854	179.324	200.296	0.0737323	0.725874	NA	192.47	202.158
Ager	9.5882	4.73882	8.82895	17.4503	14.4795	6.00889	0.651591	0.432684	NA	7.71866	12.6462
Agfg1	507.376	494.022	525.322	621.025	632.645	525.778	0.219583	0.126212	NA	508.907	593.149
Agfg2	500.184	544.965	497.732	443.442	402.086	600.889	-0.112474	0.524736	NA	514.294	482.139
Aggf1	551.321	476.252	571.674	486.555	404.313	552.817	-0.160959	0.298229	NA	533.082	481.229
Agk	169.392	189.553	199.755	166.291	160.389	205.304	-0.0747256	0.72381	NA	186.233	177.328
Agl	1185.74	1172.86	1418.15	1099.37	1079.28	1322.96	-0.107956	0.381531	0.812832	1258.92	1167.2
Agmat	21.5734	26.0635	18.7615	19.5033	16.7072	25.037	-0.131727	0.81533	NA	22.1328	20.4158
Agmo	132.637	145.719	112.569	198.112	212.738	142.21	0.490216	0.115136	NA	130.308	184.353
Ago1	726.306	644.48	732.802	682.614	697.246	715.057	-0.00696286	0.959935	NA	701.196	698.306
Ago2	882.114	888.529	1020.85	960.792	755.164	943.395	-0.0747774	0.560554	0.891327	930.497	886.45
Ago3	302.028	354.227	388.474	379.8	424.362	398.589	0.209671	0.247292	NA	348.243	400.917
Ago4	285.249	255.896	357.572	278.178	242.811	272.403	-0.171797	0.379529	NA	299.573	264.464
Agpat1	521.758	604.2	329.982	385.959	282.908	453.671	-0.364175	0.020078	NA	485.313	374.179
Agpat2	185.372	633.817	169.957	206.324	980.154	351.52	0.499393	0.557825	NA	329.716	512.666
Agpat3	592.87	842.326	566.156	507.085	552.45	618.915	-0.245727	0.139282	NA	667.117	559.483
Agpat4	30.3626	28.4329	13.2434	33.8741	30.0729	27.04	0.417272	0.425474	NA	24.013	30.329
Agpat5	366.749	451.373	413.857	350.032	372.013	324.48	-0.236063	0.235086	NA	410.659	348.842
Agpat6	1558.88	1813.78	1345.31	1329.3	1374.44	1613.39	-0.125836	0.361977	0.801611	1572.66	1439.04
Agpat9	99.0781	106.623	133.538	90.3309	141.454	128.19	0.101158	0.731117	NA	113.08	119.991
Agps	1295.21	1326.87	1493.2	1427.84	1635.07	1348.99	0.101305	0.457992	0.853778	1371.76	1470.64
Agr2	385.925	438.341	302.391	346.953	462.232	407.603	0.121214	0.601551	NA	375.552	405.596
Agrn	574.493	536.672	473.452	579.965	455.549	749.108	0.138491	0.341097	NA	528.206	594.874
Agrp	2.39705	5.92353	0	3.07946	4.45524	0	0.0126431	0.994417	NA	2.77353	2.51157
Agt	1029.13	1267.63	769.222	749.336	383.151	701.037	-0.75883	0.00120992	0.0882062	1022	611.174
Agtpbp1	459.435	486.914	482.281	460.893	426.59	462.684	-0.0817299	0.58975	NA	476.21	450.056
Agtr1a	9.5882	13.0318	7.72533	5.13243	8.91049	11.0163	-0.269703	0.756164	NA	10.1151	8.35307
Agtrap	640.811	657.512	635.684	564.568	553.564	668.989	-0.119872	0.395932	NA	644.669	595.707
Ahctf1	1637.19	1663.33	1539.55	1994.46	1640.64	1919.84	0.193366	0.163073	0.645972	1613.35	1851.65
Ahcy	135.034	159.935	108.155	131.39	92.4463	131.194	-0.185096	0.455787	NA	134.375	118.344
Ahcyl1	2573.63	2734.3	3073.58	2732.51	2682.06	2681.97	-0.0454601	0.694696	0.931032	2793.84	2698.84
Ahcyl2	1070.68	1088.74	1357.45	881.752	867.659	1017.5	-0.339883	0.00517989	0.148844	1172.29	922.305
Ahdc1	220.529	217.986	162.232	176.556	154.82	218.323	-0.13571	0.526378	NA	200.249	183.233
Ahi1	80.7007	55.6812	77.2533	52.3508	57.9182	60.0889	-0.32541	0.348117	NA	71.2117	56.786
Ahnak	9291.76	11105.4	10389.5	9547.36	10086.7	11286.7	0.00512	0.964281	0.99135	10262.2	10306.9
Ahr	365.151	342.38	430.411	332.582	426.59	348.515	-0.0377515	0.823407	NA	379.314	369.229
Ahrr	3.99508	3.55412	2.20724	5.13243	5.56906	3.00444	0.510655	0.699706	NA	3.25215	4.56864
Ahsa1	1304	1633.71	1157.7	1194.83	1208.49	1272.88	-0.148029	0.259225	0.744583	1365.13	1225.4
Ahsa2	230.916	232.202	304.599	245.33	192.689	258.382	-0.138203	0.481029	NA	255.906	232.134
AI118078	23.1715	11.8471	17.6579	21.5562	15.5934	15.0222	-0.0150457	0.981591	NA	17.5588	17.3906
AI182371	5.59312	1.18471	2.20724	3.07946	4.45524	3.00444	0.229036	0.866078	NA	2.99502	3.51305
AI197445	9.5882	7.10823	16.5543	12.3178	11.1381	11.0163	0.140153	0.854421	NA	11.0836	11.4907
AI314180	3426.98	3427.35	4449.79	3753.86	3312.47	3871.73	-0.0395164	0.707328	0.93497	3768.04	3646.02
AI317395	3.19607	1.18471	2.20724	3.07946	13.3657	6.00889	1.50942	0.324112	NA	2.196	7.48469
AI413582	96.681	87.6682	77.2533	93.4103	155.934	73.1081	0.239547	0.409468	NA	87.2008	107.484
AI414108	13.5833	9.47764	13.2434	12.3178	8.91049	14.0207	-0.0860751	0.90598	NA	12.1014	11.7497
AI427809	26.3675	13.0318	22.0724	18.4768	11.1381	13.0193	-0.521467	0.438218	NA	20.4906	14.2114
AI429214	11.9852	17.7706	18.7615	11.2914	14.4795	16.0237	-0.197367	0.760324	NA	16.1724	13.9315
AI450353	8.78918	4.73882	8.82895	14.3708	14.4795	4.00592	0.458103	0.584557	NA	7.45232	10.9521
AI463170	138.23	135.056	119.191	143.708	108.04	135.2	-0.0280982	0.909001	NA	130.826	128.983
AI464131	194.96	235.756	188.719	159.105	139.226	199.295	-0.328078	0.119762	NA	206.478	165.876
AI467606	66.3184	43.8341	15.4507	68.7746	164.844	10.0148	0.583592	0.206041	NA	41.8677	81.2112
AI504432	65.5194	27.2482	26.4868	93.4103	178.21	29.0429	1.09919	0.00613067	NA	39.7515	100.221
AI506816	67.1174	52.127	33.1085	62.6157	50.1215	52.077	0.150919	0.688505	NA	50.7843	54.9381
AI507597	5.59312	8.29294	19.8651	10.2649	12.2519	10.0148	0.134334	0.859628	NA	11.2504	10.8439
AI597479	403.503	409.908	470.141	386.986	482.28	422.625	0.0125679	0.937611	NA	427.851	430.63
AI606473	0.799017	2.36941	0	2.05297	4.45524	1.00148	1.24823	0.590381	NA	1.05614	2.50323
AI607873	139.029	106.623	115.88	123.178	100.243	108.16	-0.129456	0.625627	NA	120.511	110.527
AI661453	356.361	330.533	364.194	255.595	272.884	334.495	-0.293486	0.104268	NA	350.363	287.658
AI662270	87.0928	41.4647	45.2483	69.8011	204.941	30.0444	0.438524	0.201989	NA	57.9353	101.596
AI837181	205.347	193.107	135.745	183.741	160.389	160.237	-0.0629588	0.774469	NA	178.066	168.122
AI839979	1.59803	1.18471	2.20724	10.2649	4.45524	4.00592	1.92321	0.141281	NA	1.66333	6.24201
AI846148	135.034	174.152	142.367	137.549	147.023	169.25	0.00861816	0.972824	NA	150.517	151.274
AI847159	0.799017	0	1.10362	2.05297	1.11381	0	0.630261	0.800427	NA	0.634212	1.0556
AI854703	4.7941	1.18471	1.10362	3.07946	6.68287	2.00296	0.655066	0.61965	NA	2.36081	3.92176
AI987944	226.921	206.139	247.21	238.145	350.851	195.289	0.170002	0.369136	NA	226.757	261.428
Aicda	13.5833	0	2.20724	2.05297	11.1381	0	-1.21272	0.497981	NA	5.26351	4.39703
Aida	303.626	289.068	339.914	338.741	442.183	302.447	0.204539	0.219654	NA	310.87	361.124
Aif1	90.2889	84.1141	62.9062	69.8011	120.292	44.0652	-0.110688	0.722996	NA	79.1031	78.0526
Aif1l	31.9607	46.2035	20.9687	26.6887	30.0729	40.0592	-0.00448751	0.992682	NA	33.0443	32.2736
Aifm1	579.287	656.327	642.306	610.76	435.5	638.945	-0.174528	0.230587	NA	625.973	561.735
Aifm2	186.97	334.087	171.061	173.476	260.632	230.341	-0.0427034	0.878931	NA	230.706	221.483
Aifm3	63.1223	69.8976	41.9375	63.6422	56.8044	67.0992	0.12194	0.72535	NA	58.3191	62.5153
Aig1	230.117	259.451	261.558	236.092	197.145	226.335	-0.187734	0.345276	NA	250.375	219.857
Aim1	696.743	725.04	767.015	747.283	578.068	710.05	-0.109674	0.488731	NA	729.599	678.467
Aim1l	9.5882	15.4012	8.82895	18.4768	22.2762	16.0237	0.766017	0.273635	NA	11.2728	18.9256
Aim2	51.1371	24.8788	26.4868	69.8011	130.316	25.037	0.913907	0.035429	NA	34.1676	75.0513
Aimp1	593.669	550.888	661.067	592.283	723.977	608.9	0.0938869	0.515754	NA	601.875	641.72
Aimp2	162.999	195.476	125.812	145.761	152.592	170.252	-0.0301493	0.89759	NA	161.429	156.202
Aip	230.916	229.833	125.812	158.079	201.6	184.272	-0.0607135	0.780874	NA	195.52	181.317
Aire	2.39705	0	0	2.05297	7.79668	0	1.292	0.557993	NA	0.799017	3.28322
Airn	97.48	74.6364	144.574	126.258	129.202	109.161	0.243947	0.339462	NA	105.563	121.54
Ajap1	8.78918	1.18471	3.31085	2.05297	2.22762	6.00889	-0.541965	0.673214	NA	4.42825	3.42983
Ajuba	133.436	131.502	134.641	134.47	90.2187	153.227	-0.121421	0.645981	NA	133.193	125.972
AK010878	77.5046	65.1588	56.2845	65.6952	71.2839	59.0874	-0.0209121	0.949156	NA	66.316	65.3555
Ak1	113.46	151.642	123.605	113.94	116.95	140.207	-0.072135	0.788685	NA	129.569	123.699
Ak2	613.645	643.295	438.136	549.171	571.385	611.905	0.0447527	0.782594	NA	565.025	577.487
Ak3	3449.35	3762.62	3659.6	3666.61	3318.04	3665.42	-0.0318139	0.784304	0.95087	3623.86	3550.03
Ak4	290.043	337.641	201.962	311.026	231.673	344.509	0.098915	0.626908	NA	276.549	295.736
Ak5	23.9705	13.0318	16.5543	33.8741	21.1624	30.0444	0.632479	0.314052	NA	17.8522	28.3603
Ak6	127.044	170.598	153.403	118.046	167.072	121.179	-0.161406	0.522793	NA	150.348	135.432
Ak7	1.59803	1.18471	2.20724	1.02649	3.34143	1.00148	-0.0610306	0.972714	NA	1.66333	1.7898
Ak8	3.19607	0	2.20724	1.02649	5.56906	1.00148	-0.0356822	0.986723	NA	1.8011	2.53234
Akap1	721.512	1004.63	625.752	705.197	702.815	871.288	-0.0359839	0.820229	0.95734	783.965	759.767
Akap10	572.096	544.965	646.72	651.819	673.856	567.84	0.104254	0.45431	NA	587.927	631.172
Akap11	1361.52	1312.65	1703.99	1399.1	1412.31	1367.02	-0.0562023	0.624266	0.915542	1459.39	1392.81
Akap12	279.656	286.699	216.309	217.615	222.762	235.348	-0.203786	0.301759	NA	260.888	225.242
Akap13	7183.96	7152.07	8067.45	7628.85	5896.52	8277.24	-0.0540014	0.640875	0.918421	7467.83	7267.54
Akap14	2.39705	0	3.31085	3.07946	2.22762	0	-0.194735	0.922342	NA	1.90263	1.76903
Akap17b	544.929	425.309	669.896	499.899	393.175	574.85	-0.159353	0.415243	NA	546.712	489.308
Akap2	0.799017	1.18471	2.20724	1.02649	0	1.00148	-1.06528	0.665874	NA	1.39699	0.675989
Akap5	21.5734	21.3247	25.3832	37.98	37.8696	40.0592	0.772539	0.13141	NA	22.7605	38.6363
Akap6	27.1666	43.8341	30.9013	22.5827	22.2762	32.0474	-0.412372	0.430208	NA	33.9673	25.6354
Akap7	582.483	671.728	898.345	822.216	690.563	668.989	0.0422291	0.803997	NA	717.519	727.256
Akap8	1233.68	1185.89	1382.83	1610.56	1462.43	1736.57	0.337598	0.00275417	0.112392	1267.47	1603.19
Akap8l	300.43	228.648	339.914	390.065	325.233	395.585	0.354436	0.0488837	NA	289.664	370.294
Akap9	4114.94	3780.4	5212.39	4135.72	3083.03	5014.42	-0.118499	0.260649	0.745865	4369.24	4077.72
Akip1	174.186	170.598	180.993	162.185	157.047	171.253	-0.101959	0.636362	NA	175.259	163.495
Akirin1	423.479	463.22	387.37	424.966	591.434	447.662	0.1915	0.265051	NA	424.69	488.02
Akirin2	457.837	443.08	520.908	448.575	397.631	431.638	-0.151964	0.323026	NA	473.941	425.948
Akna	234.112	90.0376	92.7039	286.39	327.46	88.1303	0.68567	0.0563316	NA	138.951	233.994
Akr1a1	3366.26	3481.85	3180.63	2980.92	3178.82	3185.71	-0.101577	0.320948	0.774659	3342.91	3115.15
Akr1b10	510.572	536.672	574.985	492.714	504.556	487.721	-0.124543	0.389521	NA	540.743	494.997
Akr1b7	1.59803	3.55412	2.20724	5.13243	4.45524	1.00148	0.405666	0.796691	NA	2.45313	3.52972
Akr1b8	59.9262	47.3882	57.3881	69.8011	46.7801	57.0844	0.076106	0.862412	NA	54.9009	57.8885
Akr1c12	92.6859	110.178	108.155	111.887	96.9016	87.1288	-0.0686298	0.807472	NA	103.673	98.6392
Akr1c13	189.367	217.986	236.174	188.874	271.77	185.274	-0.00604831	0.977948	NA	214.509	215.306
Akr1c14	53.5341	56.8659	33.1085	30.7946	36.7558	43.0637	-0.358752	0.407424	NA	47.8362	36.8714
Akr1c18	0.799017	0	2.20724	2.05297	1.11381	0	0.273744	0.910899	NA	1.00208	1.0556
Akr1c19	3.99508	2.36941	2.20724	4.10595	2.22762	1.00148	-0.229547	0.884046	NA	2.85724	2.44502
Akr1c21	2.39705	3.55412	8.82895	7.18541	4.45524	3.00444	0.144092	0.907437	NA	4.9267	4.8817
Akr1cl	11.1862	2.36941	6.62171	22.5827	22.2762	12.0178	1.45033	0.0662421	NA	6.72578	18.9589
Akr1e1	193.362	214.432	249.418	200.165	237.242	221.327	0.0128783	0.948256	NA	219.07	219.578
Akr7a5	180.578	251.158	141.263	134.47	136.999	197.292	-0.278119	0.243708	NA	190.999	156.253
Akt1	2139.77	2133.65	1403.8	1644.43	1562.68	1921.84	-0.128642	0.328312	0.777643	1892.41	1709.65
Akt1s1	222.926	248.788	173.268	210.43	178.21	213.315	-0.0900485	0.653688	NA	214.994	200.652
Akt2	704.733	831.663	644.513	632.316	687.221	693.025	-0.110987	0.42679	NA	726.97	670.854
Akt3	424.278	402.8	406.131	435.23	494.532	309.458	-0.0135478	0.938802	NA	411.07	413.073
Aktip	728.703	778.352	740.528	694.932	902.187	706.044	0.0288975	0.842448	0.962185	749.194	767.721
Alad	252.489	298.546	167.75	177.582	226.104	223.33	-0.165989	0.428664	NA	239.595	209.005
Alas1	1851.32	2166.83	1137.83	2005.76	1632.85	2253.33	0.222818	0.156349	0.640203	1718.66	1963.98
Alas2	155.808	126.763	144.574	123.178	171.527	175.259	0.134179	0.602824	NA	142.382	156.655
Alb	0.799017	4.73882	2.20724	0	1.11381	2.00296	-1.3369	0.501537	NA	2.58169	1.03892
Alcam	1551.69	1460.74	1857.39	1485.33	1508.1	1609.38	-0.0710713	0.678657	0.928139	1623.27	1534.27
Aldh16a1	169.392	199.031	96.0148	145.761	125.861	155.23	-0.065422	0.778288	NA	154.812	142.284
Aldh18a1	2032.7	1703.61	1549.48	2102.25	1486.94	2334.45	0.143664	0.706118	0.93497	1761.93	1974.55
Aldh1a1	1252.86	1519.98	883.998	1120.92	1130.52	1424.11	0.0231266	0.888666	0.965313	1218.94	1225.18
Aldh1a2	16.7793	26.0635	7.72533	19.5033	15.5934	17.0252	0.174371	0.789644	NA	16.8561	17.3739
Aldh1a3	523.356	428.863	694.176	410.595	468.915	610.903	-0.130123	0.496868	NA	548.798	496.804
Aldh1a7	1093.85	1203.66	871.858	923.838	835.358	1125.66	-0.13968	0.334719	0.782512	1056.46	961.62
Aldh1b1	77.5046	63.9741	75.046	67.7481	53.4629	71.1051	-0.185023	0.611557	NA	72.1749	64.1054
Aldh1l1	731.899	695.422	669.896	677.481	481.166	728.077	-0.183643	0.38619	NA	699.073	628.908
Aldh1l2	1711.49	1067.42	1079.34	1555.13	1228.53	1622.4	0.188176	0.6914	0.931032	1286.08	1468.69
Aldh2	1826.55	2156.16	1250.4	1412.45	1275.31	1808.67	-0.204695	0.112047	0.590579	1744.37	1498.81
Aldh3a1	98.279	61.6047	43.0411	68.7746	47.8939	91.1348	0.0244398	0.951912	NA	67.6416	69.2678
Aldh3a2	2004.73	1929.89	2135.5	1984.2	1612.8	2243.32	-0.0701667	0.524393	0.876399	2023.37	1946.77
Aldh3b1	51.9361	26.0635	14.347	36.9535	50.1215	33.0489	0.483877	0.305049	NA	30.7822	40.0413
Aldh3b2	528.949	547.334	503.25	480.396	321.891	538.797	-0.272992	0.0732566	NA	526.511	447.028
Aldh4a1	616.042	646.849	392.888	467.052	445.524	572.847	-0.135993	0.412729	NA	551.926	495.141
Aldh5a1	284.45	245.234	337.707	281.257	210.51	283.419	-0.166197	0.378027	NA	289.13	258.396
Aldh6a1	2740.63	3315.99	3267.81	3038.4	2987.24	3060.53	-0.0349594	0.846828	0.963004	3108.14	3028.72
Aldh7a1	1635.59	1662.14	1580.38	1390.89	1169.5	1562.31	-0.254737	0.0786474	0.544195	1626.04	1374.23
Aldh8a1	20.7744	29.6176	2.20724	21.5562	23.39	30.0444	0.925941	0.217037	NA	17.5331	24.9969
Aldh9a1	960.418	877.867	918.21	936.156	954.536	965.428	0.0500467	0.697453	0.931717	918.832	952.04
Aldoa	8010.14	9780.93	6546.66	6735.81	6950.18	7981.8	-0.157057	0.156629	0.640203	8112.58	7222.6
Aldob	0.799017	0	2.20724	2.05297	0	4.00592	0.608744	0.836811	NA	1.00208	2.01963
Aldoc	183.774	143.349	171.061	128.311	172.641	165.244	-0.101413	0.683008	NA	166.061	155.399
Alg1	266.872	276.036	219.62	237.118	243.925	256.379	-0.0425138	0.823853	NA	254.176	245.807
Alg10b	562.508	526.009	682.036	533.773	525.719	565.837	-0.114505	0.434071	NA	590.184	541.776
Alg11	739.09	807.969	850.89	769.865	828.676	745.102	-0.0310897	0.817159	0.956911	799.316	781.214
Alg12	139.029	159.935	111.465	128.311	157.047	144.213	0.0759575	0.76657	NA	136.81	143.191
Alg13	107.867	100.7	118.087	147.814	167.072	109.161	0.363504	0.150283	NA	108.885	141.349
Alg14	269.269	279.591	283.63	226.854	270.656	214.317	-0.230111	0.225395	NA	277.496	237.276
Alg2	368.347	335.272	382.956	442.416	451.094	396.586	0.246835	0.125344	NA	362.191	430.032
Alg3	117.455	143.349	79.4605	127.284	65.7149	104.154	-0.189859	0.541061	NA	113.422	99.0511
Alg5	987.585	1132.58	1079.34	964.898	1157.25	926.37	-0.0748315	0.63757	0.918421	1066.5	1016.17
Alg6	302.028	328.163	388.474	360.297	367.558	342.506	0.0802549	0.631948	NA	339.555	356.787
Alg8	94.284	108.993	115.88	98.5428	96.9016	120.178	-0.0146842	0.957515	NA	106.386	105.207
Alg9	600.062	582.875	535.255	478.343	475.597	557.825	-0.187112	0.251349	NA	572.73	503.922
Alk	4.7941	2.36941	3.31085	3.07946	3.34143	4.00592	-0.00130857	0.99924	NA	3.49146	3.47561
Alkbh1	148.617	149.273	186.511	196.059	219.421	191.283	0.334948	0.118343	NA	161.467	202.254
Alkbh2	42.3479	58.0506	36.4194	41.0595	43.4386	49.0726	-0.0162349	0.966685	NA	45.606	44.5236
Alkbh3	159.004	185.999	200.859	237.118	236.128	200.296	0.307984	0.139586	NA	181.954	224.514
Alkbh4	56.7302	67.5282	43.0411	56.4568	67.9425	58.0859	0.138446	0.687625	NA	55.7665	60.8284
Alkbh5	3963.12	4231.77	4727.9	3860.62	3069.66	4381.48	-0.205617	0.0873091	0.556441	4307.6	3770.59
Alkbh6	150.215	154.012	110.362	138.576	145.909	138.204	0.0421669	0.857189	NA	138.196	140.896
Alkbh7	69.5144	72.267	51.8701	58.5098	69.0563	49.0726	-0.128771	0.713791	NA	64.5505	58.8795
Alkbh8	154.21	162.305	186.511	146.788	211.624	156.231	0.0290517	0.896453	NA	167.675	171.548
Alms1	162.2	135.056	204.169	187.847	196.031	149.221	0.0994765	0.651968	NA	167.142	177.7
Alox12	496.988	508.239	475.659	408.542	388.72	509.754	-0.191441	0.25444	NA	493.629	435.672
Alox12e	2.39705	3.55412	0	3.07946	3.34143	1.00148	0.84085	0.619783	NA	1.98372	2.47413
Alox5	18.3774	29.6176	25.3832	14.3708	23.39	22.0326	-0.294297	0.609308	NA	24.4594	19.9311
Alox5ap	87.0928	73.4517	46.352	48.2449	74.6253	41.0607	-0.335412	0.348484	NA	68.9655	54.6437
Alox8	1.59803	1.18471	0	2.05297	4.45524	0	0.78239	0.740769	NA	0.92758	2.16941
Aloxe3	1.59803	1.18471	1.10362	3.07946	1.11381	2.00296	0.598253	0.760424	NA	1.29545	2.06541
Alpk1	200.553	178.891	230.656	283.31	230.559	219.324	0.271095	0.18599	NA	203.367	244.398
Alpk2	4.7941	0	1.10362	5.13243	5.56906	0	0.637214	0.770128	NA	1.96591	3.56716
Alpk3	8.78918	16.5859	5.51809	10.2649	14.4795	12.0178	0.314909	0.700154	NA	10.2977	12.2541
Alpl	72.7105	98.3306	55.1809	56.4568	43.4386	74.1096	-0.383238	0.229324	NA	75.4073	58.0017
Als2	285.249	355.412	333.293	323.343	245.038	333.493	-0.1209	0.492825	NA	324.651	300.625
Als2cl	253.288	216.801	228.449	333.608	306.298	281.416	0.39764	0.0307607	NA	232.846	307.107
Als2cr12	11.9852	7.10823	13.2434	13.3443	20.0486	8.01185	0.281488	0.71934	NA	10.779	13.8016
Alx4	24.7695	42.6494	43.0411	26.6887	33.4143	31.0459	-0.261088	0.589873	NA	36.82	30.383
Alyref	446.65	485.729	350.951	318.211	385.379	405.6	-0.201239	0.277999	NA	427.777	369.73
Alyref2	47.941	56.8659	28.6941	35.927	42.3248	48.0711	-0.0416328	0.920867	NA	44.5003	42.1077
Amacr	124.647	127.948	108.155	93.4103	125.861	116.172	-0.103765	0.693729	NA	120.25	111.814
Ambra1	614.444	576.952	606.99	660.031	534.629	665.985	0.0397387	0.776481	NA	599.462	620.215
Amdhd2	115.058	92.407	50.7664	101.622	84.6496	97.1437	0.196333	0.513524	NA	86.0773	94.4718
Amelx	0	1.18471	5.51809	3.07946	2.22762	2.00296	1.1598	0.546828	NA	2.23427	2.43668
Amer1	353.964	311.578	456.898	364.403	354.192	392.581	0.00123871	0.993946	NA	374.147	370.392
Amer2	12.7843	7.10823	17.6579	14.3708	17.821	19.0281	0.459934	0.528767	NA	12.5168	17.0733
Amer3	2.39705	0	0	0	1.11381	2.00296	0.550852	0.851655	NA	0.799017	1.03892
Amfr	3346.28	3962.84	3443.29	3152.34	2983.9	3488.16	-0.162457	0.174589	0.662329	3584.14	3208.13
Amh	4.7941	2.36941	0	1.02649	0	4.00592	-0.764134	0.716443	NA	2.38784	1.67747
Amhr2	98.279	88.8529	52.9737	56.4568	81.3082	87.1288	-0.0609765	0.856752	NA	80.0352	74.9646
Amica1	28.7646	17.7706	16.5543	45.1654	45.6663	10.0148	0.564532	0.347658	NA	21.0298	33.6155
Amigo1	422.68	427.679	420.479	336.688	292.932	395.585	-0.323205	0.0384246	NA	423.612	341.735
Amigo2	83.0977	75.8212	90.4967	75.96	70.1701	79.117	-0.14786	0.627979	NA	83.1385	75.0824
Amigo3	157.406	183.629	147.885	178.609	109.153	207.307	-0.0287398	0.904672	NA	162.973	165.023
Ammecr1	84.6958	84.1141	98.222	69.8011	91.3325	77.114	-0.164084	0.580764	NA	89.0106	79.4159
Ammecr1l	516.165	612.493	653.342	700.064	614.824	649.961	0.145812	0.338035	NA	594	654.95
Amn	8.78918	7.10823	5.51809	11.2914	13.3657	7.01037	0.543514	0.531396	NA	7.1385	10.5558
Amn1	109.465	164.674	165.543	136.523	181.551	119.176	-0.0178438	0.94425	NA	146.561	145.75
Amot	1061.89	1049.65	1438.01	899.203	826.448	1009.49	-0.365217	0.00352748	0.128025	1183.19	911.714
Amotl1	1347.14	1416.91	1453.47	1402.18	987.951	1598.36	-0.111816	0.372146	0.804544	1405.84	1329.5
Amotl2	285.249	312.762	284.733	259.701	219.421	305.452	-0.185552	0.307634	NA	294.248	261.525
Ampd1	0	11.8471	0	4.10595	10.0243	0	0.0438583	0.983523	NA	3.94902	4.71008
Ampd2	155.009	170.598	115.88	144.735	136.999	196.29	0.11323	0.66804	NA	147.162	159.341
Ampd3	153.411	144.534	173.268	181.688	140.34	183.271	0.0916619	0.680481	NA	157.071	168.433
Amph	7.99017	4.73882	8.82895	8.2119	6.68287	1.00148	-0.56277	0.600811	NA	7.18598	5.29875
Amt	524.954	595.907	574.985	423.939	442.183	485.718	-0.326996	0.0389766	NA	565.282	450.613
Amtn	56.7302	67.5282	24.2796	1.02649	8.91049	7.01037	-3.08284	1.49664e-06	NA	49.5127	5.64911
Amy1	78199.8	59407.1	113501	247059	158582	110919	1.00408	0.218575	0.710773	83702.4	172187
Amz1	23.9705	20.14	22.0724	22.5827	26.7315	16.0237	-0.0433649	0.937816	NA	22.061	21.7793
Amz2	428.273	452.558	558.431	491.687	425.476	447.662	-0.0690512	0.67249	NA	479.754	454.942
Anapc1	1711.49	1705.98	1823.18	1756.32	1665.15	1786.64	-0.00893263	0.935262	0.981494	1746.88	1736.04
Anapc10	86.2938	93.5917	120.294	107.781	150.365	99.1466	0.248658	0.353866	NA	100.06	119.097
Anapc11	128.642	142.165	80.5641	112.914	135.885	97.1437	0.00765344	0.97659	NA	117.123	115.314
Anapc13	385.126	458.481	356.469	359.27	406.541	334.495	-0.123593	0.45567	NA	400.025	366.769
Anapc15	98.279	117.286	84.9786	91.3573	111.381	91.1348	-0.031101	0.912316	NA	100.181	97.9577
Anapc16	266.073	234.572	218.516	243.277	357.533	225.333	0.177505	0.333616	NA	239.72	275.381
Anapc2	475.415	411.093	418.271	467.052	444.411	462.684	0.072713	0.63599	NA	434.926	458.049
Anapc4	648.802	598.276	721.766	629.237	744.026	593.878	-0.00151731	0.991126	NA	656.281	655.714
Anapc5	2460.17	2564.89	2181.85	2347.58	2120.7	2617.87	-0.0289714	0.79233	0.95087	2402.3	2362.05
Anapc7	418.685	400.43	368.608	398.277	398.744	415.615	0.0289346	0.862329	NA	395.908	404.212
Ang	28.7646	31.987	18.7615	18.4768	27.8453	10.0148	-0.571553	0.290321	NA	26.5044	18.779
Angel1	217.333	184.814	187.615	185.794	130.316	185.274	-0.252717	0.271953	NA	196.587	167.128
Angel2	627.228	681.206	673.207	791.421	650.466	744.1	0.138569	0.334947	NA	660.547	728.663
Angpt1	147.818	206.139	192.03	128.311	144.795	161.238	-0.326315	0.191709	NA	181.995	144.782
Angpt2	23.1715	14.2165	15.4507	24.6357	50.1215	28.0415	0.911603	0.0954663	NA	17.6129	34.2662
Angpt4	3.99508	3.55412	1.10362	0	1.11381	0	-2.9268	0.254826	NA	2.88427	0.37127
Angptl1	19.9754	4.73882	4.41447	29.7681	44.5524	8.01185	1.42641	0.0607968	NA	9.70957	27.4441
Angptl2	345.175	438.341	286.941	329.502	312.981	410.607	-0.0223281	0.910074	NA	356.819	351.03
Angptl3	9.5882	7.10823	18.7615	14.3708	14.4795	11.0163	0.271462	0.708309	NA	11.8193	13.2889
Angptl4	11.1862	112.547	34.2122	35.927	55.6906	13.0193	-0.895658	0.215975	NA	52.6485	34.879
Angptl6	7.19115	9.47764	2.20724	8.2119	3.34143	3.00444	-0.183403	0.866743	NA	6.29201	4.85259
Angptl7	9.5882	8.29294	7.72533	17.4503	18.9348	15.0222	1.00197	0.172431	NA	8.53549	17.1358
Ank	296.435	484.545	283.63	284.337	312.981	287.425	-0.250597	0.273488	NA	354.87	294.914
Ank1	5.59312	10.6623	7.72533	5.13243	7.79668	3.00444	-0.677014	0.520063	NA	7.9936	5.31119
Ank2	520.16	306.839	499.939	423.939	389.834	617.914	0.106961	0.880572	NA	442.313	477.229
Ank3	2429.81	2455.89	2877.13	2476.91	1940.26	3001.44	-0.0874456	0.561479	0.891894	2587.61	2472.87
Ankdd1b	25.5685	34.3565	33.1085	32.8476	17.821	26.0385	-0.294768	0.550874	NA	31.0112	25.569
Ankef1	2.39705	8.29294	1.10362	3.07946	13.3657	3.00444	0.361936	0.784921	NA	3.9312	6.48321
Ankfy1	1221.7	1187.07	1127.9	1119.9	1187.32	1180.75	-0.0196365	0.874417	0.96523	1178.89	1162.66
Ankhd1	1924.83	1724.93	2198.41	2229.53	1899.05	2144.17	0.103757	0.399377	0.828411	1949.39	2090.92
Ankib1	1003.56	1055.57	1095.89	1082.94	1101.56	1058.57	0.0412053	0.728617	0.939785	1051.68	1081.02
Ankle1	3.99508	5.92353	2.20724	15.3973	3.34143	3.00444	0.945619	0.447151	NA	4.04195	7.24773
Ankle2	1480.58	1440.6	1811.04	1487.38	1392.26	1477.18	-0.112053	0.355064	0.795161	1577.41	1452.28
Ankmy1	2.39705	2.36941	3.31085	5.13243	1.11381	2.00296	-0.0244566	0.986583	NA	2.69244	2.74974
Ankmy2	451.444	374.367	443.655	400.33	387.606	436.646	-0.055495	0.740162	NA	423.155	408.194
Ankra2	313.215	290.253	346.536	313.079	355.306	318.471	0.0572428	0.739549	NA	316.668	328.952
Ankrd10	476.214	509.423	557.327	683.64	619.279	581.86	0.292082	0.0580168	NA	514.322	628.26
Ankrd11	1669.94	1531.82	1538.44	1770.69	1147.23	1899.81	-0.0137743	0.914348	0.973858	1580.07	1605.91
Ankrd12	826.982	785.46	932.557	1077.81	1002.43	1014.5	0.285617	0.0430694	0.430968	848.333	1031.58
Ankrd13a	2057.47	2162.09	1818.76	1840.49	1577.16	2098.1	-0.139526	0.194846	0.688058	2012.77	1838.58
Ankrd13b	44.7449	50.9423	28.6941	41.0595	27.8453	55.0815	-0.0259524	0.949241	NA	41.4604	41.3287
Ankrd13c	615.243	732.148	729.492	690.826	713.953	689.019	0.0146404	0.918731	NA	692.294	697.933
Ankrd13d	19.9754	20.14	11.0362	28.7416	17.821	18.0267	0.385086	0.520938	NA	17.0505	21.5298
Ankrd16	127.044	101.885	165.543	169.37	163.73	181.268	0.398369	0.0945233	NA	131.49	171.456
Ankrd17	2325.94	1972.53	2707.18	2350.66	1939.15	2341.46	-0.0776168	0.520005	0.87139	2335.22	2210.42
Ankrd2	1.59803	0	2.20724	3.07946	1.11381	3.00444	0.952755	0.644574	NA	1.26842	2.39924
Ankrd22	78.3036	90.0376	124.709	115.993	136.999	114.169	0.3534	0.179194	NA	97.6834	122.387
Ankrd23	102.274	78.1906	72.8388	92.3838	134.771	129.191	0.491723	0.0950889	NA	84.4345	118.782
Ankrd24	307.621	249.973	332.189	478.343	288.477	492.729	0.461321	0.012166	NA	296.594	419.85
Ankrd26	157.406	138.611	172.164	184.768	155.934	172.255	0.131114	0.552133	NA	156.06	170.985
Ankrd27	659.988	631.448	688.658	738.044	582.523	680.006	0.00979816	0.945383	NA	660.031	666.858
Ankrd28	745.483	751.103	878.48	837.613	898.846	857.268	0.133119	0.30845	0.769211	791.689	864.576
Ankrd29	21.5734	15.4012	23.176	24.6357	17.821	7.01037	-0.323679	0.627924	NA	20.0502	16.489
Ankrd32	186.171	185.999	224.034	218.642	256.177	154.228	0.0604456	0.768283	NA	198.735	209.682
Ankrd33b	191.764	151.642	169.957	212.483	208.283	190.281	0.249273	0.435671	NA	171.121	203.682
Ankrd35	22.3725	13.0318	16.5543	10.2649	12.2519	23.0341	-0.260352	0.705532	NA	17.3195	15.1836
Ankrd37	20.7744	14.2165	16.5543	23.6092	17.821	15.0222	0.122452	0.844601	NA	17.1817	18.8175
Ankrd39	65.5194	61.6047	64.0099	70.8276	69.0563	69.1022	0.127143	0.693469	NA	63.7113	69.662
Ankrd40	902.889	1037.8	957.941	856.09	839.814	928.373	-0.144106	0.258601	0.744583	966.21	874.759
Ankrd42	43.9459	27.2482	51.8701	28.7416	46.7801	46.0681	0.0027323	0.995174	NA	41.0214	40.5299
Ankrd44	340.381	216.801	206.377	404.436	480.053	197.292	0.452492	0.0524494	NA	254.52	360.593
Ankrd46	464.229	428.863	442.551	434.204	405.427	459.68	-0.043876	0.772114	NA	445.214	433.104
Ankrd49	190.965	175.336	192.03	262.781	323.005	211.312	0.496564	0.0114179	NA	186.11	265.699
Ankrd50	197.357	208.508	206.377	181.688	169.299	197.292	-0.162891	0.431511	NA	204.081	182.76
Ankrd52	279.656	283.145	280.319	318.211	237.242	311.461	0.026207	0.888394	NA	281.04	288.971
Ankrd53	8.78918	4.73882	7.72533	1.02649	11.1381	4.00592	-0.633442	0.576893	NA	7.08444	5.39017
Ankrd54	144.622	139.795	72.8388	104.702	102.471	127.188	-0.0464675	0.856771	NA	119.085	111.453
Ankrd55	6.39213	1.18471	3.31085	6.15892	4.45524	0	-0.242751	0.884994	NA	3.62923	3.53806
Ankrd6	108.666	94.7764	119.191	104.702	113.609	110.163	0.0284791	0.914774	NA	107.544	109.491
Ankrd61	7.99017	7.10823	16.5543	15.3973	13.3657	9.01333	0.357006	0.627457	NA	10.5509	12.5921
Ankrd9	95.083	145.719	73.9424	97.5163	90.2187	112.166	-0.0362384	0.902489	NA	104.915	99.9669
Anks1	399.508	370.813	303.495	346.953	285.136	377.558	-0.0945444	0.579757	NA	357.939	336.549
Anks1b	6.39213	3.55412	2.20724	5.13243	6.68287	4.00592	0.460686	0.714542	NA	4.05116	5.27374
Anks3	246.097	226.279	245.003	278.178	284.022	288.427	0.24365	0.182706	NA	239.126	283.542
Anks6	50.338	26.0635	36.4194	40.033	34.5281	47.0696	0.0834802	0.850185	NA	37.607	40.5436
Ankzf1	217.333	199.031	309.013	275.099	251.721	320.474	0.239921	0.190979	NA	241.792	282.431
Anln	47.941	30.8023	60.699	73.9071	75.7392	50.074	0.515273	0.226999	NA	46.4808	66.5734
Ano1	3828.89	3878.73	4567.88	4187.04	2278.86	4087.04	-0.258429	0.0555579	0.478255	4091.83	3517.65
Ano10	319.607	297.361	329.982	281.257	265.087	315.467	-0.140545	0.418368	NA	315.65	287.27
Ano3	0.799017	1.18471	2.20724	2.05297	0	1.00148	-0.545551	0.814235	NA	1.39699	1.01815
Ano4	23.9705	24.8788	23.176	32.8476	28.9591	32.0474	0.379169	0.447691	NA	24.0084	31.2847
Ano6	609.65	499.946	622.441	509.138	486.735	548.812	-0.164361	0.339025	NA	577.345	514.895
Ano7	3.19607	0	1.10362	3.07946	7.79668	3.00444	1.57263	0.326214	NA	1.43323	4.62686
Ano8	156.607	165.859	172.164	165.264	128.088	173.256	-0.09871	0.659144	NA	164.877	155.536
Ano9	3.99508	2.36941	1.10362	3.07946	0	5.0074	-0.496083	0.742207	NA	2.48937	2.69562
Anp32a	632.821	553.257	620.233	480.396	484.508	580.859	-0.230434	0.135596	NA	602.104	515.254
Anp32b	505.778	421.755	535.255	276.125	257.29	378.56	-0.699119	7.13321e-05	NA	487.596	303.992
Anp32e	508.175	567.474	507.664	398.277	377.582	409.606	-0.418388	0.00799433	NA	527.771	395.155
Anpep	834.173	689.499	902.76	793.474	569.158	692.023	-0.244502	0.126691	NA	808.811	684.885
Antxr1	170.191	180.075	235.071	219.668	191.576	176.261	0.0206629	0.922555	NA	195.112	195.835
Antxr2	251.69	240.495	282.526	268.94	248.38	241.357	-0.0291361	0.883585	NA	258.237	252.892
Anxa1	2444.99	2364.67	3191.66	2271.62	2543.94	2646.91	-0.0845236	0.493016	0.858636	2667.11	2487.49
Anxa11	674.37	666.989	503.25	601.521	507.898	595.881	-0.10791	0.48511	NA	614.87	568.433
Anxa2	1882.48	1775.87	1458.98	1461.72	1780.98	1836.72	-0.00167747	0.993553	0.999277	1705.78	1693.14
Anxa3	197.357	252.342	260.454	228.907	353.078	229.339	0.173008	0.588103	NA	236.718	270.441
Anxa4	1254.46	1284.22	1296.75	1160.96	1057.01	1189.76	-0.172382	0.16294	0.645972	1278.48	1135.91
Anxa5	1920.84	2173.93	2105.7	1676.25	1611.68	2002.96	-0.233868	0.0839149	0.54579	2066.82	1763.63
Anxa6	3199.26	3409.58	2904.72	2415.32	2131.83	2936.34	-0.35769	0.00514668	0.148844	3171.19	2494.5
Anxa7	2285.99	2368.23	2260.21	2383.5	2198.66	2410.56	0.0146944	0.888577	0.965313	2304.81	2330.91
Anxa8	7.99017	8.29294	0	4.10595	3.34143	5.0074	-0.00976737	0.993802	NA	5.4277	4.1516
Anxa9	15.9803	16.5859	18.7615	28.7416	20.0486	19.0281	0.405696	0.485272	NA	17.1092	22.6061
Aoah	52.7351	31.987	34.2122	36.9535	50.1215	34.0504	0.0109653	0.979452	NA	39.6448	40.3751
Aoc1	3.99508	1.18471	3.31085	2.05297	3.34143	0	-1.12978	0.493859	NA	2.83021	1.79814
Aoc2	27.1666	20.14	33.1085	53.3773	25.6177	41.0607	0.557563	0.22716	NA	26.805	40.0186
Aoc3	77.5046	214.432	101.533	111.887	192.689	114.169	0.0552436	0.884883	NA	131.156	139.582
Aox1	84.6958	93.5917	103.74	118.046	114.723	106.157	0.267585	0.358893	NA	94.0092	112.975
Aox2	41.5489	45.0188	59.5954	42.086	38.9834	39.0578	-0.262988	0.492198	NA	48.721	40.0424
Aox3	372.342	325.794	384.059	400.33	246.152	399.591	-0.0847964	0.744807	NA	360.732	348.691
Aox4	71.9115	71.0823	120.294	74.9336	102.471	75.1111	-0.0415725	0.897601	NA	87.7627	84.1718
Ap1ar	817.394	912.223	902.76	672.349	686.108	828.225	-0.270766	0.0489811	0.452643	877.459	728.894
Ap1b1	1005.16	1152.72	892.827	986.454	814.196	1112.65	-0.0739183	0.571147	0.894999	1016.9	971.098
Ap1g1	2157.34	2245.02	2595.71	2211.05	2225.39	2257.34	-0.0585516	0.576247	0.895435	2332.69	2231.26
Ap1g2	274.862	219.171	254.936	278.178	218.307	287.425	0.0499379	0.793888	NA	249.656	261.303
Ap1m1	183.774	162.305	104.844	188.874	189.348	143.212	0.237473	0.301861	NA	150.307	173.811
Ap1m2	1574.06	1739.15	1630.04	1362.15	1427.91	1530.26	-0.195274	0.0981539	0.572244	1647.75	1440.11
Ap1s1	234.911	244.049	199.755	163.211	184.893	187.277	-0.337832	0.101829	NA	226.238	178.46
Ap1s2	85.4948	90.0376	79.4605	106.755	124.747	66.0977	0.186913	0.523416	NA	84.9976	99.1997
Ap1s3	233.313	199.031	292.459	244.304	247.266	171.253	-0.126091	0.533285	NA	241.601	220.941
Ap2a1	377.136	382.66	245.003	344.9	276.225	395.585	0.0237463	0.887033	NA	334.933	338.903
Ap2a2	1395.88	1483.25	1276.89	1259.5	1100.45	1416.09	-0.145762	0.20254	0.695388	1385.34	1258.68
Ap2b1	2137.37	2182.23	2190.68	1910.29	1763.16	2305.41	-0.132609	0.239751	0.722137	2170.09	1992.95
Ap2m1	743.085	783.09	657.756	664.137	687.221	773.143	-0.039179	0.779933	0.95087	727.977	708.167
Ap2s1	360.357	385.029	254.936	257.648	265.087	278.412	-0.300188	0.106089	NA	333.441	267.049
Ap3b1	1121.82	1097.04	1423.67	1167.12	1077.06	1303.93	-0.0330477	0.79416	0.95087	1214.17	1182.7
Ap3b2	7.19115	5.92353	4.41447	6.15892	1.11381	5.0074	-0.67188	0.602871	NA	5.84305	4.09338
Ap3d1	1981.56	1859.99	1770.2	2016.02	1525.92	2324.44	0.0385904	0.732887	0.94248	1870.58	1955.46
Ap3m1	842.164	881.421	918.21	938.209	884.366	911.348	0.0512228	0.73843	0.944481	880.598	911.308
Ap3m2	90.2889	82.9294	69.5279	87.2514	77.9668	67.0992	-0.05927	0.846533	NA	80.9154	77.4391
Ap3s1	425.876	467.959	505.457	416.754	570.271	403.597	-0.0186525	0.909389	NA	466.431	463.541
Ap3s2	373.141	383.845	396.199	355.165	301.843	350.518	-0.197344	0.251626	NA	384.395	335.842
Ap4b1	299.631	283.145	336.604	317.184	280.68	281.416	-0.061311	0.737825	NA	306.46	293.094
Ap4e1	214.935	199.031	280.319	307.946	317.436	297.44	0.426476	0.0211864	NA	231.428	307.607
Ap4m1	155.009	146.903	195.34	182.715	152.592	180.267	0.0574877	0.788181	NA	165.751	171.858
Ap4s1	239.705	236.941	274.801	249.436	276.225	217.321	-0.0166142	0.928716	NA	250.482	247.661
Ap5b1	125.446	146.903	75.046	127.284	108.04	128.19	0.115809	0.656375	NA	115.798	121.171
Ap5m1	386.724	439.526	501.043	478.343	544.654	459.68	0.165812	0.279665	NA	442.431	494.225
Ap5s1	151.813	126.763	144.574	133.443	121.405	144.213	-0.0945377	0.696814	NA	141.05	133.021
Ap5z1	141.426	98.3306	77.2533	134.47	123.633	114.169	0.252921	0.359808	NA	105.67	124.091
Apaf1	198.955	176.521	228.449	220.695	263.973	189.28	0.153878	0.442755	NA	201.308	224.649
Apba1	43.9459	58.0506	58.4918	55.4303	34.5281	57.0844	-0.151834	0.677989	NA	53.4961	49.0143
Apba2	5.59312	9.47764	6.62171	6.15892	10.0243	10.0148	0.2823	0.758889	NA	7.23082	8.73268
Apba3	186.97	248.788	99.3256	142.682	151.478	199.295	-0.0396849	0.862984	NA	178.361	164.485
Apbb1	35.1567	35.5412	23.176	27.7151	45.6663	49.0726	0.405034	0.374132	NA	31.2913	40.818
Apbb1ip	51.1371	33.1718	30.9013	78.013	99.1292	38.0563	0.832857	0.0303187	NA	38.4034	71.7328
Apbb2	327.597	267.743	353.158	313.079	261.746	337.499	-0.0633591	0.72153	NA	316.166	304.108
Apbb3	143.024	118.471	183.201	233.013	151.478	232.344	0.458724	0.0485705	NA	148.232	205.611
Apc	2538.48	2467.74	3129.86	2449.2	2040.5	2684.97	-0.183783	0.0834035	0.54579	2712.03	2391.56
Apc2	29.5636	22.5094	16.5543	39.0065	23.39	34.0504	0.486975	0.346635	NA	22.8758	32.149
Apcdd1	47.142	22.5094	46.352	34.9006	44.5524	51.0755	0.16426	0.711995	NA	38.6678	43.5095
Apeh	435.464	388.583	360.883	427.019	357.533	423.626	0.0240388	0.887277	NA	394.977	402.726
Apex1	47.142	52.127	35.3158	35.927	35.642	43.0637	-0.219815	0.58898	NA	44.8616	38.2109
Apex2	68.7154	90.0376	69.5279	79.0395	67.9425	62.0918	-0.120128	0.712565	NA	76.0937	69.6913
Aph1a	356.361	375.552	290.252	332.582	298.501	394.583	-0.000991806	0.995436	NA	340.722	341.889
Aph1b	242.901	276.036	272.594	223.774	268.428	223.33	-0.147233	0.446944	NA	263.844	238.511
Aph1c	566.503	574.582	726.181	558.409	580.296	551.816	-0.132719	0.452792	NA	622.422	563.507
Api5	1224.89	1338.72	1450.15	1283.11	1518.12	1270.88	0.0214456	0.857505	0.964985	1337.92	1357.37
Apip	138.23	182.445	119.191	133.443	207.169	149.221	0.148721	0.568458	NA	146.622	163.278
Apitd1	15.1813	11.8471	4.41447	11.2914	17.821	7.01037	0.262977	0.751097	NA	10.4809	12.0409
Aplf	98.279	114.916	103.74	100.596	99.1292	109.161	-0.0368126	0.89186	NA	105.645	102.962
Apln	3.99508	9.47764	3.31085	8.2119	8.91049	5.0074	0.455969	0.65845	NA	5.59453	7.3766
Aplnr	27.1666	39.0953	36.4194	37.98	43.4386	31.0459	0.118174	0.816401	NA	34.2271	37.4882
Aplp1	23.1715	26.0635	28.6941	17.4503	22.2762	22.0326	-0.342874	0.524969	NA	25.9764	20.5864
Aplp2	6678.98	7484.97	7229.8	6093.23	5648.14	7944.75	-0.135033	0.304836	0.767099	7131.25	6562.04
Apmap	713.522	1015.29	741.631	695.958	632.645	805.191	-0.21844	0.21919	0.710773	823.482	711.265
Apoa1bp	661.586	741.626	663.275	592.283	742.912	686.014	-0.0335822	0.828484	NA	688.829	673.737
Apoa2	4.7941	8.29294	5.51809	4.10595	4.45524	3.00444	-0.692753	0.538222	NA	6.20171	3.85521
Apobec1	174.186	127.948	161.128	171.423	239.469	160.237	0.280561	0.230896	NA	154.421	190.377
Apobec2	14.3823	23.6941	23.176	25.6622	36.7558	15.0222	0.269657	0.639937	NA	20.4175	25.8134
Apobec3	491.395	362.52	427.1	514.27	605.913	355.526	0.178944	0.275251	NA	427.005	491.903
Apobr	188.568	161.12	144.574	131.39	128.088	133.197	-0.332366	0.172352	NA	164.754	130.892
Apoc1	283.651	516.532	186.511	239.171	355.306	186.275	-0.327465	0.272096	NA	328.898	260.251
Apod	1242.47	2024.66	1127.9	776.024	718.408	1246.84	-0.695212	5.68591e-05	0.0223314	1465.01	913.759
Apoe	3043.45	3715.24	1590.31	2323.97	3037.36	1915.83	-0.143103	0.269761	0.749414	2783	2425.72
Apof	226.122	238.126	177.683	138.576	106.926	172.255	-0.639632	0.0038391	NA	213.977	139.252
Apoh	2.39705	1.18471	2.20724	1.02649	1.11381	1.00148	-0.919713	0.621125	NA	1.92966	1.04726
Apol10a	14.3823	8.29294	18.7615	64.6687	28.9591	25.037	1.47165	0.0539922	NA	13.8122	39.5549
Apol10b	16.7793	10.6623	8.82895	15.3973	14.4795	13.0193	0.2453	0.736473	NA	12.0902	14.2987
Apol11b	11.1862	5.92353	4.41447	7.18541	6.68287	2.00296	-0.53426	0.605605	NA	7.17474	5.29041
Apol6	15.9803	29.6176	9.93256	27.7151	49.0077	20.0296	0.65061	0.349914	NA	18.5102	32.2508
Apol7a	307.621	387.399	352.054	458.84	281.794	443.656	0.154238	0.383349	NA	349.025	394.763
Apol7c	66.3184	2.36941	5.51809	92.3838	192.689	6.00889	1.85158	0.129962	NA	24.7353	97.0273
Apol7e	7.19115	3.55412	7.72533	20.5297	27.8453	0	0.876803	0.416141	NA	6.15686	16.125
Apol9a	11.1862	13.0318	1.10362	14.3708	11.1381	16.0237	1.14315	0.218428	NA	8.44054	13.8442
Apol9b	18.3774	3.55412	1.10362	5.13243	0	7.01037	-1.2588	0.335176	NA	7.67837	4.0476
Apold1	12.7843	17.7706	17.6579	37.98	17.821	17.0252	0.604933	0.38444	NA	16.0709	24.2754
Apom	4.7941	1.18471	3.31085	12.3178	4.45524	3.00444	1.0678	0.3862	NA	3.09655	6.59251
Apoo	75.9066	93.5917	66.2171	71.8541	96.9016	48.0711	-0.167772	0.607175	NA	78.5718	72.2756
Apool	224.524	223.909	245.003	180.662	253.949	209.31	-0.108821	0.603182	NA	231.145	214.64
Apopt1	230.916	255.896	242.796	264.834	317.436	224.332	0.134273	0.488889	NA	243.203	268.867
App	17007.1	17581	16312.6	13432.6	12517	17947.5	-0.231659	0.0306687	0.363626	16966.9	14632.4
Appbp2	545.728	598.276	615.819	574.833	615.938	588.871	0.0185456	0.895724	NA	586.608	593.214
Appbp2os	24.7695	10.6623	17.6579	21.5562	25.6177	21.0311	0.347351	0.554614	NA	17.6966	22.735
Appl1	572.096	550.888	722.87	684.667	682.766	597.884	0.101122	0.456765	NA	615.285	655.106
Appl2	1910.45	1472.59	2692.83	2539.53	2102.88	2495.69	0.260949	0.0610144	0.492821	2025.29	2379.36
Aprt	111.063	108.993	60.699	97.5163	120.292	99.1466	0.218556	0.425372	NA	93.5851	105.651
Aptx	382.729	399.246	465.727	402.383	377.582	427.632	-0.0450082	0.793456	NA	415.901	402.532
Aqp1	157.406	311.578	89.3931	208.377	434.386	170.252	0.537269	0.0629254	NA	186.126	271.005
Aqp11	4.7941	1.18471	1.10362	5.13243	6.68287	4.00592	1.20524	0.356901	NA	2.36081	5.27374
Aqp2	7.99017	1.18471	9.93256	11.2914	5.56906	12.0178	0.558932	0.561247	NA	6.36915	9.62606
Aqp3	1.59803	0	0	6.15892	7.79668	0	2.63536	0.280384	NA	0.532678	4.65187
Aqp4	23.1715	9.47764	25.3832	21.5562	20.0486	18.0267	0.0577013	0.928166	NA	19.3441	19.8772
Aqp5	4950.71	5048.03	2952.18	3655.32	2915.96	4436.56	-0.218787	0.159767	0.644405	4316.97	3669.28
Aqp7	3.99508	101.885	12.1398	16.4238	69.0563	24.0355	-0.369763	0.808698	NA	39.3399	36.5052
Aqp9	2.39705	1.18471	4.41447	3.07946	4.45524	0	-0.459893	0.808203	NA	2.66541	2.51157
Aqr	751.076	713.193	835.439	762.68	623.734	733.084	-0.119282	0.373032	0.804544	766.569	706.499
Ar	1558.08	1624.23	1807.73	1360.1	1139.43	1383.05	-0.364932	0.00286013	0.112392	1663.35	1294.19
Araf	852.551	825.74	845.372	926.918	799.716	910.346	0.0588667	0.655581	0.92255	841.221	878.993
Arap1	980.393	855.357	801.227	890.991	760.733	913.351	-0.0460673	0.738872	0.944481	878.993	855.025
Arap2	639.213	640.926	768.118	590.23	776.326	579.857	-0.0755416	0.590173	NA	682.752	648.805
Arap3	76.7056	73.4517	75.046	71.8541	101.357	69.1022	0.0877803	0.783015	NA	75.0678	80.771
Arc	538.537	736.887	634.58	549.171	376.468	497.736	-0.43406	0.0152941	NA	636.668	474.458
Arcn1	5792.07	5780.18	6585.29	5460.91	5004.35	5835.63	-0.155655	0.135618	0.61878	6052.51	5433.63
Arel1	753.473	771.243	736.113	781.157	722.863	818.21	0.0359236	0.781374	0.95087	753.61	774.077
Arf1	4679.84	5097.79	4226.86	3813.4	4011.95	4488.64	-0.184613	0.121818	0.60196	4668.16	4104.66
Arf2	234.112	235.756	207.48	221.721	257.29	221.327	0.0483112	0.801497	NA	225.783	233.446
Arf3	1217.7	1169.3	1221.71	1010.06	786.351	1104.63	-0.331877	0.00671809	0.174448	1202.9	967.016
Arf4	3053.04	3183.3	3027.22	2765.36	3267.92	2954.37	-0.0440969	0.767582	0.950628	3087.86	2995.88
Arf5	596.066	623.155	495.525	449.601	497.874	469.695	-0.2697	0.133934	NA	571.582	472.39
Arf6	3395.82	3526.87	3496.26	3158.5	2569.56	3357.97	-0.207781	0.0512282	0.465205	3472.98	3028.68
Arfgap1	836.57	644.48	694.176	740.097	639.328	881.303	0.0406383	0.816196	0.956541	725.075	753.576
Arfgap2	544.929	521.27	510.975	608.707	575.84	584.865	0.16584	0.259957	NA	525.725	589.804
Arfgap3	2850.09	2701.13	2697.24	2838.24	2396.92	2979.41	-0.0142619	0.892602	0.966089	2749.49	2738.19
Arfgef1	3183.28	3240.17	4041.45	3469.53	3324.73	3286.86	-0.0438999	0.660373	0.92357	3488.3	3360.37
Arfgef2	3765.77	3738.93	4431.03	3700.49	2985.01	4152.14	-0.15118	0.164385	0.648053	3978.57	3612.55
Arfgef3	1833.74	1878.94	2035.07	2004.73	1435.7	2275.36	-0.0338699	0.814811	0.955491	1915.92	1905.27
Arfip1	651.998	671.728	789.087	623.078	622.62	652.966	-0.147668	0.284312	NA	704.271	632.888
Arfip2	1302.4	1416.91	1164.32	1209.2	1103.79	1389.05	-0.0718065	0.683811	0.928139	1294.54	1234.01
Arfrp1	274.063	265.374	286.941	313.079	328.574	329.487	0.233886	0.189674	NA	275.459	323.713
Arg1	769.453	640.926	1079.34	834.534	965.674	863.277	0.13011	0.357114	NA	829.906	887.828
Arg2	23.1715	24.8788	34.2122	21.5562	26.7315	20.0296	-0.252671	0.641984	NA	27.4208	22.7724
Arglu1	810.203	701.346	1040.71	1041.88	879.911	1060.57	0.23686	0.0687013	0.510306	850.754	994.121
Arhgap1	659.988	676.467	653.342	597.415	555.792	730.08	-0.0893583	0.536726	NA	663.266	627.762
Arhgap10	166.994	165.859	162.232	140.629	149.251	186.275	-0.0619447	0.804641	NA	165.028	158.718
Arhgap11a	89.4899	48.5729	65.1135	67.7481	89.1049	55.0815	0.0355961	0.916946	NA	67.7254	70.6448
Arhgap12	1623.6	1806.68	2068.18	1620.82	1718.61	1666.46	-0.127869	0.264876	0.749135	1832.82	1668.63
Arhgap15	165.396	67.5282	59.5954	170.397	325.233	59.0874	0.737362	0.0313314	NA	97.5067	184.906
Arhgap15os	1.59803	0	1.10362	9.23838	10.0243	1.00148	2.63643	0.133374	NA	0.90055	6.75472
Arhgap17	251.69	152.827	258.247	278.178	294.046	171.253	0.149962	0.534046	NA	220.921	247.826
Arhgap18	1013.95	1149.16	1336.48	994.666	942.284	972.438	-0.25821	0.0582545	0.484875	1166.53	969.796
Arhgap19	156.607	181.26	151.196	148.841	139.226	127.188	-0.233958	0.304996	NA	163.021	138.418
Arhgap20	24.7695	43.8341	51.8701	23.6092	21.1624	34.0504	-0.600604	0.211055	NA	40.1579	26.274
Arhgap21	2129.38	2305.44	2144.33	2970.65	1827.76	2453.63	0.127224	0.488153	0.858636	2193.05	2417.35
Arhgap22	46.343	10.6623	19.8651	30.7946	15.5934	28.0415	-0.110091	0.861029	NA	25.6235	24.8098
Arhgap23	118.254	77.0059	96.0148	93.4103	79.0806	102.151	-0.103182	0.736358	NA	97.0917	91.5473
Arhgap24	197.357	200.215	194.237	178.609	161.503	152.225	-0.264554	0.247709	NA	197.27	164.112
Arhgap25	150.215	45.0188	52.9737	111.887	217.193	40.0592	0.387622	0.315667	NA	82.7359	123.046
Arhgap26	970.006	938.287	1220.6	1071.65	1009.11	1004.49	-0.012118	0.942893	0.984718	1042.96	1028.42
Arhgap27	153.411	114.916	88.2895	133.443	147.023	120.178	0.186637	0.462052	NA	118.872	133.548
Arhgap27os3	12.7843	4.73882	11.0362	19.5033	15.5934	5.0074	0.41897	0.621306	NA	9.51976	13.368
Arhgap28	37.5538	26.0635	30.9013	27.7151	36.7558	20.0296	-0.198027	0.695187	NA	31.5062	28.1668
Arhgap29	2006.33	2005.71	2584.67	2147.41	1989.27	1777.63	-0.145567	0.287492	0.757167	2198.9	1971.44
Arhgap30	337.984	138.611	112.569	304.867	434.386	137.203	0.547587	0.0496782	NA	196.388	292.152
Arhgap31	250.891	206.139	184.304	211.456	288.477	151.224	-0.014267	0.943589	NA	213.778	217.052
Arhgap32	1231.28	1283.04	1555	1306.72	933.374	1351	-0.191288	0.119626	0.601348	1356.44	1197.03
Arhgap33	3.19607	3.55412	5.51809	4.10595	1.11381	6.00889	-0.381917	0.757052	NA	4.08942	3.74288
Arhgap35	1312.78	1304.36	1458.98	1132.22	1014.68	1326.96	-0.239028	0.0382494	0.408783	1358.71	1157.95
Arhgap39	115.058	119.655	78.3569	99.5692	90.2187	109.161	-0.049931	0.850393	NA	104.357	99.6498
Arhgap4	189.367	37.9106	62.9062	209.403	323.005	73.1081	0.955121	0.0195141	NA	96.7279	201.839
Arhgap42	455.439	505.869	685.347	661.058	586.978	594.88	0.183026	0.230135	NA	548.885	614.305
Arhgap44	414.69	414.647	347.64	381.853	249.494	415.615	-0.200182	0.230727	NA	392.325	348.987
Arhgap5	4362.63	4849	5885.6	4923.03	5484.41	4722.98	0.0123692	0.905822	0.970039	5032.41	5043.47
Arhgap6	81.4997	67.5282	82.7714	85.1984	76.853	73.1081	0.0209792	0.945969	NA	77.2664	78.3865
Arhgap8	185.372	162.305	172.164	132.417	123.633	179.265	-0.278769	0.235057	NA	173.28	145.105
Arhgap9	389.121	313.947	370.816	395.197	406.541	356.527	0.106997	0.528454	NA	357.961	386.089
Arhgdia	1362.32	1477.33	982.22	1137.35	975.699	1229.82	-0.181811	0.143953	0.624726	1273.96	1114.29
Arhgdib	396.312	131.502	129.123	285.363	578.068	93.1377	0.338891	0.259364	NA	218.979	318.856
Arhgdig	155.009	176.521	119.191	137.549	104.698	138.204	-0.237927	0.360762	NA	150.24	126.817
Arhgef1	404.302	260.635	203.066	400.33	414.338	286.424	0.367073	0.0821129	NA	289.334	367.03
Arhgef10	1578.86	1546.04	1715.02	1349.83	1023.59	1586.35	-0.316646	0.00840307	0.190093	1613.31	1319.92
Arhgef10l	773.448	1002.26	598.161	598.442	501.215	717.06	-0.377623	0.0269985	0.340637	791.29	605.572
Arhgef11	640.811	633.817	656.653	653.872	497.874	733.084	-0.0569364	0.675824	NA	643.761	628.277
Arhgef12	3071.42	3205.81	3542.61	2952.18	2570.68	3387.01	-0.14815	0.174048	0.662329	3273.28	2969.95
Arhgef15	35.1567	35.5412	34.2122	39.0065	42.3248	51.0755	0.329791	0.435677	NA	34.97	44.1356
Arhgef16	333.989	356.596	259.35	270.993	236.128	362.536	-0.141809	0.413344	NA	316.645	289.886
Arhgef17	285.249	302.1	245.003	242.251	169.299	287.425	-0.286625	0.158705	NA	277.451	232.992
Arhgef18	1297.6	1153.9	1258.12	1361.12	1199.57	1347.99	0.0702385	0.622487	0.914636	1236.54	1302.9
Arhgef19	214.935	221.54	135.745	212.483	143.682	217.321	0.0131734	0.954998	NA	190.74	191.162
Arhgef2	536.14	434.787	604.783	573.806	540.198	567.84	0.0958598	0.562095	NA	525.237	560.615
Arhgef25	205.347	168.228	193.133	204.271	142.568	250.37	0.0272649	0.896079	NA	188.903	199.07
Arhgef26	51.9361	69.8976	99.3256	66.7217	69.0563	68.1007	-0.0793543	0.814241	NA	73.7198	67.9596
Arhgef28	2019.12	2136.02	2847.33	2103.27	1547.08	2359.49	-0.228466	0.0453976	0.436206	2334.16	2003.28
Arhgef3	682.36	574.582	598.161	649.766	781.895	511.757	0.0503177	0.72497	NA	618.368	647.806
Arhgef33	4.7941	5.92353	9.93256	4.10595	7.79668	6.00889	-0.143464	0.884226	NA	6.8834	5.9705
Arhgef37	127.044	170.598	144.574	127.284	92.4463	150.222	-0.282677	0.243699	NA	147.405	123.318
Arhgef38	156.607	133.872	259.35	180.662	190.462	218.323	0.148382	0.502589	NA	183.276	196.482
Arhgef39	8.78918	7.10823	7.72533	11.2914	17.821	13.0193	0.823304	0.340116	NA	7.87425	14.0439
Arhgef4	27.9656	16.5859	19.8651	18.4768	18.9348	25.037	-0.0687627	0.905136	NA	21.4722	20.8162
Arhgef40	313.215	377.921	253.832	329.502	271.77	381.564	0.0559642	0.747347	NA	314.989	327.612
Arhgef5	1423.85	1290.14	1549.48	1281.06	1036.96	1590.35	-0.148352	0.221789	0.713998	1421.16	1302.79
Arhgef6	471.42	394.507	440.344	508.111	628.19	383.567	0.195557	0.399455	NA	435.423	506.623
Arhgef7	464.229	451.373	466.831	451.654	438.842	541.801	0.0424332	0.782142	NA	460.811	477.432
Arhgef9	42.3479	52.127	35.3158	33.8741	51.2353	38.0563	-0.0754969	0.86306	NA	43.2636	41.0552
Arid1a	903.688	733.333	890.62	975.163	696.132	812.201	-0.0320804	0.839774	0.961508	842.547	827.832
Arid1b	1132.21	1061.5	1017.54	1015.2	820.879	1030.52	-0.173184	0.172253	0.661638	1070.41	955.533
Arid2	1051.51	1055.57	1241.57	1202.02	999.089	1063.57	-0.0335015	0.798603	0.95087	1116.22	1088.23
Arid3a	103.073	78.1906	87.1858	54.4038	77.9668	70.1037	-0.412502	0.186844	NA	89.4832	67.4914
Arid3b	56.7302	34.3565	44.1447	66.7217	64.601	42.0622	0.341194	0.382921	NA	45.0771	57.795
Arid4a	707.13	561.55	711.834	661.058	565.816	716.059	-0.0365987	0.810466	NA	660.171	647.644
Arid4b	1017.15	971.459	1264.75	1074.73	1064.8	1098.62	0.00356171	0.976393	0.994518	1084.45	1079.39
Arid5a	167.793	142.165	135.745	190.927	160.389	180.267	0.251458	0.278328	NA	148.568	177.194
Arid5b	208.543	175.336	222.931	249.436	236.128	181.268	0.134197	0.544368	NA	202.27	222.277
Arih1	1498.16	1503.39	1740.41	1579.76	1539.29	1514.24	-0.0289672	0.799295	0.95087	1580.65	1544.43
Arih2	703.934	728.594	802.33	791.421	768.53	919.36	0.147915	0.269048	0.749135	744.953	826.437
Arl1	1475.78	1634.89	1493.2	1392.94	1892.37	1421.1	0.0218529	0.879917	0.965257	1534.62	1568.8
Arl10	118.254	106.623	73.9424	95.4633	93.5601	102.151	-0.0163652	0.952905	NA	99.6068	97.0582
Arl11	11.9852	7.10823	9.93256	5.13243	15.5934	5.0074	-0.353186	0.67297	NA	9.67535	8.57773
Arl13a	3.19607	2.36941	7.72533	9.23838	7.79668	7.01037	1.00702	0.31264	NA	4.43027	8.01514
Arl13b	179.779	189.553	212.998	176.556	183.779	206.305	-0.0364165	0.861618	NA	194.11	188.88
Arl14ep	441.057	393.322	504.354	539.932	467.801	522.773	0.198142	0.243376	NA	446.244	510.169
Arl15	473.018	477.436	563.949	453.707	526.833	480.711	-0.0461628	0.763362	NA	504.801	487.084
Arl16	91.0879	59.2353	64.0099	81.0925	85.7635	72.1066	0.154835	0.63868	NA	71.4443	79.6542
Arl2	94.284	144.534	100.429	97.5163	90.2187	139.206	-0.0656934	0.809607	NA	113.082	108.98
Arl2bp	858.144	868.389	789.087	787.316	874.342	855.265	0.00162699	0.990613	0.998785	838.54	838.974
Arl3	147.019	157.566	113.673	126.258	168.185	152.225	0.104344	0.662303	NA	139.419	148.889
Arl4a	332.391	469.143	333.293	388.012	540.198	320.474	0.101839	0.627698	NA	378.276	416.228
Arl4c	242.901	165.859	168.854	250.463	269.542	173.256	0.251476	0.261089	NA	192.538	231.087
Arl4d	214.136	227.463	199.755	180.662	134.771	230.341	-0.272565	0.246952	NA	213.785	181.924
Arl5a	1217.7	1351.75	1321.03	1165.06	1524.81	1070.58	-0.0626441	0.61563	0.912415	1296.83	1253.48
Arl5b	390.719	517.716	536.358	539.932	505.67	481.712	0.0880123	0.598883	NA	481.598	509.105
Arl5c	39.9508	3.55412	7.72533	44.1389	84.6496	10.0148	1.28378	0.0923702	NA	17.0768	46.2678
Arl6	64.7203	60.42	76.1497	57.4833	83.5358	51.0755	-0.0865599	0.794392	NA	67.0967	64.0315
Arl6ip1	803.811	828.109	732.802	815.031	1020.25	700.035	0.0872307	0.549991	0.886202	788.241	845.106
Arl6ip4	272.465	291.438	230.656	248.41	276.225	253.375	-0.0248392	0.895209	NA	264.853	259.337
Arl6ip5	1098.65	1131.39	1045.13	865.329	1156.14	913.351	-0.164268	0.209838	0.706022	1091.72	978.272
Arl6ip6	149.416	149.273	176.579	170.397	177.096	150.222	0.0708409	0.747618	NA	158.423	165.905
Arl8a	206.146	208.508	206.377	206.324	155.934	228.338	-0.0937958	0.635872	NA	207.01	196.865
Arl8b	1741.06	2055.46	2061.56	1903.11	1984.81	1770.62	-0.0493898	0.688136	0.928139	1952.69	1886.18
Arl9	2.39705	1.18471	2.20724	3.07946	1.11381	0	-0.567899	0.810614	NA	1.92966	1.39776
Armc1	537.738	650.403	578.296	585.098	779.668	556.823	0.108298	0.488088	NA	588.812	640.53
Armc10	298.033	291.438	346.536	307.946	360.875	287.425	0.0312378	0.853634	NA	312.002	318.749
Armc2	13.5833	11.8471	24.2796	44.1389	20.0486	11.0163	0.631192	0.377356	NA	16.57	25.0679
Armc5	112.661	91.2223	62.9062	97.5163	64.601	103.153	-0.0082101	0.978907	NA	88.93	88.4233
Armc6	40.7498	50.9423	29.7977	33.8741	37.8696	34.0504	-0.17032	0.729048	NA	40.4966	35.2647
Armc7	57.5292	53.3117	51.8701	51.3243	79.0806	51.0755	0.132735	0.713409	NA	54.237	60.4935
Armc8	579.287	573.397	685.347	565.594	659.376	612.906	0.0060808	0.965237	NA	612.677	612.626
Armc9	49.539	53.3117	57.3881	66.7217	69.0563	68.1007	0.351392	0.304254	NA	53.413	67.9596
Armcx1	63.1223	50.9423	89.3931	63.6422	62.3734	56.0829	-0.137407	0.698927	NA	67.8192	60.6995
Armcx2	87.8918	88.8529	94.9112	98.5428	124.747	72.1066	0.0925117	0.746816	NA	90.552	98.4654
Armcx3	395.513	342.38	396.199	316.158	340.826	407.603	-0.0957731	0.58358	NA	378.031	354.862
Armcx4	64.7203	29.6176	38.6266	72.8806	72.3977	39.0578	0.449627	0.297503	NA	44.3215	61.4454
Armcx5	74.3085	65.1588	107.051	83.1454	73.5115	71.1051	-0.0856557	0.778077	NA	82.1728	75.9207
Armcx6	23.9705	21.3247	18.7615	15.3973	18.9348	20.0296	-0.235631	0.698188	NA	21.3522	18.1206
Armt1	135.034	112.547	115.88	115.993	153.706	119.176	0.0881439	0.73318	NA	121.154	129.625
Arnt	601.66	625.525	665.482	636.422	579.182	641.949	-0.0275163	0.841856	NA	630.889	619.184
Arnt2	5.59312	5.92353	4.41447	7.18541	12.2519	9.01333	0.831295	0.389241	NA	5.31037	9.48355
Arntl	57.5292	48.5729	71.7352	36.9535	49.0077	31.0459	-0.605205	0.165478	NA	59.2791	39.0024
Arntl2	25.5685	26.0635	34.2122	25.6622	26.7315	26.0385	-0.113431	0.819677	NA	28.6147	26.144
Arpc1a	1292.01	1651.48	1148.87	1179.43	1485.82	1134.68	-0.107236	0.448381	0.848886	1364.12	1266.65
Arpc1b	1848.13	2000.97	1197.43	1400.13	1543.74	1602.37	-0.119818	0.367594	0.803022	1682.17	1515.41
Arpc2	1291.21	1187.07	1268.06	1138.37	1215.17	1153.71	-0.0941955	0.466907	0.854907	1248.78	1169.08
Arpc3	1247.26	1224.99	962.355	956.686	1155.02	982.453	-0.144709	0.281473	0.753795	1144.87	1031.39
Arpc4	505.778	526.009	432.618	456.787	534.629	430.637	-0.0430582	0.789188	NA	488.135	474.018
Arpc5	1385.49	1444.16	1466.71	1439.13	2095.08	1197.77	0.103905	0.375681	0.806877	1432.12	1577.33
Arpc5l	517.763	582.875	598.161	566.621	721.75	509.754	0.0712708	0.630246	NA	566.266	599.375
Arpin	351.567	343.565	327.775	284.337	272.884	314.465	-0.231298	0.318555	NA	340.969	290.562
Arpp19	648.003	728.594	675.414	595.362	748.481	556.823	-0.119394	0.400402	NA	684.004	633.556
Arpp21	7.99017	4.73882	2.20724	10.2649	7.79668	6.00889	0.800098	0.37506	NA	4.97874	8.02348
Arr3	1.59803	2.36941	2.20724	4.10595	1.11381	3.00444	0.329372	0.839449	NA	2.05823	2.7414
Arrb1	1893.67	1778.24	2018.52	1519.2	1433.47	1795.66	-0.26778	0.018494	0.284844	1896.81	1582.78
Arrb2	225.323	168.228	136.849	217.615	219.421	187.277	0.248299	0.257287	NA	176.8	208.104
Arrdc1	386.724	290.253	294.666	382.88	324.119	421.623	0.203126	0.258848	NA	323.881	376.207
Arrdc2	124.647	88.8529	82.7714	143.708	108.04	112.166	0.298776	0.308306	NA	98.757	121.305
Arrdc3	2181.32	2125.36	3236.91	2602.14	3088.6	2538.75	0.147311	0.30618	0.768354	2514.53	2743.17
Arrdc4	329.994	438.341	518.701	458.84	435.5	352.521	-0.0357357	0.854592	NA	429.012	415.62
Arrdc5	22.3725	21.3247	39.7303	39.0065	21.1624	26.0385	0.0880468	0.870683	NA	27.8091	28.7358
Arsa	123.848	120.84	78.3569	89.3044	132.544	123.182	0.117435	0.671554	NA	107.681	115.01
Arsb	224.524	206.139	254.936	203.244	249.494	165.244	-0.16261	0.426719	NA	228.533	205.994
Arsg	84.6958	73.4517	92.7039	111.887	79.0806	95.1407	0.182603	0.573565	NA	83.6171	95.3695
Arsi	6.39213	1.18471	3.31085	6.15892	7.79668	2.00296	0.423875	0.729728	NA	3.62923	5.31952
Arsj	9.5882	15.4012	6.62171	4.10595	16.7072	12.0178	0.0780232	0.928201	NA	10.537	10.9436
Arsk	206.146	193.107	241.692	227.88	206.055	194.287	-0.0227137	0.921965	NA	213.649	209.407
Art2a-ps	3.99508	0	0	10.2649	25.6177	1.00148	3.10985	0.0273886	NA	1.33169	12.2947
Art2b	4.7941	0	0	13.3443	21.1624	0	3.25139	0.375268	NA	1.59803	11.5022
Art3	104.671	132.687	72.8388	94.4368	112.495	98.1451	-0.00670029	0.983555	NA	103.399	101.692
Art4	61.5243	35.5412	43.0411	48.2449	55.6906	46.0681	0.0892067	0.826716	NA	46.7022	50.0012
Art5	1.59803	1.18471	1.10362	2.05297	2.22762	1.00148	0.389943	0.863375	NA	1.29545	1.76069
Artn	1.59803	1.18471	2.20724	1.02649	2.22762	1.00148	-0.277368	0.894638	NA	1.66333	1.41853
Arv1	28.7646	22.5094	27.5905	50.2979	41.211	25.037	0.547778	0.236658	NA	26.2882	38.8486
Arvcf	110.264	97.1459	89.3931	57.4833	59.032	115.17	-0.423379	0.167489	NA	98.9344	77.2285
Arxes1	5.59312	11.8471	2.20724	2.05297	18.9348	5.0074	0.138027	0.90224	NA	6.54914	8.66506
Arxes2	23.9705	66.3435	29.7977	35.927	90.2187	33.0489	0.200962	0.727063	NA	40.0372	53.0649
As3mt	242.102	232.202	291.355	259.701	238.356	247.366	-0.0324582	0.858603	NA	255.22	248.474
Asah1	1099.45	1060.31	1218.39	1120.92	1325.44	1040.54	0.0433397	0.714271	0.93601	1126.05	1162.3
Asah2	1191.33	1117.18	1612.39	1312.88	1045.87	1366.02	-0.0670117	0.583397	0.899202	1306.97	1241.59
Asap1	166.195	110.178	156.714	202.218	243.925	140.207	0.411335	0.0764944	NA	144.362	195.45
Asap2	75.1076	62.7894	75.046	73.9071	80.1944	78.1155	0.124829	0.685831	NA	70.981	77.4057
Asap3	272.465	265.374	304.599	265.86	218.307	289.428	-0.133911	0.502486	NA	280.812	257.865
Asb1	365.151	369.628	321.153	303.84	403.2	395.585	0.0637349	0.724755	NA	351.977	367.542
Asb10	4.7941	2.36941	1.10362	9.23838	1.11381	4.00592	0.601902	0.702358	NA	2.75571	4.78604
Asb13	186.97	219.171	198.651	172.45	216.079	193.286	-0.0551969	0.790779	NA	201.597	193.938
Asb14	4.7941	2.36941	6.62171	10.2649	5.56906	8.01185	0.776303	0.441591	NA	4.59507	7.94859
Asb15	2.39705	0	0	4.10595	1.11381	0	1.39195	0.556669	NA	0.799017	1.73992
Asb16	8.78918	7.10823	1.10362	9.23838	2.22762	7.01037	0.316026	0.775953	NA	5.66701	6.15879
Asb2	73.5095	82.9294	55.1809	73.9071	53.4629	72.1066	-0.0787582	0.805509	NA	70.5399	66.4922
Asb3	174.985	159.935	241.692	201.191	182.665	181.268	-0.00792866	0.969711	NA	192.204	188.375
Asb4	1.59803	2.36941	1.10362	2.05297	3.34143	0	-0.459472	0.838538	NA	1.69035	1.79814
Asb5	3.99508	8.29294	6.62171	6.15892	6.68287	5.0074	-0.0698335	0.944589	NA	6.30324	5.94973
Asb6	156.607	155.196	73.9424	159.105	122.519	145.215	0.216385	0.383059	NA	128.582	142.28
Asb7	360.357	335.272	412.753	286.39	277.339	350.518	-0.281147	0.094739	NA	369.46	304.749
Asb8	401.106	392.138	346.536	377.747	366.444	389.576	-0.00767772	0.961884	NA	379.927	377.922
Ascc1	213.337	225.094	179.89	218.642	188.234	212.314	0.00475296	0.981058	NA	206.107	206.397
Ascc2	246.896	232.202	222.931	251.489	222.762	250.37	0.0423951	0.820107	NA	234.01	241.541
Ascc3	1848.92	1870.65	2202.82	1788.14	1729.75	1973.92	-0.104939	0.424708	0.843486	1974.13	1830.6
Ascl2	3.19607	1.18471	3.31085	2.05297	0	4.00592	-1.14107	0.559337	NA	2.56388	2.01963
Ascl3	224.524	357.781	228.449	273.046	222.762	232.344	-0.141984	0.556184	NA	270.251	242.717
Ascl4	3.99508	4.73882	7.72533	7.18541	2.22762	8.01185	-0.0220985	0.985852	NA	5.48641	5.80829
Asf1a	230.916	212.062	278.112	248.41	304.07	229.339	0.116792	0.535145	NA	240.363	260.606
Asf1b	28.7646	13.0318	2.20724	20.5297	27.8453	10.0148	0.829647	0.241345	NA	14.6679	19.4633
Asgr1	162.2	177.706	144.574	109.834	198.258	136.201	-0.141022	0.610459	NA	161.493	148.098
Asgr2	9.5882	4.73882	5.51809	6.15892	7.79668	3.00444	-0.302915	0.779344	NA	6.61504	5.65335
Ash1l	2280.39	2022.29	2817.54	2510.79	2278.86	2298.4	0.00544203	0.964243	0.99135	2373.41	2362.68
Ash2l	530.547	453.742	627.959	544.038	506.784	510.755	-0.0362099	0.804332	NA	537.416	520.526
Asic1	84.6958	77.0059	77.2533	75.96	62.3734	76.1126	-0.164154	0.583002	NA	79.6516	71.482
Asic2	2.39705	0	2.20724	2.05297	5.56906	0	-0.0800881	0.970718	NA	1.53476	2.54068
Asic3	12.7843	9.47764	8.82895	15.3973	11.1381	17.0252	0.453858	0.538981	NA	10.3636	14.5202
Asic5	2.39705	0	2.20724	1.02649	4.45524	0	-0.459575	0.870125	NA	1.53476	1.82724
Asl	365.151	350.673	275.905	299.734	288.477	363.538	-0.0603261	0.72291	NA	330.576	317.25
Asna1	457.038	565.105	343.225	395.197	445.524	442.655	-0.0664336	0.694485	NA	455.122	427.792
Asns	5457.28	3858.59	4791.91	6126.07	4083.23	6528.65	0.213983	0.271825	0.750553	4702.59	5579.32
Asnsd1	693.546	617.232	792.398	808.872	1013.57	671.994	0.23611	0.0708184	0.515195	701.059	831.478
Aspa	55.1321	122.025	62.9062	57.4833	118.064	73.1081	0.00482644	0.99106	NA	80.021	82.8851
Aspg	3.19607	23.6941	1.10362	8.2119	21.1624	20.0296	1.15245	0.236812	NA	9.33127	16.468
Asph	2692.69	2344.53	2745.8	2412.24	2604.09	3278.85	0.0906465	0.657119	0.92255	2594.34	2765.06
Asphd1	1.59803	0	2.20724	5.13243	1.11381	1.00148	0.921917	0.688874	NA	1.26842	2.41591
Aspm	36.7548	8.29294	29.7977	49.2714	57.9182	28.0415	0.812778	0.142052	NA	24.9485	45.077
Aspn	74.3085	116.101	131.331	85.1984	124.747	86.1274	-0.116166	0.713051	NA	107.247	98.6909
Asprv1	8.78918	2.36941	4.41447	7.18541	12.2519	7.01037	0.705116	0.522481	NA	5.19102	8.8159
Aspscr1	264.475	264.189	183.201	283.31	217.193	269.398	0.123281	0.524634	NA	237.288	256.634
Asrgl1	651.998	725.04	604.783	566.621	472.256	635.94	-0.253232	0.106438	NA	660.607	558.272
Aste1	111.862	118.471	144.574	149.867	149.251	128.19	0.198895	0.398441	NA	124.969	142.436
Astn1	12.7843	3.55412	4.41447	10.2649	11.1381	1.00148	-0.0551964	0.961249	NA	6.91762	7.46815
Astn2	49.539	50.9423	47.4556	48.2449	23.39	51.0755	-0.350691	0.422696	NA	49.3123	40.9035
Asun	413.891	419.386	534.151	466.025	460.004	484.717	0.05688	0.719983	NA	455.809	470.249
Asxl1	569.699	521.27	612.508	586.124	560.247	594.88	0.032441	0.817881	NA	567.826	580.417
Asxl2	895.698	864.835	1121.28	1072.68	1026.93	977.445	0.10483	0.478646	0.858636	960.603	1025.69
Asxl3	3.99508	1.18471	2.20724	10.2649	6.68287	0	1.00161	0.589048	NA	2.46234	5.64925
Atad1	1171.36	1290.14	1440.22	1255.39	1344.37	1161.72	-0.0489642	0.705173	0.93497	1300.57	1253.83
Atad2	353.165	335.272	397.303	447.548	424.362	366.542	0.192396	0.287634	NA	361.913	412.817
Atad2b	604.856	584.06	725.077	657.978	633.759	636.942	0.0183396	0.891392	NA	637.998	642.893
Atad3a	458.636	470.328	342.122	419.833	451.094	561.831	0.176714	0.315381	NA	423.695	477.586
Atad3aos	7.19115	9.47764	7.72533	15.3973	17.821	12.0178	0.883862	0.239384	NA	8.13137	15.0787
Atad5	75.1076	69.8976	81.6677	92.3838	98.0154	84.1244	0.276217	0.372087	NA	75.5576	91.5079
Atat1	71.9115	84.1141	79.4605	100.596	83.5358	85.1259	0.196032	0.503596	NA	78.4954	89.7525
Atcay	9.5882	4.73882	2.20724	22.5827	10.0243	3.00444	1.21232	0.253484	NA	5.51142	11.8705
Atcayos	2.39705	1.18471	2.20724	3.07946	2.22762	2.00296	0.302264	0.846042	NA	1.92966	2.43668
Ate1	843.762	875.497	1028.57	831.454	856.521	896.325	-0.0820197	0.513208	0.865036	915.944	861.434
Atf1	272.465	278.406	305.702	286.39	347.509	240.355	0.01807	0.919133	NA	285.524	291.418
Atf2	914.874	1024.77	1095.89	922.812	1068.14	961.422	-0.0370985	0.792894	0.95087	1011.85	984.126
Atf3	97.48	91.2223	103.74	104.702	77.9668	119.176	0.0205301	0.936943	NA	97.4808	100.615
Atf4	2508.91	2917.93	2603.44	2564.16	2500.51	2812.16	-0.0291619	0.824323	0.95808	2676.76	2625.61
Atf5	215.734	98.3306	115.88	198.112	154.82	250.37	0.461934	0.153163	NA	143.315	201.101
Atf6	3124.95	3483.03	3468.67	3172.87	2930.44	3533.22	-0.0685536	0.563064	0.891992	3358.89	3212.18
Atf6b	365.151	388.583	183.201	289.469	265.087	366.542	0.0304048	0.872332	NA	312.312	307.033
Atf7	396.312	377.921	536.358	537.879	395.403	392.581	0.0327727	0.852573	NA	436.864	441.954
Atf7ip	653.596	592.353	833.232	837.613	597.003	651.964	0.0137741	0.933933	NA	693.06	695.527
Atg10	202.151	200.215	314.531	241.224	284.022	219.324	0.0745322	0.76422	NA	238.966	248.19
Atg101	312.416	324.609	207.48	200.165	236.128	232.344	-0.312454	0.114354	NA	281.502	222.879
Atg12	402.704	438.341	440.344	378.774	540.198	325.481	-0.0704581	0.668309	NA	427.13	414.818
Atg13	552.121	579.321	612.508	561.488	449.98	531.786	-0.181607	0.254222	NA	581.317	514.418
Atg14	143.024	144.534	193.133	142.682	161.503	167.247	-0.0157518	0.945714	NA	160.23	157.144
Atg16l1	409.097	459.666	444.758	497.846	507.898	575.852	0.266895	0.0957928	NA	437.84	527.199
Atg16l2	80.7007	62.7894	57.3881	86.2249	119.178	67.0992	0.410839	0.180535	NA	66.9594	90.834
Atg2a	369.146	328.163	257.143	321.29	263.973	376.557	0.0013395	0.994005	NA	318.151	320.607
Atg2b	1090.66	1069.79	1227.22	1185.59	1062.58	1378.04	0.0907735	0.447258	0.848886	1129.22	1208.74
Atg3	777.443	899.192	802.33	832.481	780.782	821.214	-0.0258476	0.855624	0.964985	826.322	811.492
Atg4a	58.3282	60.42	34.2122	37.98	49.0077	45.0666	-0.176229	0.647628	NA	50.9868	44.0181
Atg4b	518.562	526.009	506.561	468.078	473.37	542.803	-0.0669521	0.645661	NA	517.044	494.75
Atg4c	186.97	194.292	259.35	208.377	186.006	180.267	-0.138694	0.489535	NA	213.537	191.55
Atg4d	392.317	456.112	297.977	355.165	340.826	394.583	-0.0561633	0.745944	NA	382.135	363.525
Atg5	632.821	664.62	695.279	585.098	757.392	581.86	-0.0560729	0.695239	NA	664.24	641.45
Atg7	405.9	458.481	403.924	410.595	353.078	406.601	-0.117695	0.455341	NA	422.769	390.091
Atg9a	376.337	361.335	289.148	362.35	295.16	407.603	0.043589	0.79865	NA	342.273	355.038
Atg9b	61.5243	85.2988	57.3881	62.6157	44.5524	57.0844	-0.308298	0.378263	NA	68.0704	54.7509
Athl1	366.749	299.731	333.293	358.244	273.998	390.578	0.0130787	0.950407	NA	333.257	340.94
Atic	417.886	388.583	331.085	376.721	350.851	380.563	-0.0349298	0.865371	NA	379.185	369.378
Atl1	48.74	61.6047	72.8388	47.2184	60.1458	58.0859	-0.130039	0.712556	NA	61.0612	55.15
Atl2	985.188	1251.05	1298.96	1150.69	1177.3	1112.65	-0.0336989	0.802883	0.95087	1178.4	1146.88
Atl3	1478.18	1651.48	1792.28	1495.59	1637.3	1457.15	-0.097532	0.398592	0.828411	1640.65	1530.02
Atm	1459	1407.43	1859.6	1777.88	1694.11	1690.5	0.139283	0.211519	0.706022	1575.34	1720.83
Atmin	499.385	510.608	533.048	490.661	353.078	511.757	-0.206237	0.172113	NA	514.347	451.832
Atn1	101.475	98.3306	73.9424	108.808	94.6739	94.1392	0.133113	0.632325	NA	91.2494	99.2069
Atoh8	1.59803	14.2165	4.41447	5.13243	8.91049	5.0074	-0.0559217	0.962037	NA	6.74299	6.35011
Atox1	316.411	421.755	236.174	279.204	419.907	281.416	0.0177831	0.926271	NA	324.78	326.842
Atp10a	97.48	55.6812	97.1184	86.2249	85.7635	74.1096	-0.0209939	0.947835	NA	83.4265	82.0327
Atp10b	177.382	137.426	171.061	151.92	136.999	205.304	0.00804283	0.979098	NA	161.956	164.741
Atp10d	116.656	85.2988	96.0148	148.841	187.12	115.17	0.573849	0.0299579	NA	99.3233	150.377
Atp11a	3457.35	3563.59	3519.44	3401.78	2406.95	3768.57	-0.165959	0.109524	0.586242	3513.46	3192.43
Atp11b	1143.39	1158.64	1478.85	1274.9	1483.6	1150.7	0.0536838	0.646295	0.918421	1260.29	1303.06
Atp11c	393.915	425.309	533.048	499.899	516.808	449.665	0.129206	0.44762	NA	450.757	488.791
Atp13a1	948.433	1059.13	782.465	993.639	785.237	1115.65	0.0459173	0.748195	0.946769	930.008	964.842
Atp13a2	646.404	649.219	374.127	568.674	379.81	550.815	-0.132742	0.40872	NA	556.583	499.766
Atp13a3	3457.35	3434.46	4136.36	3317.61	3101.96	3254.81	-0.1823	0.143793	0.624726	3676.06	3224.79
Atp13a4	306.023	215.616	338.811	225.827	245.038	330.489	-0.0914696	0.780451	NA	286.817	267.118
Atp13a5	1642.78	1844.59	1977.68	1545.89	1506.99	1744.58	-0.186894	0.122671	0.602236	1821.68	1599.15
Atp1a1	32276.3	37010.2	30391.4	30787.4	19632	35803.9	-0.252518	0.0511159	0.465205	33226	28741.1
Atp1a2	109.465	978.567	83.875	192.98	572.499	316.468	-0.0318984	0.980709	NA	390.636	360.649
Atp1a3	15.9803	8.29294	5.51809	7.18541	15.5934	5.0074	-0.155265	0.860844	NA	9.93045	9.26206
Atp1a4	13.5833	15.4012	29.7977	12.3178	12.2519	16.0237	-0.470941	0.454583	NA	19.594	13.5312
Atp1b1	11497.1	12017.7	12576.8	11610.6	9784.83	11123.4	-0.152565	0.135834	0.61878	12030.5	10839.6
Atp1b2	5.59312	1.18471	8.82895	6.15892	5.56906	5.0074	0.227142	0.850328	NA	5.20226	5.57846
Atp1b3	885.31	1029.51	904.967	820.163	1138.32	845.25	-0.0192295	0.905674	0.970039	939.929	934.576
Atp1b4	0.799017	0	1.10362	3.07946	2.22762	4.00592	2.32555	0.246107	NA	0.634212	3.10434
Atp2a1	23.9705	200.215	27.5905	50.2979	186.006	30.0444	-0.152188	0.788909	NA	83.9254	88.7829
Atp2a2	5636.26	6968.44	7324.71	5876.64	4538.78	6862.15	-0.222301	0.0888253	0.559297	6643.14	5759.19
Atp2a3	35359.7	35311.3	29185.2	27700.8	22452.2	35226.1	-0.247755	0.0878332	0.557396	33285.4	28459.7
Atp2b1	1744.25	1755.73	1897.12	1676.25	1456.87	1864.76	-0.117875	0.333897	0.782512	1799.04	1665.96
Atp2b2	27.9656	29.6176	14.347	25.6622	8.91049	19.0281	-0.421175	0.473352	NA	23.9768	17.8669
Atp2b3	4.7941	3.55412	4.41447	8.2119	3.34143	3.00444	0.182146	0.8668	NA	4.25423	4.85259
Atp2b4	215.734	220.355	171.061	192.98	155.934	170.252	-0.22045	0.294395	NA	202.384	173.055
Atp2c1	1564.47	1645.56	1787.86	1537.68	1433.47	1601.37	-0.127595	0.248252	0.73485	1665.96	1524.17
Atp2c2	26.3675	9.47764	11.0362	8.2119	16.7072	19.0281	-0.0573556	0.94075	NA	15.6271	14.6491
Atp4a	1346.34	1728.49	974.495	590.23	671.628	1531.26	-0.595823	0.00194665	0.0940979	1349.77	931.041
Atp5a1	13086.3	16572.8	12395.8	11048.1	11150.4	13034.3	-0.253907	0.0271011	0.340637	14018.3	11744.2
Atp5b	17865.2	23703.6	18313.4	17511.9	16418.7	19172.4	-0.174629	0.157245	0.64109	19960.7	17701
Atp5c1	3556.42	4459.23	3926.67	3636.84	4299.31	3350.96	-0.0886321	0.463065	0.853778	3980.78	3762.37
Atp5d	1133.01	1393.21	693.072	795.527	847.61	1015.5	-0.229771	0.0969516	0.572244	1073.1	886.213
Atp5e	896.497	1438.23	842.061	957.712	1398.95	825.22	-0.0195759	0.910997	0.972869	1058.93	1060.63
Atp5f1	3025.88	3652.45	3167.38	2974.76	3832.62	2840.2	-0.04064	0.745426	0.946482	3281.9	3215.86
Atp5g1	1034.73	1344.64	762.6	944.368	946.739	957.416	-0.113434	0.499235	0.858636	1047.32	949.508
Atp5g2	182.975	191.922	110.362	130.364	169.299	146.216	-0.085921	0.705649	NA	161.753	148.626
Atp5g3	1900.06	2324.39	2091.36	1695.76	2088.4	1894.8	-0.1542	0.264419	0.749135	2105.27	1892.98
Atp5h	1435.83	2024.66	1529.61	1431.95	1836.67	1353	-0.120768	0.421885	0.842187	1663.37	1540.54
Atp5j	1517.33	2072.05	1936.85	1732.71	2014.88	1449.14	-0.0996875	0.479617	0.858636	1842.08	1732.25
Atp5j2	1450.22	1910.93	1318.82	1240	1692.99	1299.92	-0.146649	0.322317	0.774659	1559.99	1410.97
Atp5k	960.418	1467.85	836.543	815.031	1310.96	792.171	-0.179519	0.302078	0.766353	1088.27	972.719
Atp5l	108.666	138.611	87.1858	110.861	181.551	116.172	0.281591	0.294416	NA	111.488	136.195
Atp5o	1987.15	2872.91	1879.46	1794.3	2477.12	1789.65	-0.159358	0.296624	0.760912	2246.51	2020.35
Atp5s	88.6908	110.178	102.636	107.781	89.1049	78.1155	-0.129854	0.66368	NA	100.502	91.6672
Atp5sl	334.788	335.272	294.666	363.376	396.517	371.549	0.231222	0.166597	NA	321.575	377.148
Atp6ap1	2419.42	2820.78	2563.71	2057.08	1910.19	2415.57	-0.296558	0.0176469	0.282891	2601.3	2127.61
Atp6ap2	1335.96	1502.21	1593.62	1332.38	1589.41	1402.07	-0.0334212	0.830385	0.960096	1477.26	1441.29
Atp6v0a1	673.571	691.868	704.108	671.322	555.792	714.056	-0.100798	0.472743	NA	689.849	647.057
Atp6v0a2	1466.2	1700.05	1447.95	1417.58	1395.61	1517.24	-0.0913662	0.483729	0.858636	1538.07	1443.48
Atp6v0b	1407.07	1819.71	1252.61	1493.54	1728.63	1433.12	0.0609376	0.645733	0.918421	1493.13	1551.76
Atp6v0d1	990.781	1028.32	952.423	924.865	913.325	1020.51	-0.0580039	0.636126	0.917743	990.509	952.9
Atp6v0d2	1648.37	1944.1	2249.17	1767.61	2122.92	1851.74	-0.0166617	0.911421	0.972869	1947.22	1914.09
Atp6v0e	715.919	800.861	696.383	573.806	825.334	581.86	-0.173831	0.253915	NA	737.721	660.334
[truncated: 14,920 more rows]
