# Supplementary material for: Cell-specific and shared enhancers control a high-density multi-gene locus active in mammary and salivary glands
Source: Research Square preprint supplement (doi:10.21203/rs.3.rs-2533579/v1), 2023-02-07
Supplement: Supplementary file 3 [file 59c4c28e324fcbf0d24780e3.xlsx]

## Sheet: p6 vs L1
Gene	WT_p6 rep1	WT_p6 rep2	WT_p6 rep3	WT_L1 rep1	WT_L1 rep2	WT_L1 rep3	WT_L1 rep4	log2FoldChange	p-value	padj	WT_p6_mean	WT_L1_mean
0610005C13Rik	20.3638	15.0822	6.14837	20.1114	6.05801	3.74171	10.0699	0.258064	0.589958	0.696047	13.8648	9.99526
0610007P14Rik	101.819	174.283	192.137	335.19	338.239	357.957	207.806	-0.93523	3.28286e-06	1.76511e-05	156.08	309.798
0610009B22Rik	76.3642	85.4658	86.0772	155.145	150.441	144.68	119.923	-0.751889	7.75132e-06	3.87217e-05	82.6358	142.547
0610009L18Rik	28.0002	31.8402	18.4451	7.6615	9.08702	12.4724	17.3935	1.02792	0.0037225	0.0101879	26.0952	11.6536
0610009O20Rik	435.276	417.274	461.128	430.959	456.37	500.142	447.653	-0.0691733	0.411609	0.53271	437.893	458.781
0610010F05Rik	458.185	496.037	422.701	620.581	586.618	653.552	530.043	-0.368536	0.000678677	0.00223341	458.974	597.699
0610010K14Rik	129.819	122.333	156.784	108.219	127.218	108.51	141.894	0.16476	0.332019	0.453436	136.312	121.46
0610011F06Rik	127.274	137.416	132.19	167.595	177.702	184.591	202.314	-0.477027	0.00272961	0.00774889	132.293	183.05
0610012G03Rik	73.8188	174.283	136.801	223.141	198.905	249.447	220.622	-0.741735	1.30383e-07	8.93752e-07	128.301	223.029
0610030E20Rik	644.005	420.626	461.128	615.793	571.473	482.681	553.845	-0.147179	0.265256	0.380831	508.586	555.948
0610037L13Rik	190.911	177.635	185.988	272.941	280.688	228.244	211.468	-0.427263	0.0020614	0.00604128	184.845	248.335
0610038B21Rik	7.63642	8.379	21.5193	10.5346	7.06768	8.73066	13.7317	0.263369	0.563439	0.673462	12.5116	10.0161
0610039H22Rik	33.0912	16.758	24.5935	11.4922	13.1257	8.73066	11.9008	0.868176	0.0577285	0.109326	24.8142	11.3123
0610039K10Rik	0	3.3516	3.07419	0.957687	0	1.24724	0	0.86291	0.126035	0.209215	2.14193	0.551231
0610040B10Rik	10.1819	11.7306	6.14837	19.1537	7.06768	14.9668	15.5626	-0.46057	0.242748	0.355092	9.35362	14.1877
0610040F04Rik	2.54547	0	4.61128	0	1.00967	0	2.74634	0.580908	0.308816	0.428605	2.38559	0.939002
0610040J01Rik	208.729	108.927	198.285	165.68	181.74	276.887	386.318	-0.565004	0.0548645	0.104885	171.98	252.656
0610043K17Rik	81.4552	28.4886	39.9644	28.7306	11.1064	22.4503	36.6178	0.848535	0.0154369	0.0354641	49.9694	24.7263
1010001N08Rik	7.63642	1.6758	7.68547	2.87306	3.02901	1.24724	0	1.0503	0.0586136	0.110646	5.6659	1.78733
1110001J03Rik	20.3638	68.7078	53.7983	117.796	115.102	96.0373	66.8276	-0.962835	0.000240997	0.000878899	47.6233	98.9406
1110002L01Rik	22.9093	31.8402	23.0564	28.7306	36.3481	23.6975	29.2943	-0.162222	0.599055	0.704439	25.9353	29.5176
1110004E09Rik	73.8188	113.954	112.208	134.076	123.18	142.185	129.993	-0.367896	0.0612255	0.114783	99.9937	132.359
1110004F10Rik	338.548	435.708	468.814	603.343	568.444	714.667	562.999	-0.54067	3.65557e-05	0.000159188	414.357	612.363
1110006O24Rik	0	1.6758	7.68547	3.83075	3.02901	8.73066	9.15446	-0.54579	0.285757	0.403446	3.12042	6.18622
1110007C09Rik	48.364	51.9498	92.2256	83.3188	89.8605	132.207	151.049	-0.806233	0.00127836	0.00394233	64.1798	114.109
1110008F13Rik	66.1823	93.8448	89.1514	278.687	248.379	359.204	212.383	-1.64734	1.44425e-21	4.89335e-20	83.0595	274.663
1110008L16Rik	290.184	219.53	253.62	198.241	212.03	190.827	325.899	0.119857	0.621136	0.723694	254.445	231.749
1110008P14Rik	91.6371	132.388	78.3918	685.704	724.942	901.753	665.529	-2.76518	1.82819e-34	1.6476e-32	100.806	744.482
1110012L19Rik	66.1823	98.8722	109.134	128.33	94.9089	124.724	126.332	-0.327222	0.133726	0.219606	91.3961	118.574
1110017D15Rik	0	5.0274	1.53709	3.83075	1.00967	0	2.74634	-0.0252498	0.962767	0.976015	2.18816	1.89669
1110019D14Rik	84.0007	41.895	56.8725	90.0226	71.6865	81.0704	52.1804	-0.304211	0.183944	0.285144	60.9227	73.74
1110020A21Rik	10.1819	8.379	7.68547	7.6615	4.03868	12.4724	11.9008	-0.0177791	0.966616	0.978466	8.74879	9.01834
1110028F11Rik	157.819	62.0046	170.617	98.6418	62.5995	49.8895	81.4747	0.662416	0.140281	0.228135	130.147	73.1514
1110032A03Rik	193.456	187.69	159.858	213.564	164.576	214.525	173.019	-0.0850855	0.581088	0.68861	180.334	191.421
1110032F04Rik	71.2733	20.1096	41.5015	4.78844	4.03868	2.49447	1.83089	2.86033	2.69827e-10	2.78518e-09	44.2948	3.28812
1110034G24Rik	50.9095	51.9498	66.095	32.5614	29.2804	32.4282	33.8715	0.802275	0.000309808	0.00110139	56.3181	32.0354
1110036E04Rik	2.54547	0	3.07419	0	0	0	0	0.378998	0.287697	NA	1.87322	0
1110037F02Rik	1036.01	1070.84	1014.48	1603.17	1403.44	1433.08	1335.64	-0.464326	1.08838e-09	1.02131e-08	1040.44	1443.83
1110038B12Rik	193.456	149.146	195.211	210.691	252.417	218.267	251.748	-0.386496	0.0120597	0.0286547	179.271	233.281
1110038F14Rik	134.91	147.47	113.745	108.219	129.238	123.477	119.008	0.118491	0.43189	0.552713	132.042	119.985
1110046J04Rik	2.54547	11.7306	6.14837	7.6615	0	3.74171	3.66178	0.669754	0.191541	0.294302	6.80815	3.76625
1110051M20Rik	94.1826	118.982	115.282	70.8688	64.6188	57.3729	64.0812	0.761819	0.000227216	0.000833987	109.482	64.2354
1110058D11Rik	38.1821	13.4064	27.6677	19.1537	9.08702	16.2141	21.0553	0.522631	0.212041	0.319384	26.4187	16.3775
1110059E24Rik	173.092	201.096	207.508	232.718	238.282	258.178	205.975	-0.243519	0.153603	0.245657	193.899	233.788
1110059G10Rik	86.5461	95.5206	104.522	119.711	93.8992	88.5539	119.923	-0.119141	0.503466	0.619312	95.5297	105.522
1110065P20Rik	10.1819	8.379	10.7597	5.74612	10.0967	9.9779	11.9008	-0.0388828	0.9358	0.957286	9.77352	9.43038
1190002F15Rik	28.0002	25.137	47.6499	20.1114	24.2321	104.768	17.3935	-0.213582	0.593115	0.698889	33.5957	41.6262
1190002N15Rik	165.456	311.699	250.546	268.152	338.239	288.112	214.214	-0.162944	0.452213	0.572437	242.567	277.179
1190007I07Rik	48.364	35.1918	55.3354	41.1805	59.5705	43.6533	43.026	-0.0261942	0.913418	0.94106	46.2971	46.8576
1200014J11Rik	493.822	542.959	458.054	454.901	445.264	441.522	451.315	0.15422	0.172441	0.270179	498.278	448.251
1300002E11Rik	343.639	197.744	184.451	154.188	120.151	127.218	213.299	0.606818	0.0018154	0.00538883	241.945	153.714
1300017J02Rik	7.63642	0	1.53709	33.519	22.2127	12.4724	26.5479	-2.41628	1.42892e-06	8.17563e-06	3.05784	23.688
1500004A13Rik	61.0914	65.3562	64.5579	41.1805	41.3964	31.1809	45.7723	0.630085	0.0296967	0.0624834	63.6685	39.8825
1500009L16Rik	0	6.7032	6.14837	4.78844	5.04834	2.49447	3.66178	0.311246	0.527656	0.64136	4.28386	3.99826
1500011B03Rik	56.0004	40.2192	38.4273	30.646	28.2707	31.1809	32.0406	0.503817	0.0462681	0.091039	44.8823	30.5346
1500011K16Rik	76.3642	120.658	118.356	55.5459	64.6188	49.8895	54.0113	0.88648	0.000121472	0.000473148	105.126	56.0164
1500012F01Rik	310.548	288.238	356.606	262.406	317.036	168.377	340.546	0.224702	0.270006	0.386152	318.464	272.091
1500012K07Rik	0	0	0	0	0	0	0	0	1	NA	0	0
1500015A07Rik	58.5459	41.895	61.4837	25.8576	25.2417	18.7086	50.3495	0.772345	0.00528976	0.0139112	53.9749	30.0393
1500015L24Rik	5.09095	3.3516	10.7597	0.957687	0	0	0	2.09124	0.000281939	0.00101388	6.40073	0.239422
1500015O10Rik	68.7278	23.4612	193.674	22.9845	45.4351	43.6533	40.2796	1.15175	0.00528156	0.0138917	95.2876	38.0881
1500017E21Rik	2.54547	8.379	6.14837	0	0	0	1.83089	1.83802	0.000994951	0.00315097	5.69095	0.457723
1500026H17Rik	10.1819	18.4338	7.68547	22.9845	14.1354	12.4724	27.4634	-0.557198	0.147445	0.237761	12.1004	19.2639
1600002D24Rik	7.63642	5.0274	6.14837	15.323	5.04834	3.74171	7.32357	-0.242458	0.654037	0.750891	6.27073	7.85915
1600002H07Rik	106.91	98.8722	124.505	98.6418	108.035	178.355	97.9527	-0.114956	0.53974	0.652362	110.096	120.746
1600002K03Rik	43.2731	50.274	61.4837	130.245	127.218	119.735	80.5592	-1.10093	2.14328e-07	1.41141e-06	51.6769	114.439
1600010M07Rik	2.54547	0	1.53709	4.78844	2.01934	4.98895	5.49268	-0.857815	0.120923	0.202324	1.36086	4.32235
1600012H06Rik	213.82	308.347	252.083	442.451	413.964	396.621	445.822	-0.691328	5.61379e-09	4.74832e-08	258.083	424.715
1600014C10Rik	554.913	571.448	405.793	552.585	424.061	369.182	480.609	0.148306	0.337291	0.458449	510.718	456.609
1600015I10Rik	0	1.6758	0	0.957687	2.01934	0	0	-0.0604759	0.871622	NA	0.5586	0.744256
1600020E01Rik	134.91	60.3288	64.5579	58.4189	41.3964	49.8895	57.6731	0.64722	0.00184993	0.00548033	86.599	51.8445
1600023N17Rik	2.54547	3.3516	13.8338	8.61918	4.03868	1.24724	4.57723	0.391355	0.452835	0.572916	6.57697	4.62058
1600029I14Rik	2.54547	1.6758	4.61128	5.74612	4.03868	2.49447	2.74634	-0.411936	0.467286	0.585628	2.94419	3.7564
1600029O15Rik	0	1.6758	3.07419	0	4.03868	0	2.74634	0.0840401	0.883216	0.92044	1.58333	1.69625
1700001C19Rik	5.09095	1.6758	1.53709	4.78844	4.03868	3.74171	0	-0.22663	0.691184	0.78151	2.76795	3.14221
1700001D01Rik	73.8188	28.4886	26.1306	8.61918	14.1354	16.2141	11.9008	1.28903	0.0101003	0.024561	42.8126	12.7174
1700001G11Rik	2.54547	3.3516	0	2.87306	4.03868	0	0.915446	-0.0312167	0.956406	0.971732	1.96569	1.9568
1700001G17Rik	0	0	1.53709	1.91537	2.01934	1.24724	2.74634	-0.563026	0.316406	0.436613	0.512365	1.98207
1700001J03Rik	7.63642	5.0274	4.61128	0.957687	2.01934	2.49447	2.74634	0.931601	0.0929286	0.162949	5.75837	2.05446
1700001K19Rik	33.0912	13.4064	10.7597	8.61918	5.04834	8.73066	11.9008	0.884201	0.0382519	0.077446	19.0857	8.57475
1700001K23Rik	2.54547	6.7032	13.8338	8.61918	8.07735	6.23619	2.74634	0.227528	0.659586	0.755405	7.69417	6.41976
1700001L05Rik	150.183	88.8174	189.063	225.056	190.827	195.816	213.299	-0.549188	0.00874388	0.021606	142.688	206.25
1700001L19Rik	2.54547	1.6758	1.53709	2.87306	0	1.24724	0	0.351452	0.531968	0.645121	1.91946	1.03007
1700001O22Rik	30.5457	16.758	43.0386	77.5727	86.8315	123.477	36.6178	-1.35762	8.67414e-05	0.00034897	30.1141	81.1246
1700001P01Rik	7.63642	1.6758	3.07419	5.74612	2.01934	6.23619	2.74634	-0.161351	0.768163	0.840656	4.1288	4.187
1700003D09Rik	0	0	0	0	1.00967	0	0	0.0374789	0.922899	NA	0	0.252417
1700003E16Rik	30.5457	8.379	26.1306	32.5614	33.3191	36.1699	28.3788	-0.630153	0.100037	0.172954	21.6851	32.6073
1700003F12Rik	2.54547	3.3516	0	2.87306	1.00967	2.49447	2.74634	-0.294711	0.601979	0.70666	1.96569	2.28089
1700003G13Rik	12.7274	1.6758	9.22256	30.646	21.203	18.7086	18.3089	-1.2817	0.00804579	0.0200992	7.87524	22.2166
1700003G18Rik	0	1.6758	4.61128	0.957687	0	0	0.915446	0.756053	0.158665	0.252324	2.09569	0.468283
1700003M02Rik	0	0	1.53709	0.957687	0	1.24724	1.83089	-0.212065	0.6819	0.773465	0.512365	1.00895
1700003M07Rik	0	0	0	0	1.00967	0	0.915446	-0.067984	0.856305	NA	0	0.481279
1700006F04Rik	0	0	0	0	0	0	0	0	1	NA	0	0
1700006H21Rik	0	0	0	0	0	0	0	0	1	NA	0	0
1700007B14Rik	0	0	0	0.957687	1.00967	0	0.915446	-0.219812	0.664607	0.75974	0	0.7207
1700007F19Rik	0	1.6758	0	0	0	0	0	0.233766	0.537257	NA	0.5586	0
1700007G11Rik	0	0	0	0	0	0	0	0	1	NA	0	0
1700007J10Rik	45.8185	28.4886	41.5015	27.7729	31.2997	17.4613	40.2796	0.34346	0.38281	0.50396	38.6029	29.2034
1700007K09Rik	2.54547	0	0	0	0	0	0	0.29321	0.481224	NA	0.848491	0
1700007K13Rik	0	3.3516	0	2.87306	0	4.98895	3.66178	-0.631299	0.261814	0.376956	1.1172	2.88095
1700007L15Rik	10.1819	6.7032	15.3709	7.6615	16.1547	7.48342	14.6471	-0.0515296	0.902645	0.934435	10.752	11.4867
1700007P06Rik	0	1.6758	0	0	0	0	0	0.224859	0.548888	NA	0.5586	0
1700008J07Rik	35.6366	23.4612	35.3532	20.1114	11.1064	12.4724	22.8861	0.840888	0.00480438	0.0127514	31.4837	16.6441
1700008O03Rik	5.09095	0	3.07419	0.957687	1.00967	1.24724	0.915446	0.54927	0.332794	0.454214	2.72171	1.03251
1700009J07Rik	0	1.6758	3.07419	0.957687	0	0	0.915446	0.703681	0.213295	0.320565	1.58333	0.468283
1700010I14Rik	28.0002	21.7854	19.9822	23.9422	15.145	14.9668	20.1398	0.240601	0.493536	0.61026	23.2559	18.5485
1700011B04Rik	0	0	0	0	0	0	1.83089	-0.0460025	0.901105	NA	0	0.457723
1700011E24Rik	0	1.6758	3.07419	0	2.01934	1.24724	0	0.389302	0.470322	0.588532	1.58333	0.816644
1700011H14Rik	0	1.6758	0	4.78844	3.02901	1.24724	1.83089	-0.88723	0.112372	0.190205	0.5586	2.72389
1700011I03Rik	0	0	0	0.957687	1.00967	2.49447	1.83089	-0.70183	0.164014	NA	0	1.57318
1700011L22Rik	0	1.6758	0	0.957687	1.00967	2.49447	1.83089	-0.432888	0.439984	0.560927	0.5586	1.57318
1700012B07Rik	40.7276	1.6758	59.9467	244.21	195.876	281.876	221.538	-2.58279	1.54006e-10	1.62945e-09	34.1167	235.875
1700012D01Rik	15.2728	1.6758	12.2967	8.61918	4.03868	4.98895	13.7317	0.167228	0.706635	0.793875	9.74847	7.84462
1700012D14Rik	35.6366	15.0822	21.5193	1.91537	9.08702	7.48342	12.8162	1.283	0.00602198	0.0155716	24.0794	7.82552
1700012D16Rik	5.09095	6.7032	4.61128	15.323	20.1934	8.73066	15.5626	-1.31272	0.00589185	0.0152729	5.46848	14.9524
1700013F07Rik	0	0	0	1.91537	2.01934	0	0.915446	-0.445463	0.318235	NA	0	1.21254
1700015E13Rik	50.9095	11.7306	44.5757	22.9845	14.1354	6.23619	35.7024	0.607079	0.22428	0.333658	35.7386	19.7646
1700016C15Rik	5.09095	6.7032	16.908	6.70381	2.01934	2.49447	8.23901	0.752913	0.139015	0.226429	9.56739	4.86416
1700016D06Rik	0	0	1.53709	0	0	0	0	0.240818	0.532857	NA	0.512365	0
1700016H13Rik	0	1.6758	0	0	0	0	0	0.597832	0.256317	0.370725	0.5586	0
1700016K19Rik	0	0	0	0	2.01934	1.24724	0	-0.213856	0.63704	NA	0	0.816644
1700017B05Rik	313.093	444.087	350.457	588.02	642.149	688.475	563.915	-0.734811	5.42272e-05	0.00022787	369.213	620.64
1700018G05Rik	0	1.6758	0	0	0	0	0	0.164255	0.618372	NA	0.5586	0
1700018L02Rik	0	1.6758	0	0.957687	3.02901	2.49447	0	-0.314642	0.577114	0.685495	0.5586	1.62029
1700019A02Rik	0	0	3.07419	1.91537	1.00967	0	0	0.191991	0.715107	0.800757	1.02473	0.731261
1700019B03Rik	2.54547	1.6758	4.61128	0.957687	0	0	0.915446	0.894889	0.0791301	0.142208	2.94419	0.468283
1700019D03Rik	17.8183	15.0822	12.2967	95.7687	89.8605	147.174	32.0406	-2.24349	3.23996e-09	2.8263e-08	15.0658	91.211
1700019E08Rik	0	3.3516	1.53709	0	0	0	0.915446	0.346527	0.357942	NA	1.62956	0.228861
1700019G17Rik	140.001	102.224	93.7627	45.0113	55.5318	89.8011	80.5592	0.680982	0.00536916	0.0141012	111.996	67.7259
1700019L03Rik	22.9093	20.1096	16.908	10.5346	9.08702	9.9779	16.478	0.629221	0.105992	0.181446	19.9756	11.5194
1700019N19Rik	5.09095	3.3516	3.07419	0	2.01934	0	0	0.916762	0.063074	0.117615	3.83891	0.504834
1700020A23Rik	2.54547	1.6758	3.07419	0.957687	0	0	0.915446	0.82251	0.136771	0.223512	2.43182	0.468283
1700020D05Rik	28.0002	11.7306	15.3709	4.78844	5.04834	2.49447	4.57723	1.61306	0.000831046	0.00267872	18.3673	4.22712
1700020I14Rik	593.096	658.589	587.17	750.827	680.517	725.892	656.375	-0.187993	0.113947	0.192283	612.952	703.403
1700020L24Rik	25.4547	50.274	32.279	26.8152	18.174	29.9337	23.8016	0.520249	0.0751759	0.13608	36.0026	24.6811
1700020N01Rik	0	0	1.53709	0.957687	0	0	0	0.0943895	0.774921	NA	0.512365	0.239422
1700020N18Rik	0	0	1.53709	0	0	0	0	0.132052	0.656534	NA	0.512365	0
1700021F05Rik	86.5461	134.064	122.967	181.003	201.934	204.547	162.949	-0.666259	4.25128e-05	0.000182709	114.526	187.608
1700021K19Rik	649.096	491.009	539.52	420.425	448.293	440.275	533.705	0.269171	0.0133056	0.0311809	559.875	460.674
1700021N21Rik	0	0	1.53709	0	0	0	0	0.0817506	0.732221	NA	0.512365	0
1700022H01Rik	0	5.0274	1.53709	1.91537	2.01934	0	3.66178	0.0680669	0.905199	0.935892	2.18816	1.89912
1700022H16Rik	2.54547	0	0	0	1.00967	0	0	0.329556	0.525305	NA	0.848491	0.252417
1700022I11Rik	10.1819	5.0274	9.22256	16.2807	7.06768	4.98895	10.0699	-0.284145	0.554444	0.665163	8.14395	9.6018
1700023F06Rik	0	0	0	0.957687	1.00967	0	1.83089	-0.406684	0.424009	NA	0	0.949562
1700024B18Rik	2.54547	3.3516	0	0	0	0	0	0.375013	0.28692	NA	1.96569	0
1700024F13Rik	12.7274	10.0548	9.22256	0.957687	2.01934	0	0.915446	2.24136	5.53588e-05	0.000232076	10.6682	0.973118
1700024I08Rik	0	3.3516	0	0	0	0	0.915446	0.499235	0.313142	NA	1.1172	0.228861
1700024P16Rik	101.819	93.8448	72.2434	159.934	99.9572	86.0594	169.357	-0.515689	0.0600351	0.112969	89.3024	128.827
1700025F24Rik	0	1.6758	0	1.91537	0	0	0	0.0327253	0.928331	NA	0.5586	0.478844
1700025G04Rik	1081.83	792.653	929.942	1205.73	1074.29	1207.33	1835.47	-0.520093	0.000356642	0.00124913	934.807	1330.7
1700025M24Rik	0	0	0	0	0	1.24724	0	0.00937415	0.969336	NA	0	0.311809
1700025N23Rik	5.09095	3.3516	6.14837	4.78844	6.05801	1.24724	4.57723	0.10915	0.834531	0.888478	4.86364	4.16773
1700026D08Rik	0	1.6758	3.07419	4.78844	2.01934	3.74171	0.915446	-0.227992	0.678921	0.771428	1.58333	2.86623
1700026J14Rik	0	0	0	0	0	1.24724	1.83089	-0.157506	0.674241	NA	0	0.769532
1700026L06Rik	0	5.0274	1.53709	0.957687	1.00967	1.24724	2.74634	0.377375	0.510015	0.625535	2.18816	1.49023
1700027A15Rik	0	0	0	0	0	0	2.74634	-0.0718632	0.77798	NA	0	0.686584
1700027J07Rik	0	0	0	2.87306	6.05801	8.73066	0.915446	-1.41385	0.0109558	0.0263698	0	4.6443
1700028E10Rik	25.4547	3.3516	30.7419	89.0649	49.4738	51.1367	32.0406	-1.35196	0.00106151	0.00333618	19.8494	55.429
1700028I16Rik	0	1.6758	0	0	0	1.24724	0.915446	0.0694883	0.882171	NA	0.5586	0.540671
1700028J19Rik	5.09095	3.3516	1.53709	4.78844	4.03868	1.24724	3.66178	-0.137334	0.804329	0.866403	3.32655	3.43403
1700028K03Rik	12.7274	16.758	21.5193	10.5346	9.08702	12.4724	10.0699	0.61162	0.156057	0.248912	17.0016	10.541
1700029F12Rik	0	5.0274	0	0	0	0	0	0.0994754	0.636006	0.736105	1.6758	0
1700029H14Rik	10.1819	1.6758	3.07419	1.91537	1.00967	0	3.66178	0.718739	0.212098	0.319406	4.97729	1.64671
1700029I15Rik	12.7274	16.758	21.5193	23.9422	9.08702	14.9668	17.3935	0.0398465	0.917176	0.943755	17.0016	16.3474
1700029J07Rik	109.455	41.895	56.8725	19.1537	20.1934	18.7086	23.8016	1.60299	1.89402e-08	1.47614e-07	69.4076	20.4643
1700030A11Rik	0	0	0	0	1.00967	0	4.57723	-0.468656	0.293451	NA	0	1.39672
1700030C10Rik	48.364	18.4338	18.4451	32.5614	9.08702	22.4503	18.3089	0.310932	0.501426	0.617316	28.4143	20.6019
1700030F18Rik	2.54547	0	0	0	0	0	0	0.181754	0.593021	NA	0.848491	0
1700030J22Rik	2.54547	16.758	16.908	11.4922	14.1354	6.23619	14.6471	0.112692	0.782267	0.850221	12.0705	11.6277
1700030K09Rik	180.729	117.306	142.95	85.2341	59.5705	86.0594	90.6291	0.827966	9.32915e-06	4.583e-05	146.995	80.3733
1700031M16Rik	0	0	0	0	1.00967	1.24724	0.915446	-0.167461	0.650799	NA	0	0.793088
1700034H15Rik	17.8183	3.3516	15.3709	4.78844	3.02901	4.98895	10.9854	0.696314	0.185893	0.287536	12.1803	5.94794
1700034I23Rik	17.8183	3.3516	10.7597	9.57687	4.03868	0	8.23901	0.588648	0.282453	0.400021	10.6432	5.46364
1700034J05Rik	33.0912	25.137	30.7419	27.7729	24.2321	34.9226	41.1951	-0.120143	0.776261	0.845782	29.6567	32.0307
1700034P13Rik	0	0	1.53709	0.957687	1.00967	3.74171	1.83089	-0.495232	0.378075	0.499331	0.512365	1.88499
1700037C18Rik	38.1821	15.0822	30.7419	18.1961	22.2127	18.7086	30.2097	0.254533	0.481988	0.599539	28.0021	22.3318
1700037H04Rik	193.456	407.219	216.73	103.43	111.064	111.004	154.71	1.11777	2.52215e-07	1.64083e-06	272.469	120.052
1700040L02Rik	5.09095	8.379	13.8338	13.4076	11.1064	16.2141	12.8162	-0.366121	0.391955	0.513032	9.10126	13.3861
1700041A01Rik	0	0	0	0.957687	0	2.49447	0	-0.120961	0.710056	NA	0	0.86304
1700042G15Rik	0	0	0	17.2384	16.1547	17.4613	2.74634	-2.59493	2.37355e-06	1.31073e-05	0	13.4002
1700042O10Rik	0	0	0	0	1.00967	1.24724	0	-0.0797642	0.839068	NA	0	0.564227
1700047A11Rik	17.8183	5.0274	12.2967	11.4922	5.04834	4.98895	10.9854	0.351752	0.429815	0.550454	11.7142	8.12872
1700047G03Rik	0	5.0274	7.68547	1.91537	7.06768	1.24724	2.74634	0.404475	0.450175	0.570673	4.23762	3.24416
1700047M11Rik	0	1.6758	1.53709	0	2.01934	2.49447	0	-0.00193961	0.997095	0.999131	1.07096	1.12845
1700048M11Rik	2.54547	10.0548	4.61128	2.87306	6.05801	4.98895	10.0699	-0.0168136	0.974671	0.983612	5.73719	5.99748
1700048O20Rik	5.09095	5.0274	16.908	17.2384	17.1644	33.6754	8.23901	-0.752754	0.122617	0.204581	9.00879	19.0793
1700049G17Rik	252.002	182.662	185.988	114.922	116.112	114.746	134.571	0.761683	3.76359e-08	2.79343e-07	206.884	120.088
1700052I22Rik	0	0	0	3.83075	1.00967	0	0	-0.385864	0.379616	NA	0	1.2101
1700052K11Rik	43.2731	55.3014	46.1128	47.8844	42.4061	31.1809	54.9268	0.133939	0.594877	0.700618	48.2291	44.0995
1700054M17Rik	0	0	0	0.957687	2.01934	0	0	-0.200696	0.622259	NA	0	0.744256
1700056E22Rik	5.09095	6.7032	3.07419	0.957687	2.01934	0	0.915446	1.33636	0.0153668	0.0353304	4.95611	0.973118
1700061G19Rik	12.7274	10.0548	15.3709	11.4922	3.02901	7.48342	10.0699	0.490846	0.305509	0.425022	12.7177	8.01865
1700061I17Rik	0	0	1.53709	0.957687	0	0	0	0.0344175	0.868958	NA	0.512365	0.239422
1700063O14Rik	2.54547	1.6758	1.53709	0	0	0	0	0.247046	0.402604	NA	1.91946	0
1700065J18Rik	0	1.6758	3.07419	1.91537	2.01934	1.24724	1.83089	-0.0338535	0.952591	0.968676	1.58333	1.75321
1700066B19Rik	5.09095	8.379	12.2967	10.5346	10.0967	26.192	10.0699	-0.522503	0.289713	0.407702	8.5889	14.2233
1700066M21Rik	81.4552	85.4658	109.134	150.357	120.151	193.322	128.162	-0.632752	0.00074119	0.00241895	92.0182	147.998
1700067G17Rik	5.09095	0	1.53709	1.91537	3.02901	1.24724	0.915446	-0.0644918	0.909029	0.938527	2.20935	1.77677
1700067K01Rik	7.63642	1.6758	12.2967	9.57687	6.05801	8.73066	15.5626	-0.412119	0.372784	0.494428	7.20299	9.98203
1700069L16Rik	0	0	0	0.957687	2.01934	2.49447	0	-0.51369	0.271375	NA	0	1.36787
1700071M16Rik	20.3638	23.4612	23.0564	15.323	12.116	7.48342	17.3935	0.696782	0.0543208	0.104073	22.2938	13.079
1700073E17Rik	5.09095	0	0	0	0	1.24724	0	0.556811	0.284688	0.402448	1.69698	0.311809
1700074H08Rik	0	0	4.61128	0.957687	0	1.24724	1.83089	0.240567	0.658291	0.754311	1.53709	1.00895
1700084C01Rik	0	0	0	0.957687	0	0	0.915446	-0.0568948	0.914992	0.942491	0	0.468283
1700084E18Rik	2.54547	1.6758	6.14837	5.74612	3.02901	6.23619	5.49268	-0.396735	0.460538	0.580009	3.45655	5.126
1700084J12Rik	5.09095	6.7032	6.14837	0.957687	4.03868	3.74171	4.57723	0.545069	0.326439	0.447432	5.98084	3.32883
1700085C21Rik	0	0	1.53709	0.957687	1.00967	0	0	0.100404	0.841053	NA	0.512365	0.491839
1700086O06Rik	56.0004	46.9224	32.279	56.5035	60.5801	66.1036	60.4194	-0.452955	0.0706914	0.129507	45.0673	60.9017
1700088E04Rik	5.09095	8.379	6.14837	1.91537	3.02901	1.24724	1.83089	1.12876	0.0402115	0.0808602	6.53944	2.00563
1700092M07Rik	10.1819	3.3516	7.68547	4.78844	5.04834	4.98895	8.23901	0.0941246	0.854776	0.902402	7.07299	5.76619
1700093K21Rik	5.09095	1.6758	3.07419	0.957687	2.01934	2.49447	2.74634	0.265194	0.642654	0.741852	3.28031	2.05446
1700094D03Rik	122.183	63.6804	72.2434	91.938	77.7445	64.8563	83.3056	0.062497	0.783036	0.850901	86.0355	79.4611
1700094J05Rik	2.54547	3.3516	0	4.78844	1.00967	1.24724	1.83089	-0.203826	0.720225	0.804611	1.96569	2.21906
1700095J12Rik	25.4547	8.379	26.1306	20.1114	13.1257	12.4724	18.3089	0.18392	0.695013	0.78489	19.9881	16.0046
1700096J18Rik	0	0	0	0	2.01934	1.24724	0	-0.195421	0.628729	NA	0	0.816644
1700096K18Rik	5.09095	31.8402	10.7597	35.4344	17.1644	19.9558	24.717	-0.452482	0.179206	0.279016	15.8969	24.3179
1700097N02Rik	0	0	0	0.957687	0	1.24724	0	-0.0267514	0.914652	NA	0	0.551231
1700099I09Rik	17.8183	5.0274	29.2048	16.2807	12.116	4.98895	22.8861	0.150542	0.762337	0.836399	17.3502	14.068
1700100L14Rik	0	0	1.53709	0.957687	2.01934	0	1.83089	-0.338118	0.535408	0.648317	0.512365	1.20198
1700101E01Rik	0	1.6758	3.07419	0.957687	0	2.49447	0	0.494555	0.383566	0.504739	1.58333	0.86304
1700101I11Rik	2.54547	0	0	0	0	1.24724	0	0.331892	0.525449	0.639442	0.848491	0.311809
1700102H20Rik	2.54547	0	9.22256	5.74612	7.06768	9.9779	2.74634	-0.447795	0.388538	0.509536	3.92268	6.38451
1700102P08Rik	2.54547	13.4064	7.68547	12.4499	8.07735	4.98895	10.0699	-0.128509	0.790432	0.856043	7.87911	8.89653
1700104L18Rik	0	0	0	0	0	0	0.915446	0.046192	0.911633	NA	0	0.228861
1700105P06Rik	17.8183	5.0274	1.53709	2.87306	2.01934	1.24724	3.66178	0.909125	0.113494	0.191765	8.1276	2.45035
1700108F19Rik	0	0	1.53709	0	0	1.24724	1.83089	0.0721806	0.896555	0.929594	0.512365	0.769532
1700108J01Rik	5.09095	5.0274	6.14837	8.61918	7.06768	3.74171	2.74634	-0.156009	0.783963	0.851491	5.42224	5.54373
1700109G15Rik	0	0	1.53709	5.74612	0	2.49447	0	-0.597295	0.245861	0.358494	0.512365	2.06015
1700109H08Rik	86.5461	58.653	66.095	53.6305	33.3191	41.1588	35.7024	0.688695	0.036405	0.0742998	70.4314	40.9527
1700109K24Rik	106.91	55.3014	64.5579	68.9535	68.6575	58.6202	71.4048	0.113103	0.732668	0.814197	75.5898	66.909
1700110C19Rik	5.09095	8.379	4.61128	4.78844	5.04834	0	3.66178	0.548166	0.295797	0.414195	6.02708	3.37464
1700110K17Rik	10.1819	3.3516	3.07419	8.61918	7.06768	6.23619	2.74634	-0.252258	0.624394	0.726774	5.53589	6.16735
1700112E06Rik	25.4547	23.4612	19.9822	9.57687	4.03868	7.48342	8.23901	1.38478	0.00067709	0.00222901	22.9661	7.3345
1700112H15Rik	0	0	0	0	0	0	0	0	1	NA	0	0
1700112J05Rik	0	0	0	0.957687	0	1.24724	1.83089	-0.301652	0.457624	NA	0	1.00895
1700112J16Rik	0	6.7032	9.22256	7.6615	4.03868	9.9779	10.0699	-0.325416	0.486479	0.603729	5.30859	7.93699
1700113A16Rik	84.0007	68.7078	78.3918	52.6728	52.5028	52.384	60.4194	0.464994	0.0383528	0.0776326	77.0334	54.4947
1700113H08Rik	2.54547	0	1.53709	0	0	1.24724	0	0.283816	0.484676	NA	1.36086	0.311809
1700119H24Rik	17.8183	3.3516	6.14837	6.70381	9.08702	6.23619	6.40812	0.120401	0.814469	0.873133	9.1061	7.10878
1700120C14Rik	0	0	7.68547	0	3.02901	0	2.74634	0.417862	0.463686	0.582783	2.56182	1.44384
1700120E14Rik	25.4547	11.7306	21.5193	18.1961	12.116	11.2251	21.0553	0.137198	0.7977	0.861772	19.5682	15.6481
1700120G07Rik	2.54547	3.3516	1.53709	0.957687	0	1.24724	0.915446	0.66334	0.233279	0.343962	2.47806	0.780093
1700120K04Rik	10.1819	8.379	3.07419	9.57687	8.07735	7.48342	9.15446	-0.296006	0.539308	0.651929	7.21169	8.57303
1700123I01Rik	2.54547	1.6758	4.61128	1.91537	0	0	1.83089	0.72576	0.201905	0.306824	2.94419	0.936566
1700123L14Rik	0	0	0	0	0	1.24724	0	0.0625075	0.894976	NA	0	0.311809
1700123M08Rik	22.9093	23.4612	10.7597	5.74612	3.02901	8.73066	4.57723	1.50293	0.000377192	0.00131359	19.0434	5.52076
1700123O20Rik	160.365	142.443	182.914	288.264	257.466	298.09	261.818	-0.759166	3.02975e-07	1.94539e-06	161.907	276.409
1700124L16Rik	0	1.6758	1.53709	0	3.02901	1.24724	0	0.116523	0.834897	0.888708	1.07096	1.06906
1700125G22Rik	2.54547	0	1.53709	0	0	0	0	0.331057	0.382127	NA	1.36086	0
1700125H03Rik	7.63642	1.6758	3.07419	4.78844	4.03868	1.24724	2.74634	0.106397	0.846558	0.896337	4.1288	3.20517
1700125H20Rik	0	0	0	0.957687	0	0	0.915446	-0.0483649	0.884559	NA	0	0.468283
1700126H18Rik	5.09095	0	3.07419	3.83075	0	0	0.915446	0.342226	0.51975	0.634202	2.72171	1.18655
1700128A07Rik	0	1.6758	0	0	0	0	0.915446	0.0589066	0.827678	NA	0.5586	0.228861
1810006J02Rik	7.63642	3.3516	1.53709	0.957687	1.00967	3.74171	5.49268	0.22217	0.696145	0.785779	4.17504	2.80044
1810008I18Rik	2.54547	1.6758	0	0	0	1.24724	0	0.359887	0.42166	NA	1.40709	0.311809
1810009A15Rik	0	1.6758	0	0.957687	1.00967	0	2.74634	-0.193998	0.724423	0.807827	0.5586	1.17842
1810010D01Rik	12.7274	11.7306	10.7597	3.83075	2.01934	7.48342	5.49268	0.949723	0.0691326	0.127019	11.7392	4.70655
1810010H24Rik	12.7274	23.4612	10.7597	1.91537	10.0967	3.74171	10.0699	1.08487	0.00913919	0.0224733	15.6494	6.45592
1810011H11Rik	81.4552	26.8128	49.187	44.0536	27.2611	21.203	54.9268	0.420445	0.171527	0.268947	52.485	36.8611
1810011O10Rik	817.097	625.073	765.473	549.712	405.887	314.304	501.664	0.723745	4.27864e-05	0.000183707	735.881	442.892
1810012K16Rik	2.54547	0	1.53709	11.4922	6.05801	3.74171	7.32357	-1.34483	0.0112932	0.0270762	1.36086	7.15388
1810013A23Rik	33.0912	15.0822	13.8338	11.4922	7.06768	6.23619	18.3089	0.635024	0.192416	0.295387	20.6691	10.7763
1810013L24Rik	692.369	712.215	644.042	828.399	724.942	687.228	839.464	-0.1698	0.0827899	0.147587	682.875	770.008
1810014B01Rik	43.2731	43.5708	41.5015	25.8576	25.2417	27.4392	21.9707	0.742854	0.00564584	0.0147211	42.7818	25.1273
1810019D21Rik	112.001	70.3836	70.7063	155.145	150.441	159.646	183.089	-0.91152	0.00435329	0.0116873	84.3636	162.08
1810020O05Rik	5.09095	0	3.07419	0.957687	1.00967	0	0.915446	0.734801	0.194456	0.297977	2.72171	0.7207
1810021B22Rik	22.9093	11.7306	1.53709	19.1537	18.174	13.7196	14.6471	-0.53068	0.201552	0.306393	12.059	16.4236
1810022K09Rik	114.546	125.685	164.469	298.798	236.263	234.481	249.001	-0.86977	1.78744e-07	1.19437e-06	134.9	254.636
1810024B03Rik	2.54547	11.7306	6.14837	4.78844	5.04834	6.23619	9.15446	0.106051	0.825751	0.882252	6.80815	6.30686
1810026B05Rik	633.823	418.95	481.11	533.432	416.993	335.507	414.697	0.254161	0.108397	0.184823	511.294	425.157
1810026J23Rik	290.184	378.731	362.754	513.32	542.192	452.747	522.72	-0.544709	7.5261e-05	0.00030731	343.89	507.745
1810030O07Rik	351.275	378.731	378.125	371.583	323.094	310.562	357.939	0.123976	0.267947	0.383919	369.377	340.795
1810032O08Rik	185.82	122.333	142.95	99.5995	111.064	71.0925	128.162	0.510764	0.0116873	0.027878	150.368	102.479
1810034E14Rik	30.5457	21.7854	38.4273	22.9845	16.1547	19.9558	23.8016	0.498089	0.11218	0.190025	30.2528	20.7241
1810037I17Rik	201.092	241.315	245.935	419.467	366.51	556.268	319.491	-0.82195	7.16422e-09	5.97714e-08	229.448	415.434
1810041H14Rik	0	3.3516	9.22256	5.74612	4.03868	4.98895	4.57723	-0.0217783	0.967041	0.978728	4.19139	4.83774
1810041L15Rik	0	1.6758	3.07419	0	0	0	0.915446	0.747527	0.154787	0.247158	1.58333	0.228861
1810043G02Rik	244.366	118.982	224.416	113.007	134.286	204.547	205.06	0.250517	0.262439	0.377641	195.921	164.225
1810043H04Rik	17.8183	43.5708	30.7419	25.8576	30.2901	37.4171	43.026	-0.127149	0.650123	0.747944	30.7103	34.1477
1810044D09Rik	10.1819	6.7032	4.61128	7.6615	6.05801	9.9779	16.478	-0.409767	0.361368	0.482713	7.16546	10.0439
1810046K07Rik	2.54547	3.3516	4.61128	0	0	0	0	1.56896	0.0042892	0.0115379	3.50279	0
1810055G02Rik	45.8185	137.416	101.448	170.468	200.924	210.783	127.247	-0.854078	0.000198582	0.000737423	94.8941	177.356
1810058I24Rik	183.274	184.338	167.543	158.976	156.499	134.702	179.427	0.166728	0.25652	0.370891	178.385	157.401
1810062G17Rik	12.7274	5.0274	15.3709	19.1537	25.2417	24.9447	15.5626	-0.805568	0.0323922	0.067404	11.0419	21.2257
1810062O18Rik	7.63642	6.7032	0	0.957687	3.02901	2.49447	1.83089	0.704348	0.205844	0.311908	4.77987	2.07802
1810063I02Rik	0	0	0	0	1.00967	0	0	0.0276518	0.938781	NA	0	0.252417
1810064F22Rik	12.7274	6.7032	6.14837	10.5346	4.03868	4.98895	5.49268	0.260602	0.583195	0.690453	8.52632	6.26371
1810065E05Rik	0	0	0	0	0	1.24724	0.915446	-0.083881	0.843612	NA	0	0.540671
2010001A14Rik	28.0002	16.758	9.22256	18.1961	23.2224	13.7196	24.717	-0.217093	0.554576	0.665267	17.9936	19.9638
2010001E11Rik	7.63642	3.3516	4.61128	4.78844	2.01934	3.74171	1.83089	0.409609	0.461187	0.580619	5.19977	3.09509
2010003K11Rik	20.3638	40.2192	19.9822	7.6615	9.08702	1.24724	5.49268	1.78026	2.62231e-05	0.000117924	26.8551	5.87211
2010005H15Rik	2.54547	0	0	0.957687	0	0	0	0.132857	0.722184	NA	0.848491	0.239422
2010009K17Rik	5.09095	6.7032	3.07419	8.61918	2.01934	3.74171	5.49268	-0.0768809	0.88664	0.922709	4.95611	4.96823
2010010A06Rik	2.54547	3.3516	0	1.91537	0	0	0.915446	0.350432	0.47738	NA	1.96569	0.707705
2010012O05Rik	61.0914	85.4658	86.0772	67.9958	65.6285	57.3729	60.4194	0.336543	0.0711446	0.13015	77.5448	62.8542
2010016I18Rik	66.1823	23.4612	36.8902	15.323	8.07735	7.48342	10.0699	1.60611	0.000484512	0.00164664	42.1779	10.2384
2010106C02Rik	17.8183	8.379	18.4451	8.61918	3.02901	2.49447	3.66178	1.19812	0.0268683	0.0573105	14.8808	4.45111
2010106E10Rik	0	0	0	0	0	0	0	0	1	NA	0	0
2010107E04Rik	168.001	261.425	304.345	814.992	642.149	805.715	492.51	-1.413	5.222e-13	7.62429e-12	244.59	688.842
2010107G12Rik	7.63642	6.7032	4.61128	3.83075	4.03868	1.24724	2.74634	0.657742	0.23013	0.340421	6.31697	2.96575
2010107G23Rik	68.7278	48.5982	58.4096	64.165	64.6188	87.3066	119.923	-0.509218	0.0660028	0.122178	58.5785	84.0035
2010109A12Rik	10.1819	5.0274	10.7597	9.57687	2.01934	7.48342	7.32357	0.299505	0.519282	0.633718	8.65632	6.6008
2010109I03Rik	5.09095	1.6758	4.61128	0.957687	1.00967	0	0	1.39055	0.0150533	0.034713	3.79268	0.491839
2010111I01Rik	1384.74	732.325	896.126	1105.17	938.992	818.188	793.692	0.115608	0.547794	0.659768	1004.4	914.011
2010204K13Rik	7.63642	11.7306	7.68547	12.4499	15.145	4.98895	6.40812	-0.13552	0.76718	0.839943	9.0175	9.74801
2010300C02Rik	374.185	209.475	358.143	392.652	436.177	568.74	358.855	-0.478506	0.00807577	0.0201627	313.934	439.106
2010310C07Rik	2.54547	8.379	7.68547	4.78844	1.00967	3.74171	5.49268	0.45625	0.415098	0.536284	6.20331	3.75812
2010315B03Rik	460.731	310.023	428.849	643.566	502.815	571.235	384.487	-0.393403	0.00329826	0.00914843	399.868	525.526
2010320M18Rik	56.0004	41.895	58.4096	80.4457	91.8799	107.262	100.699	-0.865354	4.60317e-05	0.000196077	52.1017	95.0718
2200002D01Rik	20.3638	26.8128	36.8902	19.1537	37.3577	29.9337	87.8828	-0.610578	0.102705	0.176637	28.0223	43.582
2210011C24Rik	0	0	1.53709	0	0	0	0	0.169666	0.606287	NA	0.512365	0
2210013O21Rik	99.2735	115.63	106.059	129.288	139.334	132.207	122.67	-0.265155	0.115287	0.19425	106.988	130.875
2210015D19Rik	71.2733	63.6804	63.0208	118.753	109.044	107.262	84.221	-0.665042	0.000297647	0.00106348	65.9915	104.82
2210016F16Rik	231.638	313.375	285.899	459.69	449.303	511.367	382.656	-0.678097	2.00865e-08	1.55659e-07	276.971	450.754
2210016L21Rik	155.274	154.174	167.543	102.473	107.025	134.702	162.034	0.326622	0.0594298	0.111961	158.997	126.558
2210018M11Rik	577.823	459.169	434.998	391.694	355.403	402.858	357.024	0.365452	0.00113365	0.00353538	490.663	376.745
2210039B01Rik	17.8183	8.379	4.61128	4.78844	3.02901	3.74171	3.66178	0.87989	0.111395	0.188983	10.2695	3.80523
2210404O09Rik	56.0004	58.653	81.466	43.0959	34.3287	57.3729	44.8568	0.573191	0.00863085	0.0213564	65.3731	44.9136
2210406O10Rik	10.1819	8.379	6.14837	5.74612	5.04834	7.48342	9.15446	0.165183	0.723908	0.807302	8.23642	6.85809
2210408F21Rik	84.0007	50.274	59.9467	52.6728	31.2997	33.6754	40.2796	0.636	0.0209188	0.0460842	64.7404	39.4819
2210408I21Rik	193.456	117.306	135.264	181.003	149.431	114.746	108.023	0.0822325	0.679902	0.772147	148.675	138.301
2210409D07Rik	0	0	0	0	0	1.24724	0.915446	-0.0903068	0.84173	NA	0	0.540671
2210416O15Rik	10.1819	15.0822	7.68547	5.74612	4.03868	4.98895	6.40812	0.815869	0.0900087	0.158329	10.9832	5.29547
2210417A02Rik	2.54547	0	0	0	0	1.24724	0	0.271331	0.584746	0.691802	0.848491	0.311809
2300009A05Rik	12.7274	28.4886	21.5193	34.4767	45.4351	48.6423	29.2943	-0.758266	0.0141858	0.0329826	20.9118	39.4621
2310001H17Rik	78.9097	16.758	78.3918	112.049	88.8509	98.5318	92.46	-0.767907	0.00843265	0.0209272	58.0198	97.973
2310001K24Rik	2.54547	0	0	0.957687	1.00967	0	0.915446	-0.0330527	0.950198	0.966918	0.848491	0.7207
2310002D06Rik	0	0	0	0	0	1.24724	0	0.0347168	0.926666	NA	0	0.311809
2310002F09Rik	2.54547	8.379	3.07419	0.957687	0	0	3.66178	1.06146	0.0650946	0.120762	4.66622	1.15487
2310002L09Rik	22.9093	18.4338	21.5193	0	0	0	0	0.98921	0.0359611	0.0736139	20.9541	0
2310007B03Rik	5.09095	5.0274	3.07419	0	0	0	0	1.81717	0.00158937	0.00478104	4.39751	0
2310008N11Rik	0	0	0	0.957687	0	1.24724	0	-0.0254712	0.913705	NA	0	0.551231
2310009A05Rik	50.9095	75.411	70.7063	93.8533	89.8605	98.5318	88.7983	-0.4478	0.0132754	0.0311226	65.6756	92.761
2310009B15Rik	17.8183	21.7854	24.5935	30.646	39.3771	47.395	44.8568	-0.83444	0.00360555	0.00990299	21.3991	40.5687
2310010G23Rik	5.09095	1.6758	6.14837	2.87306	5.04834	3.74171	2.74634	0.253579	0.628339	0.729739	4.30504	3.60236
2310010J17Rik	28.0002	26.8128	13.8338	13.4076	9.08702	6.23619	8.23901	1.12622	0.0016756	0.00501409	22.8823	9.24246
2310011J03Rik	165.456	192.717	238.25	248.041	306.939	280.628	295.689	-0.506777	0.000624539	0.00207215	198.807	282.824
2310015A10Rik	315.639	199.42	221.341	110.134	101.977	102.273	157.457	1.02255	4.45725e-08	3.27135e-07	245.467	117.96
2310015D24Rik	7.63642	5.0274	7.68547	0	0	1.24724	0.915446	1.75118	0.00233658	0.0067497	6.7831	0.540671
2310020H05Rik	2.54547	0	1.53709	0	0	0	0	0.153466	0.559765	NA	1.36086	0
2310022A10Rik	137.456	83.79	78.3918	75.6573	47.4544	69.8453	53.0959	0.63555	0.00904508	0.0222696	99.8791	61.5132
2310022B05Rik	221.456	268.128	190.6	148.441	232.224	190.827	180.343	0.262574	0.0718428	0.131143	226.728	187.959
2310030G06Rik	99.2735	90.4932	61.4837	42.1382	49.4738	68.5981	116.262	0.243311	0.408364	0.52963	83.7501	69.1179
2310033P09Rik	91.6371	110.603	104.522	91.938	97.9379	107.262	95.2064	0.0692904	0.686799	0.777569	102.254	98.0862
2310034G01Rik	45.8185	20.1096	29.2048	37.3498	46.4448	46.1478	61.3349	-0.642398	0.0338756	0.0699903	31.711	47.8193
2310035C23Rik	1094.55	712.215	816.197	1305.33	1153.04	1275.92	1113.18	-0.483168	0.000263025	0.000952036	874.322	1211.87
2310036O22Rik	239.275	308.347	278.214	338.064	333.191	397.869	414.697	-0.417494	0.00267893	0.00762818	275.279	370.955
2310039H08Rik	30.5457	67.032	55.3354	98.6418	112.073	111.004	110.769	-1.00091	2.30506e-07	1.50622e-06	50.971	108.122
2310040G24Rik	7.63642	21.7854	10.7597	9.57687	14.1354	13.7196	10.9854	0.164132	0.698576	0.787611	13.3938	12.1043
2310045N01Rik	257.093	279.859	296.659	274.856	251.408	285.617	265.479	0.043759	0.720563	0.804768	277.87	269.34
2310047M10Rik	58.5459	77.0868	55.3354	53.6305	55.5318	71.0925	57.6731	0.091996	0.678154	0.770902	63.656	59.482
2310057J18Rik	2.54547	0	0	9.57687	9.08702	12.4724	2.74634	-2.03478	0.000238336	0.000870305	0.848491	8.47065
2310057M21Rik	73.8188	80.4384	86.0772	86.1918	86.8315	79.8232	81.4747	-0.0495851	0.790379	0.856043	80.1115	83.5803
2310061I04Rik	106.91	77.0868	36.8902	76.615	88.8509	89.8011	73.2357	-0.191345	0.483735	0.601164	73.629	82.1256
2310065F04Rik	7.63642	8.379	12.2967	0	0	0	0	1.21839	0.0105963	0.0256025	9.43739	0
2310067B10Rik	740.733	584.854	510.315	360.09	457.38	516.356	552.929	0.386899	0.01995	0.0441912	611.967	471.689
2310068J16Rik	2.54547	0	1.53709	2.87306	3.02901	3.74171	1.83089	-0.479843	0.394899	0.516011	1.36086	2.86867
2310069B03Rik	0	15.0822	1.53709	0	1.00967	0	0	1.54841	0.00660501	0.0169019	5.53976	0.252417
2310069G16Rik	0	0	1.53709	1.91537	1.00967	1.24724	0.915446	-0.292915	0.598317	0.703851	0.512365	1.27193
2310075C17Rik	2.54547	3.3516	0	0	0	0	0	0.267615	0.383106	NA	1.96569	0
2400006E01Rik	33.0912	1.6758	12.2967	5.74612	10.0967	1.24724	16.478	0.537841	0.307523	0.427378	15.6879	8.39202
2410002F23Rik	654.187	417.274	473.425	316.994	382.664	293.101	361.601	0.582844	0.000293169	0.00104832	514.962	338.59
2410003L11Rik	0	0	0	1.91537	0	1.24724	0	-0.0913414	0.74924	NA	0	0.790653
2410004B18Rik	86.5461	122.333	95.2998	98.6418	118.131	107.262	99.7836	-0.040849	0.804192	0.866361	101.393	105.955
2410004I01Rik	0	0	0	0	0	1.24724	0	0.0363569	0.923431	NA	0	0.311809
2410004P03Rik	0	1.6758	0	0	0	0	2.74634	0.0593578	0.912181	0.940195	0.5586	0.686584
2410006H16Rik	165.456	258.073	324.327	137.907	151.45	153.41	237.1	0.546071	0.0116357	0.027781	249.285	169.967
2410015M20Rik	137.456	269.804	270.528	536.305	476.564	515.109	380.825	-1.05044	5.11483e-11	5.84731e-10	225.929	477.201
2410016O06Rik	101.819	118.982	126.042	230.803	285.736	202.052	192.244	-0.945908	3.35103e-06	1.7985e-05	115.614	227.709
2410017I17Rik	0	0	1.53709	0	1.00967	1.24724	0	0.135354	0.798873	0.86241	0.512365	0.564227
2410018L13Rik	0	0	0	1.91537	0	0	0	-0.0583014	0.91205	0.940115	0	0.478844
2410021H03Rik	2.54547	5.0274	6.14837	2.87306	6.05801	2.49447	2.74634	0.288234	0.589425	0.69551	4.57375	3.54297
2410089E03Rik	1000.37	752.434	714.749	444.367	421.032	330.518	468.708	0.961544	3.45161e-10	3.49971e-09	822.518	416.156
2410127L17Rik	45.8185	75.411	79.9289	70.8688	71.6865	68.5981	76.8975	-0.0390469	0.833004	0.887592	67.0528	72.0127
2410131K14Rik	137.456	140.767	159.858	221.226	205.972	164.635	180.343	-0.404646	0.00752936	0.0189612	146.027	193.044
2500002B13Rik	10.1819	13.4064	6.14837	7.6615	9.08702	11.2251	10.0699	0.0854515	0.829736	0.885338	9.91222	9.51089
2500004C02Rik	40.7276	40.2192	49.187	29.6883	24.2321	23.6975	29.2943	0.701016	0.00487128	0.0129082	43.3779	26.728
2510002D24Rik	112.001	88.8174	126.042	96.7264	103.996	88.5539	108.023	0.119749	0.451068	0.571365	108.953	99.3247
2510003B16Rik	12.7274	1.6758	12.2967	6.70381	0	6.23619	4.57723	0.711575	0.169446	0.266295	8.89997	4.37931
2510009E07Rik	366.548	502.74	384.273	327.529	393.771	281.876	355.193	0.303698	0.0142545	0.0331119	417.854	339.592
2510039O18Rik	325.821	375.379	348.92	291.137	449.303	472.703	519.973	-0.307569	0.0272072	0.0579529	350.04	433.279
2610001J05Rik	76.3642	87.1416	129.116	160.891	162.557	133.454	149.218	-0.577496	0.00763025	0.0191891	97.5406	151.53
2610002M06Rik	252.002	340.187	385.811	317.952	303.91	291.854	276.465	0.159459	0.268363	0.384422	326	297.545
2610005L07Rik	124.728	78.7626	96.8369	105.346	87.8412	77.3287	113.515	0.0427029	0.852411	0.900785	100.109	96.0077
2610008E11Rik	710.187	527.877	514.926	347.64	311.988	285.617	315.829	0.873737	1.12928e-23	4.64104e-22	584.33	315.269
2610015P09Rik	356.366	170.932	184.451	133.119	117.122	123.477	101.614	0.930067	3.65509e-06	1.94814e-05	237.25	118.833
2610016A17Rik	30.5457	53.6256	39.9644	20.1114	8.07735	18.7086	10.0699	1.32966	0.000917303	0.00293015	41.3786	14.2418
2610020C07Rik	45.8185	40.2192	47.6499	34.4767	27.2611	42.4061	40.2796	0.264844	0.448331	0.569063	44.5625	36.1059
2610020H08Rik	241.82	107.251	166.006	88.1072	68.6575	120.982	83.3056	0.868116	4.45423e-05	0.000190143	171.692	90.2631
2610027K06Rik	35.6366	18.4338	18.4451	13.4076	5.04834	3.74171	13.7317	1.07686	0.0263436	0.0563228	24.1719	8.98234
2610028E06Rik	0	0	0	0	1.00967	0	0	0.03232	0.933887	NA	0	0.252417
2610028H24Rik	2.54547	0	0	4.78844	2.01934	1.24724	4.57723	-1.1201	0.0360307	0.0737309	0.848491	3.15806
2610035D17Rik	63.6369	56.9772	44.5757	48.842	36.3481	43.6533	64.0812	0.174341	0.536099	0.648844	55.0633	48.2312
2610037D02Rik	7.63642	5.0274	0	5.74612	14.1354	13.7196	10.9854	-1.28187	0.0152541	0.0351201	4.22127	11.1466
2610042L04Rik	2.54547	6.7032	1.53709	0.957687	3.02901	0	0.915446	0.867735	0.128663	0.212867	3.59526	1.22553
2610044O15Rik8	180.729	137.416	124.505	113.965	110.054	119.735	155.626	0.214109	0.174813	0.273197	147.55	124.845
2610100L16Rik	0	0	0	1.91537	0	1.24724	0.915446	-0.395568	0.426517	NA	0	1.01951
2610203C22Rik	35.6366	16.758	35.3532	40.2229	31.2997	51.1367	29.2943	-0.360863	0.224622	0.334083	29.2493	37.9884
2610206C17Rik	0	3.3516	0	0	1.00967	0	4.57723	0.0486432	0.932197	0.954619	1.1172	1.39672
2610301B20Rik	91.6371	145.795	121.43	106.303	72.6962	86.0594	91.5446	0.451742	0.0141155	0.0328406	119.621	89.1508
2610305D13Rik	68.7278	87.1416	59.9467	73.7419	86.8315	82.3177	64.0812	-0.0797461	0.730626	0.812549	71.9387	76.7431
2610306M01Rik	12.7274	30.1644	30.7419	25.8576	29.2804	18.7086	21.9707	0.0852332	0.778498	0.847422	24.5445	23.9543
2610307P16Rik	389.458	464.197	250.546	90.0226	69.6672	64.8563	182.174	1.73665	6.91936e-08	4.94352e-07	368.067	101.68
2610316D01Rik	2.54547	1.6758	0	1.91537	5.04834	3.74171	3.66178	-0.726366	0.19122	0.293943	1.40709	3.5918
2610318N02Rik	0	3.3516	3.07419	2.87306	5.04834	6.23619	1.83089	-0.580815	0.304898	0.424361	2.14193	3.99712
2610507B11Rik	4472.4	4100.68	4142.47	7232.45	6497.22	6782.48	5513.73	-0.614352	4.13273e-18	1.01483e-16	4238.52	6506.47
2610507I01Rik	389.458	187.69	239.787	369.667	317.036	295.595	335.053	-0.316143	0.0370112	0.0753291	272.311	329.338
2610524H06Rik	17.8183	78.7626	69.1692	39.2652	53.5124	73.587	32.0406	0.194446	0.56052	0.671037	55.25	49.6013
2610528A11Rik	15.2728	1.6758	9.22256	18.1961	33.3191	43.6533	17.3935	-1.5415	0.000838217	0.00269988	8.72374	28.1405
2610528J11Rik	30.5457	11.7306	32.279	125.457	102.986	120.982	74.1511	-1.9895	1.2828e-12	1.79896e-11	24.8518	105.894
2700029M09Rik	160.365	187.69	275.14	237.506	214.05	331.765	124.501	-0.100881	0.655197	0.751882	207.731	226.955
2700038G22Rik	81.4552	40.2192	59.9467	51.7151	57.5511	39.9116	59.504	0.156357	0.590921	0.696973	60.5403	52.1705
2700046A07Rik	2.54547	5.0274	1.53709	0	3.02901	3.74171	0.915446	0.444934	0.431558	0.552407	3.03666	1.92154
2700046G09Rik	56.0004	20.1096	32.279	29.6883	18.174	12.4724	17.3935	0.756922	0.0166336	0.0378217	36.1297	19.432
2700049A03Rik	567.641	351.918	378.125	297.841	233.234	344.238	249.001	0.592083	4.23485e-05	0.000182091	432.561	281.078
2700054A10Rik	30.5457	68.7078	38.4273	16.2807	21.203	14.9668	38.4487	0.938388	0.00887225	0.0218825	45.8936	22.7248
2700060E02Rik	412.367	720.594	751.639	1553.37	1121.74	1379.44	1050.93	-0.972856	1.93661e-09	1.74609e-08	628.2	1276.37
2700062C07Rik	76.3642	85.4658	106.059	129.288	133.276	134.702	120.839	-0.498641	0.00574463	0.0149349	89.2965	129.526
2700069I18Rik	5.09095	3.3516	3.07419	0	1.00967	0	0	1.54639	0.00706338	0.0179173	3.83891	0.252417
2700070H01Rik	0	0	1.53709	1.91537	0	0	0	0.0498931	0.908704	NA	0.512365	0.478844
2700081O15Rik	450.549	393.813	273.603	158.976	161.547	162.141	220.622	1.05069	3.9e-12	5.18268e-11	372.655	175.822
2700094K13Rik	58.5459	92.169	92.2256	58.4189	76.7348	109.757	96.1218	-0.0393079	0.858329	0.903949	80.9802	85.2581
2700097O09Rik	66.1823	43.5708	49.187	79.488	64.6188	41.1588	54.9268	-0.202027	0.393989	0.515163	52.98	60.0481
2700099C18Rik	50.9095	35.1918	50.7241	25.8576	29.2804	91.0483	21.0553	0.0967929	0.805465	0.867352	45.6085	41.8104
2810001G20Rik	73.8188	45.2466	64.5579	49.7997	34.3287	39.9116	54.0113	0.416408	0.0728332	0.132583	61.2078	44.5128
2810002D19Rik	35.6366	38.5434	46.1128	34.4767	38.3674	42.4061	47.6032	0.032872	0.889917	0.925158	40.0976	40.7134
2810004N23Rik	333.457	308.347	292.048	337.106	337.229	284.37	314.913	-0.0434685	0.725209	0.808297	311.284	318.405
2810006K23Rik	61.0914	78.7626	69.1692	52.6728	78.7542	82.3177	59.504	0.0548185	0.792207	0.857403	69.6744	68.3122
2810013P06Rik	134.91	117.306	87.6143	120.669	114.093	96.0373	143.725	-0.0823205	0.670336	0.764512	113.277	118.631
2810021J22Rik	142.547	85.4658	121.43	75.6573	76.7348	78.576	90.6291	0.506488	0.00396315	0.0107653	116.481	80.3993
2810025M15Rik	58.5459	85.4658	70.7063	96.7264	111.064	123.477	87.8828	-0.505295	0.0161151	0.0368317	71.5727	104.787
2810029C07Rik	10.1819	5.0274	9.22256	5.74612	3.02901	7.48342	2.74634	0.643265	0.169131	0.265871	8.14395	4.75122
2810032G03Rik	10.1819	10.0548	21.5193	114.922	89.8605	61.1146	43.9414	-2.17942	4.26741e-11	4.92932e-10	13.9187	77.4598
2810047C21Rik1	5.09095	3.3516	3.07419	2.87306	1.00967	3.74171	5.49268	0.14013	0.796177	0.860755	3.83891	3.27928
2810403A07Rik	1267.65	794.329	928.405	987.375	1052.07	1037.7	1066.49	-0.076827	0.474117	0.592072	996.793	1035.91
2810403D21Rik	17.8183	20.1096	33.8161	19.1537	16.1547	8.73066	17.3935	0.613803	0.0947193	0.165386	23.9147	15.3581
2810405F15Rik	2.54547	0	1.53709	0.957687	0	1.24724	0.915446	0.14446	0.778254	NA	1.36086	0.780093
2810408A11Rik	78.9097	40.2192	41.5015	18.1961	20.1934	23.6975	36.6178	0.999605	0.000795078	0.00257682	53.5435	24.6762
2810408I11Rik	0	1.6758	13.8338	31.6037	26.2514	62.3619	5.49268	-1.82267	0.00023551	0.000860693	5.16988	31.4274
2810410L24Rik	94.1826	48.5982	35.3532	29.6883	25.2417	22.4503	41.1951	0.865417	0.00328573	0.00911767	59.378	29.6438
2810417H13Rik	106.91	229.585	278.214	146.526	299.872	684.733	54.0113	-0.43747	0.28878	0.406743	204.903	296.286
2810428I15Rik	73.8188	103.9	112.208	63.2073	83.8025	108.51	92.46	0.152495	0.452236	0.572437	96.6421	86.9949
2810429I04Rik	10.1819	18.4338	21.5193	1.91537	2.01934	6.23619	2.74634	1.9882	1.45395e-05	6.87441e-05	16.7117	3.22931
2810433D01Rik	2.54547	20.1096	18.4451	6.70381	10.0967	13.7196	9.15446	0.47668	0.273886	0.390411	13.7001	9.91864
2810442N19Rik	17.8183	15.0822	16.908	13.4076	6.05801	8.73066	5.49268	0.791465	0.0803024	0.143893	16.6029	8.42224
2810454H06Rik	20.3638	33.516	15.3709	27.7729	21.203	19.9558	19.2244	0.0980398	0.751782	0.828963	23.0836	22.039
2810459M11Rik	188.365	36.8676	242.861	107.261	137.315	62.3619	67.743	0.63479	0.0636949	0.118586	156.031	93.6702
2810468N07Rik	56.0004	35.1918	72.2434	15.323	28.2707	18.7086	16.478	1.34403	0.000109196	0.000430434	54.4785	19.6951
2810471M01Rik	0	0	0	0	0	0	0	0	1	NA	0	0
2810474O19Rik	1786.92	1318.85	1351.11	1204.77	840.044	874.313	1164.45	0.531964	6.93728e-08	4.95432e-07	1485.63	1020.89
2900005J15Rik	104.364	53.6256	64.5579	29.6883	34.3287	27.4392	23.8016	1.24541	9.64024e-06	4.71625e-05	74.1827	28.8145
2900008C10Rik	0	8.379	10.7597	5.74612	3.02901	3.74171	5.49268	0.45901	0.358455	0.480013	6.37955	4.50238
2900009J06Rik	0	0	0	0	3.02901	1.24724	0.915446	-0.563006	0.287383	0.405139	0	1.29792
2900011O08Rik	0	5.0274	1.53709	0.957687	1.00967	0	0	0.987598	0.0867262	0.153697	2.18816	0.491839
2900026A02Rik	888.371	799.357	614.837	445.324	541.183	472.703	799.184	0.434013	0.0186379	0.0416801	767.522	564.599
2900041M22Rik	2.54547	5.0274	3.07419	2.87306	4.03868	4.98895	2.74634	0.0193135	0.971537	0.981823	3.54902	3.66176
2900052N01Rik	0	0	0	0	0	0	0	0	1	1	0	0
2900057B20Rik	28.0002	41.895	29.2048	9.57687	9.08702	8.73066	5.49268	1.49808	0.00339199	0.00937299	33.0333	8.22181
2900060B14Rik	7.63642	10.0548	24.5935	22.0268	17.1644	21.203	13.7317	-0.278144	0.493827	0.610373	14.0949	18.5315
2900076A07Rik	89.0916	51.9498	79.9289	86.1918	74.7155	54.8784	58.5885	0.0806962	0.746048	0.824167	73.6568	68.5936
2900097C17Rik	1636.74	1739.48	1507.89	2174.91	1974.91	1945.69	1763.15	-0.262963	0.00751419	0.0189283	1628.04	1964.66
3000002C10Rik	63.6369	25.137	41.5015	68.9535	58.5608	69.8453	32.9561	-0.445632	0.109844	0.186834	43.4251	57.5789
3010001F23Rik	7.63642	6.7032	3.07419	2.87306	3.02901	2.49447	0	0.974505	0.0710599	0.130021	5.8046	2.09914
3010026O09Rik	48.364	26.8128	47.6499	42.1382	38.3674	53.6312	32.9561	-0.0255983	0.927522	0.951313	40.9422	41.7732
3100003L05Rik	0	1.6758	0	0	2.01934	0	0.915446	-0.0379827	0.92923	NA	0.5586	0.733696
3110001I22Rik	132.365	72.0594	55.3354	83.3188	67.6478	51.1367	76.8975	0.238849	0.330282	0.451654	86.5865	69.7502
3110002H16Rik	305.457	318.402	310.493	377.329	334.2	340.496	360.686	-0.184301	0.0764485	0.138018	311.451	353.178
3110009E18Rik	15.2728	13.4064	33.8161	11.4922	11.1064	8.73066	10.9854	0.913253	0.00886596	0.0218711	20.8318	10.5787
3110021A11Rik	2.54547	8.379	6.14837	2.87306	3.02901	2.49447	4.57723	0.61877	0.235769	0.346941	5.69095	3.24344
3110021N24Rik	45.8185	46.9224	55.3354	31.6037	20.1934	19.9558	29.2943	0.946018	8.16204e-05	0.000330842	49.3588	25.2618
3110035E14Rik	7.63642	13.4064	19.9822	29.6883	13.1257	38.6644	15.5626	-0.654242	0.153286	0.245308	13.675	24.2602
3110039I08Rik	491.277	434.032	424.238	245.168	232.224	170.872	226.115	1.01203	1.77391e-06	9.98541e-06	449.849	218.595
3110040N11Rik	58.5459	95.5206	109.134	154.188	161.547	150.916	116.262	-0.674735	4.37087e-05	0.000187034	87.7334	145.728
3110043O21Rik	463.276	509.443	341.235	229.845	202.943	218.267	338.715	0.807358	2.65746e-06	1.45305e-05	437.985	247.442
3110045C21Rik	7.63642	6.7032	9.22256	21.0691	15.145	14.9668	9.15446	-0.769863	0.0645564	0.119901	7.85406	15.0839
3110052M02Rik	140.001	107.251	124.505	143.653	115.102	120.982	106.192	0.0253859	0.874911	0.915547	123.919	121.482
3110056K07Rik	173.092	117.306	126.042	105.346	87.8412	86.0594	95.2064	0.529123	0.00797333	0.0199495	138.813	93.6131
3110057O12Rik	94.1826	60.3288	90.6885	110.134	69.6672	79.8232	107.107	-0.172535	0.38876	0.509639	81.7333	91.6829
3110062M04Rik	71.2733	41.895	49.187	26.8152	39.3771	31.1809	50.3495	0.492323	0.0704694	0.129183	54.1184	36.9307
3110070M22Rik	12.7274	3.3516	3.07419	4.78844	4.03868	8.73066	6.40812	-0.141038	0.787051	0.853644	6.38439	5.99147
3110079O15Rik	0	50.274	4.61128	0.957687	5.04834	4.98895	3.66178	1.48111	0.00748804	0.0188652	18.2951	3.66419
3110082I17Rik	35.6366	62.0046	69.1692	102.473	112.073	129.713	77.8129	-0.863038	0.000363441	0.00127043	55.6035	105.518
3200001D21Rik	20.3638	13.4064	21.5193	14.3653	12.116	12.4724	10.0699	0.497396	0.186639	0.288407	18.4298	12.2559
3300002I08Rik	15.2728	23.4612	16.908	22.0268	14.1354	12.4724	10.9854	0.288684	0.450335	0.570763	18.5474	14.905
3300002P13Rik	0	0	4.61128	0	0	0	0	0.4201	0.285204	0.402921	1.53709	0
3300005D01Rik	2.54547	5.0274	1.53709	0.957687	2.01934	0	1.83089	0.633754	0.270655	0.386737	3.03666	1.20198
3425401B19Rik	124.728	108.927	164.469	0	0	0	0	1.4511	0.00467396	0.0124447	132.708	0
3632451O06Rik	33.0912	20.1096	33.8161	53.6305	40.3868	48.6423	26.5479	-0.482241	0.154802	0.247158	29.0056	42.3019
3632454L22Rik	20.3638	21.7854	30.7419	14.3653	14.1354	12.4724	11.9008	0.786107	0.0443095	0.087759	24.297	13.2185
3830403N18Rik	0	0	3.07419	0.957687	0	0	0	0.628484	0.26117	0.376121	1.02473	0.239422
3830406C13Rik	252.002	251.37	204.433	278.687	243.33	236.975	247.17	-0.0900463	0.519026	0.633647	235.935	251.541
3830408C21Rik	25.4547	10.0548	18.4451	12.4499	5.04834	4.98895	5.49268	1.11854	0.00622909	0.0160417	17.9849	6.99498
3830417A13Rik	2.54547	1.6758	1.53709	1.91537	0	1.24724	0.915446	0.501973	0.381387	0.502555	1.91946	1.01951
3830432H09Rik	0	5.0274	6.14837	2.87306	2.01934	2.49447	6.40812	0.173622	0.750483	0.828145	3.72526	3.44875
3930402G23Rik	2.54547	5.0274	3.07419	17.2384	11.1064	8.73066	7.32357	-1.24865	0.0103252	0.0250257	3.54902	11.0997
4430402I18Rik	38.1821	20.1096	19.9822	8.61918	10.0967	9.9779	4.57723	1.40538	0.000258547	0.000936783	26.0913	8.31775
4631405J19Rik	15.2728	10.0548	13.8338	90.9803	61.5898	73.587	40.2796	-2.20191	1.79557e-08	1.4031e-07	13.0538	66.6092
4632404H12Rik	112.001	43.5708	73.7805	74.6996	56.5415	69.8453	81.4747	0.0469237	0.850049	0.898908	76.4507	70.6403
4632415L05Rik	252.002	217.854	230.564	295.925	233.234	253.189	264.564	-0.171837	0.142557	0.231234	233.473	261.728
4632427E13Rik	216.365	117.306	164.469	54.5882	56.5415	72.3398	67.743	1.31609	1.94059e-07	1.28797e-06	166.047	62.8031
4632428C04Rik	7.63642	11.7306	9.22256	3.83075	7.06768	7.48342	8.23901	0.418876	0.365193	0.486504	9.52986	6.65522
4632428N05Rik	720.369	752.434	800.826	440.536	458.39	422.813	608.772	0.646625	6.28026e-05	0.000260027	757.876	482.628
4732416N19Rik	5.09095	1.6758	6.14837	3.83075	2.01934	0	4.57723	0.382115	0.500075	0.616123	4.30504	2.60683
4732456N10Rik	0	0	0	0.957687	3.02901	1.24724	6.40812	-0.269059	0.227595	NA	0	2.91051
4732471J01Rik	190.911	82.1142	99.9111	44.0536	35.3384	26.192	68.6584	1.37856	5.68774e-06	2.92188e-05	124.312	43.5606
4732490B19Rik	38.1821	11.7306	12.2967	61.292	51.4931	92.2956	134.571	-1.83517	2.84184e-05	0.000126864	20.7365	84.9128
4732491K20Rik	30.5457	40.2192	19.9822	19.1537	22.2127	23.6975	19.2244	0.477922	0.130487	0.21519	30.249	21.0721
4831440E17Rik	63.6369	50.274	73.7805	77.5727	57.5511	54.8784	51.265	0.0590904	0.794955	0.859805	62.5638	60.3168
4833411C07Rik	7.63642	1.6758	16.908	18.1961	5.04834	3.74171	7.32357	-0.00795621	0.986699	0.991951	8.74008	8.57742
4833412C05Rik	0	0	1.53709	0	0	0	0	0.598498	0.254595	0.368625	0.512365	0
4833415N18Rik	0	0	0	0	0	0	0	0	1	NA	0	0
4833417C18Rik	12.7274	11.7306	16.908	9.57687	7.06768	3.74171	10.0699	0.711501	0.105075	0.180119	13.7887	7.61404
4833418N02Rik	35.6366	36.8676	36.8902	29.6883	26.2514	14.9668	21.0553	0.630159	0.0258845	0.055468	36.4648	22.9904
4833419F23Rik	2.54547	8.379	4.61128	1.91537	2.01934	4.98895	3.66178	0.638471	0.211042	0.318203	5.17859	3.14636
4833420G17Rik	700.005	539.608	579.484	433.832	287.756	397.869	403.712	0.651972	0.000219788	0.000809398	606.366	380.792
4833422C13Rik	40.7276	26.8128	24.5935	28.7306	18.174	17.4613	23.8016	0.38585	0.274457	0.391163	30.7113	22.0419
4833422M21Rik	2.54547	1.6758	1.53709	0	1.00967	1.24724	0	0.668384	0.228051	0.337992	1.91946	0.564227
4833423E24Rik	2.54547	0	0	0	0	0	0	0.179803	0.589088	NA	0.848491	0
4833427F10Rik	5.09095	5.0274	4.61128	2.87306	2.01934	0	1.83089	0.923252	0.100285	0.173298	4.90988	1.68082
4833427G06Rik	2.54547	0	0	0	1.00967	1.24724	0	0.0445998	0.914551	NA	0.848491	0.564227
4833439L19Rik	598.186	883.147	668.636	1170.29	1134.87	1245.99	1073.82	-0.672083	6.54475e-09	5.48092e-08	716.656	1156.24
4921504A21Rik	10.1819	3.3516	12.2967	2.87306	4.03868	2.49447	2.74634	1.09991	0.0330448	0.0685691	8.61008	3.03814
4921506M07Rik	38.1821	62.0046	16.908	0.957687	1.00967	0	4.57723	3.45223	3.30677e-13	4.92934e-12	39.0316	1.63615
4921507L20Rik	50.9095	23.4612	29.2048	22.9845	20.1934	13.7196	22.8861	0.628813	0.11299	0.191087	34.5252	19.9459
4921507P07Rik	40.7276	28.4886	24.5935	19.1537	11.1064	23.6975	24.717	0.586614	0.0718378	0.131143	31.2699	19.6687
4921511C10Rik	50.9095	23.4612	30.7419	35.4344	23.2224	21.203	26.5479	0.282384	0.511615	0.627077	35.0375	26.6019
4921511H03Rik	7.63642	8.379	6.14837	14.3653	9.08702	8.73066	14.6471	-0.535837	0.312774	0.432918	7.38793	11.7075
4921511I17Rik	17.8183	10.0548	15.3709	10.5346	12.116	1.24724	9.15446	0.545891	0.28908	0.4071	14.4147	8.26307
4921513I03Rik	7.63642	11.7306	9.22256	5.74612	4.03868	3.74171	3.66178	0.843241	0.0996464	0.172395	9.52986	4.29707
4921518K17Rik	38.1821	35.1918	26.1306	0.957687	5.04834	1.24724	1.83089	2.57642	3.46046e-06	1.85386e-05	33.1682	2.27104
4921524J17Rik	76.3642	88.8174	69.1692	134.076	142.363	154.657	140.063	-0.8345	1.9617e-06	1.0966e-05	78.1169	142.79
4921525O09Rik	0	0	0	1.91537	1.00967	0	0.915446	-0.0724442	0.73402	NA	0	0.960122
4921531C22Rik	43.2731	33.516	39.9644	44.0536	47.4544	38.6644	46.6877	-0.18088	0.466761	0.58548	38.9178	44.215
4921534H16Rik	2.54547	1.6758	1.53709	0	0	1.24724	0.915446	0.676867	0.22972	0.340012	1.91946	0.540671
4921536K21Rik	2.54547	3.3516	9.22256	12.4499	4.03868	12.4724	10.9854	-0.70193	0.166344	0.262156	5.03988	9.98658
4921539E11Rik	0	1.6758	0	2.87306	0	0	0	-0.0331047	0.929806	NA	0.5586	0.718265
4930402H24Rik	1198.92	1147.92	754.713	636.862	565.415	463.972	688.415	0.796115	2.41663e-09	2.15602e-08	1033.85	588.666
4930404H11Rik	0	0	0	1.91537	0	1.24724	0.915446	-0.411978	0.427769	0.548466	0	1.01951
4930404I05Rik	28.0002	23.4612	29.2048	22.0268	18.174	12.4724	20.1398	0.492377	0.167508	0.26367	26.8887	18.2033
4930404N11Rik	76.3642	87.1416	110.671	86.1918	158.518	168.377	96.1218	-0.440527	0.0747656	0.135517	91.3922	127.302
4930405A10Rik	17.8183	1.6758	7.68547	3.83075	3.02901	1.24724	10.9854	0.501936	0.36739	0.488844	9.05986	4.77309
4930405A21Rik	2.54547	6.7032	4.61128	4.78844	4.03868	6.23619	4.57723	-0.00422871	0.993345	0.9966	4.61999	4.91013
4930405J17Rik	45.8185	10.0548	16.908	61.292	24.2321	33.6754	46.6877	-0.748477	0.134776	0.221045	24.2605	41.4718
4930405O22Rik	71.2733	60.3288	64.5579	76.615	48.4641	37.4171	50.3495	0.235568	0.5681	0.677461	65.3867	53.2114
4930406D18Rik	2.54547	0	1.53709	5.74612	0	0	3.66178	-0.51182	0.312325	0.432428	1.36086	2.35198
4930412B13Rik	0	0	0	0	0	0	0	0	1	NA	0	0
4930412C18Rik	48.364	46.9224	16.908	22.0268	13.1257	19.9558	19.2244	0.887665	0.00707135	0.0179324	37.3981	18.5832
4930412O13Rik	336.003	258.073	264.38	174.299	163.566	199.558	176.681	0.6242	0.0318223	0.0663388	286.152	178.526
4930413F20Rik	12.7274	8.379	15.3709	25.8576	14.1354	21.203	19.2244	-0.663126	0.135526	0.222009	12.1591	20.1051
4930413G21Rik	2.54547	13.4064	18.4451	1.91537	3.02901	4.98895	6.40812	1.12319	0.0349876	0.0718946	11.4657	4.08536
4930414N06Rik	12.7274	5.0274	9.22256	7.6615	8.07735	6.23619	8.23901	0.0892537	0.860361	0.905444	8.99244	7.55351
4930415F15Rik	2.54547	0	0	6.70381	1.00967	1.24724	0.915446	-0.680322	0.225136	0.334761	0.848491	2.46904
4930415O20Rik	15.2728	11.7306	15.3709	9.57687	9.08702	6.23619	8.23901	0.638257	0.113071	0.191186	14.1248	8.28477
4930417O13Rik	0	0	0	0	0	0	0	0	1	1	0	0
4930419G24Rik	2.54547	3.3516	3.07419	3.83075	0	1.24724	0	0.415959	0.426189	0.546993	2.99042	1.2695
4930425L21Rik	0	0	0	0	0	0	0.915446	0.101713	0.838426	0.890862	0	0.228861
4930426D05Rik	0	0	0	0	0	0	0.915446	0.011497	0.95609	NA	0	0.228861
4930426L09Rik	0	1.6758	0	2.87306	0	1.24724	0	-0.0165299	0.976739	0.98523	0.5586	1.03007
4930427A07Rik	81.4552	100.548	147.561	90.9803	139.334	382.902	62.2503	-0.502202	0.13827	0.225526	109.855	168.867
4930428E07Rik	2.54547	0	0	0	1.00967	0	0	0.0785427	0.792306	NA	0.848491	0.252417
4930429B21Rik	2.54547	1.6758	4.61128	2.87306	3.02901	1.24724	2.74634	0.240857	0.656805	0.753338	2.94419	2.47391
4930429D17Rik	0	3.3516	0	0.957687	0	0	0	0.234716	0.529065	NA	1.1172	0.239422
4930429F24Rik	17.8183	21.7854	15.3709	17.2384	12.116	14.9668	10.0699	0.408371	0.274726	0.391514	18.3249	13.5978
4930430F08Rik	38.1821	46.9224	47.6499	48.842	44.4254	63.6091	36.6178	-0.0808783	0.749514	0.827485	44.2515	48.3736
4930430J02Rik	5.09095	0	3.07419	1.91537	0	0	0.915446	0.71766	0.197616	0.301857	2.72171	0.707705
4930431F12Rik	0	0	0	0.957687	0	0	1.83089	-0.184311	0.648571	NA	0	0.697145
4930431P03Rik	96.728	31.8402	79.9289	173.341	155.489	139.691	130.909	-1.13574	6.94477e-07	4.18667e-06	69.499	149.857
4930432J09Rik	0	0	0	0	0	1.24724	1.83089	-0.279807	0.589075	NA	0	0.769532
4930432K21Rik	25.4547	36.8676	39.9644	16.2807	16.1547	18.7086	12.8162	1.01093	0.00311583	0.00871567	34.0956	15.99
4930438E09Rik	10.1819	13.4064	10.7597	1.91537	7.06768	4.98895	6.40812	0.952116	0.042994	0.085516	11.4493	5.09503
4930443O20Rik	20.3638	18.4338	19.9822	12.4499	9.08702	4.98895	14.6471	0.776239	0.0663532	0.122749	19.5933	10.2933
4930444F02Rik	2.54547	0	1.53709	1.91537	3.02901	0	0.915446	-0.224641	0.684066	0.775388	1.36086	1.46496
4930444P10Rik	2.54547	5.0274	0	0	0	0	0	1.14348	0.030832	0.0645885	2.52429	0
4930445N18Rik	5.09095	0	0	0.957687	2.01934	3.74171	1.83089	-0.348681	0.522789	0.636966	1.69698	2.13741
4930447A16Rik	53.455	6.7032	10.7597	7.6615	6.05801	8.73066	6.40812	1.16649	0.0260764	0.0558456	23.6393	7.21457
4930447C04Rik	2.54547	1.6758	0	0.957687	0	0	0	0.649219	0.234682	0.345743	1.40709	0.239422
4930447F24Rik	2.54547	5.0274	3.07419	0	0	0	0.915446	1.43685	0.0109367	0.0263283	3.54902	0.228861
4930447K03Rik	5.09095	1.6758	3.07419	0.957687	1.00967	0	3.66178	0.670031	0.228774	0.338894	3.28031	1.40728
4930447M23Rik	5.09095	5.0274	0	1.91537	2.01934	1.24724	2.74634	0.438655	0.431441	0.552297	3.37278	1.98207
4930447N08Rik	0	5.0274	3.07419	1.91537	2.01934	6.23619	4.57723	-0.284515	0.618665	0.721288	2.70053	3.68703
4930448I18Rik	0	0	1.53709	0	1.00967	2.49447	0	-0.0818156	0.855765	NA	0.512365	0.876036
4930449E18Rik	20.3638	15.0822	7.68547	11.4922	6.05801	6.23619	11.9008	0.446603	0.380465	0.50158	14.3772	8.92181
4930451G09Rik	140.001	43.5708	135.264	71.8265	67.6478	114.746	96.1218	0.218029	0.348905	0.470561	106.279	87.5855
4930452B06Rik	30.5457	1.6758	18.4451	2.87306	7.06768	22.4503	3.66178	0.645245	0.22637	0.335981	16.8889	9.0132
4930452G13Rik	5.09095	3.3516	0	0	0	0	0.915446	0.280043	0.360557	NA	2.81418	0.228861
4930453N24Rik	249.456	301.644	258.232	393.609	336.22	427.802	303.928	-0.410209	0.00264584	0.00754726	269.777	365.39
4930455C13Rik	25.4547	13.4064	26.1306	19.1537	11.1064	8.73066	13.7317	0.562644	0.18864	0.290848	21.6639	13.1806
4930455D15Rik	0	0	0	0.957687	0	0	0.915446	-0.0529091	0.870029	NA	0	0.468283
4930455G09Rik	5.09095	3.3516	10.7597	4.78844	5.04834	1.24724	8.23901	0.323347	0.503386	0.619276	6.40073	4.83076
4930455H04Rik	0	1.6758	3.07419	2.87306	3.02901	3.74171	5.49268	-0.658861	0.239846	0.351498	1.58333	3.78411
4930459C07Rik	0	0	0	0	0	0	0	0	1	NA	0	0
4930463O16Rik	2.54547	1.6758	0	0.957687	0	1.24724	0.915446	0.0929372	0.844157	NA	1.40709	0.780093
4930465K10Rik	0	1.6758	3.07419	0	1.00967	1.24724	0	0.563735	0.301201	0.420106	1.58333	0.564227
4930471G03Rik	0	1.6758	6.14837	8.61918	7.06768	6.23619	0	-0.754095	0.184794	0.286239	2.60806	5.48076
4930471M09Rik	2.54547	3.3516	3.07419	0	0	0	1.83089	0.980523	0.0685397	0.126099	2.99042	0.457723
4930473A02Rik	28.0002	18.4338	24.5935	26.8152	26.2514	19.9558	18.3089	-0.00323358	0.99279	0.996156	23.6758	22.8328
4930474G06Rik	2.54547	0	3.07419	0	0	0	0	0.473121	0.222022	NA	1.87322	0
4930474M22Rik	5.09095	0	4.61128	2.87306	3.02901	0	2.74634	0.229389	0.68753	0.778272	3.23408	2.1621
4930474N09Rik	5.09095	1.6758	1.53709	0.957687	2.01934	0	1.83089	0.320513	0.552894	0.663787	2.76795	1.20198
4930478L05Rik	38.1821	15.0822	23.0564	12.4499	18.174	7.48342	14.6471	0.736425	0.0889727	0.156864	25.4402	13.1886
4930479D17Rik	7.63642	6.7032	4.61128	1.91537	2.01934	0	3.66178	1.00424	0.0786384	0.141468	6.31697	1.89912
4930480G23Rik	0	1.6758	0	0.957687	1.00967	3.74171	4.57723	-0.555867	0.324722	0.44556	0.5586	2.57157
4930480K15Rik	0	0	1.53709	2.87306	2.01934	0	0.915446	-0.308234	0.479175	NA	0.512365	1.45196
4930480K23Rik	56.0004	68.7078	50.7241	42.1382	39.3771	32.4282	32.9561	0.657049	0.0022255	0.00646247	58.4774	36.7249
4930481A15Rik	145.092	50.274	43.0386	47.8844	45.4351	33.6754	81.4747	0.50926	0.14776	0.238123	79.4682	52.1174
4930482G09Rik	0	0	1.53709	3.83075	2.01934	1.24724	0.915446	-0.381814	0.280436	NA	0.512365	2.00319
4930483J18Rik	5.09095	0	1.53709	0	0	0	0	0.460688	0.232101	NA	2.20935	0
4930483K19Rik	0	1.6758	4.61128	3.83075	6.05801	3.74171	9.15446	-0.935002	0.093271	0.163452	2.09569	5.69623
4930483O08Rik	7.63642	0	1.53709	1.91537	0	0	4.57723	0.282989	0.620814	0.723461	3.05784	1.62315
4930486F22Rik	0	0	0	0	1.00967	0	0	0.0665387	0.889585	NA	0	0.252417
4930486L24Rik	10.1819	0	4.61128	7.6615	9.08702	13.7196	10.9854	-0.81646	0.08947	0.157584	4.93106	10.3634
4930487D11Rik	0	0	0	0	1.00967	0	1.83089	-0.24224	0.632826	0.733319	0	0.71014
4930487H11Rik	25.4547	8.379	12.2967	7.6615	8.07735	21.203	10.9854	0.174507	0.720686	0.804768	15.3768	11.9818
4930488L21Rik	2.54547	11.7306	0	1.91537	1.00967	1.24724	0.915446	0.97112	0.0908059	0.159605	4.75869	1.27193
4930502A04Rik	0	5.0274	1.53709	1.91537	1.00967	0	0	0.579344	0.282569	0.400083	2.18816	0.731261
4930502E09Rik	10.1819	0	3.07419	4.78844	2.01934	2.49447	6.40812	0.0189966	0.973014	0.982594	4.41869	3.92759
4930502E18Rik	0	0	0	0	0	0	0	0	1	NA	0	0
4930503B20Rik	2.54547	1.6758	3.07419	0	1.00967	2.49447	0	0.634064	0.262339	0.377528	2.43182	0.876036
4930503F20Rik	0	0	0	0	0	0	0	0	1	NA	0	0
4930503L19Rik	160.365	130.712	104.522	74.6996	78.7542	73.587	93.3755	0.686491	2.45411e-05	0.000111064	131.867	80.1041
4930505A04Rik	2.54547	0	7.68547	0.957687	0	1.24724	0	1.06234	0.0589187	0.111179	3.41031	0.551231
4930506A18Rik	5.09095	3.3516	4.61128	3.83075	1.00967	1.24724	0.915446	0.758801	0.179816	0.279843	4.35128	1.75078
4930506C21Rik	22.9093	13.4064	43.0386	31.6037	28.2707	27.4392	26.5479	-0.111113	0.771699	0.843068	26.4514	28.4654
4930507D05Rik	10.1819	8.379	9.22256	8.61918	4.03868	6.23619	6.40812	0.427845	0.347876	0.46953	9.26115	6.32554
4930509E16Rik	0	0	0	0.957687	1.00967	2.49447	1.83089	-0.686897	0.212725	0.31998	0	1.57318
4930511A08Rik	38.1821	6.7032	29.2048	17.2384	23.2224	12.4724	10.9854	0.419586	0.397046	0.51832	24.6967	15.9796
4930511E03Rik	0	1.6758	0	0	1.00967	0	0	0.469996	0.40336	0.524608	0.5586	0.252417
4930511M06Rik	7.63642	1.6758	4.61128	5.74612	5.04834	7.48342	11.9008	-0.660158	0.223016	0.332222	4.64117	7.54467
4930512B01Rik	66.1823	36.8676	29.2048	34.4767	19.1837	28.6865	37.5333	0.452823	0.197153	0.301357	44.0849	29.97
4930512J16Rik	10.1819	6.7032	7.68547	1.91537	0	3.74171	6.40812	1.00783	0.0520993	0.100422	8.19019	3.0163
4930513N10Rik	10.1819	13.4064	12.2967	9.57687	12.116	16.2141	10.9854	-0.00069371	0.998612	1	11.9617	12.2231
4930515G01Rik	15.2728	5.0274	9.22256	15.323	13.1257	6.23619	14.6471	-0.334376	0.412253	0.533154	9.84094	12.333
4930517E11Rik	0	1.6758	1.53709	0	1.00967	0	0.915446	0.12459	0.732329	NA	1.07096	0.481279
4930520O04Rik	71.2733	43.5708	55.3354	14.3653	16.1547	14.9668	27.4634	1.48688	7.2058e-06	3.62413e-05	56.7265	18.2376
4930521E06Rik	25.4547	5.0274	10.7597	10.5346	22.2127	4.98895	10.0699	0.0402104	0.936095	0.957286	13.7473	11.9515
4930523C07Rik	259.638	227.909	170.617	147.484	147.412	114.746	128.162	0.676397	0.000177406	0.000666315	219.388	134.451
4930525D18Rik	0	5.0274	1.53709	0	0	2.49447	1.83089	0.518867	0.361225	0.482629	2.18816	1.08134
4930525G20Rik	48.364	13.4064	26.1306	54.5882	40.3868	31.1809	24.717	-0.413827	0.175297	0.273842	29.3003	37.7182
4930526I15Rik	17.8183	21.7854	15.3709	7.6615	8.07735	17.4613	17.3935	0.458248	0.215634	0.323396	18.3249	12.6484
4930526L06Rik	2.54547	0	0	0.957687	0	0	0	0.201792	0.649528	NA	0.848491	0.239422
4930527F14Rik	0	0	0	0	0	1.24724	0	0.0920216	0.859733	0.904944	0	0.311809
4930528A17Rik	7.63642	5.0274	6.14837	3.83075	3.02901	1.24724	7.32357	0.311157	0.585516	0.692328	6.27073	3.85764
4930528G23Rik	0	0	0	0.957687	1.00967	1.24724	0.915446	-0.214372	0.528327	NA	0	1.03251
4930532I03Rik	0	0	0	0.957687	1.00967	3.74171	0.915446	-0.555513	0.311518	0.431463	0	1.65613
4930533B01Rik	30.5457	11.7306	24.5935	15.323	18.174	16.2141	10.9854	0.378991	0.423325	0.543907	22.2899	15.1741
4930538K18Rik	7.63642	1.6758	6.14837	0	0	3.74171	1.83089	1.01623	0.0781756	0.140778	5.15353	1.39315
4930539E08Rik	17.8183	1.6758	3.07419	4.78844	8.07735	7.48342	146.471	-1.56998	0.00452095	0.0120863	7.52277	41.7051
4930539J05Rik	2.54547	11.7306	15.3709	11.4922	11.1064	6.23619	12.8162	0.0282592	0.94659	0.964628	9.88234	10.4128
4930539M17Rik	0	0	0	0	0	0	0	0	1	NA	0	0
4930544D05Rik	5.09095	1.6758	1.53709	0	1.00967	0	0	0.545585	0.18389	NA	2.76795	0.252417
4930545L23Rik	63.6369	30.1644	41.5015	32.5614	15.145	13.7196	12.8162	1.01739	0.023091	0.0502768	45.1009	18.5606
4930546C10Rik	15.2728	6.7032	3.07419	2.87306	2.01934	2.49447	1.83089	1.09958	0.053898	0.103427	8.35008	2.30444
4930546K05Rik	0	0	0	0	0	0	0.915446	0.0796803	0.869052	NA	0	0.228861
4930547E08Rik	2.54547	0	0	1.91537	0	0	0.915446	0.0058419	0.99135	0.994937	0.848491	0.707705
4930547E14Rik	0	0	3.07419	0.957687	0	2.49447	0	0.0545794	0.89709	NA	1.02473	0.86304
4930548H24Rik	2.54547	1.6758	3.07419	1.91537	0	0	1.83089	0.539111	0.338873	0.460106	2.43182	0.936566
4930549C15Rik	40.7276	46.9224	12.2967	12.4499	15.145	14.9668	20.1398	0.90175	0.0221124	0.0484013	33.3156	15.6754
4930549G23Rik	20.3638	3.3516	4.61128	10.5346	18.174	6.23619	9.15446	-0.290491	0.549766	0.661419	9.44223	11.0248
4930550C14Rik	2.54547	1.6758	7.68547	2.87306	2.01934	2.49447	7.32357	0.182071	0.729289	0.811469	3.96891	3.67761
4930552P12Rik	7.63642	0	3.07419	2.87306	3.02901	4.98895	2.74634	-0.110063	0.846868	0.896409	3.5702	3.40934
4930554I06Rik	2.54547	0	3.07419	0	0	0	2.74634	0.393056	0.456624	0.57602	1.87322	0.686584
4930555G01Rik	0	0	0	2.87306	1.00967	0	0	-0.0740094	0.72281	NA	0	0.970683
4930556M19Rik	58.5459	21.7854	24.5935	36.3921	37.3577	34.9226	49.4341	-0.291304	0.323341	0.444044	34.9749	39.5266
4930556N13Rik	48.364	15.0822	29.2048	56.5035	24.2321	44.9005	41.1951	-0.461686	0.313641	0.43381	30.8837	41.7078
4930557A04Rik	0	0	0	0	0	0	0	0	1	NA	0	0
4930557J02Rik	0	0	1.53709	0	1.00967	0	0	0.0802317	0.787418	NA	0.512365	0.252417
4930557K07Rik	15.2728	15.0822	15.3709	10.5346	10.0967	3.74171	10.9854	0.665517	0.105867	0.181267	15.242	8.83958
4930558J18Rik	2.54547	6.7032	7.68547	3.83075	3.02901	3.74171	0.915446	0.707071	0.195752	0.299498	5.64471	2.87923
4930558K02Rik	2.54547	1.6758	0	0	0	0	0.915446	0.415771	0.370648	NA	1.40709	0.228861
4930562C15Rik	35.6366	23.4612	47.6499	46.9267	25.2417	23.6975	40.2796	0.0280429	0.949956	0.966782	35.5826	34.0364
4930562F07Rik	5.09095	5.0274	6.14837	1.91537	5.04834	2.49447	4.57723	0.425059	0.423644	0.544164	5.42224	3.50886
4930563D23Rik	0	0	6.14837	0.957687	3.02901	1.24724	0	0.298199	0.594604	0.700442	2.04946	1.30848
4930563E18Rik	0	0	0	1.91537	1.00967	2.49447	1.83089	-0.792596	0.146711	0.236726	0	1.8126
4930563E22Rik	15.2728	20.1096	12.2967	7.6615	8.07735	11.2251	15.5626	0.499375	0.217163	0.325085	15.8931	10.6316
4930563F08Rik	101.819	28.4886	43.0386	26.8152	28.2707	19.9558	21.9707	0.960565	0.0346127	0.0712397	57.7821	24.2531
4930563M21Rik	0	6.7032	0	4.78844	2.01934	2.49447	2.74634	-0.188516	0.739166	0.81902	2.2344	3.01215
4930564C03Rik	2.54547	8.379	12.2967	5.74612	2.01934	0	3.66178	0.863156	0.131024	0.215889	7.74041	2.85681
4930565N06Rik	109.455	58.653	89.1514	101.515	79.7638	52.384	110.769	-0.0184501	0.953179	0.969063	85.7533	86.1079
4930570G19Rik	10.1819	11.7306	9.22256	2.87306	4.03868	2.49447	4.57723	1.19264	0.0163143	0.0372054	10.3784	3.49586
4930572O03Rik	0	0	1.53709	0	0	1.24724	1.83089	-0.00277815	0.995883	0.998541	0.512365	0.769532
4930573O16Rik	0	0	3.07419	1.91537	0	0	0	0.0442277	0.844016	NA	1.02473	0.478844
4930577N17Rik	35.6366	26.8128	30.7419	15.323	12.116	7.48342	21.9707	0.963667	0.0123679	0.0293121	31.0638	14.2233
4930578C19Rik	94.1826	77.0868	35.3532	46.9267	32.3094	43.6533	40.2796	0.667274	0.0182999	0.0410482	68.8742	40.7922
4930578M01Rik	15.2728	3.3516	3.07419	2.87306	5.04834	4.98895	2.74634	0.55756	0.275245	0.392128	7.23288	3.91417
4930579F01Rik	0	0	0	0	0	0	0	0	1	NA	0	0
4930579G18Rik	221.456	80.4384	110.671	90.9803	69.6672	73.587	86.9674	0.682403	0.0114588	0.0274029	137.522	80.3004
4930579G24Rik	12.7274	31.8402	39.9644	32.5614	38.3674	77.3287	21.0553	-0.455398	0.213483	0.32082	28.1773	42.3282
4930579H20Rik	5.09095	13.4064	10.7597	13.4076	11.1064	9.9779	6.40812	-0.0147144	0.973402	0.982756	9.75233	10.225
4930579J19Rik	2.54547	3.3516	1.53709	3.83075	1.00967	0	0.915446	0.242141	0.661009	0.756791	2.47806	1.43897
4930579K19Rik	5.09095	5.0274	10.7597	5.74612	7.06768	3.74171	8.23901	0.137487	0.777134	0.846248	6.95933	6.19863
4930579P08Rik	12.7274	0	7.68547	0.957687	1.00967	4.98895	0.915446	1.00896	0.0795003	0.142787	6.80428	1.96794
4930581F22Rik	53.455	35.1918	44.5757	62.2497	56.5415	42.4061	53.0959	-0.279303	0.284413	0.402156	44.4075	53.5733
4930583K01Rik	0	1.6758	0	0.957687	1.00967	0	0.915446	-0.0470286	0.929531	NA	0.5586	0.7207
4930583P06Rik	0	5.0274	0	0.957687	2.01934	1.24724	0	0.249572	0.648727	0.746484	1.6758	1.05607
4930584F24Rik	0	0	0	0	0	0	0	0	1	NA	0	0
4930590J08Rik	5.09095	8.379	6.14837	7.6615	1.00967	9.9779	4.57723	0.0829026	0.88213	0.919795	6.53944	5.80657
4930592A05Rik	2.54547	3.3516	1.53709	2.87306	0	0	0	0.653527	0.232601	0.343303	2.47806	0.718265
4930592I03Rik	86.5461	51.9498	63.0208	36.3921	34.3287	26.192	38.4487	0.858649	0.0156684	0.0359122	67.1723	33.8404
4930593A02Rik	2.54547	0	4.61128	3.83075	3.02901	0	1.83089	-0.0471515	0.934145	0.956338	2.38559	2.17266
4930594C11Rik	132.365	46.9224	84.5402	61.292	44.4254	52.384	68.6584	0.505383	0.190039	0.292571	87.9424	56.69
4930595D18Rik	12.7274	15.0822	24.5935	11.4922	8.07735	7.48342	10.9854	0.656018	0.192509	0.295504	17.4677	9.50959
4930596I21Rik	33.0912	15.0822	27.6677	22.9845	16.1547	22.4503	30.2097	0.0371199	0.934826	0.956704	25.2804	22.9498
4930597A21Rik	2.54547	0	0	0	0	0	0	0.394252	0.393231	NA	0.848491	0
4930599N23Rik	17.8183	8.379	3.07419	6.70381	4.03868	6.23619	3.66178	0.599556	0.214553	0.322074	9.75717	5.16011
4931402G19Rik	12.7274	5.0274	7.68547	0.957687	2.01934	3.74171	5.49268	0.9977	0.0601348	0.113085	8.48008	3.05285
4931403E22Rik	12.7274	13.4064	18.4451	14.3653	13.1257	4.98895	4.57723	0.567278	0.187709	0.289613	14.8596	9.2643
4931403G20Rik	78.9097	41.895	35.3532	48.842	36.3481	19.9558	39.3642	0.431826	0.201499	0.306385	52.0526	36.1275
4931406C07Rik	437.822	609.991	378.125	629.2	456.37	503.884	480.609	-0.109573	0.584412	0.69148	475.313	517.516
4931406H21Rik	297.82	201.096	301.27	193.453	106.015	78.576	216.961	0.764591	0.0414601	0.0829201	266.729	148.751
4931406P16Rik	1153.1	901.58	814.66	940.449	877.402	850.616	970.373	0.0582781	0.540249	0.652689	956.447	909.71
4931408D14Rik	56.0004	78.7626	55.3354	14.3653	17.1644	7.48342	11.9008	2.12796	2.39245e-12	3.24489e-11	63.3661	12.7285
4931414P19Rik	84.0007	62.0046	72.2434	52.6728	53.5124	71.0925	61.3349	0.260539	0.184855	0.286256	72.7496	59.6532
4931423N10Rik	2.54547	1.6758	1.53709	0.957687	2.01934	4.98895	1.83089	-0.362121	0.510841	0.626215	1.91946	2.44922
4931428F04Rik	134.91	60.3288	75.3176	38.3075	42.4061	43.6533	46.6877	0.972898	0.000980191	0.00310922	90.1855	42.7637
4931429I11Rik	5.09095	1.6758	0	0	0	0	0	1.04484	0.0554608	0.105782	2.25558	0
4931429L15Rik	2.54547	0	3.07419	0.957687	0	1.24724	0	0.36682	0.409603	NA	1.87322	0.551231
4931429P17Rik	0	3.3516	1.53709	0	0	0	0	1.12272	0.0512548	0.0991641	1.62956	0
4931430N09Rik	28.0002	33.516	27.6677	17.2384	16.1547	16.2141	26.5479	0.53445	0.190997	0.293692	29.728	19.0388
4931431C16Rik	12.7274	6.7032	7.68547	6.70381	3.02901	4.98895	4.57723	0.643525	0.190526	0.293144	9.03868	4.82475
4931440F15Rik	17.8183	5.0274	9.22256	3.83075	0	2.49447	1.83089	1.57865	0.00444685	0.0119073	10.6894	2.03903
4931440J10Rik	0	3.3516	0	0	1.00967	0	0.915446	0.420859	0.438203	0.559138	1.1172	0.481279
4931440P22Rik	5.09095	5.0274	1.53709	0.957687	1.00967	0	1.83089	0.992857	0.0850485	0.15104	3.88515	0.949562
4932411E22Rik	2.54547	1.6758	1.53709	0	0	0	0	1.02253	0.0525725	0.101163	1.91946	0
4932413F04Rik	5.09095	0	3.07419	0	2.01934	0	1.83089	0.514575	0.354978	0.476723	2.72171	0.962557
4932416H05Rik	53.455	25.137	55.3354	28.7306	19.1837	32.4282	33.8715	0.604151	0.0164346	0.0374426	44.6424	28.5535
4932418E24Rik	28.0002	36.8676	29.2048	63.2073	112.073	67.3508	70.4893	-1.20701	0.00011559	0.000452423	31.3575	78.2802
4932435O22Rik	5.09095	0	4.61128	0	0	3.74171	0.915446	0.766478	0.183408	0.284486	3.23408	1.16429
4932438A13Rik	3601.85	2825.4	2777.53	3075.13	2694.81	2531.89	2810.42	0.136978	0.283639	0.401221	3068.26	2778.06
4932438H23Rik	10.1819	11.7306	6.14837	6.70381	4.03868	2.49447	6.40812	0.614924	0.240059	0.351767	9.35362	4.91127
4932441J04Rik	10.1819	5.0274	3.07419	1.91537	4.03868	4.98895	0.915446	0.608918	0.27406	0.390628	6.09449	2.96461
4933400A11Rik	7.63642	3.3516	7.68547	4.78844	6.05801	3.74171	3.66178	0.289313	0.588144	0.694507	6.2245	4.56249
4933400F21Rik	155.274	56.9772	83.0031	148.441	98.9475	99.779	145.556	-0.33889	0.334547	0.455906	98.4181	123.181
4933401H06Rik	25.4547	1.6758	12.2967	58.4189	25.2417	51.1367	48.5186	-1.78262	9.51119e-05	0.000379891	13.1424	45.829
4933402D24Rik	2.54547	10.0548	6.14837	6.70381	4.03868	0	3.66178	0.582858	0.273051	0.389534	6.24955	3.60107
4933402P03Rik	0	1.6758	0	0.957687	1.00967	0	0	0.0319621	0.928751	NA	0.5586	0.491839
4933404O12Rik	48.364	46.9224	33.8161	25.8576	41.3964	24.9447	24.717	0.505753	0.0712886	0.130346	43.0342	29.2289
4933405D12Rik	5.09095	3.3516	0	1.91537	0	1.24724	1.83089	0.46183	0.419997	0.540688	2.81418	1.24838
4933405L10Rik	2.54547	1.6758	1.53709	0	0	4.98895	0	0.286581	0.608586	0.712221	1.91946	1.24724
4933406C10Rik	10.1819	10.0548	10.7597	10.5346	11.1064	16.2141	10.0699	-0.178401	0.662755	0.758447	10.3321	11.9812
4933406I18Rik	40.7276	30.1644	10.7597	10.5346	6.05801	1.24724	6.40812	1.72557	8.28048e-05	0.000334955	27.2172	6.06198
4933406J10Rik	5.09095	10.0548	18.4451	14.3653	7.06768	9.9779	15.5626	-0.0840363	0.875686	0.915872	11.197	11.7434
4933406M09Rik	2.54547	1.6758	3.07419	0	2.01934	0	4.57723	0.205269	0.719643	0.804214	2.43182	1.64914
4933407E24Rik	2.54547	0	0	0	0	0	0	0.190981	0.579937	NA	0.848491	0
4933407G14Rik	0	1.6758	3.07419	0	0	0	0.915446	0.654767	0.177131	NA	1.58333	0.228861
4933407K13Rik	76.3642	72.0594	81.466	46.9267	42.4061	27.4392	40.2796	0.89668	0.00411551	0.011128	76.6299	39.2629
4933407L21Rik	0	0	1.53709	0.957687	1.00967	0	2.74634	-0.267931	0.560712	NA	0.512365	1.17842
4933408B17Rik	38.1821	26.8128	21.5193	18.1961	12.116	21.203	14.6471	0.663348	0.0818682	0.146298	28.8381	16.5406
4933408J17Rik	0	0	0	2.87306	1.00967	2.49447	0	-0.397171	0.29765	NA	0	1.5943
4933408N05Rik	0	0	0	0.957687	1.00967	0	0	-0.0552251	0.918776	0.944854	0	0.491839
4933411K16Rik	20.3638	15.0822	6.14837	55.5459	39.3771	12.4724	29.2943	-1.17483	0.013248	0.0310665	13.8648	34.1724
4933412E12Rik	28.0002	20.1096	21.5193	47.8844	34.3287	34.9226	32.0406	-0.65695	0.0287042	0.0606611	23.2097	37.2941
4933413G19Rik	0	0	0	0	1.00967	0	0	0.0154681	0.961736	NA	0	0.252417
4933413J09Rik	28.0002	13.4064	27.6677	25.8576	17.1644	14.9668	31.1252	-0.00118588	0.997598	0.999508	23.0248	22.2785
4933416E03Rik	0	0	0	0	0	0	0	0	1	NA	0	0
4933416M06Rik	0	0	1.53709	0	2.01934	1.24724	0	0.072284	0.897646	0.930182	0.512365	0.816644
4933416M07Rik	20.3638	5.0274	13.8338	6.70381	7.06768	1.24724	6.40812	0.866349	0.0989493	0.171473	13.075	5.35671
4933417A18Rik	0	5.0274	0	0	0	0	0.915446	0.870063	0.118616	0.198953	1.6758	0.228861
4933417D19Rik	20.3638	20.1096	16.908	16.2807	5.04834	6.23619	12.8162	0.71215	0.104261	0.179009	19.1271	10.0954
4933417E11Rik	0	1.6758	0	1.91537	1.00967	0	0	-0.0331577	0.947649	NA	0.5586	0.731261
4933417G07Rik	10.1819	6.7032	15.3709	23.9422	10.0967	8.73066	15.5626	-0.422625	0.406122	0.527466	10.752	14.583
4933417O13Rik	2.54547	3.3516	4.61128	1.91537	3.02901	7.48342	1.83089	-0.042042	0.941288	0.96088	3.50279	3.56467
4933421O10Rik	198.547	83.79	112.208	109.176	101.977	111.004	147.387	0.106649	0.631231	0.732141	131.515	117.386
4933422A05Rik	0	3.3516	3.07419	4.78844	1.00967	2.49447	1.83089	-0.164997	0.772277	0.843339	2.14193	2.53087
4933424G05Rik	53.455	62.0046	73.7805	45.969	29.2804	22.4503	38.4487	0.767437	0.0557125	0.106197	63.08	34.0371
4933424G06Rik	2.54547	3.3516	1.53709	0	0	1.24724	0	1.03298	0.0547332	0.104707	2.47806	0.311809
4933427D14Rik	483.64	303.32	307.419	248.999	234.243	226.997	228.861	0.600969	0.000766686	0.00249436	364.793	234.775
4933427E11Rik	5.09095	0	7.68547	0.957687	2.01934	3.74171	0	0.687029	0.232177	0.342877	4.25881	1.67968
4933427G17Rik	5.09095	10.0548	6.14837	4.78844	5.04834	2.49447	2.74634	0.695548	0.164257	0.259474	7.09804	3.7694
4933427I22Rik	5.09095	1.6758	13.8338	2.87306	4.03868	1.24724	4.57723	0.78286	0.144699	0.234013	6.86686	3.18405
4933428G20Rik	5.09095	10.0548	9.22256	5.74612	5.04834	1.24724	3.66178	0.783023	0.128977	0.213189	8.12277	3.92587
4933430I17Rik	7.63642	3.3516	3.07419	3.83075	2.01934	6.23619	0.915446	0.358265	0.499629	0.615873	4.6874	3.25043
4933430M04Rik	0	0	1.53709	0	0	0	0.915446	0.115832	0.740597	NA	0.512365	0.228861
4933431E20Rik	117.092	80.4384	126.042	165.68	114.093	130.96	144.64	-0.353481	0.0518684	0.100106	107.857	138.843
4933431G14Rik	2.54547	6.7032	9.22256	6.70381	9.08702	6.23619	9.15446	-0.225066	0.65451	0.751336	6.15708	7.79537
4933432I03Rik	0	0	1.53709	0.957687	1.00967	1.24724	0	-0.081893	0.84158	NA	0.512365	0.803648
4933432I09Rik	0	3.3516	1.53709	0	0	0	0.915446	0.763166	0.138083	0.225283	1.62956	0.228861
4933433G15Rik	20.3638	10.0548	23.0564	9.57687	13.1257	7.48342	10.9854	0.657489	0.117222	0.196875	17.825	10.2928
4933433G19Rik	28.0002	20.1096	39.9644	26.8152	21.203	19.9558	33.8715	0.182864	0.582801	0.690108	29.3581	25.4614
4933433H22Rik	12.7274	1.6758	6.14837	0.957687	1.00967	2.49447	4.57723	0.955004	0.087872	0.155309	6.85052	2.25977
4933434E20Rik	481.095	373.703	421.164	845.638	816.822	795.737	699.401	-0.903923	9.34678e-24	3.85913e-22	425.321	789.399
4933439C10Rik	142.547	85.4658	83.0031	45.0113	37.3577	46.1478	62.2503	1.04898	1.65245e-06	9.34912e-06	103.672	47.6918
4933439K11Rik	10.1819	15.0822	12.2967	25.8576	14.1354	8.73066	15.5626	-0.316156	0.415115	0.536284	12.5203	16.0715
4933440J02Rik	2.54547	0	3.07419	1.91537	1.00967	0	1.83089	0.249528	0.65823	0.75429	1.87322	1.18898
4933440M02Rik	0	3.3516	0	6.70381	4.03868	3.74171	3.66178	-1.12415	0.045421	0.0896682	1.1172	4.5365
5031414D18Rik	22.9093	31.8402	30.7419	12.4499	12.116	12.4724	20.1398	0.867509	0.0384047	0.0776933	28.4971	14.2945
5031425E22Rik	336.003	298.292	312.03	238.464	229.195	222.008	265.479	0.387462	0.0539681	0.103539	315.442	238.787
5031425F14Rik	2.54547	13.4064	19.9822	3.83075	3.02901	2.49447	9.15446	1.17986	0.010054	0.0244618	11.978	4.62717
5031426D15Rik	150.183	129.037	170.617	96.7264	52.5028	63.6091	72.3202	1.03233	0.000124986	0.000485346	149.946	71.2896
5031434C07Rik	45.8185	35.1918	13.8338	16.2807	9.08702	11.2251	15.5626	0.991205	0.0279281	0.0592538	31.6147	13.0389
5031434O11Rik	22.9093	8.379	16.908	2.87306	2.01934	7.48342	10.9854	1.14991	0.0128717	0.0303404	16.0654	5.84029
5031439G07Rik	1178.55	1109.38	1095.95	1041.01	1022.79	1593.97	1470.21	-0.183097	0.189907	0.292445	1127.96	1281.99
5033403F01Rik	10.1819	6.7032	12.2967	4.78844	2.01934	2.49447	7.32357	0.929178	0.0592559	0.111669	9.72728	4.15645
5033406O09Rik	15.2728	11.7306	9.22256	37.3498	33.3191	43.6533	26.5479	-1.4361	6.12635e-05	0.000254307	12.0753	35.2175
5033428I22Rik	0	1.6758	0	0	0	0	0	0.0680245	0.749582	NA	0.5586	0
5330417C22Rik	150.183	70.3836	46.1128	33.519	46.4448	57.3729	85.1365	0.583284	0.0636035	0.118429	88.8931	55.6183
5330426P16Rik	73.8188	129.037	116.819	61.292	69.6672	47.395	49.4341	0.916898	6.5332e-06	3.31212e-05	106.558	56.9471
5330434G04Rik	0	0	1.53709	0.957687	0	0	0.915446	0.0678862	0.878185	NA	0.512365	0.468283
5330439B14Rik	0	1.6758	4.61128	2.87306	0	0	4.57723	0.0481194	0.931694	0.954213	2.09569	1.86257
5430402O13Rik	7.63642	8.379	12.2967	4.78844	3.02901	3.74171	4.57723	1.01037	0.0318849	0.0664497	9.43739	4.0341
5430403N17Rik	2.54547	1.6758	3.07419	0.957687	1.00967	0	2.74634	0.475623	0.407609	0.528959	2.43182	1.17842
5430405H02Rik	28.0002	11.7306	19.9822	16.2807	23.2224	17.4613	19.2244	-0.000950473	0.997791	0.999537	19.9043	19.0472
5430416N02Rik	89.0916	75.411	78.3918	45.0113	64.6188	39.9116	61.3349	0.579357	0.00659077	0.0168703	80.9648	52.7191
5430416O09Rik	320.73	105.575	155.246	117.796	117.122	120.982	154.71	0.547961	0.0445356	0.0881673	193.851	127.652
5430419D17Rik	40.7276	1.6758	3.07419	1.91537	1.00967	0	0.915446	1.63248	0.00324423	0.00902084	15.1592	0.960122
5430421F17Rik	0	11.7306	3.07419	0	1.00967	1.24724	0.915446	1.31544	0.0227455	0.0496526	4.93493	0.793088
5430421N21Rik	0	0	0	0	0	0	0	0	1	NA	0	0
5430425K12Rik	2.54547	5.0274	1.53709	1.91537	0	0	0.915446	1.04899	0.0666932	0.123187	3.03666	0.707705
5430427M07Rik	0	0	3.07419	0.957687	1.00967	2.49447	0	0.136432	0.809797	0.869854	1.02473	1.11546
5430427O19Rik	17.8183	21.7854	38.4273	18.1961	9.08702	8.73066	10.0699	1.02926	0.0152525	0.0351201	26.0104	11.5209
5430428K19Rik	12.7274	6.7032	23.0564	7.6615	3.02901	2.49447	5.49268	1.14808	0.031775	0.066275	14.1623	4.66941
5430431A17Rik	33.0912	11.7306	10.7597	15.323	13.1257	8.73066	20.1398	0.197108	0.663665	0.759097	18.5271	14.3298
5430437J10Rik	53.455	15.0822	26.1306	7.6615	2.01934	8.73066	10.9854	1.6986	0.000148246	0.000566133	31.5559	7.34921
5430440P10Rik	0	0	0	0	0	0	0	0	1	NA	0	0
5530401A14Rik	0	0	0	0	0	0	0	0	1	NA	0	0
5530601H04Rik	185.82	117.306	118.356	113.007	79.7638	84.8121	99.7836	0.535183	0.00222735	0.00646564	140.494	94.3417
5730405O15Rik	15.2728	11.7306	16.908	8.61918	14.1354	6.23619	17.3935	0.29232	0.448963	0.569634	14.6372	11.5961
5730408K05Rik	58.5459	20.1096	44.5757	24.8999	33.3191	32.4282	34.7869	0.300592	0.482738	0.600303	41.0771	31.3585
5730409E04Rik	196.002	211.151	218.267	453.944	367.519	415.33	345.123	-0.904936	1.77697e-10	1.86898e-09	208.473	395.479
5730416F02Rik	0	0	6.14837	0	3.02901	0	2.74634	0.112905	0.818362	0.876145	2.04946	1.44384
5730420D15Rik	10.1819	18.4338	7.68547	6.70381	7.06768	6.23619	3.66178	0.785041	0.107103	0.183013	12.1004	5.91737
5730422E09Rik	15.2728	13.4064	6.14837	2.87306	6.05801	3.74171	0.915446	1.28818	0.0123724	0.0293153	11.6092	3.39706
5730435O14Rik	0	1.6758	0	0.957687	1.00967	2.49447	1.83089	-0.441257	0.384159	NA	0.5586	1.57318
5730455P16Rik	338.548	288.238	307.419	195.368	192.847	235.728	181.258	0.622178	5.55334e-06	2.86111e-05	311.401	201.3
5730460C07Rik	0	1.6758	3.07419	0	0	0	0	0.947279	0.0651801	NA	1.58333	0
5730480H06Rik	71.2733	33.516	33.8161	22.9845	32.3094	19.9558	30.2097	0.662791	0.0717254	0.131019	46.2018	26.3649
5730488B01Rik	0	0	0	0	0	0	0	0	1	NA	0	0
5730507C01Rik	5.09095	33.516	12.2967	6.70381	9.08702	7.48342	4.57723	1.05138	0.0234819	0.0510154	16.9679	6.96287
5730508B09Rik	45.8185	56.9772	69.1692	64.165	75.7252	67.3508	71.4048	-0.233152	0.322208	0.442659	57.3217	69.6614
5730522E02Rik	2.54547	5.0274	1.53709	0.957687	2.01934	3.74171	1.83089	0.316306	0.580051	0.687924	3.03666	2.13741
5730559C18Rik	48.364	110.603	87.6143	64.165	73.7058	96.0373	37.5333	0.239491	0.462633	0.582029	82.1937	67.8604
5830411N06Rik	2.54547	5.0274	4.61128	0	0	2.49447	0.915446	1.06818	0.0640055	0.119032	4.06139	0.85248
5830415F09Rik	94.1826	83.79	84.5402	94.811	93.8992	123.477	88.7983	-0.198908	0.286743	0.404516	87.5042	100.246
5830416I19Rik	0	0	0	0	0	0	0	0	1	NA	0	0
5830416P10Rik	20.3638	8.379	9.22256	2.87306	6.05801	9.9779	10.9854	0.544393	0.258713	0.373491	12.6551	7.47358
5830417I10Rik	341.094	231.26	232.101	202.072	198.905	228.244	223.369	0.303982	0.0578726	0.109492	268.152	213.147
5830418P13Rik	5.09095	0	6.14837	0.957687	0	0	0	1.26431	0.0207452	0.0457441	3.74644	0.239422
5830428M24Rik	20.3638	8.379	10.7597	12.4499	13.1257	13.7196	14.6471	-0.106248	0.820697	0.878014	13.1675	13.4856
5830432E09Rik	25.4547	26.8128	18.4451	26.8152	15.145	16.2141	24.717	0.146221	0.683158	0.774507	23.5709	20.7228
5830444B04Rik	15.2728	3.3516	7.68547	13.4076	11.1064	11.2251	8.23901	-0.287252	0.548751	0.660466	8.76997	10.9945
5830454E08Rik	12.7274	10.0548	10.7597	3.83075	4.03868	3.74171	5.49268	1.04642	0.031415	0.0656244	11.1806	4.27595
5830473C10Rik	0	0	0	0	0	0	0	0	1	NA	0	0
5930403L14Rik	106.91	108.927	49.187	23.9422	12.116	11.2251	10.9854	2.26765	5.01092e-10	4.95344e-09	88.3413	14.5672
5930412G12Rik	17.8183	67.032	26.1306	6.70381	6.05801	3.74171	9.15446	2.15508	9.06468e-08	6.36064e-07	36.9936	6.4145
5930430L01Rik	249.456	118.982	204.433	41.1805	38.3674	28.6865	64.0812	1.99175	1.04828e-10	1.1376e-09	190.957	43.0789
5930438M14Rik	0	0	0	0	0	0	0	0	1	NA	0	0
6030407O03Rik	2.54547	1.6758	0	0.957687	0	2.49447	0.915446	0.221509	0.697202	0.786512	1.40709	1.0919
6030408B16Rik	2.54547	1.6758	0	2.87306	1.00967	3.74171	3.66178	-0.663694	0.238715	0.350232	1.40709	2.82156
6030419C18Rik	15.2728	107.251	29.2048	19.1537	27.2611	19.9558	42.1105	0.75107	0.0268702	0.0573105	50.5763	27.1203
6030440G07Rik	0	0	0	0.957687	0	0	0	0.107686	0.834191	0.888329	0	0.239422
6030443J06Rik	63.6369	41.895	50.7241	46.9267	42.4061	29.9337	43.9414	0.297589	0.33389	0.455275	52.0853	40.802
6030458C11Rik	414.912	346.891	351.994	475.013	474.544	482.681	418.359	-0.323127	0.00374586	0.010244	371.266	462.649
6030466F02Rik	0	0	0	0.957687	0	0	3.66178	-0.359324	0.479644	0.597388	0	1.15487
6030468B19Rik	2.54547	1.6758	3.07419	2.87306	2.01934	2.49447	3.66178	-0.277391	0.62604	0.727974	2.43182	2.76216
6030469F06Rik	0	1.6758	0	0.957687	0	0	0.915446	0.141681	0.784395	NA	0.5586	0.468283
6230400D17Rik	20.3638	11.7306	10.7597	7.6615	11.1064	4.98895	10.9854	0.532478	0.235401	0.346598	14.2847	8.68554
6330403A02Rik	50.9095	13.4064	27.6677	10.5346	9.08702	7.48342	33.8715	0.844357	0.0339872	0.0702127	30.6612	15.2441
6330403K07Rik	5.09095	23.4612	23.0564	15.323	15.145	17.4613	12.8162	0.193081	0.681126	0.772951	17.2029	15.1864
6330407A03Rik	76.3642	30.1644	49.187	30.646	28.2707	28.6865	29.2943	0.686035	0.0749535	0.135774	51.9052	29.2244
6330408A02Rik	81.4552	48.5982	59.9467	48.842	51.4931	68.5981	52.1804	0.163443	0.481801	0.59939	63.3333	55.2784
6330409D20Rik	30.5457	18.4338	21.5193	14.3653	16.1547	6.23619	18.3089	0.602762	0.163027	0.257961	23.4996	13.7663
6330410L21Rik	2.54547	0	1.53709	5.74612	2.01934	4.98895	5.49268	-0.746586	0.0911541	0.160138	1.36086	4.56177
6330415G19Rik	15.2728	8.379	7.68547	10.5346	7.06768	3.74171	6.40812	0.412958	0.343479	0.465009	10.4458	6.93802
6330416G13Rik	180.729	154.174	216.73	307.418	345.307	511.367	281.042	-0.943291	8.26877e-08	5.8348e-07	183.877	361.283
6330418K02Rik	2.54547	6.7032	6.14837	5.74612	3.02901	2.49447	1.83089	0.49031	0.36148	0.482825	5.13235	3.27512
6330549D23Rik	45.8185	53.6256	50.7241	28.7306	38.3674	16.2141	39.3642	0.667149	0.0174737	0.0394943	50.0561	30.6691
6430531B16Rik	12.7274	3.3516	4.61128	4.78844	3.02901	6.23619	9.15446	0.0677971	0.894535	0.928349	6.89675	5.80202
6430548M08Rik	173.092	122.333	178.303	1073.57	961.205	1036.45	743.342	-2.53928	1.56438e-35	1.56034e-33	157.91	953.642
6430550D23Rik	38.1821	20.1096	15.3709	20.1114	22.2127	19.9558	15.5626	0.227733	0.494645	0.611172	24.5542	19.4606
6430562O15Rik	15.2728	13.4064	23.0564	6.70381	13.1257	11.2251	19.2244	0.423735	0.248157	0.361071	17.2452	12.5698
6430571L13Rik	15.2728	20.1096	30.7419	6.70381	16.1547	12.4724	15.5626	0.665063	0.13269	0.218189	22.0414	12.7234
6430573F11Rik	48.364	30.1644	41.5015	38.3075	34.3287	58.6202	19.2244	0.0876507	0.765415	0.838631	40.01	37.6202
6430584L05Rik	0	1.6758	0	0	2.01934	2.49447	1.83089	-0.362935	0.519094	0.633664	0.5586	1.58618
6430710C18Rik	0	0	1.53709	0	0	1.24724	0	0.0638511	0.818333	NA	0.512365	0.311809
6530402F18Rik	101.819	78.7626	96.8369	62.2497	51.4931	33.6754	58.5885	0.804356	0.00125049	0.00386377	92.4728	51.5017
6530403H02Rik	0	0	0	0	0	0	0	0	1	NA	0	0
6720468P15Rik	0	0	1.53709	1.91537	0	0	1.83089	-0.172241	0.736578	NA	0.512365	0.936566
6720483E21Rik	5.09095	1.6758	0	0.957687	0	1.24724	0	0.596428	0.259985	0.374869	2.25558	0.551231
6720489N17Rik	17.8183	40.2192	35.3532	20.1114	18.174	26.192	6.40812	0.794829	0.0207307	0.0457208	31.1302	17.7214
6820408C15Rik	0	16.758	1.53709	9.57687	5.04834	8.73066	3.66178	-0.139392	0.798052	0.86189	6.09836	6.75442
6820431F20Rik	81.4552	56.9772	66.095	58.4189	49.4738	44.9005	60.4194	0.310091	0.300636	0.419483	68.1758	53.3032
7420701I03Rik	0	0	0	0	0	0	0.915446	0.0149572	0.958924	NA	0	0.228861
8030423F21Rik	0	0	0	0	1.00967	0	0	0.0126015	0.96396	NA	0	0.252417
8030442B05Rik	0	1.6758	0	0	1.00967	0	0.915446	0.0217398	0.947432	NA	0.5586	0.481279
8030451O07Rik	0	0	4.61128	0.957687	2.01934	0	0.915446	0.423937	0.459638	0.57904	1.53709	0.973118
8030462N17Rik	369.094	358.621	288.974	370.625	352.374	341.743	362.517	-0.0818769	0.463255	0.582522	338.896	356.815
8430408G22Rik	109.455	60.3288	76.8547	138.865	143.373	134.702	186.751	-0.840448	0.00455175	0.0121613	82.213	150.923
8430419L09Rik	437.822	315.05	510.315	867.664	809.754	1152.45	652.713	-1.03073	2.79294e-12	3.7622e-11	421.062	870.645
8430423G03Rik	7.63642	1.6758	6.14837	2.87306	0	0	2.74634	0.915803	0.1122	0.190038	5.15353	1.40485
8430426J06Rik	56.0004	142.443	46.1128	155.145	87.8412	24.9447	50.3495	0.0680877	0.87538	0.915822	81.5187	79.5702
8430429K09Rik	33.0912	43.5708	47.6499	26.8152	18.174	14.9668	29.2943	0.862685	0.00212276	0.0061986	41.4373	22.3126
8430430B14Rik	0	3.3516	0	0	1.00967	1.24724	1.83089	0.231449	0.685534	0.776734	1.1172	1.02195
8430431K14Rik	119.637	45.2466	116.819	66.0804	52.5028	24.9447	40.2796	0.829998	0.0616798	0.115525	93.901	45.9519
8430436N08Rik	5.09095	0	4.61128	0.957687	2.01934	0	0	0.916149	0.110472	0.187722	3.23408	0.744256
9030025P20Rik	33.0912	23.4612	27.6677	12.4499	14.1354	7.48342	19.2244	0.952119	0.00272585	0.00773944	28.0734	13.3233
9030404E10Rik	0	0	0	1.91537	0	1.24724	3.66178	-0.740904	0.174041	0.272168	0	1.7061
9030612E09Rik	0	3.3516	1.53709	1.91537	3.02901	1.24724	0.915446	0.112031	0.843231	0.894422	1.62956	1.77677
9030617O03Rik	137.456	177.635	118.356	124.499	84.8122	79.8232	97.9527	0.558649	0.00476204	0.0126489	144.482	96.7719
9030619P08Rik	0	0	0	0	1.00967	0	0	0.111207	0.829972	0.885536	0	0.252417
9030624G23Rik	17.8183	35.1918	18.4451	4.78844	11.1064	2.49447	12.8162	1.33203	0.00230552	0.00666756	23.8184	7.80138
9030624J02Rik	707.642	584.854	605.615	620.581	658.304	638.586	733.272	-0.0807254	0.397278	0.518433	632.704	662.686
9130008F23Rik	155.274	118.982	127.579	49.7997	70.6768	54.8784	69.5739	1.08712	1.45991e-07	9.92696e-07	133.945	61.2322
9130011E15Rik	272.366	172.607	175.229	183.876	203.953	205.794	207.806	0.0128519	0.933366	0.955651	206.734	200.357
9130015A21Rik	2.54547	0	0	0	0	0	0.915446	0.209519	0.640402	NA	0.848491	0.228861
9130019O22Rik	63.6369	65.3562	63.0208	36.3921	47.4544	37.4171	64.9967	0.425409	0.0510569	0.0988188	64.0046	46.5651
9130019P16Rik	17.8183	11.7306	13.8338	14.3653	8.07735	12.4724	11.9008	0.18048	0.678793	0.771373	14.4609	11.704
9130023H24Rik	91.6371	124.009	112.208	114.922	116.112	142.185	130.909	-0.175889	0.34935	0.470982	109.285	126.032
9130024F11Rik	5.09095	1.6758	3.07419	0.957687	0	3.74171	1.83089	0.387303	0.493282	0.609997	3.28031	1.63257
9130221H12Rik	28.0002	43.5708	41.5015	49.7997	44.4254	34.9226	54.0113	-0.223531	0.333385	0.454846	37.6908	45.7898
9130230L23Rik	53.455	6.7032	46.1128	50.7574	46.4448	36.1699	17.3935	-0.142988	0.724869	0.808071	35.4237	37.6914
9130401M01Rik	142.547	221.206	187.525	95.7687	129.238	127.218	146.471	0.563237	9.25538e-05	0.000371261	183.759	124.674
9130409J20Rik	0	3.3516	0	0.957687	0	0	0	0.551515	0.288705	0.40667	1.1172	0.239422
9230102K24Rik	0	0	0	1.91537	1.00967	0	1.83089	-0.5164	0.332369	0.453763	0	1.18898
9230102O04Rik	71.2733	28.4886	36.8902	22.9845	20.1934	14.9668	20.1398	1.05196	0.00143918	0.00437498	45.5507	19.5711
9230104L09Rik	0	0	1.53709	1.91537	2.01934	0	0	-0.15332	0.775772	0.845504	0.512365	0.983678
9230105E05Rik	0	0	0	0	0	0	0	0	1	NA	0	0
9230110C19Rik	22.9093	43.5708	33.8161	23.9422	21.203	14.9668	28.3788	0.599583	0.0514025	0.0994048	33.432	22.1227
9230112D13Rik	0	0	1.53709	3.83075	4.03868	2.49447	0	-0.886202	0.0997797	0.172576	0.512365	2.59097
9230112J17Rik	5.09095	1.6758	3.07419	0.957687	2.01934	0	0.915446	0.763989	0.182589	0.283513	3.28031	0.973118
9230114K14Rik	35.6366	30.1644	23.0564	56.5035	38.3674	54.8784	28.3788	-0.565398	0.0396038	0.0798282	29.6191	44.5321
9230116L04Rik	2.54547	8.379	6.14837	22.9845	8.07735	8.73066	4.57723	-0.729528	0.130377	0.215041	5.69095	11.0924
9230116N13Rik	17.8183	5.0274	10.7597	3.83075	2.01934	6.23619	4.57723	1.10153	0.0155588	0.0356933	11.2018	4.16588
9230117E06Rik	2.54547	0	1.53709	0	0	2.49447	0	0.294951	0.564083	0.674033	1.36086	0.623619
9330020H09Rik	45.8185	18.4338	38.4273	43.0959	46.4448	36.1699	52.1804	-0.4178	0.146413	0.236332	34.2266	44.4727
9330102E08Rik	40.7276	36.8676	30.7419	16.2807	10.0967	8.73066	12.8162	1.43597	4.12978e-06	2.1802e-05	36.1124	11.9811
9330111N05Rik	10.1819	1.6758	4.61128	1.91537	0	0	0.915446	1.43107	0.0131523	0.030887	5.48966	0.707705
9330117O12Rik	0	0	1.53709	0	0	0	0	0.592758	0.258573	0.373353	0.512365	0
9330133O14Rik	43.2731	41.895	26.1306	37.3498	52.5028	47.395	67.743	-0.457997	0.0920527	0.16154	37.0996	51.2476
9330136K24Rik	20.3638	25.137	29.2048	18.1961	12.116	11.2251	22.8861	0.617587	0.0503245	0.097678	24.9019	16.1058
9330151L19Rik	96.728	63.6804	78.3918	78.5303	68.6575	57.3729	101.614	0.0364618	0.86045	0.905485	79.6001	76.5438
9330159F19Rik	86.5461	68.7078	29.2048	34.4767	11.1064	7.48342	16.478	1.48543	0.0005789	0.00193921	61.4862	17.3861
9330159M07Rik	48.364	38.5434	35.3532	22.9845	23.2224	16.2141	15.5626	0.962735	0.00155059	0.00467231	40.7535	19.4959
9330162012Rik	25.4547	20.1096	16.908	6.70381	10.0967	16.2141	14.6471	0.716303	0.0383163	0.0775676	20.8241	11.9154
9330162B11Rik	12.7274	1.6758	7.68547	8.61918	8.07735	7.48342	1.83089	-0.0983213	0.860299	0.905433	7.36288	6.50271
9330175E14Rik	43.2731	10.0548	29.2048	7.6615	6.05801	11.2251	11.9008	1.31547	0.00146366	0.00444127	27.5109	9.21136
9330175M20Rik	0	1.6758	3.07419	2.87306	2.01934	3.74171	1.83089	-0.221929	0.695706	0.785373	1.58333	2.61625
9330179D12Rik	7.63642	6.7032	3.07419	2.87306	2.01934	1.24724	1.83089	0.952202	0.0829455	0.147808	5.8046	1.99263
9330182L06Rik	2.54547	8.379	0	0.957687	4.03868	2.49447	2.74634	0.331379	0.554452	0.665163	3.64149	2.55929
9330188P03Rik	15.2728	23.4612	9.22256	6.70381	10.0967	13.7196	19.2244	0.326718	0.435398	0.556319	15.9855	12.4361
9430015G10Rik	320.73	209.475	242.861	113.965	142.363	184.591	136.401	0.804049	2.44391e-05	0.000110659	257.689	144.33
9430016H08Rik	58.5459	93.8448	118.356	142.695	131.257	109.757	140.979	-0.474222	0.00444729	0.0119073	90.249	131.172
9430018G01Rik	30.5457	20.1096	26.1306	20.1114	6.05801	14.9668	8.23901	0.835582	0.0676073	0.124642	25.5953	12.3438
9430020K01Rik	791.643	735.676	711.674	671.339	717.875	606.157	629.827	0.180758	0.195888	0.29968	746.331	656.299
9430037G07Rik	63.6369	30.1644	41.5015	20.1114	20.1934	18.7086	11.9008	1.1795	0.000738023	0.00241039	45.1009	17.7285
9430038I01Rik	56.0004	40.2192	44.5757	73.7419	66.6381	83.5649	64.0812	-0.621135	0.00359042	0.00986603	46.9318	72.0065
9430041J12Rik	5.09095	5.0274	3.07419	8.61918	3.02901	9.9779	0.915446	-0.329097	0.562898	0.672976	4.39751	5.63538
9430060I03Rik	5.09095	6.7032	4.61128	2.87306	2.01934	2.49447	2.74634	0.82191	0.111047	0.188483	5.46848	2.5333
9430065F17Rik	2.54547	3.3516	6.14837	5.74612	6.05801	6.23619	4.57723	-0.266403	0.599997	0.705174	4.01515	5.65439
9430069I07Rik	5.09095	6.7032	3.07419	4.78844	1.00967	1.24724	0.915446	0.673726	0.242053	0.354192	4.95611	1.9902
9430076C15Rik	30.5457	67.032	33.8161	17.2384	27.2611	16.2141	31.1252	0.823586	0.0283832	0.060083	43.7979	22.9597
9430078K24Rik	15.2728	8.379	4.61128	1.91537	3.02901	0	6.40812	1.19941	0.0152927	0.0351921	9.42104	2.83813
9430083A17Rik	38.1821	25.137	32.279	40.2229	32.3094	28.6865	46.6877	-0.232479	0.456772	0.576125	31.866	36.9766
9430091E24Rik	137.456	62.0046	101.448	104.388	73.7058	61.1146	104.361	0.186453	0.392258	0.513316	100.303	85.8923
9530014B07Rik	38.1821	97.1964	15.3709	5.74612	12.116	1.24724	1.83089	2.27858	7.02204e-06	3.53772e-05	50.2498	5.23507
9530020I12Rik	5.09095	1.6758	1.53709	0.957687	0	0	0	0.92678	0.0704709	0.129183	2.76795	0.239422
9530026P05Rik	129.819	38.5434	63.0208	14.3653	12.116	13.7196	32.9561	1.76677	3.62526e-06	1.93515e-05	77.1278	18.2892
9530027J09Rik	17.8183	0	9.22256	10.5346	4.03868	8.73066	7.32357	0.0126228	0.980024	0.987558	9.01363	7.65687
9530051G07Rik	10.1819	10.0548	7.68547	5.74612	1.00967	2.49447	1.83089	1.16103	0.034589	0.0712158	9.30739	2.77029
9530052E02Rik	5.09095	6.7032	1.53709	2.87306	1.00967	1.24724	1.83089	0.699593	0.223811	0.333044	4.44375	1.74021
9530053A07Rik	5.09095	8.379	7.68547	6.70381	2.01934	2.49447	7.32357	0.310017	0.575156	0.683764	7.05181	4.6353
9530059O14Rik	7.63642	6.7032	1.53709	2.87306	2.01934	3.74171	3.66178	0.421519	0.45473	0.574447	5.29224	3.07397
9530062K07Rik	12.7274	11.7306	10.7597	5.74612	4.03868	7.48342	11.9008	0.526651	0.259036	0.373744	11.7392	7.29225
9530068E07Rik	880.734	1305.45	1225.06	1135.82	1059.14	1096.32	1235.85	0.0143068	0.908217	0.937921	1137.08	1131.78
9530077C05Rik	66.1823	25.137	33.8161	32.5614	28.2707	14.9668	39.3642	0.406788	0.246889	0.359577	41.7118	28.7908
9530080O11Rik	2.54547	0	3.07419	6.70381	8.07735	2.49447	3.66178	-0.940722	0.0869601	0.154035	1.87322	5.23435
9530082P21Rik	267.275	221.206	198.285	196.326	169.624	188.333	188.582	0.274841	0.0501469	0.0973759	228.922	185.716
9530091C08Rik	432.731	392.137	410.404	171.426	105.006	83.5649	115.346	1.66474	1.70601e-07	1.14555e-06	411.757	118.836
9630013A20Rik	12.7274	1.6758	12.2967	15.323	14.1354	12.4724	16.478	-0.680301	0.138353	0.22562	8.89997	14.6022
9630013K17Rik	10.1819	1.6758	1.53709	9.57687	5.04834	4.98895	4.57723	-0.470183	0.365445	0.486803	4.46493	6.04785
9630028B13Rik	2.54547	10.0548	10.7597	10.5346	6.05801	2.49447	9.15446	0.0432305	0.932785	0.955166	7.78664	7.06038
9630028H03Rik	0	0	0	0	0	0	0	0	1	NA	0	0
9630028I04Rik	7.63642	8.379	0	0.957687	0	1.24724	1.83089	1.31609	0.0206214	0.045508	5.33847	1.00895
9830107B12Rik	0	0	0	0	0	0	0.915446	0.0605011	0.889372	NA	0	0.228861
9830132P13Rik	0	1.6758	1.53709	0	0	0	0	0.643382	0.184366	NA	1.07096	0
9830147E19Rik	246.911	189.365	192.137	160.891	153.47	128.465	139.148	0.49833	0.0164209	0.0374245	209.471	145.494
9830166K06Rik	5.09095	1.6758	3.07419	2.87306	1.00967	3.74171	2.74634	0.149485	0.792928	0.857975	3.28031	2.59269
9930012K11Rik	43.2731	21.7854	15.3709	17.2384	24.2321	21.203	10.0699	0.430632	0.232708	0.343375	26.8098	18.1858
9930014A18Rik	86.5461	77.0868	75.3176	67.9958	79.7638	84.8121	66.8276	0.0850098	0.691071	0.781432	79.6502	74.8498
9930021J03Rik	715.278	648.535	588.707	541.093	528.057	475.197	635.319	0.248952	0.0110953	0.026663	650.84	544.917
9930104L06Rik	201.092	115.63	153.709	140.78	143.373	135.949	131.824	0.147358	0.308782	0.428602	156.811	137.982
9930111J21Rik1	40.7276	38.5434	44.5757	34.4767	21.203	16.2141	28.3788	0.633338	0.0938952	0.164293	41.2822	25.0682
9930111J21Rik2	0	0	7.68547	4.78844	1.00967	1.24724	1.83089	0.241676	0.668667	0.763081	2.56182	2.21906
a	2.54547	0	0	0	0	0	0	0.102946	0.693268	NA	0.848491	0
A130010J15Rik	114.546	83.79	126.042	212.607	159.528	187.086	111.684	-0.61121	0.000590549	0.00197413	108.126	167.726
A130077B15Rik	2.54547	8.379	7.68547	1.91537	3.02901	0	4.57723	0.922232	0.0945992	0.165225	6.20331	2.3804
A1bg	2.54547	1.6758	1.53709	3.83075	1.00967	3.74171	5.49268	-0.560682	0.313028	0.433165	1.91946	3.5187
A230001M10Rik	0	3.3516	1.53709	0	1.00967	1.24724	0	0.544485	0.307745	0.427554	1.62956	0.564227
A230009B12Rik	0	3.3516	3.07419	3.83075	1.00967	0	2.74634	0.0626328	0.912575	0.940435	2.14193	1.89669
A230020J21Rik	5.09095	3.3516	4.61128	1.91537	2.01934	2.49447	2.74634	0.45847	0.423292	0.543904	4.35128	2.29388
A230028O05Rik	0	3.3516	0	1.91537	2.01934	2.49447	1.83089	-0.316838	0.575	0.683623	1.1172	2.06502
A230046K03Rik	1117.46	921.69	971.443	1024.73	922.837	924.203	1070.16	0.0192794	0.795746	0.860483	1003.53	985.48
A230050P20Rik	246.911	134.064	182.914	65.1227	66.6381	53.6312	90.6291	1.38645	1.52504e-09	1.4007e-08	187.963	69.0053
A230056J06Rik	0	0	0	0.957687	1.00967	0	0.915446	-0.235117	0.650225	NA	0	0.7207
A230056P14Rik	35.6366	30.1644	27.6677	15.323	18.174	9.9779	15.5626	0.981637	0.00136662	0.00417894	31.1562	14.7594
A230057D06Rik	7.63642	10.0548	3.07419	3.83075	6.05801	1.24724	0.915446	0.765866	0.158462	0.252068	6.9218	3.01286
A230065H16Rik	5.09095	13.4064	4.61128	3.83075	6.05801	4.98895	10.9854	0.146337	0.772712	0.843607	7.70288	6.46577
A230072C01Rik	66.1823	62.0046	43.0386	38.3075	36.3481	38.6644	32.0406	0.61054	0.012652	0.0298981	57.0752	36.3401
A230072E10Rik	15.2728	6.7032	27.6677	57.4612	38.3674	31.1809	46.6877	-1.26718	0.00122779	0.00379905	16.5479	43.4243
A230103J11Rik	12.7274	18.4338	21.5193	21.0691	17.1644	6.23619	22.8861	0.0456989	0.91619	0.943177	17.5602	16.839
A230108P19Rik	7.63642	0	3.07419	0.957687	1.00967	3.74171	0	0.668959	0.244506	0.356811	3.5702	1.42727
A2m	0	0	0	0	0	1.24724	1.83089	-0.19227	0.663571	NA	0	0.769532
A330009N23Rik	12.7274	13.4064	3.07419	4.78844	7.06768	9.9779	11.9008	0.0848382	0.846871	0.896409	9.73599	8.4337
A330015K06Rik	2.54547	3.3516	0	4.78844	4.03868	3.74171	4.57723	-0.699095	0.203212	0.308467	1.96569	4.28651
A330023F24Rik	572.732	206.123	255.158	88.1072	75.7252	48.6423	124.501	1.89514	6.30572e-12	8.18959e-11	344.671	84.2438
A330032B11Rik	15.2728	3.3516	9.22256	6.70381	8.07735	3.74171	5.49268	0.35381	0.507639	0.623366	9.28234	6.00389
A330033J07Rik	0	10.0548	10.7597	1.91537	2.01934	0	0	1.81528	0.000953599	0.00303354	6.93815	0.983678
A330035P11Rik	17.8183	13.4064	23.0564	40.2229	29.2804	41.1588	32.9561	-0.885897	0.0027002	0.00767891	18.0937	35.9045
A330040F15Rik	5.09095	10.0548	3.07419	13.4076	5.04834	6.23619	4.57723	-0.232089	0.631735	0.732535	6.07331	7.31734
A330041J22Rik	22.9093	5.0274	16.908	21.0691	11.1064	19.9558	11.9008	-0.181853	0.638709	0.738328	14.9482	16.008
A330048O09Rik	0	3.3516	0	0.957687	0	1.24724	0	0.505691	0.374337	0.495894	1.1172	0.551231
A330069E16Rik	10.1819	1.6758	0	4.78844	5.04834	4.98895	3.66178	-0.293394	0.582825	0.690108	3.95257	4.62188
A330074K22Rik	7.63642	1.6758	9.22256	6.70381	2.01934	4.98895	2.74634	0.367621	0.497039	0.613459	6.17826	4.11461
A330076H08Rik	5.09095	8.379	6.14837	5.74612	3.02901	2.49447	2.74634	0.711889	0.154804	0.247158	6.53944	3.50399
A330093E20Rik	0	0	0	0	0	0	0	0	1	NA	0	0
A330102I10Rik	5.09095	3.3516	4.61128	5.74612	6.05801	6.23619	9.15446	-0.523913	0.299328	0.418052	4.35128	6.7987
A3galt2	20.3638	5.0274	7.68547	1.91537	1.00967	3.74171	6.40812	1.17108	0.0285851	0.0604526	11.0256	3.26872
A430005L14Rik	101.819	124.009	146.024	166.638	176.692	207.041	192.244	-0.563799	0.000694579	0.00228101	123.951	185.654
A430033K04Rik	168.001	159.201	205.971	181.961	192.847	180.849	148.302	0.0320299	0.810085	0.869854	177.724	175.99
A430035B10Rik	10.1819	20.1096	18.4451	12.4499	10.0967	3.74171	11.9008	0.73242	0.0507886	0.0983961	16.2455	9.54728
A430046D13Rik	109.455	107.251	64.5579	37.3498	31.2997	38.6644	39.3642	1.2792	1.60626e-08	1.26801e-07	93.7548	36.6695
A430078G23Rik	40.7276	13.4064	26.1306	10.5346	11.1064	6.23619	13.7317	1.01083	0.0411851	0.0824631	26.7549	10.4022
A430078I02Rik	35.6366	16.758	12.2967	15.323	17.1644	12.4724	16.478	0.332	0.358735	0.480243	21.5638	15.3594
A430088P11Rik	53.455	26.8128	43.0386	27.7729	22.2127	36.1699	25.6325	0.463863	0.185498	0.287	41.1021	27.947
A430090L17Rik	104.364	38.5434	49.187	36.3921	32.3094	32.4282	41.1951	0.654063	0.12256	0.204538	64.0316	35.5812
A430093F15Rik	0	0	6.14837	1.91537	0	1.24724	0.915446	0.520204	0.362874	0.484359	2.04946	1.01951
A430105I19Rik	257.093	124.009	221.341	90.0226	88.8509	74.8342	67.743	1.24791	1.27607e-06	7.36041e-06	200.815	80.3627
A4galt	117.092	118.982	102.985	67.0381	82.7928	69.8453	147.387	0.304842	0.163392	0.25836	113.02	91.7658
A530013C23Rik	76.3642	11.7306	27.6677	22.9845	21.203	9.9779	27.4634	0.714034	0.0811422	0.145163	38.5875	20.4072
A530016L24Rik	455.64	854.658	911.497	173.341	127.218	98.5318	109.854	2.33727	8.84998e-15	1.54953e-13	740.598	127.236
A530032D15Rik	7.63642	3.3516	19.9822	1.91537	1.00967	1.24724	2.74634	1.49867	0.00864509	0.0213827	10.3234	1.72965
A530050N04Rik	0	11.7306	0	0	0	0	0.915446	0.192622	0.358881	0.480366	3.9102	0.228861
A530053G22Rik	20.3638	13.4064	6.14837	3.83075	5.04834	0	5.49268	1.40896	0.0014496	0.00440237	13.3062	3.59294
A530064D06Rik	0	0	3.07419	2.87306	2.01934	2.49447	0.915446	-0.411978	0.464206	0.583223	1.02473	2.07558
A530065N20Rik	0	8.379	0	1.91537	1.00967	1.24724	0.915446	0.567362	0.323062	0.443695	2.793	1.27193
A530072M11Rik	7.63642	11.7306	6.14837	3.83075	4.03868	2.49447	7.32357	0.735384	0.130124	0.214725	8.50513	4.42187
A530088E08Rik	0	5.0274	3.07419	0.957687	0	0	1.83089	0.809674	0.151702	0.243232	2.70053	0.697145
A530099J19Rik	5.09095	5.0274	12.2967	7.6615	4.03868	8.73066	10.0699	0.111575	0.820602	0.878014	7.4717	7.62518
A630001G21Rik	106.91	23.4612	99.9111	40.2229	23.2224	28.6865	24.717	1.17991	0.002916	0.00822147	76.7607	29.2122
A630012P03Rik	0	1.6758	1.53709	1.91537	2.01934	2.49447	0.915446	-0.268601	0.635094	0.735372	1.07096	1.83616
A630019I02Rik	2.54547	0	3.07419	0	2.01934	1.24724	0.915446	0.231268	0.666022	0.761107	1.87322	1.04551
A630020A06	2.54547	0	0	2.87306	1.00967	2.49447	0	-0.397148	0.47432	0.592251	0.848491	1.5943
A630023A22Rik	40.7276	0	9.22256	49.7997	37.3577	39.9116	293.858	-2.11303	0.000138493	0.000531978	16.6501	105.232
A630023P12Rik	0	0	1.53709	0	2.01934	0	0	0.0841025	0.852321	0.900774	0.512365	0.504834
A630033H20Rik	12.7274	25.137	46.1128	40.2229	39.3771	42.4061	34.7869	-0.34834	0.305711	0.425227	27.9924	39.1982
A630066F11Rik	5.09095	21.7854	19.9822	24.8999	15.145	18.7086	13.7317	-0.0608055	0.856667	0.903214	15.6195	18.1213
A630072M18Rik	145.092	100.548	79.9289	82.3611	71.6865	73.587	89.7137	0.40537	0.017576	0.0396852	108.523	79.3371
A630075F10Rik	7.63642	10.0548	4.61128	3.83075	3.02901	2.49447	3.66178	0.887568	0.0756652	0.136896	7.43417	3.254
A630076J17Rik	0	1.6758	0	8.61918	10.0967	6.23619	1.83089	-1.61876	0.00308299	0.00862925	0.5586	6.69574
A630077J23Rik	78.9097	16.758	59.9467	29.6883	8.07735	18.7086	47.6032	0.72353	0.122121	0.203945	51.8715	26.0193
A630089N07Rik	180.729	122.333	166.006	160.891	114.093	155.905	97.9527	0.19305	0.526078	0.639901	156.356	132.21
A630095N17Rik	0	0	4.61128	6.70381	8.07735	6.23619	2.74634	-1.04288	0.0653476	0.12113	1.53709	5.94092
A730017C20Rik	2.54547	1.6758	0	0	1.00967	1.24724	0	0.480976	0.391806	0.512875	1.40709	0.564227
A730017L22Rik	86.5461	50.274	52.2612	45.969	46.4448	36.1699	55.8422	0.380758	0.163528	0.258552	63.0271	46.1065
A730020E08Rik	0	5.0274	1.53709	3.83075	0	1.24724	4.57723	0.0542636	0.924054	0.949072	2.18816	2.4138
A730020M07Rik	2.54547	5.0274	6.14837	0.957687	0	0	2.74634	1.26446	0.0273345	0.0581612	4.57375	0.926006
A730036I17Rik	0	0	0	0	0	0	0	0	1	NA	0	0
A730043L09Rik	0	0	0	0	0	0	0	0	1	NA	0	0
A730056A06Rik	2.54547	8.379	9.22256	6.70381	2.01934	3.74171	6.40812	0.467381	0.346014	0.467549	6.71568	4.71825
A730085K08Rik	25.4547	5.0274	16.908	22.9845	17.1644	18.7086	29.2943	-0.582614	0.173906	0.272028	15.7967	22.0379
A730090H04Rik	12.7274	10.0548	21.5193	0.957687	4.03868	1.24724	6.40812	1.69935	0.000643527	0.00212958	14.7672	3.16293
A730090N16Rik	12.7274	1.6758	3.07419	16.2807	17.1644	11.2251	22.8861	-1.31843	0.00861543	0.0213301	5.82579	16.8891
A830009L08Rik	5.09095	6.7032	4.61128	2.87306	4.03868	3.74171	3.66178	0.383984	0.475424	0.593286	5.46848	3.57881
A830010M20Rik	208.729	186.014	135.264	76.615	74.7155	111.004	95.2064	0.948068	1.6753e-07	1.12664e-06	176.669	89.3852
A830018L16Rik	40.7276	45.2466	44.5757	8.61918	6.05801	8.73066	8.23901	2.17583	6.45843e-09	5.41374e-08	43.5166	7.91172
A830052D11Rik	5.09095	5.0274	16.908	3.83075	4.03868	4.98895	5.49268	0.732579	0.159055	0.252808	9.00879	4.58776
A830080D01Rik	330.912	271.48	239.787	117.796	138.325	140.938	145.556	1.02221	4.79082e-11	5.49814e-10	280.726	135.653
A830082K12Rik	20.3638	6.7032	13.8338	5.74612	9.08702	6.23619	10.9854	0.641035	0.103324	0.177598	13.6336	8.01367
A830082N09Rik	56.0004	63.6804	81.466	49.7997	54.5221	32.4282	59.504	0.459938	0.0927645	0.162693	67.0489	49.0635
A930001C03Rik	7.63642	1.6758	9.22256	5.74612	7.06768	4.98895	3.66178	0.0824661	0.877407	0.917186	6.17826	5.36613
A930002C04Rik	0	0	0	0	0	0	1.83089	-0.0602828	0.879124	NA	0	0.457723
A930003O13Rik	2.54547	1.6758	1.53709	0.957687	0	0	1.83089	0.431923	0.418879	0.539679	1.91946	0.697145
A930004D18Rik	25.4547	40.2192	21.5193	21.0691	30.2901	21.203	16.478	0.368769	0.232536	0.343236	29.0644	22.2601
A930005H10Rik	35.6366	25.137	32.279	30.646	20.1934	24.9447	27.4634	0.232212	0.452225	0.572437	31.0175	25.8119
A930006I01Rik	0	0	0	8.61918	11.1064	4.98895	4.57723	-2.14074	7.30582e-05	0.000298934	0	7.32293
A930006K02Rik	15.2728	13.4064	19.9822	9.57687	9.08702	6.23619	12.8162	0.667198	0.108354	0.184777	16.2205	9.42908
A930007I19Rik	25.4547	11.7306	33.8161	12.4499	18.174	11.2251	14.6471	0.644352	0.0996364	0.172395	23.6671	14.1241
A930009A15Rik	2.54547	20.1096	4.61128	3.83075	0	0	1.83089	1.43049	0.013223	0.0310201	9.08879	1.41541
A930012L18Rik	48.364	13.4064	43.0386	15.323	13.1257	18.7086	20.1398	0.801668	0.0742279	0.134753	34.9363	16.8243
A930013F10Rik	137.456	68.7078	121.43	130.245	88.8509	74.8342	76.8975	0.195547	0.575866	0.684378	109.198	92.707
A930015D03Rik	63.6369	23.4612	30.7419	93.8533	85.8219	61.1146	80.5592	-1.08658	1.89616e-05	8.74629e-05	39.28	80.3373
A930016O22Rik	5.09095	0	6.14837	1.91537	2.01934	1.24724	1.83089	0.555663	0.333763	0.455227	3.74644	1.75321
A930017M01Rik	0	3.3516	1.53709	5.74612	2.01934	4.98895	0	-0.461388	0.416648	0.537937	1.62956	3.1886
A930018P22Rik	0	0	0	0	0	0	0	0	1	NA	0	0
A930019D19Rik	53.455	23.4612	26.1306	17.2384	8.07735	6.23619	12.8162	1.31862	0.00252681	0.00724383	34.3489	11.092
A930024E05Rik	33.0912	25.137	35.3532	49.7997	30.2901	38.6644	25.6325	-0.201541	0.499531	0.615836	31.1938	36.0967
A930041C12Rik	5.09095	8.379	10.7597	8.61918	5.04834	4.98895	11.9008	0.0610129	0.902069	0.933893	8.07653	7.63932
AA387883	0	0	1.53709	0	0	0	0	0.111308	0.684192	NA	0.512365	0
AA388235	28.0002	20.1096	29.2048	7.6615	12.116	8.73066	16.478	1.08696	0.00109338	0.00342483	25.7715	11.2466
AA413626	15.2728	8.379	7.68547	5.74612	4.03868	7.48342	5.49268	0.613318	0.216128	0.323945	10.4458	5.69022
AA414768	2.54547	11.7306	9.22256	10.5346	5.04834	3.74171	12.8162	0.0366395	0.939436	0.959376	7.83288	8.03521
AA415398	71.2733	50.274	38.4273	31.6037	21.203	31.1809	45.7723	0.636644	0.0137317	0.0320484	53.3249	32.44
AA465934	10.1819	8.379	15.3709	5.74612	14.1354	27.4392	8.23901	-0.238801	0.616605	0.719218	11.3106	13.8899
AA467197	0	1.6758	1.53709	0	2.01934	1.24724	4.57723	-0.221411	0.696808	0.786209	1.07096	1.96095
AA474331	53.455	23.4612	18.4451	23.9422	28.2707	18.7086	25.6325	0.263503	0.376335	0.49759	31.7871	24.1385
AA536875	0	0	0	0	0	0	0	0	1	NA	0	0
AA543186	17.8183	13.4064	13.8338	10.5346	10.0967	12.4724	14.6471	0.267246	0.489206	0.606224	15.0195	11.9377
AA986860	63.6369	33.516	35.3532	127.372	124.189	203.3	79.6438	-1.56213	7.19515e-10	6.93877e-09	44.1687	133.626
Aaas	216.365	145.795	195.211	149.399	137.315	299.337	95.2064	0.130004	0.634543	0.734925	185.79	170.314
Aacs	875.643	1213.28	1072.89	1541.88	2201.08	1887.07	867.843	-0.59096	0.0207464	0.0457441	1053.94	1624.47
Aadac	5.09095	0	0	0	0	0	0	0.0896656	0.667328	NA	1.69698	0
Aaed1	129.819	204.448	159.858	264.322	202.943	209.536	456.808	-0.726032	0.00264855	0.0075538	164.708	283.402
Aagab	330.912	412.247	385.811	558.332	553.299	597.427	509.903	-0.544408	1.0901e-09	1.02184e-08	376.323	554.74
Aak1	1219.28	1047.38	1146.67	1467.18	1313.58	1335.79	1401.55	-0.277199	0.0738065	0.134093	1137.78	1379.52
Aamdc	134.91	189.365	185.988	183.876	173.663	177.108	200.483	-0.0975403	0.513602	0.628861	170.088	183.782
Aamp	934.189	886.498	957.609	1578.27	1828.51	1712.46	1471.12	-0.831104	1.17696e-16	2.4758e-15	926.099	1647.59
Aanat	15.2728	8.379	7.68547	4.78844	12.116	2.49447	8.23901	0.345534	0.499397	0.615758	10.4458	6.90949
Aar2	239.275	266.452	261.306	361.048	409.926	376.666	352.447	-0.554158	2.05609e-07	1.35955e-06	255.678	375.021
Aard	0	0	3.07419	8.61918	3.02901	2.49447	0.915446	-0.715898	0.201849	0.306784	1.02473	3.76453
Aars	791.643	839.576	965.295	2059.03	2276.8	2514.43	1571.82	-1.26654	2.29541e-54	6.57303e-52	865.504	2105.52
Aars2	165.456	204.448	210.582	132.161	179.721	159.646	142.81	0.323571	0.0278168	0.0590599	193.495	153.584
Aarsd1	226.547	222.881	233.638	383.075	478.583	550.032	280.126	-0.868573	1.0373e-09	9.7595e-09	227.689	422.954
Aasdh	496.367	236.288	287.437	166.638	149.431	154.657	168.442	1.03818	3.59122e-10	3.63504e-09	340.031	159.792
Aasdhppt	259.638	333.484	348.92	462.563	484.641	419.072	356.108	-0.425636	0.00253142	0.00725002	314.014	430.596
Aass	38.1821	30.1644	55.3354	611.962	494.738	662.283	259.071	-3.41922	6.50567e-46	1.20314e-43	41.2273	507.014
Aatf	529.459	348.566	441.146	510.447	407.906	387.891	348.785	0.074474	0.628235	0.729666	439.724	413.757
Aatk	152.728	237.964	133.727	51.7151	68.6575	56.1257	82.3901	1.3596	1.63003e-11	2.00065e-10	174.806	64.7221
AB124611	17.8183	25.137	43.0386	24.8999	20.1934	13.7196	26.5479	0.419688	0.289102	0.4071	28.6646	21.3402
Abat	71.2733	224.557	99.9111	93.8533	118.131	72.3398	57.6731	0.538006	0.0877094	0.155064	131.914	85.4994
Abca1	5668.77	4923.5	4766.53	1896.22	1464.02	1051.42	1509.57	1.77832	8.00618e-44	1.32843e-41	5119.6	1480.31
Abca12	0	10.0548	4.61128	0.957687	2.01934	2.49447	2.74634	0.91159	0.098757	0.17119	4.88869	2.05446
Abca13	2.54547	0	1.53709	0.957687	1.00967	0	1.83089	0.152346	0.78595	0.852867	1.36086	0.949562
Abca14	5.09095	0	0	0	0	0	0.915446	0.282732	0.485509	NA	1.69698	0.228861
Abca17	0	1.6758	0	2.87306	0	2.49447	0.915446	-0.352225	0.520807	0.635099	0.5586	1.57075
Abca2	1229.46	1273.61	1265.03	519.066	625.995	653.552	588.632	1.06905	1.8356e-16	3.83403e-15	1256.03	596.811
Abca3	1496.74	928.393	1083.65	1323.52	1192.42	1620.16	1169.94	-0.166822	0.324819	0.445659	1169.59	1326.51
Abca4	22.9093	3.3516	7.68547	9.57687	15.145	9.9779	21.0553	-0.368107	0.408034	0.529417	11.3154	13.9388
Abca5	239.275	361.973	272.066	232.718	235.253	200.805	216.045	0.413549	0.00336976	0.00932026	291.104	221.205
Abca6	193.456	338.512	313.567	208.776	169.624	204.547	120.839	0.66565	0.0116445	0.0277983	281.845	175.946
Abca7	356.366	273.155	279.751	294.968	376.606	468.961	363.432	-0.295549	0.10543	0.180607	303.091	375.992
Abca8a	1013.1	1486.43	1681.58	1176.04	885.48	975.34	875.166	0.515386	0.0241704	0.0522682	1393.7	978.006
Abca8b	325.821	281.534	301.27	143.653	160.537	159.646	156.541	0.949627	3.36447e-09	2.91949e-08	302.875	155.095
Abca9	554.913	901.58	1045.22	627.285	647.198	547.537	519.973	0.510244	0.0294096	0.0619821	833.906	585.498
Abcb10	267.275	254.722	336.624	462.563	443.245	446.511	312.167	-0.524966	9.96943e-05	0.000396056	286.207	416.121
Abcb11	0	1.6758	0	23.9422	17.1644	31.1809	5.49268	-3.03174	5.70844e-09	4.82378e-08	0.5586	19.445
Abcb1a	267.275	206.123	210.582	143.653	125.199	97.2845	101.614	0.933554	5.75461e-07	3.51937e-06	227.993	116.938
Abcb1b	86.5461	139.091	118.356	62.2497	55.5318	69.8453	52.1804	0.94669	6.29266e-07	3.82079e-06	114.665	59.9518
Abcb4	43.2731	50.274	61.4837	3.83075	1.00967	3.74171	0.915446	2.94217	3.95922e-08	2.92639e-07	51.6769	2.37439
Abcb6	203.638	207.799	187.525	380.202	379.635	517.604	242.593	-0.899942	2.46077e-09	2.1899e-08	199.654	380.008
Abcb7	463.276	549.662	565.65	912.676	830.957	1040.2	579.477	-0.642596	7.02638e-07	4.23013e-06	526.196	840.827
Abcb8	333.457	378.731	336.624	472.14	566.424	576.224	374.417	-0.506536	6.5044e-05	0.000268369	349.604	497.301
Abcb9	81.4552	68.7078	64.5579	203.03	303.91	537.559	135.486	-1.87251	4.85714e-12	6.40191e-11	71.5736	294.996
Abcc1	896.007	804.384	771.621	403.186	382.664	286.865	385.403	1.16366	3.50697e-31	2.46097e-29	824.004	364.53
Abcc10	389.458	189.365	187.525	180.045	221.117	208.289	201.398	0.309185	0.28555	0.40325	255.449	202.712
Abcc12	5.09095	3.3516	0	0	2.01934	1.24724	1.83089	0.473799	0.408555	0.529722	2.81418	1.27437
Abcc2	2.54547	1.6758	6.14837	0	1.00967	1.24724	1.83089	0.931983	0.106052	0.181531	3.45655	1.02195
Abcc3	231.638	286.562	259.769	72.7842	98.9475	64.8563	137.317	1.42906	1.69478e-13	2.62329e-12	259.323	93.4762
Abcc4	183.274	308.347	193.674	145.568	156.499	122.229	129.078	0.707657	8.03232e-05	0.00032618	228.432	138.344
Abcc5	1109.83	814.439	605.615	299.756	325.113	260.673	322.237	1.44067	3.51696e-19	9.68063e-18	843.294	301.945
Abcc6	0	0	0	0.957687	1.00967	1.24724	0.915446	-0.384905	0.488784	0.605824	0	1.03251
Abcc8	89.0916	50.274	26.1306	0.957687	2.01934	0	0	3.87241	4.232e-13	6.23009e-12	55.1654	0.744256
Abcc9	806.915	608.315	590.244	927.041	831.967	840.638	855.026	-0.371515	0.0167274	0.0380156	668.492	863.668
Abcd1	249.456	207.799	222.879	284.433	327.133	396.621	342.377	-0.572821	6.74098e-05	0.000277292	226.711	337.641
Abcd2	1193.83	2165.13	1315.75	543.009	550.27	440.275	543.775	1.52008	2.29829e-12	3.12194e-11	1558.24	519.332
Abcd3	1018.19	1365.78	1154.36	2724.62	2338.39	2568.06	1796.1	-0.957859	9.95974e-13	1.41121e-11	1179.44	2356.79
Abcd4	236.729	164.228	153.709	145.568	162.557	177.108	131.824	0.234799	0.165096	0.260474	184.889	154.264
Abce1	1191.28	1397.62	1414.13	4320.13	3932.66	3986.17	2355.44	-1.39951	8.2784e-26	3.88822e-24	1334.34	3648.6
Abcf1	1069.1	911.635	1034.46	1881.86	1897.17	2040.48	1530.63	-0.867075	9.14445e-22	3.15857e-20	1005.07	1837.53
Abcf2	506.549	643.507	703.989	1163.59	1246.94	1395.66	831.225	-0.883991	2.823e-14	4.7238e-13	618.015	1159.35
Abcf3	778.915	601.612	556.428	1042.92	1107.61	992.801	834.887	-0.617617	1.54474e-05	7.27021e-05	645.652	994.554
Abcg1	366.548	385.434	511.852	244.21	253.427	258.178	225.2	0.740446	0.00410633	0.0111049	421.278	245.254
Abcg2	585.459	355.27	757.787	13104	7938.02	8546.07	3305.68	-3.70009	3.10725e-78	2.29859e-75	566.172	8223.45
Abcg3	38.1821	60.3288	78.3918	55.5459	40.3868	51.1367	74.1511	0.1334	0.700622	0.789317	58.9676	55.3051
Abcg4	20.3638	38.5434	18.4451	15.323	13.1257	8.73066	15.5626	0.825593	0.0277714	0.0589918	25.7841	13.1855
Abcg5	2.54547	0	7.68547	0.957687	2.01934	0	0	1.08181	0.0570058	0.108229	3.41031	0.744256
Abcg8	2.54547	0	3.07419	1.91537	0	0	2.74634	0.242816	0.666455	0.761259	1.87322	1.16543
Abhd1	7.63642	5.0274	9.22256	1.91537	2.01934	1.24724	3.66178	1.08883	0.0507208	0.0983002	7.29546	2.21093
Abhd10	140.001	155.849	116.819	141.738	139.334	189.58	120.839	-0.0942237	0.560171	0.670664	137.557	147.873
Abhd11	338.548	249.694	375.051	468.309	506.854	498.895	459.554	-0.600816	1.78265e-06	1.00282e-05	321.098	483.403
Abhd11os	30.5457	16.758	24.5935	75.6573	72.6962	127.218	132.74	-2.00844	3.32882e-09	2.8925e-08	23.9657	102.078
Abhd12	453.094	491.009	608.689	521.939	482.622	532.57	496.172	0.0316852	0.799888	0.863191	517.598	508.326
Abhd12b	2.54547	1.6758	1.53709	0	0	0	0	0.81071	0.0896825	NA	1.91946	0
Abhd13	491.277	613.343	574.873	1258.4	1140.93	1218.55	965.795	-1.00245	1.71035e-25	7.82618e-24	559.831	1145.92
Abhd14a	106.91	118.982	124.505	180.045	175.682	173.366	114.431	-0.46034	0.0129747	0.0305467	116.799	160.881
Abhd14b	320.73	196.069	307.419	353.387	326.123	326.776	392.726	-0.370537	0.00932842	0.0228721	274.739	349.753
Abhd15	147.638	264.776	167.543	103.43	72.6962	71.0925	82.3901	1.1798	1.54158e-09	1.41252e-08	193.319	82.4023
Abhd16a	379.276	418.95	433.46	339.021	444.254	501.389	417.443	-0.0457004	0.705921	0.793366	410.562	425.527
Abhd16b	2.54547	13.4064	3.07419	6.70381	9.08702	6.23619	9.15446	-0.236323	0.622404	0.725004	6.34202	7.79537
Abhd17a	229.093	239.639	187.525	287.306	452.332	476.445	312.167	-0.774073	1.10178e-05	5.31981e-05	218.753	382.062
Abhd17b	259.638	278.183	347.383	475.013	430.119	483.928	389.98	-0.564247	2.31918e-05	0.000105522	295.068	444.76
Abhd17c	766.188	323.429	745.49	1181.79	1139.92	1080.11	2709.72	-1.31209	2.48281e-05	0.000112219	611.703	1527.88
Abhd2	1845.47	1856.79	1457.16	1140.61	1155.06	1092.58	1142.48	0.588491	0.000284837	0.0010226	1719.81	1132.68
Abhd3	58.5459	58.653	49.187	30.646	27.2611	26.192	27.4634	0.932595	0.000460899	0.00157361	55.462	27.8906
Abhd4	448.003	601.612	507.241	562.162	508.873	527.581	661.867	-0.117466	0.415165	0.536294	518.952	565.121
Abhd5	733.097	713.891	590.244	4866.97	3919.53	5323.21	4785.04	-2.69093	3.94533e-36	4.04886e-34	679.077	4723.69
Abhd6	94.1826	139.091	116.819	85.2341	52.5028	44.9005	70.4893	0.869834	4.05877e-05	0.000175029	116.698	63.2817
Abhd8	43.2731	65.3562	110.671	59.3766	76.7348	148.421	94.2909	-0.322161	0.212783	0.32004	73.1	94.7059
Abi1	840.007	715.567	851.55	1102.3	1006.64	1046.43	1043.61	-0.38845	9.90868e-05	0.000393995	802.374	1049.74
Abi2	478.549	626.749	537.983	431.917	376.606	410.341	392.726	0.450889	0.000430878	0.00148023	547.76	402.898
Abi3	112.001	65.3562	84.5402	73.7419	97.9379	94.79	77.8129	-0.00159107	0.994698	0.997663	87.2991	86.0707
Abi3bp	346.185	460.845	361.217	247.083	246.359	204.547	271.887	0.689397	1.43676e-06	8.21519e-06	389.416	242.469
Abl1	1865.83	1664.07	1547.85	1111.87	1333.77	1353.25	1353.03	0.393562	7.55823e-05	0.00030848	1692.59	1287.98
Abl2	918.916	809.411	759.324	932.787	862.257	775.782	887.983	-0.0669764	0.535979	0.648789	829.217	864.702
Ablim1	2156.02	1829.97	1337.27	1192.32	1147.99	886.786	1297.19	0.639278	4.63476e-07	2.88216e-06	1774.42	1131.07
Ablim2	122.183	58.653	44.5757	39.2652	34.3287	33.6754	40.2796	0.912328	0.0015162	0.00458502	75.1372	36.8872
Ablim3	672.005	393.813	255.158	321.783	320.065	365.441	395.473	0.302265	0.200944	0.30573	440.325	350.69
Abo	2.54547	13.4064	1.53709	0.957687	4.03868	0	0	1.26357	0.026534	0.0566888	5.82966	1.24909
Abr	796.733	673.672	842.327	1968.05	1677.06	1973.13	884.321	-1.02778	3.46699e-07	2.20225e-06	770.911	1625.64
Abra	56.0004	23.4612	13.8338	8.61918	3.02901	3.74171	8.23901	1.47271	0.00903704	0.022256	31.0985	5.90723
Abracl	185.82	227.909	239.787	568.866	593.685	543.796	362.517	-1.19437	5.76284e-15	1.03661e-13	217.838	517.216
Abt1	106.91	150.822	115.282	153.23	148.421	149.668	164.78	-0.302841	0.0385282	0.0779255	124.338	154.025
Abtb1	313.093	191.041	173.692	112.049	108.035	122.229	236.185	0.628491	0.0117683	0.0280336	225.942	144.625
Abtb2	150.183	204.448	126.042	365.836	342.278	523.84	352.447	-1.24953	6.34234e-10	6.16658e-09	160.224	396.1
Acaa1a	481.095	423.977	493.407	402.229	531.086	506.378	589.547	-0.126832	0.304516	0.42394	466.16	507.31
Acaa1b	68.7278	82.1142	47.6499	9.57687	17.1644	17.4613	65.9121	1.11652	0.00481765	0.0127813	66.164	27.5287
Acaa2	575.277	1225.01	622.523	544.924	580.56	521.345	780.875	0.376327	0.0939163	0.164307	807.603	606.926
Acaca	6954.24	12672.4	8769.12	33846.6	29072.4	25065.7	9192.91	-1.22908	6.00933e-05	0.000249859	9465.25	24294.4
Acacb	2716.02	3291.27	1638.54	6097.59	6186.24	8587.23	2064.33	-1.07172	0.00182893	0.00542355	2548.61	5733.85
Acad10	183.274	130.712	132.19	107.261	120.151	106.015	107.107	0.391264	0.0180471	0.0405889	148.726	110.133
Acad11	534.55	774.22	557.965	1010.36	840.044	641.08	703.062	-0.32292	0.0825754	0.147282	622.245	798.637
Acad12	68.7278	68.7078	86.0772	38.3075	25.2417	22.4503	34.7869	1.23265	2.06673e-07	1.36557e-06	74.5043	30.1966
Acad8	282.548	321.754	250.546	375.413	339.249	367.935	275.549	-0.250968	0.0354981	0.0727921	284.949	339.537
Acad9	1155.65	859.685	1079.04	1245.95	1230.79	1258.46	1082.97	-0.22127	0.157694	0.251139	1031.46	1204.54
Acadl	1341.46	1952.31	810.048	837.976	688.594	458.983	2031.37	0.426854	0.186904	0.288673	1367.94	1004.23
Acadm	929.098	1508.22	803.9	932.787	814.803	698.453	851.365	0.375769	0.0651439	0.120841	1080.41	824.352
Acads	358.912	638.48	462.665	256.66	323.094	280.628	497.087	0.475762	0.0132226	0.0310201	486.686	339.367
Acadsb	885.825	1104.35	989.888	3579.83	3015.88	3235.33	1634.99	-1.45928	1.68202e-14	2.89086e-13	993.355	2866.51
Acadvl	1109.83	1952.31	1003.72	1310.12	1262.09	1086.34	1373.17	0.0968843	0.645276	0.744008	1355.29	1257.93
Acan	0	0	0	0	3.02901	2.49447	3.66178	-1.04776	0.0522188	0.100574	0	2.29632
Acap1	91.6371	35.1918	56.8725	27.7729	24.2321	29.9337	40.2796	0.793176	0.0754779	0.136585	61.2338	30.5546
Acap2	1527.28	1454.59	1526.33	3646.87	3438.93	3012.08	2501	-1.03806	1.93215e-11	2.34313e-10	1502.74	3149.72
Acap3	397.094	274.831	305.882	237.506	287.756	298.09	363.432	0.12831	0.429567	0.550215	325.936	296.696
Acat1	896.007	1409.35	1075.97	1788.96	1626.58	1869.61	935.586	-0.438061	0.0111739	0.0268337	1127.11	1555.18
Acat2	185.82	373.703	304.345	1105.17	1104.58	1132.49	242.593	-1.46604	2.06054e-05	9.45294e-05	287.956	896.208
Acat3	10.1819	15.0822	18.4451	14.3653	10.0967	7.48342	18.3089	0.228907	0.53598	0.648789	14.5697	12.5636
Acbd3	526.913	615.019	548.742	860.003	839.035	800.726	794.607	-0.53486	1.11406e-07	7.70814e-07	563.558	823.593
Acbd4	496.367	532.904	345.846	209.733	242.321	198.311	229.777	1.02058	2.34312e-08	1.79541e-07	458.373	220.035
Acbd5	666.914	673.672	564.113	1019.94	893.557	954.137	799.184	-0.520607	1.24749e-06	7.20727e-06	634.9	916.704
Acbd6	132.365	186.014	189.063	160.891	186.789	180.849	173.935	-0.0253225	0.854142	0.901958	169.147	175.616
Acbd7	7.63642	1.6758	21.5193	125.457	66.6381	61.1146	77.8129	-2.60466	1.59156e-12	2.20067e-11	10.2772	82.7557
Accs	221.456	98.8722	147.561	64.165	56.5415	64.8563	77.8129	1.18185	8.22747e-08	5.81028e-07	155.963	65.8439
Accsl	5.09095	1.6758	4.61128	1.91537	0	0	1.83089	0.896634	0.117206	0.196867	3.79268	0.936566
Acd	122.183	98.8722	122.967	128.33	139.334	170.872	171.188	-0.418846	0.00810975	0.0202333	114.674	152.431
Ace	379.276	599.936	747.028	973.968	737.058	920.461	546.521	-0.454434	0.0844315	0.15008	575.413	794.502
Ace2	10.1819	6.7032	0	84.2765	51.4931	89.8011	25.6325	-2.83308	1.19931e-10	1.28656e-09	5.62837	62.8008
Acer2	252.002	231.26	142.95	214.522	121.16	147.174	168.442	0.340973	0.0869737	0.154043	208.737	162.825
Acer3	239.275	370.352	345.846	294.968	307.949	283.123	309.421	0.118447	0.440692	0.561613	318.491	298.865
Ache	17.8183	16.758	16.908	4.78844	3.02901	13.7196	8.23901	0.919871	0.0644166	0.119654	17.1615	7.44402
Acin1	2413.11	1563.52	1640.08	1467.18	1528.64	1615.17	1532.46	0.27463	0.0195061	0.0433756	1872.24	1535.86
Ackr1	40.7276	46.9224	30.7419	22.9845	32.3094	22.4503	37.5333	0.422759	0.122333	0.204241	39.464	28.8194
Ackr2	15.2728	23.4612	33.8161	26.8152	27.2611	14.9668	33.8715	-0.0373985	0.92308	0.948396	24.1834	25.7287
Ackr3	145.092	125.685	261.306	282.518	204.963	187.086	330.476	-0.466761	0.11043	0.187686	177.361	251.261
Ackr4	53.455	43.5708	109.134	178.13	193.856	96.0373	48.5186	-0.791419	0.014201	0.033008	68.7198	129.136
Acly	4561.49	14830.8	11217.7	49568.9	48489.3	55075.5	11105.3	-1.75546	1.57269e-05	7.38665e-05	10203.3	41059.8
Acmsd	5.09095	8.379	9.22256	4.78844	10.0967	4.98895	3.66178	0.281038	0.572772	0.681659	7.56417	5.88396
Acnat1	0	1.6758	3.07419	0.957687	1.00967	2.49447	0	0.525528	0.357329	0.478867	1.58333	1.11546
Acnat2	0	0	1.53709	0	1.00967	0	0	0.167058	0.684441	NA	0.512365	0.252417
Aco1	1379.65	1778.02	1526.33	2800.28	2808.9	2707.75	1956.31	-0.701942	1.68636e-08	1.32711e-07	1561.33	2568.31
Aco2	2013.47	4933.56	2387.11	5315.16	5208.88	6101.49	2958.72	-0.633106	0.00472726	0.0125716	3111.38	4896.06
Acot1	697.46	549.662	382.736	553.543	529.066	356.71	1196.49	-0.229299	0.571364	0.680394	543.286	658.952
Acot10	0	0	0	1.91537	0	0	0	-0.0677373	0.89493	0.928611	0	0.478844
Acot11	45.8185	321.754	87.6143	101.515	138.325	76.0815	90.6291	0.413749	0.353225	0.475059	151.729	101.638
Acot12	0	1.6758	0	0.957687	1.00967	1.24724	0.915446	-0.172382	0.681304	NA	0.5586	1.03251
Acot13	117.092	125.685	144.487	233.676	168.615	273.145	250.832	-0.810133	1.40269e-05	6.64621e-05	129.088	231.567
Acot2	106.91	142.443	102.985	68.9535	96.9282	62.3619	152.879	0.293006	0.23861	0.350147	117.446	95.2808
Acot3	7.63642	0	6.14837	63.2073	61.5898	36.1699	16.478	-2.52749	2.62316e-07	1.69907e-06	4.59493	44.3613
Acot4	35.6366	25.137	46.1128	75.6573	59.5705	36.1699	47.6032	-0.574063	0.033513	0.0693623	35.6288	54.7502
Acot5	2.54547	0	3.07419	23.9422	34.3287	11.2251	6.40812	-2.27091	9.6264e-06	4.71078e-05	1.87322	18.976
Acot6	96.728	70.3836	72.2434	445.324	370.548	274.392	191.328	-1.92996	1.34795e-17	3.14889e-16	79.785	320.398
Acot7	91.6371	180.986	69.1692	83.3188	92.8895	82.3177	95.2064	0.302758	0.171683	0.269168	113.931	88.4331
Acot8	63.6369	77.0868	99.9111	113.965	142.363	117.24	132.74	-0.640086	0.00130322	0.00400985	80.2116	126.577
Acot9	231.638	343.539	312.03	464.478	439.206	490.164	467.793	-0.627531	3.34522e-05	0.00014702	295.736	465.41
Acox1	2374.93	2255.63	1667.75	1949.85	1590.23	1248.48	1871.17	0.32738	0.0253936	0.0545742	2099.43	1664.93
Acox2	5.09095	3.3516	7.68547	41.1805	42.4061	72.3398	17.3935	-2.34129	1.47006e-07	9.99212e-07	5.37601	43.33
Acox3	450.549	472.576	362.754	336.148	350.355	338.001	405.543	0.249154	0.045131	0.089187	428.626	357.512
Acoxl	2.54547	10.0548	9.22256	0.957687	3.02901	3.74171	0	1.36264	0.0112899	0.027072	7.27428	1.9321
Acp1	216.365	304.996	341.235	450.113	426.08	498.895	375.333	-0.571147	2.5418e-06	1.39583e-05	287.532	437.605
Acp2	537.095	546.311	622.523	373.498	356.413	339.249	388.149	0.647065	1.20493e-09	1.12355e-08	568.643	364.327
Acp5	468.367	963.585	743.953	362.006	291.794	351.721	354.278	1.0233	1.41206e-07	9.61998e-07	725.302	339.95
Acp6	277.457	236.288	213.656	149.399	145.392	165.883	213.299	0.50493	0.000981498	0.00311225	242.467	168.493
Acpp	30.5457	70.3836	41.5015	23.9422	40.3868	37.4171	15.5626	0.642106	0.0764772	0.138056	47.4769	29.3272
Acpt	10.1819	8.379	19.9822	11.4922	8.07735	2.49447	15.5626	0.307575	0.530511	0.643881	12.8477	9.40666
Acr	17.8183	3.3516	4.61128	2.87306	5.04834	6.23619	3.66178	0.498752	0.371565	0.493142	8.59373	4.45484
Acrbp	173.092	83.79	106.059	68.9535	57.5511	34.9226	76.8975	0.921367	0.00324107	0.00901345	120.981	59.5812
Acrv1	0	3.3516	0	15.323	10.0967	3.74171	2.74634	-1.66502	0.00257837	0.00737087	1.1172	7.97693
Acsbg1	63.6369	127.361	29.2048	7.6615	9.08702	6.23619	16.478	2.35801	8.11186e-08	5.73777e-07	73.4008	9.86568
Acsf2	341.094	402.192	288.974	107.261	92.8895	83.5649	129.993	1.68694	8.29175e-21	2.65246e-19	344.086	103.427
Acsf3	292.73	251.37	199.822	229.845	271.601	278.134	248.086	-0.0551601	0.774827	0.844851	247.974	256.916
Acsl1	5696.77	7774.04	6005.43	33783.4	27644.7	24240.1	20806.3	-1.93582	3.7539e-22	1.33829e-20	6492.08	26618.6
Acsl3	526.913	467.548	528.76	385.948	447.283	367.935	408.289	0.329213	0.073301	0.133325	507.741	402.364
Acsl4	758.551	854.658	836.179	5830.4	5250.28	5315.73	6989.43	-2.71574	2.30978e-27	1.22411e-25	816.463	5846.46
Acsl5	684.733	1104.35	885.366	1076.44	1054.09	1116.28	815.662	-0.173881	0.253337	0.367133	891.484	1015.62
Acsl6	17.8183	16.758	21.5193	0.957687	1.00967	2.49447	1.83089	2.3772	1.62778e-05	7.61921e-05	18.6985	1.57318
Acsm3	94.1826	56.9772	29.2048	68.9535	25.2417	12.4724	34.7869	0.665556	0.0810142	0.144963	60.1215	35.3636
Acsm4	2.54547	5.0274	4.61128	2.87306	1.00967	1.24724	2.74634	0.522668	0.363618	0.485061	4.06139	1.96908
Acsm5	104.364	55.3014	50.7241	43.0959	17.1644	9.9779	14.6471	1.56459	4.81061e-07	2.98106e-06	70.13	21.2213
Acss1	661.823	383.758	673.247	2560.86	1946.64	2519.42	1308.17	-1.8316	1.24537e-32	9.61318e-31	572.943	2083.77
Acss2	740.733	1898.68	1695.41	1139.65	1157.08	1232.27	298.435	0.451777	0.263669	0.379013	1444.94	956.859
Acss2os	28.0002	5.0274	30.7419	8.61918	8.07735	14.9668	3.66178	0.892781	0.0818191	0.146227	21.2565	8.83129
Acss3	552.368	377.055	218.267	215.48	120.151	74.8342	120.839	1.43959	9.12679e-09	7.49478e-08	382.563	132.826
Acta1	4113.49	7078.58	6566.46	7.6615	33.3191	14.9668	28.3788	2.32802	3.73578e-05	0.000162402	5919.51	21.0816
Acta2	2059.29	5662.53	3266.32	11380.2	13646.7	11129.1	16465.2	-1.76417	3.2784e-13	4.89115e-12	3662.71	13155.3
Actb	9362.25	19906.8	16511.5	24442.1	25883.9	27647.5	26651.4	-0.774133	1.85736e-05	8.58069e-05	15260.2	26156.2
Actbl2	5.09095	0	1.53709	2.87306	4.03868	8.73066	0.915446	-0.692684	0.222042	0.331161	2.20935	4.13946
Actc1	7.63642	45.2466	13.8338	1.91537	4.03868	2.49447	11.9008	1.3146	0.0209679	0.0461695	22.239	5.08733
Actg1	1069.1	1903.71	1497.13	2340.59	2446.43	2470.78	2916.61	-0.765038	1.15965e-05	5.57348e-05	1489.98	2543.6
Actg2	33.0912	402.192	83.0031	520.982	524.018	458.983	661.867	-1.48066	3.83293e-05	0.000166138	172.762	541.463
Actl10	2.54547	1.6758	10.7597	3.83075	7.06768	3.74171	1.83089	0.142853	0.798398	0.862055	4.99364	4.11776
Actl6a	308.002	387.11	447.294	756.573	722.923	873.066	607.856	-0.927751	3.77482e-14	6.24587e-13	380.802	740.104
Actl7a	5.09095	5.0274	4.61128	8.61918	1.00967	3.74171	2.74634	0.129071	0.81915	0.876833	4.90988	4.02923
Actl9	10.1819	3.3516	4.61128	8.61918	2.01934	4.98895	3.66178	0.0263363	0.962742	0.976015	6.04826	4.82231
Actn1	1015.64	1930.52	1243.51	1116.66	1397.38	1196.1	1682.59	0.0488534	0.730916	0.81277	1396.56	1348.18
Actn2	407.276	135.74	268.991	19.1537	15.145	24.9447	3.66178	2.12302	0.000232307	0.000850388	270.669	15.7263
Actn3	745.824	1531.68	1709.25	4.78844	5.04834	4.98895	2.74634	2.42336	1.85236e-05	8.55983e-05	1328.92	4.39302
Actn4	2413.11	3351.6	2974.28	4352.69	5135.18	5104.94	5188.75	-0.762619	2.28542e-07	1.49489e-06	2913	4945.39
Actr10	282.548	423.977	436.535	820.738	782.493	764.557	588.632	-0.913828	3.29065e-09	2.86664e-08	381.02	739.105
Actr1a	1206.55	1330.59	1198.93	1356.08	1497.34	1521.63	1722.87	-0.291046	0.0140462	0.032688	1245.36	1524.48
Actr1b	565.095	779.247	616.375	1018.98	1054.09	1229.78	914.53	-0.680903	7.11988e-15	1.26154e-13	653.572	1054.34
Actr2	1504.38	1561.85	1692.34	3495.56	3251.13	3311.42	2703.31	-0.991898	7.62494e-31	5.21706e-29	1586.19	3190.35
Actr3	1249.83	1471.35	1418.74	1920.16	1741.68	1865.87	1688.08	-0.370955	0.00229135	0.00663308	1379.97	1803.95
Actr3b	28.0002	25.137	56.8725	12.4499	15.145	7.48342	25.6325	1.16627	0.000869755	0.00279183	36.6699	15.1777
Actr5	185.82	145.795	130.653	88.1072	114.093	82.3177	98.8682	0.641044	0.000817875	0.0026401	154.089	95.8464
Actr6	114.546	120.658	112.208	92.8956	71.6865	78.576	86.0519	0.496102	0.00138073	0.00421629	115.804	82.3025
Actr8	409.821	315.05	345.846	357.217	316.026	355.463	341.461	0.0422894	0.697395	0.786579	356.906	342.542
Acvr1	369.094	400.516	407.33	351.471	349.345	209.536	419.274	0.236663	0.237053	0.348398	392.313	332.407
Acvr1b	488.731	397.165	413.478	583.231	666.381	592.438	841.295	-0.641934	4.21184e-06	2.22088e-05	433.125	670.836
Acvr1c	1148.01	1235.06	404.256	358.175	286.746	189.58	394.557	1.51533	1.79101e-10	1.88151e-09	929.11	307.265
Acvr2a	572.732	574.799	581.021	646.439	682.536	614.888	621.588	-0.147211	0.118408	0.198697	576.184	641.363
Acvr2b	119.637	93.8448	70.7063	20.1114	31.2997	33.6754	33.8715	1.55991	5.19939e-08	3.78165e-07	94.7295	29.7395
Acvrl1	318.184	346.891	313.567	438.621	567.434	548.784	500.749	-0.64538	9.70485e-05	0.00038667	326.214	513.897
Acy1	89.0916	88.8174	150.635	172.384	170.634	177.108	97.0373	-0.470562	0.0124917	0.0295744	109.515	154.291
Acy3	50.9095	35.1918	24.5935	45.969	33.3191	37.4171	24.717	-0.00360557	0.989805	0.994004	36.8983	35.3556
Acyp1	56.0004	46.9224	50.7241	53.6305	62.5995	82.3177	61.3349	-0.323209	0.152181	0.243891	51.2156	64.9706
Acyp2	45.8185	115.63	76.8547	76.615	61.5898	97.2845	56.7576	0.142842	0.547286	0.659327	79.4345	73.0617
Ada	117.092	90.4932	113.745	373.498	480.602	702.195	258.156	-1.98051	1.31258e-19	3.75864e-18	107.11	453.613
Adad1	0	0	1.53709	0	0	0	0	0.252594	0.51389	NA	0.512365	0
Adal	165.456	142.443	126.042	188.664	159.528	152.163	151.964	-0.188023	0.154731	0.247123	144.647	163.08
Adam10	1382.19	2188.59	1498.67	1437.49	1276.22	1245.99	1435.42	0.333937	0.0284361	0.0601878	1689.82	1348.78
Adam11	66.1823	41.895	27.6677	22.0268	35.3384	24.9447	20.1398	0.664847	0.0825323	0.147249	45.2483	25.6124
Adam12	224.002	593.233	230.564	213.564	385.694	303.079	233.439	0.229757	0.359117	0.480537	349.266	283.944
Adam15	852.734	864.713	802.363	557.374	636.091	619.877	645.389	0.445266	5.15844e-05	0.000217795	839.937	614.683
Adam17	753.46	935.096	874.606	853.299	809.754	825.671	885.236	0.0267941	0.81816	0.875987	854.388	843.49
Adam19	381.821	491.009	384.273	335.19	451.322	361.699	332.307	0.172694	0.272285	0.388534	419.035	370.13
Adam1a	124.728	70.3836	66.095	51.7151	53.5124	36.1699	58.5885	0.716413	0.0116666	0.0278399	87.069	49.9965
Adam1b	5.09095	0	3.07419	3.83075	0	0	0	0.436111	0.401122	0.522335	2.72171	0.957687
Adam2	2.54547	0	0	0.957687	0	0	0	0.0539812	0.830254	NA	0.848491	0.239422
Adam21	22.9093	13.4064	12.2967	9.57687	3.02901	4.98895	10.0699	0.96162	0.0297782	0.0626326	16.2041	6.91618
Adam22	119.637	194.393	181.377	94.811	89.8605	89.8011	88.7983	0.866757	0.000107722	0.000425093	165.136	90.8177
Adam23	183.274	698.809	385.811	229.845	212.03	217.019	217.876	0.856247	0.00238154	0.00686608	422.631	219.193
Adam28	5.09095	1.6758	4.61128	2.87306	3.02901	2.49447	0	0.510569	0.366723	0.488176	3.79268	2.09914
Adam3	0	3.3516	1.53709	0	0	1.24724	0.915446	0.601604	0.276273	0.393182	1.62956	0.540671
Adam30	0	0	0	0	0	1.24724	0	0.0370437	0.927791	NA	0	0.311809
Adam32	7.63642	5.0274	4.61128	6.70381	4.03868	2.49447	10.9854	-0.183831	0.735699	0.816555	5.75837	6.05558
Adam33	124.728	124.009	79.9289	36.3921	36.3481	53.6312	62.2503	1.15633	1.31921e-07	9.02554e-07	109.555	47.1554
Adam4	168.001	80.4384	107.597	95.7687	58.5608	38.6644	65.9121	0.703055	0.104876	0.179883	118.679	64.7265
Adam5	2.54547	13.4064	6.14837	0.957687	1.00967	0	2.74634	1.50793	0.00759319	0.0191057	7.36675	1.17842
Adam6b	0	0	4.61128	0	0	0	0	0.122132	0.558288	NA	1.53709	0
Adam7	0	1.6758	0	0	0	0	0	0.377831	0.427987	0.548706	0.5586	0
Adam8	140.001	212.827	135.264	78.5303	88.8509	77.3287	169.357	0.622098	0.0151452	0.0349205	162.697	103.517
Adam9	888.371	1050.73	863.847	1882.81	1711.39	1587.73	2621.84	-1.05293	5.17085e-12	6.78015e-11	934.315	1950.94
Adamdec1	33.0912	6.7032	90.6885	42.1382	33.3191	28.6865	51.265	0.114466	0.804574	0.866555	43.4943	38.8522
Adamts1	295.275	685.402	531.834	424.255	545.221	520.098	572.154	-0.0356459	0.866917	0.909979	504.171	515.432
Adamts10	822.188	643.507	533.372	240.379	309.968	248.2	258.156	1.30029	2.91024e-12	3.91427e-11	666.356	264.176
Adamts12	1008.01	2198.65	1158.97	1263.19	1295.41	1147.46	1127.83	0.240913	0.22258	0.331713	1455.21	1208.47
Adamts13	7.63642	0	3.07419	6.70381	5.04834	12.4724	21.9707	-1.30575	0.0127251	0.0300388	3.5702	11.5488
Adamts14	81.4552	152.498	69.1692	45.0113	72.6962	71.0925	82.3901	0.527903	0.0149905	0.0345907	101.041	67.7975
Adamts15	682.187	1379.18	605.615	452.028	639.12	486.423	474.201	0.735079	0.000114244	0.000447846	888.995	512.943
Adamts16	2.54547	8.379	1.53709	8.61918	16.1547	8.73066	29.2943	-1.20149	0.0130563	0.03069	4.15386	15.6997
Adamts17	96.728	135.74	61.4837	94.811	133.276	67.3508	68.6584	0.0633644	0.820454	0.877966	97.9839	91.0241
Adamts18	180.729	780.923	133.727	70.8688	72.6962	52.384	68.6584	2.13513	1.95053e-13	2.99047e-12	365.126	66.1519
Adamts19	0	21.7854	3.07419	14.3653	15.145	7.48342	21.9707	-0.574125	0.190633	0.293259	8.28653	14.7411
Adamts2	277.457	1089.27	577.947	561.205	707.778	518.851	629.827	0.0448341	0.847265	0.896658	648.225	604.415
Adamts20	109.455	279.859	75.3176	22.0268	29.2804	34.9226	32.0406	2.14507	8.10692e-13	1.16073e-11	154.877	29.5676
Adamts3	432.731	380.407	301.27	67.0381	102.986	59.8674	86.9674	2.15389	2.94433e-24	1.24758e-22	371.469	79.2148
Adamts4	63.6369	180.986	24.5935	52.6728	124.189	98.5318	127.247	-0.245327	0.412177	0.533094	89.7389	100.66
Adamts5	1206.55	1540.06	1374.16	9903.44	8574.11	6147.63	1854.69	-2.09436	4.51836e-14	7.40711e-13	1373.59	6619.97
Adamts6	58.5459	50.274	33.8161	40.2229	35.3384	34.9226	37.5333	0.314684	0.358302	0.479916	47.5453	37.0043
Adamts7	264.729	378.731	189.063	85.2341	126.209	92.2956	97.0373	1.40727	7.94019e-16	1.56286e-14	277.508	100.194
Adamts8	71.2733	160.877	69.1692	30.646	35.3384	28.6865	19.2244	1.65723	1.96445e-08	1.52768e-07	100.44	28.4738
Adamts9	941.826	1117.76	533.372	1067.82	1038.95	880.55	1036.28	-0.230982	0.19594	0.299734	864.319	1005.9
Adamtsl1	315.639	182.662	267.454	201.114	187.798	178.355	152.879	0.477433	0.0196621	0.0436787	255.252	180.037
Adamtsl2	5.09095	3.3516	13.8338	19.1537	18.174	6.23619	5.49268	-0.558436	0.295975	0.414313	7.42546	12.2642
Adamtsl3	101.819	112.279	69.1692	60.3343	59.5705	47.395	61.3349	0.680549	0.00384395	0.0104848	94.4223	57.1587
Adamtsl4	264.729	271.48	288.974	105.346	148.421	137.196	168.442	0.958156	2.72772e-06	1.48643e-05	275.061	139.851
Adamtsl5	78.9097	120.658	96.8369	58.4189	61.5898	54.8784	98.8682	0.517581	0.0134744	0.0315183	98.8014	68.4388
Adap1	157.819	124.009	102.985	15.323	32.3094	19.9558	39.3642	2.14262	4.1609e-14	6.8591e-13	128.271	26.7381
Adap2	246.911	177.635	261.306	134.076	113.083	112.251	145.556	0.83399	3.19542e-05	0.000141193	228.617	126.242
Adar	985.099	747.407	759.324	1268.94	1065.2	954.137	1017.98	-0.377473	0.00939917	0.0230201	830.61	1076.56
Adarb1	315.639	217.854	198.285	231.76	237.272	207.041	249.917	0.0547145	0.768925	0.841335	243.926	231.498
Adarb2	5.09095	15.0822	3.07419	1.91537	0	0	0	1.89695	0.0009635	0.00306175	7.74911	0.478844
Adat1	198.547	105.575	127.579	92.8956	92.8895	67.3508	86.0519	0.701491	0.00314033	0.00877868	143.9	84.797
Adat2	63.6369	35.1918	43.0386	29.6883	23.2224	33.6754	27.4634	0.659839	0.0201641	0.0446107	47.2891	28.5124
Adat3	20.3638	28.4886	26.1306	13.4076	25.2417	28.6865	40.2796	-0.116746	0.753061	0.830013	24.9943	26.9039
Adck1	155.274	162.553	210.582	172.384	215.059	205.794	194.99	-0.157662	0.232534	0.343236	176.136	197.057
Adck2	333.457	186.014	198.285	169.511	172.653	148.421	242.593	0.355657	0.113002	0.191089	239.252	183.295
Adck3	582.914	583.178	379.662	829.357	687.584	699.7	692.993	-0.446596	0.195171	0.298738	515.251	727.409
Adck4	208.729	175.959	179.84	121.626	154.479	109.757	178.512	0.390615	0.0268282	0.0572417	188.176	141.094
Adck5	267.275	199.42	170.617	103.43	98.9475	128.465	123.585	0.871849	2.85275e-05	0.00012732	212.437	113.607
Adcy1	33.0912	73.7352	18.4451	7.6615	7.06768	11.2251	14.6471	1.70976	2.70581e-05	0.000121218	41.7572	10.1504
Adcy10	15.2728	53.6256	36.8902	32.5614	21.203	17.4613	13.7317	0.648323	0.0956073	0.166593	35.2629	21.2394
Adcy2	28.0002	33.516	39.9644	53.6305	35.3384	42.4061	27.4634	-0.204918	0.576643	0.684981	33.8269	39.7096
Adcy3	198.547	365.324	169.08	115.88	140.344	112.251	131.824	0.914235	1.97337e-07	1.30728e-06	244.317	125.075
Adcy4	389.458	279.859	192.137	229.845	253.427	202.052	303.013	0.191912	0.328713	0.450028	287.151	247.084
Adcy5	519.277	658.589	267.454	206.86	295.833	113.499	376.248	0.902632	0.000488916	0.00166065	481.773	248.11
Adcy6	2499.66	1875.22	1487.91	920.337	1121.74	889.28	1255.08	0.900967	1.61633e-09	1.47615e-08	1954.26	1046.61
Adcy7	521.822	794.329	763.936	342.852	352.374	339.249	379.91	0.948481	7.04575e-06	3.54866e-05	693.362	353.596
Adcy8	5.09095	1.6758	0	0	3.02901	0	0	0.589526	0.302598	0.421708	2.25558	0.757252
Adcy9	786.552	519.498	574.873	830.315	759.271	729.634	640.812	-0.250714	0.0395079	0.0796709	626.974	740.008
Adcyap1r1	124.728	387.11	233.638	161.849	169.624	189.58	177.597	0.469238	0.0459589	0.0905167	248.492	174.663
Add1	1316.01	1734.45	1524.8	1134.86	1212.61	1027.72	1537.03	0.315743	0.0054655	0.0143267	1525.09	1228.06
Add2	2.54547	5.0274	1.53709	3.83075	1.00967	0	0.915446	0.552922	0.335129	0.45656	3.03666	1.43897
Add3	771.279	940.124	1012.94	857.13	808.745	981.576	949.317	0.0214472	0.881838	0.919599	908.116	899.192
Adgb	45.8185	30.1644	47.6499	0.957687	5.04834	1.24724	3.66178	3.20441	5.18449e-15	9.34472e-14	41.2109	2.72876
Adgra1	0	0	0	7.6615	5.04834	1.24724	10.0699	-1.91479	0.000508691	0.00172192	0	6.00675
Adgra2	743.279	926.717	1146.67	810.203	740.087	748.342	753.412	0.294588	0.0950187	0.165746	938.889	763.011
Adgra3	208.729	524.525	292.048	170.468	254.437	198.311	240.762	0.615665	0.00294791	0.00829827	341.767	215.994
Adgrb1	2.54547	15.0822	1.53709	1.91537	2.01934	2.49447	4.57723	0.724688	0.19878	0.303119	6.38826	2.7516
Adgrb2	20.3638	70.3836	32.279	14.3653	15.145	14.9668	24.717	1.13004	0.000376583	0.00131172	41.0088	17.2986
Adgrb3	7.63642	0	3.07419	0.957687	1.00967	0	0.915446	0.842681	0.128948	0.213181	3.5702	0.7207
Adgrd1	122.183	418.95	259.769	248.999	197.895	193.322	315.829	0.121701	0.588718	0.695	266.967	239.011
Adgre1	246.911	440.735	561.039	300.714	257.466	260.673	335.053	0.52028	0.0357177	0.073217	416.229	288.476
Adgre4	43.2731	36.8676	35.3532	22.0268	17.1644	27.4392	29.2943	0.624296	0.0800802	0.143582	38.4979	23.9812
Adgre5	514.186	487.658	447.294	349.556	337.229	294.348	403.712	0.471175	0.00853668	0.0211558	483.046	346.211
Adgrf1	56.0004	6.7032	16.908	353.387	311.988	340.496	341.461	-3.58173	5.54308e-27	2.85252e-25	26.5372	336.833
Adgrf2	5.09095	10.0548	4.61128	8.61918	7.06768	1.24724	5.49268	0.136833	0.793698	0.85865	6.58568	5.60669
Adgrf3	7.63642	1.6758	4.61128	16.2807	3.02901	4.98895	8.23901	-0.610431	0.268692	0.384725	4.64117	8.13441
Adgrf4	17.8183	18.4338	4.61128	12.4499	5.04834	7.48342	5.49268	0.608314	0.190353	0.292904	13.6211	7.61859
Adgrf5	2499.66	1669.1	1320.36	2560.86	2085.98	2160.22	2478.11	-0.34947	0.0332766	0.0689453	1829.71	2321.29
Adgrg1	837.461	749.083	810.048	1373.32	1404.45	1703.73	1329.23	-0.84683	4.35065e-08	3.19575e-07	798.864	1452.68
Adgrg2	162.91	129.037	129.116	162.807	97.9379	93.5428	115.346	0.254704	0.178486	0.278114	140.354	117.408
Adgrg3	61.0914	60.3288	47.6499	12.4499	17.1644	13.7196	31.1252	1.46167	8.8488e-07	5.24371e-06	56.3567	18.6148
Adgrg5	22.9093	20.1096	27.6677	17.2384	22.2127	19.9558	27.4634	0.125386	0.732841	0.814197	23.5622	21.7176
Adgrg6	165.456	402.192	132.19	126.415	118.131	88.5539	124.501	0.981648	2.57005e-05	0.00011587	233.279	114.4
Adgrg7	2.54547	3.3516	6.14837	5.74612	6.05801	17.4613	4.57723	-0.832617	0.131832	0.216999	4.01515	8.46067
Adgrl1	588.005	945.151	502.63	362.006	488.68	456.489	401.881	0.631924	9.77623e-05	0.000389251	678.595	427.264
Adgrl2	916.371	811.087	859.235	1987.2	1724.51	1605.19	1521.47	-0.974417	1.17151e-11	1.46782e-10	862.231	1709.6
Adgrl3	445.458	491.009	378.125	234.633	349.345	203.3	263.648	0.72337	2.192e-05	0.000100198	438.197	262.732
Adgrl4	519.277	417.274	375.051	663.677	511.902	455.242	628.911	-0.363231	0.0204349	0.0451301	437.201	564.933
Adgrv1	10.1819	6.7032	3.07419	3.83075	1.00967	2.49447	2.74634	0.872635	0.111301	0.18886	6.65309	2.52031
Adh1	236.729	236.288	299.733	210.691	139.334	132.207	129.078	0.716968	0.00487691	0.0129192	257.583	152.828
Adh4	2.54547	1.6758	0	0	0	0	0	0.702504	0.156502	NA	1.40709	0
Adh5	468.367	646.859	639.431	902.141	863.267	791.996	696.654	-0.461487	0.000103429	0.000409244	584.886	813.515
Adh6-ps1	0	1.6758	1.53709	0.957687	0	1.24724	0	0.51804	0.363151	0.484547	1.07096	0.551231
Adh6a	0	1.6758	1.53709	0	0	0	0.915446	0.161016	0.614574	NA	1.07096	0.228861
Adh7	15.2728	8.379	33.8161	47.8844	30.2901	38.6644	23.8016	-0.679265	0.127909	0.211818	19.156	35.1601
Adhfe1	257.093	507.767	232.101	473.097	368.529	341.743	270.057	-0.124859	0.583745	0.690967	332.32	363.357
Adi1	188.365	201.096	210.582	280.602	252.417	256.931	276.465	-0.400459	0.00289417	0.00816382	200.014	266.604
Adig	246.911	413.923	224.416	512.363	441.225	326.776	342.377	-0.467747	0.071963	0.131322	295.083	405.685
Adipoq	4006.58	6999.82	3867.33	2775.38	1435.75	1312.09	2301.43	1.23822	3.24138e-06	1.74386e-05	4957.91	1956.16
Adipor1	1041.1	1127.81	1117.47	1640.52	1628.6	1899.54	1963.63	-0.703274	2.18887e-12	2.98702e-11	1095.46	1783.07
Adipor2	2891.66	4502.87	2328.7	3303.06	2808.9	2544.36	2869.01	0.159981	0.374757	0.496266	3241.08	2881.33
Adk	506.549	553.014	637.894	1132.94	966.253	1051.42	586.801	-0.690867	1.22058e-06	7.07715e-06	565.819	934.355
Adm	15.2728	58.653	29.2048	49.7997	54.5221	76.0815	43.9414	-0.626373	0.0327211	0.0680146	34.3769	56.0862
Adm2	5.09095	0	0	5.74612	23.2224	17.4613	7.32357	-2.33739	2.69615e-05	0.000120869	1.69698	13.4383
Adnp	50.9095	23.4612	32.279	22.0268	19.1837	22.4503	30.2097	0.456322	0.292988	0.411111	35.5499	23.4676
Adnp2	305.457	289.913	319.715	316.037	321.075	347.979	285.619	-0.0560726	0.628127	0.729589	305.029	317.677
Ado	351.275	516.146	471.888	612.92	682.536	684.733	534.62	-0.469089	0.00315026	0.00880089	446.437	628.702
Adora1	285.093	237.964	235.175	74.6996	52.5028	47.395	54.0113	2.05786	4.35692e-21	1.42981e-19	252.744	57.1522
Adora2a	53.455	46.9224	49.187	31.6037	35.3384	41.1588	53.0959	0.265423	0.398805	0.519891	49.8548	40.2992
Adora2b	5.09095	11.7306	12.2967	6.70381	7.06768	4.98895	17.3935	0.173239	0.693989	0.784033	9.7061	9.03848
Adora3	0	5.0274	7.68547	0.957687	1.00967	0	1.83089	1.13237	0.0498568	0.0969609	4.23762	0.949562
Adpgk	318.184	291.589	262.843	415.636	406.897	361.699	302.097	-0.35522	0.00797401	0.0199495	290.872	371.582
Adprh	106.91	206.123	150.635	126.415	173.663	153.41	182.174	-0.0274939	0.881576	0.919599	154.556	158.915
Adprhl1	30.5457	15.0822	13.8338	1.91537	1.00967	0	0.915446	2.59071	2.83382e-06	1.53905e-05	19.8206	0.960122
Adprhl2	259.638	227.909	212.119	93.8533	184.769	188.333	186.751	0.517697	0.00343029	0.00947296	233.222	163.427
Adprm	99.2735	95.5206	87.6143	103.43	102.986	78.576	121.754	-0.125146	0.455536	0.575162	94.1361	101.687
Adra1a	455.64	620.046	265.917	147.484	103.996	48.6423	99.7836	1.98267	2.39982e-11	2.87493e-10	447.201	99.9764
Adra1b	0	1.6758	3.07419	1.91537	5.04834	1.24724	1.83089	-0.206522	0.714858	0.800579	1.58333	2.51046
Adra1d	20.3638	26.8128	4.61128	6.70381	13.1257	7.48342	9.15446	0.707185	0.106318	0.181864	17.2626	9.11685
Adra2a	28.0002	60.3288	23.0564	8.61918	15.145	22.4503	24.717	0.963173	0.00744083	0.0187675	37.1285	17.7329
Adra2b	12.7274	8.379	6.14837	6.70381	6.05801	11.2251	12.8162	-0.146113	0.762944	0.836698	9.08492	9.2008
Adra2c	12.7274	1.6758	4.61128	0	1.00967	1.24724	2.74634	1.2578	0.0286204	0.0605128	6.33815	1.25081
Adrb1	63.6369	77.0868	56.8725	61.292	65.6285	120.982	45.7723	-0.134379	0.624779	0.727032	65.8654	73.4187
Adrb2	173.092	122.333	101.448	243.253	152.46	167.13	151.049	-0.436846	0.0533297	0.102414	132.291	178.473
Adrb3	2008.38	1530.01	545.668	158.018	138.325	127.218	240.762	2.80181	7.59139e-19	2.01461e-17	1361.35	166.081
Adrbk1	1084.37	894.877	1092.87	1556.24	1723.5	2235.05	1516.89	-0.758641	7.61881e-07	4.5605e-06	1024.04	1757.92
Adrbk2	1417.83	702.16	1028.32	667.508	624.985	673.508	816.578	0.56005	0.00159	0.00478212	1049.44	695.645
Adrm1	221.456	288.238	264.38	362.963	488.68	533.818	393.642	-0.771547	3.0123e-08	2.2642e-07	258.025	444.776
Adsl	430.185	511.119	541.057	649.312	740.087	753.331	485.186	-0.399059	0.000257583	0.000933483	494.12	656.979
Adss	845.097	888.174	759.324	852.341	883.46	858.099	918.192	-0.0749522	0.699421	0.788364	830.865	878.023
Adssl1	86.5461	172.607	146.024	26.8152	26.2514	28.6865	18.3089	2.02104	2.6857e-06	1.46759e-05	135.059	25.0155
Adtrp	45.8185	72.0594	19.9822	18.1961	2.01934	3.74171	10.0699	1.95907	1.98861e-05	9.14422e-05	45.9534	8.50675
Aebp1	916.371	1608.77	1847.59	635.904	878.412	698.453	967.626	0.856635	2.85992e-05	0.000127575	1457.58	795.099
Aebp2	959.644	784.274	869.995	1043.88	911.731	787.007	976.781	-0.0979745	0.307955	0.427744	871.304	929.849
Aen	137.456	159.201	166.006	294.968	353.384	235.728	225.2	-0.839232	7.50225e-06	3.7562e-05	154.221	277.32
Aes	659.278	1119.43	1046.76	1380.98	1509.45	2206.36	1310	-0.751495	9.78207e-14	1.54787e-12	941.824	1601.7
AF251705	25.4547	36.8676	102.985	59.3766	41.3964	36.1699	63.1658	0.192453	0.531946	0.645121	55.1025	50.0272
AF357355	0	3.3516	3.07419	0.957687	2.01934	0	0.915446	0.570655	0.318775	0.438996	2.14193	0.973118
AF357359	5.09095	11.7306	18.4451	11.4922	10.0967	6.23619	6.40812	0.471043	0.289944	0.40793	11.7556	8.55831
AF357399	12.7274	8.379	9.22256	11.4922	10.0967	9.9779	10.9854	-0.0989952	0.815027	0.873527	10.1096	10.638
AF357425	0	3.3516	0	1.91537	6.05801	2.49447	0	-0.541481	0.335866	0.457212	1.1172	2.61697
AF357426	2.54547	0	0	0	1.00967	0	1.83089	0.0951874	0.863244	0.907188	0.848491	0.71014
AF529169	43.2731	132.388	26.1306	12.4499	7.06768	11.2251	13.7317	2.20618	3.22718e-09	2.81878e-08	67.264	11.1186
Afap1	1244.74	1245.12	1131.3	723.054	879.422	747.095	1151.63	0.465911	0.00102746	0.00324064	1207.05	875.3
Afap1l1	361.457	241.315	225.953	228.887	304.92	260.673	238.016	0.076757	0.638728	0.738328	276.242	258.124
Afap1l2	150.183	420.626	178.303	138.865	159.528	158.399	182.174	0.577996	0.00764779	0.0192267	249.704	159.741
Aff1	1547.65	1253.5	1503.28	1205.73	1203.53	1102.56	1370.42	0.222759	0.0874955	0.154767	1434.81	1220.56
Aff2	17.8183	20.1096	29.2048	14.3653	15.145	7.48342	10.9854	0.828474	0.0238119	0.0516024	22.3776	11.9948
Aff3	99.2735	113.954	116.819	138.865	138.325	106.015	136.401	-0.206128	0.455789	0.575309	110.016	129.901
Aff4	2863.66	3318.08	2828.25	3712	3540.91	3224.11	3990.43	-0.262988	0.00389979	0.0106191	3003.33	3616.86
Afg3l1	455.64	415.598	371.977	599.512	638.111	648.563	545.606	-0.559288	3.51757e-07	2.23119e-06	414.405	607.948
Afg3l2	758.551	606.64	573.336	761.361	793.6	821.929	736.934	-0.273094	0.0325649	0.0677079	646.176	778.456
Afmid	104.364	40.2192	64.5579	46.9267	47.4544	46.1478	60.4194	0.390358	0.146359	0.236267	69.7139	50.2371
Afp	0	0	0	0	0	0	0.915446	0.0433771	0.910783	NA	0	0.228861
Aftph	1359.28	1002.13	1185.1	1776.51	1573.06	1933.22	1864.76	-0.612295	1.48663e-12	2.06361e-11	1182.17	1786.89
Aga	127.274	186.014	175.229	192.495	202.943	202.052	155.626	-0.182865	0.212312	0.319575	162.839	188.279
Agap1	1132.74	1007.16	986.814	1877.07	1833.56	2313.63	1585.55	-0.840702	6.55607e-07	3.96851e-06	1042.24	1902.45
Agap2	68.7278	92.169	70.7063	34.4767	32.3094	32.4282	35.7024	1.0789	0.00112182	0.00350402	77.201	33.7292
Agap3	631.278	688.754	581.021	389.779	532.095	648.563	545.606	0.265768	0.0441505	0.0875142	633.684	529.011
Agbl1	61.0914	16.758	36.8902	0	0	0	0	1.16139	0.00835494	0.0207576	38.2465	0
Agbl2	5.09095	1.6758	13.8338	9.57687	5.04834	2.49447	11.9008	-0.0393494	0.935978	0.957286	6.86686	7.25512
Agbl3	76.3642	62.0046	73.7805	53.6305	38.3674	56.1257	64.9967	0.397436	0.0918105	0.161179	70.7164	53.2801
Agbl4	0	0	1.53709	1.91537	0	1.24724	0	-0.0578121	0.894912	NA	0.512365	0.790653
Agbl5	488.731	273.155	376.588	209.733	176.692	218.267	269.141	0.766648	0.000101979	0.000404229	379.491	218.458
Ager	40.7276	23.4612	19.9822	15.323	18.174	27.4392	31.1252	0.192319	0.609708	0.71314	28.057	23.0154
Agfg1	697.46	630.101	905.348	1191.36	943.031	1128.75	1160.79	-0.566235	3.86722e-05	0.000167501	744.303	1105.98
Agfg2	114.546	132.388	126.042	129.288	138.325	165.883	149.218	-0.221109	0.23327	0.343962	124.325	145.678
Aggf1	567.641	527.877	527.223	473.097	536.134	518.851	548.352	0.0535651	0.606338	0.710509	540.914	519.109
Agk	119.637	150.822	130.653	156.103	125.199	137.196	114.431	0.0208773	0.898529	0.93088	133.704	133.232
Agl	814.552	946.827	952.998	772.853	652.246	678.497	534.62	0.444338	0.0240195	0.0519753	904.792	659.554
Agmat	0	1.6758	0	0	0	0	2.74634	-0.00426015	0.99347	0.996642	0.5586	0.686584
Agmo	274.911	209.475	185.988	194.41	124.189	115.993	112.6	0.682814	0.000511666	0.00173097	223.458	136.798
Ago1	1051.28	1067.48	1008.33	885.861	925.866	863.088	792.776	0.265844	0.00092886	0.00296174	1042.37	866.898
Ago2	1109.83	1112.73	1092.87	973.968	875.383	834.402	979.527	0.264084	0.105098	0.180142	1105.14	915.82
Ago3	745.824	544.635	551.817	753.7	636.091	614.888	593.209	-0.0896961	0.595541	0.701189	614.092	649.472
Ago4	310.548	266.452	182.914	219.31	160.537	193.322	211.468	0.347113	0.019826	0.0439934	253.305	196.159
Agpat1	325.821	442.411	376.588	1051.54	1158.09	1820.97	738.765	-1.57251	1.34307e-23	5.4565e-22	381.607	1192.34
Agpat2	654.187	2064.59	1377.24	692.408	478.583	276.887	456.808	1.32152	5.67388e-05	0.000237166	1365.34	476.171
Agpat3	809.461	1067.48	622.523	516.193	562.386	374.171	1051.85	0.390455	0.0795643	0.142873	833.156	626.149
Agpat4	61.0914	65.3562	73.7805	277.729	243.33	203.3	99.7836	-1.54961	5.75926e-09	4.86441e-08	66.7427	206.036
Agpat5	155.274	268.128	253.62	498.955	467.477	495.153	201.398	-0.815375	0.000214747	0.000792643	225.674	415.746
Agpat6	1308.37	1281.99	1175.88	5024.98	4526.35	4193.21	3083.22	-1.71114	6.86702e-55	2.03195e-52	1255.41	4206.94
Agpat9	412.367	367	298.196	128.33	76.7348	64.8563	210.553	1.53436	3.87335e-09	3.33337e-08	359.188	120.118
Agps	1814.92	1412.7	2041.26	2735.15	2750.34	2636.66	5511.9	-0.96471	4.34702e-06	2.28537e-05	1756.29	3408.51
Agr2	0	0	0	48.842	44.4254	29.9337	9.15446	-3.83242	4.36258e-13	6.40639e-12	0	33.0889
Agr3	0	1.6758	0	0	0	0	1.83089	0.0894712	0.847889	NA	0.5586	0.457723
Agrn	2973.11	3497.39	2191.9	1416.42	1643.74	1415.61	2651.13	0.684818	0.00021685	0.000799577	2887.47	1781.73
Agrp	15.2728	11.7306	12.2967	6.70381	5.04834	6.23619	3.66178	0.95129	0.0559087	0.106498	13.1001	5.41253
Agt	109.455	45.2466	69.1692	392.652	560.366	643.574	177.597	-2.26403	1.69405e-09	1.54078e-08	74.6237	443.547
Agtpbp1	870.552	569.772	539.52	822.653	719.894	752.084	705.809	-0.203486	0.0808541	0.144735	659.948	750.11
Agtr1a	1293.1	1357.4	534.909	185.791	204.963	83.5649	96.1218	2.62106	1.09106e-17	2.56225e-16	1061.8	142.61
Agtr1b	0	0	0	0	0	0	0	0	1	NA	0	0
Agtr2	0	3.3516	0	1.91537	12.116	1.24724	4.57723	-0.571836	0.316043	0.436216	1.1172	4.96397
Agtrap	315.639	447.439	348.92	267.195	231.214	275.639	336.884	0.415359	0.00415672	0.0112272	370.666	277.733
Agxt2	15.2728	5.0274	6.14837	7.6615	8.07735	8.73066	8.23901	-0.104366	0.836907	0.88994	8.81621	8.17713
Ahctf1	1837.83	1551.79	1916.76	2273.55	2171.8	2256.25	1926.1	-0.287314	0.00013265	0.000511748	1768.79	2156.92
Ahcy	129.819	224.557	176.766	138.865	203.953	251.942	123.585	-0.00476838	0.981871	0.988777	177.047	179.586
Ahcyl1	1473.83	1642.28	1340.35	1806.2	1521.57	1721.19	1326.48	-0.0951585	0.397528	0.518607	1485.49	1593.86
Ahcyl2	1165.83	1265.23	937.627	1518.89	1425.65	1188.62	1852.86	-0.409534	0.041502	0.0829947	1122.89	1496.51
Ahdc1	806.915	987.046	743.953	376.371	545.221	647.316	661.867	0.582318	0.0105624	0.0255276	845.972	557.694
Ahi1	152.728	172.607	104.522	73.7419	87.8412	62.3619	79.6438	0.881424	1.64815e-06	9.33471e-06	143.286	75.8972
Ahnak	29560.6	33338.4	27042.1	18543.7	19487.6	13878	28492.3	0.585005	3.07455e-05	0.000136192	29980.3	20100.4
Ahr	603.277	1052.4	579.484	344.767	329.152	320.54	554.76	0.932994	1.85452e-06	1.03975e-05	745.055	387.305
Ahrr	0	13.4064	6.14837	2.87306	5.04834	3.74171	9.15446	0.356248	0.488206	0.605274	6.51826	5.20439
Ahsa1	381.821	688.754	696.303	984.502	1021.78	1199.84	878.828	-0.771008	1.7201e-07	1.15371e-06	588.959	1021.24
Ahsa2	264.729	234.612	262.843	250.914	226.166	260.673	286.535	-0.0141085	0.901259	0.933326	254.061	256.072
Ahsg	0	0	1.53709	0.957687	0	0	0	0.126241	0.734282	NA	0.512365	0.239422
AI118078	0	5.0274	6.14837	0.957687	0	0	0	1.44579	0.0122811	0.029138	3.72526	0.239422
AI182371	7.63642	8.379	12.2967	7.6615	12.116	6.23619	2.74634	0.316781	0.495841	0.612351	9.43739	7.19001
AI197445	28.0002	15.0822	16.908	4.78844	3.02901	3.74171	9.15446	1.50553	0.00192574	0.00568688	19.9968	5.1784
AI314180	2522.57	2057.88	2268.75	2445.93	2360.61	2369.75	2262.07	-0.0538053	0.390657	0.511748	2283.07	2359.59
AI314278	2.54547	1.6758	1.53709	0	1.00967	0	0.915446	0.63407	0.23898	0.350474	1.91946	0.481279
AI317395	0	13.4064	1.53709	0.957687	1.00967	2.49447	0.915446	1.16373	0.0369545	0.0752396	4.98116	1.34432
AI413582	25.4547	40.2192	86.0772	28.7306	30.2901	24.9447	68.6584	0.398003	0.228687	0.338794	50.5837	38.156
AI414108	50.9095	68.7078	55.3354	36.3921	27.2611	37.4171	49.4341	0.587426	0.0603105	0.113319	58.3176	37.6261
AI427809	12.7274	15.0822	13.8338	0.957687	0	1.24724	5.49268	2.0861	2.58447e-05	0.000116429	13.8811	1.9244
AI429214	35.6366	30.1644	29.2048	42.1382	33.3191	48.6423	49.4341	-0.426625	0.11351	0.191765	31.6686	43.3834
AI450353	20.3638	5.0274	23.0564	22.0268	20.1934	28.6865	10.0699	-0.304072	0.491621	0.608447	16.1492	20.2441
AI463170	58.5459	20.1096	27.6677	58.4189	51.4931	83.5649	63.1658	-0.871219	0.00435933	0.0117	35.4411	64.1607
AI464131	198.547	259.749	215.193	201.114	195.876	223.255	191.328	0.148108	0.356797	0.478328	224.496	202.893
AI467606	7.63642	25.137	38.4273	17.2384	13.1257	18.7086	24.717	0.386357	0.370231	0.491939	23.7336	18.4474
AI504432	38.1821	16.758	58.4096	21.0691	21.203	14.9668	25.6325	0.726902	0.0851905	0.151278	37.7832	20.7179
AI506816	28.0002	38.5434	56.8725	110.134	125.199	155.905	54.9268	-1.31853	1.50035e-06	8.53485e-06	41.1387	111.541
AI507597	2.54547	1.6758	1.53709	1.91537	4.03868	11.2251	1.83089	-0.875414	0.1163	0.19564	1.91946	4.75252
AI593442	2.54547	0	0	0	3.02901	0	0	-0.032806	0.945196	0.963595	0.848491	0.757252
AI597479	241.82	321.754	307.419	324.656	333.191	319.293	317.66	-0.134211	0.282523	0.400056	290.331	323.7
AI606473	7.63642	16.758	7.68547	1.91537	7.06768	4.98895	3.66178	1.0824	0.0164757	0.0375157	10.6933	4.40845
AI607873	229.093	219.53	398.107	294.968	181.74	104.768	205.975	0.531936	0.0414325	0.0828823	282.243	196.863
AI661453	132.365	169.256	142.95	326.571	359.442	364.193	293.858	-1.13272	1.82936e-05	8.46235e-05	148.19	336.016
AI662270	50.9095	56.9772	73.7805	45.0113	24.2321	208.289	34.7869	-0.295541	0.498037	0.614423	60.5557	78.0797
AI837181	91.6371	140.767	110.671	98.6418	99.9572	103.521	121.754	0.0904946	0.600552	0.705498	114.358	105.968
AI839979	7.63642	11.7306	12.2967	3.83075	5.04834	4.98895	6.40812	0.901327	0.0428955	0.0853488	10.5546	5.06904
AI846148	241.82	222.881	166.006	254.745	288.765	235.728	288.365	-0.360704	0.0396814	0.0799573	210.236	266.901
AI847159	0	0	0	0	0	1.24724	1.83089	-0.259751	0.61473	0.717784	0	0.769532
AI854703	17.8183	8.379	4.61128	4.78844	0	0	0.915446	1.74552	0.0013359	0.00409629	10.2695	1.42597
AI987944	183.274	150.822	175.229	212.607	218.088	174.613	159.288	-0.168531	0.295971	0.414313	169.775	191.149
Aicda	0	1.6758	1.53709	1.91537	0	0	0	0.353897	0.491938	0.608674	1.07096	0.478844
Aida	264.729	350.242	305.882	284.433	238.282	295.595	319.491	0.126332	0.345748	0.467361	306.951	284.45
Aif1	71.2733	82.1142	135.264	71.8265	44.4254	28.6865	59.504	0.890379	0.0013729	0.00419525	96.2172	51.1106
Aif1l	89.0916	150.822	73.7805	37.3498	35.3384	19.9558	45.7723	1.46075	2.05454e-06	1.14313e-05	104.565	34.6041
Aifm1	264.729	343.539	318.178	734.546	709.797	753.331	422.021	-1.03748	3.79645e-12	5.04885e-11	308.816	654.924
Aifm2	616.005	878.119	499.555	316.037	252.417	213.278	297.52	1.24032	1.16739e-12	1.64361e-11	664.56	269.813
Aifm3	35.6366	15.0822	33.8161	17.2384	28.2707	24.9447	21.9707	0.214507	0.527397	0.641153	28.1783	23.1061
Aig1	114.546	83.79	107.597	195.368	182.75	228.244	183.089	-0.945748	8.12585e-08	5.74538e-07	101.978	197.363
Aim1	1550.19	1793.11	1555.54	1224.88	1270.16	1707.47	1589.21	0.169858	0.284528	0.402254	1632.95	1447.93
Aim1l	50.9095	25.137	47.6499	18.1961	22.2127	24.9447	17.3935	0.884515	0.00552548	0.0144625	41.2321	20.6867
Aim2	56.0004	50.274	59.9467	34.4767	27.2611	33.6754	40.2796	0.664825	0.0406452	0.0815753	55.407	33.9232
Aimp1	282.548	365.324	382.736	628.243	511.902	535.065	492.51	-0.630228	8.22619e-07	4.89272e-06	343.536	541.93
Aimp2	104.364	157.525	184.451	275.814	282.707	324.282	241.678	-0.873359	3.72274e-11	4.34254e-10	148.78	281.12
Aip	168.001	209.475	216.73	194.41	204.963	228.244	218.792	-0.101377	0.513549	0.628861	198.069	211.602
Aipl1	2.54547	1.6758	3.07419	0	0	0	0	1.09208	0.0460747	0.0906985	2.43182	0
Aire	25.4547	0	18.4451	0	0	0	0.915446	2.53145	1.15181e-05	5.54328e-05	14.6333	0.228861
Airn	371.639	248.018	166.006	257.618	203.953	134.702	288.365	0.196592	0.577353	0.685733	261.888	221.16
Ajap1	0	1.6758	0	0	1.00967	0	0.915446	0.0635945	0.891348	NA	0.5586	0.481279
Ajuba	310.548	522.85	282.825	169.511	237.272	187.086	254.494	0.790239	4.02167e-06	2.12692e-05	372.074	212.091
AK010878	63.6369	56.9772	43.0386	63.2073	54.5221	59.8674	55.8422	-0.114444	0.588811	0.695018	54.5509	58.3598
Ak1	267.275	460.845	459.591	60.3343	60.5801	67.3508	87.8828	2.21106	6.33544e-09	5.32321e-08	395.904	69.037
Ak2	1038.55	1176.41	1062.13	1550.5	1559.94	2052.95	1080.23	-0.491287	0.00121386	0.00376173	1092.37	1560.9
Ak3	827.279	1226.69	1088.26	1882.81	1637.68	1904.53	1633.16	-0.729942	3.68938e-09	3.18896e-08	1047.41	1764.55
Ak4	45.8185	88.8174	84.5402	45.0113	52.5028	46.1478	43.026	0.647896	0.0220299	0.0482387	73.0587	46.672
Ak5	15.2728	23.4612	23.0564	8.61918	8.07735	4.98895	10.0699	1.24078	0.000681448	0.00224169	20.5968	7.93885
Ak6	53.455	73.7352	79.9289	169.511	176.692	187.086	140.063	-1.21099	9.81586e-12	1.24124e-10	69.0397	168.338
Ak7	5.09095	5.0274	10.7597	2.87306	3.02901	2.49447	1.83089	1.06827	0.0414365	0.0828823	6.95933	2.55686
Ak8	2.54547	3.3516	3.07419	0.957687	0	3.74171	5.49268	0.189978	0.735946	0.816777	2.99042	2.54802
Akap1	1153.1	940.124	917.645	1720.96	1762.88	1547.82	1973.7	-0.807674	1.16159e-06	6.76827e-06	1003.62	1751.34
Akap10	677.096	534.58	528.76	700.069	578.54	641.08	576.731	-0.116274	0.209286	0.316173	580.146	624.105
Akap11	1430.56	1328.91	1278.86	1396.31	1307.52	1169.91	1164.45	0.0966095	0.345632	0.467246	1346.11	1259.55
Akap12	684.733	1095.97	636.357	694.323	760.281	732.128	807.423	0.0849178	0.550532	0.66198	805.688	748.539
Akap13	2357.11	2320.98	1936.74	1181.79	1179.29	937.923	1288.03	0.935871	5.31446e-14	8.59316e-13	2204.94	1146.76
Akap14	2.54547	6.7032	4.61128	5.74612	1.00967	6.23619	3.66178	0.0613644	0.910029	0.939395	4.61999	4.16344
Akap17b	292.73	187.69	245.935	263.364	293.814	304.326	231.608	-0.193713	0.165994	0.261751	242.118	273.278
Akap2	7.63642	5.0274	4.61128	1.91537	1.00967	2.49447	1.83089	0.887548	0.123823	0.206306	5.75837	1.8126
Akap3	0	0	1.53709	0	0	0	0.915446	0.209429	0.634255	NA	0.512365	0.228861
Akap5	35.6366	51.9498	53.7983	50.7574	33.3191	37.4171	38.4487	0.2177	0.531574	0.644857	47.1282	39.9856
Akap6	165.456	88.8174	84.5402	21.0691	28.2707	19.9558	47.6032	1.71891	3.76201e-06	2.00092e-05	112.938	29.2247
Akap7	389.458	385.434	345.846	150.357	141.354	130.96	164.78	1.33141	3.09513e-21	1.02332e-19	373.579	146.863
Akap8	2553.11	1263.55	1495.59	1218.18	1297.42	1138.73	1238.6	0.499871	0.000473939	0.00161318	1770.75	1223.23
Akap8l	1328.74	613.343	680.933	396.482	390.742	359.204	432.09	1.09988	2.56943e-09	2.27974e-08	874.338	394.63
Akap9	4113.49	3163.91	2908.18	3208.25	2837.17	2791.32	3162.87	0.168931	0.202653	0.307794	3395.19	2999.9
Akip1	61.0914	75.411	101.448	67.0381	44.4254	89.8011	100.699	0.0905391	0.709462	0.795943	79.3169	75.4909
Akirin1	129.819	323.429	295.122	465.436	424.061	461.478	433.921	-0.780053	0.000108522	0.000427966	249.457	446.224
Akirin2	269.82	326.781	328.938	312.206	285.736	308.068	345.123	-0.0026087	0.984006	0.990196	308.513	312.783
Akna	491.277	313.375	385.811	156.103	168.615	169.624	233.439	1.056	0.000219639	0.000809019	396.821	181.945
Aknad1	2.54547	10.0548	1.53709	4.78844	5.04834	1.24724	4.57723	0.177123	0.740739	0.820456	4.71246	3.91531
Akr1a1	1702.92	2434.94	2136.56	2743.77	2845.25	2833.72	2724.37	-0.414106	2.91059e-05	0.00012951	2091.47	2786.78
Akr1b10	188.365	155.849	204.433	369.667	351.365	446.511	221.538	-0.893299	7.05287e-08	5.02878e-07	182.883	347.27
Akr1b7	5.09095	0	0	0	0	0	0	0.26559	0.435349	NA	1.69698	0
Akr1b8	81.4552	105.575	104.522	69.9112	125.199	124.724	84.221	-0.0376872	0.883589	0.920642	97.1843	101.014
Akr1c12	5.09095	6.7032	3.07419	0	0	4.98895	1.83089	1.03176	0.0618093	0.115707	4.95611	1.70496
Akr1c13	28.0002	26.8128	24.5935	18.1961	8.07735	13.7196	11.9008	0.946528	0.00664084	0.0169667	26.4688	12.9735
Akr1c14	86.5461	68.7078	107.597	166.638	129.238	96.0373	112.6	-0.475951	0.0468687	0.0920268	87.6168	126.128
Akr1c18	10.1819	33.516	26.1306	31.6037	20.1934	19.9558	23.8016	-0.0154117	0.968796	0.980058	23.2762	23.8886
Akr1c19	5.09095	3.3516	1.53709	0.957687	1.00967	1.24724	0	1.00539	0.0805874	0.144325	3.32655	0.803648
Akr1c21	10.1819	5.0274	7.68547	3.83075	3.02901	0	5.49268	0.820702	0.132269	0.217556	7.63159	3.08811
Akr1cl	12.7274	21.7854	18.4451	22.9845	54.5221	12.4724	42.1105	-0.54899	0.309169	0.429028	17.6526	33.0224
Akr1e1	196.002	202.772	230.564	235.591	190.827	213.278	201.398	0.0138793	0.923594	0.948764	209.779	210.274
Akr7a5	104.364	191.041	159.858	192.495	221.117	222.008	229.777	-0.514987	0.00177277	0.00527551	151.754	216.349
Akt1	1326.19	1496.49	1618.56	5089.15	5569.33	7088.05	3572.07	-1.79291	4.65341e-36	4.72095e-34	1480.41	5329.65
Akt1s1	180.729	211.151	247.472	248.999	311.988	390.385	311.252	-0.553539	9.71218e-06	4.74622e-05	213.117	315.656
Akt2	824.734	1052.4	945.313	597.597	583.589	476.445	640.812	0.689178	1.30019e-06	7.48493e-06	940.816	574.611
Akt3	687.278	718.918	542.594	360.09	342.278	311.809	411.951	0.866944	8.79039e-19	2.30524e-17	649.597	356.532
Aktip	346.185	336.836	361.217	452.986	387.713	419.072	560.253	-0.384149	0.00683546	0.0174088	348.079	455.006
Alad	318.184	335.16	350.457	302.629	344.297	407.847	303.013	-0.0149684	0.942878	0.962282	334.601	339.446
Alas1	633.823	728.973	662.487	838.934	850.141	760.815	752.497	-0.240359	0.0809293	0.144841	675.095	800.597
Alas2	132.365	196.069	135.264	217.395	122.17	185.838	151.049	-0.132295	0.561856	0.672092	154.566	169.113
Alb	25.4547	26.8128	23.0564	32.5614	19.1837	12.4724	27.4634	0.167753	0.685872	0.77694	25.108	22.9202
Alcam	952.007	1261.88	820.808	268.152	310.978	298.09	209.637	1.84233	5.20027e-33	4.15881e-31	1011.56	271.714
Aldh16a1	269.82	263.101	278.214	174.299	300.881	387.891	268.226	-0.0345545	0.835299	0.888901	270.378	282.824
Aldh18a1	651.641	564.745	893.051	4780.77	5272.49	4533.71	1996.59	-2.48669	6.32764e-48	1.33739e-45	703.146	4145.89
Aldh1a1	272.366	353.594	362.754	195.368	145.392	165.883	124.501	1.02586	2.03238e-05	9.3334e-05	329.571	157.786
Aldh1a2	0	11.7306	12.2967	8.61918	4.03868	4.98895	20.1398	-0.0866279	0.85938	0.904747	8.00912	9.44665
Aldh1a3	94.1826	1057.43	141.413	252.829	538.154	256.931	672.853	-0.0395856	0.92939	0.952591	431.008	430.192
Aldh1a7	147.638	412.247	253.62	129.288	92.8895	68.5981	62.2503	1.44194	5.65935e-06	2.90982e-05	271.168	88.2564
Aldh1b1	2.54547	16.758	9.22256	6.70381	7.06768	11.2251	11.9008	0.105276	0.822448	0.879623	9.50868	9.22436
Aldh1l1	595.641	757.462	648.654	667.508	704.749	752.084	218.792	0.139976	0.627805	0.729434	667.252	585.783
Aldh1l2	106.91	129.037	110.671	346.683	342.278	395.374	236.185	-1.46537	3.1868e-14	5.31254e-13	115.539	330.13
Aldh2	890.916	1694.23	1532.48	1350.34	1595.28	1727.42	1163.53	-0.103979	0.474361	0.592251	1372.54	1459.14
Aldh3a1	5.09095	8.379	18.4451	1.91537	0	0	1.83089	2.15043	0.000146801	0.000561041	10.6384	0.936566
Aldh3a2	511.64	737.352	465.739	762.319	686.575	931.686	519.973	-0.320046	0.0784717	0.141211	571.577	725.138
Aldh3b1	50.9095	77.0868	70.7063	55.5459	56.5415	61.1146	54.0113	0.229919	0.263646	0.379011	66.2342	56.8033
Aldh3b2	56.0004	35.1918	32.279	15.323	20.1934	23.6975	11.9008	1.11108	0.000160271	0.000607485	41.1571	17.7787
Aldh3b3	0	3.3516	0	0	0	0	0	0.692241	0.171086	0.268398	1.1172	0
Aldh4a1	333.457	507.767	476.499	581.316	605.801	578.718	331.391	-0.254736	0.293673	0.411893	439.241	524.307
Aldh5a1	229.093	234.612	175.229	179.087	155.489	185.838	127.247	0.388176	0.023618	0.0512671	212.978	161.915
Aldh6a1	1550.19	1871.87	1272.71	2089.67	1645.76	1277.17	1055.51	0.0589645	0.750711	0.828246	1564.93	1517.03
Aldh7a1	715.278	834.548	677.858	879.157	918.799	835.649	603.279	-0.126504	0.314226	0.434383	742.562	809.221
Aldh8a1	0	3.3516	0	2.87306	0	0	0	0.13465	0.776974	NA	1.1172	0.718265
Aldh9a1	476.004	469.224	405.793	1298.62	1205.54	1100.06	1127.83	-1.36875	5.26438e-18	1.27683e-16	450.34	1183.02
Aldoa	3472.03	8554.96	6689.43	3965.78	4421.34	4377.8	3480.53	0.53736	0.0352973	0.0724473	6238.81	4061.36
Aldoart1	5.09095	5.0274	1.53709	0	0	0	0.915446	1.34574	0.0148943	0.034409	3.88515	0.228861
Aldob	2.54547	0	0	0.957687	1.00967	0	1.83089	-0.0869226	0.873876	0.914833	0.848491	0.949562
Aldoc	860.37	487.658	1177.41	10414.8	10141.1	12622	3130.82	-3.25177	3.80589e-37	4.24967e-35	841.814	9077.21
Alg1	137.456	160.877	167.543	222.183	259.485	245.706	203.229	-0.576979	7.3195e-05	0.000299356	155.292	232.651
Alg10b	470.913	517.822	499.555	680.916	728.981	722.15	602.363	-0.449105	1.4435e-06	8.24846e-06	496.097	683.603
Alg11	313.093	304.996	321.253	1011.32	936.973	773.287	638.981	-1.3945	6.73148e-29	4.1069e-27	313.114	840.14
Alg12	140.001	105.575	110.671	230.803	239.292	203.3	234.354	-0.948607	7.77938e-09	6.43898e-08	118.749	226.937
Alg13	224.002	137.416	179.84	184.834	147.412	187.086	117.177	0.161815	0.37868	0.499789	180.419	159.127
Alg14	112.001	159.201	122.967	309.333	288.765	342.99	209.637	-1.06789	2.40707e-09	2.14857e-08	131.39	287.681
Alg2	221.456	216.178	218.267	483.632	430.119	354.215	376.248	-0.897844	3.68494e-09	3.18668e-08	218.634	411.054
Alg3	78.9097	60.3288	69.1692	227.93	224.146	236.975	114.431	-1.48314	6.59753e-11	7.43227e-10	69.4692	200.87
Alg5	185.82	221.206	238.25	742.207	642.149	654.8	469.624	-1.50189	2.95996e-30	1.93915e-28	215.092	627.195
Alg6	140.001	144.119	205.971	165.68	152.46	208.289	112.6	0.0541166	0.782225	0.850221	163.363	159.757
Alg8	150.183	100.548	166.006	248.041	265.543	290.606	170.273	-0.794443	1.25633e-05	6.00723e-05	138.912	243.616
Alg9	282.548	273.155	258.232	613.877	545.221	651.058	429.344	-1.03103	8.32325e-16	1.63283e-14	271.312	559.875
Alk	2.54547	21.7854	3.07419	0.957687	2.01934	2.49447	3.66178	1.32279	0.0180779	0.0406376	9.13502	2.28332
Alkbh1	308.002	288.238	304.345	248.041	270.591	188.333	288.365	0.260197	0.124723	0.20747	300.195	248.833
Alkbh2	68.7278	41.895	69.1692	45.969	59.5705	76.0815	67.743	-0.0678932	0.809645	0.869854	59.9307	62.341
Alkbh3	257.093	182.662	204.433	349.556	281.698	342.99	270.057	-0.55452	1.74169e-05	8.10111e-05	214.73	311.075
Alkbh4	63.6369	46.9224	43.0386	71.8265	72.6962	63.6091	60.4194	-0.423719	0.0529283	0.101731	51.1993	67.1378
Alkbh5	985.099	1156.3	971.443	1563.9	1542.77	1652.59	1485.77	-0.581446	1.33947e-12	1.874e-11	1037.61	1561.26
Alkbh6	96.728	105.575	112.208	110.134	129.238	99.779	116.262	-0.12921	0.450428	0.57084	104.837	113.853
Alkbh7	28.0002	56.9772	58.4096	47.8844	36.3481	68.5981	29.2943	0.101711	0.724471	0.80783	47.7957	45.5312
Alkbh8	267.275	222.881	207.508	268.152	185.779	157.152	205.975	0.178142	0.248653	0.361673	232.555	204.265
Allc	5.09095	0	0	0	1.00967	0	3.66178	-0.0691698	0.883204	0.92044	1.69698	1.16786
Alms1	679.642	553.014	622.523	484.59	414.974	698.453	389.98	0.300311	0.0879208	0.155338	618.393	496.999
Alms1-ps2	5.09095	0	0	3.83075	7.06768	6.23619	7.32357	-1.33174	0.0152555	0.0351201	1.69698	6.11455
Alox12	61.0914	36.8676	36.8902	20.1114	15.145	22.4503	19.2244	1.10999	0.000161442	0.000611394	44.9497	19.2328
Alox12e	129.819	28.4886	58.4096	16.2807	9.08702	22.4503	39.3642	1.31947	0.00809805	0.020213	72.2391	21.7955
Alox15	7.63642	15.0822	12.2967	33.519	22.2127	46.1478	35.7024	-1.09461	0.011287	0.0270693	11.6718	34.3955
Alox5	40.7276	48.5982	46.1128	36.3921	28.2707	23.6975	46.6877	0.377769	0.170468	0.26757	45.1462	33.762
Alox5ap	22.9093	60.3288	66.095	65.1227	52.5028	61.1146	66.8276	-0.238953	0.431721	0.552564	49.7777	61.3919
Alox8	0	8.379	6.14837	2.87306	1.00967	3.74171	0.915446	0.94508	0.0762902	0.137774	4.84246	2.13497
Aloxe3	7.63642	5.0274	6.14837	1.91537	2.01934	1.24724	4.57723	0.827796	0.137599	0.224688	6.27073	2.43979
Alpk1	211.274	147.47	179.84	85.2341	71.6865	79.8232	88.7983	1.1097	3.22777e-09	2.81878e-08	179.528	81.3855
Alpk2	58.5459	30.1644	27.6677	0.957687	0	0	0.915446	2.42979	2.40085e-05	0.000108903	38.7927	0.468283
Alpk3	185.82	113.954	167.543	10.5346	0	1.24724	1.83089	2.24059	8.73431e-05	0.000351232	155.772	3.40317
Alpl	208.729	281.534	258.232	535.347	568.444	467.714	491.594	-1.02319	4.11566e-11	4.76643e-10	249.498	515.775
Alppl2	0	0	1.53709	1.91537	1.00967	6.23619	0	-0.227995	0.387742	NA	0.512365	2.29031
Als2	465.822	415.598	324.327	374.456	392.761	422.813	368.925	0.0275013	0.794958	0.859805	401.916	389.739
Als2cl	1298.19	594.909	691.692	229.845	269.582	253.189	562.084	1.34744	9.61906e-08	6.73144e-07	861.598	328.675
Als2cr12	20.3638	51.9498	12.2967	12.4499	13.1257	6.23619	8.23901	1.22969	0.00206697	0.00605442	28.2034	10.0127
Alx3	0	3.3516	0	0	1.00967	0	1.83089	0.18739	0.709577	0.795971	1.1172	0.71014
Alx4	76.3642	318.402	201.359	60.3343	87.8412	54.8784	101.614	1.31624	3.43974e-07	2.18573e-06	198.709	76.1671
Alyref	323.275	415.598	468.814	466.394	512.912	732.128	400.05	-0.363338	0.0320325	0.0667259	402.562	527.871
Alyref2	28.0002	16.758	27.6677	18.1961	23.2224	23.6975	23.8016	0.092863	0.757031	0.832611	24.142	22.2294
Amacr	56.0004	88.8174	99.9111	113.007	95.9185	147.174	86.0519	-0.383156	0.067295	0.124143	81.5763	110.538
Ambra1	941.826	718.918	662.487	629.2	644.169	564.999	705.809	0.269769	0.0395945	0.0798184	774.41	636.044
Amdhd1	0	0	1.53709	0	0	0	0	0.387889	0.395183	NA	0.512365	0
Amdhd2	150.183	177.635	201.359	116.838	144.383	178.355	447.653	-0.330539	0.280927	0.398432	176.392	221.807
Amelx	15.2728	13.4064	19.9822	4.78844	4.03868	2.49447	9.15446	1.30462	0.00816056	0.0203458	16.2205	5.11901
Amer1	748.369	581.503	633.283	563.12	502.815	641.08	454.977	0.269171	0.0346321	0.0712578	654.385	540.498
Amer2	12.7274	18.4338	9.22256	1.91537	0	2.49447	4.57723	1.95874	3.7506e-05	0.000163007	13.4612	2.24677
Amfr	1117.46	1243.44	1191.25	1720.96	1687.16	1648.85	1500.42	-0.464268	1.23107e-06	7.13096e-06	1184.05	1639.35
Amh	2.54547	6.7032	1.53709	1.91537	1.00967	2.49447	2.74634	0.478809	0.397198	0.518367	3.59526	2.04146
Amhr2	2.54547	6.7032	3.07419	0.957687	1.00967	2.49447	4.57723	0.565322	0.310138	0.430058	4.10762	2.25977
Amica1	10.1819	20.1096	19.9822	20.1114	14.1354	4.98895	13.7317	0.35225	0.420223	0.540861	16.7579	13.2419
Amigo1	361.457	251.37	259.769	200.157	212.03	204.547	235.27	0.418612	0.00247332	0.00710768	290.865	213.001
Amigo2	168.001	142.443	190.6	478.844	398.819	434.039	843.126	-1.62458	1.34227e-09	1.24053e-08	167.015	538.707
Amigo3	86.5461	56.9772	87.6143	242.295	293.814	189.58	165.696	-1.45929	1.77224e-06	9.97918e-06	77.0459	222.846
Ammecr1	188.365	196.069	224.416	714.435	728.981	671.014	473.286	-1.62468	1.39574e-25	6.41968e-24	202.95	646.929
Ammecr1l	847.643	827.845	763.936	1090.81	1002.6	930.439	1111.35	-0.345927	0.000690195	0.00226921	813.141	1033.8
Amn	2.54547	11.7306	7.68547	1.91537	3.02901	0	3.66178	1.19146	0.0306426	0.064268	7.32051	2.15154
Amn1	78.9097	88.8174	93.7627	94.811	57.5511	54.8784	67.743	0.360098	0.0515549	0.0996306	87.1633	68.7459
Amot	435.276	449.114	367.365	391.694	381.655	567.493	500.749	-0.134871	0.481624	0.599253	417.252	460.398
Amotl1	3810.58	3770.55	3284.77	3211.12	3561.1	3493.51	3559.25	0.0655931	0.308285	0.428069	3621.96	3456.25
Amotl2	1326.19	1233.39	751.639	283.475	491.709	435.286	482.44	1.36667	2.02171e-15	3.81035e-14	1103.74	423.227
Ampd1	99.2735	239.639	229.027	0.957687	2.01934	1.24724	0	1.71592	0.00138362	0.00422438	189.313	1.05607
Ampd2	519.277	432.356	518.001	395.525	499.786	375.418	377.164	0.24187	0.101004	0.174286	489.878	411.973
Ampd3	285.093	253.046	201.359	93.8533	123.18	98.5318	128.162	1.11749	1.67274e-11	2.04671e-10	246.499	110.932
Amph	15.2728	8.379	9.22256	4.78844	9.08702	6.23619	3.66178	0.678916	0.144589	0.233876	10.9581	5.94336
Amt	239.275	191.041	261.306	405.102	411.945	435.286	354.278	-0.79431	3.15365e-06	1.69872e-05	230.541	401.652
Amtn	0	0	0	0.957687	0	1.24724	0	-0.019317	0.926224	NA	0	0.551231
Amy1	740.733	899.905	610.226	412.763	236.263	162.141	241.678	1.43172	2.95699e-08	2.22545e-07	750.288	263.211
Amz1	84.0007	35.1918	69.1692	22.9845	37.3577	38.6644	25.6325	0.952485	0.000176165	0.000662917	62.7872	31.1598
Amz2	399.639	460.845	438.072	446.282	437.187	375.418	412.866	0.0557931	0.613575	0.716766	432.852	417.938
Anapc1	2107.65	2349.47	2075.08	2096.38	1956.74	2225.07	1836.38	0.104209	0.181713	0.282399	2177.4	2028.64
Anapc10	117.092	80.4384	115.282	108.219	103.996	91.0483	103.445	0.027659	0.869725	0.912163	104.271	101.677
Anapc11	109.455	157.525	193.674	108.219	98.9475	148.421	148.302	0.304362	0.0490062	0.0955895	153.551	125.972
Anapc13	96.728	162.553	159.858	215.48	220.108	248.2	156.541	-0.552969	0.000554328	0.00186287	139.713	210.082
Anapc15	272.366	98.8722	132.19	319.867	261.504	409.094	236.185	-0.856249	0.000124307	0.000482816	167.809	306.663
Anapc16	185.82	221.206	207.508	334.233	326.123	340.496	304.843	-0.656254	2.70969e-08	2.05238e-07	204.844	326.424
Anapc2	832.37	640.156	581.021	442.451	470.506	470.208	561.168	0.482157	0.000330941	0.00116694	684.516	486.083
Anapc4	684.733	702.16	684.007	829.357	850.141	840.638	790.945	-0.255849	0.00135597	0.00414994	690.3	827.77
Anapc5	2369.84	2039.45	2219.56	2406.67	2671.58	3577.08	2209.89	-0.286115	0.00419844	0.0113161	2209.62	2716.3
Anapc7	379.276	353.594	298.196	336.148	356.413	396.621	390.895	-0.120425	0.271418	0.387552	343.689	370.02
Ang	48.364	40.2192	47.6499	38.3075	29.2804	21.203	30.2097	0.571396	0.034757	0.071487	45.411	29.7502
Angel1	127.274	87.1416	104.522	134.076	143.373	172.119	162.949	-0.539206	0.00609072	0.0157333	106.313	153.129
Angel2	532.004	455.818	464.202	530.559	428.1	451.5	450.399	0.0524331	0.580014	0.687924	484.008	465.139
Angpt1	493.822	175.959	305.882	4036.65	3497.49	3285.22	1395.14	-3.03505	3.18257e-29	1.96876e-27	325.221	3053.63
Angpt2	190.911	346.891	267.454	207.818	227.175	197.064	190.413	0.35922	0.169693	0.266613	268.418	205.617
Angpt4	5.09095	1.6758	6.14837	0.957687	3.02901	0	4.57723	0.545577	0.337033	0.458168	4.30504	2.14098
Angptl1	28.0002	26.8128	27.6677	15.323	10.0967	7.48342	16.478	1.01108	0.00883961	0.0218121	27.4936	12.3453
Angptl2	733.097	1731.1	1836.83	934.703	848.122	799.479	706.724	0.748382	0.0030474	0.00854581	1433.68	822.257
Angptl3	35.6366	28.4886	50.7241	22.0268	21.203	22.4503	28.3788	0.627512	0.10122	0.174604	38.2831	23.5147
Angptl4	1700.38	1881.92	201.359	868.622	605.801	527.581	4824.4	-0.306636	0.525676	0.639675	1261.22	1706.6
Angptl6	7.63642	5.0274	7.68547	5.74612	11.1064	12.4724	9.15446	-0.488716	0.309357	0.429222	6.7831	9.61983
Angptl7	38.1821	35.1918	30.7419	25.8576	35.3384	24.9447	35.7024	0.1193	0.770687	0.84238	34.7053	30.4608
Ank	285.093	568.096	393.496	179.087	182.75	144.68	158.372	1.2692	8.20773e-11	9.09045e-10	415.562	166.222
Ank1	71.2733	70.3836	70.7063	14.3653	7.06768	12.4724	11.9008	2.1377	2.46428e-06	1.35761e-05	70.7877	11.4515
Ank2	231.638	283.21	262.843	154.188	174.673	132.207	117.177	0.825825	1.30977e-05	6.23591e-05	259.23	144.561
Ank3	1125.1	1089.27	854.624	749.869	728.981	626.113	698.485	0.525462	0.00859666	0.0212926	1023	700.862
Ankdd1b	25.4547	31.8402	23.0564	25.8576	18.174	33.6754	32.9561	-0.0292449	0.923497	0.948719	26.7838	27.6658
Ankef1	140.001	130.712	46.1128	26.8152	14.1354	7.48342	17.3935	2.41242	1.26301e-15	2.42415e-14	105.609	16.4569
Ankfn1	10.1819	6.7032	7.68547	1.91537	2.01934	0	1.83089	1.444	0.0123638	0.0293066	8.19019	1.4414
Ankfy1	1341.46	1468	1424.89	1316.82	1163.14	1115.03	1331.06	0.200858	0.0103319	0.0250385	1411.45	1231.51
Ankhd1	2835.66	1902.03	2130.41	2589.59	2335.36	2276.21	2392.98	-0.0808033	0.500415	0.616328	2289.37	2398.53
Ankib1	855.279	836.224	806.974	1021.85	1029.86	991.554	984.104	-0.273241	0.0002851	0.00102318	832.826	1006.84
Ankk1	2.54547	0	0	0.957687	1.00967	4.98895	0	-0.474111	0.346184	0.467708	0.848491	1.73908
Ankle1	76.3642	75.411	130.653	27.7729	39.3771	138.443	21.9707	0.627016	0.125276	0.208176	94.1427	56.891
Ankle2	677.096	802.708	830.031	752.742	744.126	835.649	899.883	-0.0590437	0.594706	0.700485	769.945	808.1
Ankmy1	2.54547	3.3516	1.53709	2.87306	4.03868	4.98895	5.49268	-0.523618	0.327405	0.448583	2.47806	4.34834
Ankmy2	320.73	367	302.807	334.233	332.181	344.238	308.505	0.00790846	0.956325	0.971705	330.179	329.789
Ankra2	170.547	120.658	144.487	139.822	114.093	115.993	157.457	0.121223	0.378741	0.499789	145.23	131.841
Ankrd1	5.09095	23.4612	1.53709	0	2.01934	1.24724	2.74634	1.41266	0.0138431	0.0322704	10.0297	1.50323
Ankrd10	684.733	537.932	574.873	404.144	440.216	360.452	422.936	0.543744	2.19018e-06	1.21438e-05	599.179	406.937
Ankrd11	2861.11	2470.13	2198.04	1901.01	1998.13	2165.2	2348.12	0.25087	0.0506771	0.0982443	2509.76	2103.12
Ankrd12	1122.55	739.028	965.295	611.004	476.564	463.972	667.36	0.748075	4.55362e-09	3.89427e-08	942.292	554.725
Ankrd13a	700.005	911.635	845.402	1689.36	1672.01	1998.07	1385.07	-1.02221	1.05359e-22	3.96303e-21	819.014	1686.13
Ankrd13b	325.821	293.265	229.027	91.938	150.441	117.24	138.232	1.14855	4.23856e-08	3.11858e-07	282.704	124.463
Ankrd13c	315.639	368.676	391.959	517.151	432.138	455.242	424.767	-0.325342	0.00143028	0.00435113	358.758	457.324
Ankrd13d	160.365	70.3836	136.801	36.3921	68.6575	71.0925	74.1511	0.904545	0.000859337	0.00276079	122.517	62.5733
Ankrd16	407.276	216.178	245.935	130.245	167.605	162.141	191.328	0.786896	0.00018207	0.000682243	289.796	162.83
Ankrd17	3072.39	2801.94	2659.17	3247.52	2947.22	2783.83	2756.41	-0.044263	0.677418	0.770164	2844.5	2933.75
Ankrd2	30.5457	3.3516	13.8338	11.4922	16.1547	1.24724	16.478	0.186069	0.746749	0.824694	15.9104	11.3431
Ankrd22	56.0004	8.379	79.9289	198.241	139.334	339.249	324.068	-2.25772	3.11687e-09	2.72999e-08	48.1028	250.223
Ankrd23	526.913	227.909	173.692	120.669	99.9572	78.576	83.3056	1.16366	0.0313312	0.0654724	309.505	95.6268
Ankrd24	269.82	147.47	192.137	177.172	159.528	154.657	190.413	0.225093	0.250372	0.363638	203.142	170.442
Ankrd26	351.275	259.749	267.454	225.056	244.34	253.189	163.865	0.381055	0.0250323	0.0539022	292.826	221.613
Ankrd27	738.188	695.457	574.873	455.859	497.767	357.957	511.734	0.538272	1.78672e-06	1.00448e-05	669.506	455.829
Ankrd28	710.187	623.398	691.692	792.965	754.223	888.033	661.867	-0.194919	0.0610784	0.114592	675.092	774.272
Ankrd29	25.4547	40.2192	18.4451	26.8152	37.3577	27.4392	31.1252	-0.095282	0.763817	0.837293	28.0397	30.6843
Ankrd32	297.82	251.37	285.899	224.099	217.079	268.156	124.501	0.406837	0.0292827	0.061766	278.363	208.459
Ankrd33b	252.002	217.854	144.487	517.151	348.336	366.688	337.8	-0.875065	0.00123424	0.00381705	204.781	392.494
Ankrd34a	7.63642	6.7032	10.7597	1.91537	5.04834	3.74171	6.40812	0.67984	0.191586	0.294343	8.36643	4.27839
Ankrd34b	7.63642	0	4.61128	4.78844	5.04834	1.24724	1.83089	0.0734815	0.89746	0.930143	4.08257	3.22873
Ankrd35	30.5457	31.8402	27.6677	20.1114	25.2417	22.4503	16.478	0.463222	0.148231	0.238573	30.0179	21.0704
Ankrd36	0	0	1.53709	2.87306	1.00967	0	0	-0.150344	0.747851	NA	0.512365	0.970683
Ankrd37	20.3638	11.7306	13.8338	11.4922	12.116	4.98895	12.8162	0.41948	0.343758	0.46528	15.3094	10.3534
Ankrd39	76.3642	62.0046	87.6143	63.2073	73.7058	57.3729	89.7137	0.069313	0.762892	0.836692	75.3277	70.9999
Ankrd40	666.914	901.58	625.597	773.811	700.71	747.095	646.305	0.0259616	0.862515	0.906797	731.364	716.98
Ankrd42	185.82	117.306	138.338	42.1382	44.4254	47.395	91.5446	1.32015	3.08466e-10	3.1583e-09	147.155	56.3758
Ankrd44	516.731	497.713	401.181	243.253	253.427	231.986	292.027	0.86582	1.00562e-06	5.91378e-06	471.875	255.173
Ankrd45	0	0	0	0.957687	3.02901	2.49447	0	-0.650551	0.234763	0.345833	0	1.62029
Ankrd46	379.276	454.142	371.977	457.774	449.303	394.127	374.417	-0.0587055	0.606941	0.711073	401.798	418.905
Ankrd49	190.911	189.365	210.582	315.079	320.065	355.463	224.284	-0.595847	0.000144159	0.000552191	196.953	303.723
Ankrd50	320.73	385.434	279.751	265.279	253.427	240.717	266.395	0.35273	0.000367397	0.0012835	328.638	256.454
Ankrd52	926.553	889.85	796.215	514.278	610.85	556.268	727.779	0.51738	0.00747408	0.0188407	870.872	602.294
Ankrd53	12.7274	11.7306	10.7597	5.74612	6.05801	2.49447	7.32357	0.853772	0.0693122	0.127322	11.7392	5.40554
Ankrd54	170.547	157.525	159.858	214.522	296.843	306.82	204.144	-0.648851	5.57353e-06	2.87068e-05	162.643	255.582
Ankrd55	7.63642	1.6758	7.68547	0	3.02901	0	0.915446	1.30266	0.0234943	0.0510361	5.6659	0.986113
Ankrd6	99.2735	137.416	86.0772	36.3921	38.3674	37.4171	27.4634	1.55117	2.46058e-11	2.94374e-10	107.589	34.91
Ankrd61	48.364	18.4338	16.908	17.2384	23.2224	9.9779	26.5479	0.365865	0.362696	0.484158	27.9019	19.2466
Ankrd63	0	10.0548	1.53709	1.91537	3.02901	2.49447	1.83089	0.56465	0.303856	0.423144	3.86396	2.31744
Ankrd66	0	1.6758	0	0	0	0	0	0.338469	0.435249	NA	0.5586	0
Ankrd9	43.2731	56.9772	87.6143	37.3498	49.4738	74.8342	42.1105	0.320729	0.182288	0.283144	62.6215	50.9421
Anks1	870.552	742.379	833.105	508.532	572.482	531.323	601.448	0.548405	0.000105861	0.000418121	815.345	553.446
Anks1b	12.7274	6.7032	6.14837	4.78844	3.02901	0	3.66178	1.03632	0.0510095	0.0987485	8.52632	2.86981
Anks3	422.549	318.402	368.902	302.629	374.587	275.639	394.557	0.119359	0.480384	0.598088	369.951	336.853
Anks6	50.9095	93.8448	50.7241	39.2652	57.5511	24.9447	55.8422	0.48029	0.0744116	0.134999	65.1595	44.4008
Ankub1	0	0	0	0.957687	2.01934	2.49447	0	-0.617011	0.257384	0.371965	0	1.36787
Ankzf1	414.912	202.772	287.437	284.433	210.011	234.481	233.439	0.289654	0.0938987	0.164293	301.707	240.591
Anln	211.274	418.95	388.885	176.214	277.659	858.099	180.343	-0.121554	0.729157	0.811373	339.703	373.079
Ano1	4630.22	3613.02	3988.76	11766.1	10912.5	11166.5	9314.66	-1.39281	1.46822e-33	1.24127e-31	4077.33	10790
Ano10	549.822	539.608	482.647	808.288	718.884	684.733	777.214	-0.520239	3.32289e-06	1.78447e-05	524.026	747.28
Ano2	7.63642	0	0	0	0	1.24724	2.74634	0.549353	0.338538	0.459808	2.54547	0.998394
Ano3	7.63642	3.3516	15.3709	33.519	27.2611	32.4282	23.8016	-1.41412	9.66296e-05	0.00038552	8.78632	29.2525
Ano4	86.5461	55.3014	50.7241	461.605	301.891	498.895	189.497	-2.33769	6.15083e-18	1.48171e-16	64.1905	362.972
Ano5	99.2735	120.658	118.356	0	0	0	0	1.54417	0.00286466	0.00809086	112.762	0
Ano6	2280.75	1990.85	1632.39	1291.92	1325.7	1169.91	1419.86	0.587399	6.32205e-09	5.31448e-08	1968	1301.85
Ano7	2.54547	0	1.53709	6.70381	3.02901	2.49447	2.74634	-0.873168	0.121468	0.203084	1.36086	3.74341
Ano8	366.548	281.534	244.398	116.838	174.673	157.152	238.931	0.778138	0.000302625	0.00107909	297.494	171.898
Ano9	287.639	118.982	301.27	6.70381	13.1257	13.7196	3.66178	4.153	3.26192e-32	2.43328e-30	235.964	9.30272
Anp32a	784.006	780.923	665.562	1038.13	993.514	1132.49	819.324	-0.411776	0.0136115	0.0318097	743.497	995.866
Anp32b	430.185	296.617	362.754	381.159	338.239	432.791	368.009	-0.0779679	0.577794	0.686072	363.185	380.05
Anp32e	402.185	522.85	464.202	492.251	561.376	578.718	359.77	-0.0985088	0.59463	0.700442	463.079	498.029
Anpep	2153.47	561.393	1992.07	616.75	772.397	545.043	1614.85	0.734902	0.0252808	0.0543688	1568.98	887.259
Antxr1	814.552	1667.42	1095.95	636.862	742.107	496.4	663.698	0.880927	1.36465e-05	6.48326e-05	1192.64	634.767
Antxr2	292.73	621.722	501.093	300.714	314.007	259.425	286.535	0.675314	0.00493365	0.0130578	471.848	290.17
Antxrl	61.0914	3.3516	12.2967	67.0381	59.5705	42.4061	448.568	-1.95207	0.000628132	0.00208251	25.5799	154.396
Anxa1	712.733	1538.38	1328.05	891.607	837.015	844.38	1384.15	0.278301	0.253105	0.366857	1193.06	989.289
Anxa11	180.729	186.014	212.119	131.203	173.663	188.333	204.144	0.139889	0.348875	0.470555	192.954	174.336
Anxa13	0	5.0274	3.07419	1.91537	1.00967	0	0	0.874642	0.127412	0.211093	2.70053	0.731261
Anxa2	1023.28	2634.36	1989	1680.74	1972.89	1455.53	2130.24	0.0278638	0.894007	0.928091	1882.21	1809.85
Anxa3	422.549	648.535	390.422	447.24	347.326	313.057	423.851	0.334302	0.119705	0.200494	487.168	382.868
Anxa4	924.007	1328.91	1029.85	803.499	815.812	685.981	1237.68	0.299733	0.143157	0.231969	1094.26	885.744
Anxa5	1206.55	2401.42	1703.1	1566.78	1706.34	1514.15	2043.28	0.0414252	0.797019	0.861319	1770.36	1707.63
Anxa6	1697.83	3411.93	2139.63	3372.97	3623.7	3078.18	2797.6	-0.436112	0.00755423	0.019013	2416.46	3218.11
Anxa7	666.914	920.014	865.384	1312.99	1308.53	1232.27	1231.27	-0.624482	1.05869e-06	6.21151e-06	817.437	1271.27
Anxa8	150.183	46.9224	70.7063	155.145	109.044	128.465	675.599	-1.37477	0.00288603	0.00814346	89.2706	267.064
Anxa9	45.8185	98.8722	53.7983	29.6883	24.2321	19.9558	48.5186	1.06586	0.000288824	0.0010352	66.163	30.5987
Aoah	66.1823	55.3014	130.653	38.3075	25.2417	34.9226	51.265	1.11249	0.000334361	0.00117759	84.0456	37.4342
Aoc1	0	0	0	0	0	1.24724	0.915446	0.115942	0.83774	0.890453	0	0.540671
Aoc2	71.2733	43.5708	76.8547	55.5459	47.4544	46.1478	52.1804	0.291054	0.379329	0.500343	63.8996	50.3321
Aoc3	2122.93	2956.11	1961.33	1073.57	1059.14	800.726	898.052	1.2373	7.12773e-12	9.16334e-11	2346.79	957.872
Aox1	796.733	574.799	376.588	191.537	164.576	144.68	131.824	1.80539	7.34058e-23	2.82088e-21	582.707	158.154
Aox2	7.63642	10.0548	0	2.87306	1.00967	3.74171	0.915446	0.834584	0.144671	0.233988	5.89707	2.13497
Aox3	58.5459	41.895	79.9289	147.484	190.827	153.41	27.4634	-1.02278	0.00751747	0.0189339	60.1233	129.796
Aox4	2.54547	0	1.53709	0.957687	1.00967	2.49447	2.74634	-0.0143876	0.979844	0.987558	1.36086	1.80204
Ap1ar	366.548	335.16	278.214	365.836	368.529	360.452	329.561	-0.133609	0.2789	0.396263	326.641	356.094
Ap1b1	661.823	683.726	799.289	1378.11	1393.34	1470.49	1009.74	-0.868495	1.07035e-19	3.07989e-18	714.946	1312.92
Ap1g1	1468.74	1431.13	1497.13	3401.7	3124.93	2896.09	2096.37	-0.950644	2.17903e-14	3.69145e-13	1465.67	2879.77
Ap1g2	422.549	184.338	264.38	217.395	245.35	276.887	205.975	0.287098	0.169609	0.266524	290.422	236.402
Ap1m1	280.002	273.155	288.974	507.574	451.322	473.95	386.318	-0.699195	4.55001e-08	3.33529e-07	280.71	454.791
Ap1m2	448.003	367	570.262	1696.06	1456.95	1743.64	1152.55	-1.68559	1.71594e-26	8.46245e-25	461.755	1512.3
Ap1s1	157.819	251.37	239.787	381.159	463.438	512.615	345.123	-0.939828	1.52795e-12	2.11601e-11	216.325	425.584
Ap1s2	147.638	189.365	199.822	201.114	165.586	178.355	197.736	-0.0210648	0.903006	0.934536	178.942	185.698
Ap1s3	66.1823	33.516	52.2612	70.8688	55.5318	62.3619	60.4194	-0.322965	0.211016	0.318191	50.6532	62.2955
Ap2a1	453.094	685.402	627.134	473.097	583.589	602.416	582.224	0.0688731	0.476123	0.593908	588.544	560.331
Ap2a2	995.28	1411.02	1169.73	2181.61	2064.77	2479.51	1775.05	-0.818936	1.85731e-09	1.67981e-08	1192.01	2125.24
Ap2b1	1545.1	1788.08	1630.86	2515.84	2371.71	2156.47	2067.08	-0.454113	2.22947e-06	1.23462e-05	1654.68	2277.78
Ap2m1	463.276	579.827	587.17	1189.45	1158.09	1283.41	885.236	-1.03447	1.02783e-24	4.50572e-23	543.424	1129.05
Ap2s1	183.274	340.187	295.122	627.285	774.416	1026.48	519.058	-1.38327	1.91374e-22	7.03446e-21	272.861	736.809
Ap3b1	1061.46	837.9	937.627	1299.58	1251.99	1247.24	1244.09	-0.424635	6.30572e-08	4.52879e-07	945.663	1260.72
Ap3b2	2.54547	0	0	0	1.00967	1.24724	1.83089	0.109174	0.848421	0.897561	0.848491	1.02195
Ap3d1	1982.92	1474.7	1789.18	2761.01	2928.04	3003.35	2601.7	-0.6887	2.37432e-11	2.8463e-10	1748.94	2823.52
Ap3m1	318.184	400.516	473.425	1147.31	996.543	956.631	792.776	-1.25505	2.77839e-30	1.82695e-28	397.375	973.315
Ap3m2	152.728	127.361	144.487	107.261	86.8315	103.521	92.46	0.523778	0.00233077	0.00673401	141.525	97.5183
Ap3s1	193.456	318.402	202.896	520.982	377.616	472.703	420.19	-0.865772	6.69095e-07	4.04326e-06	238.251	447.873
Ap3s2	399.639	372.028	322.79	362.963	363.481	336.754	380.825	0.00154458	0.989634	0.993889	364.819	361.006
Ap4b1	277.457	222.881	209.045	511.405	425.071	496.4	307.59	-0.865959	3.8985e-08	2.88512e-07	236.461	435.116
Ap4e1	519.277	323.429	370.44	336.148	299.872	334.26	326.814	0.294315	0.0256829	0.0550959	404.382	324.273
Ap4m1	338.548	254.722	216.73	229.845	210.011	208.289	219.707	0.290308	0.0671921	0.123979	270	216.963
Ap4s1	122.183	125.685	144.487	182.918	143.373	167.13	143.725	-0.262911	0.0602036	0.11319	130.785	159.287
Ap5b1	117.092	102.224	135.264	88.1072	153.47	202.052	147.387	-0.295414	0.182509	0.283438	118.193	147.754
Ap5m1	290.184	232.936	252.083	345.725	295.833	288.112	305.759	-0.268366	0.0097289	0.0237425	258.401	308.857
Ap5s1	45.8185	82.1142	64.5579	92.8956	114.093	135.949	82.3901	-0.680861	0.00146924	0.00445515	64.1636	106.332
Ap5z1	302.911	222.881	255.158	117.796	141.354	148.421	227.031	0.693144	0.00177472	0.00527954	260.317	158.65
Apaf1	458.185	496.037	358.143	333.275	307.949	344.238	389.065	0.344273	0.0069686	0.0177123	437.455	343.632
Apba1	86.5461	115.63	89.1514	38.3075	39.3771	57.3729	60.4194	0.977353	3.28435e-06	1.76537e-05	97.1093	48.8692
Apba2	2.54547	3.3516	0	2.87306	1.00967	0	0	0.329769	0.550884	0.66218	1.96569	0.970683
Apba3	180.729	242.991	247.472	209.733	348.336	333.012	395.473	-0.528612	0.00362061	0.00993974	223.731	321.639
Apbb1	66.1823	105.575	83.0031	49.7997	75.7252	61.1146	46.6877	0.515063	0.0316559	0.0660732	84.9203	58.3318
Apbb1ip	162.91	199.42	182.914	88.1072	90.8702	63.6091	71.4048	1.21085	4.53085e-13	6.648e-12	181.748	78.4978
Apbb2	1036.01	938.448	685.544	660.804	668.401	619.877	646.305	0.434384	6.29767e-05	0.000260566	886.667	648.847
Apbb3	369.094	182.662	184.451	151.315	196.885	113.499	181.258	0.555524	0.0156724	0.0359169	245.402	160.739
Apc	2217.11	2104.8	2095.06	2981.28	2442.39	2616.7	2377.41	-0.278665	0.00292876	0.0082522	2138.99	2604.45
Apc2	50.9095	63.6804	64.5579	33.519	43.4158	34.9226	56.7576	0.472322	0.0544316	0.104225	59.7159	42.1538
Apcdd1	310.548	430.681	187.525	121.626	187.798	107.262	148.302	1.05738	2.27372e-05	0.000103586	309.585	141.247
Apeh	346.185	390.461	313.567	371.583	398.819	352.968	360.686	-0.100505	0.36093	0.482344	350.071	371.014
Apela	0	0	0	0.957687	0	0	0	0.0899434	0.856323	0.903167	0	0.239422
Apex1	61.0914	117.306	127.579	96.7264	135.296	119.735	98.8682	-0.126743	0.536436	0.649164	101.992	112.656
Apex2	203.638	134.064	124.505	89.0649	69.6672	91.0483	84.221	0.828142	0.000319394	0.00113071	154.069	83.5004
Aph1a	165.456	174.283	190.6	205.903	260.495	231.986	266.395	-0.441869	0.00286239	0.00808581	176.78	241.195
Aph1b	117.092	157.525	132.19	76.615	84.8122	64.8563	97.9527	0.74685	4.6927e-05	0.000199507	135.602	81.0591
Aph1c	43.2731	36.8676	52.2612	20.1114	19.1837	22.4503	25.6325	0.967852	0.000355357	0.00124512	44.134	21.8445
Api5	794.188	930.069	972.98	1375.24	1336.8	1292.14	1164.45	-0.505121	7.26014e-05	0.000297133	899.079	1292.16
Apip	122.183	139.091	210.582	292.095	240.301	313.057	214.214	-0.708013	3.03909e-05	0.000134654	157.285	264.917
Apitd1	2.54547	18.4338	21.5193	12.4499	13.1257	32.4282	7.32357	-0.0651802	0.884104	0.921041	14.1662	16.3318
Aplf	185.82	110.603	124.505	108.219	87.8412	132.207	130.909	0.25446	0.160536	0.254774	140.309	114.794
Apln	313.093	90.4932	395.033	2655.67	2204.11	2148.99	1369.51	-2.85969	1.68382e-21	5.65114e-20	266.207	2094.57
Aplnr	554.913	665.293	559.502	1180.83	1383.25	1313.34	1111.35	-1.03107	1.33239e-05	6.33848e-05	593.236	1247.19
Aplp1	56.0004	55.3014	36.8902	57.4612	73.7058	125.971	65.9121	-0.696662	0.017979	0.0404716	49.3974	80.7625
Aplp2	4882.22	6145.16	4515.98	3644.96	3546.97	3340.1	3682.84	0.531878	1.21058e-05	5.80413e-05	5181.12	3553.72
Apmap	616.005	834.548	647.116	1290.96	1026.83	1035.21	728.695	-0.527531	0.000396456	0.00137528	699.223	1020.42
Apoa1	0	0	0	0.957687	0	0	0.915446	-0.0421019	0.886972	NA	0	0.468283
Apoa1bp	246.911	289.913	325.864	328.487	342.278	384.149	298.435	-0.220614	0.136064	0.222766	287.563	338.337
Apoa2	5.09095	0	1.53709	4.78844	4.03868	1.24724	2.74634	-0.41865	0.451855	0.572141	2.20935	3.20517
Apob	28.0002	15.0822	16.908	9.57687	3.02901	2.49447	9.15446	1.36533	0.00242792	0.006984	19.9968	6.0637
Apobec1	259.638	323.429	405.793	203.987	136.305	135.949	130.909	1.10219	3.04699e-07	1.95505e-06	329.62	151.788
Apobec2	129.819	234.612	301.27	4.78844	2.01934	3.74171	3.66178	2.94971	2.96962e-07	1.90817e-06	221.901	3.55282
Apobec3	2382.56	824.494	1455.63	1651.05	1609.41	1552.81	1471.12	-0.0611008	0.726473	0.809202	1554.23	1571.1
Apobec4	0	3.3516	0	1.91537	2.01934	1.24724	3.66178	-0.523834	0.350619	0.472298	1.1172	2.21093
Apobr	175.638	38.5434	176.766	505.659	391.752	708.431	368.925	-1.83502	1.78729e-10	1.87872e-09	130.316	493.691
Apoc1	155.274	333.484	258.232	299.756	205.972	231.986	189.497	0.0914392	0.741338	0.820863	248.997	231.803
Apoc3	7.63642	5.0274	3.07419	0	0	0	1.83089	1.63217	0.0036634	0.0100417	5.246	0.457723
Apod	346.185	221.206	524.149	667.508	1056.11	909.236	324.068	-0.928029	0.0133639	0.0312928	363.846	739.231
Apoe	3199.66	7329.95	10512.2	3114.4	3393.5	3128.07	3423.77	1.02819	4.48599e-05	0.000191406	7013.93	3264.93
Apof	40.7276	40.2192	38.4273	36.3921	21.203	16.2141	20.1398	0.636207	0.137394	0.224406	39.7914	23.4873
Apoh	0	0	0	0	0	0	0	0	1	NA	0	0
Apol10b	81.4552	53.6256	75.3176	111.092	130.247	137.196	82.3901	-0.684297	0.0134113	0.0313872	70.1328	115.231
Apol11a	0	0	0	0	0	0	0	0	1	NA	0	0
Apol11b	0	3.3516	0	17.2384	8.07735	12.4724	1.83089	-1.58745	0.00326652	0.00907555	1.1172	9.90475
Apol6	1074.19	564.745	582.559	504.701	549.26	369.182	601.448	0.498393	0.115911	0.195171	740.498	506.148
Apol7a	30.5457	1.6758	26.1306	362.963	292.804	749.59	108.023	-3.73518	3.93393e-20	1.18781e-18	19.4507	378.345
Apol7b	2.54547	1.6758	0	0.957687	0	1.24724	0	0.210157	0.63598	NA	1.40709	0.551231
Apol7c	15.2728	0	9.22256	5.74612	4.03868	4.98895	6.40812	0.371684	0.513955	0.629206	8.16514	5.29547
Apol7d	0	1.6758	3.07419	0	1.00967	0	0.915446	0.51079	0.311272	NA	1.58333	0.481279
Apol7e	10.1819	5.0274	4.61128	1.91537	5.04834	8.73066	5.49268	0.182413	0.73428	0.815335	6.60686	5.29676
Apol8	0	1.6758	3.07419	1.91537	0	1.24724	0	0.318452	0.522386	NA	1.58333	0.790653
Apol9a	10.1819	8.379	12.2967	35.4344	22.2127	31.1809	28.3788	-1.30239	0.00388777	0.0105897	10.2859	29.3017
Apol9b	2.54547	6.7032	6.14837	23.9422	13.1257	22.4503	19.2244	-1.42181	0.00331368	0.00918662	5.13235	19.6856
Apold1	53.455	112.279	55.3354	94.811	70.6768	88.5539	93.3755	-0.221043	0.4176	0.538656	73.6896	86.8543
Apom	7.63642	1.6758	10.7597	4.78844	4.03868	4.98895	10.0699	0.109681	0.828659	0.884507	6.69063	5.97149
Apon	0	1.6758	0	3.83075	0	3.74171	2.74634	-0.879433	0.109588	0.186434	0.5586	2.5797
Apoo	17.8183	25.137	15.3709	22.0268	33.3191	39.9116	21.0553	-0.490007	0.141835	0.230262	19.4421	29.0782
Apool	104.364	174.283	144.487	174.299	138.325	135.949	197.736	-0.161493	0.44359	0.564026	141.045	161.577
Apopt1	101.819	167.58	179.84	181.961	146.402	164.635	197.736	-0.173428	0.248857	0.361911	149.746	172.684
App	4426.58	6270.84	6053.08	4345.03	4759.58	4632.24	5821.32	0.186715	0.156053	0.248912	5583.5	4889.54
Appbp2	356.366	444.087	404.256	590.893	594.695	470.208	536.451	-0.430698	1.93722e-05	8.9264e-05	401.57	548.062
Appbp2os	20.3638	11.7306	13.8338	11.4922	9.08702	11.2251	20.1398	0.150938	0.725505	0.808475	15.3094	12.9861
Appl1	799.279	775.895	748.565	663.677	633.062	530.076	637.15	0.334053	3.51972e-05	0.000153687	774.58	615.991
Appl2	2168.74	735.676	1122.08	928.956	846.103	1181.13	1361.27	0.268339	0.193484	0.296667	1342.17	1079.37
Aprt	150.183	219.53	209.045	253.787	324.104	265.662	229.777	-0.477049	0.00182863	0.00542355	192.919	268.332
Aptx	272.366	253.046	222.879	229.845	197.895	182.097	204.144	0.275846	0.0273096	0.0581291	249.43	203.495
Aqp1	1702.92	1964.04	1218.92	2522.55	2261.66	2869.89	2708.8	-0.65592	0.00029734	0.0010626	1628.63	2590.73
Aqp11	17.8183	20.1096	16.908	12.4499	12.116	9.9779	10.0699	0.63296	0.0920481	0.16154	18.2787	11.1534
Aqp2	2.54547	0	1.53709	0.957687	1.00967	0	0	0.440759	0.421115	0.541695	1.36086	0.491839
Aqp3	0	0	19.9822	549.712	492.718	525.087	778.129	-4.53518	8.3887e-19	2.21011e-17	6.66074	586.412
Aqp4	38.1821	55.3014	43.0386	0.957687	1.00967	0	0.915446	2.06989	0.000203488	0.000754536	45.5074	0.7207
Aqp5	318.184	306.671	222.879	649.312	1034.91	1259.71	326.814	-1.40762	1.41742e-05	6.71056e-05	282.578	817.687
Aqp7	567.641	459.169	167.543	190.58	150.441	164.635	211.468	1.07511	1.6254e-05	7.61008e-05	398.118	179.281
Aqp9	12.7274	26.8128	10.7597	139.822	83.8025	69.8453	54.0113	-2.04937	2.63594e-07	1.70673e-06	16.7666	86.8704
Aqr	799.279	866.389	846.939	1093.68	982.408	954.137	881.574	-0.215703	0.00784625	0.0196644	837.535	977.949
Ar	674.551	655.238	542.594	370.625	380.645	258.178	274.634	0.938037	2.62974e-11	3.13135e-10	624.128	321.02
Araf	1005.46	656.914	770.084	968.222	1042.99	1065.14	873.335	-0.291501	0.00837209	0.0207944	810.82	987.421
Arap1	1494.19	1335.61	1372.62	831.272	867.306	865.583	1115.01	0.60282	3.20372e-07	2.04748e-06	1400.81	919.793
Arap2	837.461	678.699	564.113	425.213	427.09	391.633	506.242	0.646407	1.65011e-06	9.34185e-06	693.424	437.544
Arap3	931.644	529.553	418.089	435.748	505.844	491.412	530.959	0.337999	0.10815	0.184501	626.429	490.99
Arc	7.63642	134.064	36.8902	6.70381	8.07735	9.9779	24.717	1.73447	0.000263879	0.000954544	59.5302	12.369
Arcn1	1512.01	1848.41	1876.79	6321.69	5780.35	6296.05	3912.62	-1.6265	9.51867e-37	1.02421e-34	1745.74	5577.68
Areg	506.549	1441.19	351.994	9.57687	16.1547	0	0.915446	4.38471	7.61922e-17	1.62978e-15	766.577	6.66175
Arel1	786.552	750.758	722.434	1115.71	1010.68	894.269	895.306	-0.382294	4.72801e-06	2.47104e-05	753.248	978.99
Arf1	1176.01	1716.02	1715.4	4169.77	4227.48	4663.42	3305.68	-1.39237	6.68736e-41	9.42281e-39	1535.81	4091.59
Arf2	203.638	263.101	273.603	453.944	496.757	520.098	474.201	-0.94689	5.90991e-10	5.77778e-09	246.78	486.25
Arf3	1422.92	1080.89	1042.15	2139.47	2247.52	2132.78	1854.69	-0.82511	1.04981e-15	2.03698e-14	1181.99	2093.62
Arf4	697.46	955.206	934.553	2960.21	2803.85	2839.96	2070.74	-1.58221	1.73076e-27	9.25537e-26	862.406	2668.69
Arf5	292.73	465.872	353.532	277.729	373.577	372.924	385.403	0.0745608	0.525835	0.6398	370.711	352.408
Arf6	1277.83	1541.74	1449.48	2257.27	2273.77	2817.51	1922.44	-0.678875	3.87336e-06	2.05583e-05	1423.01	2317.75
Arfgap1	778.915	648.535	648.654	946.195	981.398	1063.89	931.008	-0.497583	0.000653574	0.0021596	692.034	980.624
Arfgap2	972.371	811.087	702.452	873.411	869.325	884.291	827.563	-0.0682998	0.527763	0.641423	828.637	863.647
Arfgap3	488.731	331.808	438.072	2375.06	2138.48	1924.49	2579.73	-2.41088	4.10134e-33	3.2948e-31	419.537	2254.44
Arfgef1	2166.2	2069.61	2204.19	3078.01	2781.64	2652.87	2526.63	-0.355864	0.000517796	0.00174871	2146.67	2759.79
Arfgef2	1776.74	945.151	1464.85	3522.37	3302.63	3340.1	2300.52	-1.15011	1.54982e-14	2.67141e-13	1395.58	3116.4
Arfgef3	132.365	152.498	122.967	953.856	925.866	1072.62	357.939	-2.37923	9.00395e-13	1.28605e-11	135.943	827.572
Arfip1	552.368	638.48	591.781	674.212	675.468	704.689	655.459	-0.176607	0.102811	0.176751	594.21	677.457
Arfip2	554.913	536.256	484.185	993.121	1049.05	1139.97	857.773	-0.930729	1.34213e-13	2.0994e-12	525.118	1009.98
Arfrp1	478.549	284.886	335.086	234.633	183.76	190.827	271.887	0.699835	4.47057e-05	0.000190794	366.174	220.277
Arg1	190.911	21.7854	56.8725	74.6996	95.9185	92.2956	52.1804	0.0443992	0.916759	0.943442	89.8561	78.7735
Arg2	196.002	196.069	144.487	366.794	302.901	306.82	402.796	-0.886579	0.00211965	0.00619155	178.852	344.828
Arglu1	1094.55	581.503	688.618	836.061	815.812	886.786	682.007	-0.0607911	0.653419	0.750472	788.225	805.167
Arhgap1	549.822	578.151	553.354	931.83	839.035	765.804	1057.34	-0.677826	1.08677e-07	7.53985e-07	560.442	898.502
[truncated: 16,852 more rows]

## Sheet: Virgin vs L10
Gene	WT_Virgin rep1	WT_Virgin rep2	WT_Virgin rep3	WT_L10 rep1	WT_L10 rep2	WT_L10 rep3	WT_L10 rep4	log2FoldChange	p-value	padj	WT_Virgin_mean	WT_L10_mean
0610005C13Rik	4.08682	9.94832	9.00216	6.08188	5.70622	23.8445	11.1294	0.78554	0.235329	0.295887	7.6791	11.6905
0610007P14Rik	133.922	116.182	114.327	158.129	168.333	150.404	148.392	0.361836	0.0211749	0.0336178	121.477	156.314
0610009B22Rik	185.164	195.769	183.944	261.521	236.808	218.269	207.748	0.296006	0.0324168	0.0497764	188.292	231.086
0610009L18Rik	23.2634	19.5413	18.3044	12.1638	2.85311	11.0051	7.41958	-1.26394	0.0226307	0.0357743	20.3697	8.3604
0610009O20Rik	255.583	176.938	163.539	447.018	308.136	407.19	341.301	0.93594	4.90792e-11	1.86866e-10	198.687	375.911
0610010F05Rik	857.603	1314.24	1163.98	623.393	659.068	575.936	634.374	-0.806684	5.89406e-13	2.53572e-12	1111.94	623.193
0610010K14Rik	80.1645	49.031	63.3152	72.9825	45.6498	67.8651	77.9056	0.0353677	0.882181	0.905949	64.1702	66.1007
0610011F06Rik	62.5597	44.0568	48.0115	298.012	185.452	187.087	192.909	2.06166	2.38346e-23	1.76596e-22	51.5427	215.865
0610012G03Rik	187.994	183.689	144.035	282.807	213.983	190.756	244.846	0.420092	0.0165552	0.0268129	171.906	233.098
0610030E20Rik	374.101	397.577	500.22	422.691	524.972	537.418	552.759	0.282695	0.0355364	0.0541235	423.966	509.46
0610037L13Rik	245.838	227.745	196.847	182.456	131.243	148.569	155.811	-0.539241	0.00215599	0.00400595	223.477	154.52
0610038B21Rik	5.97304	6.04005	4.50108	12.1638	17.1187	16.5077	18.5489	1.53493	0.00214252	0.00398322	5.50472	16.0848
0610039H22Rik	7.23052	8.17183	8.70208	3.04094	2.85311	18.3419	11.1294	0.21704	0.723576	0.769235	8.03481	8.84133
0610039K10Rik	0.628741	0.355297	1.80043	0	0	0	0	-0.86394	0.733559	NA	0.928156	0
0610040B10Rik	22.6347	34.4638	28.5068	36.4913	31.3842	27.5129	22.2587	0.0812378	0.830918	0.862431	28.5351	29.4118
0610040J01Rik	37.0957	17.0543	31.8076	30.4094	59.9153	42.1864	51.9371	0.678075	0.0584214	0.0852271	28.6525	46.112
0610043K17Rik	14.1467	18.1201	23.7057	45.6141	37.0904	23.8445	29.6783	0.909839	0.0285026	0.0442326	18.6575	34.0568
1010001N08Rik	6.60178	3.90827	7.20173	0	0	0	0	-3.61833	0.0156364	0.0254296	5.90392	0
1110001J03Rik	52.1855	27.0026	25.8062	118.597	99.8589	100.881	77.9056	1.55458	1.57864e-09	5.38305e-09	34.9981	99.3104
1110002L01Rik	20.1197	22.0284	25.5061	18.2456	28.5311	40.3522	22.2587	0.340997	0.342411	0.408734	22.5514	27.3469
1110004E09Rik	71.0477	72.4806	56.4135	158.129	176.893	80.7044	144.682	1.03829	2.58947e-05	6.0778e-05	66.6473	140.102
1110004F10Rik	464.011	578.424	529.027	516.96	373.757	320.983	589.857	-0.236465	0.201352	0.258057	523.82	450.389
1110006O24Rik	2.82934	0.710594	0.900216	6.08188	2.85311	5.50257	14.8392	2.44214	0.0048813	0.00862824	1.48005	7.31918
1110007C09Rik	53.443	23.8049	24.0058	106.433	116.978	82.5386	118.713	1.71229	3.88133e-11	1.48989e-10	33.7512	106.166
1110008F13Rik	93.9968	103.036	89.7215	477.428	365.198	324.652	471.143	2.07145	2.61265e-43	4.12695e-42	95.5848	409.605
1110008L16Rik	211.257	209.27	213.951	234.152	251.074	187.087	218.878	0.0723886	0.681595	0.732803	211.493	222.798
1110008P14Rik	72.6196	61.4664	35.4085	1082.57	707.571	630.962	767.926	3.81933	1.38889e-79	5.42887e-78	56.4982	797.259
1110012L19Rik	127.949	121.867	141.634	155.088	122.684	108.217	174.36	0.0780889	0.71148	0.758655	130.483	140.087
1110017D15Rik	0.943112	1.42119	0.600144	3.04094	2.85311	0	0	0.557637	0.716078	0.762826	0.988148	1.47351
1110019D14Rik	88.6525	120.446	125.43	63.8597	97.0057	86.207	126.133	-0.241248	0.271428	0.33476	111.509	93.3013
1110020A21Rik	14.7754	16.699	19.5047	9.12282	19.9718	14.6735	3.70979	-0.456177	0.415069	0.481906	16.993	11.8695
1110028F11Rik	13.8323	9.94832	8.70208	21.2866	88.4464	130.228	70.486	2.81511	1.04913e-10	3.90985e-10	10.8276	77.6116
1110032A03Rik	407.424	613.598	478.015	218.948	248.221	214.6	293.073	-1.02559	2.68821e-09	9.0155e-09	499.679	243.71
1110032F04Rik	9.43112	0.355297	7.20173	0	0	0	0	-3.43525	0.0305763	0.0471819	5.66271	0
1110034G24Rik	44.955	37.6615	44.4106	51.696	22.8249	36.6838	48.2273	-0.114098	0.707374	0.755039	42.3424	39.858
1110037F02Rik	1197.75	1427.23	1493.16	909.241	938.673	1039.99	1053.58	-0.461137	6.24078e-07	1.72136e-06	1372.71	985.37
1110038B12Rik	46.5268	45.1227	50.4121	91.2282	142.656	113.72	148.392	1.37266	5.30919e-12	2.14785e-11	47.3539	123.999
1110038F14Rik	77.6495	59.6899	54.9132	124.679	88.4464	80.7044	103.874	0.609963	0.00246066	0.00454107	64.0842	99.4259
1110046J04Rik	19.1766	28.4238	29.107	6.08188	2.85311	3.66838	3.70979	-2.61374	0.000975046	0.00190123	25.5691	4.07829
1110051M20Rik	108.143	111.563	114.928	27.3685	42.7967	45.8548	29.6783	-1.56621	1.40253e-09	4.81072e-09	111.545	36.4246
1110058D11Rik	15.0898	14.5672	21.005	6.08188	2.85311	5.50257	7.41958	-1.64195	0.0117218	0.0194626	16.8873	5.46429
1110059E24Rik	236.092	284.238	315.075	264.562	196.865	223.771	252.266	-0.239894	0.0905249	0.126414	278.468	234.366
1110059G10Rik	93.0537	143.54	150.336	121.638	128.39	104.549	140.972	-0.0265422	0.881021	0.905088	128.977	123.887
1110065P20Rik	3.14371	0.710594	0.300072	9.12282	11.4124	14.6735	3.70979	3.41791	1.78697e-05	4.26199e-05	1.38479	9.72964
1190002F15Rik	11.6317	3.55297	3.60086	0	5.70622	7.33676	3.70979	-0.245436	0.755577	0.798265	6.26185	4.18819
1190002N15Rik	714.879	1087.56	901.416	191.579	148.362	165.077	152.101	-2.42567	2.10525e-42	3.19975e-41	901.286	164.28
1190007I07Rik	22.9491	21.3178	22.2053	57.7779	17.1187	47.689	59.3566	1.0216	0.00359191	0.00647794	22.1574	45.4855
1200014J11Rik	386.361	429.909	491.818	301.053	399.435	388.849	341.301	-0.264329	0.0384576	0.0581842	436.03	357.659
1300002E11Rik	111.287	155.62	156.938	158.129	111.271	137.564	148.392	0.00378898	0.984276	0.988138	141.282	138.839
1300017J02Rik	0.943112	0.355297	0.600144	112.515	114.124	121.057	111.294	7.52825	1.74437e-31	1.81264e-30	0.632851	114.747
1500004A13Rik	28.6077	24.1602	27.0065	3.04094	31.3842	16.5077	18.5489	-0.628329	0.126393	0.170648	26.5915	17.3705
1500009L16Rik	8.48801	8.52713	9.30223	6.08188	0	3.66838	0	-1.73359	0.0631601	0.0914605	8.77245	2.43757
1500011B03Rik	49.0418	62.8876	54.313	15.2047	11.4124	9.17096	18.5489	-2.09247	2.8496e-07	8.1185e-07	55.4141	13.5843
1500011K16Rik	168.817	211.046	172.841	69.9416	42.7967	69.6993	66.7762	-1.54982	5.20103e-11	1.97492e-10	184.235	62.3034
1500012F01Rik	136.751	117.248	150.336	185.497	159.774	157.74	218.878	0.423159	0.062961	0.0912035	134.778	180.472
1500015A07Rik	25.1496	23.0943	26.4063	27.3685	11.4124	29.3471	14.8392	-0.230092	0.538442	0.602168	24.8834	20.7418
1500015O10Rik	7.85926	10.3036	10.8026	12.1638	5.70622	5.50257	0	-0.674643	0.292376	0.356724	9.65515	5.84314
1500017E21Rik	21.6916	17.4096	14.4035	3.04094	0	0	3.70979	-3.68255	0.00119458	0.00230243	17.8349	1.68768
1500026H17Rik	14.7754	17.0543	17.4042	69.9416	37.0904	45.8548	77.9056	1.81076	2.57398e-07	7.35062e-07	16.4113	57.6981
1600002D24Rik	1.57185	1.77648	0.900216	3.04094	8.55933	7.33676	0	1.82998	0.0559859	0.0820071	1.41618	4.73426
1600002H07Rik	59.416	33.3979	48.9117	69.9416	74.1809	84.3728	100.164	0.789528	0.00467546	0.00828173	47.2419	82.1649
1600002K03Rik	37.4101	32.6873	18.0043	197.661	136.949	113.72	137.262	2.31042	7.20863e-21	4.76978e-20	29.3672	146.398
1600010M07Rik	4.40119	5.68475	11.4027	3.04094	0	1.83419	0	-2.30496	0.0483729	0.0718277	7.16289	1.21878
1600012H06Rik	378.817	407.881	459.71	547.369	530.678	414.527	515.661	0.273501	0.0355837	0.0541859	415.469	502.059
1600014C10Rik	966.061	834.237	687.165	1733.34	1223.98	1355.47	1380.04	0.783789	2.40801e-05	5.67497e-05	829.154	1423.21
1600015I10Rik	1.25748	1.77648	0.300072	0	0	0	0	-1.08094	0.660622	NA	1.11135	0
1600020E01Rik	47.1556	60.7558	74.7179	69.9416	57.0622	55.0257	25.9685	-0.15965	0.56651	0.62815	60.8764	51.9995
1600023N17Rik	4.40119	3.90827	2.40058	0	5.70622	1.83419	0	-0.870384	0.464001	0.529938	3.57001	1.8851
1600029I14Rik	0.943112	1.42119	1.20029	0	2.85311	3.66838	0	0.714386	0.56165	0.623826	1.1882	1.63037
1600029O15Rik	6.60178	3.19767	9.30223	0	2.85311	0	0	-2.84274	0.0652962	0.0942144	6.36723	0.713278
1700001C19Rik	0.943112	1.42119	0.600144	0	8.55933	7.33676	0	2.28335	0.0614334	0.0892049	0.988148	3.97402
1700001D01Rik	15.0898	12.0801	20.1048	3.04094	11.4124	5.50257	0	-1.58442	0.0227996	0.0360245	15.7582	4.98899
1700001G11Rik	8.17363	7.81653	7.80187	0	0	1.83419	0	-3.23437	0.0174605	0.0281549	7.93068	0.458548
1700001G17Rik	0.943112	0.710594	0	0	0	1.83419	3.70979	1.42794	0.365814	0.43239	0.551235	1.386
1700001J03Rik	3.77245	3.19767	4.20101	3.04094	5.70622	7.33676	3.70979	0.447011	0.585504	0.646578	3.72371	4.94843
1700001K19Rik	14.461	6.39535	4.50108	0	8.55933	11.0051	7.41958	-0.175958	0.794572	0.831917	8.45249	6.74601
1700001K23Rik	4.40119	5.68475	12.3029	3.04094	19.9718	7.33676	3.70979	0.348418	0.632326	0.688868	7.46296	8.51482
1700001L05Rik	94.9399	152.422	83.42	361.872	493.588	376.009	482.273	1.96756	1.2548e-17	7.02773e-17	110.261	428.435
1700001O22Rik	2.20059	1.42119	1.50036	179.415	205.424	183.419	185.489	6.79867	3.25256e-60	8.41083e-59	1.70738	188.437
1700001P01Rik	1.25748	1.77648	1.20029	0	2.85311	5.50257	7.41958	1.53148	0.120345	0.163329	1.41142	3.94382
1700003E16Rik	1.25748	0.355297	0.300072	54.7369	57.0622	55.0257	59.3566	6.54748	1.39207e-22	9.96886e-22	0.637617	56.5454
1700003F12Rik	1.25748	1.42119	0.300072	6.08188	0	0	3.70979	1.13539	0.401428	0.468291	0.992914	2.44792
1700003G13Rik	1.25748	0.355297	0	27.3685	31.3842	45.8548	18.5489	6.07258	3.02783e-13	1.32524e-12	0.537593	30.7891
1700003G18Rik	1.25748	1.42119	1.20029	0	0	0	3.70979	-0.592571	0.739982	NA	1.29299	0.927447
1700007B14Rik	1.25748	1.06589	2.1005	0	2.85311	0	0	-0.747521	0.649944	NA	1.47463	0.713278
1700007G11Rik	0.628741	1.06589	1.80043	0	0	0	0	-1.06428	0.781045	NA	1.16502	0
1700007J10Rik	19.8053	23.8049	22.2053	6.08188	17.1187	18.3419	3.70979	-0.861992	0.0622911	0.0903184	21.9385	11.3131
1700007K13Rik	1.57185	0.355297	0.900216	12.1638	11.4124	7.33676	14.8392	3.61804	3.20071e-05	7.44043e-05	0.942455	11.438
1700007L15Rik	14.1467	12.4354	10.2024	15.2047	14.2656	23.8445	11.1294	0.429935	0.369408	0.436029	12.2615	16.111
1700008J07Rik	16.976	18.4754	22.8055	33.4503	11.4124	16.5077	25.9685	0.155941	0.720337	0.766501	19.419	21.8348
1700010I14Rik	9.74549	9.59302	12.603	30.4094	22.8249	11.0051	14.8392	0.86833	0.0576641	0.084246	10.6472	19.7696
1700011H14Rik	0.628741	1.77648	2.70065	0	2.85311	1.83419	3.70979	0.576616	0.631323	0.687933	1.70196	2.09927
1700011I03Rik	0.628741	1.06589	0.600144	0	0	0	0	-0.576989	0.745782	NA	0.764925	0
1700011L22Rik	2.20059	2.13178	1.50036	0	0	1.83419	0	-1.21287	0.409735	0.476927	1.94425	0.458548
1700012B07Rik	0.314371	0	0	364.913	310.989	251.284	345.01	11.4019	1.34747e-21	9.2007e-21	0.10479	318.049
1700012D01Rik	10.3742	6.75064	9.90237	21.2866	22.8249	14.6735	22.2587	1.15106	0.0177156	0.0285118	9.00908	20.2609
1700012D14Rik	15.4042	9.59302	15.3037	0	5.70622	3.66838	11.1294	-1.50863	0.0575972	0.0841702	13.4336	5.12599
1700012D16Rik	2.51496	1.06589	3.30079	0	14.2656	12.8393	7.41958	1.92435	0.00992586	0.0167023	2.29388	8.63112
1700012I11Rik	0.628741	2.13178	0.900216	0	0	0	0	-1.13873	0.766051	NA	1.22025	0
1700013F07Rik	0.628741	0.710594	0.600144	0	0	1.83419	0	0.387683	0.82955	NA	0.646493	0.458548
1700015E13Rik	10.6886	14.2119	6.30151	3.04094	11.4124	12.8393	7.41958	-0.296287	0.646676	0.702055	10.4007	8.67807
1700016C15Rik	1.88622	1.06589	6.30151	0	5.70622	0	7.41958	0.123737	0.914285	0.932227	3.08454	3.28145
1700017B05Rik	154.042	88.469	87.0208	754.153	659.068	698.827	623.245	2.66671	7.7075e-127	6.64025e-125	109.844	683.823
1700018L02Rik	1.57185	0.355297	1.20029	6.08188	8.55933	3.66838	3.70979	2.33962	0.0202996	0.0323621	1.04248	5.50485
1700019A02Rik	0.628741	1.77648	0.300072	0	0	0	0	-0.756327	0.766127	NA	0.901766	0
1700019D03Rik	19.491	19.5413	30.3073	194.62	282.458	280.631	215.168	3.43511	1.31831e-25	1.07645e-24	23.1132	243.219
1700019E08Rik	1.88622	1.77648	3.60086	0	2.85311	0	0	-1.38767	0.461369	NA	2.42119	0.713278
1700019G17Rik	43.0688	22.739	29.407	21.2866	14.2656	38.518	14.8392	-0.433867	0.291731	0.356092	31.7383	22.2273
1700019L03Rik	8.17363	4.26356	6.60158	6.08188	14.2656	9.17096	11.1294	0.657409	0.246522	0.30808	6.34626	10.1619
1700020D05Rik	10.0599	5.68475	9.90237	3.04094	2.85311	3.66838	3.70979	-1.36826	0.108652	0.149029	8.54899	3.31806
1700020I14Rik	733.741	869.412	959.93	760.235	750.368	689.656	730.829	-0.208008	0.0251069	0.0393607	854.361	732.772
1700020L24Rik	75.4489	64.6641	40.5097	60.8188	48.5029	31.1812	51.9371	-0.354016	0.266002	0.329159	60.2076	48.11
1700021F05Rik	147.44	158.818	150.036	164.211	139.802	110.051	174.36	-0.0849727	0.612193	0.670743	152.098	147.106
1700021K19Rik	499.535	391.537	357.686	425.732	413.701	445.708	378.399	0.00637732	0.953462	0.963562	416.253	415.885
1700022H01Rik	3.14371	1.06589	3.60086	0	0	1.83419	3.70979	-0.957031	0.472629	0.538589	2.60349	1.386
1700022I11Rik	2.51496	5.68475	3.30079	3.04094	2.85311	11.0051	7.41958	0.795907	0.297715	0.36214	3.8335	6.07969
1700024F13Rik	0.943112	0.710594	0.900216	0	2.85311	3.66838	0	1.03516	0.480566	0.54616	0.851307	1.63037
1700024P16Rik	19.8053	14.9225	33.9081	103.392	136.949	221.937	144.682	2.76234	2.42207e-21	1.63793e-20	22.8786	151.74
1700025G04Rik	315.628	264.696	381.992	894.036	1052.8	785.034	879.22	1.50941	3.11423e-16	1.6126e-15	320.772	902.772
1700025N23Rik	5.3443	6.75064	7.5018	0	0	3.66838	0	-2.33239	0.0491274	0.072852	6.53225	0.917096
1700026D08Rik	0	0.355297	0.300072	12.1638	5.70622	9.17096	0	5.34198	3.79573e-05	8.74059e-05	0.218456	6.76023
1700026L06Rik	2.20059	2.84238	2.1005	0	0	1.83419	0	-1.50766	0.290484	0.35488	2.38116	0.458548
1700027J07Rik	0.314371	0	0.300072	0	0	1.83419	3.70979	2.71701	0.103924	0.143265	0.204814	1.386
1700028E10Rik	12.2605	25.5814	20.4049	30.4094	202.571	161.409	129.843	2.86568	1.01133e-08	3.24725e-08	19.4156	131.058
1700028J19Rik	1.25748	0.710594	0.900216	6.08188	0	1.83419	7.41958	1.88321	0.0852119	0.119758	0.956097	3.83391
1700028K03Rik	7.54489	11.0142	14.7035	3.04094	5.70622	5.50257	0	-1.42492	0.0549907	0.0806893	11.0875	3.56243
1700029H14Rik	1.88622	1.77648	1.50036	6.08188	0	1.83419	0	0.256774	0.84553	0.87523	1.72102	1.97902
1700029I15Rik	9.43112	9.23772	5.10122	0	22.8249	20.1761	11.1294	0.788043	0.231548	0.291784	7.92335	13.5326
1700029J07Rik	26.0928	31.6214	55.2132	27.3685	11.4124	31.1812	37.0979	-0.429307	0.268129	0.331282	37.6425	26.765
1700030C10Rik	19.8053	19.5413	20.1048	15.2047	22.8249	20.1761	0	-0.368032	0.528052	0.592195	19.8172	14.5514
1700030F18Rik	1.57185	2.84238	2.70065	0	0	0	0	-2.15788	0.493643	NA	2.37163	0
1700030J22Rik	7.23052	4.61886	7.5018	3.04094	19.9718	7.33676	14.8392	0.758578	0.213592	0.271692	6.45039	11.2972
1700030K09Rik	71.3621	51.1628	66.3159	66.9007	68.4746	88.0412	96.4545	0.340945	0.175956	0.229206	62.9469	79.9678
1700034H15Rik	5.3443	2.13178	3.30079	6.08188	11.4124	22.0103	7.41958	1.75893	0.00495951	0.00875915	3.59229	11.731
1700034I23Rik	6.28741	4.26356	10.8026	0	5.70622	7.33676	11.1294	-0.264493	0.762534	0.804076	7.11785	6.04309
1700034J05Rik	15.0898	27.0026	26.7064	3.04094	5.70622	12.8393	0	-1.79921	0.00269101	0.00494456	22.9329	5.39662
1700034P13Rik	5.3443	3.55297	2.70065	0	0	0	0	-2.90654	0.0434114	0.0650382	3.86597	0
1700037C18Rik	12.8892	8.52713	4.80115	15.2047	11.4124	14.6735	14.8392	0.727876	0.12788	0.17253	8.73916	14.0325
1700037H04Rik	140.209	92.3772	61.2147	112.515	48.5029	86.207	89.035	-0.177645	0.522683	0.586954	97.9337	84.0649
1700040L02Rik	0.943112	1.42119	1.20029	0	0	0	3.70979	-0.474143	0.701717	0.750281	1.1882	0.927447
1700042G15Rik	0.314371	0	0	18.2456	25.678	7.33676	11.1294	6.96518	6.00303e-08	1.81629e-07	0.10479	15.5974
1700047A11Rik	5.65867	9.23772	13.8033	3.04094	0	14.6735	0	-0.827476	0.315598	0.380819	9.56657	4.42862
1700047G03Rik	176.991	511.628	141.634	0	0	1.83419	0	-8.31717	1.25905e-09	4.33296e-09	276.751	0.458548
1700047M11Rik	1.57185	2.13178	3.00072	3.04094	0	1.83419	0	-0.777431	0.60271	0.661961	2.23478	1.21878
1700048M11Rik	3.14371	7.81653	11.1027	6.08188	2.85311	3.66838	7.41958	-0.419373	0.588788	0.649694	7.3543	5.00574
1700048O20Rik	3.77245	4.97416	9.90237	3.04094	42.7967	16.5077	25.9685	1.91976	0.00307772	0.00560933	6.21633	22.0785
1700049G17Rik	150.898	186.886	251.16	82.1054	97.0057	102.715	55.6468	-1.1441	1.22132e-07	3.59789e-07	196.315	84.3682
1700052K11Rik	50.928	66.4405	57.6138	24.3275	14.2656	25.6787	40.8077	-1.17912	0.000395174	0.000809033	58.3275	26.2699
1700056E22Rik	7.54489	11.3695	6.00144	3.04094	0	5.50257	0	-1.79026	0.10863	0.14901	8.30528	2.13588
1700057H21Rik	2.51496	0.710594	0.900216	0	0	0	0	-1.27386	0.739099	NA	1.37526	0
1700061G19Rik	6.28741	4.26356	4.20101	6.08188	0	3.66838	0	-0.906488	0.36252	0.429098	4.91733	2.43757
1700065J18Rik	2.82934	0.710594	1.20029	0	0	0	0	-1.49162	0.352991	NA	1.58007	0
1700066B19Rik	4.40119	1.42119	5.40129	0	2.85311	0	3.70979	-1.47425	0.221104	0.280045	3.74122	1.64072
1700066M21Rik	162.215	212.823	181.543	188.538	131.243	124.725	137.262	-0.355328	0.0741778	0.105702	185.527	145.442
1700067G17Rik	0	0.355297	0	3.04094	0	5.50257	0	4.41598	0.0163608	0.026521	0.118432	2.13588
1700067K01Rik	5.3443	3.19767	6.90165	3.04094	5.70622	9.17096	0	-0.0733342	0.924322	0.940587	5.14788	4.47953
1700071M16Rik	16.3473	16.699	18.9045	0	2.85311	5.50257	11.1294	-1.90287	0.00501697	0.00885231	17.3169	4.87126
1700073E17Rik	2.20059	2.48708	1.80043	0	0	0	0	-2.12977	0.38612	NA	2.1627	0
1700074H08Rik	3.14371	2.84238	2.40058	3.04094	0	1.83419	7.41958	0.0154022	0.989074	0.992129	2.79555	3.07368
1700084E18Rik	1.25748	0.710594	2.1005	18.2456	0	1.83419	3.70979	1.99648	0.053913	0.0792575	1.35619	5.9474
1700084J12Rik	3.77245	4.61886	4.50108	3.04094	0	1.83419	7.41958	-0.623345	0.538511	0.602205	4.29746	3.07368
1700085C21Rik	0	1.06589	2.40058	0	0	1.83419	0	0.775257	0.729383	NA	1.15549	0.458548
1700086O06Rik	30.1796	40.5039	38.7093	9.12282	39.9435	34.8496	18.5489	-0.434375	0.224862	0.284123	36.4642	25.6162
1700088E04Rik	3.45808	2.13178	1.80043	6.08188	2.85311	3.66838	0	0.445747	0.655683	0.710281	2.46343	3.15084
1700092M07Rik	0.628741	0.355297	0.900216	0	2.85311	3.66838	7.41958	2.38755	0.0281789	0.0437705	0.628085	3.48527
1700093K21Rik	0.314371	2.84238	3.30079	0	0	0	3.70979	-0.756332	0.611809	0.670366	2.15251	0.927447
1700094D03Rik	40.8682	41.2145	51.9124	82.1054	71.3278	82.5386	51.9371	0.725565	0.00212727	0.00395781	44.665	71.9772
1700094J05Rik	1.57185	1.06589	1.80043	0	2.85311	0	3.70979	-0.0708559	0.959573	0.968173	1.47939	1.64072
1700095J12Rik	7.85926	4.61886	6.60158	3.04094	0	3.66838	0	-1.71076	0.0814904	0.114996	6.3599	1.67733
1700096K18Rik	29.5508	44.4121	39.3094	12.1638	17.1187	23.8445	7.41958	-1.19364	0.00600506	0.0104591	37.7575	15.1366
1700099I09Rik	5.02993	4.61886	11.4027	0	8.55933	3.66838	11.1294	-0.28484	0.699695	0.748688	7.01717	5.83927
1700100L14Rik	1.25748	1.42119	2.1005	0	0	1.83419	0	-0.879836	0.578112	NA	1.59306	0.458548
1700101I11Rik	1.57185	1.06589	2.40058	0	2.85311	1.83419	7.41958	0.741638	0.578838	0.640305	1.67944	3.02672
1700102H20Rik	3.45808	4.97416	3.90093	3.04094	0	3.66838	7.41958	-0.256017	0.766079	0.807189	4.11106	3.53223
1700102P08Rik	2.82934	4.97416	8.40201	6.08188	2.85311	9.17096	11.1294	0.599803	0.363283	0.429829	5.40184	7.30883
1700105P06Rik	0.628741	0.710594	0.600144	0	2.85311	5.50257	0	1.79717	0.165804	0.217356	0.646493	2.08892
1700108F19Rik	11.6317	8.17183	6.60158	0	0	0	0	-4.08732	0.00473846	0.00838717	8.80171	0
1700108J01Rik	2.82934	3.19767	4.50108	3.04094	5.70622	3.66838	0	-0.0445366	0.961531	0.969802	3.50936	3.10389
1700109G15Rik	0	0.355297	0	3.04094	11.4124	18.3419	11.1294	6.7818	7.76367e-06	1.92875e-05	0.118432	10.9812
1700109H08Rik	29.5508	31.9767	44.1106	12.1638	5.70622	25.6787	18.5489	-1.08781	0.0113452	0.0188836	35.2127	15.5244
1700109K24Rik	38.6676	47.6098	46.8112	21.2866	34.2373	45.8548	33.3881	-0.339887	0.231305	0.2915	44.3629	33.6917
1700110C19Rik	4.08682	4.97416	6.90165	0	8.55933	3.66838	0	-0.705445	0.504135	0.568773	5.32088	3.05693
1700110K17Rik	1.88622	1.06589	0.900216	3.04094	8.55933	14.6735	14.8392	3.07101	8.34979e-05	0.000184862	1.28411	10.2782
1700112E06Rik	13.2036	18.4754	14.1034	3.04094	11.4124	5.50257	0	-1.52194	0.0318274	0.0489474	15.2608	4.98899
1700112J16Rik	10.6886	10.6589	13.5032	6.08188	14.2656	9.17096	7.41958	-0.314277	0.589751	0.650544	11.6169	9.23449
1700113A16Rik	62.2454	59.3346	48.3116	94.2691	77.034	69.6993	89.035	0.52077	0.0211465	0.0335854	56.6305	82.5093
1700113H08Rik	3.45808	5.32945	8.10194	0	0	0	3.70979	-2.70407	0.0796957	0.112751	5.62982	0.927447
1700119H24Rik	0.314371	1.06589	1.20029	0	0	9.17096	0	1.88194	0.12689	0.171277	0.860183	2.29274
1700120C14Rik	2.20059	1.77648	1.20029	0	0	3.66838	0	-0.63573	0.702774	0.751174	1.72579	0.917096
1700120E14Rik	2.82934	2.48708	6.30151	12.1638	8.55933	9.17096	3.70979	1.21967	0.0544881	0.0800423	3.87264	8.40096
1700120K04Rik	2.51496	2.13178	2.1005	6.08188	5.70622	5.50257	0	1.02519	0.201839	0.258593	2.24908	4.32267
1700123I01Rik	2.82934	0.710594	1.20029	0	0	0	0	-1.48366	0.495767	NA	1.58007	0
1700123L14Rik	0.628741	0.710594	1.50036	3.04094	0	0	0	-0.198186	0.928403	NA	0.946565	0.760235
1700123M08Rik	18.2335	20.6072	26.1063	0	2.85311	1.83419	3.70979	-3.39553	0.000371078	0.000762196	21.649	2.09927
1700123O20Rik	195.853	211.402	166.54	410.527	350.933	353.999	422.916	0.998018	1.75897e-12	7.33563e-12	191.265	384.594
1700124L16Rik	0.314371	0.355297	1.80043	0	2.85311	1.83419	0	0.902432	0.627964	NA	0.823366	1.17183
1700125H03Rik	8.17363	8.52713	9.90237	3.04094	0	3.66838	3.70979	-1.73422	0.0651254	0.0940242	8.86771	2.60478
1810006J02Rik	2.20059	1.42119	3.90093	0	2.85311	3.66838	0	-0.482102	0.704623	0.752674	2.50757	1.63037
1810010D01Rik	2.51496	3.19767	3.00072	6.08188	2.85311	3.66838	0	0.191704	0.841487	0.871846	2.90445	3.15084
1810010H24Rik	31.4371	28.4238	29.7071	6.08188	2.85311	5.50257	7.41958	-2.50224	0.00023339	0.000491155	29.856	5.46429
1810011H11Rik	33.6377	49.3863	47.1113	24.3275	19.9718	20.1761	18.5489	-1.03649	0.00444727	0.00790324	43.3784	20.7561
1810011O10Rik	685.013	488.889	457.31	434.854	233.955	297.139	274.524	-0.792655	0.0020178	0.00376742	543.737	310.118
1810012K16Rik	4.08682	2.48708	5.10122	12.1638	8.55933	5.50257	3.70979	0.940874	0.197192	0.253369	3.89171	7.48386
1810013A23Rik	4.40119	2.84238	2.40058	6.08188	14.2656	3.66838	0	0.927719	0.229597	0.289481	3.21471	6.00395
1810013L24Rik	780.896	1278.71	1153.78	1046.08	1055.65	1109.69	1049.87	0.0417211	0.679906	0.7315	1071.13	1065.32
1810014B01Rik	48.0987	61.8217	72.0173	21.2866	11.4124	18.3419	37.0979	-1.49346	2.32834e-05	5.49495e-05	60.6459	22.0347
1810019D21Rik	14.1467	6.39535	5.40129	145.965	259.633	205.429	159.521	4.56716	2.00808e-69	6.48346e-68	8.64777	192.637
1810020O05Rik	0.314371	0.355297	2.1005	0	0	1.83419	0	0.277619	0.88336	NA	0.92339	0.458548
1810021B22Rik	3.77245	1.42119	1.20029	24.3275	25.678	14.6735	25.9685	3.46832	2.73014e-10	9.83596e-10	2.13131	22.6619
1810022K09Rik	167.874	311.951	249.66	209.825	205.424	205.429	352.43	0.0372174	0.853907	0.882332	243.161	243.277
1810024B03Rik	4.08682	2.48708	4.20101	12.1638	17.1187	9.17096	7.41958	1.66334	0.00680628	0.0117516	3.59163	11.4682
1810026B05Rik	276.332	407.526	491.818	407.486	362.345	405.356	367.269	0.0451543	0.736517	0.780717	391.892	385.614
1810026J23Rik	347.065	454.78	412.899	520.001	462.204	363.17	396.948	0.115544	0.446976	0.513236	404.915	435.58
1810030O07Rik	362.469	454.07	495.719	270.644	233.955	223.771	248.556	-0.825829	4.86532e-11	1.85286e-10	437.419	244.231
1810032O08Rik	29.5508	22.739	26.1063	72.9825	74.1809	99.0463	81.6154	1.65599	8.18132e-13	3.48248e-12	26.132	81.9563
1810034E14Rik	29.8652	21.6731	21.9052	12.1638	19.9718	25.6787	11.1294	-0.439829	0.279175	0.342723	24.4812	17.2359
1810037I17Rik	401.137	473.966	450.708	565.615	573.475	577.77	779.056	0.494554	0.00211777	0.003941	441.937	623.979
1810041H14Rik	3.45808	2.84238	2.1005	9.12282	0	7.33676	3.70979	0.911929	0.26914	0.332361	2.80032	5.04234
1810043G02Rik	108.143	75.6783	65.1156	200.702	199.718	209.098	226.297	1.34135	1.01683e-09	3.52138e-09	82.9791	208.954
1810043H04Rik	15.7185	11.3695	10.8026	57.7779	48.5029	47.689	44.5175	1.97686	1.32639e-10	4.89454e-10	12.6302	49.6218
1810044D09Rik	6.60178	6.75064	5.40129	15.2047	19.9718	9.17096	11.1294	1.12403	0.041811	0.0627909	6.25124	13.8692
1810055G02Rik	88.9669	69.2829	51.6124	72.9825	68.4746	73.3676	100.164	0.164938	0.429659	0.495948	69.954	78.7473
1810058I24Rik	221.003	276.776	159.038	209.825	128.39	124.725	174.36	-0.470967	0.0740836	0.105576	218.939	159.325
1810062G17Rik	17.2904	9.94832	13.8033	45.6141	48.5029	45.8548	51.9371	1.79924	1.67867e-08	5.30924e-08	13.6807	47.9772
1810062O18Rik	3.14371	6.04005	5.10122	0	2.85311	0	3.70979	-1.7178	0.165934	0.217459	4.76166	1.64072
1810064F22Rik	4.08682	2.84238	4.50108	3.04094	0	7.33676	3.70979	-0.0070714	0.993782	0.995846	3.81009	3.52187
2010001A14Rik	12.2605	14.5672	17.1041	24.3275	31.3842	23.8445	14.8392	0.726233	0.061473	0.0892471	14.6439	23.5988
2010001E11Rik	14.1467	11.3695	12.0029	6.08188	0	5.50257	11.1294	-1.20536	0.0987702	0.136854	12.5064	5.67846
2010003K11Rik	67.904	63.2429	10.2024	15.2047	0	5.50257	7.41958	-2.71111	0.0017794	0.00334598	47.1165	7.03171
2010005H15Rik	0.628741	1.77648	1.50036	0	0	0	0	-1.19844	0.680029	NA	1.30186	0
2010009K17Rik	3.14371	2.48708	4.50108	0	2.85311	9.17096	0	0.00203553	0.998437	0.999206	3.37729	3.00602
2010012O05Rik	165.045	198.611	153.337	30.4094	54.2091	34.8496	37.0979	-2.14114	1.49901e-15	7.4822e-15	172.331	39.1415
2010016I18Rik	17.9191	6.75064	18.3044	3.04094	17.1187	11.0051	3.70979	-0.66945	0.328144	0.393736	14.3247	8.71863
2010106C02Rik	12.5748	5.32945	7.5018	0	0	1.83419	3.70979	-2.62351	0.0281399	0.043718	8.46869	1.386
2010107E04Rik	443.891	583.042	468.712	939.65	778.899	913.427	938.577	0.850209	2.72999e-10	9.83596e-10	498.549	892.638
2010107G12Rik	3.45808	1.06589	2.70065	0	2.85311	0	7.41958	-0.111496	0.926941	0.94257	2.4082	2.56817
2010107G23Rik	16.6616	21.3178	23.7057	106.433	85.5933	130.228	144.682	2.52379	1.2755e-19	7.94473e-19	20.5617	116.734
2010109A12Rik	5.02993	4.26356	4.80115	15.2047	0	11.0051	7.41958	0.85972	0.265591	0.328771	4.69821	8.40736
2010109I03Rik	0.943112	1.77648	0.600144	0	0	1.83419	0	-0.376148	0.848236	NA	1.10658	0.458548
2010111I01Rik	440.433	375.549	392.794	550.41	767.487	1104.18	745.668	0.973299	9.67513e-06	2.37359e-05	402.925	791.937
2010204K13Rik	2.82934	2.84238	1.80043	3.04094	5.70622	1.83419	0	0.116862	0.907049	0.926312	2.49071	2.64534
2010300C02Rik	35.2095	13.5013	18.9045	477.428	559.21	519.076	508.241	4.56745	1.23731e-155	1.63228e-153	22.5384	515.989
2010310C07Rik	5.65867	4.97416	4.20101	0	2.85311	11.0051	0	-0.418726	0.675285	0.727232	4.94461	3.46456
2010315B03Rik	365.927	378.747	484.616	729.825	656.215	669.48	775.346	0.791672	2.10741e-08	6.61569e-08	409.763	707.717
2010320M18Rik	27.3502	20.6072	22.8055	167.252	131.243	88.0412	77.9056	2.28325	5.83947e-17	3.15436e-16	23.5876	116.11
2200002D01Rik	7.23052	7.10594	3.00072	6.08188	19.9718	14.6735	22.2587	1.39912	0.0108099	0.0180567	5.77906	15.7465
2210013O21Rik	134.236	182.978	173.742	66.9007	39.9435	60.5283	44.5175	-1.57764	1.26125e-12	5.31107e-12	163.652	52.9725
2210015D19Rik	93.6824	96.2855	77.7186	194.62	154.068	157.74	166.941	0.909098	1.18334e-07	3.49029e-07	89.2288	168.342
2210016F16Rik	577.813	624.612	497.519	504.796	390.876	407.19	422.916	-0.400529	0.00134765	0.00257892	566.648	431.445
2210016L21Rik	109.715	73.9018	67.8162	121.638	85.5933	78.8702	100.164	0.20183	0.388137	0.454987	83.8111	96.5664
2210018M11Rik	268.472	284.948	310.574	279.766	350.933	337.491	304.203	0.15742	0.228921	0.288733	287.998	318.098
2210039B01Rik	0.314371	1.77648	3.00072	9.12282	8.55933	3.66838	7.41958	2.56276	0.00325662	0.00590923	1.69719	7.19253
2210404O09Rik	72.934	97.7067	144.335	24.3275	45.6498	33.0154	37.0979	-1.52361	3.49555e-06	8.9814e-06	104.992	35.0227
2210406O10Rik	5.97304	5.32945	3.00072	0	2.85311	1.83419	7.41958	-0.794597	0.396542	0.46336	4.76774	3.02672
2210408F21Rik	62.2454	106.944	82.8198	246.316	202.571	212.766	259.685	1.49161	7.25382e-14	3.2918e-13	84.0032	230.335
2210408I21Rik	229.176	306.266	313.875	82.1054	105.565	80.7044	122.423	-1.53018	4.26367e-13	1.85462e-12	283.106	97.6995
2210409D07Rik	1.25748	1.77648	0.300072	0	0	0	0	-1.14192	0.643776	NA	1.11135	0
2210416O15Rik	6.28741	8.17183	6.60158	0	8.55933	5.50257	14.8392	-0.0304526	0.965317	0.972682	7.02027	7.22527
2210417A02Rik	0	2.13178	3.00072	0	0	0	0	-0.440909	0.898159	NA	1.71083	0
2300009A05Rik	30.4939	33.3979	21.3051	63.8597	54.2091	45.8548	44.5175	0.869637	0.00223292	0.0041407	28.399	52.1103
2310001H17Rik	27.979	29.4897	30.3073	158.129	154.068	218.269	207.748	2.67037	4.81086e-40	6.74719e-39	29.2586	184.553
2310001K24Rik	1.57185	0.355297	0.600144	3.04094	0	0	0	0.155367	0.930831	NA	0.842431	0.760235
2310002F09Rik	2.20059	1.06589	3.30079	0	0	0	0	-1.98427	0.304488	NA	2.18909	0
2310002L09Rik	5.02993	3.55297	8.10194	0	0	0	0	-3.44418	0.129744	0.174779	5.56161	0
2310007B03Rik	2.51496	1.06589	0.300072	0	0	0	0	-1.05674	0.782685	NA	1.29364	0
2310009A05Rik	71.6765	88.8242	66.0158	209.825	134.096	122.891	163.231	1.04106	8.51702e-07	2.3189e-06	75.5055	157.511
2310009B15Rik	19.1766	18.4754	11.7028	69.9416	57.0622	31.1812	25.9685	1.47009	8.63788e-05	0.000191015	16.4516	46.0384
2310010G23Rik	6.60178	11.3695	6.00144	3.04094	2.85311	5.50257	7.41958	-0.742599	0.34267	0.408841	7.99091	4.70405
2310010J17Rik	42.7544	46.8992	45.6109	15.2047	5.70622	7.33676	11.1294	-2.24147	6.66655e-06	1.66748e-05	45.0882	9.84426
2310011J03Rik	155.928	115.472	88.5212	197.661	196.865	168.746	185.489	0.646544	6.5486e-05	0.000146852	119.974	187.19
2310015A10Rik	105.629	108.01	120.329	72.9825	97.0057	111.886	63.0664	-0.332278	0.0918952	0.128158	111.323	86.2351
2310015D24Rik	1.25748	3.55297	6.00144	3.04094	0	1.83419	0	-1.14323	0.418102	0.484646	3.60396	1.21878
2310022A10Rik	50.6137	34.1085	26.7064	21.2866	42.7967	66.0309	44.5175	0.292441	0.418406	0.484948	37.1429	43.6579
2310022B05Rik	120.404	114.406	89.7215	82.1054	91.2995	97.2121	70.486	-0.329421	0.149176	0.197847	108.177	85.2758
2310030G06Rik	47.47	28.7791	48.6116	63.8597	59.9153	67.8651	33.3881	0.452571	0.191977	0.247176	41.6202	56.2571
2310033P09Rik	72.934	68.5723	54.313	69.9416	65.6215	99.0463	40.8077	0.126141	0.620591	0.678622	65.2731	68.8543
2310034G01Rik	15.0898	9.59302	10.5025	9.12282	25.678	45.8548	18.5489	1.14247	0.00394355	0.00706458	11.7284	24.8011
2310035C23Rik	615.223	881.137	960.83	662.925	1029.97	979.458	927.447	0.180591	0.26347	0.326512	819.063	899.951
2310036O22Rik	231.062	244.8	216.352	504.796	353.786	353.999	393.238	0.792154	4.62474e-06	1.17381e-05	230.738	401.455
2310039H08Rik	57.8442	56.8475	47.1113	115.556	79.8871	71.5335	55.6468	0.576765	0.014467	0.0236692	53.9343	80.6558
2310040G24Rik	17.2904	8.17183	15.3037	15.2047	11.4124	5.50257	11.1294	-0.406027	0.469464	0.535597	13.5886	10.8123
2310045N01Rik	181.706	160.594	109.826	155.088	159.774	198.093	185.489	0.224452	0.23238	0.292641	150.709	174.611
2310047M10Rik	63.1885	54.3604	48.3116	36.4913	48.5029	55.0257	70.486	-0.0831229	0.747146	0.790347	55.2868	52.6265
2310057J18Rik	0	0	0	33.4503	17.1187	7.33676	14.8392	8.11051	2.89376e-10	1.03966e-09	0	18.1862
2310057M21Rik	81.422	85.6266	83.1199	45.6141	37.0904	42.1864	44.5175	-0.98005	5.19385e-05	0.000117802	83.3895	42.3521
2310061I04Rik	41.1825	28.4238	27.9067	51.696	131.243	88.0412	111.294	1.55301	5.56264e-09	1.82178e-08	32.5043	95.5685
2310067B10Rik	225.404	87.4031	80.4193	419.65	570.622	447.543	445.175	1.96578	6.53109e-49	1.22266e-47	131.075	470.747
2310068J16Rik	0.314371	1.77648	1.50036	0	0	3.66838	3.70979	1.06899	0.405211	0.472248	1.19707	1.84454
2310069B03Rik	1.57185	3.55297	3.90093	0	0	3.66838	3.70979	-0.534195	0.709538	0.756966	3.00859	1.84454
2310069G16Rik	3.14371	3.90827	1.50036	3.04094	2.85311	3.66838	0	-0.120194	0.913694	0.931681	2.85078	2.39061
2400006E01Rik	0.314371	1.06589	0	3.04094	2.85311	5.50257	3.70979	3.06675	0.0104724	0.0175521	0.460087	3.7766
2410002F23Rik	153.727	112.629	143.434	142.924	233.955	179.751	144.682	0.362959	0.0636984	0.0921373	136.597	175.328
2410004B18Rik	140.838	146.382	135.933	97.3101	77.034	97.2121	103.874	-0.590255	0.00179828	0.00337735	141.051	93.8576
2410004I01Rik	1.88622	2.13178	0.300072	0	0	0	0	-1.43777	0.617226	NA	1.43936	0
2410004P03Rik	3.77245	1.42119	0.300072	3.04094	0	5.50257	3.70979	1.00294	0.467575	0.533622	1.83124	3.06333
2410006H16Rik	86.1375	65.0193	57.6138	109.474	82.7402	110.051	77.9056	0.46761	0.0225257	0.0356217	69.5902	95.0428
2410015M20Rik	349.894	238.76	175.842	699.416	567.769	513.574	708.57	1.30126	2.18592e-15	1.08403e-14	254.832	622.332
2410016O06Rik	66.3322	36.9509	45.911	240.234	288.164	271.46	241.136	2.40215	3.96413e-32	4.22323e-31	49.7314	260.249
2410021H03Rik	1.88622	0.710594	2.40058	0	2.85311	0	0	-1.00405	0.482839	0.548448	1.6658	0.713278
2410089E03Rik	614.28	665.116	750.78	240.234	176.893	293.471	166.941	-1.58999	1.04926e-19	6.57924e-19	676.725	219.385
2410127L17Rik	86.7663	101.615	106.225	85.1463	59.9153	44.0206	70.486	-0.628533	0.00779491	0.0133413	98.2022	64.8921
2410131K14Rik	132.664	105.879	88.8213	225.03	142.656	159.575	155.811	0.646721	0.00209474	0.00389987	109.121	170.768
2500002B13Rik	11.3173	14.5672	16.2039	24.3275	17.1187	11.0051	18.5489	0.310253	0.491513	0.556914	14.0295	17.7501
2500004C02Rik	39.2963	48.6757	60.3144	12.1638	5.70622	20.1761	11.1294	-1.88816	6.05287e-06	1.52142e-05	49.4288	12.2939
2510002D24Rik	65.3891	78.1653	73.8177	76.0235	51.356	64.1967	74.1958	-0.128939	0.557186	0.619846	72.4574	66.443
2510003B16Rik	2.20059	3.55297	1.20029	6.08188	0	3.66838	0	0.16318	0.89992	0.920192	2.31795	2.43757
2510009E07Rik	798.187	936.563	946.727	121.638	131.243	154.072	166.941	-2.6303	4.89453e-56	1.12142e-54	893.826	143.473
2510039O18Rik	189.565	109.076	103.825	544.328	496.441	458.548	448.885	1.89085	5.05339e-29	4.77512e-28	134.155	487.05
2610001J05Rik	211.571	408.592	362.487	142.924	91.2995	80.7044	111.294	-1.57372	1.01359e-14	4.82945e-14	327.55	106.555
2610002M06Rik	326.317	376.26	494.518	273.685	245.367	205.429	293.073	-0.643487	4.35572e-05	9.95948e-05	399.032	254.389
2610005L07Rik	70.1046	58.624	67.8162	66.9007	82.7402	73.3676	37.0979	0.0164802	0.944946	0.957076	65.515	65.0266
2610008E11Rik	489.161	626.744	756.181	218.948	199.718	210.932	204.038	-1.54322	8.89499e-31	8.98868e-30	624.029	208.409
2610015P09Rik	86.4519	104.457	105.025	136.842	99.8589	150.404	74.1958	0.276518	0.21203	0.269929	98.6448	115.325
2610016A17Rik	357.754	413.566	365.488	9.12282	2.85311	9.17096	7.41958	-5.67192	7.51201e-32	7.89836e-31	378.936	7.14162
2610020C07Rik	33.6377	45.8333	41.4099	9.12282	34.2373	27.5129	22.2587	-0.749588	0.0473357	0.07043	40.2936	23.2829
2610020H08Rik	100.913	94.1537	118.528	57.7779	37.0904	60.5283	33.3881	-1.10848	0.000207494	0.00043956	104.532	47.1962
2610027K06Rik	11.3173	5.32945	9.6023	3.04094	8.55933	14.6735	0	-0.343735	0.646066	0.701574	8.7497	6.56845
2610028H24Rik	0.628741	0	0.300072	0	2.85311	3.66838	3.70979	3.08488	0.0327391	0.0502392	0.309604	2.55782
2610035D17Rik	40.5538	25.5814	42.6102	109.474	68.4746	71.5335	103.874	1.27785	3.02304e-05	7.03903e-05	36.2485	88.339
2610037D02Rik	2.51496	2.48708	0.300072	42.5732	59.9153	73.3676	29.6783	5.01361	5.70787e-19	3.43489e-18	1.76737	51.3836
2610042L04Rik	2.20059	1.06589	1.80043	3.04094	0	0	0	-1.01561	0.537259	0.601004	1.68897	0.760235
2610044O15Rik8	187.05	246.576	259.562	97.3101	68.4746	58.6941	85.3252	-1.58114	1.45274e-12	6.09162e-12	231.063	77.451
2610203C22Rik	49.6705	51.8734	82.8198	45.6141	68.4746	78.8702	48.2273	0.0360264	0.911409	0.929857	61.4546	60.2966
2610206C17Rik	1.88622	4.26356	4.80115	3.04094	0	0	0	-1.89337	0.208158	0.2657	3.65031	0.760235
2610301B20Rik	122.29	187.597	171.641	66.9007	65.6215	56.8599	44.5175	-1.40645	7.5876e-10	2.65158e-09	160.509	58.4749
2610305D13Rik	168.503	240.891	287.769	30.4094	28.5311	34.8496	51.9371	-2.6497	1.45252e-23	1.08817e-22	232.388	36.4318
2610306M01Rik	17.9191	15.9884	15.3037	9.12282	8.55933	14.6735	7.41958	-0.649049	0.18646	0.240919	16.4037	9.94381
2610307P16Rik	122.919	46.1886	89.4214	18.2456	22.8249	56.8599	40.8077	-1.28258	0.000254867	0.00053389	86.1763	34.6845
2610316D01Rik	0	0.355297	0.600144	0	0	1.83419	0	1.79888	0.305584	0.370297	0.31848	0.458548
2610318N02Rik	2.51496	1.42119	0	3.04094	0	0	0	-0.298701	0.844894	0.874678	1.31205	0.760235
2610507B11Rik	4568.75	5069.38	4239.42	5662.23	6801.81	5986.8	5687.11	0.383558	0.000878162	0.00172066	4625.85	6034.49
2610507I01Rik	174.161	169.832	197.447	510.878	496.441	506.237	626.954	1.56636	5.50957e-32	5.82924e-31	180.48	535.128
2610524H06Rik	34.2664	63.9535	59.7143	24.3275	17.1187	12.8393	11.1294	-1.63769	4.16841e-05	9.54799e-05	52.6447	16.3537
2610528A11Rik	2.20059	2.48708	0.600144	3.04094	2.85311	0	0	-0.305163	0.790816	0.828497	1.76261	1.47351
2610528J11Rik	5.02993	6.75064	3.90093	115.556	94.1526	117.388	155.811	4.53824	1.94736e-51	3.924e-50	5.22717	120.727
2700029M09Rik	174.79	209.27	227.154	106.433	88.4464	80.7044	100.164	-1.12641	1.85461e-09	6.30121e-09	203.738	93.937
2700038G22Rik	14.461	12.7907	21.6052	3.04094	14.2656	31.1812	18.5489	0.11235	0.803613	0.839557	16.2856	16.7592
2700046G09Rik	32.6945	38.3721	35.4085	18.2456	17.1187	14.6735	25.9685	-0.936887	0.0240618	0.037856	35.4917	19.0016
2700049A03Rik	234.835	200.743	258.062	142.924	142.656	170.58	111.294	-0.68475	0.00127904	0.00245459	231.213	141.863
2700054A10Rik	17.2904	18.8307	25.5061	3.04094	2.85311	9.17096	3.70979	-2.00873	0.00129864	0.00248964	20.5424	4.6937
2700060E02Rik	873.95	1037.47	1116.57	2298.95	2005.74	1843.36	2745.24	1.14108	2.05279e-16	1.07517e-15	1009.33	2223.32
2700062C07Rik	124.176	117.959	105.625	152.047	136.949	110.051	96.4545	0.0904982	0.611082	0.669916	115.92	123.876
2700069I18Rik	5.3443	5.32945	6.30151	3.04094	0	0	0	-2.78207	0.0710045	0.101617	5.65842	0.760235
2700070H01Rik	1.25748	0	1.50036	0	0	0	0	-16.0427	2.77658e-05	NA	0.919281	0
2700081O15Rik	282.934	267.183	263.463	57.7779	94.1526	124.725	96.4545	-1.5223	5.44293e-16	2.78008e-15	271.193	93.2775
2700094K13Rik	52.8143	54.7157	52.8127	88.1872	57.0622	55.0257	48.2273	0.205373	0.499026	0.563988	53.4475	62.1256
2700097O09Rik	49.0418	57.2028	65.1156	21.2866	31.3842	40.3522	59.3566	-0.583086	0.0739091	0.105355	57.1201	38.0949
2700099C18Rik	29.5508	15.9884	27.6066	0	2.85311	5.50257	11.1294	-2.3765	0.00114362	0.00220951	24.3819	4.87126
2810001G20Rik	32.0658	40.8592	45.0108	39.5322	48.5029	38.518	44.5175	0.135468	0.625532	0.682965	39.3119	42.7676
2810002D19Rik	43.6975	56.8475	73.2175	33.4503	34.2373	22.0103	22.2587	-1.02333	0.00189349	0.00354749	57.9209	27.9892
2810004N23Rik	192.08	190.794	186.345	264.562	248.221	220.103	233.717	0.342018	0.013634	0.0224018	189.74	241.651
2810006K23Rik	99.3411	102.681	86.1206	69.9416	48.5029	49.5232	77.9056	-0.685531	0.00645256	0.0111786	96.0475	61.4683
2810013P06Rik	103.742	131.105	141.934	51.696	77.034	95.3779	92.7447	-0.633691	0.00124726	0.00239823	125.594	79.2132
2810021J22Rik	77.9639	83.8501	103.825	42.5732	59.9153	45.8548	74.1958	-0.693386	0.00468129	0.0082912	88.5463	55.6348
2810025M15Rik	94.3112	83.1395	78.9189	51.696	57.0622	40.3522	59.3566	-0.754588	0.000942512	0.00184055	85.4565	52.1168
2810029C07Rik	8.48801	8.52713	8.40201	3.04094	5.70622	5.50257	0	-1.09781	0.171705	0.224336	8.47238	3.56243
2810032G03Rik	31.1227	78.8759	44.4106	215.907	108.418	106.383	118.713	1.47177	2.12958e-06	5.60737e-06	51.4698	137.355
2810047C21Rik1	2.82934	3.19767	1.20029	0	8.55933	0	3.70979	0.249013	0.833757	0.864789	2.4091	3.06728
2810403A07Rik	637.229	688.566	721.373	705.498	793.165	764.858	660.343	0.109647	0.28689	0.350937	682.389	730.966
2810403D21Rik	27.0359	34.4638	30.0072	12.1638	8.55933	11.0051	7.41958	-1.60446	0.00115502	0.00222976	30.5023	9.78695
2810408A11Rik	24.8353	8.17183	15.0036	42.5732	25.678	27.5129	18.5489	0.905315	0.0302176	0.0466582	16.0036	28.5782
2810408I11Rik	1.88622	4.97416	1.80043	0	5.70622	3.66838	0	-0.00304322	0.997313	0.998654	2.88694	2.34365
2810410L24Rik	21.0628	18.4754	24.0058	27.3685	28.5311	36.6838	22.2587	0.468386	0.158227	0.208573	21.1813	28.7105
2810417H13Rik	134.865	45.8333	104.725	3.04094	8.55933	12.8393	3.70979	-3.5995	2.36389e-08	7.38923e-08	95.1411	7.03735
2810428I15Rik	58.4729	27.7132	16.2039	109.474	105.565	80.7044	96.4545	1.64392	1.46357e-11	5.77424e-11	34.13	98.0495
2810429I04Rik	2.51496	0.710594	4.20101	0	0	0	0	-2.31934	0.136704	0.183293	2.47552	0
2810433D01Rik	6.28741	12.0801	11.1027	0	2.85311	3.66838	3.70979	-1.81495	0.0395739	0.0597127	9.82339	2.55782
2810442N19Rik	10.0599	20.6072	15.6037	0	2.85311	9.17096	3.70979	-1.69341	0.0245385	0.038552	15.4236	3.93346
2810454H06Rik	15.4042	13.5013	20.1048	15.2047	14.2656	11.0051	7.41958	-0.429834	0.368243	0.434866	16.3368	11.9737
2810459M11Rik	8.17363	6.39535	9.30223	136.842	202.571	104.549	133.552	4.16536	1.12698e-29	1.09056e-28	7.95707	144.379
2810468N07Rik	15.7185	13.146	11.7028	6.08188	2.85311	3.66838	0	-2.02464	0.00809259	0.0138143	13.5224	3.15084
2810474O19Rik	856.345	1330.23	1183.18	623.393	796.018	880.412	615.825	-0.580909	0.000219007	0.000462789	1123.25	728.912
2900005J15Rik	24.2065	25.5814	20.705	6.08188	31.3842	38.518	25.9685	0.158455	0.702913	0.751275	23.4976	25.4882
2900008C10Rik	5.02993	2.13178	2.1005	0	8.55933	9.17096	7.41958	1.11108	0.15869	0.209117	3.0874	6.28747
2900009J06Rik	0.314371	0.710594	0.300072	6.08188	2.85311	1.83419	3.70979	2.96986	0.0233039	0.0367525	0.441679	3.61974
2900011O08Rik	0.628741	2.13178	0.300072	0	0	0	0	-0.902503	0.7263	NA	1.0202	0
2900026A02Rik	361.841	323.676	328.879	310.176	393.729	319.149	307.913	-0.0257053	0.86538	0.892113	338.132	332.742
2900041M22Rik	7.23052	6.04005	2.40058	0	0	3.66838	3.70979	-1.35624	0.216572	0.274945	5.22372	1.84454
2900057B20Rik	15.4042	10.3036	10.5025	3.04094	2.85311	3.66838	7.41958	-1.56287	0.0320552	0.0492703	12.0701	4.2455
2900060B14Rik	5.65867	6.75064	9.00216	0	5.70622	3.66838	11.1294	-0.545161	0.428972	0.495222	7.13716	5.12599
2900076A07Rik	71.0477	99.4832	72.3173	30.4094	42.7967	62.3625	59.3566	-0.700809	0.0208379	0.0331202	80.9494	48.7313
2900097C17Rik	1706.72	2268.93	2327.36	1578.25	1703.31	1581.07	1469.08	-0.379825	1.15684e-05	2.82003e-05	2101	1582.93
3000002C10Rik	7.23052	7.81653	9.00216	12.1638	22.8249	20.1761	18.5489	1.24125	0.0020274	0.0037841	8.0164	18.4284
3010001F23Rik	3.77245	4.26356	5.10122	3.04094	0	1.83419	3.70979	-1.14575	0.3043	0.3689	4.37908	2.14623
3010026O09Rik	46.5268	29.1344	30.9074	39.5322	25.678	27.5129	29.6783	-0.221182	0.475586	0.541448	35.5229	30.6003
3110001I22Rik	47.47	59.6899	57.0137	21.2866	25.678	49.5232	51.9371	-0.536455	0.0744349	0.106023	54.7245	37.1062
3110002H16Rik	354.296	389.05	262.863	328.421	333.814	267.792	345.01	-0.0840929	0.636441	0.692725	335.403	318.759
3110009E18Rik	9.74549	17.0543	19.5047	18.2456	11.4124	7.33676	3.70979	-0.51864	0.326295	0.391684	15.4348	10.1762
3110021A11Rik	3.14371	1.77648	1.50036	0	2.85311	3.66838	0	-0.186577	0.872606	0.898136	2.14018	1.63037
3110021N24Rik	57.2154	50.8075	83.1199	12.1638	19.9718	23.8445	22.2587	-1.67247	1.62277e-05	3.89124e-05	63.7143	19.5597
3110035E14Rik	21.0628	22.0284	20.4049	0	11.4124	45.8548	22.2587	-0.0339292	0.962125	0.970285	21.1654	19.8815
3110039I08Rik	247.095	279.263	321.977	39.5322	37.0904	86.207	81.6154	-2.1767	1.62661e-18	9.51399e-18	282.779	61.1113
3110040N11Rik	87.395	105.879	83.42	188.538	148.362	198.093	181.78	0.972507	6.84985e-08	2.06584e-07	92.2312	179.193
3110043O21Rik	1577.51	2324	1830.74	225.03	233.955	260.455	237.427	-2.9775	2.74769e-66	8.22651e-65	1910.75	239.217
3110045C21Rik	13.5179	22.0284	24.906	15.2047	42.7967	53.1915	55.6468	1.1418	0.00459917	0.00815687	20.1508	41.7099
3110052M02Rik	112.859	151.712	192.346	91.2282	128.39	122.891	133.552	-0.304583	0.10876	0.149153	152.306	119.015
3110056K07Rik	67.2753	74.2571	111.927	60.8188	99.8589	95.3779	77.9056	0.0353805	0.880909	0.905028	84.4864	83.4903
3110057O12Rik	70.419	93.0878	117.628	121.638	119.831	124.725	118.713	0.42322	0.0293348	0.0453823	93.7117	121.227
3110062M04Rik	42.1257	42.9909	55.2132	21.2866	17.1187	40.3522	29.6783	-0.75071	0.028539	0.0442768	46.7766	27.1089
3110070M22Rik	2.20059	2.13178	4.50108	0	2.85311	7.33676	3.70979	0.389129	0.676325	0.728065	2.94448	3.47492
3110079O15Rik	2.82934	0.355297	0.600144	0	0	1.83419	0	-0.117375	0.937523	0.951326	1.26159	0.458548
3110082I17Rik	18.5479	17.7648	15.6037	79.0644	65.6215	45.8548	48.2273	1.76056	3.2737e-12	1.34109e-11	17.3055	59.692
3200001D21Rik	6.60178	8.17183	9.90237	3.04094	11.4124	9.17096	11.1294	0.113959	0.840933	0.871539	8.22533	8.68843
3300002I08Rik	19.8053	25.2261	24.6059	12.1638	11.4124	5.50257	18.5489	-1.05297	0.032751	0.0502484	23.2124	11.9069
3300005D01Rik	1.57185	1.06589	5.10122	0	2.85311	0	0	-1.40204	0.374871	0.441674	2.57966	0.713278
3425401B19Rik	15.4042	14.5672	12.9031	0	0	1.83419	0	-4.08649	0.0022514	0.00417129	14.2915	0.458548
3632451O06Rik	71.0477	72.4806	75.6181	18.2456	19.9718	20.1761	18.5489	-1.90271	3.03571e-08	9.39189e-08	73.0488	19.2356
3632454L22Rik	14.1467	20.9625	33.308	9.12282	14.2656	5.50257	11.1294	-1.15433	0.027063	0.0421963	22.8057	10.0051
3830403N18Rik	4.40119	6.04005	9.00216	0	0	0	0	-3.61187	0.0362355	0.0551069	6.48113	0
3830406C13Rik	284.82	481.427	424.002	218.948	253.927	258.621	356.14	-0.507703	0.00164004	0.00310119	396.75	271.909
3830408C21Rik	9.74549	11.3695	19.2046	0	2.85311	5.50257	0	-2.34114	0.0123631	0.020441	13.4399	2.08892
3830417A13Rik	10.6886	24.8708	12.9031	3.04094	2.85311	0	0	-3.48561	0.00287844	0.00526603	16.1542	1.47351
3830432H09Rik	7.54489	2.84238	4.50108	3.04094	2.85311	3.66838	0	-0.930668	0.345252	0.411457	4.96278	2.39061
3930402G23Rik	6.28741	7.46124	4.80115	3.04094	0	7.33676	3.70979	-0.660481	0.421683	0.487975	6.18327	3.52187
4430402I18Rik	54.0717	64.6641	66.3159	9.12282	2.85311	1.83419	7.41958	-3.68987	2.24062e-09	7.55796e-09	61.6839	5.30742
4631405J19Rik	5.02993	2.13178	4.80115	45.6141	62.7684	78.8702	33.3881	3.81664	2.03586e-17	1.12492e-16	3.98762	55.1602
4632404H12Rik	27.3502	24.1602	31.2075	69.9416	99.8589	121.057	103.874	1.85067	1.01258e-14	4.82596e-14	27.5726	98.6828
4632415L05Rik	124.176	142.119	183.644	200.702	168.333	150.404	211.458	0.289996	0.0949844	0.132118	149.98	182.724
4632427E13Rik	55.958	45.1227	56.4135	18.2456	62.7684	62.3625	70.486	0.017424	0.956926	0.96608	52.4981	53.4656
4632428C04Rik	5.97304	7.46124	6.60158	0	0	5.50257	0	-1.88311	0.0812708	0.114706	6.67862	1.37564
4632428N05Rik	1391.09	1448.19	1349.72	361.872	302.43	368.672	281.944	-2.07666	5.98943e-57	1.41056e-55	1396.33	328.729
4732416N19Rik	1.25748	1.42119	2.40058	0	5.70622	1.83419	0	0.253745	0.843059	0.873207	1.69308	1.8851
4732456N10Rik	0	0	0	0	0	0	0	0	1	NA	0	0
4732471J01Rik	68.2184	83.1395	67.8162	24.3275	51.356	75.2018	37.0979	-0.62275	0.0355056	0.0540962	73.0581	46.9958
4732490B19Rik	5.3443	3.55297	6.60158	85.1463	68.4746	78.8702	103.874	4.01693	3.40829e-24	2.62557e-23	5.16628	84.0913
4732491K20Rik	23.2634	24.8708	19.2046	12.1638	8.55933	14.6735	37.0979	-0.385914	0.381546	0.448505	22.4463	18.1236
4831440E17Rik	60.3591	87.0478	86.1206	97.3101	79.8871	93.5437	103.874	0.301173	0.138006	0.184759	77.8425	93.6538
4833411C07Rik	2.51496	1.42119	3.60086	6.08188	8.55933	7.33676	25.9685	2.18551	0.00582	0.0101683	2.51234	11.9866
4833412C05Rik	1.57185	1.77648	0.900216	3.04094	2.85311	1.83419	0	0.482519	0.759943	0.801924	1.41618	1.93206
4833417C18Rik	11.6317	8.17183	9.00216	0	0	1.83419	3.70979	-2.84394	0.00862264	0.0146643	9.6019	1.386
4833418N02Rik	18.8622	19.5413	25.206	36.4913	22.8249	16.5077	22.2587	0.18997	0.635288	0.691783	21.2032	24.5207
4833419F23Rik	9.74549	11.7248	13.2032	3.04094	0	3.66838	0	-2.55908	0.0136513	0.0224259	11.5578	1.67733
4833420G17Rik	387.619	412.5	490.918	307.135	425.113	346.662	326.462	-0.276923	0.125068	0.169074	430.345	351.343
4833422C13Rik	25.1496	30.9108	30.3073	6.08188	14.2656	18.3419	7.41958	-1.21422	0.00790367	0.013511	28.7892	11.5272
4833427F10Rik	0.628741	1.06589	1.50036	0	8.55933	1.83419	0	1.44684	0.280849	0.344418	1.065	2.59838
4833427G06Rik	0.314371	0	0	3.04094	11.4124	7.33676	11.1294	6.26188	5.40083e-06	1.363e-05	0.10479	8.22988
4833439L19Rik	1065.4	1252.07	1002.24	2177.31	1908.73	1740.65	1981.03	0.813644	6.00518e-14	2.73916e-13	1106.57	1951.93
4921504A21Rik	5.97304	4.61886	5.40129	3.04094	0	0	0	-2.67514	0.032329	0.0496596	5.33107	0.760235
4921506M07Rik	8.48801	14.5672	21.6052	0	0	0	0	-4.68559	0.000128735	0.000278659	14.8868	0
4921507L20Rik	16.976	15.6331	16.504	3.04094	14.2656	33.0154	3.70979	-0.215458	0.701858	0.750337	16.371	13.5079
4921507P07Rik	17.6048	23.0943	21.3051	30.4094	37.0904	29.3471	18.5489	0.514129	0.185047	0.239368	20.6681	28.849
4921511C10Rik	23.5778	33.0426	35.1084	3.04094	17.1187	16.5077	7.41958	-1.34412	0.00370544	0.00666238	30.5763	11.0217
4921511H03Rik	1.57185	1.06589	0.600144	0	2.85311	5.50257	0	1.21205	0.254679	0.31703	1.0793	2.08892
4921511I17Rik	15.7185	24.5155	22.2053	3.04094	0	3.66838	0	-3.40719	0.000892284	0.00174671	20.8131	1.67733
4921513I03Rik	10.0599	8.52713	11.1027	3.04094	0	1.83419	7.41958	-1.85034	0.0393777	0.0594433	9.89655	3.07368
4921518K17Rik	14.7754	11.7248	18.6045	0	0	0	0	-4.88547	0.000124779	0.000270686	15.0349	0
4921524J17Rik	72.3052	101.97	120.629	212.866	154.068	225.606	178.07	1.02813	5.82217e-08	1.76315e-07	98.3015	192.652
4921525O09Rik	0	3.19767	0.600144	0	0	0	0	-0.241864	0.918639	NA	1.26594	0
4921531C22Rik	66.9609	79.5865	76.2183	36.4913	57.0622	66.0309	40.8077	-0.518811	0.0417676	0.0627312	74.2552	50.098
4921534H16Rik	4.71556	3.55297	3.30079	0	0	0	0	-2.92675	0.0927945	0.129349	3.85644	0
4921536K21Rik	4.71556	4.26356	3.60086	9.12282	19.9718	5.50257	14.8392	1.50156	0.0194452	0.0311092	4.19333	12.3591
4930402H24Rik	2223.54	2678.58	2115.21	261.521	476.469	407.19	356.14	-2.63784	1.66558e-47	2.97618e-46	2339.11	375.33
4930404H11Rik	3.77245	3.90827	4.50108	0	2.85311	0	0	-2.26827	0.114869	0.156741	4.0606	0.713278
4930404I05Rik	11.3173	15.9884	12.9031	9.12282	11.4124	14.6735	14.8392	-0.0712999	0.880839	0.905028	13.4029	12.512
4930404N11Rik	23.8922	8.52713	6.30151	66.9007	111.271	75.2018	70.486	2.8532	2.36079e-25	1.90556e-24	12.9069	80.965
4930405A10Rik	8.80238	12.7907	7.20173	3.04094	2.85311	7.33676	7.41958	-0.970014	0.209077	0.266672	9.59826	5.1626
4930405A21Rik	4.40119	4.26356	8.10194	0	5.70622	3.66838	0	-1.07277	0.272689	0.335908	5.5889	2.34365
4930405J17Rik	4.08682	2.48708	5.70137	6.08188	45.6498	60.5283	29.6783	3.10782	7.83176e-08	2.3461e-07	4.09175	35.4846
4930405O22Rik	38.3532	36.2403	61.5147	12.1638	22.8249	71.5335	48.2273	-0.199784	0.660497	0.714442	45.3694	38.6873
4930406D18Rik	0	0	0.300072	0	2.85311	7.33676	3.70979	5.02634	0.00400028	0.00715787	0.100024	3.47492
4930412C18Rik	45.2694	72.4806	81.9196	12.1638	11.4124	23.8445	33.3881	-1.66549	8.54712e-06	2.11282e-05	66.5565	20.2022
4930412O13Rik	55.958	38.3721	52.2125	142.924	179.746	188.922	140.972	1.74852	2.48042e-18	1.43735e-17	48.8475	163.141
4930413F20Rik	1.57185	1.42119	2.40058	24.3275	31.3842	40.3522	29.6783	4.17414	5.67153e-16	2.89246e-15	1.79787	31.4356
4930413G21Rik	0.314371	0.710594	0	0	11.4124	3.66838	11.1294	4.25461	0.000620677	0.00123754	0.341655	6.55255
4930414N06Rik	6.28741	7.10594	8.10194	3.04094	5.70622	1.83419	0	-1.4046	0.111777	0.1529	7.1651	2.64534
4930415F15Rik	2.82934	1.77648	1.80043	0	0	0	3.70979	-1.38551	0.36534	0.431921	2.13542	0.927447
4930415O20Rik	6.91615	8.88242	7.5018	24.3275	31.3842	45.8548	22.2587	2.04771	7.70642e-07	2.1084e-06	7.76679	30.9563
4930419G24Rik	1.25748	6.04005	1.50036	3.04094	0	1.83419	0	-0.922117	0.557357	0.619995	2.93263	1.21878
4930425L21Rik	5.97304	9.23772	6.00144	0	0	0	0	-3.77633	0.0246602	0.0387252	7.07073	0
4930426L09Rik	1.57185	4.97416	3.00072	3.04094	2.85311	5.50257	3.70979	0.523793	0.611305	0.670032	3.18224	3.7766
4930427A07Rik	33.952	7.46124	15.3037	57.7779	14.2656	27.5129	22.2587	0.732461	0.116241	0.158396	18.9056	30.4538
4930429B21Rik	5.97304	6.39535	7.20173	3.04094	2.85311	3.66838	3.70979	-0.965533	0.268023	0.331199	6.52337	3.31806
4930429F24Rik	16.976	22.739	30.9074	12.1638	8.55933	12.8393	18.5489	-0.82095	0.0748962	0.106618	23.5408	13.0278
4930430F08Rik	64.7603	76.0336	85.8206	60.8188	25.678	34.8496	40.8077	-0.910971	0.00119905	0.00231053	75.5381	40.5385
4930431P03Rik	7.85926	6.39535	4.50108	127.719	222.543	276.963	267.105	5.1728	1.34423e-57	3.22882e-56	6.2519	223.582
4930432J09Rik	1.57185	1.42119	2.70065	0	0	1.83419	0	-1.16008	0.497604	NA	1.8979	0.458548
4930432K21Rik	12.8892	5.68475	7.5018	6.08188	5.70622	5.50257	3.70979	-0.667581	0.307025	0.37183	8.69191	5.25012
4930438E09Rik	16.0329	23.8049	31.8076	0	2.85311	12.8393	0	-2.38504	0.00554091	0.00971688	23.8818	3.92311
4930443O20Rik	16.6616	14.2119	18.3044	9.12282	11.4124	11.0051	14.8392	-0.530739	0.291652	0.356021	16.3926	11.5949
4930444F02Rik	0.314371	0.355297	0.900216	0	0	5.50257	3.70979	2.28069	0.141737	0.189036	0.523294	2.30309
4930444M15Rik	2.51496	1.06589	1.20029	0	0	1.83419	0	-0.888528	0.67051	NA	1.59371	0.458548
4930445N18Rik	1.57185	3.55297	1.80043	0	0	0	7.41958	-0.66279	0.631905	0.688499	2.30842	1.85489
4930447A16Rik	1.25748	1.42119	2.70065	0	0	0	0	-1.76288	0.176716	0.230125	1.79311	0
4930447C04Rik	1.57185	8.17183	6.00144	0	0	0	0	-3.02644	0.103642	0.142888	5.24837	0
4930447K03Rik	1.57185	3.19767	4.80115	3.04094	0	3.66838	0	-0.689009	0.57338	0.63485	3.19023	1.67733
4930447M23Rik	1.57185	0.710594	0	0	0	0	0	-0.182385	0.925672	NA	0.760816	0
4930447N08Rik	1.25748	1.42119	3.30079	0	0	0	3.70979	-1.17022	0.408696	0.475947	1.99315	0.927447
4930449E18Rik	14.461	18.8307	25.206	3.04094	11.4124	5.50257	11.1294	-1.3389	0.0216952	0.0343857	19.4993	7.77133
4930451G09Rik	17.2904	6.39535	8.10194	54.7369	91.2995	106.383	140.972	3.28997	8.2899e-22	5.74173e-21	10.5959	98.3479
4930452B06Rik	1.88622	2.48708	2.1005	0	0	0	0	-2.12688	0.113324	0.154784	2.15794	0
4930453N24Rik	411.197	589.438	544.63	437.895	410.848	352.165	408.077	-0.340639	0.00407975	0.00728693	515.088	402.246
4930455C13Rik	6.28741	11.3695	10.2024	6.08188	5.70622	11.0051	3.70979	-0.313264	0.610607	0.669526	9.28645	6.62576
4930455G09Rik	5.02993	4.97416	6.00144	0	2.85311	1.83419	0	-2.0087	0.0762353	0.108296	5.33517	1.17183
4930455H04Rik	4.40119	6.04005	13.5032	0	0	3.66838	0	-2.49647	0.0334719	0.0512565	7.98149	0.917096
4930465K10Rik	2.20059	0.355297	0.300072	0	2.85311	1.83419	0	1.05715	0.546363	NA	0.951988	1.17183
4930471G03Rik	0.314371	0.710594	1.20029	3.04094	2.85311	3.66838	0	2.09032	0.0907379	0.126684	0.741751	2.39061
4930471M09Rik	0.943112	0.355297	1.50036	0	0	1.83419	0	-0.111455	0.960972	NA	0.932923	0.458548
4930473A02Rik	14.7754	15.2778	23.7057	6.08188	14.2656	20.1761	11.1294	-0.366124	0.444005	0.51031	17.9196	12.9132
4930474M22Rik	7.23052	7.46124	9.30223	0	2.85311	0	0	-3.20901	0.0115869	0.0192595	7.998	0.713278
4930478L05Rik	10.3742	8.88242	13.5032	3.04094	11.4124	11.0051	0	-0.66156	0.315693	0.380853	10.92	6.36463
4930479D17Rik	3.14371	0.710594	1.50036	0	0	1.83419	3.70979	-0.319093	0.815434	0.849388	1.78489	1.386
4930480G23Rik	4.71556	8.88242	7.5018	9.12282	0	0	7.41958	-0.879707	0.405804	0.472906	7.03326	4.1356
4930480K15Rik	2.20059	0	3.90093	0	0	1.83419	0	-1.22325	0.544248	0.607695	2.03384	0.458548
4930480K23Rik	54.3861	64.6641	73.8177	63.8597	79.8871	62.3625	48.2273	0.0181807	0.940334	0.953548	64.2893	63.5841
4930481A15Rik	28.2934	9.94832	17.4042	82.1054	57.0622	88.0412	40.8077	1.92922	2.62541e-09	8.81364e-09	18.5486	67.0041
4930482G09Rik	0.314371	1.06589	0.900216	0	0	0	3.70979	0.412202	0.795132	0.832399	0.760159	0.927447
4930483K19Rik	0.314371	0.710594	0.900216	3.04094	2.85311	3.66838	11.1294	3.04185	0.00328354	0.00595296	0.641727	5.17295
4930483O08Rik	0	2.48708	1.50036	0	0	1.83419	0	0.429117	0.830917	NA	1.32915	0.458548
4930486L24Rik	27.0359	57.5581	51.0122	6.08188	11.4124	5.50257	11.1294	-2.37592	8.66303e-06	2.13928e-05	45.2021	8.53157
4930487H11Rik	22.0059	28.4238	27.0065	0	0	11.0051	18.5489	-1.80579	0.0138819	0.0227759	25.8121	7.38852
4930488L21Rik	0.628741	2.84238	2.1005	0	0	0	0	-1.5786	0.329143	NA	1.85721	0
4930502A04Rik	0.628741	4.26356	2.1005	0	0	0	0	-1.81472	0.37282	NA	2.33094	0
4930502E09Rik	5.02993	5.68475	11.1027	3.04094	5.70622	9.17096	0	-0.511589	0.520472	0.584977	7.27245	4.47953
4930502E18Rik	2.20059	7.10594	1.50036	0	0	0	0	-2.7461	0.319573	NA	3.6023	0
4930503B20Rik	0	1.77648	0.600144	6.08188	0	1.83419	0	1.95662	0.278378	0.341843	0.79221	1.97902
4930503L19Rik	126.377	159.173	178.243	36.4913	51.356	44.0206	66.7762	-1.64845	2.21588e-12	9.18442e-12	154.598	49.661
4930505A04Rik	6.28741	13.5013	10.5025	0	0	0	0	-4.24944	0.00195904	0.00366257	10.0971	0
4930506A18Rik	9.74549	8.52713	13.5032	3.04094	0	0	0	-3.67217	0.0036306	0.00654143	10.5919	0.760235
4930506C21Rik	15.0898	20.9625	22.8055	15.2047	51.356	80.7044	11.1294	1.05774	0.0403821	0.0608398	19.6193	39.5986
4930507D05Rik	3.45808	5.32945	5.40129	6.08188	14.2656	5.50257	11.1294	0.971096	0.127471	0.17202	4.72961	9.24484
4930509E16Rik	0.943112	0.710594	0.600144	6.08188	2.85311	1.83419	3.70979	2.20118	0.0500993	0.07415	0.751283	3.61974
4930511A08Rik	9.74549	13.146	18.9045	0	2.85311	1.83419	0	-3.30216	0.00222638	0.00413083	13.932	1.17183
4930511E03Rik	5.3443	6.04005	4.20101	3.04094	0	1.83419	0	-1.94987	0.166391	0.218008	5.19512	1.21878
4930511M06Rik	2.20059	2.48708	3.00072	0	0	3.66838	7.41958	0.0435539	0.964881	0.972408	2.5628	2.77199
4930512B01Rik	29.5508	35.885	42.9103	6.08188	28.5311	36.6838	11.1294	-0.721492	0.0986562	0.136718	36.1154	20.6065
4930512J16Rik	11.003	13.8566	14.4035	0	0	0	0	-4.6504	0.000445139	0.000904962	13.0877	0
4930513N10Rik	8.80238	7.81653	6.60158	3.04094	5.70622	14.6735	0	-0.203082	0.766782	0.807728	7.74016	5.85517
4930515G01Rik	13.8323	21.3178	13.8033	21.2866	14.2656	14.6735	18.5489	0.0726172	0.877662	0.902625	16.3178	17.1937
4930517E11Rik	1.25748	0.710594	2.1005	0	0	0	0	-1.36431	0.557202	NA	1.35619	0
4930520O04Rik	13.8323	9.59302	14.7035	6.08188	5.70622	9.17096	7.41958	-0.832043	0.145591	0.193793	12.7096	7.09466
4930521E06Rik	12.8892	9.94832	24.3058	0	22.8249	22.0103	14.8392	-0.0479232	0.946347	0.958187	15.7144	14.9186
4930523C07Rik	257.155	345.704	317.776	33.4503	42.7967	95.3779	55.6468	-2.36634	2.65097e-17	1.45812e-16	306.878	56.8179
4930525G20Rik	24.5209	35.5297	39.6095	15.2047	11.4124	14.6735	11.1294	-1.25781	0.00335618	0.00607533	33.22	13.105
4930526I15Rik	5.97304	2.48708	0.900216	6.08188	22.8249	11.0051	11.1294	2.2814	0.000507185	0.00102261	3.12011	12.7603
4930526L06Rik	1.25748	1.77648	3.00072	0	0	0	0	-1.90438	0.456238	NA	2.01156	0
4930528A17Rik	3.77245	1.06589	3.00072	0	5.70622	0	0	-0.813639	0.530712	0.594665	2.61302	1.42656
4930532I03Rik	3.14371	2.48708	6.30151	0	0	0	0	-2.98543	0.0487485	0.0723345	3.97743	0
4930533B01Rik	4.40119	8.17183	8.40201	0	17.1187	16.5077	0	0.468396	0.516622	0.581114	6.99168	8.4066
4930538K18Rik	1.25748	2.48708	3.90093	6.08188	5.70622	3.66838	3.70979	1.01752	0.319901	0.385214	2.5485	4.79157
4930539E08Rik	2.82934	2.84238	3.60086	0	0	0	3.70979	-1.83771	0.105136	0.144712	3.09086	0.927447
4930539J05Rik	6.28741	12.7907	12.603	6.08188	11.4124	16.5077	7.41958	0.136205	0.798611	0.835213	10.5604	10.3554
4930545L23Rik	23.2634	30.2002	33.308	0	11.4124	14.6735	0	-1.93822	0.00449569	0.00798426	28.9239	6.52149
4930546C10Rik	1.25748	0.710594	0	18.2456	14.2656	5.50257	22.2587	4.64437	3.31494e-07	9.38409e-07	0.656025	15.0681
4930546K05Rik	0.628741	1.42119	0.900216	0	2.85311	1.83419	0	0.436817	0.809501	NA	0.983382	1.17183
4930547E08Rik	2.20059	0.355297	0.300072	0	0	0	0	-0.449806	0.86144	NA	0.951988	0
4930547E14Rik	0.943112	0.710594	1.80043	0	0	0	0	-1.24907	0.585694	NA	1.15138	0
4930548H24Rik	1.57185	2.13178	2.1005	0	0	5.50257	0	-0.406535	0.796568	0.833366	1.93471	1.37564
4930549C15Rik	27.3502	24.8708	42.9103	0	5.70622	5.50257	0	-3.28322	1.68618e-05	4.03354e-05	31.7104	2.8022
4930549G23Rik	5.97304	9.59302	6.30151	3.04094	8.55933	5.50257	3.70979	-0.43392	0.557963	0.620506	7.28919	5.20316
4930550C14Rik	9.43112	13.146	14.4035	3.04094	0	3.66838	3.70979	-2.22921	0.0133397	0.0219541	12.3269	2.60478
4930552P12Rik	0.943112	0	1.20029	3.04094	5.70622	1.83419	11.1294	2.7557	0.00998181	0.0167848	0.714466	5.42768
4930556M19Rik	16.976	16.699	13.5032	51.696	62.7684	67.8651	33.3881	1.80799	5.29152e-10	1.86696e-09	15.7261	53.9294
4930556N13Rik	10.0599	10.6589	14.4035	0	39.9435	33.0154	18.5489	1.0029	0.0886676	0.124077	11.7074	22.877
4930557K07Rik	7.23052	8.88242	10.8026	6.08188	14.2656	12.8393	7.41958	0.240734	0.667126	0.720274	8.97185	10.1516
4930558J18Rik	1.88622	0.355297	0.300072	0	0	1.83419	3.70979	1.05368	0.472771	0.538714	0.847197	1.386
4930558K02Rik	1.57185	1.77648	1.50036	0	0	1.83419	0	-0.983255	0.634702	NA	1.61623	0.458548
4930562C15Rik	11.6317	8.52713	13.2032	12.1638	11.4124	23.8445	29.6783	0.78229	0.0892548	0.124806	11.1207	19.2748
4930562F07Rik	3.77245	6.39535	8.10194	3.04094	0	1.83419	3.70979	-1.5012	0.155923	0.205841	6.08991	2.14623
4930563D23Rik	0.943112	1.06589	1.20029	0	0	0	0	-1.11725	0.559537	NA	1.06976	0
4930563E18Rik	0.628741	2.84238	0.900216	3.04094	2.85311	0	3.70979	0.711442	0.572467	0.634005	1.45711	2.40096
4930563E22Rik	7.54489	8.52713	12.603	3.04094	8.55933	3.66838	3.70979	-1.001	0.164627	0.215964	9.55835	4.74461
4930563F08Rik	13.8323	15.9884	22.2053	6.08188	31.3842	38.518	11.1294	0.418387	0.386994	0.453962	17.342	21.7784
4930563M21Rik	2.20059	0.355297	3.00072	0	0	1.83419	0	-1.12365	0.45925	0.525221	1.8522	0.458548
4930564C03Rik	2.82934	2.13178	2.70065	0	2.85311	1.83419	0	-0.957432	0.479694	0.545425	2.55392	1.17183
4930565N06Rik	80.1645	103.747	127.531	27.3685	108.418	99.0463	74.1958	-0.387085	0.183055	0.237136	103.814	77.2572
4930570G19Rik	13.8323	18.8307	15.9038	0	0	0	0	-4.96803	1.99504e-05	4.74282e-05	16.189	0
4930577N17Rik	21.0628	20.6072	26.1063	3.04094	8.55933	14.6735	3.70979	-1.48332	0.00623468	0.01083	22.5921	7.4959
4930578C19Rik	104.371	115.827	138.033	21.2866	28.5311	33.0154	11.1294	-2.24559	3.11165e-12	1.27718e-11	119.41	23.4906
4930578M01Rik	21.6916	28.4238	22.5054	0	0	1.83419	0	-4.84867	1.49964e-05	3.61137e-05	24.2069	0.458548
4930579G18Rik	27.3502	45.8333	55.5133	27.3685	62.7684	47.689	25.9685	0.0580927	0.84135	0.871788	42.8989	40.9486
4930579G24Rik	53.7574	39.438	46.8112	15.2047	22.8249	1.83419	7.41958	-2.12736	1.63292e-05	3.91447e-05	46.6688	11.8208
4930579H20Rik	13.8323	11.7248	14.1034	3.04094	2.85311	3.66838	0	-2.31588	0.00655471	0.0113405	13.2202	2.39061
4930579J19Rik	5.3443	10.6589	8.70208	0	0	1.83419	0	-3.212	0.0176616	0.0284331	8.2351	0.458548
4930579K19Rik	3.77245	2.84238	3.30079	9.12282	0	3.66838	7.41958	0.541102	0.506192	0.57075	3.3052	5.0527
4930581F22Rik	39.6107	35.5297	47.1113	36.4913	88.4464	64.1967	81.6154	0.72708	0.0121077	0.0200541	40.7506	67.6874
4930583K01Rik	0.943112	1.77648	1.80043	3.04094	8.55933	0	0	1.02017	0.437167	0.503513	1.50668	2.90007
4930583P06Rik	1.88622	1.06589	1.50036	0	0	0	0	-1.60385	0.383336	NA	1.48416	0
4930590J08Rik	3.14371	5.68475	3.30079	0	2.85311	12.8393	0	0.162182	0.883825	0.907195	4.04308	3.92311
4930592A05Rik	1.57185	0.355297	1.50036	0	0	0	0	-1.31346	0.664305	NA	1.1425	0
4930592I03Rik	16.0329	20.2519	30.9074	3.04094	11.4124	16.5077	25.9685	-0.62416	0.161464	0.212442	22.3974	14.2324
4930593A02Rik	2.82934	2.84238	2.40058	3.04094	0	1.83419	0	-1.01131	0.45804	0.524015	2.69076	1.21878
4930594C11Rik	28.9221	40.5039	49.5119	12.1638	22.8249	33.0154	44.5175	-0.459392	0.165932	0.217459	39.6459	28.1304
4930595D18Rik	7.54489	8.52713	9.6023	0	0	11.0051	0	-1.32317	0.13558	0.181944	8.55811	2.75129
4930596I21Rik	8.48801	11.0142	16.804	6.08188	11.4124	33.0154	22.2587	0.681083	0.157718	0.208015	12.1021	18.1921
4930597A21Rik	1.57185	1.06589	3.30079	0	0	1.83419	0	-1.17796	0.632752	NA	1.97951	0.458548
4930599N23Rik	6.91615	6.75064	12.9031	6.08188	2.85311	5.50257	3.70979	-0.88797	0.243665	0.305186	8.85663	4.53684
4931402G19Rik	5.3443	7.10594	6.30151	0	5.70622	3.66838	7.41958	-0.645258	0.46321	0.529177	6.25058	4.19855
4931403E22Rik	5.97304	6.04005	4.80115	9.12282	11.4124	3.66838	7.41958	0.428684	0.538353	0.602108	5.60475	7.90581
4931403G20Rik	31.4371	39.438	37.509	12.1638	17.1187	27.5129	14.8392	-0.940206	0.0209854	0.0333358	36.128	17.9086
4931406C07Rik	1151.54	1997.83	1243.5	903.159	467.91	478.724	597.276	-1.2524	1.36476e-07	4.00163e-07	1464.29	611.767
4931406H21Rik	138.952	157.752	128.731	45.6141	97.0057	99.0463	77.9056	-0.836147	0.00420366	0.00749398	141.811	79.8929
4931406P16Rik	839.369	922.351	891.514	939.65	1415.14	1419.66	945.996	0.420184	0.0082658	0.0140887	884.411	1180.11
4931408D14Rik	171.018	174.451	145.235	3.04094	0	3.66838	7.41958	-5.6118	7.74758e-16	3.91459e-15	163.568	3.53223
4931414P19Rik	36.467	21.3178	27.9067	63.8597	42.7967	69.6993	59.3566	1.06122	0.000130027	0.000281348	28.5638	58.9281
4931423N10Rik	0.628741	0.355297	1.80043	0	0	0	3.70979	-0.125662	0.93734	0.951254	0.928156	0.927447
4931428F04Rik	27.6646	11.0142	12.9031	6.08188	19.9718	12.8393	7.41958	-0.463336	0.301681	0.366251	17.194	11.5781
4931430N09Rik	15.4042	19.186	28.5068	0	5.70622	5.50257	11.1294	-1.93405	0.00191017	0.00357675	21.0323	5.58454
4931431C16Rik	9.43112	6.75064	8.40201	9.12282	0	3.66838	18.5489	-0.214362	0.775275	0.815098	8.19459	7.83504
4931440F15Rik	3.45808	0.710594	3.60086	3.04094	2.85311	5.50257	0	0.250546	0.838063	0.868779	2.58984	2.84916
4931440J10Rik	0.628741	0	1.80043	0	0	3.66838	0	0.587518	0.8006	NA	0.809724	0.917096
4931440P22Rik	1.25748	0.710594	0.600144	0	0	0	3.70979	0.0638854	0.969566	NA	0.856073	0.927447
4932411E22Rik	2.20059	4.61886	3.60086	0	0	1.83419	3.70979	-1.30366	0.423669	0.489972	3.47344	1.386
4932416H05Rik	26.7215	30.9108	48.3116	39.5322	42.7967	49.5232	33.3881	0.295917	0.368682	0.435263	35.3146	41.31
4932418E24Rik	6.91615	0.710594	1.80043	21.2866	25.678	64.1967	25.9685	3.82956	2.13997e-12	8.87853e-12	3.14239	34.2824
4932435O22Rik	6.60178	9.94832	10.8026	0	0	7.33676	0	-2.03682	0.153269	0.202782	9.11756	1.83419
4932438A13Rik	2663.98	3571.45	3869.73	1824.56	2807.46	2696.26	2389.1	-0.438009	0.00214168	0.00398242	3368.38	2429.35
4932438H23Rik	7.54489	7.81653	9.6023	0	0	3.66838	0	-2.68114	0.0172481	0.0278363	8.32124	0.917096
4932441J04Rik	4.08682	3.19767	1.80043	0	0	1.83419	3.70979	-1.11225	0.375004	0.4418	3.02831	1.386
4933400A11Rik	11.9461	16.699	16.804	0	2.85311	5.50257	0	-2.53623	0.00473202	0.00837665	15.1497	2.08892
4933400F21Rik	38.0388	43.3462	59.7143	39.5322	57.0622	62.3625	59.3566	0.256628	0.310977	0.376022	47.0331	54.5784
4933401H06Rik	2.51496	0.710594	2.70065	72.9825	342.373	253.118	103.874	6.57062	5.08558e-28	4.59471e-27	1.9754	193.087
4933402D24Rik	3.14371	3.90827	4.20101	0	0	5.50257	3.70979	-0.664058	0.573693	0.635155	3.75099	2.30309
4933404O12Rik	22.0059	19.186	21.6052	30.4094	19.9718	9.17096	25.9685	-0.0637097	0.882119	0.905939	20.9324	21.3802
4933405D12Rik	2.20059	3.90827	1.20029	3.04094	0	0	0	-1.52374	0.339641	0.405973	2.43638	0.760235
4933405L10Rik	1.88622	0	0.300072	0	0	3.66838	0	1.65544	0.53277	NA	0.728765	0.917096
4933406C10Rik	5.65867	8.52713	9.30223	6.08188	11.4124	7.33676	7.41958	0.0886059	0.879975	0.904508	7.82934	8.06267
4933406I18Rik	33.952	38.3721	40.8098	3.04094	0	5.50257	7.41958	-3.24633	1.18936e-05	2.89471e-05	37.7113	3.99077
4933406J10Rik	4.71556	5.32945	8.70208	6.08188	8.55933	11.0051	3.70979	0.355732	0.571085	0.632682	6.24903	7.33904
4933406M09Rik	1.25748	2.84238	1.80043	0	2.85311	5.50257	0	0.007695	0.995439	0.997211	1.96676	2.08892
4933407K13Rik	35.2095	39.0827	60.3144	24.3275	8.55933	16.5077	18.5489	-1.37519	0.000643811	0.00128065	44.8689	16.9859
4933408B17Rik	5.65867	6.39535	10.5025	6.08188	8.55933	9.17096	7.41958	0.130543	0.826483	0.858892	7.51884	7.80794
4933408J17Rik	0	0	1.50036	0	0	0	0	0.7647	0.788638	NA	0.50012	0
4933408N05Rik	0.314371	1.42119	1.20029	0	0	0	0	-0.627002	0.799117	NA	0.978615	0
4933411K16Rik	5.3443	4.61886	5.10122	158.129	74.1809	128.393	100.164	4.52626	2.71452e-23	2.00426e-22	5.02146	115.217
4933412E12Rik	14.461	20.6072	18.3044	42.5732	48.5029	80.7044	74.1958	1.83744	1.94399e-09	6.59822e-09	17.7909	61.4941
4933413J09Rik	2.51496	5.32945	7.20173	24.3275	22.8249	29.3471	40.8077	2.69918	1.25585e-10	4.64438e-10	5.01538	29.3268
4933416M07Rik	1.57185	2.84238	2.40058	3.04094	11.4124	7.33676	0	1.38216	0.113633	0.155155	2.2716	5.44754
4933417A18Rik	0.628741	1.06589	3.30079	0	0	0	3.70979	-0.588619	0.769505	NA	1.66514	0.927447
4933417D19Rik	5.3443	3.90827	5.40129	9.12282	14.2656	7.33676	3.70979	0.833457	0.22131	0.280285	4.88462	8.60873
4933417E11Rik	1.25748	0.710594	0.900216	0	0	0	0	-0.957107	0.691865	NA	0.956097	0
4933417G07Rik	4.71556	2.84238	3.60086	9.12282	8.55933	22.0103	11.1294	1.81225	0.00370313	0.00665933	3.7196	12.7055
4933417O13Rik	6.60178	3.90827	5.10122	0	0	7.33676	0	-1.12873	0.328582	0.394121	5.20376	1.83419
4933421O10Rik	97.4549	144.961	136.233	60.8188	162.627	73.3676	103.874	-0.310839	0.29538	0.359713	126.216	100.172
4933422A05Rik	0.314371	0.710594	2.40058	0	2.85311	3.66838	0	1.19963	0.389217	0.456063	1.14185	1.63037
4933424G05Rik	16.6616	9.59302	14.7035	3.04094	8.55933	7.33676	3.70979	-1.21574	0.0523447	0.0771488	13.6527	5.66171
4933424G06Rik	0.943112	3.19767	0.600144	3.04094	0	0	0	-0.810569	0.696022	NA	1.58031	0.760235
4933427D14Rik	171.018	129.328	162.939	188.538	191.158	198.093	185.489	0.305962	0.0565545	0.0827611	154.428	190.82
4933427E11Rik	0.943112	0.355297	1.80043	0	0	1.83419	0	-0.411968	0.810631	NA	1.03295	0.458548
4933427G17Rik	11.6317	14.9225	7.20173	0	0	1.83419	0	-3.74111	0.00202518	0.00378036	11.252	0.458548
4933427I22Rik	0.314371	2.13178	0.900216	0	0	0	3.70979	-0.0826732	0.956475	0.965855	1.11546	0.927447
4933428G20Rik	5.97304	14.2119	11.4027	0	0	3.66838	0	-2.91811	0.0123729	0.0204551	10.5292	0.917096
4933430I17Rik	2.51496	5.68475	4.50108	3.04094	0	0	3.70979	-1.58825	0.183003	0.237086	4.2336	1.68768
4933431E20Rik	56.2723	71.0594	66.916	164.211	151.215	170.58	200.329	1.41687	7.08614e-15	3.4032e-14	64.7493	171.583
4933431G14Rik	6.91615	7.10594	11.1027	0	0	0	0	-4.00312	0.000664583	0.00131979	8.37492	0
4933433G15Rik	8.80238	9.94832	13.2032	9.12282	5.70622	7.33676	18.5489	-0.123809	0.826165	0.858658	10.6513	10.1787
4933433G19Rik	24.2065	32.332	32.7078	9.12282	5.70622	12.8393	14.8392	-1.46794	0.00127933	0.00245486	29.7488	10.6269
4933433H22Rik	4.08682	7.81653	1.80043	0	0	3.66838	3.70979	-1.36476	0.28441	0.348187	4.56793	1.84454
4933434E20Rik	408.682	542.183	487.317	936.609	893.023	827.22	879.22	0.89585	9.37521e-22	6.47219e-21	479.394	884.018
4933439C10Rik	32.6945	29.8449	32.7078	36.4913	39.9435	47.689	44.5175	0.410873	0.142632	0.190123	31.7491	42.1603
4933439K11Rik	3.14371	4.97416	2.70065	15.2047	17.1187	18.3419	22.2587	2.36065	1.58747e-05	3.80821e-05	3.60617	18.231
4933440M02Rik	0	0	1.20029	3.04094	5.70622	1.83419	3.70979	3.8006	0.00345009	0.00623496	0.400096	3.57279
5031414D18Rik	30.1796	20.9625	33.6081	12.1638	8.55933	14.6735	11.1294	-1.26266	0.00775416	0.0132809	28.25	11.6315
5031425E22Rik	228.862	212.468	306.373	170.293	216.836	212.766	185.489	-0.325261	0.058165	0.084897	249.234	196.346
5031425F14Rik	6.91615	11.7248	7.5018	3.04094	0	5.50257	0	-1.86167	0.0575389	0.0840995	8.71425	2.13588
5031426D15Rik	151.212	236.628	321.977	42.5732	97.0057	137.564	48.2273	-1.42738	2.73872e-05	6.40704e-05	236.606	81.3426
5031434C07Rik	20.1197	30.2002	31.8076	6.08188	8.55933	9.17096	7.41958	-1.73569	0.0010343	0.0020099	27.3759	7.80794
5031434O11Rik	5.02993	8.17183	8.40201	0	11.4124	9.17096	3.70979	-0.19724	0.807436	0.842563	7.20126	6.0733
5031439G07Rik	607.993	451.938	435.404	2244.21	2393.76	2100.15	1955.06	2.12376	4.49793e-36	5.49183e-35	498.445	2173.3
5033403F01Rik	4.71556	3.90827	2.40058	0	0	3.66838	7.41958	-0.507895	0.626807	0.68418	3.6748	2.77199
5033403H07Rik	0	0	0	48.655	25.678	34.8496	14.8392	9.03489	5.87229e-12	2.37167e-11	0	31.0055
5033406O09Rik	10.6886	6.04005	7.5018	45.6141	42.7967	42.1864	37.0979	2.38599	7.14357e-13	3.0546e-12	8.07681	41.9238
5330417C22Rik	19.491	5.68475	11.1027	3.04094	2.85311	1.83419	0	-2.553	0.00550173	0.00965419	12.0928	1.93206
5330426P16Rik	114.431	151.712	162.339	24.3275	17.1187	31.1812	44.5175	-2.27587	2.93611e-14	1.36244e-13	142.827	29.2862
5330434G04Rik	0	2.48708	1.20029	0	0	0	0	-0.152709	0.95792	NA	1.22912	0
5330439B14Rik	1.57185	2.48708	3.60086	0	0	0	0	-2.1731	0.230281	0.290296	2.55326	0
5430402O13Rik	10.3742	13.5013	5.70137	3.04094	0	1.83419	11.1294	-1.48022	0.100492	0.139	9.85896	4.00113
5430403N17Rik	0	0.355297	2.1005	0	0	1.83419	0	1.19832	0.548806	NA	0.8186	0.458548
5430405H02Rik	12.8892	11.3695	12.0029	15.2047	28.5311	20.1761	14.8392	0.714514	0.0850396	0.119545	12.0872	19.6878
5430416N02Rik	19.1766	9.23772	20.705	33.4503	14.2656	22.0103	44.5175	0.764912	0.0864128	0.121244	16.3731	28.5609
5430416O09Rik	137.38	171.608	167.44	63.8597	88.4464	135.73	92.7447	-0.699772	0.00101507	0.00197448	158.809	95.1953
5430419D17Rik	2.51496	47.2545	66.3159	6.08188	0	0	0	-3.72476	0.000673478	0.00133651	38.6951	1.52047
5430421F17Rik	3.14371	3.19767	3.00072	0	0	1.83419	0	-1.90127	0.20783	0.265323	3.11403	0.458548
5430425K12Rik	7.85926	3.55297	4.20101	0	0	1.83419	0	-2.58322	0.0871243	0.122151	5.20441	0.458548
5430427M07Rik	2.20059	3.90827	3.60086	3.04094	5.70622	1.83419	0	-0.233997	0.82965	0.861379	3.23657	2.64534
5430427O19Rik	24.2065	28.4238	43.8105	6.08188	5.70622	3.66838	0	-2.94824	3.26956e-05	7.59315e-05	32.1469	3.86412
5430428K19Rik	5.02993	3.55297	5.40129	0	8.55933	1.83419	0	-0.815715	0.433717	0.499983	4.6614	2.59838
5430431A17Rik	2.82934	1.42119	1.80043	6.08188	0	7.33676	3.70979	1.16256	0.150122	0.198992	2.01698	4.28211
5430437J10Rik	3.14371	7.10594	3.60086	0	2.85311	9.17096	3.70979	-0.111027	0.905396	0.924951	4.61684	3.93346
5530601H04Rik	93.0537	98.062	104.425	45.6141	57.0622	91.7096	55.6468	-0.607347	0.0144308	0.0236146	98.5136	62.5082
5730405O15Rik	20.4341	15.2778	18.0043	6.08188	8.55933	5.50257	3.70979	-1.59909	0.00970097	0.0163451	17.9054	5.96339
5730408K05Rik	6.60178	1.77648	6.00144	27.3685	11.4124	31.1812	48.2273	2.61018	4.12125e-07	1.15793e-06	4.79323	29.5474
5730409E04Rik	172.904	233.075	173.141	404.445	390.876	346.662	333.881	0.944461	7.81686e-10	2.73056e-09	193.04	368.966
5730420D15Rik	0.314371	0.355297	1.20029	0	22.8249	20.1761	14.8392	4.67765	1.19882e-06	3.22602e-06	0.623318	14.46
5730422E09Rik	5.02993	3.55297	3.00072	0	5.70622	1.83419	0	-0.926846	0.412488	0.479471	3.86121	1.8851
5730435O14Rik	1.57185	0	0.600144	0	0	0	0	-0.190915	0.925753	NA	0.723999	0
5730455P16Rik	460.867	616.796	597.143	298.012	239.661	234.776	255.975	-1.10667	7.64949e-16	3.86618e-15	558.269	257.106
5730480H06Rik	22.0059	31.6214	37.2089	6.08188	28.5311	16.5077	14.8392	-0.822347	0.0554612	0.0813091	30.2788	16.49
5730507C01Rik	11.3173	25.2261	21.9052	0	0	3.66838	0	-3.76058	0.000608369	0.00121472	19.4829	0.917096
5730508B09Rik	329.46	414.987	311.475	57.7779	85.5933	56.8599	55.6468	-2.46047	1.23419e-25	1.00972e-24	351.974	63.9695
5730522E02Rik	1.57185	0.355297	2.40058	0	0	0	0	-1.5457	0.36562	NA	1.44257	0
5730559C18Rik	14.7754	1.77648	3.30079	72.9825	51.356	44.0206	66.7762	3.45791	3.22497e-21	2.17479e-20	6.61756	58.7838
5830411N06Rik	0.628741	1.77648	0	0	0	5.50257	0	0.852787	0.718643	NA	0.801742	1.37564
5830415F09Rik	45.2694	31.9767	33.9081	85.1463	111.271	88.0412	85.3252	1.3191	6.06418e-10	2.13377e-09	37.0514	92.446
5830416P10Rik	3.14371	3.19767	2.1005	3.04094	11.4124	9.17096	0	1.11541	0.177287	0.230779	2.81396	5.90608
5830417I10Rik	153.413	157.752	162.339	97.3101	122.684	143.067	126.133	-0.35204	0.0426007	0.0639143	157.835	122.298
5830418P13Rik	0.628741	0.710594	0.900216	6.08188	0	1.83419	0	1.3704	0.425434	NA	0.746517	1.97902
5830428M24Rik	0.943112	6.04005	2.70065	9.12282	2.85311	12.8393	14.8392	1.89853	0.00655988	0.0113482	3.22794	9.91361
5830432E09Rik	18.8622	22.3837	31.8076	6.08188	8.55933	14.6735	14.8392	-1.0822	0.0239558	0.0377067	24.3512	11.0385
5830444B04Rik	10.6886	3.90827	14.1034	6.08188	11.4124	3.66838	3.70979	-0.65721	0.379828	0.446704	9.56675	6.21812
5830454E08Rik	4.08682	3.90827	2.1005	6.08188	8.55933	11.0051	3.70979	1.18807	0.094257	0.131203	3.3652	7.33904
5930403L14Rik	69.7903	61.4664	45.6109	0	5.70622	1.83419	7.41958	-4.10674	4.45295e-08	1.36218e-07	58.9559	3.74
5930412G12Rik	19.1766	15.6331	15.3037	3.04094	2.85311	0	0	-3.61048	0.000594129	0.00118713	16.7044	1.47351
5930430L01Rik	109.715	104.102	83.42	36.4913	57.0622	91.7096	55.6468	-0.712467	0.00663987	0.0114807	99.0791	60.2275
6030407O03Rik	1.88622	2.84238	2.70065	0	2.85311	1.83419	0	-0.857075	0.5438	0.607316	2.47642	1.17183
6030408B16Rik	0	0.355297	0.600144	0	0	0	3.70979	1.89794	0.285227	0.349075	0.31848	0.927447
6030419C18Rik	29.5508	13.146	8.40201	9.12282	8.55933	9.17096	11.1294	-0.748834	0.140738	0.188014	17.0329	9.49562
6030443J06Rik	34.5808	38.7274	32.7078	30.4094	37.0904	34.8496	25.9685	-0.11908	0.703133	0.751414	35.3387	32.0795
6030458C11Rik	238.607	286.014	312.075	325.381	313.842	304.476	230.007	0.102176	0.452306	0.518333	278.899	293.426
6030466F02Rik	0	0.355297	0	12.1638	17.1187	5.50257	7.41958	6.63054	4.06868e-06	1.03845e-05	0.118432	10.5511
6030468B19Rik	0.628741	0	0.600144	0	0	0	0	0.344383	0.853951	NA	0.409628	0
6030469F06Rik	1.25748	0.355297	2.70065	0	0	1.83419	0	-0.689926	0.727736	NA	1.43781	0.458548
6230400D17Rik	8.48801	11.7248	10.5025	9.12282	8.55933	9.17096	7.41958	-0.22989	0.690463	0.740593	10.2384	8.56817
6330403A02Rik	16.976	20.2519	20.1048	3.04094	5.70622	11.0051	3.70979	-1.65877	0.00553008	0.0096999	19.1109	5.86552
6330403K07Rik	3.45808	2.84238	3.00072	21.2866	5.70622	9.17096	7.41958	1.78742	0.00240482	0.00444141	3.10039	10.8958
6330407A03Rik	29.8652	51.1628	53.1127	6.08188	19.9718	33.0154	7.41958	-1.24127	0.00423248	0.00754059	44.7136	16.6222
6330408A02Rik	23.2634	26.6473	31.5075	33.4503	28.5311	40.3522	33.3881	0.359132	0.25232	0.314371	27.1394	33.9304
6330409D20Rik	16.6616	30.9108	28.8069	3.04094	14.2656	23.8445	3.70979	-1.03904	0.0550774	0.0807884	25.4598	11.2152
6330410L21Rik	0	0	0.300072	24.3275	22.8249	40.3522	29.6783	8.06243	5.48742e-11	2.07899e-10	0.100024	29.2957
6330415G19Rik	10.3742	4.97416	6.60158	0	5.70622	12.8393	14.8392	0.202855	0.778167	0.817477	7.31666	8.34618
6330416G13Rik	153.727	179.78	96.9232	121.638	156.921	135.73	103.874	-0.13759	0.587663	0.648537	143.477	129.541
6330418K02Rik	4.71556	4.61886	9.90237	0	0	0	0	-3.60906	0.00618575	0.0107517	6.41226	0
6330549D23Rik	22.9491	31.2661	41.1098	6.08188	11.4124	27.5129	18.5489	-0.909068	0.0387174	0.0585617	31.775	15.889
6430531B16Rik	4.71556	2.13178	2.70065	0	0	0	0	-2.58477	0.0468398	0.0697536	3.18266	0
6430548M08Rik	145.868	105.879	105.625	1015.67	807.43	687.822	719.699	2.74818	6.22068e-81	2.47159e-79	119.124	807.656
6430550D23Rik	21.6916	18.1201	27.6066	3.04094	14.2656	20.1761	14.8392	-0.717953	0.138742	0.185568	22.4728	13.0804
6430562O15Rik	15.0898	10.6589	8.10194	12.1638	11.4124	20.1761	7.41958	0.245176	0.627774	0.685102	11.2835	12.793
6430571L13Rik	4.71556	2.13178	3.30079	0	8.55933	3.66838	0	-0.0606263	0.946166	0.958081	3.38271	3.05693
6430573F11Rik	34.8951	32.332	28.8069	54.7369	59.9153	27.5129	29.6783	0.379097	0.201161	0.257861	32.0114	42.9609
6430584L05Rik	2.20059	2.48708	1.80043	0	0	3.66838	0	-0.842339	0.574737	0.636228	2.1627	0.917096
6430710C18Rik	0.628741	0.355297	0.600144	15.2047	2.85311	18.3419	18.5489	4.69644	3.08866e-06	7.98945e-06	0.528061	13.7372
6530402F18Rik	198.997	236.628	165.34	33.4503	28.5311	20.1761	29.6783	-2.87936	5.33999e-18	3.04219e-17	200.321	27.959
6720468P15Rik	0	1.06589	1.20029	0	0	0	0	0.441873	0.876984	NA	0.755393	0
6720489N17Rik	62.8741	98.7726	111.627	6.08188	8.55933	3.66838	3.70979	-4.02328	1.40026e-12	5.87885e-12	91.0911	5.50485
6820408C15Rik	1.88622	3.19767	1.20029	12.1638	2.85311	5.50257	14.8392	2.00298	0.0067554	0.0116721	2.09473	8.83965
6820431F20Rik	22.9491	34.8191	35.7086	18.2456	31.3842	33.0154	63.0664	0.224501	0.478849	0.544685	31.1589	36.4279
7420701I03Rik	0.628741	1.06589	1.80043	0	0	0	0	-1.01936	0.734187	NA	1.16502	0
8030462N17Rik	298.023	346.059	377.79	322.34	350.933	273.294	319.042	-0.102446	0.414936	0.481786	340.624	316.402
8430408G22Rik	142.41	171.964	114.327	489.591	165.48	253.118	244.846	1.01187	0.00222214	0.00412387	142.9	288.259
8430419L09Rik	143.667	130.039	113.727	1581.29	1683.33	1491.2	1643.44	3.62133	4.79054e-214	1.32612e-211	129.144	1599.81
8430423G03Rik	1.25748	0.710594	0	6.08188	0	1.83419	0	1.8645	0.335567	0.4017	0.656025	1.97902
8430426J06Rik	20.7485	4.26356	11.1027	298.012	242.514	304.476	267.105	4.60572	3.73969e-17	2.03902e-16	12.0382	278.027
8430429K09Rik	32.0658	24.5155	30.0072	30.4094	22.8249	29.3471	29.6783	-0.0469579	0.892882	0.914546	28.8628	28.0649
8430431K14Rik	27.6646	34.4638	43.2104	0	19.9718	14.6735	11.1294	-1.54196	0.00325086	0.00590131	35.1129	11.4437
8430436N08Rik	0.943112	1.77648	1.20029	6.08188	0	1.83419	0	0.580317	0.699243	0.7483	1.30663	1.97902
9030025P20Rik	19.491	27.3579	30.3073	9.12282	14.2656	16.5077	18.5489	-0.791688	0.0664899	0.0957487	25.7187	14.6113
9030404E10Rik	0.943112	0.710594	0.300072	0	2.85311	3.66838	0	1.42853	0.340449	0.406794	0.651259	1.63037
9030612E09Rik	1.25748	0.710594	1.20029	0	0	1.83419	0	-0.33759	0.829104	NA	1.05612	0.458548
9030617O03Rik	302.424	323.32	229.555	304.094	219.689	251.284	252.266	-0.151733	0.475587	0.541448	285.1	256.833
9030619P08Rik	7.85926	31.2661	18.0043	0	0	0	0	-5.02564	0.000104986	0.000229606	19.0432	0
9030624G23Rik	11.9461	12.4354	15.9038	3.04094	2.85311	1.83419	3.70979	-2.31828	0.00877789	0.0149058	13.4284	2.85951
9030624J02Rik	589.759	451.227	419.801	538.246	499.294	498.9	393.238	-0.0040812	0.97186	0.977766	486.929	482.42
9130008F23Rik	45.5837	54.3604	61.8148	45.6141	48.5029	49.5232	55.6468	-0.105525	0.689977	0.740166	53.9197	49.8217
9130011E15Rik	185.793	245.51	219.052	170.293	136.949	166.911	129.843	-0.493378	0.00431889	0.00768804	216.785	150.999
9130019O22Rik	39.2963	35.1744	33.6081	45.6141	48.5029	22.0103	29.6783	-0.0135082	0.967911	0.974781	36.0263	36.4514
9130019P16Rik	9.43112	7.46124	8.10194	0	0	11.0051	3.70979	-0.979399	0.224082	0.283243	8.33143	3.67873
9130023H24Rik	83.3082	101.97	111.027	106.433	85.5933	82.5386	66.7762	-0.188078	0.382533	0.44954	98.7683	85.3353
9130221H12Rik	38.3532	40.1486	39.6095	42.5732	39.9435	34.8496	44.5175	0.0179531	0.948629	0.959769	39.3704	40.471
9130230L23Rik	2.51496	3.19767	2.1005	57.7779	71.3278	49.5232	59.3566	4.52224	3.84487e-26	3.20773e-25	2.60438	59.4963
9130401M01Rik	173.218	133.236	120.929	167.252	111.271	121.057	129.843	-0.112139	0.576316	0.637787	142.461	132.356
9230102O04Rik	7.54489	4.26356	5.10122	18.2456	5.70622	29.3471	14.8392	1.66079	0.00138258	0.00263918	5.63656	17.0345
9230104L09Rik	7.54489	9.23772	14.4035	0	0	1.83419	0	-3.58246	0.00873396	0.0148402	10.3954	0.458548
9230110C19Rik	43.0688	55.4263	66.616	9.12282	0	11.0051	11.1294	-2.76558	2.69235e-08	8.37103e-08	55.037	7.81433
9230112D13Rik	0	0.355297	0.300072	3.04094	0	1.83419	0	2.88019	0.0995779	0.137859	0.218456	1.21878
9230112J17Rik	1.88622	1.77648	2.70065	0	2.85311	0	0	-1.30996	0.403392	0.470323	2.12112	0.713278
9230114K14Rik	86.1375	122.222	111.927	42.5732	31.3842	27.5129	22.2587	-1.75676	6.14105e-10	2.15947e-09	106.762	30.9322
9230116L04Rik	0.314371	2.48708	1.80043	15.2047	19.9718	20.1761	7.41958	4.02834	2.76296e-07	7.87831e-07	1.53396	15.693
9230116N13Rik	11.3173	12.4354	11.4027	3.04094	0	7.33676	7.41958	-1.35611	0.0799743	0.113122	11.7185	4.44932
9330020H09Rik	15.0898	15.6331	12.603	57.7779	77.034	66.0309	44.5175	2.1025	7.19458e-14	3.26668e-13	14.442	61.34
9330102E08Rik	79.5358	121.867	64.2154	6.08188	2.85311	20.1761	7.41958	-3.16173	1.3695e-08	4.35835e-08	88.5393	9.13267
9330111N05Rik	5.02993	5.68475	6.90165	0	0	0	0	-3.49472	0.0292126	0.0452222	5.87211	0
9330133O14Rik	21.6916	22.3837	27.3065	30.4094	59.9153	36.6838	40.8077	0.810661	0.011609	0.0192885	23.7939	41.9541
9330136K24Rik	25.1496	38.0168	36.0086	6.08188	5.70622	5.50257	3.70979	-2.60757	1.47599e-05	3.559e-05	33.0583	5.25012
9330151L19Rik	36.467	43.3462	68.4164	54.7369	71.3278	82.5386	48.2273	0.461455	0.0639992	0.0925327	49.4099	64.2076
9330159F19Rik	73.2483	201.453	141.034	24.3275	8.55933	11.0051	7.41958	-3.30312	1.07839e-10	4.01446e-10	138.579	12.8279
9330159M07Rik	33.952	48.6757	45.0108	6.08188	8.55933	9.17096	3.70979	-2.50778	1.64342e-06	4.3709e-06	42.5462	6.88049
9330162012Rik	25.7784	32.6873	20.1048	12.1638	22.8249	16.5077	7.41958	-0.808658	0.109046	0.149484	26.1902	14.729
9330162B11Rik	2.51496	2.13178	2.70065	0	2.85311	16.5077	11.1294	1.74802	0.0479089	0.0712076	2.44913	7.62255
9330175E14Rik	27.6646	22.0284	24.906	3.04094	0	11.0051	14.8392	-1.79756	0.00354039	0.00638776	24.8663	7.22131
9330175M20Rik	3.77245	6.75064	6.00144	3.04094	0	3.66838	0	-1.42884	0.188307	0.24297	5.50818	1.67733
9330179D12Rik	4.71556	6.04005	10.2024	0	2.85311	0	7.41958	-1.62647	0.13375	0.179673	6.98602	2.56817
9330182L06Rik	3.45808	5.32945	6.00144	3.04094	0	1.83419	0	-1.83066	0.138	0.184759	4.92966	1.21878
9330188P03Rik	8.80238	13.5013	17.4042	3.04094	22.8249	7.33676	0	-0.59056	0.410092	0.477179	13.2359	8.30065
9430015G10Rik	94.3112	65.7299	81.9196	63.8597	65.6215	71.5335	70.486	-0.252311	0.297047	0.361378	80.6536	67.8752
9430016H08Rik	132.036	169.121	164.739	164.211	114.124	119.222	133.552	-0.218173	0.21702	0.275472	155.299	132.777
9430018G01Rik	8.80238	12.0801	13.5032	6.08188	8.55933	9.17096	0	-0.764218	0.260521	0.323325	11.4619	5.95304
9430020K01Rik	1589.14	1584.98	1315.82	304.094	308.136	566.765	370.979	-1.94724	1.43014e-20	9.33852e-20	1496.65	387.493
9430037G07Rik	41.1825	48.3204	50.7121	0	2.85311	11.0051	14.8392	-2.65468	9.23444e-07	2.50897e-06	46.7384	7.17435
9430038I01Rik	38.3532	29.8449	35.7086	179.415	65.6215	84.3728	55.6468	1.44839	2.08625e-05	4.94919e-05	34.6356	96.2642
9430041J12Rik	0.943112	0	0	12.1638	17.1187	22.0103	11.1294	6.28632	1.12894e-07	3.33682e-07	0.314371	15.6055
9430060I03Rik	3.45808	4.61886	6.30151	3.04094	2.85311	3.66838	0	-0.825147	0.400954	0.467846	4.79282	2.39061
9430065F17Rik	7.54489	5.32945	8.10194	0	11.4124	3.66838	3.70979	-0.580015	0.460968	0.527008	6.9921	4.69765
9430069I07Rik	3.77245	6.39535	4.50108	0	0	0	0	-3.23649	0.0250099	0.0392197	4.88962	0
9430076C15Rik	40.8682	23.8049	41.71	0	2.85311	7.33676	11.1294	-2.7709	1.34982e-05	3.26923e-05	35.461	5.32981
9430078K24Rik	8.48801	2.84238	4.50108	0	2.85311	3.66838	3.70979	-1.05683	0.302523	0.367141	5.27715	2.55782
9430083A17Rik	8.48801	11.7248	11.4027	91.2282	62.7684	67.8651	59.3566	2.77437	2.72e-21	1.8372e-20	10.5385	70.3046
9430091E24Rik	90.2244	123.643	144.635	85.1463	119.831	106.383	70.486	-0.257288	0.21382	0.271921	119.501	95.4615
9530014B07Rik	45.5837	15.9884	37.8091	0	2.85311	0	0	-5.30949	2.7303e-05	6.39001e-05	33.1271	0.713278
9530026P05Rik	27.0359	41.2145	60.6145	51.696	31.3842	31.1812	22.2587	-0.215884	0.566952	0.628598	42.9549	34.13
9530027J09Rik	4.71556	4.26356	5.40129	6.08188	11.4124	5.50257	7.41958	0.64245	0.338694	0.404899	4.79347	7.60412
9530051G07Rik	4.40119	8.88242	7.5018	3.04094	0	1.83419	0	-2.26636	0.0634106	0.0917839	6.92847	1.21878
9530052E02Rik	2.51496	2.48708	0.900216	3.04094	8.55933	0	3.70979	0.883756	0.423531	0.489846	1.96742	3.82751
9530053A07Rik	1.57185	0	0.900216	9.12282	17.1187	5.50257	3.70979	3.5332	0.000342315	0.00070535	0.824023	8.86346
9530059O14Rik	4.40119	8.88242	8.40201	0	0	1.83419	0	-3.01247	0.0143619	0.0235087	7.22854	0.458548
9530062K07Rik	7.85926	9.59302	11.7028	6.08188	14.2656	5.50257	7.41958	-0.231291	0.711033	0.75837	9.71836	8.3174
9530068E07Rik	1696.66	2284.91	2078.3	1149.48	930.114	810.712	1164.87	-0.983206	4.67139e-11	1.78261e-10	2019.96	1013.79
9530077C05Rik	15.0898	13.8566	24.0058	12.1638	14.2656	33.0154	22.2587	0.264148	0.529359	0.593423	17.6507	20.4259
9530080O11Rik	0.314371	0	0.600144	3.04094	5.70622	7.33676	0	3.80289	0.00307647	0.00560765	0.304838	4.02098
9530082P21Rik	261.242	199.322	177.042	85.1463	148.362	166.911	174.36	-0.558656	0.00666544	0.0115238	212.535	143.695
9530091C08Rik	213.143	242.313	284.768	21.2866	42.7967	80.7044	48.2273	-2.30408	3.1462e-12	1.29074e-11	246.741	48.2537
9630013A20Rik	7.85926	14.2119	13.8033	6.08188	2.85311	11.0051	0	-0.99129	0.123552	0.167211	11.9582	4.98503
9630013K17Rik	3.45808	2.48708	3.30079	3.04094	2.85311	11.0051	7.41958	1.04586	0.177622	0.231162	3.08198	6.07969
9630028B13Rik	3.77245	4.61886	5.40129	0	2.85311	7.33676	3.70979	-0.298743	0.730354	0.775206	4.59753	3.47492
9630028I04Rik	6.91615	4.61886	5.70137	3.04094	0	1.83419	3.70979	-1.49643	0.184049	0.238314	5.74546	2.14623
9830132P13Rik	2.82934	2.13178	3.30079	0	0	0	0	-2.44557	0.412944	NA	2.75397	0
9830147E19Rik	143.982	187.952	229.555	97.3101	77.034	104.549	81.6154	-0.991573	1.89916e-07	5.50167e-07	187.163	90.1271
9830166K06Rik	1.25748	2.13178	1.20029	0	0	0	0	-1.56561	0.311091	0.376107	1.52985	0
9930012K11Rik	18.5479	8.17183	13.2032	0	5.70622	9.17096	0	-1.56378	0.0382087	0.0578647	13.3076	3.71929
9930014A18Rik	36.7814	33.0426	53.4128	24.3275	102.712	55.0257	66.7762	0.603609	0.109808	0.150444	41.0789	62.2104
9930021J03Rik	468.098	595.478	706.669	510.878	602.006	603.449	556.468	-0.0168156	0.872532	0.898115	590.082	568.2
9930104L06Rik	111.602	137.145	112.527	63.8597	82.7402	102.715	77.9056	-0.521988	0.0129371	0.0213398	120.424	81.8051
9930111J21Rik1	60.6735	46.5439	65.4157	18.2456	8.55933	29.3471	14.8392	-1.6362	0.000106815	0.000233304	57.5444	17.7478
9930111J21Rik2	4.08682	3.55297	8.10194	0	0	3.66838	0	-1.99724	0.130658	0.175828	5.24724	0.917096
A130010J15Rik	83.3082	80.2971	97.2233	288.889	273.899	300.807	348.72	1.79938	3.39364e-23	2.49044e-22	86.9429	303.079
A130077B15Rik	3.14371	3.19767	12.3029	0	0	0	3.70979	-2.59255	0.052759	0.0776848	6.21478	0.927447
A1bg	5.97304	8.88242	7.5018	0	5.70622	11.0051	3.70979	-0.469121	0.559825	0.622272	7.45242	5.10529
A230001M10Rik	0.943112	3.55297	4.80115	0	8.55933	3.66838	7.41958	0.976367	0.340149	0.406493	3.09908	4.91182
A230009B12Rik	2.51496	3.19767	2.40058	0	2.85311	0	0	-1.65245	0.269308	0.332495	2.7044	0.713278
A230020J21Rik	1.57185	2.13178	2.1005	0	0	0	3.70979	-1.176	0.39237	0.459152	1.93471	0.927447
A230028O05Rik	3.77245	6.04005	4.80115	6.08188	0	1.83419	0	-1.2536	0.256966	0.319477	4.87122	1.97902
A230046K03Rik	1092.12	1470.22	1649.5	1000.47	961.498	902.422	916.318	-0.534726	1.84773e-08	5.82864e-08	1403.95	945.177
A230050P20Rik	23.5778	13.146	19.2046	9.12282	42.7967	16.5077	18.5489	0.204217	0.61249	0.671025	18.6428	21.744
A230056J06Rik	0.628741	0.710594	1.80043	0	0	0	0	-0.883167	0.667352	NA	1.04659	0
A230056P14Rik	34.8951	48.3204	56.1134	18.2456	11.4124	9.17096	3.70979	-2.06841	1.00666e-05	2.4657e-05	46.443	10.6347
A230057D06Rik	11.3173	14.5672	16.804	0	0	0	0	-4.79185	0.000137543	0.000296471	14.2295	0
A230065H16Rik	1.25748	0.355297	0.300072	0	0	1.83419	0	0.673676	0.638331	0.694559	0.637617	0.458548
A230072C01Rik	51.2424	69.2829	63.6152	12.1638	34.2373	31.1812	7.41958	-1.41567	0.000137443	0.000296292	61.3802	21.2505
A230072E10Rik	2.51496	4.26356	7.20173	6.08188	19.9718	38.518	33.3881	2.56765	9.93542e-08	2.95005e-07	4.66008	24.4899
A230103J11Rik	7.85926	3.90827	6.00144	9.12282	22.8249	14.6735	11.1294	1.29442	0.0197178	0.0315	5.92299	14.4376
A230108P19Rik	0.628741	0.710594	1.20029	0	5.70622	3.66838	0	1.69418	0.216309	0.274631	0.846541	2.34365
A330009N23Rik	5.97304	5.32945	4.80115	6.08188	2.85311	5.50257	0	-0.478863	0.556284	0.619087	5.36788	3.60939
A330015K06Rik	3.45808	6.39535	5.40129	0	5.70622	1.83419	0	-1.29437	0.220595	0.279464	5.08491	1.8851
A330023F24Rik	144.61	217.797	245.159	39.5322	94.1526	141.233	92.7447	-1.08575	3.4549e-06	8.88238e-06	202.522	91.9156
A330032B11Rik	4.40119	11.3695	5.70137	6.08188	5.70622	7.33676	3.70979	-0.190952	0.794082	0.831506	7.15735	5.70866
A330033J07Rik	2.51496	0	0.600144	0	0	1.83419	0	0.212243	0.930005	NA	1.03837	0.458548
A330035P11Rik	26.0928	29.8449	31.8076	60.8188	39.9435	42.1864	81.6154	0.902283	0.00181196	0.00340229	29.2484	56.141
A330040F15Rik	6.91615	12.4354	14.7035	3.04094	0	0	0	-3.66405	0.00164268	0.00310585	11.3517	0.760235
A330041J22Rik	5.02993	3.90827	5.70137	39.5322	22.8249	25.6787	44.5175	2.70897	3.80449e-10	1.35476e-09	4.87985	33.1383
A330069E16Rik	7.85926	5.32945	9.90237	9.12282	2.85311	3.66838	14.8392	-0.154847	0.825422	0.858098	7.69703	7.62087
A330074K22Rik	5.02993	3.90827	4.20101	0	0	1.83419	0	-2.38971	0.0633736	0.0917382	4.37973	0.458548
A330076H08Rik	11.6317	17.4096	20.4049	0	0	0	0	-4.95616	2.12651e-05	5.04116e-05	16.4821	0
A330102I10Rik	4.08682	2.48708	1.80043	3.04094	2.85311	5.50257	0	0.218803	0.809666	0.844583	2.79144	2.84916
A3galt2	3.14371	2.13178	3.00072	0	2.85311	5.50257	0	-0.292479	0.796123	0.833127	2.75874	2.08892
A430005L14Rik	84.8801	58.9793	48.6116	234.152	176.893	154.072	230.007	1.62596	2.84939e-17	1.56522e-16	64.157	198.781
A430033K04Rik	98.7124	90.2454	143.434	130.76	125.537	161.409	126.133	0.323792	0.148377	0.197004	110.797	135.96
A430035B10Rik	45.5837	54.3604	52.5126	15.2047	14.2656	12.8393	18.5489	-1.76691	2.95874e-05	6.89691e-05	50.8189	15.2146
A430046D13Rik	105	104.457	91.5219	79.0644	34.2373	64.1967	55.6468	-0.777746	0.00319681	0.00581006	100.326	58.2863
A430078G23Rik	12.8892	8.88242	18.6045	6.08188	0	11.0051	0	-1.46368	0.0530594	0.0781066	13.4587	4.27176
A430078I02Rik	9.11675	13.146	11.7028	6.08188	2.85311	12.8393	7.41958	-0.520582	0.366205	0.432793	11.3218	7.29848
A430088P11Rik	9.43112	10.3036	8.70208	24.3275	39.9435	89.8754	37.0979	2.36371	1.09414e-07	3.23681e-07	9.47894	47.8111
A430090L17Rik	33.3233	34.4638	44.1106	6.08188	37.0904	55.0257	11.1294	-0.408	0.377708	0.44449	37.2992	27.3319
A430105I19Rik	471.241	753.94	387.393	42.5732	48.5029	40.3522	55.6468	-3.52813	3.949e-32	4.20978e-31	537.525	46.7688
A4galt	126.377	126.13	128.731	57.7779	51.356	53.1915	37.0979	-1.3465	5.54078e-08	1.68276e-07	127.079	49.8558
A530013C23Rik	17.2904	11.3695	13.2032	36.4913	28.5311	36.6838	18.5489	1.13784	0.00294168	0.00537939	13.9543	30.0638
A530016L24Rik	1660.19	1053.1	618.148	124.679	68.4746	126.559	66.7762	-3.44379	5.27858e-26	4.38868e-25	1110.48	96.6221
A530032D15Rik	11.6317	12.7907	18.6045	0	0	1.83419	0	-4.04173	0.000558702	0.00112006	14.3423	0.458548
A530053G22Rik	92.7393	135.723	126.03	0	0	1.83419	0	-7.09385	2.26508e-11	8.83735e-11	118.164	0.458548
A530064D06Rik	5.65867	7.10594	8.70208	0	2.85311	0	3.70979	-2.34922	0.0477247	0.0709775	7.15556	1.64072
A530065N20Rik	2.82934	2.48708	1.50036	0	0	0	0	-2.14892	0.171431	NA	2.27226	0
A530072M11Rik	14.7754	21.3178	22.5054	3.04094	5.70622	5.50257	0	-2.3201	0.00177449	0.00333712	19.5329	3.56243
A530088E08Rik	0.628741	1.06589	0.900216	0	0	0	0	-0.692765	0.772625	NA	0.864949	0
A530099J19Rik	9.43112	14.5672	18.0043	9.12282	0	3.66838	11.1294	-1.27251	0.0704436	0.100917	14.0009	5.98014
A630001G21Rik	36.7814	47.2545	36.9088	6.08188	11.4124	29.3471	18.5489	-1.21524	0.00730952	0.012564	40.3149	16.3476
A630012P03Rik	2.20059	1.06589	4.80115	0	0	0	3.70979	-1.68721	0.245987	0.307524	2.68921	0.927447
A630019I02Rik	0	3.55297	1.50036	0	0	3.66838	0	0.642096	0.746702	0.789955	1.68444	0.917096
A630020A06	1.57185	1.42119	3.60086	0	0	1.83419	3.70979	-0.644101	0.649677	0.704679	2.19797	1.386
A630023A22Rik	0.943112	1.77648	1.20029	54.7369	59.9153	49.5232	37.0979	5.34842	1.01214e-19	6.35119e-19	1.30663	50.3183
A630033H20Rik	54.3861	59.6899	99.9239	15.2047	11.4124	25.6787	18.5489	-1.9106	1.02439e-06	2.77121e-06	71.3333	17.7112
A630066F11Rik	19.1766	23.4496	27.6066	30.4094	25.678	20.1761	37.0979	0.250423	0.482696	0.548321	23.4109	28.3403
A630072M18Rik	106.886	125.775	149.136	42.5732	88.4464	97.2121	44.5175	-0.837355	0.000979376	0.00190879	127.266	68.1873
A630075F10Rik	7.54489	5.32945	10.5025	3.04094	0	0	7.41958	-1.85827	0.0784277	0.111162	7.79229	2.61513
A630076J17Rik	0.314371	1.06589	1.20029	9.12282	11.4124	5.50257	11.1294	3.62315	3.2911e-05	7.63791e-05	0.860183	9.2918
A630077J23Rik	15.7185	12.0801	17.7042	21.2866	17.1187	36.6838	14.8392	0.595032	0.224909	0.284162	15.1676	22.4821
A630089N07Rik	40.2394	33.0426	67.8162	33.4503	68.4746	62.3625	37.0979	0.154277	0.668373	0.721343	47.0328	50.3463
A630095N17Rik	0.314371	0.710594	0.300072	6.08188	11.4124	7.33676	3.70979	4.11161	4.69893e-05	0.000107065	0.441679	7.13522
A730017C20Rik	0.314371	0.355297	2.40058	0	0	0	0	-0.751864	0.770188	NA	1.02341	0
A730017L22Rik	61.3023	72.4806	63.0151	24.3275	51.356	64.1967	40.8077	-0.503527	0.0712586	0.101921	65.5993	45.172
A730020E08Rik	0.943112	7.81653	1.20029	3.04094	0	3.66838	0	-0.625373	0.669613	0.722411	3.31998	1.67733
A730020M07Rik	9.43112	8.52713	7.80187	0	5.70622	0	0	-2.56733	0.0488206	0.0724289	8.5867	1.42656
A730056A06Rik	15.0898	20.2519	11.7028	0	0	1.83419	3.70979	-3.55327	0.00144049	0.00274321	15.6815	1.386
A730085K08Rik	5.65867	4.61886	3.90093	3.04094	34.2373	22.0103	25.9685	2.15422	2.23416e-05	5.28227e-05	4.72616	21.3143
A730090H04Rik	3.14371	4.97416	4.20101	0	0	0	0	-2.96993	0.0342075	0.0523119	4.10629	0
A730090N16Rik	3.77245	3.55297	3.30079	0	5.70622	12.8393	3.70979	0.767591	0.267279	0.330473	3.54207	5.56384
A830009L08Rik	2.82934	1.06589	5.70137	0	2.85311	1.83419	0	-1.23676	0.341189	0.407564	3.19886	1.17183
A830010M20Rik	210.628	209.27	267.964	39.5322	14.2656	12.8393	48.2273	-3.0989	7.34338e-17	3.94403e-16	229.287	28.7161
A830018L16Rik	63.1885	65.3746	48.6116	9.12282	2.85311	0	0	-4.44225	2.6224e-08	8.15653e-08	59.0583	2.99398
A830052D11Rik	6.60178	3.55297	3.90093	6.08188	0	3.66838	3.70979	-0.460665	0.600477	0.659833	4.68523	3.36501
A830080D01Rik	256.526	299.871	375.39	85.1463	62.7684	110.051	100.164	-1.75867	5.01721e-16	2.56963e-15	310.596	89.5326
A830082K12Rik	18.2335	27.3579	31.2075	0	0	5.50257	11.1294	-2.64874	0.000281838	0.0005874	25.5996	4.15799
A830082N09Rik	59.416	74.2571	106.225	24.3275	54.2091	44.0206	18.5489	-1.08929	0.000623668	0.00124321	79.9662	35.2765
A930001C03Rik	2.20059	3.55297	5.10122	0	2.85311	1.83419	3.70979	-0.732366	0.485609	0.551148	3.61826	2.09927
A930003O13Rik	0.943112	0.710594	2.40058	0	2.85311	1.83419	0	0.0835761	0.957849	NA	1.35143	1.17183
A930004D18Rik	29.5508	29.8449	32.7078	21.2866	11.4124	9.17096	7.41958	-1.33868	0.00350149	0.00632094	30.7012	12.3224
A930005H10Rik	18.8622	27.3579	21.3051	36.4913	31.3842	23.8445	14.8392	0.275257	0.457962	0.523961	22.5084	26.6398
A930006I01Rik	0.314371	0.355297	0.300072	21.2866	2.85311	20.1761	14.8392	5.56413	1.36369e-07	3.99918e-07	0.323246	14.7887
A930006K02Rik	12.8892	11.7248	9.30223	0	2.85311	5.50257	3.70979	-1.83383	0.0221308	0.0350367	11.3054	3.01637
A930007I19Rik	10.3742	13.146	13.5032	9.12282	2.85311	5.50257	3.70979	-1.18839	0.0674094	0.0969487	12.3412	5.29707
A930009A15Rik	1.57185	3.19767	2.40058	0	0	0	0	-2.17996	0.277901	NA	2.39003	0
A930012L18Rik	7.85926	12.4354	7.20173	15.2047	11.4124	14.6735	33.3881	0.982379	0.0480165	0.0713488	9.16546	18.6697
A930013F10Rik	56.2723	62.177	65.7157	18.2456	59.9153	82.5386	48.2273	-0.195621	0.595864	0.655574	61.3883	52.2317
A930015D03Rik	29.8652	24.8708	31.8076	15.2047	19.9718	33.0154	18.5489	-0.347111	0.330118	0.395823	28.8479	21.6852
A930016O22Rik	0.628741	0.710594	2.40058	0	8.55933	3.66838	0	1.52901	0.206017	0.263147	1.24664	3.05693
A930017M01Rik	2.51496	3.55297	0.900216	6.08188	5.70622	5.50257	0	1.06635	0.28811	0.352385	2.32272	4.32267
A930019D19Rik	24.8353	23.8049	26.4063	3.04094	2.85311	12.8393	0	-2.21095	0.00149108	0.00283381	25.0155	4.68335
A930024E05Rik	10.6886	8.52713	11.4027	3.04094	8.55933	20.1761	14.8392	0.269499	0.61162	0.670204	10.2062	11.6539
A930041C12Rik	6.91615	6.39535	13.2032	0	2.85311	1.83419	0	-2.67555	0.0140455	0.0230264	8.83822	1.17183
AA388235	16.6616	20.6072	23.1055	24.3275	37.0904	12.8393	25.9685	0.302797	0.488293	0.553786	20.1248	25.0565
AA413626	5.02993	6.39535	6.30151	3.04094	2.85311	3.66838	0	-1.15001	0.211561	0.269413	5.90893	2.39061
AA414768	10.3742	15.6331	16.804	0	5.70622	5.50257	3.70979	-1.85449	0.0139548	0.0228866	14.2704	3.72965
AA415398	34.2664	42.2803	51.3123	57.7779	39.9435	40.3522	22.2587	-0.0370933	0.911705	0.930046	42.6197	40.0831
AA465934	1.57185	1.42119	0.900216	3.04094	5.70622	1.83419	7.41958	1.68936	0.0608576	0.0884373	1.29775	4.50023
AA467197	5.65867	14.9225	7.20173	3.04094	0	0	14.8392	-1.12111	0.352212	0.41857	9.26096	4.47002
AA474331	25.1496	27.0026	25.8062	24.3275	17.1187	14.6735	22.2587	-0.448511	0.243903	0.305397	25.9861	19.5946
AA543186	10.0599	12.7907	10.8026	15.2047	19.9718	16.5077	14.8392	0.579271	0.196426	0.252424	11.2177	16.6308
AA986860	25.464	21.3178	26.4063	48.655	68.4746	58.6941	48.2273	1.20882	1.67646e-05	4.01258e-05	24.3961	56.0128
Aaas	100.284	71.0594	83.1199	133.801	68.4746	67.8651	66.7762	-0.063489	0.815144	0.84919	84.8212	84.2293
Aacs	1070.75	416.053	255.061	1392.75	2139.83	2307.41	1769.57	1.92095	1.24144e-13	5.56192e-13	580.62	1902.39
Aaed1	290.478	365.245	412.599	608.188	447.938	396.185	363.559	0.408764	0.0929109	0.129489	356.108	453.968
Aagab	405.852	492.797	386.793	599.065	559.21	568.599	604.696	0.44446	0.000257192	0.000538292	428.481	582.892
Aak1	983.351	1158.62	1138.17	629.474	810.283	816.215	760.507	-0.521147	9.40881e-07	2.55322e-06	1093.38	754.12
Aamdc	306.826	290.988	233.756	243.275	148.362	154.072	233.717	-0.528598	0.0108715	0.0181561	277.19	194.856
Aamp	568.068	355.652	255.661	1818.48	1786.05	1438.01	1502.46	2.09456	3.99552e-58	9.7357e-57	393.127	1636.25
Aanat	3.45808	0.710594	1.80043	3.04094	2.85311	0	3.70979	0.213034	0.85439	0.882723	1.9897	2.40096
Aar2	217.544	186.176	157.838	374.036	339.52	308.144	215.168	0.729167	1.07138e-05	2.61841e-05	187.186	309.217
Aard	3.45808	5.32945	1.80043	0	0	0	0	-2.78753	0.0581536	0.0848878	3.52932	0
Aars	877.094	754.651	564.135	1152.52	1403.73	1355.47	1305.85	0.838417	4.3594e-10	1.54616e-09	731.96	1304.39
Aars2	72.3052	37.6615	28.5068	170.293	151.215	121.057	152.101	1.74199	2.30176e-19	1.41646e-18	46.1578	148.666
Aarsd1	190.194	153.133	97.5234	273.685	211.13	207.264	237.427	0.665139	3.84469e-05	8.84849e-05	146.95	232.376
Aasdh	170.703	144.606	177.042	103.392	128.39	141.233	163.231	-0.298567	0.0975996	0.135409	164.117	134.061
Aasdhppt	439.176	547.868	575.238	495.673	410.848	447.543	575.017	-0.103626	0.423935	0.490178	520.76	482.27
Aass	37.0957	77.81	47.1113	1246.79	1215.42	1104.18	1250.2	4.5351	9.80826e-145	1.0825e-142	54.0057	1204.15
Aatf	169.446	188.663	185.744	288.889	396.582	365.004	359.85	0.971392	1.54913e-09	5.28776e-09	181.284	352.581
Aatk	129.835	69.6382	31.2075	42.5732	51.356	62.3625	63.0664	-0.36497	0.251001	0.31289	76.8936	54.8395
AB124611	41.8113	39.438	61.5147	21.2866	5.70622	5.50257	14.8392	-2.07768	2.76317e-05	6.46067e-05	47.588	11.8336
Abat	441.062	834.237	493.318	45.6141	48.5029	45.8548	29.6783	-3.72852	6.96663e-32	7.33407e-31	589.539	42.4125
Abca1	6816.5	8768.02	9004.86	1143.39	650.509	1065.67	834.703	-3.12003	5.57558e-51	1.10764e-49	8196.46	923.568
Abca12	2.82934	2.48708	1.80043	3.04094	0	0	0	-1.49718	0.282575	0.346267	2.37228	0.760235
Abca13	0	1.06589	1.50036	0	0	1.83419	0	0.975673	0.619534	NA	0.855417	0.458548
Abca17	2.20059	6.04005	3.00072	0	0	0	0	-2.78228	0.0801224	0.113284	3.74712	0
Abca2	466.526	222.771	197.447	425.732	459.351	480.558	359.85	0.631814	8.21399e-09	2.65661e-08	295.581	431.372
Abca3	1023.28	736.531	610.646	1006.55	1121.27	918.93	920.028	0.335809	0.00592665	0.0103364	790.151	991.695
Abca4	13.5179	9.59302	10.5025	6.08188	11.4124	7.33676	3.70979	-0.641625	0.273544	0.336716	11.2045	7.13522
Abca5	389.819	530.814	598.643	155.088	108.418	181.585	144.682	-1.72114	9.27936e-25	7.32544e-24	506.426	147.443
Abca6	368.128	397.933	806.593	149.006	82.7402	91.7096	122.423	-2.20756	1.68495e-16	8.86359e-16	524.218	111.47
Abca7	194.281	117.248	79.219	337.544	442.232	401.688	263.395	1.52991	1.19766e-16	6.37167e-16	130.249	361.215
Abca8a	1562.42	1267.7	1917.16	650.761	439.379	640.133	575.017	-1.45237	1.45746e-13	6.49186e-13	1582.43	576.323
Abca8b	497.334	659.431	669.76	94.2691	108.418	111.886	133.552	-2.427	7.99371e-47	1.4046e-45	608.842	112.031
Abca9	1160.97	1334.14	2088.5	355.79	208.277	322.818	307.913	-2.31077	5.25807e-30	5.15908e-29	1527.87	298.699
Abcb10	283.248	309.108	244.859	328.421	316.695	306.31	304.203	0.170642	0.211122	0.268935	279.072	313.907
Abcb11	0	1.77648	3.00072	33.4503	65.6215	45.8548	37.0979	5.61461	1.62675e-13	7.23639e-13	1.5924	45.5061
Abcb1a	358.382	488.889	598.643	106.433	48.5029	71.5335	66.7762	-2.67169	2.29458e-33	2.56805e-32	481.972	73.3114
Abcb1b	215.344	326.873	331.279	63.8597	48.5029	38.518	44.5175	-2.55567	9.84214e-30	9.56239e-29	291.165	48.8495
Abcb4	36.7814	42.2803	47.7114	0	5.70622	3.66838	0	-3.96326	2.1019e-06	5.53967e-06	42.2577	2.34365
Abcb6	259.984	220.639	143.734	498.714	442.232	396.185	356.14	1.0307	1.3785e-11	5.445e-11	208.119	423.318
Abcb7	452.065	589.438	736.676	830.176	670.481	689.656	845.832	0.377892	0.0032096	0.00583268	592.726	759.036
Abcb8	261.556	118.669	88.2211	279.766	336.667	286.134	196.619	0.935132	6.41816e-08	1.93911e-07	156.149	274.797
Abcb9	80.4789	45.8333	22.2053	155.088	228.249	212.766	196.619	2.13503	1.90641e-15	9.4709e-15	49.5058	198.18
Abcc1	1147.77	1082.59	887.313	182.456	97.0057	187.087	189.199	-2.66311	1.35126e-33	1.52523e-32	1039.22	163.937
Abcc10	58.4729	31.2661	25.5061	109.474	194.011	205.429	107.584	2.08097	8.49841e-20	5.34466e-19	38.4151	154.125
Abcc12	1.88622	3.90827	3.30079	0	0	0	0	-2.51167	0.131843	0.177239	3.03176	0
Abcc2	16.3473	17.4096	3.30079	0	2.85311	0	0	-3.86258	0.00505458	0.00891309	12.3525	0.713278
Abcc3	202.769	236.273	158.438	54.7369	31.3842	42.1864	22.2587	-2.3904	8.62917e-14	3.89917e-13	199.16	37.6416
Abcc4	215.658	222.771	205.549	139.883	88.4464	89.8754	77.9056	-1.11919	4.78682e-08	1.46167e-07	214.66	99.0276
Abcc5	710.163	768.863	702.168	155.088	151.215	196.258	181.78	-2.07788	4.86722e-44	7.84235e-43	727.065	171.085
Abcc6	0.943112	1.06589	0.900216	0	0	1.83419	0	-0.203802	0.899777	NA	0.969739	0.458548
Abcc8	14.7754	4.61886	5.10122	0	0	0	0	-3.87406	0.00995538	0.0167453	8.16517	0
Abcc9	1209.38	1487.63	1323.32	608.188	650.509	915.261	567.598	-0.95108	7.62576e-09	2.47251e-08	1340.11	685.389
Abcd1	159.7	116.182	126.93	322.34	231.102	229.274	233.717	0.910092	1.534e-07	4.47686e-07	134.271	254.108
Abcd2	10795.2	14057	13818	440.936	205.424	427.367	359.85	-5.14278	1.05238e-130	9.71061e-129	12890.1	358.394
Abcd3	1274.14	1899.06	1565.17	2782.46	3318.17	2826.49	2837.99	0.922014	2.94116e-13	1.28931e-12	1579.46	2941.28
Abcd4	110.658	68.217	73.2175	255.439	219.689	293.471	237.427	1.60552	1.26352e-22	9.06746e-22	84.031	251.506
Abce1	1486.97	2209.95	2083.7	2669.94	2590.62	2358.77	3223.81	0.513834	3.92122e-06	1.00218e-05	1926.87	2710.79
Abcf1	486.646	416.053	335.48	1575.21	1426.56	1260.09	1250.2	1.73419	3.24908e-64	9.36244e-63	412.726	1378.01
Abcf2	608.307	495.284	414.699	945.732	978.617	768.526	875.51	0.807301	7.58047e-18	4.30265e-17	506.097	892.096
Abcf3	514.625	450.517	414.699	948.773	824.549	863.904	931.157	0.94924	2.10333e-18	1.22303e-17	459.947	892.096
Abcg1	398.622	362.758	373.589	130.76	128.39	161.409	159.521	-1.37732	2.0006e-20	1.29533e-19	378.323	145.02
Abcg2	516.511	617.506	759.482	31288.2	17192.8	16617.8	22518.4	5.07536	1.05915e-114	7.5783e-113	631.166	21904.3
Abcg3	103.742	116.182	172.841	18.2456	31.3842	36.6838	18.5489	-2.23077	3.25556e-12	1.33398e-11	130.922	26.2157
Abcg4	12.8892	3.90827	6.90165	18.2456	0	9.17096	14.8392	0.464083	0.485531	0.551097	7.8997	10.5639
Abcg8	0.943112	0.355297	0.300072	0	2.85311	0	0	0.876161	0.663342	NA	0.532827	0.713278
Abhd1	2.20059	0.710594	0.600144	0	2.85311	1.83419	3.70979	0.936683	0.45209	0.518192	1.17044	2.09927
Abhd10	116.631	171.964	142.234	72.9825	68.4746	97.2121	70.486	-0.83632	0.000317248	0.000656824	143.61	77.2888
Abhd11	215.658	116.893	106.826	504.796	493.588	469.553	474.853	1.77031	3.95772e-52	8.15002e-51	146.459	485.698
Abhd11os	2.20059	1.06589	1.80043	218.948	182.599	148.569	189.199	6.77776	7.9356e-50	1.51928e-48	1.68897	184.829
Abhd12	888.097	1018.99	812.895	617.311	368.051	420.03	497.112	-0.941007	3.33426e-08	1.02892e-07	906.661	475.626
Abhd13	532.544	709.883	743.878	1560	1386.61	1261.92	1431.98	1.10861	1.55627e-46	2.68978e-45	662.102	1410.13
Abhd14a	82.9938	45.1227	36.0086	142.924	134.096	124.725	163.231	1.40853	1.1382e-11	4.51379e-11	54.7084	141.244
Abhd14b	255.269	267.539	249.96	653.802	593.447	469.553	474.853	1.08899	1.83946e-12	7.66183e-12	257.589	547.914
Abhd15	560.837	552.842	415.9	124.679	42.7967	71.5335	85.3252	-2.66975	1.50653e-20	9.82213e-20	509.86	81.0834
Abhd16a	412.769	250.484	168.04	732.866	542.091	519.076	608.406	1.16349	2.7744e-12	1.14237e-11	277.098	600.61
Abhd16b	0.943112	2.84238	1.20029	6.08188	8.55933	11.0051	0	2.12419	0.00969096	0.0163299	1.66193	6.41159
Abhd17a	81.7363	32.6873	18.9045	298.012	333.814	350.331	293.073	3.05011	2.19315e-71	7.36253e-70	44.4427	318.807
Abhd17b	377.559	632.784	555.733	781.521	624.831	586.941	738.248	0.419615	0.000391241	0.000801468	522.025	682.885
Abhd17c	259.984	264.696	223.554	772.399	870.199	709.832	660.343	1.6121	1.07217e-15	5.37707e-15	249.411	753.193
Abhd2	1004.73	734.399	847.403	510.878	676.187	544.755	523.08	-0.613607	1.20868e-06	3.25152e-06	862.177	563.725
Abhd3	150.269	98.7726	101.124	100.351	25.678	29.3471	48.2273	-1.24473	0.00115297	0.00222631	116.722	50.9008
Abhd4	579.699	498.126	461.811	726.785	502.147	460.382	523.08	0.106916	0.555726	0.618671	513.212	553.099
Abhd5	1441.7	2069.6	1418.44	8392.99	7466.59	7182.69	8643.81	2.27587	3.55249e-43	5.55438e-42	1643.25	7921.52
Abhd6	123.233	132.526	130.831	27.3685	8.55933	29.3471	22.2587	-2.52253	6.87892e-13	2.94517e-12	128.863	21.8834
Abhd8	12.8892	6.04005	5.10122	54.7369	54.2091	64.1967	89.035	3.11564	4.64609e-18	2.65765e-17	8.01015	65.5444
Abi1	803.217	1101.42	1193.09	1322.81	1221.13	1227.07	1398.59	0.353695	3.30151e-05	7.65997e-05	1032.57	1292.4
Abi2	657.034	841.343	963.831	185.497	293.87	346.662	304.203	-1.50017	6.57387e-17	3.54426e-16	820.736	282.558
Abi3	33.3233	33.0426	22.2053	24.3275	42.7967	56.8599	48.2273	0.572128	0.0639526	0.0924812	29.5237	43.0528
Abi3bp	707.648	762.823	862.407	72.9825	97.0057	133.896	122.423	-2.84099	4.40843e-65	1.29013e-63	777.626	106.577
Abl1	786.555	469.347	511.623	894.036	873.052	854.733	812.444	0.558456	2.44085e-08	7.61288e-08	589.175	858.566
Abl2	554.55	631.007	714.171	738.948	798.871	869.407	667.762	0.305803	0.00491784	0.00868738	633.243	768.747
Ablim1	2696.36	3005.81	2939.2	696.375	744.662	834.557	760.507	-1.91329	1.24826e-75	4.57226e-74	2880.46	759.025
Ablim2	61.6166	38.3721	28.8069	79.0644	119.831	128.393	89.035	1.33036	1.92245e-08	6.05869e-08	42.9319	104.081
Ablim3	682.184	654.457	547.931	337.544	253.927	385.18	348.72	-0.921215	1.39659e-08	4.43955e-08	628.191	331.343
Abo	4.08682	0	1.20029	0	0	0	0	-1.47338	0.60069	NA	1.76237	0
Abr	385.733	328.294	319.577	1976.61	2214.01	2010.27	2303.78	2.61798	1.80618e-61	4.84114e-60	344.535	2126.17
Abra	9.43112	7.81653	10.5025	0	0	1.83419	3.70979	-2.78755	0.0121845	0.0201753	9.25006	1.386
Abracl	188.308	225.969	302.172	416.609	359.492	355.833	408.077	0.70971	5.14599e-06	1.30219e-05	238.816	385.003
Abt1	106.257	67.1511	75.318	127.719	142.656	135.73	152.101	0.749383	1.35845e-05	3.28966e-05	82.9088	139.552
Abtb1	75.7633	31.9767	29.7071	288.889	211.13	168.746	211.458	2.39197	1.73023e-17	9.58551e-17	45.8157	220.056
Abtb2	28.2934	18.8307	22.2053	553.451	353.786	366.838	370.979	4.13608	1.96359e-84	8.35195e-83	23.1098	411.263
Acaa1a	464.954	279.974	221.153	574.738	456.498	396.185	389.528	0.536704	0.00206048	0.00384031	322.027	454.237
Acaa1b	213.772	155.975	74.7179	12.1638	8.55933	5.50257	11.1294	-4.03448	4.11662e-12	1.67826e-11	148.155	9.33876
Acaa2	939.654	949.354	658.358	687.252	507.854	429.201	530.5	-0.653607	0.00233057	0.00431372	849.122	538.702
Acaca	8389.29	5351.84	3418.72	30713.5	39090.5	40680.5	35150.3	2.74378	1.34436e-19	8.36126e-19	5719.95	36408.7
Acacb	364.984	146.382	112.827	15569.6	27041.8	25796.1	19049.8	6.88729	8.27134e-123	6.52663e-121	208.065	21864.3
Acad10	99.6555	87.0478	72.3173	118.597	111.271	176.082	140.972	0.680683	0.000702313	0.00139111	86.3402	136.731
Acad11	1690.68	1954.49	1684	772.399	633.39	599.781	652.923	-1.41832	1.28872e-17	7.2105e-17	1776.39	664.623
Acad12	111.602	82.0736	73.8177	36.4913	31.3842	38.518	33.3881	-1.3373	9.35685e-06	2.30153e-05	89.1643	34.9454
Acad8	438.861	459.754	387.693	541.287	473.616	432.869	445.175	0.13529	0.245134	0.306685	428.769	473.237
Acad9	948.456	958.236	792.49	1070.41	1146.95	1073	1131.49	0.29294	0.00261739	0.00481504	899.727	1105.46
Acadl	2009.77	2735.79	1936.66	778.481	299.577	344.828	541.629	-2.09364	8.84352e-08	2.6393e-07	2227.41	491.129
Acadm	3140.56	4418.12	3422.62	1061.29	718.984	693.324	838.412	-2.13483	1.04816e-33	1.18946e-32	3660.43	828.002
Acads	490.732	189.373	122.429	416.609	359.492	335.657	281.944	0.582151	0.00507765	0.00895096	267.512	348.425
Acadsb	2738.48	3270.51	3098.54	6410.3	4893.08	4462.59	5653.72	0.802573	5.53797e-14	2.53701e-13	3035.84	5354.92
Acadvl	1558.96	1169.28	970.733	1508.31	1241.1	1023.48	1131.49	0.00312609	0.985263	0.989011	1232.99	1226.09
Acan	1.25748	0.355297	2.40058	6.08188	5.70622	1.83419	7.41958	1.92083	0.0784308	0.111162	1.33778	5.26047
Acap1	17.6048	15.2778	13.8033	15.2047	11.4124	23.8445	22.2587	0.233495	0.562439	0.624579	15.5619	18.1801
Acap2	1471.25	1619.44	1972.07	3719.07	3794.64	3752.76	3257.2	1.12125	1.50506e-17	8.37929e-17	1687.59	3630.91
Acap3	190.194	121.156	109.226	161.17	139.802	166.911	174.36	0.211041	0.188173	0.242815	140.192	160.561
Acat1	2990.61	3388.47	2834.18	1407.96	1124.13	1014.31	1287.3	-1.36594	6.54678e-48	1.19254e-46	3071.08	1208.42
Acat2	437.604	542.183	350.784	2374.97	875.905	863.904	1005.35	1.41661	3.50329e-08	1.0791e-07	443.524	1280.03
Acat3	3.14371	7.10594	10.8026	0	8.55933	14.6735	7.41958	0.397761	0.520637	0.585124	7.01741	7.66311
Acbd3	693.187	864.793	885.512	562.574	676.187	720.837	552.759	-0.345983	0.00406619	0.00726448	814.497	628.089
Acbd4	796.301	450.517	221.453	231.111	233.955	236.611	196.619	-1.01591	1.03657e-05	2.53527e-05	489.423	224.574
Acbd5	1084.26	1628.33	1651.3	982.223	1095.59	975.79	1061	-0.459457	2.48008e-07	7.09566e-07	1454.63	1028.65
Acbd6	108.772	105.523	97.8234	167.252	156.921	135.73	115.003	0.465487	0.0061718	0.010733	104.04	143.727
Acbd7	0.314371	1.06589	0.600144	130.76	156.921	203.595	170.65	8.37191	5.59028e-35	6.592e-34	0.660135	165.482
Accs	100.284	79.5865	80.7193	82.1054	45.6498	45.8548	59.3566	-0.604383	0.0187456	0.0300749	86.8634	58.2416
Accsl	0.314371	0.710594	0.900216	3.04094	0	1.83419	0	1.26561	0.458469	NA	0.641727	1.21878
Acd	37.4101	23.0943	23.7057	167.252	188.305	154.072	129.843	2.52709	1.47254e-37	1.90978e-36	28.07	159.868
Ace	546.376	463.307	545.531	4056.61	853.08	667.646	979.385	1.47801	0.00951144	0.0160466	518.405	1639.18
Ace2	8.48801	8.52713	4.50108	723.744	276.752	458.548	456.304	6.03924	1.01189e-71	3.41052e-70	7.17207	478.837
Acer2	283.248	306.621	254.761	243.275	154.068	218.269	155.811	-0.534783	0.0253364	0.0396911	281.543	192.856
Acer3	283.248	476.809	501.72	285.848	176.893	179.751	255.975	-0.860728	1.45313e-06	3.88253e-06	420.592	224.617
Ache	5.97304	3.55297	1.50036	0	14.2656	7.33676	3.70979	0.912647	0.292808	0.357145	3.67546	6.32803
Acin1	704.19	584.108	556.333	1125.15	1141.24	1232.58	1064.71	0.895353	1.0747e-26	9.21184e-26	614.877	1140.92
Ackr1	39.9251	41.2145	41.4099	15.2047	11.4124	7.33676	3.70979	-2.12608	8.38838e-06	2.07692e-05	40.8498	9.41592
Ackr2	55.6436	25.5814	56.4135	27.3685	8.55933	14.6735	25.9685	-1.28198	0.00786414	0.0134516	45.8795	19.1425
Ackr3	280.733	333.979	249.66	818.013	590.594	443.874	656.633	1.1336	7.04433e-06	1.7578e-05	288.124	627.278
Ackr4	33.952	18.8307	38.7093	139.883	39.9435	62.3625	70.486	1.25528	0.00691331	0.0119255	30.4973	78.1688
Acly	9118.63	4683.88	2441.08	42737.4	40285.9	42599.1	40484.9	3.09271	5.00479e-28	4.52656e-27	5414.53	41526.8
Acmsd	3.14371	5.68475	3.60086	12.1638	0	3.66838	7.41958	0.419692	0.607089	0.666102	4.14311	5.81293
Acnat1	1.25748	0	3.00072	0	0	0	0	-1.61884	0.49818	NA	1.4194	0
Aco1	2766.78	2214.57	2084	1824.56	2430.85	2026.78	1806.67	-0.220778	0.12552	0.169643	2355.11	2022.22
Aco2	3507.43	2309.79	1789.93	8593.7	6798.96	5788.71	6340.03	1.44562	1.85195e-35	2.22418e-34	2535.72	6880.35
Acot1	93.3681	21.6731	82.5198	836.258	293.87	295.305	330.171	2.88108	9.13217e-06	2.24757e-05	65.8536	438.901
Acot10	4.40119	2.84238	3.30079	0	0	0	0	-2.84912	0.190967	0.246083	3.51478	0
Acot11	23.5778	25.2261	18.3044	15.2047	28.5311	11.0051	22.2587	-0.27292	0.511242	0.575714	22.3694	19.2499
Acot12	0	1.42119	2.1005	3.04094	0	1.83419	0	1.29234	0.427544	NA	1.1739	1.21878
Acot13	180.763	200.032	171.941	361.872	322.401	344.828	445.175	0.994723	5.3618e-07	1.4884e-06	184.245	368.569
Acot2	154.356	125.775	114.627	76.0235	51.356	49.5232	59.3566	-1.16895	1.5004e-05	3.61267e-05	131.586	59.0648
Acot3	0.628741	0	0.300072	54.7369	31.3842	7.33676	33.3881	6.43752	3.54953e-11	1.36781e-10	0.309604	31.7115
Acot4	20.7485	31.6214	29.107	42.5732	34.2373	55.0257	14.8392	0.53686	0.151086	0.20016	27.159	36.6688
Acot5	0.628741	0	0	33.4503	8.55933	1.83419	11.1294	6.04356	3.30101e-06	8.50746e-06	0.20958	13.7433
Acot6	43.6975	25.5814	37.509	541.287	276.752	365.004	281.944	3.33864	8.465e-27	7.29286e-26	35.596	366.247
Acot7	161.272	83.8501	60.6145	42.5732	34.2373	47.689	59.3566	-1.08453	3.30099e-05	7.65983e-05	101.912	45.964
Acot8	50.6137	29.4897	25.8062	79.0644	97.0057	89.8754	92.7447	1.37614	4.91099e-11	1.86941e-10	35.3032	89.6726
Acot9	691.301	1010.46	963.231	392.281	368.051	361.336	385.818	-1.20842	1.67503e-23	1.24987e-22	888.332	376.872
Acox1	6343.68	7096.7	5124.93	1854.97	1423.7	1518.71	1253.91	-2.02685	8.64573e-25	6.83482e-24	6188.44	1512.82
Acox2	6.28741	2.84238	2.1005	88.1872	74.1809	128.393	118.713	4.91275	5.94074e-33	6.54372e-32	3.74343	102.369
Acox3	386.047	375.904	316.276	480.468	479.322	546.589	356.14	0.381012	0.0083883	0.0142873	359.409	465.63
Acoxl	18.2335	27.0026	5.10122	3.04094	0	1.83419	0	-3.6124	0.00247705	0.00456931	16.7791	1.21878
Acp1	449.236	441.989	406.597	440.936	350.933	308.144	374.689	-0.252007	0.0345847	0.0528265	432.607	368.675
Acp2	627.484	777.745	617.848	255.439	208.277	212.766	218.878	-1.58964	4.60596e-25	3.68084e-24	674.359	223.84
Acp5	2046.55	1469.86	862.707	599.065	459.351	542.921	426.626	-1.48508	9.83932e-13	4.16512e-12	1459.71	506.991
Acp6	235.149	214.955	160.238	212.866	216.836	238.445	230.007	0.141719	0.417159	0.483802	203.447	224.538
Acpp	48.7274	37.6615	54.0129	12.1638	14.2656	23.8445	0	-1.75614	0.000790189	0.00155496	46.8006	12.5684
Acpt	2.20059	1.06589	1.50036	3.04094	2.85311	7.33676	7.41958	1.67902	0.0480439	0.0713769	1.58895	5.1626
Acr	3.45808	3.19767	6.00144	0	2.85311	9.17096	0	-0.248928	0.80243	0.83848	4.21906	3.00602
Acrbp	25.1496	18.4754	18.0043	39.5322	77.034	80.7044	40.8077	1.55342	4.62989e-07	1.29523e-06	20.5431	59.5196
Acrv1	0	0	0	15.2047	5.70622	12.8393	3.70979	7.40375	1.75107e-07	5.08401e-07	0	9.36501
Acsbg1	44.0119	16.3437	24.3058	3.04094	0	1.83419	3.70979	-3.78246	3.99225e-05	9.16812e-05	28.2205	2.14623
Acsf2	250.239	181.912	150.036	63.8597	37.0904	62.3625	63.0664	-1.76959	2.7501e-13	1.20681e-12	194.062	56.5948
Acsf3	170.389	84.2054	67.2161	282.807	185.452	207.264	189.199	1.08899	2.68307e-10	9.67876e-10	107.27	216.181
Acsl1	21688.4	22316.2	13338.8	76376.2	69276.4	67171.7	70304.2	1.88762	5.30474e-23	3.86937e-22	19114.5	70782.1
Acsl3	359.954	341.796	378.091	85.1463	88.4464	100.881	126.133	-1.85959	3.19605e-26	2.67834e-25	359.947	100.152
Acsl4	810.447	1263.44	1187.08	2159.07	2539.27	2078.14	2092.32	1.0734	8.83253e-17	4.72879e-16	1086.99	2217.2
Acsl5	1016.67	1478.75	1433.74	586.901	616.272	695.158	749.378	-0.950554	1.30597e-14	6.17893e-14	1309.72	661.927
Acsl6	5.65867	4.61886	2.70065	459.182	439.379	478.724	445.175	6.7533	1.71134e-128	1.51296e-126	4.32606	455.615
Acsm3	51.8711	51.5181	63.3152	127.719	14.2656	42.1864	66.7762	0.135901	0.822901	0.855898	55.5681	62.7369
Acsm4	1.57185	1.77648	1.20029	0	2.85311	0	0	-0.837808	0.568386	0.630147	1.51621	0.713278
Acsm5	55.0148	48.3204	58.514	36.4913	17.1187	25.6787	22.2587	-1.09317	0.0253311	0.0396864	53.9498	25.3868
Acss1	206.856	148.159	185.144	6176.15	4947.29	4668.02	6202.77	4.90507	9.38387e-206	2.36502e-203	180.053	5498.56
Acss2	2223.86	1258.11	588.441	988.305	1278.19	1362.8	1161.16	-0.0214536	0.945834	0.957802	1356.8	1197.62
Acss2os	24.8353	6.75064	6.00144	6.08188	11.4124	31.1812	3.70979	0.451605	0.4988	0.563884	12.5291	13.0963
Acss3	922.049	1066.96	1218.29	200.702	59.9153	108.217	107.584	-3.16112	1.12623e-18	6.65413e-18	1069.1	119.105
Acta1	755.432	211.402	249.66	3.04094	11.4124	218.269	7.41958	-3.29626	0.00406524	0.00726448	405.498	60.0354
Acta2	2614.93	2220.61	1408.54	5239.54	7087.13	5489.73	6915.05	1.58485	1.47298e-17	8.20614e-17	2081.36	6182.86
Actb	19200.8	18028.5	12190.4	14441.4	15629.3	14220.5	17343.3	-0.0954458	0.502476	0.567242	16473.2	15408.6
Actbl2	0	0	0	0	0	1.83419	0	3.77891	0.0611471	0.0888122	0	0.458548
Actc1	5.65867	5.68475	5.10122	0	2.85311	3.66838	0	-1.65194	0.118206	0.160763	5.48155	1.63037
Actg1	2067.3	1456.36	1142.37	1128.19	1124.13	1129.86	1576.66	-0.304741	0.0644055	0.0930486	1555.35	1239.71
Actg2	83.6226	41.925	48.3116	319.299	496.441	295.305	441.465	2.77901	1.08791e-37	1.42076e-36	57.9531	388.127
Actl10	4.71556	1.06589	1.20029	3.04094	2.85311	5.50257	0	0.724829	0.479825	0.5455	2.32725	2.84916
Actl6a	296.137	325.807	339.681	617.311	496.441	398.019	497.112	0.630552	3.9665e-07	1.11519e-06	320.542	502.221
Actl6b	2.20059	2.48708	1.20029	0	0	0	0	-1.94444	0.566594	NA	1.96265	0
Actl7a	3.45808	2.48708	4.20101	0	0	5.50257	7.41958	-0.0617435	0.955471	0.965174	3.38205	3.23054
Actl9	1.88622	1.42119	0.600144	0	5.70622	9.17096	0	1.68542	0.13318	0.17898	1.30252	3.71929
Actn1	1038.05	853.779	773.285	443.977	699.012	583.273	604.696	-0.612903	1.57948e-05	3.79121e-05	888.372	582.739
Actn2	12.8892	7.10594	10.5025	6.08188	14.2656	51.3574	14.8392	1.217	0.0893819	0.124973	10.1659	21.636
Actn3	210.943	91.6666	111.327	6.08188	2.85311	104.549	3.70979	-2.48989	0.0314086	0.0483645	137.979	29.2984
Actn4	2535.08	1663.15	1196.09	1666.43	2225.43	2305.58	2492.98	0.308094	0.0448824	0.0670403	1798.11	2172.6
Actr10	666.466	896.059	845.002	684.211	476.469	462.216	667.762	-0.491126	0.000102498	0.000224514	802.509	572.665
Actr1a	1592.6	1336.63	1037.35	988.305	1072.77	865.738	1027.61	-0.419147	0.00168493	0.00318175	1322.19	988.606
Actr1b	618.996	418.54	354.985	967.019	961.498	821.718	771.636	0.937719	1.03442e-20	6.79259e-20	464.174	880.468
Actr2	2101.25	3369.64	3325.1	2554.39	2054.24	1854.37	2300.07	-0.384052	1.21988e-05	2.96653e-05	2932	2190.77
Actr3	1755.13	2489.57	2529.61	1499.18	1306.72	1219.74	1565.53	-0.669255	6.87244e-13	2.94314e-12	2258.1	1397.79
Actr3b	38.6676	63.2429	43.5104	6.08188	0	0	11.1294	-3.76954	8.10722e-07	2.2134e-06	48.4736	4.30281
Actr5	51.5568	39.438	32.1077	145.965	88.4464	75.2018	51.9371	1.14469	0.000139473	0.000300401	41.0341	90.3876
Actr6	134.236	176.227	187.845	45.6141	74.1809	69.6993	74.1958	-1.30202	6.01307e-10	2.11623e-09	166.103	65.9225
Actr8	341.721	356.008	318.976	349.708	279.605	236.611	311.622	-0.221955	0.136011	0.182436	338.902	294.386
Acvr1	327.888	315.148	330.079	79.0644	136.949	139.399	103.874	-1.48783	4.34325e-14	2.00109e-13	324.372	114.822
Acvr1b	264.386	319.767	182.444	696.375	656.215	698.827	445.175	1.28634	1.3785e-08	4.38618e-08	255.532	624.148
Acvr1c	5456.53	6383.27	7107.5	228.07	77.034	192.59	133.552	-5.28379	3.98767e-79	1.52343e-77	6315.77	157.812
Acvr2a	709.534	977.422	1249.5	684.211	693.306	752.018	745.668	-0.39158	0.00141306	0.00269372	978.819	718.801
Acvr2b	16.976	5.32945	5.70137	6.08188	8.55933	20.1761	14.8392	0.624934	0.195794	0.251726	9.33561	12.4141
Acvrl1	326.002	239.825	204.349	374.036	368.051	328.32	393.238	0.508196	7.60916e-05	0.00016914	256.726	365.911
Acy1	52.1855	25.9367	24.906	155.088	162.627	170.58	137.262	2.25011	1.03267e-24	8.137e-24	34.3427	156.389
Acy3	40.8682	40.1486	23.1055	18.2456	22.8249	22.0103	29.6783	-0.583836	0.13077	0.175965	34.7074	23.1898
Acyp1	80.7932	76.3889	66.616	115.556	74.1809	78.8702	126.133	0.365357	0.11621	0.158366	74.5993	98.6849
Acyp2	267.215	351.389	230.155	69.9416	48.5029	69.6993	55.6468	-2.18706	1.48988e-17	8.29755e-17	282.92	60.9476
Ada	49.3562	34.4638	46.2111	121.638	105.565	108.217	96.4545	1.30185	2.47293e-08	7.70582e-08	43.3437	107.969
Adal	146.497	225.258	174.642	188.538	182.599	148.569	159.521	-0.0809696	0.649229	0.704315	182.132	169.807
Adam10	2003.8	2343.89	2688.94	1222.46	1192.6	1151.87	1190.84	-0.960029	1.41475e-29	1.362e-28	2345.55	1189.44
Adam11	8.48801	3.19767	4.50108	3.04094	5.70622	3.66838	7.41958	-0.13382	0.84806	0.877579	5.39559	4.95878
Adam12	443.891	412.855	267.064	36.4913	65.6215	119.222	77.9056	-2.3036	8.88332e-12	3.54787e-11	374.603	74.8102
Adam15	919.534	546.091	452.508	310.176	251.074	278.797	281.944	-1.15318	1.97718e-19	1.22072e-18	639.378	280.498
Adam17	781.84	947.222	972.233	513.919	527.825	473.221	460.014	-0.851781	9.13675e-17	4.88702e-16	900.431	493.745
Adam19	630.627	644.864	579.139	51.696	105.565	102.715	122.423	-2.69848	3.27592e-33	3.64168e-32	618.21	95.5997
Adam1a	49.0418	51.8734	58.8141	12.1638	31.3842	23.8445	33.3881	-1.09934	0.000714006	0.00141295	53.2431	25.1951
Adam1b	0.628741	0.355297	1.20029	0	0	1.83419	0	0.16484	0.946982	NA	0.728109	0.458548
Adam21	6.60178	4.97416	6.30151	0	2.85311	5.50257	3.70979	-0.931975	0.297964	0.36239	5.95915	3.01637
Adam22	177.619	270.381	291.97	69.9416	37.0904	75.2018	70.486	-1.89755	4.80014e-19	2.90287e-18	246.657	63.18
Adam23	594.789	808.301	674.562	106.433	54.2091	86.207	92.7447	-3.0187	2.12351e-54	4.60303e-53	692.55	84.8984
Adam28	0.314371	0.710594	0	0	2.85311	0	0	1.38822	0.470931	NA	0.341655	0.713278
Adam3	5.65867	8.17183	7.80187	0	0	0	3.70979	-3.07432	0.0247494	0.0388435	7.21079	0.927447
Adam30	0	2.84238	0.600144	0	0	0	0	-0.129202	0.97344	NA	1.14751	0
Adam32	4.40119	4.97416	6.00144	0	0	5.50257	0	-1.56461	0.146601	0.194983	5.12559	1.37564
Adam33	76.7064	47.9651	54.313	15.2047	28.5311	18.3419	11.1294	-1.68489	7.32071e-06	1.82327e-05	59.6615	18.3018
Adam4	56.5867	72.4806	79.219	6.08188	22.8249	53.1915	18.5489	-1.40197	0.00202937	0.00378665	69.4288	25.1618
Adam5	4.40119	5.68475	9.90237	0	2.85311	0	0	-2.82899	0.0288545	0.044713	6.66277	0.713278
Adam8	104.371	69.6382	63.3152	18.2456	22.8249	29.3471	33.3881	-1.62716	3.48321e-08	1.07312e-07	79.1081	25.9514
Adam9	1696.34	2525.81	2263.14	2095.21	1677.63	1524.21	1721.34	-0.259298	0.128543	0.173368	2161.76	1754.6
Adamdec1	4.71556	6.75064	2.1005	24.3275	14.2656	23.8445	14.8392	2.12773	2.43645e-05	5.73967e-05	4.52223	19.3192
Adamts1	989.953	1645.38	1183.48	252.398	251.074	357.667	322.752	-2.07869	6.96337e-23	5.05735e-22	1272.94	295.973
Adamts10	398.622	206.783	210.35	85.1463	85.5933	124.725	103.874	-1.38558	5.7081e-13	2.45823e-12	271.918	99.8347
Adamts12	1739.41	1237.5	1692.11	307.135	313.842	357.667	430.336	-2.14924	3.78895e-36	4.63961e-35	1556.34	352.245
Adamts13	0.628741	0	0.300072	6.08188	11.4124	3.66838	3.70979	4.55812	0.00019811	0.000420247	0.309604	6.21812
Adamts14	68.5328	30.2002	29.407	15.2047	17.1187	27.5129	25.9685	-0.902094	0.00741099	0.0127332	42.7134	21.4512
Adamts15	502.05	351.389	455.809	106.433	82.7402	75.2018	63.0664	-2.41984	2.99875e-26	2.51549e-25	436.416	81.8603
Adamts16	53.443	52.584	83.7201	0	0	1.83419	3.70979	-5.55018	1.54216e-08	4.8894e-08	63.249	1.386
Adamts17	31.1227	12.7907	9.00216	6.08188	8.55933	12.8393	0	-1.05247	0.072306	0.10327	17.6385	6.87014
Adamts18	101.227	25.2261	59.4142	21.2866	11.4124	7.33676	18.5489	-2.07276	4.59737e-05	0.000104893	61.9559	14.6462
Adamts19	13.5179	12.4354	18.0043	0	0	0	0	-4.80945	1.53707e-05	3.69572e-05	14.6525	0
Adamts2	1529.73	1557.62	1216.19	215.907	159.774	205.429	293.073	-2.7284	1.08752e-40	1.55757e-39	1434.51	218.546
Adamts20	47.47	36.2403	48.0115	0	19.9718	14.6735	14.8392	-1.82108	9.77512e-05	0.000214646	43.9072	12.3711
Adamts3	129.206	63.9535	125.43	12.1638	17.1187	25.6787	22.2587	-2.44016	2.27414e-09	7.66643e-09	106.197	19.305
Adamts4	49.9849	54.7157	45.3109	6.08188	2.85311	9.17096	0	-3.29993	1.64117e-07	4.77724e-07	50.0038	4.52649
Adamts5	8429.85	14787.5	11994.8	3731.23	8873.17	9590.99	11248.1	-0.387552	0.469743	0.535879	11737.4	8360.87
Adamts6	68.2184	92.7325	114.928	24.3275	48.5029	66.0309	40.8077	-0.939769	0.000933473	0.00182374	91.9595	44.9172
Adamts7	89.2812	34.4638	40.2096	24.3275	25.678	31.1812	18.5489	-1.00837	0.00184199	0.00345675	54.6516	24.9339
Adamts8	60.0448	15.9884	42.6102	6.08188	2.85311	12.8393	11.1294	-2.18035	0.000403152	0.000824267	39.5478	8.22592
Adamts9	938.71	724.451	682.063	243.275	433.673	464.05	274.524	-1.13896	6.52254e-09	2.12461e-08	781.741	353.881
Adamtsl1	210.628	220.284	227.454	130.76	94.1526	141.233	89.035	-0.909838	1.20402e-06	3.2395e-06	219.456	113.795
Adamtsl2	31.4371	42.9909	26.7064	0	8.55933	12.8393	0	-2.46632	0.00208315	0.00387999	33.7115	5.34967
Adamtsl3	138.952	112.274	136.233	39.5322	25.678	56.8599	25.9685	-1.74013	6.41655e-10	2.254e-09	129.153	37.0097
Adamtsl4	143.982	109.431	92.1221	63.8597	102.712	66.0309	74.1958	-0.597536	0.00830965	0.014162	115.178	76.6996
Adamtsl5	40.8682	38.3721	35.7086	79.0644	139.802	84.3728	66.7762	1.27056	1.08069e-06	2.92069e-06	38.3163	92.504
Adap1	186.422	76.7442	39.0093	9.12282	22.8249	22.0103	14.8392	-2.35624	2.1727e-08	6.8143e-08	100.725	17.1993
Adap2	210.314	370.93	226.854	79.0644	88.4464	95.3779	85.3252	-1.59746	1.1855e-10	4.3919e-10	269.366	87.0535
Adar	444.206	357.073	399.696	577.779	853.08	796.039	686.311	0.865095	1.42701e-07	4.17762e-07	400.325	728.302
Adarb1	341.092	387.629	304.573	215.907	179.746	231.108	133.552	-0.837781	7.67107e-06	1.90715e-05	344.431	190.078
Adarb2	26.4071	34.8191	25.8062	0	0	3.66838	0	-4.46359	0.000113503	0.000247306	29.0108	0.917096
Adat1	49.0418	46.1886	50.112	91.2282	48.5029	67.8651	77.9056	0.547788	0.0267966	0.0418096	48.4475	71.3754
Adat2	38.3532	31.6214	31.8076	24.3275	22.8249	29.3471	40.8077	-0.23277	0.479608	0.545401	33.9274	29.3268
Adat3	6.91615	2.48708	0.600144	3.04094	14.2656	14.6735	7.41958	1.99437	0.00167181	0.00315738	3.33446	9.8499
Adck1	145.868	120.09	80.7193	246.316	205.424	220.103	137.262	0.828395	5.37111e-05	0.000121675	115.559	202.276
Adck2	143.353	127.907	127.531	170.293	154.068	188.922	181.78	0.382907	0.010711	0.0179075	132.93	173.765
Adck3	352.409	223.837	204.349	1937.08	1888.76	1782.83	1728.76	2.83891	1.3311e-98	7.18114e-97	260.198	1834.36
Adck4	112.859	73.1912	50.7121	152.047	159.774	117.388	126.133	0.850268	0.000160359	0.000343284	78.9208	138.836
Adck5	66.9609	35.5297	31.5075	158.129	99.8589	133.896	77.9056	1.46381	8.06252e-10	2.81463e-09	44.6661	117.447
Adcy1	42.7544	39.438	27.6066	6.08188	5.70622	3.66838	0	-3.20998	5.10111e-06	1.29142e-05	36.5997	3.86412
Adcy10	31.1227	20.9625	18.9045	6.08188	17.1187	23.8445	14.8392	-0.536665	0.282388	0.346063	23.6632	15.471
Adcy2	23.8922	12.4354	23.1055	12.1638	11.4124	25.6787	3.70979	-0.460996	0.387287	0.45418	19.811	13.2412
Adcy3	246.467	145.672	125.73	103.392	34.2373	73.3676	70.486	-1.25756	2.73035e-06	7.09959e-06	172.623	70.3707
Adcy4	182.021	135.723	105.625	94.2691	231.102	243.947	163.231	0.378508	0.102099	0.141083	141.123	183.137
Adcy5	1240.82	1071.58	603.144	79.0644	54.2091	119.222	63.0664	-3.61559	1.92972e-28	1.77576e-27	971.847	78.8906
Adcy6	1267.86	1031.43	789.489	547.369	707.571	838.225	582.437	-0.618398	2.4806e-05	5.83554e-05	1029.59	668.901
Adcy7	486.96	453.004	557.233	112.515	185.452	236.611	148.392	-1.52588	4.37112e-15	2.12283e-14	499.066	170.742
Adcy8	3.14371	3.19767	5.10122	6.08188	0	3.66838	0	-0.594324	0.680021	0.731578	3.8142	2.43757
Adcy9	426.915	364.89	370.889	1061.29	1509.3	1447.18	1016.48	1.69941	2.38446e-23	1.76596e-22	387.565	1258.56
Adcyap1r1	333.862	317.991	343.282	94.2691	71.3278	91.7096	70.486	-1.99888	3.51819e-27	3.08293e-26	331.712	81.9481
Add1	1698.86	1638.99	1624.89	887.954	684.746	763.024	760.507	-1.09068	5.91941e-17	3.19652e-16	1654.24	774.058
Add2	0.943112	0.710594	0	0	0	0	0	0.011387	0.996494	NA	0.551235	0
Add3	1005.67	891.795	1079.06	1909.71	1726.13	1766.33	1628.6	0.824863	3.47008e-11	1.33872e-10	992.175	1757.69
Adgb	43.6975	42.2803	36.6088	0	0	7.33676	0	-4.15654	7.55282e-06	1.87913e-05	40.8622	1.83419
Adgra1	0.314371	0.355297	0.300072	0	11.4124	3.66838	7.41958	4.11082	0.000736165	0.00145427	0.323246	5.6251
Adgra2	572.783	495.284	439.005	644.679	741.809	552.092	656.633	0.361198	0.0046077	0.00817114	502.357	648.803
Adgra3	172.589	105.879	126.03	51.696	68.4746	71.5335	77.9056	-1.00065	8.88733e-06	2.19178e-05	134.833	67.4024
Adgrb1	1.57185	0.710594	0.300072	0	2.85311	0	0	0.193272	0.898354	0.918869	0.86084	0.713278
Adgrb2	9.11675	2.13178	1.80043	3.04094	0	11.0051	7.41958	0.684999	0.342072	0.408445	4.34965	5.36642
Adgrb3	2.51496	0.710594	2.40058	0	0	0	0	-1.83565	0.332563	NA	1.87538	0
Adgrd1	353.353	252.971	330.079	103.392	65.6215	64.1967	129.843	-1.80453	1.78501e-11	7.00316e-11	312.134	90.7632
Adgre1	723.681	1322.42	1462.55	127.719	136.949	165.077	218.878	-2.7746	2.71958e-68	8.50422e-67	1169.55	162.156
Adgre4	83.9369	136.079	161.739	3.04094	11.4124	11.0051	18.5489	-3.49794	1.7175e-15	8.54502e-15	127.251	11.0019
Adgre5	1166	1019.35	766.384	167.252	202.571	183.419	189.199	-2.40878	8.31418e-48	1.5096e-46	983.91	185.61
Adgrf1	1.88622	2.13178	1.20029	848.422	673.334	649.304	575.017	8.64046	6.26924e-107	3.9354e-105	1.73943	686.519
Adgrf2	3.45808	5.32945	4.80115	12.1638	5.70622	9.17096	7.41958	0.985481	0.148513	0.197153	4.52956	8.61513
Adgrf3	1.25748	1.42119	0.300072	18.2456	5.70622	1.83419	7.41958	2.97588	0.00305547	0.00557117	0.992914	8.30141
Adgrf4	7.85926	2.84238	4.80115	27.3685	25.678	18.3419	14.8392	2.08109	9.9333e-05	0.000217836	5.1676	21.5569
Adgrf5	3149.05	4386.5	4074.08	2241.17	2191.19	3064.93	2155.39	-0.65476	1.82073e-06	4.82196e-06	3869.87	2413.17
Adgrg1	288.592	238.049	147.635	1356.26	1372.35	1414.16	1268.75	2.60534	1.75104e-70	5.79767e-69	224.759	1352.88
Adgrg2	104.057	106.944	182.144	63.8597	65.6215	78.8702	103.874	-0.716472	0.00938776	0.0158522	131.048	78.0564
Adgrg3	37.4101	24.8708	21.6052	3.04094	2.85311	9.17096	3.70979	-2.46368	6.49081e-05	0.000145595	27.962	4.6937
Adgrg5	7.54489	3.90827	3.00072	9.12282	11.4124	25.6787	14.8392	1.78653	0.000309453	0.000641787	4.81796	15.2633
Adgrg6	215.658	253.327	288.969	45.6141	31.3842	47.689	55.6468	-2.47723	5.6803e-27	4.93403e-26	252.651	45.0835
Adgrg7	3.14371	5.32945	2.40058	15.2047	17.1187	25.6787	40.8077	2.79054	1.32058e-06	3.54125e-06	3.62458	24.7024
Adgrl1	349.266	215.665	205.249	112.515	168.333	177.917	137.262	-0.745725	7.92707e-06	1.9679e-05	256.727	149.007
Adgrl2	752.603	803.327	714.771	1131.23	2048.53	1696.63	1517.3	1.07997	2.10138e-08	6.59798e-08	756.9	1598.42
Adgrl3	124.805	99.8385	117.028	42.5732	74.1809	86.207	111.294	-0.549519	0.0511511	0.075561	113.891	78.5637
Adgrl4	1043.4	1572.19	1557.37	462.223	462.204	451.211	448.885	-1.56377	5.80581e-43	9.01075e-42	1390.99	456.131
Adgrv1	2.82934	3.90827	3.90093	24.3275	8.55933	7.33676	3.70979	1.63342	0.0221942	0.0351337	3.54618	10.9834
Adh1	891.241	801.905	714.471	386.199	108.418	212.766	226.297	-1.80622	2.72126e-08	8.45623e-08	802.539	233.42
Adh4	0.628741	2.48708	0.900216	0	0	0	0	-1.24624	0.7446	NA	1.33868	0
Adh5	1001.58	1034.98	882.811	945.732	704.718	652.972	927.447	-0.28665	0.0468179	0.0697272	973.125	807.717
Adh6-ps1	9.43112	11.0142	7.5018	0	0	0	0	-4.21423	0.0026448	0.00486387	9.31571	0
Adh7	32.3802	35.5297	54.0129	36.4913	28.5311	29.3471	22.2587	-0.432623	0.215382	0.273616	40.6409	29.157
Adhfe1	1201.84	1519.96	1162.78	711.58	467.91	605.283	697.44	-1.06292	5.44441e-09	1.78409e-08	1294.86	620.553
Adi1	222.574	314.438	255.061	495.673	456.498	500.734	623.245	0.987044	1.78952e-11	7.01924e-11	264.024	519.037
Adig	665.522	371.641	341.482	538.246	550.65	608.951	634.374	0.385484	0.0690933	0.0991342	459.548	583.056
Adipoq	29272	27857.8	20799.2	2584.8	784.605	1863.54	1320.69	-3.97845	5.75515e-27	4.99391e-26	25976.3	1638.41
Adipor1	1543.25	1424.03	1178.08	3536.61	2647.69	2140.5	2852.83	1.00893	1.25041e-08	3.98686e-08	1381.79	2794.41
Adipor2	5982.79	5839.31	4572.2	4214.74	3101.33	3031.92	3016.06	-0.71268	2.0475e-05	4.86275e-05	5464.76	3341.01
Adk	977.378	1071.93	951.528	1423.16	1138.39	1021.64	1261.33	0.257072	0.0178308	0.0286835	1000.28	1211.13
Adm	46.8412	63.5982	52.5126	36.4913	42.7967	20.1761	33.3881	-0.748377	0.015229	0.0248269	54.3173	33.213
Adm2	0	0	0	3.04094	5.70622	1.83419	14.8392	6.56913	7.16094e-06	1.78506e-05	0	6.35513
Adnp	19.8053	15.9884	18.6045	0	5.70622	14.6735	0	-1.59653	0.0117895	0.0195692	18.1327	5.09494
Adnp2	196.796	194.703	181.844	182.456	310.989	216.435	237.427	0.303289	0.0743654	0.105933	191.114	236.827
Ado	375.358	437.371	457.61	741.989	564.916	568.599	600.986	0.549233	3.09306e-06	7.99961e-06	423.446	619.123
Adora1	355.867	446.608	237.357	51.696	28.5311	36.6838	25.9685	-3.26569	6.80008e-22	4.72536e-21	346.611	35.7199
Adora2a	34.5808	18.8307	17.4042	18.2456	34.2373	22.0103	18.5489	0.015532	0.964921	0.972408	23.6052	23.2606
Adora2b	16.6616	12.7907	18.9045	3.04094	0	1.83419	0	-3.60342	0.000437996	0.000891299	16.119	1.21878
Adora3	0.314371	1.42119	1.80043	3.04094	0	0	0	-0.0396421	0.98125	NA	1.17866	0.760235
Adpgk	251.811	288.856	284.468	231.111	185.452	194.424	218.878	-0.407171	0.00370185	0.00665773	275.045	207.466
Adprh	187.994	162.726	159.938	130.76	131.243	124.725	115.003	-0.445048	0.0123163	0.0203715	170.219	125.433
Adprhl1	2.20059	1.42119	0.600144	0	2.85311	0	3.70979	0.0975232	0.948115	0.959422	1.40731	1.64072
Adprhl2	90.8531	39.0827	30.3073	185.497	139.802	155.906	100.164	1.57425	6.69096e-11	2.52083e-10	53.4143	145.343
Adprm	138.637	181.557	180.943	109.474	102.712	104.549	81.6154	-0.712438	9.79621e-05	0.000215081	167.046	99.5875
Adra1a	429.745	444.121	270.065	48.655	14.2656	33.0154	40.8077	-3.49428	1.25587e-16	6.67295e-16	381.31	34.1859
Adra1b	2.51496	1.06589	1.50036	0	2.85311	0	0	-0.975158	0.505457	0.570076	1.69374	0.713278
Adra1d	32.3802	31.9767	23.4056	3.04094	2.85311	12.8393	11.1294	-1.92487	0.00105942	0.00205508	29.2542	7.46569
Adra2a	15.0898	16.3437	21.005	15.2047	14.2656	11.0051	0	-0.734883	0.215705	0.273968	17.4795	10.1188
Adra2b	5.65867	10.6589	5.40129	6.08188	8.55933	3.66838	0	-0.616152	0.440391	0.506776	7.23962	4.5774
Adra2c	3.14371	3.55297	1.50036	3.04094	5.70622	11.0051	0	0.811377	0.415844	0.482674	2.73234	4.93808
Adrb1	22.0059	24.1602	19.8047	91.2282	148.362	122.891	152.101	2.54544	1.61483e-19	1.00176e-18	21.9903	128.646
Adrb2	98.0836	92.0219	90.3216	437.895	542.091	443.874	389.528	2.27994	1.92268e-30	1.91655e-29	93.4757	453.347
Adrb3	1191.15	649.483	1111.17	103.392	102.712	209.098	137.262	-2.82033	4.22197e-33	4.68411e-32	983.933	138.116
Adrbk1	469.355	323.32	290.17	2265.5	1885.91	1781	2133.13	2.48262	9.74913e-118	7.25215e-116	360.948	2016.38
Adrbk2	377.245	423.869	318.676	577.779	833.108	915.261	745.668	1.03613	3.12997e-10	1.12095e-09	373.263	767.954
Adrm1	132.979	83.1395	64.8155	352.749	370.904	342.994	374.689	1.97492	8.03921e-50	1.53564e-48	93.6446	360.334
Adsl	362.469	258.656	243.658	498.714	430.82	396.185	463.724	0.624871	2.27732e-08	7.1305e-08	288.261	447.361
Adss	416.227	568.83	690.765	839.299	767.487	682.319	782.766	0.498911	8.32675e-05	0.000184377	558.608	767.968
Adssl1	60.9879	39.438	63.0151	33.4503	42.7967	33.0154	14.8392	-0.788502	0.0296681	0.0458727	54.4803	31.0254
Adtrp	35.2095	46.8992	27.6066	24.3275	2.85311	7.33676	14.8392	-1.62499	0.0271968	0.0423932	36.5718	12.3391
Aebp1	536.945	390.116	365.488	489.591	279.605	350.331	382.108	-0.187149	0.361668	0.42812	430.85	375.409
Aebp2	724.31	982.396	1081.16	629.474	610.566	647.469	556.468	-0.5598	8.43121e-09	2.72477e-08	929.288	610.994
Aen	88.3381	114.05	79.219	392.281	288.164	280.631	352.43	1.79855	1.45321e-17	8.104e-17	93.8691	328.377
Aes	710.163	405.039	280.267	2466.2	2262.52	2006.61	2077.48	2.30014	8.42881e-82	3.38878e-80	465.156	2203.2
AF251705	35.5239	45.478	42.0101	33.4503	31.3842	51.3574	51.9371	0.0542669	0.850331	0.879374	41.004	42.0322
AF357355	1.25748	1.42119	1.20029	0	0	0	0	-1.33412	0.48844	NA	1.29299	0
AF357359	6.60178	9.23772	8.40201	3.04094	2.85311	3.66838	0	-1.58041	0.0740655	0.105568	8.08051	2.39061
AF357399	2.20059	3.19767	4.50108	3.04094	5.70622	7.33676	7.41958	0.92441	0.185812	0.240249	3.29978	5.87588
AF357425	3.14371	2.13178	2.40058	3.04094	0	0	0	-1.69949	0.249358	0.311186	2.55869	0.760235
AF357426	2.20059	1.06589	0.900216	0	0	0	0	-1.34584	0.538683	NA	1.3889	0
AF529169	46.8412	3.55297	29.107	3.04094	2.85311	12.8393	3.70979	-2.05141	0.0181786	0.0291985	26.5004	5.61079
Afap1	1036.48	792.668	704.269	343.626	522.119	480.558	452.594	-0.908732	1.44714e-12	6.07114e-12	844.472	449.724
Afap1l1	420.942	406.104	336.381	179.415	168.333	218.269	200.329	-1.01258	2.38525e-09	8.03138e-09	387.809	191.587
Afap1l2	169.131	143.895	124.53	45.6141	34.2373	36.6838	48.2273	-1.85839	1.28435e-14	6.07832e-14	145.852	41.1906
Aff1	1140.54	1347.64	1170.88	1897.55	1081.33	1430.67	1227.94	0.216613	0.25705	0.319558	1219.69	1409.37
Aff2	51.2424	111.208	52.5126	3.04094	2.85311	11.0051	3.70979	-3.60472	4.76989e-08	1.45703e-07	71.6543	5.15225
Aff3	154.042	203.94	188.745	36.4913	25.678	53.1915	55.6468	-2.06257	5.68381e-17	3.07323e-16	182.242	42.7519
Aff4	3337.67	4734.69	4249.62	4610.06	4887.38	4247.99	4644.66	0.188879	0.0633447	0.0917043	4107.33	4597.52
Afg3l1	429.116	374.128	293.47	559.533	582.034	487.895	511.951	0.546	3.51593e-06	9.03102e-06	365.571	535.353
Afg3l2	611.136	623.546	553.633	738.948	699.012	647.469	649.213	0.192929	0.049098	0.0728148	596.105	683.661
Afmid	35.2095	36.9509	23.7057	15.2047	25.678	29.3471	29.6783	-0.354742	0.314792	0.380073	31.9554	24.977
Aftph	739.4	906.718	1076.36	2913.22	2453.67	2369.77	2607.98	1.53384	1.35991e-32	1.47675e-31	907.492	2586.16
Aga	356.496	373.062	286.869	215.907	285.311	245.782	333.881	-0.338371	0.0481052	0.0714554	338.809	270.22
Agap1	572.783	415.342	468.112	2092.17	1982.91	1751.65	1417.14	1.88982	1.24631e-39	1.72643e-38	485.412	1810.97
Agap2	18.2335	8.17183	8.10194	9.12282	37.0904	64.1967	33.3881	1.72733	6.72108e-05	0.00015044	11.5024	35.9495
Agap3	232.949	102.326	99.9239	562.574	539.238	442.04	393.238	1.81537	4.2015e-32	4.47048e-31	145.066	484.272
Agbl1	2.82934	1.77648	2.40058	0	0	0	0	-2.20523	0.487449	NA	2.33547	0
Agbl2	4.40119	5.68475	9.00216	0	2.85311	1.83419	0	-2.182	0.047823	0.0710924	6.3627	1.17183
Agbl3	112.545	112.984	134.132	51.696	34.2373	31.1812	48.2273	-1.5681	5.05804e-08	1.54114e-07	119.887	41.3355
Agbl5	109.087	84.2054	101.424	133.801	151.215	188.922	140.972	0.657453	0.000375917	0.000771291	98.2388	153.727
Ager	6.91615	4.26356	3.90093	9.12282	2.85311	22.0103	7.41958	1.1553	0.0524547	0.0772945	5.02688	10.3515
Agfg1	568.696	650.193	676.062	790.644	898.73	783.2	853.252	0.405654	0.000559275	0.00112094	631.651	831.456
Agfg2	269.73	318.701	198.348	124.679	105.565	102.715	100.164	-1.28182	1.71067e-08	5.40638e-08	262.26	108.281
Aggf1	374.415	453.359	438.105	380.117	370.904	394.351	359.85	-0.150778	0.227941	0.287691	421.96	376.306
Agk	159.7	180.491	188.145	82.1054	71.3278	104.549	89.035	-0.985935	3.78554e-07	1.06627e-06	176.112	86.7542
Agl	889.669	986.66	901.116	404.445	453.644	486.061	445.175	-1.03756	2.75846e-15	1.35998e-14	925.815	447.331
Agmat	0.314371	0.710594	0.600144	0	0	5.50257	0	1.30085	0.520334	NA	0.541703	1.37564
Agmo	589.445	836.724	874.71	215.907	139.802	172.414	126.133	-2.18009	1.18583e-26	1.01336e-25	766.96	163.564
Ago1	656.72	611.821	608.246	574.738	833.108	674.982	671.472	0.136002	0.300111	0.364528	625.596	688.575
Ago2	886.525	898.191	727.074	547.369	679.04	847.396	678.892	-0.282443	0.0553265	0.0811327	837.263	688.174
Ago3	491.047	647.351	683.864	419.65	747.515	707.998	530.5	0.0194295	0.920041	0.93719	607.421	601.416
Ago4	173.533	207.849	258.362	176.374	231.102	264.124	140.972	-0.0201386	0.922483	0.939226	213.248	203.143
Agpat1	234.835	117.959	96.3231	2244.21	2487.91	2155.17	2092.32	3.97309	1.35314e-219	4.15438e-217	149.705	2244.91
Agpat2	2133.32	1116.7	568.036	462.223	259.633	401.688	307.913	-1.7045	3.35301e-06	8.63092e-06	1272.68	357.864
Agpat3	831.51	539.341	421.901	364.913	245.367	240.279	230.007	-1.08015	2.96509e-05	6.91076e-05	597.584	270.142
Agpat4	63.5029	52.584	45.911	63.8597	48.5029	58.6941	63.0664	0.115469	0.695214	0.744695	53.9993	58.5308
Agpat5	344.236	491.02	411.098	377.077	348.079	304.476	411.787	-0.203667	0.153703	0.203276	415.452	360.355
Agpat6	1300.24	1196.64	1095.26	12963.5	7754.75	6854.37	8328.48	2.87188	4.47335e-56	1.02771e-54	1197.38	8975.28
Agpat9	1503.63	1398.8	1155.58	194.62	62.7684	139.399	100.164	-3.40603	5.53264e-22	3.8701e-21	1352.67	124.238
Agps	1319.41	2853.03	3073.04	2490.53	3640.57	3152.97	3383.33	0.522034	0.00597565	0.0104155	2415.16	3166.85
Agr2	0.628741	1.77648	0.600144	0	2.85311	1.83419	3.70979	1.17403	0.282842	0.346544	1.00179	2.09927
Agrn	767.693	377.325	436.004	544.328	987.176	981.292	730.829	0.654801	5.0283e-07	1.40043e-06	527.008	810.906
Agrp	7.54489	2.48708	3.60086	3.04094	0	3.66838	0	-1.14092	0.290526	0.354902	4.54428	1.67733
Agt	143.353	80.6524	98.4236	900.118	767.487	689.656	656.633	2.79151	3.5395e-46	6.02499e-45	107.476	753.473
Agtpbp1	833.711	1063.4	981.835	559.533	661.922	599.781	597.276	-0.64998	6.79399e-10	2.38461e-09	959.65	604.628
Agtr1a	399.879	158.107	430.603	66.9007	37.0904	60.5283	40.8077	-2.67364	2.34595e-09	7.90219e-09	329.53	51.3318
Agtr2	8.48801	5.32945	42.0101	0	2.85311	0	0	-4.20741	0.00294444	0.00538227	18.6092	0.713278
Agtrap	288.907	279.974	369.088	921.405	890.17	790.536	827.283	1.46869	1.56266e-21	1.06486e-20	312.656	857.349
Agxt2	4.71556	2.13178	4.20101	0	0	5.50257	7.41958	-0.179612	0.843473	0.873528	3.68278	3.23054
Ahctf1	1296.78	1459.2	1801.03	2067.84	2148.39	2461.48	2233.29	0.573137	8.09448e-07	2.21063e-06	1519	2227.75
Ahcy	100.599	58.624	76.5183	118.597	111.271	66.0309	85.3252	0.236606	0.332744	0.398604	78.5803	95.306
Ahcyl1	1272.89	1748.06	1864.95	1575.21	1634.83	1531.55	1595.21	-0.0082151	0.922149	0.938998	1628.63	1584.2
Ahcyl2	3120.76	4369.8	3523.74	2542.23	2562.09	2169.85	2018.13	-0.636737	4.08177e-05	9.3635e-05	3671.43	2323.07
Ahdc1	130.778	40.5039	41.4099	401.404	356.639	416.361	293.073	2.56026	2.22925e-55	4.99246e-54	70.8973	366.869
Ahi1	176.048	153.488	189.045	12.1638	25.678	44.0206	18.5489	-2.69184	2.96306e-17	1.62554e-16	172.86	25.1028
Ahnak	82154.5	115058	115219	6531.94	7603.54	10898.8	9033.34	-3.58818	3.23569e-192	6.66315e-190	104144	8516.89
Ahr	397.679	308.753	465.111	212.866	179.746	271.46	252.266	-0.759658	3.56528e-05	8.23913e-05	390.514	229.084
Ahrr	7.23052	13.8566	16.804	0	2.85311	11.0051	0	-1.61173	0.0567682	0.0830524	12.6304	3.46456
Ahsa1	552.035	574.871	528.727	863.627	716.131	577.77	719.699	0.361729	0.00219839	0.00408159	551.877	719.307
Ahsa2	187.994	230.943	236.157	288.889	273.899	231.108	281.944	0.305274	0.0421809	0.0633125	218.364	268.96
Ahsg	4.71556	6.75064	1.20029	0	0	0	0	-3.03472	0.160368	0.211066	4.22216	0
AI118078	4.08682	3.55297	2.70065	3.04094	25.678	11.0051	11.1294	1.8801	0.0170201	0.0275079	3.44681	12.7134
AI182371	5.97304	6.39535	11.7028	3.04094	14.2656	14.6735	0	0.166473	0.832469	0.863669	8.02373	7.995
AI197445	2.20059	3.55297	5.70137	0	2.85311	3.66838	0	-0.932612	0.389711	0.456546	3.81831	1.63037
AI314180	2223.86	3064.79	2909.8	2076.96	1880.2	2094.65	2029.26	-0.410507	5.78904e-07	1.60278e-06	2732.82	2020.27
AI314278	5.97304	8.52713	5.70137	0	0	0	0	-3.715	0.0151756	0.0247494	6.73384	0
AI317395	8.17363	4.61886	5.70137	0	2.85311	7.33676	0	-1.05203	0.311996	0.376984	6.16462	2.54747
AI413582	45.8981	33.0426	23.7057	45.6141	31.3842	66.0309	81.6154	0.718176	0.0315325	0.0485253	34.2155	56.1611
AI414108	19.1766	14.2119	22.2053	12.1638	22.8249	12.8393	11.1294	-0.336343	0.450211	0.516387	18.5313	14.7393
AI427809	11.9461	10.6589	14.7035	0	0	5.50257	7.41958	-2.08589	0.0247343	0.0388235	12.4362	3.23054
AI429214	35.8382	53.2945	40.8098	30.4094	22.8249	33.0154	29.6783	-0.548321	0.103009	0.142167	43.3142	28.982
AI450353	3.14371	3.90827	6.30151	3.04094	2.85311	18.3419	3.70979	0.913248	0.212944	0.270989	4.45116	6.98644
AI463170	10.0599	4.97416	11.7028	325.381	191.158	174.248	267.105	4.70291	1.16313e-46	2.02064e-45	8.91227	239.473
AI464131	591.645	701.356	474.714	358.831	156.921	139.399	155.811	-1.57506	2.97888e-08	9.21945e-08	589.238	202.74
AI467606	53.443	39.0827	60.6145	12.1638	17.1187	22.0103	18.5489	-1.53246	0.000150157	0.000322138	51.0467	17.4604
AI504432	37.0957	40.8592	42.6102	3.04094	5.70622	12.8393	14.8392	-2.12766	9.32612e-06	2.29464e-05	40.1884	9.10641
AI506816	33.952	17.7648	22.2053	12.1638	22.8249	42.1864	33.3881	0.248935	0.534085	0.59802	24.6407	27.6408
AI507597	0.314371	0.355297	0.300072	3.04094	0	5.50257	7.41958	3.65293	0.00406641	0.00726448	0.323246	3.99077
AI597479	388.562	523.708	514.623	380.117	325.255	306.31	315.332	-0.500495	4.31137e-05	9.86475e-05	475.631	331.754
AI606473	19.491	52.2287	34.5083	0	0	5.50257	0	-4.13692	9.35697e-05	0.000206	35.4093	1.37564
AI607873	308.398	553.197	633.752	215.907	105.565	177.917	140.972	-1.53208	1.13698e-08	3.64102e-08	498.449	160.09
AI661453	36.7814	12.0801	28.5068	288.889	436.526	427.367	456.304	3.97992	2.43325e-47	4.33416e-46	25.7894	402.271
AI662270	99.9698	118.314	191.146	42.5732	22.8249	23.8445	22.2587	-2.32476	3.52102e-05	8.148e-05	136.477	27.8753
AI837181	62.8741	20.6072	16.504	76.0235	94.1526	78.8702	103.874	1.58552	4.67241e-11	1.78261e-10	33.3284	88.2301
AI839979	12.8892	10.6589	13.8033	3.04094	8.55933	1.83419	0	-1.89665	0.0210688	0.0334651	12.4505	3.35862
AI846148	84.8801	58.9793	54.6131	218.948	259.633	295.305	281.944	2.00923	6.38388e-40	8.90159e-39	66.1575	263.957
AI847159	0.943112	1.06589	0.600144	0	0	0	0	-0.796574	0.742207	NA	0.869715	0
AI854703	10.3742	9.23772	7.20173	6.08188	0	0	0	-2.77221	0.0720333	0.102906	8.93789	1.52047
AI987944	253.383	343.572	386.193	197.661	225.396	183.419	270.815	-0.563263	0.000536353	0.00107825	327.716	219.323
Aicda	1.25748	0.710594	0.900216	0	0	0	0	-1.00047	0.744965	NA	0.956097	0
Aida	649.49	969.25	1022.04	194.62	202.571	214.6	289.364	-1.93408	4.65639e-31	4.76243e-30	880.262	225.289
Aif1	72.934	99.4832	108.626	33.4503	62.7684	44.0206	14.8392	-1.19679	0.00057134	0.0011439	93.681	38.7696
Aif1l	216.287	122.222	195.947	24.3275	5.70622	20.1761	29.6783	-3.18381	9.61935e-16	4.83286e-15	178.152	19.972
Aifm1	327.26	456.912	383.792	437.895	473.616	436.537	404.367	0.194972	0.155807	0.205753	389.321	438.104
Aifm2	1608.95	1707.91	1030.15	346.667	194.011	223.771	241.136	-2.52859	2.58442e-23	1.91071e-22	1449	251.397
Aifm3	7.23052	2.13178	3.30079	36.4913	59.9153	55.0257	40.8077	3.63022	2.05351e-20	1.32907e-19	4.22103	48.06
Aig1	56.5867	52.2287	42.3101	377.077	333.814	249.45	370.979	2.69997	1.46119e-54	3.18781e-53	50.3752	332.83
Aim1	610.508	501.324	656.257	1791.11	2339.55	1848.86	1587.79	1.67671	2.38665e-19	1.46709e-18	589.363	1891.83
Aim1l	3.77245	1.42119	3.60086	33.4503	51.356	38.518	44.5175	3.81198	8.60235e-19	5.11837e-18	2.9315	41.9605
Aim2	43.0688	60.4005	96.9232	18.2456	19.9718	27.5129	25.9685	-1.44007	4.233e-05	9.68674e-05	66.7975	22.9247
Aimp1	352.095	403.262	364.887	669.007	553.503	409.025	560.178	0.539992	0.000418166	0.00085331	373.415	547.928
Aimp2	104.685	90.6007	67.5162	209.825	148.362	124.725	248.556	1.02518	1.40139e-06	3.74964e-06	87.6008	182.867
Aip	147.125	110.497	78.9189	304.094	196.865	174.248	207.748	0.979559	2.78202e-06	7.22949e-06	112.181	220.739
Airn	167.874	169.832	222.953	33.4503	105.565	194.424	107.584	-0.78322	0.0152714	0.0248796	186.886	110.256
Ajuba	213.143	178.004	186.045	94.2691	94.1526	113.72	118.713	-0.879151	2.68636e-06	6.99489e-06	192.397	105.214
AK010878	30.1796	31.6214	44.7107	66.9007	45.6498	45.8548	25.9685	0.413901	0.162711	0.213749	35.5039	46.0934
Ak1	225.404	173.74	109.826	18.2456	22.8249	25.6787	22.2587	-2.90492	3.89171e-18	2.23598e-17	169.657	22.252
Ak2	1461.51	1556.56	975.834	1830.65	1837.4	1463.68	1713.92	0.350326	0.0116225	0.019309	1331.3	1711.41
Ak3	2671.84	3921.77	2829.38	4263.4	2816.02	2687.09	3134.77	0.0396207	0.814451	0.848625	3140.99	3225.32
Ak4	31.1227	16.3437	37.8091	36.4913	34.2373	33.0154	40.8077	0.326508	0.384839	0.451905	28.4251	36.1379
Ak5	20.1197	22.0284	17.4042	12.1638	8.55933	12.8393	7.41958	-0.922877	0.0728682	0.10402	19.8508	10.2455
Ak6	79.8501	87.0478	76.2183	252.398	168.333	143.067	192.909	1.1923	8.13829e-12	3.25843e-11	81.0387	189.177
Ak7	0.628741	1.06589	1.20029	3.04094	5.70622	7.33676	3.70979	2.49984	0.00858306	0.0145985	0.964973	4.94843
Ak8	7.85926	5.32945	8.10194	9.12282	0	1.83419	0	-1.35147	0.264974	0.328104	7.09689	2.73925
Akap1	558.008	460.11	419.801	1882.34	2088.48	2175.35	1658.28	2.02951	2.07492e-90	9.81432e-89	479.306	1951.11
Akap10	504.25	604.36	701.568	574.738	716.131	608.951	549.049	0.0477832	0.714266	0.761337	603.393	612.217
Akap11	1340.79	1928.91	1939.66	1052.17	1044.24	1146.37	968.255	-0.678761	6.28394e-12	2.53187e-11	1736.45	1052.76
Akap12	2095.59	2135.33	1895.55	273.685	368.051	502.568	404.367	-2.39824	1.65256e-48	3.06313e-47	2042.16	387.168
Akap13	2334.2	2860.14	2567.72	580.819	602.006	768.526	571.308	-2.01893	1.30874e-59	3.32823e-58	2587.35	630.665
Akap14	0	1.06589	2.40058	6.08188	0	1.83419	0	1.88361	0.195793	0.251726	1.15549	1.97902
Akap17b	140.838	232.72	195.947	94.2691	159.774	119.222	170.65	-0.45539	0.0317523	0.0488404	189.835	135.979
Akap2	4.71556	2.84238	3.30079	0	0	1.83419	0	-2.09203	0.123257	0.166847	3.61958	0.458548
Akap5	39.2963	45.478	33.308	3.04094	25.678	31.1812	29.6783	-0.792797	0.0587719	0.0857014	39.3608	22.3946
Akap6	52.1855	50.4522	71.4171	24.3275	25.678	29.3471	25.9685	-1.13143	0.000575093	0.00115114	58.0183	26.3303
Akap7	560.837	642.022	771.485	115.556	88.4464	89.8754	144.682	-2.60127	1.13519e-46	1.97414e-45	658.115	109.64
Akap8	690.358	759.625	886.412	894.036	873.052	994.132	860.671	0.236438	0.0241226	0.0379409	778.798	905.473
Akap8l	286.392	258.656	265.264	246.316	339.52	335.657	281.944	0.163053	0.190605	0.245654	270.104	300.859
Akap9	1989.34	2454.75	2411.98	2113.45	3275.37	3426.27	2574.59	0.32937	0.0326022	0.0500565	2285.35	2847.42
Akip1	123.233	133.947	127.531	431.813	168.333	177.917	178.07	0.892946	0.0174322	0.0281146	128.237	239.033
Akirin1	602.648	1182.43	794.29	483.509	322.401	425.532	482.273	-0.961365	6.50893e-07	1.79269e-06	859.789	428.429
Akirin2	400.194	543.249	550.932	264.562	228.249	231.108	259.685	-0.99894	9.85517e-14	4.4389e-13	498.125	245.901
Akna	139.266	98.7726	74.1178	60.8188	99.8589	132.062	126.133	0.0257712	0.906844	0.926206	104.052	104.718
Aknad1	2.82934	5.68475	8.40201	0	5.70622	3.66838	0	-0.982182	0.326292	0.391684	5.6387	2.34365
Akr1a1	3816.46	3584.95	3155.26	2533.1	2188.34	1781	2411.36	-0.669915	8.95531e-08	2.67031e-07	3518.89	2228.45
Akr1b10	237.35	212.823	181.543	401.404	262.486	273.294	248.556	0.480757	0.000862752	0.00169263	210.572	296.435
Akr1b8	295.823	314.793	246.659	127.719	25.678	38.518	66.7762	-2.22582	5.56886e-09	1.82346e-08	285.758	64.6729
Akr1c12	6.91615	14.2119	26.7064	0	2.85311	1.83419	0	-3.39348	0.0119312	0.0197946	15.9448	1.17183
Akr1c13	101.856	167.7	156.337	21.2866	2.85311	11.0051	14.8392	-3.49232	1.83776e-16	9.63737e-16	141.965	12.496
Akr1c14	577.813	624.612	714.771	149.006	34.2373	82.5386	77.9056	-2.89699	8.76775e-19	5.21127e-18	639.065	85.9219
Akr1c18	162.53	78.1653	215.752	0	8.55933	7.33676	44.5175	-3.43628	1.72428e-07	5.01053e-07	152.149	15.1034
Akr1c19	11.3173	9.59302	20.705	3.04094	0	0	0	-4.10114	0.0012518	0.00240668	13.8718	0.760235
Akr1c21	6.91615	12.0801	9.00216	3.04094	0	7.33676	0	-1.70701	0.0846626	0.119105	9.3328	2.59443
Akr1cl	140.524	142.474	317.176	0	2.85311	7.33676	0	-5.99123	3.20399e-12	1.31349e-11	200.058	2.54747
Akr1e1	373.787	492.442	448.007	218.948	211.13	220.103	267.105	-0.925655	5.11913e-11	1.94601e-10	438.079	229.321
Akr7a5	97.7692	41.2145	33.6081	325.381	322.401	264.124	259.685	2.46069	2.46264e-53	5.22414e-52	57.5306	292.898
Akt1	689.1	308.042	300.372	7155.33	6470.85	5517.25	7382.48	3.99811	1.51967e-276	6.57976e-274	432.505	6631.48
Akt1s1	101.542	70.3488	45.0108	367.954	353.786	306.31	274.524	2.20555	4.89031e-35	5.78681e-34	72.3004	325.643
Akt2	1486.03	980.975	627.45	729.825	590.594	498.9	526.79	-0.767598	0.000291198	0.000605862	1031.48	586.527
Akt3	547.319	686.789	836.6	252.398	208.277	212.766	196.619	-1.62998	3.31287e-31	3.40896e-30	690.236	217.515
Aktip	578.442	845.962	771.785	717.662	599.153	531.915	634.374	-0.208522	0.191354	0.246469	732.063	620.776
Alad	231.062	110.853	89.4214	319.299	259.633	276.963	263.395	1.04538	5.01288e-15	2.42723e-14	143.779	279.822
Alas1	1370.66	1297.9	722.573	1106.9	487.882	506.237	537.92	-0.790738	0.00596957	0.010407	1130.38	659.735
Alas2	254.955	211.402	196.247	79.0644	196.865	201.761	244.846	-0.290956	0.368617	0.435263	220.868	180.634
Alb	337.32	292.765	144.935	9.12282	5.70622	5.50257	0	-5.59862	6.64077e-19	3.98069e-18	258.34	5.0829
Alcam	2482.9	3611.95	2735.76	179.415	102.712	135.73	129.843	-4.4112	1.30955e-126	1.11682e-124	2943.53	136.925
Aldh16a1	82.3651	26.292	22.5054	194.62	231.102	179.751	133.552	2.28863	4.33685e-30	4.26512e-29	43.7208	184.756
Aldh18a1	248.353	144.251	178.243	4430.65	5734.75	5275.13	4733.69	4.73613	3.62131e-88	1.6438e-86	190.282	5043.56
Aldh1a1	1954.76	3279.39	2907.7	231.111	39.9435	80.7044	129.843	-4.52273	3.8843e-40	5.46586e-39	2713.95	120.4
Aldh1a2	38.3532	46.1886	69.9167	0	0	7.33676	11.1294	-3.50999	1.19387e-07	3.51949e-07	51.4862	4.61653
Aldh1a3	440.119	293.475	925.722	51.696	99.8589	33.0154	218.878	-2.36376	0.00125609	0.0024141	553.105	100.862
Aldh1a7	1849.44	2102.29	1018.14	121.638	116.978	89.8754	115.003	-3.91069	3.65137e-39	5.00057e-38	1656.63	110.873
Aldh1b1	5.97304	5.32945	3.60086	3.04094	5.70622	7.33676	7.41958	0.253916	0.71616	0.762826	4.96779	5.87588
Aldh1l1	2271.96	1426.87	813.495	1082.57	901.583	766.692	660.343	-0.766003	0.000538062	0.00108112	1504.11	852.798
Aldh1l2	66.3322	54.7157	45.6109	717.662	2037.12	2127.66	1554.4	4.85898	6.29035e-51	1.24816e-49	55.553	1609.21
Aldh2	2021.4	1216.18	946.727	2639.54	2034.27	1810.35	1565.53	0.556747	0.000136543	0.000294503	1394.77	2012.42
Aldh3a1	5.02993	0.710594	9.00216	0	0	0	0	-3.16902	0.101366	0.140128	4.91423	0
Aldh3a2	724.939	897.836	827.598	906.2	1035.68	900.588	897.769	0.20366	0.102749	0.141842	816.791	935.059
Aldh3b1	100.913	87.4031	59.4142	39.5322	28.5311	33.0154	33.3881	-1.29297	8.94684e-06	2.20389e-05	82.5767	33.6167
Aldh3b2	94.9399	99.8385	42.3101	45.6141	2.85311	11.0051	3.70979	-2.3882	4.11478e-05	9.43283e-05	79.0295	15.7955
Aldh3b3	4.40119	2.84238	0.600144	0	0	0	0	-2.19995	0.479405	NA	2.61457	0
Aldh4a1	458.038	273.223	201.948	532.164	342.373	405.356	393.238	0.467873	0.0122779	0.0203159	311.07	418.283
Aldh5a1	221.946	216.731	210.05	121.638	85.5933	77.036	74.1958	-1.28373	2.28105e-12	9.44063e-12	216.242	89.6157
Aldh6a1	5037.16	6579.75	6036.25	2961.88	1971.5	1865.37	2118.29	-1.40403	4.53995e-14	2.09001e-13	5884.38	2229.26
Aldh7a1	766.435	535.433	518.524	1319.77	1500.74	1172.05	1313.27	1.1273	6.1978e-18	3.52377e-17	606.797	1326.45
Aldh9a1	564.61	548.579	522.725	866.668	821.696	766.692	845.832	0.592247	9.0826e-09	2.92968e-08	545.304	825.222
Aldoa	9339.64	6803.23	3326	4497.55	3081.36	3285.04	3197.84	-0.840548	5.7096e-05	0.000128876	6489.62	3515.45
Aldob	0.943112	1.42119	2.40058	0	0	1.83419	0	-0.791771	0.620541	NA	1.58829	0.458548
Aldoc	131.407	52.2287	41.1098	9785.74	11169.9	7965.89	9860.62	7.13745	4.71083e-234	1.59094e-231	74.9151	9695.55
Alg1	108.772	81.363	67.8162	316.258	293.87	267.792	263.395	1.73593	1.91356e-35	2.29491e-34	85.9838	285.329
Alg10b	547.319	751.453	783.488	662.925	479.322	442.04	460.014	-0.423535	0.00236147	0.0043666	694.087	511.075
Alg11	309.341	466.15	450.108	1021.76	1135.54	814.381	1012.77	1.31574	6.36571e-21	4.21866e-20	408.533	996.112
Alg12	78.5926	56.4922	57.9139	88.1872	105.565	102.715	126.133	0.703654	0.000176884	0.000376939	64.3329	105.65
Alg13	134.551	172.674	188.145	118.597	99.8589	113.72	103.874	-0.561687	0.00147149	0.00279877	165.123	109.012
Alg14	154.356	195.413	165.34	301.053	265.339	220.103	267.105	0.608392	2.90982e-06	7.54417e-06	171.703	263.4
Alg2	257.155	309.464	267.364	218.948	233.955	231.108	293.073	-0.188138	0.245795	0.307374	277.994	244.271
Alg3	36.1526	34.8191	29.407	139.883	131.243	137.564	159.521	2.0803	2.98023e-26	2.5012e-25	33.4596	142.053
Alg5	286.077	439.502	347.183	623.393	599.153	592.444	693.731	0.832798	7.73381e-11	2.90207e-10	357.588	627.18
Alg6	126.377	160.239	205.549	133.801	136.949	174.248	148.392	-0.0920797	0.664067	0.717751	164.055	148.348
Alg8	74.5058	91.6666	75.318	97.3101	102.712	108.217	100.164	0.365418	0.0484174	0.0718875	80.4968	102.101
Alg9	273.188	242.313	207.95	443.977	487.882	311.812	408.077	0.753353	1.29316e-07	3.80093e-07	241.15	412.937
Alk	10.6886	2.13178	1.80043	0	0	0	0	-2.8171	0.0388536	0.058736	4.8736	0
Alkbh1	128.892	128.262	156.938	109.474	168.333	170.58	181.78	0.195883	0.279507	0.343056	138.031	157.542
Alkbh2	21.3772	7.10594	9.6023	66.9007	57.0622	36.6838	48.2273	2.10867	5.8508e-11	2.2117e-10	12.6951	52.2185
Alkbh3	259.041	246.576	174.642	389.24	339.52	350.331	378.399	0.6816	2.16808e-05	5.13323e-05	226.753	364.372
Alkbh4	36.1526	29.1344	33.9081	45.6141	88.4464	89.8754	70.486	1.17123	6.37797e-06	1.59861e-05	33.065	73.6055
Alkbh5	1033.02	1474.84	1208.09	1748.54	1637.69	1412.33	1487.63	0.356886	0.00297192	0.00542939	1238.65	1571.54
Alkbh6	59.7304	37.6615	30.9074	100.351	85.5933	99.0463	129.843	1.29238	5.97657e-09	1.95355e-08	42.7664	103.708
Alkbh7	39.6107	20.9625	21.9052	66.9007	45.6498	55.0257	74.1958	1.14385	6.13933e-05	0.000138114	27.4928	60.443
Alkbh8	188.937	237.338	237.357	127.719	202.571	212.766	218.878	-0.194376	0.338221	0.404447	221.211	190.484
Alms1	286.392	250.84	435.404	167.252	265.339	258.621	211.458	-0.502973	0.0675458	0.0971283	324.212	225.667
Alms1-ps2	0.628741	0	0.300072	0	5.70622	0	0	2.42654	0.12948	0.174437	0.309604	1.42656
Alox12	27.3502	20.9625	26.1063	27.3685	25.678	29.3471	29.6783	0.172539	0.620758	0.678718	24.8063	28.018
Alox12e	15.0898	4.26356	11.1027	9.12282	25.678	0	14.8392	0.315297	0.695913	0.745302	10.152	12.41
Alox15	2.51496	6.04005	5.40129	3.04094	8.55933	1.83419	22.2587	0.876481	0.197411	0.253613	4.6521	8.9233
Alox5	68.5328	51.8734	70.2168	24.3275	11.4124	7.33676	14.8392	-2.20614	3.44189e-07	9.72715e-07	63.541	14.479
Alox5ap	145.239	126.841	220.853	27.3685	17.1187	36.6838	22.2587	-2.59922	1.67687e-14	7.89836e-14	164.311	25.8574
Alox8	2.20059	3.55297	1.20029	0	0	0	0	-2.17036	0.152956	0.202416	2.31795	0
Aloxe3	0	1.42119	0.300072	6.08188	11.4124	9.17096	0	4.08703	0.000984611	0.00191855	0.573753	6.66632
Alpk1	158.128	197.19	221.753	54.7369	62.7684	77.036	92.7447	-1.40365	7.97594e-12	3.1953e-11	192.357	71.8215
Alpk2	5.65867	7.10594	3.90093	0	0	3.66838	0	-2.25623	0.110621	0.151447	5.55518	0.917096
Alpk3	14.1467	5.32945	9.90237	9.12282	8.55933	11.0051	11.1294	0.0237378	0.97865	0.983367	9.79283	9.95417
Alpl	106.886	99.1279	85.2204	273.685	256.78	198.093	166.941	1.20309	3.94732e-11	1.51487e-10	97.0781	223.874
Alppl2	0	0	0	0	2.85311	3.66838	0	5.16547	0.0154057	0.025081	0	1.63037
Als2	445.149	480.717	442.906	176.374	228.249	223.771	163.231	-1.1843	2.48659e-15	1.2281e-14	456.257	197.906
Als2cl	233.263	179.78	181.543	228.07	268.192	304.476	200.329	0.340706	0.035535	0.0541235	198.196	250.267
Als2cr12	176.048	310.885	194.447	3.04094	0	5.50257	7.41958	-5.78802	3.66128e-18	2.10717e-17	227.126	3.99077
Alx3	1.25748	0	1.80043	0	0	0	0	-0.883028	0.769714	NA	1.0193	0
Alx4	38.9819	25.5814	53.1127	9.12282	19.9718	23.8445	14.8392	-1.17367	0.00556907	0.0097612	39.2254	16.9446
Alyref	308.083	245.866	271.565	273.685	202.571	161.409	230.007	-0.387379	0.0251255	0.0393863	275.171	216.918
Alyref2	18.5479	16.3437	11.7028	39.5322	31.3842	33.0154	37.0979	1.17607	0.00046817	0.000948814	15.5314	35.2574
Amacr	109.401	98.4173	83.1199	155.088	105.565	128.393	133.552	0.423686	0.0262051	0.0409798	96.9794	130.65
Ambra1	487.589	431.331	418	386.199	470.763	447.543	456.304	-0.0217019	0.838222	0.868889	445.64	440.202
Amdhd2	62.8741	24.1602	24.3058	294.971	299.577	341.16	348.72	3.25386	4.37598e-38	5.79552e-37	37.1134	321.107
Amelx	9.43112	14.2119	17.4042	0	0	1.83419	3.70979	-3.30149	0.00171814	0.00323982	13.6824	1.386
Amer1	640.373	907.429	760.382	623.393	579.181	693.324	478.563	-0.345567	0.0372174	0.0564952	769.394	593.615
Amer2	1.25748	0.355297	0.900216	0	0	0	0	-0.647196	0.736013	NA	0.837665	0
Amfr	1865.47	1877.03	1695.41	1931	1623.42	1538.89	1610.05	-0.119969	0.205605	0.26276	1812.64	1675.84
Amh	0.943112	0.355297	0.600144	0	2.85311	3.66838	0	1.54321	0.270658	0.333966	0.632851	1.63037
Amhr2	21.0628	8.52713	11.7028	0	2.85311	1.83419	0	-3.32862	0.00248813	0.00458876	13.7643	1.17183
Amica1	12.2605	20.6072	16.804	9.12282	0	3.66838	11.1294	-1.53891	0.0290349	0.0449719	16.5572	5.98014
Amigo1	171.018	147.093	163.839	307.135	262.486	238.445	244.846	0.704492	1.92514e-06	5.08891e-06	160.65	263.228
Amigo2	98.0836	132.17	108.326	358.831	442.232	264.124	467.434	1.7874	3.81466e-12	1.55816e-11	112.86	383.155
Amigo3	32.6945	25.5814	21.6052	57.7779	116.978	139.399	100.164	1.98153	2.82355e-10	1.01595e-09	26.627	103.58
Ammecr1	111.602	115.827	129.031	145.965	368.051	331.989	255.975	1.228	9.89079e-06	2.42439e-05	118.82	275.495
Ammecr1l	617.738	762.112	761.582	571.697	753.221	863.904	912.608	0.134137	0.331248	0.397037	713.811	775.358
Amn	0.628741	0	0.300072	0	2.85311	3.66838	0	2.62905	0.119319	0.162093	0.309604	1.63037
Amn1	93.9968	134.302	144.635	57.7779	77.034	67.8651	70.486	-0.818068	0.000400453	0.000819046	124.311	68.2907
Amot	260.613	262.92	369.989	510.878	824.549	763.024	630.664	1.20746	1.34284e-07	3.94146e-07	297.841	682.279
Amotl1	4765.54	4396.44	4386.75	2235.09	2433.7	2239.55	2277.81	-0.979602	1.85446e-37	2.39224e-36	4516.25	2296.54
Amotl2	2004.43	1827.29	2184.82	158.129	194.011	238.445	196.619	-3.3501	1.20033e-54	2.62209e-53	2005.51	196.801
Ampd1	47.47	24.1602	53.7129	0	8.55933	14.6735	3.70979	-2.53484	0.00025646	0.000536893	41.781	6.73566
Ampd2	187.05	85.6266	111.027	130.76	216.836	183.419	196.619	0.542799	0.0129445	0.0213479	127.901	181.909
Ampd3	222.574	324.386	234.056	51.696	48.5029	53.1915	70.486	-2.22616	1.1604e-17	6.51416e-17	260.339	55.9691
Amph	2.51496	2.13178	2.70065	0	0	1.83419	7.41958	-0.24939	0.820162	0.853733	2.44913	2.31344
Amt	92.7393	51.1628	72.9175	602.106	573.475	462.216	567.598	2.92165	6.54624e-69	2.08566e-67	72.2732	551.349
Amy1	3505.55	4360.92	4925.98	279.766	102.712	229.274	96.4545	-4.54886	5.84701e-37	7.36261e-36	4264.15	177.052
Amz1	21.6916	10.3036	6.60158	18.2456	34.2373	34.8496	18.5489	1.21585	0.0014082	0.00268505	12.8656	26.4704
Amz2	447.349	508.075	481.615	355.79	325.255	331.989	400.657	-0.442451	0.000278045	0.000579924	479.013	353.423
Anapc1	2231.09	2471.09	2640.93	1313.69	1375.2	1386.65	1279.88	-0.859882	8.14435e-21	5.37209e-20	2447.7	1338.85
Anapc10	153.413	232.009	206.449	97.3101	82.7402	80.7044	103.874	-1.1007	9.35969e-09	3.01503e-08	197.29	91.1572
Anapc11	112.23	82.0736	70.2168	133.801	97.0057	102.715	115.003	0.347078	0.124697	0.168626	88.1736	112.131
Anapc13	185.164	133.947	88.8213	389.24	396.582	365.004	508.241	1.62604	1.84791e-21	1.25569e-20	135.978	414.767
Anapc15	117.889	99.1279	85.8206	383.158	405.142	361.336	322.752	1.86694	1.76322e-31	1.83111e-30	100.946	368.097
Anapc16	329.775	430.975	322.577	398.363	305.283	320.983	415.496	-0.0103204	0.947565	0.95898	361.109	360.031
Anapc2	456.152	324.386	308.174	240.234	342.373	350.331	352.43	-0.170251	0.179328	0.233058	362.904	321.342
Anapc4	859.803	1036.4	1000.44	681.17	656.215	577.77	678.892	-0.573484	4.35406e-09	1.43711e-08	965.548	648.512
Anapc5	1930.24	1803.13	1782.13	2301.99	2045.68	1782.83	2010.71	0.127313	0.26494	0.328104	1838.5	2035.3
Anapc7	280.733	216.376	211.551	340.585	279.605	330.154	263.395	0.370619	0.00520155	0.00915695	236.22	303.435
Ang	52.1855	41.2145	71.7172	36.4913	17.1187	20.1761	14.8392	-1.29878	0.00141071	0.00268953	55.039	22.1563
Angel1	58.7873	28.7791	30.6073	191.579	159.774	209.098	170.65	2.27002	4.40404e-36	5.38109e-35	39.3912	182.775
Angel2	598.562	694.606	721.373	358.831	402.289	515.408	515.661	-0.567839	8.84422e-05	0.000195297	671.513	448.047
Angpt1	413.083	385.853	549.732	1003.51	1677.63	951.945	1313.27	1.45377	3.93948e-08	1.2086e-07	449.556	1236.59
Angpt2	210.943	232.009	188.445	72.9825	108.418	67.8651	81.6154	-1.3635	2.94748e-11	1.14213e-10	210.466	82.7203
Angpt4	1.88622	3.19767	0.900216	0	8.55933	0	3.70979	0.525418	0.697518	0.746927	1.9947	3.06728
Angptl1	123.233	197.19	114.627	6.08188	2.85311	11.0051	11.1294	-4.20368	3.6413e-15	1.77914e-14	145.017	7.76738
Angptl2	1659.56	1355.81	1227.29	827.136	1258.22	1177.55	1020.19	-0.398625	0.0159007	0.0258321	1414.22	1070.77
Angptl3	28.6077	43.3462	39.6095	0	17.1187	5.50257	14.8392	-2.04286	6.94401e-05	0.00015506	37.1878	9.3651
Angptl4	2134.89	3465.57	1786.63	741.989	168.333	236.611	148.392	-2.70913	0.00114913	0.00221915	2462.36	323.831
Angptl6	4.71556	1.42119	1.50036	24.3275	17.1187	7.33676	0	2.42321	0.000574832	0.00115075	2.5457	12.1957
Angptl7	16.6616	11.0142	12.603	15.2047	28.5311	38.518	22.2587	1.0011	0.00691028	0.0119227	13.4263	26.1281
Ank	493.247	516.602	382.292	85.1463	68.4746	106.383	89.035	-2.39462	1.23027e-28	1.14333e-27	464.047	87.2597
Ank1	17.6048	14.5672	12.603	3.04094	11.4124	5.50257	3.70979	-1.31434	0.0410071	0.0616823	14.925	5.91644
Ank2	561.151	623.902	579.139	60.8188	54.2091	99.0463	100.164	-2.88518	3.54555e-36	4.34787e-35	588.064	78.5596
Ank3	363.727	208.204	323.477	279.766	516.413	497.066	415.496	0.520048	0.0191892	0.0307457	298.469	427.185
Ankdd1b	22.6347	25.9367	27.6066	18.2456	22.8249	11.0051	14.8392	-0.626986	0.14819	0.196786	25.3927	16.7287
Ankef1	242.694	231.654	272.765	3.04094	5.70622	7.33676	7.41958	-5.38498	5.48357e-22	3.83737e-21	249.038	5.87588
Ankfn1	8.48801	9.59302	6.90165	0	0	1.83419	0	-3.30976	0.00980363	0.0165065	8.32756	0.458548
Ankfy1	1392.03	1493.31	1611.09	778.481	801.724	876.743	849.542	-0.847501	1.49049e-23	1.11611e-22	1498.81	826.622
Ankhd1	1117.59	1423.68	1580.48	1398.83	1888.76	2032.28	1695.37	0.38185	0.002781	0.00510101	1373.91	1753.81
Ankib1	1215.36	1699.39	1521.06	997.428	941.526	863.904	897.769	-0.657277	1.77092e-10	6.48111e-10	1478.6	925.157
Ankle1	18.8622	5.32945	9.90237	0	0	3.66838	0	-3.02714	0.00825918	0.0140802	11.3647	0.917096
Ankle2	1022.33	1148.32	1303.81	711.58	699.012	636.464	667.762	-0.759592	1.0395e-09	3.59767e-09	1158.16	678.705
Ankmy1	1.25748	0.710594	0.900216	0	5.70622	11.0051	3.70979	2.48728	0.0095066	0.0160416	0.956097	5.10529
Ankmy2	352.409	384.076	380.191	203.743	205.424	166.911	248.556	-0.877697	2.21861e-10	8.07229e-10	372.226	206.159
Ankra2	172.589	181.557	233.456	158.129	168.333	126.559	92.7447	-0.494316	0.0171657	0.0277113	195.867	136.442
Ankrd1	3.77245	16.3437	15.9038	0	5.70622	1.83419	0	-2.33254	0.0403461	0.060791	12.0066	1.8851
Ankrd10	315.314	279.974	334.88	194.62	139.802	192.59	152.101	-0.855429	1.93681e-07	5.604e-07	310.056	169.778
Ankrd11	1183.29	1077.62	946.427	1553.92	1774.63	1676.45	1472.79	0.597169	9.88471e-09	3.17688e-08	1069.11	1619.45
Ankrd12	645.717	826.421	945.827	650.761	659.068	841.894	534.21	-0.21985	0.104101	0.143498	805.988	671.483
Ankrd13a	816.106	605.071	540.429	1547.84	1534.97	1582.91	1606.34	1.26667	5.56786e-46	9.42072e-45	653.869	1568.01
Ankrd13b	53.443	12.7907	18.0043	30.4094	65.6215	44.0206	51.9371	0.951231	0.00157116	0.00297594	28.0793	47.9971
Ankrd13c	666.78	954.683	857.305	571.697	542.091	443.874	575.017	-0.619659	1.66216e-07	4.835e-07	826.256	533.17
Ankrd13d	29.2365	15.6331	12.9031	45.6141	57.0622	73.3676	59.3566	1.68444	7.74308e-09	2.50911e-08	19.2575	58.8501
Ankrd16	143.353	175.161	190.246	142.924	111.271	152.238	170.65	-0.221052	0.269096	0.33233	169.587	144.271
Ankrd17	2001.28	2369.12	2509.5	1672.52	2339.55	2311.08	2066.35	-0.111538	0.391515	0.458342	2293.3	2097.38
Ankrd2	2.82934	1.77648	1.80043	72.9825	5.70622	18.3419	14.8392	3.76201	1.91165e-05	4.55034e-05	2.13542	27.9675
Ankrd22	0.628741	1.42119	1.20029	264.562	213.983	170.58	255.975	7.73066	4.63866e-41	6.7177e-40	1.08341	226.275
Ankrd23	55.0148	29.8449	33.6081	115.556	339.52	298.973	267.105	2.71155	1.41986e-16	7.50416e-16	39.4893	255.288
Ankrd24	60.0448	25.5814	33.0079	161.17	199.718	201.761	140.972	2.21105	3.38331e-27	2.96936e-26	39.5447	175.905
Ankrd26	115.374	117.248	153.337	103.392	114.124	143.067	122.423	-0.0626414	0.765617	0.80685	128.653	120.752
Ankrd27	596.99	564.567	532.027	401.404	407.995	522.744	463.724	-0.327431	0.0141486	0.0231865	564.528	448.967
Ankrd28	516.511	610.4	742.078	589.942	576.328	414.527	600.986	-0.191639	0.178962	0.232654	622.996	545.446
Ankrd29	249.61	338.598	258.662	0	17.1187	14.6735	11.1294	-4.64983	6.61833e-27	5.73113e-26	282.29	10.7304
Ankrd32	342.978	468.992	464.211	60.8188	91.2995	104.549	81.6154	-2.26168	1.95048e-24	1.51499e-23	425.394	84.5706
Ankrd33b	82.3651	59.6899	85.8206	711.58	756.074	904.256	612.115	3.29925	9.01652e-52	1.84549e-50	75.9585	746.006
Ankrd34a	0.943112	0.710594	0.300072	6.08188	2.85311	3.66838	3.70979	2.7137	0.0111698	0.0186119	0.651259	4.07829
Ankrd34b	1.25748	1.42119	2.40058	0	0	0	0	-1.68391	0.267223	0.330428	1.69308	0
Ankrd35	14.7754	8.17183	7.5018	12.1638	0	16.5077	11.1294	0.0815721	0.881757	0.905679	10.1497	9.95021
Ankrd37	9.11675	8.88242	10.8026	6.08188	14.2656	14.6735	3.70979	0.0826678	0.883749	0.907173	9.60059	9.68269
Ankrd39	48.4131	46.8992	36.0086	63.8597	88.4464	95.3779	59.3566	0.827448	0.000528987	0.00106453	43.7736	76.7602
Ankrd40	1451.76	1827.65	1332.02	702.457	724.69	660.309	719.699	-1.13071	9.9411e-18	5.60673e-17	1537.14	701.789
Ankrd42	75.4489	75.6783	91.5219	21.2866	22.8249	16.5077	18.5489	-2.05882	5.34991e-09	1.75449e-08	80.883	19.792
Ankrd44	603.591	779.166	732.475	127.719	105.565	159.575	118.713	-2.42342	5.15003e-50	9.97287e-49	705.078	127.893
Ankrd45	0.314371	0	0.900216	3.04094	0	0	3.70979	1.56568	0.374201	0.440977	0.404862	1.68768
Ankrd46	691.615	708.107	669.46	404.445	368.051	348.496	434.045	-0.839669	4.82316e-12	1.95544e-11	689.728	388.759
Ankrd49	173.218	222.416	256.261	185.497	176.893	183.419	248.556	-0.11832	0.454599	0.520572	217.298	198.591
Ankrd50	418.742	586.951	546.131	124.679	196.865	190.756	178.07	-1.54919	7.47796e-23	5.41479e-22	517.274	172.592
Ankrd52	329.46	220.995	201.048	264.562	427.967	438.372	341.301	0.572808	2.5615e-05	6.01494e-05	250.501	368.05
Ankrd53	2.51496	4.61886	1.50036	0	0	9.17096	0	-0.223557	0.84941	0.878671	2.87806	2.29274
Ankrd54	80.4789	42.6356	42.6102	170.293	182.599	172.414	170.65	1.69282	9.57855e-25	7.55458e-24	55.2416	173.989
Ankrd55	3.45808	2.48708	7.80187	3.04094	0	1.83419	0	-1.73077	0.243972	0.305458	4.58234	1.21878
Ankrd6	43.6975	42.6356	39.0093	21.2866	25.678	20.1761	40.8077	-0.692042	0.0327496	0.0502484	41.7808	26.9871
Ankrd61	11.3173	16.699	17.7042	6.08188	8.55933	16.5077	0	-0.792101	0.165107	0.216527	15.2402	7.78723
Ankrd63	0	0	0.600144	0	0	0	0	1.64062	0.47124	NA	0.200048	0
Ankrd66	0.314371	1.77648	1.50036	9.12282	8.55933	14.6735	18.5489	3.7795	2.37193e-05	5.59392e-05	1.19707	12.7262
Ankrd9	14.7754	7.81653	4.20101	45.6141	59.9153	58.6941	14.8392	2.49189	2.04845e-10	7.46442e-10	8.93099	44.7657
Anks1	382.589	257.946	187.545	355.79	436.526	443.874	330.171	0.540811	0.000179811	0.000383032	276.027	391.59
Anks1b	3.45808	6.04005	5.10122	0	0	3.66838	3.70979	-1.35482	0.249819	0.31167	4.86645	1.84454
Anks3	181.706	135.723	132.332	215.907	242.514	275.129	237.427	0.703439	9.26985e-07	2.51778e-06	149.92	242.744
Anks6	45.2694	19.5413	25.206	18.2456	5.70622	12.8393	0	-1.57721	0.00295752	0.00540484	30.0056	9.1978
Ankub1	2.82934	2.13178	1.20029	0	0	0	0	-2.00533	0.228838	NA	2.0538	0
Ankzf1	138.009	132.17	122.429	285.848	333.814	315.481	211.458	1.14227	2.73087e-10	9.83647e-10	130.869	286.65
Anln	279.79	238.404	265.864	33.4503	28.5311	31.1812	55.6468	-2.87726	5.83891e-12	2.35932e-11	261.353	37.2024
Ano1	899.1	586.595	675.462	6154.86	5115.63	4532.29	4848.7	2.83685	7.15466e-102	4.08154e-100	720.386	5162.87
Ano10	966.375	1011.89	831.799	793.685	696.159	658.475	667.762	-0.413859	0.00137001	0.00261667	936.687	704.02
Ano2	1.57185	6.04005	2.70065	3.04094	2.85311	0	0	-1.11584	0.457374	0.52336	3.43752	1.47351
Ano3	26.7215	23.8049	81.0194	12.1638	14.2656	34.8496	22.2587	-0.904724	0.0808336	0.114194	43.8486	20.8844
Ano4	30.8083	17.0543	16.2039	547.369	1375.2	1351.8	1116.65	5.73934	1.80373e-57	4.32026e-56	21.3555	1097.75
Ano5	13.2036	10.6589	20.705	0	0	3.66838	0	-3.5502	0.00586409	0.010239	14.8558	0.917096
Ano6	2002.85	1943.47	1924.06	596.024	599.153	671.314	604.696	-1.65834	2.48571e-79	9.53947e-78	1956.8	617.797
Ano7	0	1.42119	2.40058	3.04094	0	1.83419	0	1.32565	0.363316	0.429829	1.27392	1.21878
Ano8	150.269	117.603	81.9196	82.1054	71.3278	97.2121	55.6468	-0.5798	0.019945	0.0318388	116.597	76.573
Ano9	49.9849	16.3437	37.8091	0	0	0	3.70979	-5.39563	2.79405e-06	7.25758e-06	34.7125	0.927447
Anp32a	450.179	549.289	556.933	1036.96	761.78	667.646	968.255	0.715051	6.07562e-09	1.98395e-08	518.8	858.66
Anp32b	131.721	164.858	180.343	179.415	236.808	168.746	233.717	0.369284	0.034939	0.0533146	158.974	204.671
Anp32e	323.802	380.168	401.496	173.334	182.599	155.906	185.489	-1.08072	2.88902e-13	1.26679e-12	368.489	174.332
Anpep	363.727	279.263	306.073	115.556	77.034	95.3779	89.035	-1.74581	1.40447e-15	7.01863e-15	316.354	94.2506
Antxr1	743.486	705.975	898.115	203.743	162.627	190.756	248.556	-1.96031	2.22177e-25	1.79507e-24	782.526	201.421
Antxr2	1250.88	1415.5	1789.63	188.538	125.537	198.093	252.266	-2.94537	2.5585e-56	5.90202e-55	1485.34	191.108
Antxrl	1.57185	1.77648	0.300072	33.4503	51.356	29.3471	22.2587	4.90101	2.44995e-15	1.21035e-14	1.21614	34.103
Anxa1	4683.18	8415.56	7536.61	340.585	276.752	240.279	571.308	-4.21203	4.44178e-53	9.38722e-52	6878.45	357.231
Anxa11	148.697	94.1537	70.817	124.679	139.802	143.067	133.552	0.408299	0.0265432	0.0414509	104.556	135.275
Anxa2	7393.37	6286.62	4234.91	434.854	542.091	427.367	834.703	-3.40493	4.15781e-41	6.04727e-40	5971.64	559.754
Anxa3	975.492	921.285	1647.39	127.719	99.8589	141.233	233.717	-2.95203	1.73214e-29	1.65716e-28	1181.39	150.632
Anxa4	1130.79	1205.88	1269.9	504.796	399.435	401.688	467.434	-1.42671	4.66983e-20	2.96781e-19	1202.19	443.338
Anxa5	5141.53	6596.09	6472.85	872.75	1218.28	997.8	1198.26	-2.48472	8.75411e-72	2.95644e-70	6070.16	1071.77
Anxa6	7438.95	7687.56	5704.67	1696.84	2185.48	2045.12	1958.77	-1.81801	7.27036e-35	8.53143e-34	6943.73	1971.55
Anxa7	1483.83	1605.23	1349.42	1496.14	1355.23	1058.33	1398.59	-0.16631	0.202867	0.259771	1479.49	1327.07
Anxa8	66.0178	112.274	61.2147	63.8597	68.4746	77.036	100.164	-0.0405522	0.917695	0.935309	79.8354	77.3837
Anxa9	42.44	46.5439	41.1098	9.12282	19.9718	11.0051	0	-2.06481	9.9035e-06	2.4268e-05	43.3646	10.0249
Aoah	57.8442	203.585	155.437	15.2047	11.4124	20.1761	14.8392	-2.93623	9.38762e-13	3.9839e-12	138.956	15.4081
Aoc1	1.25748	39.0827	0	0	0	0	0	-4.06911	0.284818	0.348636	13.4467	0
Aoc2	23.2634	23.8049	19.8047	24.3275	19.9718	34.8496	25.9685	0.274326	0.409937	0.477064	22.291	26.2794
Aoc3	10046.7	9025.61	7678.84	319.299	313.842	531.915	304.203	-4.59442	1.83806e-106	1.12863e-104	8917.03	367.315
Aox1	1228.56	1754.81	1155.88	225.03	111.271	148.569	100.164	-3.22537	3.4762e-37	4.42345e-36	1379.75	146.259
Aox2	4.40119	0.710594	1.20029	0	2.85311	1.83419	3.70979	0.242115	0.843311	0.873415	2.10402	2.09927
Aox3	57.5298	30.5555	123.93	33.4503	11.4124	34.8496	11.1294	-1.56922	0.0105789	0.0177075	70.6717	22.7104
Aox4	0	1.06589	0.900216	0	0	1.83419	0	1.07731	0.557566	NA	0.655369	0.458548
Ap1ar	287.649	313.017	296.171	425.732	342.373	313.647	370.979	0.269033	0.02729	0.0425306	298.946	363.183
Ap1b1	593.217	550.355	440.506	702.457	861.639	880.412	890.35	0.66066	2.56311e-06	6.68427e-06	528.026	833.714
Ap1g1	1334.5	1863.53	1803.13	2301.99	2630.57	2323.92	2552.34	0.582587	4.80862e-07	1.34162e-06	1667.06	2452.2
Ap1g2	111.287	63.9535	63.6152	130.76	139.802	172.414	140.972	0.920567	5.32805e-08	1.62078e-07	79.6186	145.987
Ap1m1	202.769	147.093	142.834	574.738	536.385	546.589	504.531	1.72404	1.08211e-41	1.61418e-40	164.232	540.561
Ap1m2	108.458	30.9108	54.9132	1386.67	1629.13	1467.35	1765.86	4.67535	4.55838e-84	1.91474e-82	64.7606	1562.25
Ap1s1	291.736	262.209	168.64	288.889	282.458	258.621	307.913	0.23676	0.146634	0.195012	240.862	284.47
Ap1s2	266.586	340.019	545.531	179.415	136.949	174.248	129.843	-1.22417	1.99072e-09	6.74735e-09	384.045	155.114
Ap1s3	24.8353	13.5013	27.3065	15.2047	19.9718	42.1864	51.9371	0.556146	0.184965	0.239317	21.881	32.325
Ap2a1	304.939	196.479	134.432	419.65	439.379	418.196	337.591	0.975151	2.28265e-11	8.90181e-11	211.95	403.704
Ap2a2	1985.56	2104.07	1920.16	1994.86	1891.61	1698.46	1643.44	-0.153987	0.0872941	0.122368	2003.26	1807.09
Ap2b1	1691.63	1824.45	1708.91	960.937	1092.74	1073	1124.07	-0.710216	4.51113e-12	1.83319e-11	1741.66	1062.69
Ap2m1	556.436	535.788	499.02	936.609	833.108	737.345	916.318	0.671113	8.98618e-15	4.29617e-14	530.414	855.845
Ap2s1	242.38	149.58	155.437	687.252	693.306	537.418	712.28	1.83894	8.02937e-47	1.4094e-45	182.466	657.564
Ap3b1	602.334	801.905	751.98	805.849	950.086	933.603	816.154	0.311184	0.00326525	0.00592298	718.74	876.423
Ap3b2	40.2394	44.0568	26.7064	0	0	0	0	-6.18445	6.86415e-08	2.06979e-07	37.0009	0
Ap3d1	1357.45	1190.96	836.6	2417.55	2633.42	2617.39	2374.27	1.15774	1.00777e-21	6.94015e-21	1128.34	2510.66
Ap3m1	490.418	826.776	758.882	669.007	858.786	829.054	823.573	0.258166	0.0565084	0.0827007	692.025	795.105
Ap3m2	283.248	366.311	301.572	76.0235	57.0622	77.036	48.2273	-2.24879	5.78386e-25	4.59822e-24	317.044	64.5872
Ap3s1	734.998	1296.12	1078.16	650.761	584.888	601.615	690.021	-0.66745	9.30376e-07	2.52659e-06	1036.43	631.821
Ap3s2	285.763	266.117	255.361	191.579	134.096	166.911	181.78	-0.684302	3.19181e-06	8.23985e-06	269.08	168.592
Ap4b1	244.58	253.682	235.856	760.235	773.193	597.946	589.857	1.46676	6.29454e-29	5.93134e-28	244.706	680.308
Ap4e1	292.05	375.549	418.9	173.334	202.571	207.264	192.909	-0.863511	8.48188e-10	2.95127e-09	362.167	194.019
Ap4m1	172.589	129.683	126.03	133.801	216.836	198.093	140.972	0.290068	0.101781	0.140691	142.768	172.426
Ap4s1	213.772	262.209	248.76	212.866	179.746	157.74	207.748	-0.359032	0.0176014	0.0283523	241.58	189.525
Ap5b1	30.1796	12.7907	9.30223	112.515	199.718	168.746	111.294	3.2396	1.23585e-33	1.3987e-32	17.4242	148.068
Ap5m1	228.862	290.278	349.584	355.79	308.136	260.455	370.979	0.17602	0.222881	0.281936	289.574	323.84
Ap5s1	73.5627	32.6873	28.8069	100.351	165.48	137.564	111.294	1.62009	3.75568e-15	1.83026e-14	45.019	128.672
Ap5z1	78.5926	42.2803	36.3087	115.556	156.921	148.569	92.7447	1.35799	2.62298e-12	1.08292e-11	52.3939	128.448
Apaf1	392.963	449.806	564.735	109.474	162.627	177.917	170.65	-1.5677	4.7006e-19	2.84496e-18	469.168	155.167
Apba1	151.841	184.044	157.238	27.3685	22.8249	45.8548	22.2587	-2.41378	1.2191e-13	5.46475e-13	164.374	29.5767
Apba2	2.20059	1.42119	0.300072	0	0	0	0	-1.23911	0.605154	NA	1.30728	0
Apba3	64.446	23.8049	19.2046	288.889	313.842	247.616	241.136	3.0964	2.80296e-62	7.7086e-61	35.8185	272.871
Apbb1	84.8801	32.332	30.3073	36.4913	48.5029	34.8496	48.2273	-0.130464	0.645218	0.700698	49.1731	42.0178
Apbb1ip	145.239	203.585	216.052	42.5732	31.3842	44.0206	51.9371	-2.11767	9.67987e-18	5.4667e-17	188.292	42.4788
Apbb2	948.142	1143.7	1069.16	288.889	399.435	473.221	348.72	-1.45984	9.89587e-22	6.82048e-21	1053.67	377.567
Apbb3	91.4818	63.9535	82.5198	109.474	114.124	144.901	115.003	0.617138	0.00538493	0.00946496	79.3184	120.876
Apc	2254.35	3184.17	2888.19	2724.68	3081.36	3617.02	2812.02	0.168337	0.209311	0.26691	2775.57	3058.77
Apc2	19.8053	9.23772	8.70208	18.2456	28.5311	31.1812	22.2587	1.07996	0.00219948	0.00408317	12.5817	25.0542
Apcdd1	1340.79	1061.27	955.729	51.696	59.9153	77.036	96.4545	-3.98437	9.79559e-61	2.57245e-59	1119.26	71.2755
Apeh	312.799	204.651	162.339	270.644	293.87	298.973	244.846	0.325871	0.0263012	0.0411147	226.596	277.083
Apex1	39.6107	16.699	12.0029	54.7369	97.0057	69.6993	66.7762	1.80049	1.72186e-12	7.18441e-12	22.7708	72.0545
Apex2	122.919	92.3772	89.4214	24.3275	31.3842	42.1864	22.2587	-1.69038	3.87249e-09	1.28444e-08	101.573	30.0392
Aph1a	147.44	138.921	136.533	231.111	188.305	229.274	159.521	0.530648	0.00147964	0.00281333	140.965	202.053
Aph1b	371.272	515.536	460.61	63.8597	31.3842	53.1915	59.3566	-3.10374	2.57395e-40	3.63714e-39	449.139	51.948
Aph1c	45.2694	53.6498	75.9182	27.3685	19.9718	36.6838	7.41958	-1.22716	0.00120794	0.00232608	58.2791	22.8609
Api5	817.678	1113.15	1235.7	1319.77	944.379	895.085	1124.07	0.0411775	0.737577	0.781644	1055.51	1070.82
Apip	357.125	483.204	391.894	340.585	308.136	282.465	326.462	-0.381785	0.00538727	0.0094681	410.741	314.412
Apitd1	9.74549	3.90827	10.5025	6.08188	0	1.83419	3.70979	-1.63574	0.0777144	0.110202	8.05209	2.90647
Aplf	74.1915	74.9677	92.1221	91.2282	97.0057	71.5335	59.3566	-0.00299527	0.990611	0.993081	80.4271	79.781
Apln	357.754	201.098	133.532	2600	1166.92	904.256	1164.87	2.66422	4.4566e-19	2.69922e-18	230.795	1459.01
Aplnr	780.582	728.359	769.684	170.293	208.277	146.735	174.36	-2.13732	8.93122e-49	1.66644e-47	759.542	174.916
Aplp1	11.6317	2.48708	6.00144	282.807	256.78	216.435	252.266	5.316	2.93867e-79	1.12522e-77	6.70674	252.072
Aplp2	11793.6	14421.5	10203	1943.16	1457.94	1570.07	1506.17	-2.90568	3.23278e-78	1.22396e-76	12139.4	1619.34
Apmap	2144.64	2521.19	1807.33	1015.67	813.136	819.883	949.706	-1.27027	3.34244e-16	1.72759e-15	2157.72	899.6
Apoa1bp	362.155	279.263	249.36	504.796	536.385	475.056	537.92	0.785278	4.85179e-14	2.22931e-13	296.926	513.539
Apoa2	2.82934	2.13178	1.50036	9.12282	0	11.0051	7.41958	1.72805	0.0458423	0.0683829	2.15383	6.88689
Apob	18.8622	20.2519	22.2053	3.04094	14.2656	9.17096	7.41958	-1.26522	0.0348223	0.0531606	20.4398	8.47426
Apobec1	342.664	504.166	412.599	109.474	94.1526	113.72	103.874	-1.95955	1.78853e-20	1.16158e-19	419.81	105.305
Apobec2	48.0987	28.4238	69.0165	9.12282	5.70622	12.8393	7.41958	-2.40647	4.61342e-05	0.000105245	48.513	8.77199
Apobec3	329.46	293.12	323.778	1231.58	850.227	814.381	994.224	1.61086	1.89905e-28	1.74849e-27	315.453	972.603
Apobec4	3.14371	1.77648	1.20029	0	2.85311	3.66838	0	-0.135406	0.910969	0.929464	2.04016	1.63037
Apobr	117.26	131.815	108.926	909.241	439.379	663.977	586.147	2.43008	1.40641e-25	1.14617e-24	119.334	649.686
Apoc1	546.062	425.291	257.162	447.018	114.124	181.585	170.65	-0.860952	0.0217955	0.0345349	409.505	228.344
Apoc3	0.943112	0.355297	0.600144	0	2.85311	3.66838	0	1.41219	0.417427	NA	0.632851	1.63037
Apod	364.355	465.084	511.022	553.451	596.3	192.59	660.343	0.0887492	0.767899	0.808501	446.821	500.671
Apoe	7219.83	4710.17	4484.87	3615.68	1803.17	2542.19	2496.69	-1.04758	5.60032e-07	1.55257e-06	5471.63	2614.43
Apof	6.91615	2.13178	4.50108	30.4094	8.55933	16.5077	11.1294	1.90759	0.00172129	0.00324467	4.51634	16.6515
Apol10b	89.91	100.549	122.129	51.696	71.3278	95.3779	103.874	-0.345055	0.180151	0.23393	104.196	80.5689
Apol11b	7.54489	4.61886	4.80115	6.08188	8.55933	9.17096	7.41958	0.519866	0.451854	0.518026	5.65497	7.80794
Apol6	2006.94	2223.45	1497.06	97.3101	97.0057	155.906	140.972	-3.96132	1.81027e-69	5.86721e-68	1909.15	122.799
Apol7a	2.82934	6.04005	3.60086	428.772	388.023	379.678	426.626	6.65524	1.85316e-83	7.65098e-82	4.15675	405.775
Apol7c	6.91615	7.10594	3.90093	0	0	3.66838	0	-2.21271	0.0578566	0.0845054	5.97434	0.917096
Apol7e	2.82934	0.355297	1.20029	6.08188	0	1.83419	0	0.63829	0.607444	0.666448	1.46164	1.97902
Apol8	0	1.77648	1.50036	3.04094	0	0	0	0.743131	0.720879	NA	1.09228	0.760235
Apol9a	5.3443	6.39535	14.1034	0	0	1.83419	7.41958	-1.97637	0.037278	0.056572	8.61434	2.31344
Apol9b	7.85926	3.90827	12.603	6.08188	11.4124	12.8393	11.1294	0.380674	0.536386	0.600107	8.12352	10.3658
Apold1	121.661	189.373	146.135	51.696	97.0057	88.0412	59.3566	-0.99266	0.000106568	0.000232916	152.39	74.0249
Apom	0.943112	3.55297	5.10122	6.08188	2.85311	7.33676	3.70979	1.02386	0.20523	0.2623	3.1991	4.99539
Apon	1.25748	1.77648	0.900216	0	0	0	0	-1.35693	0.448966	0.515065	1.31139	0
Apoo	20.1197	28.0685	24.906	45.6141	28.5311	22.0103	89.035	0.842153	0.0378418	0.0573554	24.3647	46.2976
Apool	321.915	463.663	411.399	167.252	242.514	155.906	207.748	-1.02846	7.23821e-08	2.17481e-07	398.992	193.355
Apopt1	258.413	312.661	241.258	261.521	216.836	199.927	263.395	-0.209671	0.259189	0.32179	270.777	235.42
App	3239.9	4795.44	3129.45	1778.95	1509.3	1524.21	1413.43	-1.24708	1.23733e-11	4.89883e-11	3721.6	1556.47
Appbp2	497.649	627.81	588.441	389.24	419.407	394.351	463.724	-0.446744	0.000385037	0.00078962	571.3	416.681
Appbp2os	9.43112	13.5013	10.5025	18.2456	11.4124	14.6735	11.1294	0.336969	0.493053	0.558359	11.145	13.8652
Appl1	928.965	1331.3	1459.85	383.158	450.791	401.688	508.241	-1.47394	6.83965e-37	8.58056e-36	1240.04	435.97
Appl2	571.84	565.988	739.377	1575.21	1982.91	2008.44	1821.51	1.57154	5.84665e-19	3.51716e-18	625.735	1847.02
Aprt	69.4759	30.2002	24.906	182.456	194.011	143.067	244.846	2.28528	1.30765e-24	1.02607e-23	41.5274	191.095
Aptx	239.55	259.722	235.856	155.088	148.362	155.906	200.329	-0.583297	0.000287935	0.000599664	245.043	164.921
Aqp1	3788.17	4324.32	3802.81	4275.56	4111.33	4545.13	3505.75	0.0513965	0.70412	0.752231	3971.77	4109.44
Aqp11	12.2605	14.2119	15.0036	3.04094	2.85311	1.83419	11.1294	-1.72967	0.0150956	0.0246284	13.8253	4.7144
Aqp2	1.88622	0.710594	1.50036	0	0	0	0	-1.44926	0.528266	NA	1.36573	0
Aqp3	3.14371	2.13178	1.50036	520.001	590.594	476.89	456.304	7.85107	1.12314e-106	6.94699e-105	2.25862	510.947
Aqp4	4.71556	2.84238	9.90237	0	0	0	0	-3.42988	0.0278608	0.0433242	5.8201	0
Aqp5	73.8771	52.9393	66.3159	9.12282	11.4124	0	11.1294	-3.26989	4.20521e-10	1.49242e-09	64.3774	7.91616
Aqp7	1204.04	1329.52	1104.86	130.76	77.034	143.067	85.3252	-3.44831	1.22899e-60	3.20259e-59	1212.81	109.047
Aqp9	21.6916	14.2119	24.906	757.194	316.695	363.17	374.689	4.4229	5.67488e-36	6.89396e-35	20.2698	452.937
Aqr	563.666	615.73	674.562	693.334	690.453	662.143	693.731	0.15569	0.104257	0.143666	617.986	684.915
Ar	1625.3	1870.28	2129.31	255.439	439.379	366.838	307.913	-2.429	1.85797e-32	2.00985e-31	1874.96	342.392
Araf	555.807	519.089	472.913	881.872	878.758	937.272	871.801	0.791152	1.13032e-17	6.3474e-17	515.936	892.426
Arap1	541.975	253.682	251.16	586.901	890.17	832.723	704.86	1.17705	1.1795e-22	8.47891e-22	348.939	753.664
Arap2	1615.86	2224.16	2067.2	392.281	385.17	357.667	419.206	-2.32587	4.35857e-78	1.64651e-76	1969.07	388.581
Arap3	374.73	280.685	246.659	273.685	293.87	432.869	326.462	0.1579	0.299523	0.363971	300.691	331.721
Arc	8.17363	5.32945	6.60158	15.2047	17.1187	7.33676	14.8392	0.988419	0.0778774	0.110424	6.70156	13.6248
Arcn1	2077.36	2929.78	2736.66	5628.78	5349.58	4381.88	5379.2	1.01799	5.35434e-50	1.03448e-48	2581.27	5184.86
[truncated: 15,795 more rows]
