# Supplementary material for: Cell-specific and shared enhancers control a high-density multi-gene locus active in mammary and salivary glands
Source: Research Square preprint supplement (doi:10.21203/rs.3.rs-2533579/v1), 2023-02-07
Supplement: Supplementary file 4 [file 6d03bbd1cdbacd1b55827d04.xlsx]

## Sheet: Sheet1
Gene	WT1_p6	WT2_p6	WT4_p6	MUT1_p6	MUT2_p6	MUT3_p6	MUT4_p6	log2FoldChange	pvalue	padj
0610005C13Rik	18.9282	12.2949	5.69423	7.63974	12.5637	2.69689	1.69672	-0.845708	0.342978	0.671532
0610007P14Rik	102.753	180.911	188.723	224.417	158.841	173.949	171.369	0.241071	0.268188	0.6031
0610009B22Rik	81.1208	89.5773	88.6673	135.605	120.252	86.3004	156.098	0.517503	0.0510065	0.237118
0610009L18Rik	24.3362	31.6155	15.4558	20.0543	23.3326	18.8782	14.4221	-0.259879	0.595233	0.849315
0610009O20Rik	446.164	425.053	459.605	482.259	437.037	467.91	469.143	0.0658563	0.63066	0.868359
0610010F05Rik	456.98	501.457	419.746	451.7	442.421	430.154	515.803	0.00464429	0.975764	0.994989
0610010K14Rik	109.513	108.02	144.796	134.65	127.432	105.179	132.344	0.0595265	0.78615	0.93662
0610011F06Rik	125.737	131.731	130.154	127.966	114.868	109.224	145.069	-0.0572199	0.798226	0.939892
0610012G03Rik	78.4168	181.789	143.169	151.84	175.892	175.298	195.123	0.434503	0.0423582	0.211933
0610030E20Rik	671.95	433.835	475.875	388.672	506.137	446.335	408.909	-0.236245	0.110137	0.374373
0610037L13Rik	190.634	173.885	180.588	228.237	228.839	226.539	212.09	0.303744	0.0845966	0.322649
0610038B21Rik	5.40805	8.78209	20.3365	6.68477	11.6663	20.2267	16.1188	0.39106	0.594796	0.848965
0610039H22Rik	25.6882	13.1731	17.8961	8.59471	13.4611	1.34844	6.78688	-1.22679	0.108459	0.371402
0610039K10Rik	0	1.75642	4.06731	0	1.79481	1.34844	1.69672	-0.122824	0.949644	NA
0610040B10Rik	10.8161	10.5385	5.69423	13.3695	6.28185	10.7876	13.5738	0.329767	0.651072	0.878415
0610040F04Rik	1.35201	0	4.88077	3.81987	3.58963	0	0	0.844127	0.687995	NA
0610040J01Rik	216.322	111.532	204.992	153.75	87.0484	90.3458	79.7458	-0.732736	0.00726049	0.0635826
0610043K17Rik	63.5446	22.8334	31.725	18.1444	41.2807	24.272	27.9959	-0.337876	0.449548	0.757382
1010001N08Rik	5.40805	0.878209	7.32115	3.81987	10.7689	4.04533	3.39344	0.708188	0.518059	NA
1110001J03Rik	21.6322	71.1349	55.3154	64.9378	70.8951	28.3173	62.7786	0.331665	0.389711	0.712324
1110002L01Rik	25.6882	26.3463	21.9634	21.9643	28.717	36.408	38.1762	0.345987	0.436286	0.747195
1110004E09Rik	75.7127	117.68	116.325	101.227	111.278	87.6489	108.59	0.00317687	0.989511	0.997982
1110004F10Rik	343.411	449.643	486.45	578.71	472.933	413.972	484.413	0.197996	0.197067	0.519873
1110006O24Rik	0	1.75642	8.13461	3.81987	5.38444	10.7876	5.09016	1.58023	0.197739	NA
1110007C09Rik	47.3205	52.6925	90.2942	56.3431	38.5885	72.816	83.1392	0.0216181	0.951999	0.986756
1110008F13Rik	73.0087	124.706	113.885	124.146	108.586	132.148	133.192	0.280383	0.227315	0.557076
1110008L16Rik	304.203	230.091	265.188	230.147	236.018	211.706	172.217	-0.313849	0.0989443	0.355023
1110008P14Rik	93.2889	137.879	81.3461	121.281	79.8692	82.2551	143.373	0.0412473	0.894088	0.972359
1110012L19Rik	67.6007	102.75	115.511	148.975	113.971	111.921	154.401	0.488626	0.0284128	0.163841
1110017D15Rik	0	3.51283	1.62692	0	0	1.34844	3.39344	-0.165077	0.941512	NA
1110019D14Rik	81.1208	40.3976	56.9423	40.1086	46.6651	45.8471	66.172	-0.181044	0.607389	0.855684
1110020A21Rik	10.8161	7.90388	8.13461	5.72981	7.17925	10.7876	5.09016	-0.343234	0.653915	NA
1110028F11Rik	164.946	62.3528	174.081	51.5683	55.6392	49.8924	42.418	-1.27134	7.40781e-06	0.00025729
1110032A03Rik	196.042	193.206	162.692	227.282	180.379	231.932	261.295	0.295852	0.169692	0.481363
1110032F04Rik	75.7127	21.077	43.1134	54.4332	17.9481	24.272	28.8442	-0.410512	0.375909	0.699647
1110034G24Rik	48.6725	51.8143	68.3307	49.6583	34.9989	37.7564	39.8729	-0.467219	0.161914	0.469298
1110037F02Rik	1065.39	1095.13	1049.36	1037.1	1076.89	1089.54	1093.54	0.0054042	0.961368	0.989927
1110038B12Rik	170.354	138.757	180.588	125.101	128.329	114.618	112.832	-0.428851	0.0418528	0.210181
1110038F14Rik	133.849	150.174	117.138	145.155	129.227	146.98	109.438	-0.00931336	0.967203	0.990938
1110046J04Rik	2.70403	9.66029	4.88077	8.59471	6.28185	10.7876	8.48359	0.716775	0.385421	NA
1110051M20Rik	95.9929	121.193	106.563	129.876	124.74	148.329	151.856	0.361846	0.105152	0.365198
1110058D11Rik	35.1523	14.0513	24.4038	8.59471	13.4611	25.6204	13.5738	-0.621084	0.270067	0.604036
1110059E24Rik	177.114	202.866	215.567	239.697	215.378	177.995	213.787	0.0940582	0.614974	0.859709
1110059G10Rik	89.2329	97.4812	109.004	118.416	97.8173	84.952	115.377	0.078607	0.742504	0.920019
1110065P20Rik	13.5201	17.5642	16.2692	10.5046	6.28185	12.136	17.8155	-0.450156	0.481735	0.781141
1190002F15Rik	29.7443	26.3463	47.9942	47.7484	52.947	40.4533	35.6311	0.390258	0.321075	0.650669
1190002N15Rik	175.762	324.059	262.748	304.635	322.169	330.369	428.422	0.473851	0.00775245	0.0666765
1190007I07Rik	39.2084	32.4937	52.0615	47.7484	28.717	32.3627	45.8114	-0.083447	0.818652	0.948392
1200014J11Rik	502.949	551.515	470.18	542.422	433.447	376.216	408.061	-0.207487	0.252762	0.585821
1300002E11Rik	324.483	184.424	176.521	172.849	194.737	183.388	179.004	-0.251731	0.183582	0.502441
1300017J02Rik	8.11208	0	1.62692	2.8649	2.69222	4.04533	2.54508	1.28848	0.346444	NA
1500004A13Rik	66.2486	70.2567	68.3307	42.0186	54.7418	60.68	50.0532	-0.40882	0.184648	0.503601
1500009L16Rik	0	7.02567	6.50769	11.4596	7.17925	13.4844	16.9672	2.01794	0.0315632	0.175475
1500011B03Rik	58.1366	41.2758	40.6731	46.7934	46.6651	75.5129	72.9589	0.398397	0.268703	0.603494
1500011K16Rik	81.1208	126.462	125.273	89.767	109.484	76.8613	158.643	-0.0231381	0.935522	0.982107
1500012F01Rik	290.683	288.052	353.042	316.094	246.787	200.918	283.352	-0.249624	0.163709	0.471534
1500015A07Rik	62.1926	43.0322	65.0769	43.9285	48.46	60.68	33.9344	-0.276416	0.433815	0.745447
1500015L24Rik	4.05604	3.51283	9.76153	2.8649	1.79481	0	0	-2.16944	0.15193	NA
1500015O10Rik	68.9527	24.5898	199.298	84.9921	37.6911	43.1502	111.983	-0.114892	0.701416	0.902348
1500017E21Rik	2.70403	9.66029	7.32115	3.81987	8.97407	16.1813	9.33195	0.587181	0.491552	NA
1500026H17Rik	10.8161	19.3206	8.13461	5.72981	6.28185	2.69689	18.6639	-0.624293	0.457767	0.76397
1600002D24Rik	6.76007	3.51283	5.69423	10.5046	4.48703	2.69689	3.39344	0.0157724	0.987204	NA
1600002H07Rik	101.401	97.4812	125.273	110.776	81.664	72.816	78.0491	-0.327962	0.209842	0.535657
1600002K03Rik	41.9124	50.0579	62.6365	43.9285	53.8444	35.0595	61.9302	-0.0679242	0.845	0.957932
1600010M07Rik	1.35201	0	1.62692	1.90994	2.69222	2.69689	11.0287	2.66347	0.0773958	NA
1600012H06Rik	235.25	324.937	274.136	377.212	306.913	327.672	330.012	0.27571	0.0958239	0.348409
1600014C10Rik	584.07	592.791	427.067	621.684	672.157	473.304	714.319	0.228888	0.253833	0.587405
1600020E01Rik	129.793	50.0579	56.9423	69.7126	81.664	68.7706	67.0204	0.0232591	0.933971	0.981764
1600023N17Rik	2.70403	2.63463	14.6423	11.4596	8.97407	2.69689	1.69672	0.342982	0.745378	NA
1600029I14Rik	4.05604	1.75642	2.44038	0	0	2.69689	1.69672	-1.29401	0.480916	NA
1600029O15Rik	0	1.75642	3.25384	0	6.28185	6.74222	1.69672	1.31984	0.443583	NA
1700001C19Rik	2.70403	1.75642	1.62692	5.72981	0.897407	2.69689	0	0.20208	0.901521	NA
1700001D01Rik	56.7845	18.4424	20.3365	19.0994	15.2559	31.0142	18.6639	-0.401093	0.395469	0.717612
1700001G11Rik	1.35201	2.63463	0	0	6.28185	0	3.39344	1.49435	0.483213	NA
1700001G17Rik	0	0	1.62692	0	7.17925	5.39378	0.848359	2.83833	0.192292	NA
1700001J03Rik	8.11208	4.39104	4.06731	1.90994	3.58963	2.69689	0.848359	-1.27561	0.264042	NA
1700001K19Rik	27.0403	11.4167	7.32115	12.4146	8.97407	28.3173	13.5738	0.234322	0.709073	0.9054
1700001K23Rik	2.70403	4.39104	8.94807	6.68477	5.38444	2.69689	5.93852	0.0736947	0.937869	NA
1700001L05Rik	159.538	90.4555	196.044	74.4875	76.2796	91.6942	64.4753	-0.885407	0.00109429	0.0152434
1700001L19Rik	1.35201	1.75642	1.62692	0	2.69222	2.69689	0	-0.851455	0.670266	NA
1700001O22Rik	25.6882	15.8078	39.0461	21.9643	9.87147	12.136	23.7541	-0.619747	0.219686	0.546221
1700001P01Rik	6.76007	1.75642	2.44038	1.90994	3.58963	1.34844	3.39344	-0.199931	0.871195	NA
1700003D09Rik	1.35201	0	0.813461	1.90994	1.79481	5.39378	0.848359	2.00767	0.259488	NA
1700003E16Rik	29.7443	8.78209	24.4038	6.68477	9.87147	12.136	2.54508	-1.32579	0.0610619	0.264726
1700003G13Rik	8.11208	1.75642	9.76153	4.77484	2.69222	2.69689	10.1803	-0.0882335	0.928184	NA
1700003G18Rik	1.35201	0.878209	4.06731	0	0	1.34844	1.69672	-1.28125	0.533581	NA
1700007J10Rik	40.5604	21.9552	31.725	25.7841	35.8963	47.1955	23.7541	0.0875749	0.836012	0.954701
1700007L15Rik	10.8161	5.26925	15.4558	11.4596	6.28185	16.1813	11.0287	0.208272	0.767777	0.929626
1700008J07Rik	37.8564	25.468	39.0461	20.0543	31.4092	43.1502	23.7541	-0.219228	0.624962	0.864748
1700008O03Rik	5.40805	0	3.25384	4.77484	2.69222	2.69689	0	0.805705	0.620865	NA
1700009J07Rik	0	1.75642	3.25384	0	5.38444	0	2.54508	0.750626	0.724226	NA
1700010I14Rik	29.7443	19.3206	18.7096	9.54968	21.5378	16.1813	16.1188	-0.477775	0.371997	0.69648
1700011L22Rik	0	1.75642	0	1.90994	2.69222	4.04533	0.848359	2.39037	0.204815	NA
1700012B07Rik	40.5604	0.878209	59.3827	21.9643	0	1.34844	5.09016	-1.17459	0.226456	0.555718
1700012D01Rik	16.2242	0.878209	12.2019	13.3695	9.87147	8.09066	16.1188	1.10935	0.161212	0.468212
1700012D14Rik	29.7443	11.4167	17.8961	11.4596	26.0248	18.8782	12.7254	-0.098254	0.858568	0.962273
1700012D16Rik	5.40805	6.14746	4.06731	15.2795	9.87147	4.04533	8.48359	0.859096	0.31478	NA
1700015E13Rik	45.9684	9.66029	39.0461	14.3245	15.2559	17.5298	18.6639	-0.630299	0.197028	0.519861
1700016C15Rik	5.40805	6.14746	13.8288	2.8649	0.897407	0	4.2418	-2.18401	0.057598	NA
1700017B05Rik	327.187	461.938	367.684	369.573	257.556	360.035	273.172	-0.283912	0.162623	0.470194
1700018L02Rik	0	1.75642	0	6.68477	0	1.34844	1.69672	2.43004	0.279817	NA
1700019D03Rik	17.5762	15.8078	11.3885	30.559	14.3585	31.0142	31.3893	0.863374	0.113618	0.382164
1700019G17Rik	146.017	106.263	97.6153	121.281	100.51	83.6035	85.6843	-0.222493	0.405349	0.723981
1700019L03Rik	18.9282	14.9295	13.0154	9.54968	10.7689	13.4844	11.877	-0.434765	0.465716	0.770164
1700019N19Rik	2.70403	3.51283	2.44038	1.90994	0	0	0	-2.65147	0.224487	NA
1700020A23Rik	1.35201	1.75642	2.44038	1.90994	2.69222	0	1.69672	-0.179078	0.913635	NA
1700020D05Rik	29.7443	11.4167	16.2692	12.4146	17.9481	21.5751	20.3606	0.0480817	0.927875	0.980268
1700020I14Rik	602.998	674.464	601.961	606.405	933.303	608.148	671.052	0.167014	0.375454	0.69908
1700020L24Rik	25.6882	50.0579	30.0981	32.4689	52.0496	44.4987	44.1147	0.333549	0.367889	0.692983
1700021F05Rik	85.1768	137.879	124.46	160.435	164.225	121.36	186.639	0.46646	0.0352163	0.188204
1700021K19Rik	644.91	497.066	549.9	601.63	523.188	555.559	529.376	-0.0164754	0.90408	0.974941
1700022H01Rik	0	4.39104	0.813461	0	0	2.69689	1.69672	0.0203861	0.992939	NA
1700022I11Rik	10.8161	5.26925	9.76153	3.81987	8.97407	10.7876	15.2705	0.257836	0.745929	0.921533
1700024F13Rik	10.8161	9.66029	7.32115	0.954968	3.58963	4.04533	3.39344	-1.64239	0.0873543	NA
1700024P16Rik	97.3449	91.3337	69.1442	61.1179	46.6651	44.4987	44.1147	-0.78711	0.0124136	0.0934469
1700025G04Rik	1139.75	824.638	973.713	847.056	820.23	787.491	751.646	-0.269784	0.0247493	0.149893
1700025N23Rik	4.05604	3.51283	5.69423	4.77484	8.97407	5.39378	3.39344	0.340925	0.72566	NA
1700026L06Rik	0	2.63463	1.62692	1.90994	2.69222	4.04533	1.69672	1.16197	0.454188	NA
1700028E10Rik	24.3362	2.63463	26.8442	19.0994	8.07666	14.8329	11.877	0.155209	0.804441	0.942181
1700028J19Rik	5.40805	2.63463	1.62692	1.90994	3.58963	2.69689	0	-0.637232	0.656226	NA
1700028K03Rik	9.46409	14.9295	21.15	17.1894	38.5885	14.8329	19.5123	0.617115	0.311278	0.640385
1700029H14Rik	9.46409	0.878209	1.62692	0	3.58963	0	0.848359	-1.11714	0.525189	NA
1700029I15Rik	12.1681	13.1731	17.8961	10.5046	21.5378	12.136	21.209	0.202909	0.737811	0.91706
1700029J07Rik	112.217	43.9104	56.1288	43.9285	52.947	59.3315	61.0819	-0.239652	0.450358	0.757713
1700030C10Rik	51.3765	19.3206	19.5231	22.9192	16.1533	43.1502	8.48359	-0.330205	0.547045	0.820788
1700030J22Rik	2.70403	16.686	17.0827	21.9643	12.5637	2.69689	8.48359	0.209755	0.794307	0.938666
1700030K09Rik	181.17	120.315	139.915	137.515	104.099	103.83	106.045	-0.353781	0.12918	0.41168
1700034H15Rik	17.5762	2.63463	15.4558	10.5046	0.897407	8.09066	3.39344	-0.685541	0.461027	NA
1700034I23Rik	14.8721	2.63463	8.94807	0	12.5637	5.39378	12.7254	0.187801	0.865509	NA
1700034J05Rik	31.0963	22.8334	28.4711	31.5139	36.7937	39.1049	21.209	0.218237	0.611907	0.857913
1700037C18Rik	36.5044	13.1731	29.2846	23.8742	24.23	8.09066	32.2377	-0.12678	0.81711	0.947618
1700037H04Rik	182.522	411.002	219.634	236.832	339.22	202.267	382.61	0.165743	0.49544	0.788355
1700040L02Rik	5.40805	8.78209	14.6423	11.4596	10.7689	13.4844	6.78688	0.199127	0.785427	0.936585
1700047A11Rik	14.8721	3.51283	9.76153	5.72981	6.28185	13.4844	9.33195	0.123682	0.87222	0.964923
1700047G03Rik	0	5.26925	8.13461	11.4596	8.97407	31.0142	34.7827	2.75798	0.00328704	0.0360245
1700048M11Rik	2.70403	7.02567	4.88077	3.81987	9.87147	6.74222	13.5738	0.885524	0.323482	NA
1700048O20Rik	4.05604	5.26925	17.0827	5.72981	12.5637	21.5751	32.2377	1.27097	0.10961	0.373768
1700049G17Rik	260.939	189.693	190.35	198.633	186.661	173.949	194.274	-0.15513	0.418179	0.73308
1700052K11Rik	50.0245	61.4746	54.5019	45.8385	61.9211	57.9831	70.4138	0.0951429	0.766608	0.929269
1700056E22Rik	5.40805	6.14746	3.25384	7.63974	8.97407	18.8782	10.1803	1.21329	0.121075	0.396923
1700061G19Rik	8.11208	7.02567	11.3885	4.77484	3.58963	4.04533	5.09016	-0.995418	0.243304	NA
1700065J18Rik	0	0.878209	3.25384	2.8649	4.48703	0	7.63524	1.84499	0.249084	NA
1700066B19Rik	4.05604	7.02567	12.2019	9.54968	1.79481	16.1813	3.39344	0.0427139	0.965798	NA
1700066M21Rik	86.5288	88.6991	114.698	126.056	123.842	117.315	167.127	0.473431	0.0442744	0.218099
1700067K01Rik	6.76007	0.878209	8.94807	7.63974	12.5637	8.09066	8.48359	1.25092	0.165354	NA
1700071M16Rik	20.2802	21.9552	21.9634	22.9192	24.23	37.7564	31.3893	0.428242	0.351817	0.68127
1700073E17Rik	5.40805	0	0	0	5.38444	0	5.09016	2.58146	0.273003	NA
1700084E18Rik	2.70403	1.75642	6.50769	0	5.38444	0	4.2418	-0.34595	0.832172	NA
1700084J12Rik	5.40805	7.02567	5.69423	9.54968	5.38444	14.8329	5.09016	0.484646	0.56393	NA
1700086O06Rik	51.3765	43.0322	31.725	25.7841	41.2807	53.9378	44.1147	-0.0122691	0.974366	0.994225
1700088E04Rik	5.40805	8.78209	6.50769	0.954968	1.79481	10.7876	1.69672	-1.14894	0.308899	NA
1700092M07Rik	9.46409	3.51283	8.13461	0	0	8.09066	4.2418	-1.13678	0.430162	NA
1700093K21Rik	5.40805	1.75642	3.25384	1.90994	1.79481	0	1.69672	-1.17731	0.42572	NA
1700094D03Rik	123.033	64.1092	70.7711	57.2981	91.5355	72.816	59.3852	-0.226498	0.421281	0.736081
1700095J12Rik	22.9842	8.78209	22.7769	4.77484	12.5637	12.136	6.78688	-0.913598	0.180212	0.497366
1700096K18Rik	5.40805	33.3719	11.3885	19.0994	19.7429	24.272	28.8442	0.808785	0.126053	0.405789
1700099I09Rik	21.6322	7.90388	31.725	8.59471	13.4611	8.09066	8.48359	-0.849558	0.180547	0.497789
1700101E01Rik	0	1.75642	3.25384	1.90994	2.69222	5.39378	5.09016	1.52425	0.280905	NA
1700102H20Rik	2.70403	0	7.32115	0	2.69222	5.39378	1.69672	0.589686	0.731027	NA
1700102P08Rik	1.35201	13.1731	5.69423	2.8649	10.7689	2.69689	3.39344	-0.063907	0.951714	NA
1700105P06Rik	17.5762	4.39104	0.813461	0	5.38444	0	3.39344	-0.84976	0.56199	NA
1700108J01Rik	5.40805	5.26925	4.88077	0.954968	3.58963	0	4.2418	-1.21368	0.352705	NA
1700109H08Rik	64.8966	42.154	50.4346	30.559	30.5118	39.1049	27.9959	-0.692979	0.0518352	0.239661
1700109K24Rik	86.5288	51.8143	61.823	58.253	70.8951	57.9831	58.5368	-0.0724489	0.803838	0.941918
1700110C19Rik	5.40805	7.02567	3.25384	3.81987	11.6663	5.39378	7.63524	0.507023	0.570951	NA
1700110K17Rik	8.11208	1.75642	1.62692	0	8.07666	6.74222	3.39344	0.495565	0.69038	NA
1700112E06Rik	24.3362	21.9552	17.0827	23.8742	10.7689	4.04533	10.1803	-0.827921	0.230191	0.560021
1700112J16Rik	0	6.14746	7.32115	7.63974	5.38444	5.39378	5.09016	1.05355	0.340585	NA
1700113A16Rik	82.4728	65.8656	74.8384	34.3788	76.2796	45.8471	40.7213	-0.601408	0.101666	0.360023
1700119H24Rik	17.5762	3.51283	5.69423	4.77484	10.7689	6.74222	0.848359	-0.407306	0.663305	NA
1700120C14Rik	2.70403	2.63463	8.13461	0.954968	7.17925	8.09066	2.54508	0.0640248	0.956371	NA
1700120E14Rik	22.9842	11.4167	22.7769	2.8649	3.58963	4.04533	11.877	-1.70951	0.0279224	0.162054
1700120K04Rik	8.11208	8.78209	2.44038	14.3245	7.17925	8.09066	5.93852	0.637151	0.456362	NA
1700123I01Rik	2.70403	1.75642	4.06731	0	0	2.69689	3.39344	-0.843989	0.635319	NA
1700123L14Rik	0	0	0	1.90994	8.97407	0	0.848359	3.92657	0.120135	NA
1700123M08Rik	22.9842	21.9552	8.94807	14.3245	13.4611	8.09066	13.5738	-0.411782	0.508517	0.796831
1700123O20Rik	167.65	148.417	195.231	211.048	144.482	164.51	267.233	0.195829	0.395675	0.717668
1700124L16Rik	0	1.75642	0.813461	0	1.79481	5.39378	3.39344	1.73874	0.356954	NA
1700125H03Rik	4.05604	0.878209	1.62692	10.5046	4.48703	2.69689	1.69672	1.44969	0.255459	NA
1810006J02Rik	6.76007	2.63463	1.62692	5.72981	1.79481	1.34844	2.54508	-0.164164	0.895709	NA
1810009A15Rik	9.46409	6.14746	4.88077	11.4596	6.28185	13.4844	16.1188	0.847257	0.262703	0.597267
1810010D01Rik	10.8161	7.90388	9.76153	4.77484	8.97407	5.39378	5.09016	-0.634914	0.424451	NA
1810010H24Rik	13.5201	21.077	10.575	15.2795	43.9729	17.5298	22.9057	0.762323	0.182638	0.50113
1810011H11Rik	75.7127	25.468	47.1807	30.559	43.9729	43.1502	41.5696	-0.155182	0.66656	0.886398
1810011O10Rik	862.584	652.509	806.14	510.908	496.266	435.547	620.151	-0.573259	0.000323025	0.00575587
1810012K16Rik	1.35201	0	0.813461	6.68477	1.79481	6.74222	3.39344	3.05965	0.0427219	NA
1810013A23Rik	18.9282	11.4167	8.13461	4.77484	8.97407	9.43911	1.69672	-1.08499	0.165851	0.475232
1810013L24Rik	707.103	727.157	659.717	622.639	693.695	667.48	670.204	-0.0722779	0.561586	0.830628
1810014B01Rik	44.6164	44.7886	43.1134	57.2981	68.2029	37.7564	45.8114	0.250229	0.493282	0.787428
1810019D21Rik	101.401	66.7439	69.9576	63.9828	52.947	67.4222	54.295	-0.380758	0.183972	0.502901
1810021B22Rik	20.2802	8.78209	0.813461	12.4146	5.38444	9.43911	17.8155	0.832329	0.372016	0.69648
1810022K09Rik	109.513	116.802	166.76	139.425	118.458	87.6489	173.065	-0.0127202	0.957258	0.988858
1810024B03Rik	1.35201	7.90388	4.06731	4.77484	1.79481	4.04533	0.848359	-0.371965	0.764179	NA
1810026B05Rik	663.838	428.566	505.973	347.608	498.958	524.545	446.237	-0.205922	0.230208	0.560021
1810026J23Rik	308.259	396.072	382.327	337.104	414.602	329.02	359.704	-0.00509713	0.975724	0.994989
1810030O07Rik	363.692	392.559	390.461	396.312	384.987	387.003	416.544	0.0509546	0.719361	0.909652
1810032O08Rik	194.69	129.975	152.931	112.686	125.637	109.224	116.225	-0.425332	0.0455274	0.221696
1810034E14Rik	31.0963	21.9552	37.4192	13.3695	34.1014	25.6204	24.6024	-0.281238	0.576326	0.838974
1810037I17Rik	205.506	250.289	256.24	190.994	178.584	202.267	242.631	-0.222054	0.241416	0.57426
1810041H14Rik	0	2.63463	8.13461	1.90994	4.48703	2.69689	2.54508	0.495272	0.722681	NA
1810041L15Rik	0	1.75642	3.25384	3.81987	3.58963	2.69689	1.69672	1.23218	0.40579	NA
1810043G02Rik	242.01	118.558	226.142	193.858	101.407	172.601	169.672	-0.227384	0.357193	0.684066
1810043H04Rik	17.5762	43.9104	30.9115	29.604	32.3066	22.9235	47.5081	0.173887	0.679654	0.89261
1810044D09Rik	10.8161	7.02567	4.06731	1.90994	14.3585	5.39378	13.5738	0.39836	0.667539	NA
1810046K07Rik	2.70403	3.51283	4.06731	1.90994	0.897407	2.69689	0	-1.41297	0.358721	NA
1810055G02Rik	47.3205	139.635	104.123	158.525	131.919	141.587	127.254	0.630984	0.0124136	0.0934469
1810058I24Rik	193.338	191.449	174.081	163.299	258.453	233.281	258.75	0.293804	0.191528	0.513466
1810062G17Rik	13.5201	5.26925	14.6423	20.0543	21.5378	10.7876	26.2991	0.968284	0.104742	0.364522
1810062O18Rik	10.8161	5.26925	0	7.63974	3.58963	4.04533	3.39344	0.725875	0.546461	NA
1810064F22Rik	12.1681	6.14746	6.50769	5.72981	5.38444	1.34844	5.09016	-0.814751	0.380295	NA
2010001A14Rik	25.6882	17.5642	9.76153	15.2795	7.17925	16.1813	7.63524	-0.515118	0.424876	0.738672
2010001E11Rik	6.76007	3.51283	4.88077	0	0	5.39378	8.48359	-0.497326	0.745408	NA
2010003K11Rik	21.6322	42.154	21.15	43.9285	66.4081	39.1049	78.8974	1.08024	0.0086595	0.0721867
2010009K17Rik	4.05604	7.02567	4.06731	0.954968	5.38444	1.34844	5.93852	-0.511398	0.658033	NA
2010010A06Rik	2.70403	2.63463	0	0	1.79481	0	4.2418	0.557022	0.804611	NA
2010012O05Rik	63.5446	86.9427	87.8538	102.182	94.2277	101.133	147.615	0.488012	0.0639241	0.272615
2010016I18Rik	75.7127	26.3463	43.1134	8.59471	17.9481	36.408	25.4508	-1.0116	0.0503838	0.235193
2010106C02Rik	14.8721	6.14746	15.4558	0	13.4611	14.8329	4.2418	-0.733722	0.476801	0.778052
2010107E04Rik	169.002	271.366	315.623	280.761	351.783	203.615	375.823	0.29459	0.188952	0.509735
2010107G12Rik	6.76007	5.26925	3.25384	2.8649	1.79481	5.39378	1.69672	-0.79686	0.468025	NA
2010107G23Rik	70.3047	50.9361	59.3827	44.8835	33.204	32.3627	40.7213	-0.653763	0.0552407	0.248193
2010109A12Rik	10.8161	3.51283	6.50769	5.72981	8.07666	5.39378	4.2418	-0.0827501	0.92313	NA
2010109I03Rik	4.05604	1.75642	4.88077	1.90994	2.69222	2.69689	1.69672	-0.555604	0.653838	NA
2010111I01Rik	1516.96	776.336	965.578	761.109	938.687	912.897	897.564	-0.236162	0.0843953	0.322129
2010204K13Rik	6.76007	12.2949	8.13461	12.4146	8.07666	8.09066	6.78688	-0.000482962	0.999478	0.999727
2010300C02Rik	386.676	218.674	366.871	239.697	201.019	222.493	160.34	-0.605609	0.00233553	0.0279831
2010310C07Rik	1.35201	7.02567	6.50769	1.90994	8.97407	4.04533	1.69672	-0.147821	0.898714	NA
2010315B03Rik	459.684	308.251	430.321	319.914	341.014	283.173	351.221	-0.271457	0.0923529	0.339965
2010320M18Rik	59.4886	43.0322	61.0096	56.3431	50.2548	43.1502	57.6884	-0.047935	0.878502	0.967543
2200002D01Rik	18.9282	23.7116	38.2327	18.1444	17.0507	24.272	33.086	-0.183885	0.703875	0.903329
2210013O21Rik	101.401	111.532	101.683	137.515	123.842	122.708	127.254	0.286347	0.19571	0.518128
2210015D19Rik	66.2486	63.231	66.7038	76.3974	59.2288	60.68	102.651	0.181098	0.562473	0.831112
2210016F16Rik	242.01	326.694	300.981	336.149	295.247	280.476	354.614	0.129722	0.413514	0.729559
2210016L21Rik	147.369	154.565	168.386	149.93	144.482	146.98	171.369	-0.0332765	0.867365	0.964816
2210018M11Rik	567.845	442.617	430.321	469.844	438.832	481.395	409.758	-0.0786082	0.580788	0.840887
2210039B01Rik	17.5762	7.02567	4.06731	5.72981	0.897407	2.69689	0	-1.79642	0.143065	NA
2210404O09Rik	58.1366	57.9618	80.5326	68.7577	70.8951	59.3315	85.6843	0.132696	0.642012	0.874337
2210406O10Rik	9.46409	7.90388	6.50769	5.72981	5.38444	8.09066	4.2418	-0.448527	0.583594	NA
2210408F21Rik	77.0647	43.9104	56.1288	41.0636	56.5366	39.1049	58.5368	-0.213777	0.537251	0.814694
2210408I21Rik	201.45	120.315	140.729	150.885	161.533	142.935	183.246	0.100295	0.649856	0.877911
2210416O15Rik	6.76007	12.2949	6.50769	6.68477	10.7689	14.8329	5.93852	0.13781	0.851473	0.960147
2300009A05Rik	10.8161	28.9809	22.7769	29.604	34.1014	22.9235	30.5409	0.577636	0.206273	0.530514
2310001H17Rik	74.3607	14.9295	74.025	29.604	34.9989	31.0142	16.1188	-0.637962	0.152067	0.452604
2310002F09Rik	2.70403	8.78209	3.25384	0	1.79481	2.69689	11.0287	-0.265112	0.843892	NA
2310002L09Rik	24.3362	19.3206	22.7769	0	69.1003	2.69689	38.1762	0.296874	0.872112	0.964923
2310007B03Rik	5.40805	4.39104	3.25384	7.63974	0	8.09066	1.69672	0.00394149	0.997599	NA
2310009A05Rik	54.0805	78.1606	74.8384	76.3974	62.8185	82.2551	60.2335	0.0299134	0.920592	0.978323
2310009B15Rik	18.9282	22.8334	25.2173	19.0994	26.9222	26.9689	22.0573	0.0779583	0.868705	0.964824
2310010G23Rik	4.05604	1.75642	5.69423	3.81987	9.87147	9.43911	7.63524	1.1152	0.240877	NA
2310010J17Rik	28.3923	25.468	13.8288	29.604	31.4092	16.1813	14.4221	0.0967405	0.857349	0.962026
2310011J03Rik	177.114	201.11	249.733	213.913	192.045	156.42	186.639	-0.152069	0.426205	0.739447
2310015A10Rik	319.075	202.866	223.702	198.633	267.427	265.643	234.996	-0.00815336	0.963843	0.990308
2310015D24Rik	8.11208	5.26925	8.13461	0	12.5637	1.34844	8.48359	-0.309902	0.801725	NA
2310016D03Rik	0	0	0.813461	0	6.28185	0	1.69672	2.65812	0.345167	NA
2310020H05Rik	1.35201	0	1.62692	0	3.58963	0	2.54508	1.23079	0.603076	NA
2310022A10Rik	131.145	82.5516	79.7192	58.253	82.5614	68.7706	61.9302	-0.48134	0.071392	0.291912
2310022B05Rik	233.898	280.149	200.111	256.886	297.939	339.808	194.274	0.182094	0.363286	0.688903
2310030G06Rik	98.697	90.4555	60.1961	79.2623	68.2029	74.1644	52.5983	-0.246768	0.40107	0.722019
2310033P09Rik	89.2329	111.532	104.936	98.3617	96.0225	122.708	72.1106	-0.0823162	0.766894	0.929314
2310034G01Rik	41.9124	20.1988	30.0981	15.2795	14.3585	8.09066	14.4221	-1.14801	0.0263873	0.156073
2310035C23Rik	1066.74	688.516	798.005	638.873	657.799	780.749	652.388	-0.288944	0.0252899	0.152099
2310036O22Rik	235.25	306.495	276.577	275.031	279.093	307.445	312.196	0.106321	0.514858	0.801158
2310039H08Rik	31.0963	69.3785	56.9423	63.0279	75.3821	43.1502	81.4425	0.382984	0.245839	0.579023
2310040G24Rik	6.76007	21.077	10.575	10.5046	28.717	14.8329	34.7827	0.927747	0.142611	0.435469
2310045N01Rik	255.53	288.931	309.115	260.706	269.222	230.584	302.864	-0.0967954	0.56654	0.833262
2310047M10Rik	62.1926	80.7952	58.5692	80.2173	78.9718	75.5129	108.59	0.363654	0.208279	0.533219
2310057M21Rik	68.9527	76.4041	85.4134	65.8928	74.4847	66.0738	60.2335	-0.207399	0.463261	0.768835
2310061I04Rik	104.105	79.917	38.2327	55.3881	80.7666	95.7395	65.3237	0.0977108	0.725077	0.912545
2310065F04Rik	8.11208	8.78209	13.0154	0	11.6663	0	32.2377	-0.0819228	0.96992	0.992181
2310067B10Rik	727.383	594.547	520.615	504.223	489.984	542.075	481.02	-0.266824	0.0499121	0.234312
2310068J16Rik	2.70403	0	1.62692	1.90994	0	0	4.2418	0.108124	0.960822	NA
2310069B03Rik	0	14.0513	1.62692	3.81987	5.38444	0	3.39344	0.74139	0.595522	NA
2310075C17Rik	2.70403	2.63463	0	0	5.38444	0	3.39344	1.06306	0.608934	NA
2400006E01Rik	28.3923	1.75642	9.76153	0.954968	1.79481	2.69689	4.2418	-1.61408	0.10714	NA
2410002F23Rik	642.206	399.585	452.284	420.186	415.499	473.304	390.245	-0.193031	0.16317	0.47087
2410004B18Rik	77.0647	122.071	96.8019	84.9921	104.099	82.2551	102.651	-0.0592141	0.812718	0.945429
2410004P03Rik	0	1.75642	0	5.72981	1.79481	5.39378	3.39344	3.2777	0.0477632	NA
2410006H16Rik	178.466	269.61	349.788	342.833	214.48	217.099	240.934	-0.0387586	0.848307	0.959373
2410015M20Rik	143.313	279.27	283.898	306.545	250.376	203.615	338.495	0.257414	0.132463	0.417225
2410016O06Rik	108.161	123.827	133.408	87.857	95.1251	74.1644	100.106	-0.443243	0.0662421	0.278673
2410017I17Rik	0	0	0.813461	6.68477	3.58963	4.04533	4.2418	3.79414	0.0190714	NA
2410021H03Rik	2.70403	3.51283	5.69423	4.77484	8.07666	9.43911	2.54508	0.573696	0.569337	NA
2410089E03Rik	1015.36	751.747	713.405	648.423	833.691	879.186	631.179	-0.134349	0.304209	0.635326
2410127L17Rik	44.6164	76.4041	74.8384	89.767	93.3303	66.0738	90.7745	0.408425	0.143285	0.436118
2410131K14Rik	137.905	144.026	166.76	133.695	113.073	140.238	156.947	-0.138474	0.525694	0.807624
2500002B13Rik	6.76007	12.2949	6.50769	11.4596	12.5637	4.04533	5.93852	0.0681374	0.932748	0.981409
2500004C02Rik	40.5604	42.154	50.4346	59.208	64.6133	67.4222	50.0532	0.4344	0.185464	0.50452
2510002D24Rik	113.569	91.3337	130.154	70.6676	94.2277	83.6035	78.8974	-0.4339	0.0997824	0.356485
2510003B16Rik	13.5201	1.75642	9.76153	4.77484	3.58963	6.74222	4.2418	-0.343991	0.702249	NA
2510009E07Rik	388.028	526.047	405.104	542.422	523.188	535.332	616.757	0.341741	0.017019	0.115566
2510039O18Rik	340.707	388.168	366.057	389.627	321.272	300.703	370.733	-0.0821044	0.611385	0.857751
2610001J05Rik	81.1208	90.4555	132.594	120.326	131.021	151.026	180.701	0.546063	0.0331278	0.1814
2610002M06Rik	263.643	350.405	404.29	399.177	336.527	347.899	349.524	0.0893995	0.576424	0.838974
2610005L07Rik	121.681	82.5516	91.9211	77.3524	113.971	84.952	87.381	-0.0902329	0.731887	0.914522
2610008E11Rik	738.199	536.585	532.817	496.583	581.519	563.65	541.253	-0.119139	0.374023	0.697725
2610015P09Rik	344.763	165.103	178.961	133.695	172.302	200.918	118.77	-0.483602	0.0119404	0.0908482
2610016A17Rik	28.3923	50.0579	37.4192	36.2888	75.3821	57.9831	136.586	0.994797	0.0298531	0.169444
2610020C07Rik	47.3205	46.5451	54.5019	45.8385	43.9729	44.4987	50.9016	-0.0925529	0.775741	0.933366
2610020H08Rik	216.322	93.0901	152.931	100.272	148.072	126.754	106.893	-0.262758	0.264263	0.598449
2610027K06Rik	33.8003	18.4424	18.7096	17.1894	23.3326	28.3173	15.2705	-0.133904	0.776471	0.933366
2610028E06Rik	0	0	0	0	1.79481	2.69689	5.09016	3.73186	0.152823	NA
2610035D17Rik	62.1926	53.5707	44.7404	65.8928	69.9977	93.0426	57.6884	0.418486	0.1591	0.464431
2610037D02Rik	8.11208	4.39104	0	0	0	0	0	-3.37346	0.196165	NA
2610042L04Rik	2.70403	7.02567	0.813461	4.77484	0	2.69689	2.54508	-0.118596	0.93617	NA
2610044O15Rik8	178.466	132.61	112.258	129.876	131.919	128.102	128.951	-0.0850252	0.695608	0.899171
2610203C22Rik	31.0963	16.686	31.725	39.1537	52.0496	25.6204	44.1147	0.680919	0.114657	0.383785
2610206C17Rik	0	4.39104	2.44038	0	2.69222	5.39378	4.2418	0.918029	0.572002	NA
2610301B20Rik	90.5849	146.661	116.325	148.975	121.15	142.935	137.434	0.238879	0.280666	0.613959
2610305D13Rik	71.6567	91.3337	61.823	89.767	139.098	153.723	141.676	0.810247	0.00234667	0.0280715
2610306M01Rik	12.1681	32.4937	34.9788	32.4689	36.7937	28.3173	33.086	0.399516	0.357523	0.684066
2610307P16Rik	377.212	447.008	241.598	273.121	369.731	343.853	229.057	-0.200806	0.226463	0.555718
2610316D01Rik	2.70403	1.75642	0	1.90994	0	1.34844	2.54508	0.584275	0.774028	NA
2610318N02Rik	0	2.63463	3.25384	0	1.79481	2.69689	3.39344	0.447382	0.801306	NA
2610507B11Rik	4648.22	4240.87	4296.7	3966.94	4233.96	4108.71	4291	-0.0796015	0.426763	0.739847
2610507I01Rik	397.492	194.084	247.292	220.598	217.172	245.417	213.787	-0.239864	0.152929	0.453434
2610524H06Rik	18.9282	80.7952	72.398	77.3524	61.0236	67.4222	61.9302	0.416853	0.225218	0.553574
2610528A11Rik	14.8721	1.75642	9.76153	1.90994	1.79481	0	3.39344	-1.8027	0.1241	NA
2610528J11Rik	32.4483	11.4167	34.1654	30.559	36.7937	17.5298	6.78688	-0.0280969	0.964687	0.990313
2700029M09Rik	158.186	185.302	267.629	241.607	174.097	160.465	173.065	-0.0995376	0.634313	0.870173
2700038G22Rik	85.1768	42.154	61.823	41.0636	33.204	39.1049	47.5081	-0.575714	0.087936	0.330231
2700046A07Rik	2.70403	5.26925	0.813461	5.72981	3.58963	10.7876	3.39344	1.2642	0.250914	NA
2700046G09Rik	55.4325	20.1988	32.5384	29.604	40.3833	45.8471	28.8442	0.119708	0.754392	0.924374
2700049A03Rik	580.014	351.283	379.073	307.5	357.168	343.853	302.864	-0.368921	0.0111654	0.0864519
2700054A10Rik	29.7443	66.7439	38.2327	29.604	42.1781	52.5893	38.1762	-0.102452	0.780527	0.935124
2700060E02Rik	417.772	743.843	788.244	892.895	684.721	635.117	961.191	0.311691	0.0129006	0.0956157
2700062C07Rik	78.4168	86.9427	109.004	81.1723	74.4847	76.8613	113.68	-0.076686	0.773512	0.932581
2700069I18Rik	4.05604	3.51283	2.44038	1.90994	0	1.34844	0	-2.06028	0.257221	NA
2700081O15Rik	485.373	411.88	290.406	320.869	342.809	492.182	396.184	-0.000161389	0.999313	0.999648
2700094K13Rik	60.8406	94.8465	95.9884	124.146	110.381	83.6035	83.9876	0.280861	0.321589	0.650879
2700097O09Rik	63.5446	42.154	46.3673	44.8835	44.8703	53.9378	40.7213	-0.113661	0.726767	0.912933
2700099C18Rik	50.0245	32.4937	50.4346	64.9378	48.46	75.5129	40.7213	0.39041	0.283866	0.616759
2810001G20Rik	77.0647	46.5451	65.8903	54.4332	40.3833	62.0284	36.4795	-0.361563	0.287828	0.619685
2810002D19Rik	36.5044	40.3976	47.1807	63.9828	61.0236	72.816	61.0819	0.64103	0.0436413	0.216104
2810004N23Rik	331.243	302.104	291.219	297.95	261.145	217.099	288.442	-0.208635	0.264008	0.598387
2810006K23Rik	63.5446	81.6734	72.398	93.5868	87.0484	90.3458	78.0491	0.265936	0.313527	0.642489
2810013P06Rik	144.665	122.071	91.9211	87.857	141.79	83.6035	100.955	-0.175087	0.527883	0.809121
2810021J22Rik	147.369	86.9427	126.086	138.47	113.971	134.844	111.135	0.0925154	0.680057	0.89272
2810025M15Rik	60.8406	89.5773	74.8384	95.4968	68.2029	91.6942	100.955	0.251733	0.361134	0.686831
2810029C07Rik	10.8161	4.39104	9.76153	13.3695	8.07666	8.09066	11.0287	0.395785	0.577897	0.839373
2810032G03Rik	9.46409	10.5385	20.3365	8.59471	4.48703	12.136	12.7254	-0.456755	0.515334	0.801158
2810047C21Rik1	5.40805	3.51283	3.25384	1.90994	1.79481	5.39378	3.39344	-0.3688	0.745026	NA
2810403A07Rik	1274.95	783.362	936.294	901.49	770.872	965.486	873.81	-0.146719	0.282796	0.616149
2810403D21Rik	10.8161	12.2949	27.6577	20.0543	18.8455	18.8782	12.7254	0.154572	0.78917	0.937482
2810408A11Rik	78.4168	36.8848	39.8596	85.9471	43.9729	45.8471	39.8729	0.149396	0.713742	0.907427
2810408I11Rik	0	0.878209	14.6423	17.1894	1.79481	0	3.39344	1.18831	0.373351	NA
2810410L24Rik	83.8248	43.0322	27.6577	28.649	43.9729	39.1049	31.3893	-0.376556	0.290606	0.622547
2810417H13Rik	112.217	237.116	291.219	372.437	247.684	291.264	192.578	0.464535	0.104293	0.364308
2810428I15Rik	73.0087	103.629	113.071	72.5776	87.9458	146.98	101.803	0.0769778	0.813149	0.94547
2810429I04Rik	9.46409	16.686	16.2692	16.2345	8.07666	2.69689	5.93852	-0.786411	0.306724	0.637565
2810433D01Rik	2.70403	20.1988	18.7096	23.8742	14.3585	13.4844	18.6639	0.669152	0.269156	0.603494
2810442N19Rik	13.5201	15.8078	13.8288	10.5046	8.97407	8.09066	0.848359	-1.05	0.216607	0.542343
2810454H06Rik	21.6322	35.1283	16.2692	22.9192	34.9989	59.3315	39.0245	0.709384	0.108594	0.371523
2810459M11Rik	196.042	37.763	254.613	81.1723	62.8185	79.5582	37.3278	-0.918235	0.0101632	0.0811418
2810468N07Rik	59.4886	36.8848	76.4653	62.0729	55.6392	57.9831	61.9302	0.107314	0.720809	0.910209
2810474O19Rik	1868.48	1367.37	1401.59	1145.96	1224.06	1030.21	1078.26	-0.442559	0.000596338	0.00943569
2900005J15Rik	110.865	55.3271	67.5173	53.4782	58.3314	67.4222	52.5983	-0.356248	0.205244	0.529818
2900008C10Rik	0	7.90388	11.3885	8.59471	15.2559	16.1813	9.33195	1.50034	0.108479	0.371402
2900009J06Rik	2.70403	0.878209	0.813461	2.8649	0.897407	0	2.54508	0.135779	0.939511	NA
2900011O08Rik	0	6.14746	1.62692	1.90994	16.1533	10.7876	10.1803	2.56553	0.0323296	NA
2900026A02Rik	923.425	829.907	637.753	649.378	700.874	768.613	478.475	-0.28982	0.0590911	0.259045
2900041M22Rik	2.70403	5.26925	3.25384	5.72981	2.69222	0	5.09016	-0.251156	0.842379	NA
2900057B20Rik	25.6882	33.3719	25.2173	12.4146	26.0248	25.6204	15.2705	-0.545643	0.264831	0.599016
2900060B14Rik	8.11208	10.5385	25.2173	9.54968	17.9481	13.4844	13.5738	0.0379201	0.953753	0.987338
2900076A07Rik	79.7688	46.5451	63.45	56.3431	55.6392	74.1644	72.9589	0.0777605	0.799504	0.940229
2900097C17Rik	1737.34	1821.4	1595.2	1813.48	1797.51	1689.6	1859.6	0.0609044	0.590917	0.846719
3000002C10Rik	63.5446	22.8334	41.4865	40.1086	26.9222	21.5751	31.3893	-0.370746	0.36061	0.686423
3010001F23Rik	6.76007	5.26925	2.44038	6.68477	6.28185	10.7876	2.54508	0.491161	0.59495	NA
3010026O09Rik	51.3765	28.9809	51.248	73.5325	42.1781	66.0738	49.2048	0.444043	0.207907	0.532542
3110001I22Rik	137.905	74.6477	54.5019	58.253	60.1262	62.0284	55.9917	-0.468197	0.109055	0.372386
3110002H16Rik	294.739	306.495	310.742	259.751	277.299	285.87	371.581	-0.0275973	0.884337	0.969296
3110009E18Rik	10.8161	12.2949	31.725	13.3695	11.6663	14.8329	19.5123	-0.167394	0.768644	0.930224
3110021A11Rik	2.70403	8.78209	4.88077	0.954968	9.87147	0	8.48359	-0.0496225	0.969064	NA
3110021N24Rik	48.6725	43.9104	56.1288	39.1537	37.6911	45.8471	37.3278	-0.310217	0.368062	0.692983
3110035E14Rik	5.40805	14.0513	19.5231	9.54968	16.1533	20.2267	19.5123	0.442445	0.494403	0.78779
3110039I08Rik	493.485	433.835	427.881	434.51	718.823	759.174	611.667	0.470156	0.0148229	0.104858
3110040N11Rik	55.4325	86.0644	104.123	105.046	98.7147	62.0284	107.742	0.217245	0.423599	0.737673
3110043O21Rik	467.797	519.021	353.042	381.032	419.986	513.757	629.483	0.137603	0.528495	0.809121
3110045C21Rik	8.11208	7.02567	9.76153	8.59471	12.5637	9.43911	19.5123	0.609971	0.385795	0.7088
3110052M02Rik	129.793	106.263	123.646	83.0822	126.534	120.012	151.856	0.0163567	0.953284	0.986998
3110056K07Rik	177.114	120.315	117.952	106.001	98.7147	106.527	111.135	-0.353934	0.123613	0.40088
3110057O12Rik	94.6409	57.9618	86.2269	56.3431	83.4588	98.4364	87.381	0.0633611	0.835709	0.954701
3110062M04Rik	70.3047	43.0322	52.875	48.7034	43.9729	48.544	70.4138	-0.0272834	0.93713	0.983036
3110070M22Rik	13.5201	3.51283	3.25384	0	1.79481	1.34844	4.2418	-1.46439	0.264694	NA
3110079O15Rik	0	50.9361	4.88077	6.68477	4.48703	6.74222	15.2705	0.814938	0.34533	0.674175
3110082I17Rik	29.7443	60.5964	69.1442	68.7577	37.6911	53.9378	58.5368	0.0912116	0.787355	0.936725
3200001D21Rik	22.9842	13.1731	21.15	9.54968	15.2559	16.1813	8.48359	-0.61921	0.292395	0.62384
3300002I08Rik	12.1681	22.8334	16.2692	15.2795	14.3585	9.43911	24.6024	-0.0830469	0.885342	0.969408
3300002P13Rik	0	0	4.88077	0	6.28185	0	13.5738	2.94718	0.418397	NA
3300005D01Rik	2.70403	5.26925	0.813461	2.8649	0	1.34844	1.69672	-0.741616	0.648443	NA
3425401B19Rik	128.441	112.411	170.827	13.3695	531.265	10.7876	181.549	0.387497	0.796864	0.939434
3632451O06Rik	35.1523	21.077	33.3519	53.4782	54.7418	35.0595	45.8114	0.71333	0.0595598	0.260563
3632454L22Rik	20.2802	20.1988	30.0981	11.4596	21.5378	17.5298	11.0287	-0.622119	0.26747	0.602212
3830403N18Rik	0	0	3.25384	1.90994	1.79481	0	6.78688	1.96085	0.310188	NA
3830406C13Rik	258.234	258.193	206.619	246.382	246.787	204.963	314.741	0.0768994	0.724461	0.912078
3830408C21Rik	24.3362	9.66029	17.8961	17.1894	12.5637	10.7876	12.7254	-0.259415	0.648785	0.877507
3830417A13Rik	2.70403	1.75642	1.62692	0	3.58963	5.39378	1.69672	0.168956	0.909895	NA
3830432H09Rik	0	5.26925	6.50769	6.68477	3.58963	12.136	1.69672	1.15122	0.363045	NA
3930402G23Rik	2.70403	5.26925	3.25384	1.90994	8.07666	9.43911	8.48359	0.895061	0.367138	NA
4430402I18Rik	36.5044	21.077	20.3365	19.0994	24.23	13.4844	47.5081	0.0446651	0.938263	0.983461
4631405J19Rik	14.8721	6.14746	11.3885	12.4146	8.97407	14.8329	11.0287	0.225897	0.728115	0.913563
4632404H12Rik	117.625	45.6668	78.0923	46.7934	51.1522	43.1502	64.4753	-0.515259	0.107642	0.370066
4632415L05Rik	266.347	227.456	242.411	223.462	186.661	168.556	255.356	-0.235921	0.255902	0.589433
4632427E13Rik	223.082	108.02	158.625	107.911	116.663	103.83	80.5941	-0.602734	0.00835312	0.0702218
4632428C04Rik	8.11208	12.2949	7.32115	3.81987	16.1533	9.43911	4.2418	-0.234584	0.771606	0.9317
4632428N05Rik	747.663	784.24	836.238	875.705	843.562	896.715	822.909	0.122269	0.324033	0.653172
4732416N19Rik	2.70403	0.878209	4.06731	0.954968	1.79481	5.39378	4.2418	0.497915	0.711087	NA
4732471J01Rik	194.69	77.2824	97.6153	73.5325	97.8173	59.3315	57.6884	-0.634694	0.0280008	0.162393
4732490B19Rik	37.8564	12.2949	13.0154	19.0994	10.7689	13.4844	5.09016	-0.5869	0.358192	0.684901
4732491K20Rik	32.4483	42.154	21.15	26.7391	36.7937	31.0142	32.2377	0.0424234	0.915695	0.977499
4831440E17Rik	64.8966	52.6925	78.0923	54.4332	69.9977	78.2098	59.3852	0.0116263	0.970407	0.992379
4833411C07Rik	6.76007	1.75642	16.2692	5.72981	5.38444	5.39378	6.78688	-0.0252733	0.976887	NA
4833412C05Rik	0	0	0.813461	2.8649	1.79481	2.69689	1.69672	2.78108	0.160371	NA
4833417C18Rik	13.5201	12.2949	17.8961	16.2345	8.97407	17.5298	10.1803	-0.142089	0.818477	0.948335
4833418N02Rik	28.3923	31.6155	31.725	20.0543	38.5885	33.7111	31.3893	0.000984784	0.99819	0.999531
4833419F23Rik	2.70403	8.78209	5.69423	6.68477	6.28185	4.04533	8.48359	0.283315	0.748205	NA
4833420G17Rik	678.711	524.291	558.848	382.942	629.979	585.225	410.606	-0.236415	0.204227	0.528493
4833422C13Rik	44.6164	25.468	25.2173	24.8292	45.7677	28.3173	30.5409	0.0925097	0.82744	0.95159
4833427F10Rik	2.70403	3.51283	4.88077	1.90994	7.17925	1.34844	4.2418	0.0321381	0.978285	NA
4833439L19Rik	613.814	910.702	697.136	859.471	931.508	860.307	1040.09	0.328693	0.0116439	0.0892762
4921504A21Rik	9.46409	3.51283	11.3885	8.59471	4.48703	4.04533	9.33195	-0.158832	0.845469	NA
4921506M07Rik	47.3205	65.8656	17.0827	24.8292	59.2288	49.8924	34.7827	0.101715	0.781425	0.935588
4921507L20Rik	40.5604	19.3206	28.4711	21.9643	20.6404	40.4533	27.1475	-0.0368666	0.935493	0.982107
4921507P07Rik	36.5044	28.9809	24.4038	29.604	28.717	17.5298	17.8155	-0.322329	0.493724	0.78756
4921511C10Rik	50.0245	18.4424	24.4038	20.0543	14.3585	55.2862	19.5123	-0.110527	0.837136	0.955253
4921511H03Rik	8.11208	7.02567	4.88077	2.8649	12.5637	9.43911	6.78688	0.211847	0.800217	NA
4921511I17Rik	16.2242	9.66029	13.0154	2.8649	17.0507	9.43911	10.1803	-0.383162	0.614745	0.859709
4921513I03Rik	8.11208	12.2949	8.94807	2.8649	9.87147	13.4844	5.93852	-0.391005	0.622526	0.863526
4921518K17Rik	37.8564	36.0066	23.5904	8.59471	33.204	20.2267	5.09016	-1.10667	0.0668277	0.280424
4921524J17Rik	77.0647	90.4555	69.9576	74.4875	111.278	67.4222	97.5613	0.15915	0.592649	0.847843
4921531C22Rik	45.9684	34.2501	41.4865	32.4689	46.6651	40.4533	55.9917	0.135513	0.721211	0.910369
4921534H16Rik	2.70403	1.75642	1.62692	0	3.58963	8.09066	5.93852	1.0929	0.43262	NA
4921536K21Rik	2.70403	3.51283	8.94807	0.954968	7.17925	4.04533	6.78688	0.0712064	0.948646	NA
4930402H24Rik	1188.42	1139.04	739.436	950.193	1179.19	1228.43	1204.67	0.188773	0.194108	0.517145
4930404I05Rik	28.3923	23.7116	26.0308	19.0994	25.1274	16.1813	17.8155	-0.399714	0.402656	0.722423
4930404N11Rik	54.0805	69.3785	91.1076	34.3788	63.7159	60.68	65.3237	-0.336108	0.354639	0.682894
4930405A10Rik	16.2242	0.878209	4.88077	2.8649	7.17925	8.09066	4.2418	0.395652	0.682625	NA
4930405A21Rik	2.70403	6.14746	4.88077	4.77484	13.4611	5.39378	7.63524	0.811764	0.375753	NA
4930405J17Rik	33.8003	8.78209	12.2019	7.63974	9.87147	1.34844	5.09016	-1.29411	0.0981162	0.353157
4930405O22Rik	58.1366	49.1797	54.5019	33.4239	42.1781	36.408	33.086	-0.568135	0.0992833	0.355658
4930412C18Rik	45.9684	47.4233	17.0827	38.1987	12.5637	6.74222	33.086	-0.746331	0.27134	0.605346
4930412O13Rik	358.283	275.758	274.95	212.003	323.066	339.808	192.578	-0.203516	0.325712	0.654757
4930413F20Rik	10.8161	5.26925	10.575	1.90994	10.7689	9.43911	7.63524	-0.220919	0.797637	NA
4930413G21Rik	1.35201	12.2949	19.5231	0.954968	3.58963	14.8329	6.78688	-0.353	0.745194	NA
4930414N06Rik	8.11208	4.39104	5.69423	2.8649	6.28185	2.69689	3.39344	-0.604555	0.540604	NA
4930415O20Rik	9.46409	8.78209	13.8288	10.5046	7.17925	6.74222	2.54508	-0.651913	0.424242	NA
4930419G24Rik	2.70403	3.51283	3.25384	0.954968	0	0	1.69672	-2.43247	0.186668	NA
4930425L21Rik	0	0	0	0.954968	5.38444	9.43911	2.54508	4.40392	0.016819	NA
4930426L09Rik	0	1.75642	0	1.90994	3.58963	2.69689	5.09016	2.98503	0.0808116	NA
4930427A07Rik	81.1208	102.75	151.304	177.624	85.2536	107.876	84.8359	0.052938	0.868092	0.964824
4930429B21Rik	2.70403	2.63463	4.88077	7.63974	5.38444	5.39378	3.39344	0.711802	0.483153	NA
4930429F24Rik	17.5762	19.3206	13.8288	18.1444	37.6911	14.8329	26.2991	0.542069	0.325145	0.654286
4930430F08Rik	39.2084	46.5451	48.8077	54.4332	61.0236	44.4987	78.0491	0.409469	0.225193	0.553574
4930430J02Rik	2.70403	0	2.44038	0.954968	1.79481	2.69689	2.54508	0.988591	0.547143	NA
4930431P03Rik	90.5849	26.3463	74.025	42.9736	33.204	17.5298	41.5696	-0.722375	0.0605505	0.263275
4930432K21Rik	22.9842	32.4937	34.1654	21.9643	22.4352	36.408	23.7541	-0.206741	0.649849	0.877911
4930438E09Rik	6.76007	10.5385	6.50769	14.3245	15.2559	17.5298	11.0287	0.882862	0.172653	0.486647
4930443O20Rik	18.9282	19.3206	17.8961	17.1894	20.6404	28.3173	21.209	0.205583	0.677115	0.891639
4930444P10Rik	2.70403	5.26925	0	0	0	0	6.78688	-0.975461	0.695134	NA
4930447A16Rik	39.2084	6.14746	8.94807	4.77484	0.897407	1.34844	1.69672	-2.55053	0.00763751	0.0659925
4930447C04Rik	2.70403	0.878209	0	1.90994	1.79481	4.04533	1.69672	1.60328	0.333193	NA
4930447F24Rik	2.70403	5.26925	2.44038	3.81987	1.79481	5.39378	5.09016	0.280654	0.800847	NA
4930447K03Rik	4.05604	0.878209	3.25384	4.77484	5.38444	2.69689	10.1803	1.3609	0.224971	NA
4930447M23Rik	5.40805	5.26925	0	13.3695	10.7689	13.4844	2.54508	2.16515	0.0460166	NA
4930447N08Rik	0	4.39104	3.25384	6.68477	4.48703	0	7.63524	1.37869	0.306561	NA
4930449E18Rik	10.8161	13.1731	5.69423	11.4596	9.87147	6.74222	6.78688	-0.0942525	0.898375	0.973555
4930451G09Rik	133.849	43.0322	134.221	68.7577	53.8444	63.3769	56.8401	-0.58677	0.0310794	0.173693
4930452B06Rik	32.4483	1.75642	19.5231	31.5139	1.79481	16.1813	7.63524	0.416339	0.628218	0.866556
4930453N24Rik	260.939	312.642	270.069	293.175	307.81	302.051	355.463	0.163578	0.322011	0.651055
4930455C13Rik	22.9842	12.2949	22.7769	4.77484	12.5637	10.7876	12.7254	-0.853783	0.185655	0.504684
4930455G09Rik	5.40805	1.75642	9.76153	6.68477	8.07666	6.74222	5.09016	0.525839	0.562963	NA
4930455H04Rik	2.70403	1.75642	3.25384	5.72981	2.69222	2.69689	1.69672	0.350743	0.776973	NA
4930465K10Rik	1.35201	1.75642	3.25384	2.8649	2.69222	10.7876	0	0.647769	0.663753	NA
4930471G03Rik	0	1.75642	6.50769	1.90994	1.79481	0	0	-0.618133	0.769747	NA
4930473A02Rik	22.9842	14.9295	20.3365	7.63974	9.87147	12.136	13.5738	-0.814819	0.170169	0.4822
4930474M22Rik	4.05604	0	4.06731	1.90994	0	2.69689	1.69672	0.148114	0.932447	NA
4930478L05Rik	39.2084	14.9295	22.7769	30.559	17.0507	24.272	23.7541	0.024949	0.95775	0.988934
4930479D17Rik	6.76007	5.26925	4.88077	3.81987	0	0	1.69672	-2.42404	0.110962	NA
4930480G23Rik	0	1.75642	0	0	0.897407	5.39378	3.39344	2.42435	0.267666	NA
4930480K23Rik	54.0805	66.7439	49.6211	42.9736	52.0496	62.0284	54.295	-0.10494	0.738482	0.917335
4930481A15Rik	143.313	49.1797	41.4865	42.9736	87.0484	60.68	53.4466	-0.116897	0.716725	0.908669
4930483K19Rik	2.70403	1.75642	7.32115	4.77484	3.58963	0	0	-0.659466	0.684518	NA
4930483O08Rik	8.11208	0	0.813461	0	3.58963	1.34844	1.69672	0.73263	0.683552	NA
4930486L24Rik	9.46409	0.878209	4.06731	5.72981	4.48703	2.69689	16.9672	1.17011	0.282954	NA
4930487H11Rik	21.6322	7.02567	9.76153	10.5046	17.0507	13.4844	12.7254	0.25769	0.67286	0.889301
4930488L21Rik	2.70403	12.2949	0	0	3.58963	5.39378	3.39344	0.474027	0.73754	NA
4930502A04Rik	0	5.26925	1.62692	0	0.897407	1.34844	0	-1.60629	0.48857	NA
4930502E09Rik	6.76007	0	1.62692	7.63974	1.79481	1.34844	4.2418	1.59526	0.248985	NA
4930503L19Rik	152.777	129.975	100.056	134.65	160.636	167.207	133.192	0.240969	0.235286	0.56664
4930505A04Rik	2.70403	0	6.50769	0.954968	0	0	1.69672	-1.27118	0.535871	NA
4930506A18Rik	4.05604	1.75642	4.06731	3.81987	17.0507	5.39378	10.1803	1.56871	0.11377	NA
4930506C21Rik	21.6322	8.78209	31.725	13.3695	17.0507	26.9689	16.1188	-0.0129744	0.981932	0.99694
4930507D05Rik	8.11208	8.78209	8.94807	4.77484	8.97407	10.7876	3.39344	-0.406501	0.619168	NA
4930511A08Rik	27.0403	6.14746	22.7769	14.3245	13.4611	9.43911	9.33195	-0.396323	0.505876	0.795115
4930511E03Rik	0	1.75642	0	0	3.58963	1.34844	8.48359	2.94504	0.149999	NA
4930511M06Rik	8.11208	1.75642	4.06731	0	7.17925	10.7876	5.93852	0.517838	0.660882	NA
4930512B01Rik	45.9684	31.6155	21.9634	27.6941	29.6144	59.3315	24.6024	0.100756	0.810246	0.944895
4930512J16Rik	9.46409	7.02567	6.50769	5.72981	8.07666	20.2267	7.63524	0.366329	0.632994	0.86963
4930513N10Rik	10.8161	14.0513	13.0154	20.0543	13.4611	6.74222	11.0287	0.0180748	0.978084	0.995936
4930515G01Rik	16.2242	5.26925	9.76153	9.54968	10.7689	9.43911	18.6639	0.391194	0.571692	0.836549
4930520O04Rik	71.6567	42.154	53.6884	36.2888	24.23	44.4987	52.5983	-0.464157	0.242199	0.575491
4930521E06Rik	21.6322	4.39104	6.50769	3.81987	14.3585	2.69689	13.5738	0.0914351	0.918519	0.97827
4930523C07Rik	297.443	250.289	195.231	273.121	239.608	242.72	262.143	0.0659314	0.734364	0.915734
4930525D18Rik	0	4.39104	0.813461	0	1.79481	2.69689	0.848359	0.150688	0.939391	NA
4930525G20Rik	50.0245	13.1731	27.6577	32.4689	34.9989	41.8018	38.1762	0.510982	0.197199	0.520128
4930526I15Rik	16.2242	21.9552	13.0154	14.3245	8.97407	24.272	15.2705	-0.110147	0.852923	0.960148
4930528A17Rik	9.46409	7.90388	11.3885	1.90994	11.6663	2.69689	2.54508	-1.07596	0.276213	NA
4930532I03Rik	0	0	0	2.8649	0.897407	2.69689	7.63524	4.18939	0.0376496	NA
4930533B01Rik	25.6882	8.78209	18.7096	9.54968	24.23	5.39378	11.877	-0.301008	0.663921	0.885525
4930538K18Rik	5.40805	0.878209	4.88077	2.8649	7.17925	0	5.09016	0.470152	0.724144	NA
4930539E08Rik	17.5762	1.75642	2.44038	24.8292	6.28185	8.09066	10.1803	1.50679	0.097313	0.35129
4930539J05Rik	2.70403	13.1731	12.2019	16.2345	15.2559	17.5298	11.877	0.886206	0.193513	0.516162
4930545L23Rik	60.8406	28.1027	41.4865	21.0093	19.7429	25.6204	16.1188	-1.00692	0.0153742	0.107533
4930546C10Rik	9.46409	4.39104	1.62692	4.77484	0.897407	4.04533	0.848359	-0.670496	0.588573	NA
4930548H24Rik	2.70403	1.75642	2.44038	0	1.79481	2.69689	2.54508	-0.395002	0.801312	NA
4930549C15Rik	31.0963	42.154	9.76153	16.2345	34.1014	44.4987	25.4508	0.278056	0.525278	0.807141
4930549G23Rik	12.1681	1.75642	4.88077	3.81987	25.1274	6.74222	19.5123	1.60946	0.0824969	0.317813
4930550C14Rik	1.35201	1.75642	7.32115	5.72981	2.69222	2.69689	7.63524	0.70073	0.52119	NA
4930552P12Rik	8.11208	0	3.25384	0	1.79481	5.39378	5.09016	0.996488	0.529916	NA
4930554I06Rik	1.35201	0	1.62692	2.8649	3.58963	0	0	1.2086	0.605674	NA
4930556M19Rik	60.8406	20.1988	23.5904	24.8292	16.1533	13.4844	19.5123	-0.709702	0.152841	0.453315
4930556N13Rik	43.2644	12.2949	21.15	11.4596	18.8455	22.9235	3.39344	-0.792159	0.206633	0.530829
4930557K07Rik	17.5762	14.0513	14.6423	6.68477	21.5378	16.1813	18.6639	0.031794	0.959324	0.989406
4930558J18Rik	2.70403	7.02567	7.32115	1.90994	1.79481	2.69689	1.69672	-1.42306	0.216678	NA
4930562C15Rik	25.6882	18.4424	38.2327	17.1894	33.204	43.1502	17.8155	0.00585241	0.991325	0.997982
4930562F07Rik	9.46409	4.39104	7.32115	4.77484	5.38444	8.09066	7.63524	-0.0471908	0.954702	NA
4930563D23Rik	0	0	5.69423	0	3.58963	0	0	0.990655	0.759816	NA
4930563E18Rik	0	0	0	0	5.38444	2.69689	1.69672	3.5549	0.1613	NA
4930563E22Rik	16.2242	21.077	13.8288	21.9643	23.3326	12.136	10.1803	0.0128651	0.982713	0.99724
4930563F08Rik	73.0087	22.8334	34.1654	14.3245	17.9481	24.272	22.9057	-0.931287	0.0356963	0.190057
4930563M21Rik	0	6.14746	0	0.954968	6.28185	5.39378	5.09016	2.69311	0.07608	NA
4930564C03Rik	2.70403	8.78209	13.0154	1.90994	5.38444	5.39378	8.48359	-0.435428	0.642849	NA
4930565N06Rik	112.217	60.5964	91.1076	81.1723	101.407	90.3458	75.504	0.0375324	0.885501	0.969408
4930570G19Rik	10.8161	10.5385	8.13461	9.54968	16.1533	16.1813	4.2418	0.143843	0.840794	0.956845
4930572O03Rik	0	1.75642	3.25384	0.954968	0.897407	0	5.09016	0.174391	0.924271	NA
4930577N17Rik	31.0963	27.2245	31.725	22.9192	24.23	32.3627	16.1188	-0.355346	0.43778	0.748894
4930578C19Rik	91.9369	77.2824	32.5384	70.6676	61.0236	74.1644	44.1147	0.0153425	0.963572	0.990308
4930578M01Rik	13.5201	3.51283	1.62692	2.8649	8.07666	9.43911	6.78688	0.611498	0.500262	NA
4930579G18Rik	163.594	59.7182	87.8538	68.7577	104.099	110.572	76.3524	-0.0813218	0.752417	0.923401
4930579G24Rik	13.5201	33.3719	41.4865	30.559	50.2548	29.6658	25.4508	0.308162	0.533542	0.812015
4930579H20Rik	5.40805	10.5385	6.50769	6.68477	21.5378	22.9235	23.7541	1.33837	0.0549865	0.247382
4930579J19Rik	1.35201	1.75642	0.813461	1.90994	4.48703	0	1.69672	0.723453	0.674138	NA
4930579K19Rik	5.40805	5.26925	11.3885	3.81987	12.5637	5.39378	13.5738	0.358974	0.675497	NA
4930579P08Rik	10.8161	0	7.32115	1.90994	0	0	4.2418	-1.00171	0.545852	NA
4930581F22Rik	54.0805	33.3719	41.4865	33.4239	57.434	51.2409	48.3565	0.178292	0.62116	0.862931
4930590J08Rik	2.70403	7.02567	4.06731	4.77484	8.97407	0	6.78688	0.256794	0.825596	NA
4930592I03Rik	83.8248	43.9104	52.0615	38.1987	43.0755	45.8471	27.9959	-0.576959	0.0858063	0.325762
4930593A02Rik	1.35201	0	4.06731	0	0.897407	1.34844	2.54508	0.329244	0.870987	NA
4930594C11Rik	135.201	47.4233	86.2269	34.3788	46.6651	90.3458	43.2663	-0.6509	0.0751129	0.300552
4930595D18Rik	10.8161	8.78209	17.8961	2.8649	8.07666	5.39378	5.93852	-1.10654	0.167488	0.477599
4930596I21Rik	28.3923	10.5385	21.15	12.4146	11.6663	12.136	11.877	-0.602481	0.278788	0.612286
4930599N23Rik	18.9282	7.90388	2.44038	7.63974	13.4611	9.43911	4.2418	0.200308	0.792624	0.938642
4931402G19Rik	13.5201	6.14746	7.32115	1.90994	8.97407	13.4844	5.93852	-0.278987	0.738823	NA
4931403E22Rik	12.1681	9.66029	14.6423	9.54968	12.5637	10.7876	6.78688	-0.290737	0.665826	0.886321
4931403G20Rik	68.9527	37.763	34.1654	21.9643	44.8703	41.8018	28.8442	-0.39931	0.288633	0.620521
4931406C07Rik	456.98	632.31	388.021	632.189	761.898	515.106	590.458	0.370067	0.0406701	0.206256
4931406H21Rik	301.499	198.475	307.488	139.425	221.659	242.72	164.582	-0.474505	0.054048	0.245606
4931406P16Rik	1154.62	908.068	824.849	836.552	909.073	858.959	840.724	-0.139572	0.254911	0.588605
4931408D14Rik	59.4886	81.6734	58.5692	70.6676	128.329	113.269	78.0491	0.529376	0.0706272	0.289809
4931414P19Rik	79.7688	62.3528	72.398	61.1179	69.9977	49.8924	56.8401	-0.248126	0.404839	0.723603
4931428F04Rik	131.145	64.1092	78.9057	72.5776	57.434	94.3911	60.2335	-0.293125	0.308845	0.639264
4931429I11Rik	5.40805	1.75642	0	4.77484	5.38444	2.69689	1.69672	1.49652	0.290536	NA
4931429P17Rik	0	3.51283	1.62692	9.54968	25.1274	10.7876	8.48359	3.31113	0.0028403	NA
4931430N09Rik	27.0403	32.4937	22.7769	20.0543	42.1781	32.3627	22.0573	0.0618385	0.889893	0.97086
4931431C16Rik	18.9282	7.90388	8.13461	9.54968	14.3585	5.39378	12.7254	0.01694	0.981037	0.996789
4931440F15Rik	16.2242	5.26925	9.76153	5.72981	10.7689	13.4844	5.09016	-0.171099	0.816353	0.947159
4931440J10Rik	0	1.75642	0.813461	2.8649	1.79481	0	1.69672	1.03703	0.604757	NA
4931440P22Rik	4.05604	5.26925	1.62692	3.81987	3.58963	10.7876	5.09016	0.762147	0.452667	NA
4932411E22Rik	2.70403	1.75642	1.62692	1.90994	1.79481	5.39378	1.69672	0.35796	0.789756	NA
4932413F04Rik	5.40805	0	3.25384	1.90994	8.97407	0	5.93852	1.68319	0.284893	NA
4932416H05Rik	56.7845	26.3463	58.5692	61.1179	59.2288	41.8018	41.5696	0.210097	0.550699	0.823447
4932418E24Rik	28.3923	32.4937	28.4711	64.9378	55.6392	51.2409	76.3524	1.05919	0.00230423	0.0277196
4932435O22Rik	4.05604	0	4.06731	3.81987	0	2.69689	8.48359	1.27946	0.406885	NA
4932438A13Rik	3699.11	2875.26	2845.49	2321.53	2842.98	2869.49	2399.16	-0.257154	0.0155802	0.108668
4932438H23Rik	10.8161	11.4167	6.50769	0	9.87147	12.136	1.69672	-1.14568	0.275713	NA
4932441J04Rik	9.46409	3.51283	1.62692	1.90994	3.58963	4.04533	6.78688	0.11522	0.916156	NA
4933400A11Rik	6.76007	3.51283	6.50769	21.0093	8.97407	6.74222	6.78688	1.00122	0.223324	0.550536
4933400F21Rik	152.777	52.6925	79.7192	83.0822	94.2277	121.36	84.8359	0.159192	0.523665	0.806325
4933401H06Rik	18.9282	1.75642	8.13461	0.954968	0	4.04533	2.54508	-1.7863	0.140153	NA
4933402D24Rik	2.70403	10.5385	5.69423	15.2795	7.17925	4.04533	2.54508	0.381933	0.697344	NA
4933404O12Rik	44.6164	46.5451	34.1654	40.1086	60.1262	64.7253	31.3893	0.197374	0.584039	0.8427
4933405D12Rik	2.70403	3.51283	0	1.90994	1.79481	0	0.848359	0.047958	0.980611	NA
4933406C10Rik	6.76007	8.78209	8.13461	4.77484	11.6663	10.7876	7.63524	0.0986532	0.898003	NA
4933406I18Rik	36.5044	24.5898	8.94807	12.4146	22.4352	17.5298	13.5738	-0.308673	0.551574	0.823998
4933406J10Rik	2.70403	9.66029	12.2019	5.72981	19.7429	0	6.78688	0.202292	0.856439	NA
4933406M09Rik	2.70403	1.75642	2.44038	1.90994	3.58963	0	5.93852	0.301801	0.83487	NA
4933407K13Rik	77.0647	69.3785	82.973	25.7841	68.2029	111.921	67.8688	-0.21794	0.620822	0.862783
4933408B17Rik	36.5044	28.1027	21.15	28.649	30.5118	25.6204	22.9057	-0.04299	0.919818	0.978305
4933411K16Rik	20.2802	14.9295	5.69423	6.68477	13.4611	21.5751	9.33195	-0.00892941	0.988519	0.997982
4933412E12Rik	27.0403	19.3206	20.3365	14.3245	25.1274	45.8471	27.1475	0.30943	0.544921	0.819499
4933413J09Rik	28.3923	13.1731	26.0308	10.5046	20.6404	13.4844	22.0573	-0.329496	0.55368	0.825342
4933416M06Rik	0	0	1.62692	5.72981	1.79481	0	2.54508	2.3165	0.253482	NA
4933416M07Rik	20.2802	5.26925	14.6423	5.72981	10.7689	12.136	8.48359	-0.328881	0.632926	0.86963
4933417A18Rik	0	5.26925	0	0.954968	3.58963	5.39378	0	1.51385	0.424406	NA
4933417D19Rik	18.9282	20.1988	18.7096	9.54968	17.9481	8.09066	19.5123	-0.472389	0.434068	0.745722
4933417G07Rik	9.46409	7.02567	16.2692	1.90994	13.4611	13.4844	3.39344	-0.562551	0.539989	0.816293
4933417O13Rik	1.35201	2.63463	4.88077	0.954968	4.48703	8.09066	4.2418	0.589484	0.629167	NA
4933421O10Rik	202.802	86.9427	115.511	101.227	148.969	125.405	154.401	0.0885587	0.734766	0.915734
4933422A05Rik	0	2.63463	3.25384	1.90994	2.69222	0	0	-0.165808	0.939853	NA
4933424G05Rik	55.4325	62.3528	69.1442	21.9643	29.6144	39.1049	25.4508	-1.12671	0.00315418	0.035032
4933424G06Rik	2.70403	3.51283	1.62692	0	1.79481	0	0	-2.52363	0.25721	NA
4933427D14Rik	492.133	292.443	300.981	307.5	330.246	376.216	266.385	-0.133298	0.38209	0.70562
4933427E11Rik	5.40805	0	8.13461	7.63974	1.79481	0	0	0.0269151	0.987714	NA
4933427G17Rik	5.40805	8.78209	6.50769	3.81987	3.58963	0	7.63524	-0.96359	0.382247	NA
4933427I22Rik	5.40805	1.75642	11.3885	3.81987	0	4.04533	5.09016	-0.653128	0.584272	NA
4933428G20Rik	5.40805	7.90388	8.94807	16.2345	10.7689	14.8329	11.877	0.861191	0.203569	0.528351
4933430I17Rik	8.11208	2.63463	2.44038	11.4596	2.69222	8.09066	2.54508	0.716741	0.494305	NA
4933431E20Rik	169.002	109.776	155.371	133.695	136.406	134.844	150.16	-0.026723	0.897538	0.973403
4933431G14Rik	2.70403	5.26925	8.13461	2.8649	15.2559	9.43911	12.7254	0.972681	0.286517	NA
4933432I09Rik	0	2.63463	1.62692	0	1.79481	2.69689	3.39344	0.808742	0.662146	NA
4933433G15Rik	16.2242	7.90388	22.7769	10.5046	17.0507	32.3627	14.4221	0.307866	0.631079	0.868615
4933433G19Rik	17.5762	13.1731	26.8442	11.4596	17.9481	16.1813	14.4221	-0.305212	0.588251	0.845424
4933433H22Rik	10.8161	1.75642	5.69423	4.77484	3.58963	16.1813	5.09016	0.550011	0.560639	NA
4933434E20Rik	509.709	386.412	435.202	401.086	422.678	353.292	496.29	-0.0702222	0.689654	0.896345
4933439C10Rik	166.298	91.3337	88.6673	84.0372	96.0225	97.088	107.742	-0.181338	0.481864	0.781141
4933439K11Rik	9.46409	14.9295	13.0154	1.90994	8.97407	5.39378	4.2418	-1.32007	0.115035	NA
4933440J02Rik	2.70403	0	2.44038	5.72981	0	0	0	-0.288145	0.909023	NA
5031414D18Rik	24.3362	29.8591	29.2846	37.2437	41.2807	39.1049	57.6884	0.657336	0.0914306	0.338333
5031425E22Rik	347.467	302.104	321.317	262.616	351.783	337.111	355.463	0.0181272	0.920171	0.978323
5031425F14Rik	2.70403	14.0513	19.5231	10.5046	17.9481	24.272	10.1803	0.593642	0.428393	0.740656
5031426D15Rik	155.481	130.853	179.775	114.596	171.405	229.235	195.123	0.195947	0.486266	0.783038
5031434C07Rik	45.9684	34.2501	12.2019	6.68477	45.7677	22.9235	25.4508	-0.149385	0.796571	0.939434
5031434O11Rik	22.9842	7.90388	13.0154	9.54968	8.97407	21.5751	11.877	-0.0539423	0.932107	0.98094
5031439G07Rik	1239.8	1144.31	1141.29	1032.32	1055.35	1011.33	939.134	-0.216561	0.0608569	0.264298
5033403F01Rik	13.5201	6.14746	11.3885	1.90994	15.2559	9.43911	9.33195	-0.157408	0.851203	0.960078
5033406O09Rik	12.1681	12.2949	9.76153	7.63974	11.6663	14.8329	11.877	0.00175094	0.997837	0.999521
5330417C22Rik	155.481	71.1349	44.7404	47.7484	49.3574	79.5582	38.1762	-0.588958	0.0518047	0.239661
5330426P16Rik	89.2329	134.366	129.34	142.29	121.15	133.496	133.192	0.181589	0.406079	0.724345
5330439B14Rik	1.35201	1.75642	4.06731	3.81987	0	5.39378	2.54508	0.382259	0.796444	NA
5430402O13Rik	8.11208	7.02567	11.3885	8.59471	10.7689	10.7876	12.7254	0.302407	0.661593	0.884272
5430403N17Rik	1.35201	1.75642	3.25384	0	0	2.69689	1.69672	-0.951808	0.62819	NA
5430405H02Rik	27.0403	11.4167	19.5231	12.4146	20.6404	35.0595	18.6639	0.211743	0.696453	0.899769
5430416N02Rik	75.7127	70.2567	71.5846	63.0279	62.8185	63.3769	71.2622	-0.151063	0.587704	0.844869
5430416O09Rik	333.947	108.02	155.371	84.9921	122.047	160.465	92.4712	-0.641796	0.00487679	0.0474468
5430419D17Rik	41.9124	1.75642	3.25384	20.0543	0	0	0	-2.80159	0.382319	0.70578
5430421F17Rik	0	12.2949	3.25384	5.72981	3.58963	0	5.09016	0.548626	0.672324	NA
5430425K12Rik	2.70403	4.39104	0.813461	4.77484	4.48703	8.09066	1.69672	1.03974	0.371447	NA
5430427O19Rik	18.9282	22.8334	40.6731	13.3695	8.97407	24.272	19.5123	-0.687769	0.222631	0.549481
5430428K19Rik	9.46409	6.14746	17.0827	6.68477	6.28185	5.39378	3.39344	-0.891318	0.271146	NA
5430431A17Rik	32.4483	10.5385	8.13461	9.54968	36.7937	10.7876	6.78688	0.0963077	0.888494	0.970166
5430437J10Rik	44.6164	14.0513	19.5231	3.81987	3.58963	9.43911	7.63524	-1.90678	0.00421983	0.0427286
5530601H04Rik	187.93	111.532	113.885	99.3167	88.8432	128.102	145.918	-0.197996	0.482772	0.781378
5730405O15Rik	12.1681	7.90388	17.0827	18.1444	16.1533	17.5298	26.2991	0.721489	0.194193	0.517235
5730408K05Rik	87.8808	28.9809	62.6365	54.4332	67.3055	53.9378	34.7827	-0.038038	0.912865	0.976198
5730409E04Rik	208.21	221.309	231.023	182.399	214.48	248.114	300.319	0.100264	0.656493	0.881646
5730416F02Rik	0	0	5.69423	1.90994	1.79481	2.69689	0	1.4068	0.523373	NA
5730420D15Rik	9.46409	15.8078	7.32115	4.77484	3.58963	8.09066	11.877	-0.561726	0.486875	0.783352
5730422E09Rik	13.5201	13.1731	4.06731	5.72981	8.97407	1.34844	5.93852	-0.686401	0.44806	NA
5730455P16Rik	344.763	295.956	314.809	339.014	370.629	355.989	361.401	0.170132	0.256219	0.589798
5730460C07Rik	0	1.75642	3.25384	1.90994	1.79481	0	1.69672	0.107509	0.954131	NA
5730480H06Rik	68.9527	36.8848	34.1654	33.4239	43.9729	49.8924	31.3893	-0.170475	0.619661	0.862464
5730507C01Rik	5.40805	33.3719	11.3885	19.0994	8.07666	45.8471	20.3606	0.786001	0.253439	0.586843
5730508B09Rik	48.6725	59.7182	72.398	78.3074	96.0225	64.7253	168.824	0.744357	0.0345602	0.186233
5730522E02Rik	2.70403	4.39104	1.62692	10.5046	1.79481	2.69689	5.09016	0.757096	0.519291	NA
5730559C18Rik	50.0245	106.263	87.0403	65.8928	69.1003	102.482	60.2335	-0.0981073	0.763752	0.927756
5830411N06Rik	2.70403	5.26925	4.88077	3.81987	5.38444	10.7876	8.48359	0.730479	0.434258	NA
5830415F09Rik	93.2889	80.7952	82.1596	73.5325	36.7937	80.9066	48.3565	-0.516488	0.149846	0.448844
5830416P10Rik	18.9282	8.78209	8.94807	5.72981	22.4352	8.09066	16.9672	0.25075	0.730943	0.914522
5830417I10Rik	350.171	234.482	239.158	245.427	226.146	316.884	206.151	-0.121543	0.518384	0.802584
5830418P13Rik	5.40805	0	6.50769	3.81987	0.897407	2.69689	1.69672	0.285681	0.84007	NA
5830428M24Rik	18.9282	6.14746	10.575	4.77484	7.17925	6.74222	10.1803	-0.531298	0.476656	0.778052
5830432E09Rik	31.0963	25.468	22.7769	35.3338	42.1781	25.6204	20.3606	0.239434	0.60165	0.852825
5830444B04Rik	14.8721	2.63463	8.94807	7.63974	16.1533	16.1813	16.9672	1.03519	0.14641	0.442106
5830454E08Rik	13.5201	10.5385	11.3885	0.954968	5.38444	0	10.1803	-1.54509	0.163335	NA
5930403L14Rik	112.217	114.167	52.0615	76.3974	96.9199	45.8471	59.3852	-0.318306	0.373653	0.697585
5930412G12Rik	17.5762	65.8656	25.2173	43.9285	76.2796	48.544	36.4795	0.682319	0.0867993	0.327616
5930430L01Rik	254.178	121.193	206.619	111.731	225.249	155.071	152.705	-0.194271	0.479551	0.779721
6030407O03Rik	2.70403	0.878209	0	1.90994	7.17925	2.69689	0	1.72369	0.32901	NA
6030408B16Rik	2.70403	1.75642	0	0.954968	2.69222	2.69689	1.69672	0.995898	0.5446	NA
6030419C18Rik	16.2242	110.654	30.9115	66.8477	64.6133	109.224	87.381	1.04528	0.00226645	0.0274646
6030443J06Rik	64.8966	43.0322	52.0615	23.8742	31.4092	41.8018	31.3893	-0.720266	0.0523017	0.240901
6030458C11Rik	432.644	355.674	363.617	407.771	430.755	360.035	357.159	0.0299202	0.849481	0.959933
6030468B19Rik	1.35201	1.75642	1.62692	3.81987	0	1.34844	0	-0.390138	0.850606	NA
6030469F06Rik	0	1.75642	0	0	1.79481	2.69689	3.39344	2.19072	0.32718	NA
6230400D17Rik	21.6322	10.5385	10.575	12.4146	28.717	6.74222	12.7254	0.200676	0.768586	0.930224
6330403A02Rik	54.0805	12.2949	29.2846	38.1987	23.3326	18.8782	22.0573	-0.0480166	0.916802	0.978047
6330403K07Rik	5.40805	24.5898	23.5904	38.1987	14.3585	37.7564	24.6024	0.889988	0.126155	0.405859
6330407A03Rik	81.1208	30.7373	50.4346	34.3788	35.8963	36.408	55.9917	-0.275497	0.469787	0.77338
6330408A02Rik	87.8808	51.8143	66.7038	59.208	56.5366	75.5129	61.9302	-0.0825471	0.776342	0.933366
6330409D20Rik	28.3923	17.5642	18.7096	17.1894	19.7429	25.6204	14.4221	-0.148048	0.763321	0.927756
6330415G19Rik	14.8721	7.02567	7.32115	5.72981	11.6663	9.43911	12.7254	0.138099	0.848592	0.959437
6330416G13Rik	179.818	154.565	213.94	156.615	206.404	168.556	219.725	0.0558857	0.800236	0.94048
6330418K02Rik	4.05604	7.90388	5.69423	13.3695	6.28185	1.34844	5.09016	0.128224	0.8961	NA
6330549D23Rik	47.3205	55.3271	52.875	54.4332	55.6392	57.9831	54.295	0.0972742	0.751309	0.923401
6430531B16Rik	10.8161	1.75642	4.06731	10.5046	7.17925	1.34844	8.48359	0.69498	0.484932	NA
6430548M08Rik	169.002	126.462	186.283	158.525	175.892	183.388	164.582	0.106247	0.604205	0.853813
6430550D23Rik	37.8564	17.5642	13.8288	14.3245	18.8455	17.5298	25.4508	-0.112615	0.833653	0.954127
6430562O15Rik	14.8721	14.9295	23.5904	18.1444	15.2559	21.5751	18.6639	0.0646319	0.901867	0.974754
6430571L13Rik	16.2242	21.077	31.725	11.4596	31.4092	5.39378	33.9344	-0.126258	0.851005	0.960078
6430573F11Rik	50.0245	28.9809	39.8596	35.3338	33.204	40.4533	35.6311	-0.0897068	0.805414	0.94258
6430584L05Rik	0	1.75642	0	1.90994	0	2.69689	3.39344	2.26496	0.313227	NA
6530402F18Rik	113.569	83.4298	102.496	102.182	111.278	140.238	179.004	0.433429	0.129263	0.41168
6720483E21Rik	4.05604	1.75642	0	0	3.58963	0	5.09016	1.17464	0.581799	NA
6720489N17Rik	20.2802	37.763	36.6057	53.4782	49.3574	39.1049	53.4466	0.665858	0.0615688	0.266078
6820408C15Rik	0	15.8078	1.62692	2.8649	10.7689	4.04533	0.848359	0.962767	0.46862	NA
6820431F20Rik	73.0087	47.4233	60.1961	50.6133	61.9211	37.7564	50.9016	-0.219191	0.511666	0.799578
8030451O07Rik	0	0	4.06731	3.81987	6.28185	0	5.09016	2.66405	0.139414	NA
8030462N17Rik	383.972	367.969	296.1	295.085	329.348	312.839	291.836	-0.174753	0.249171	0.582647
8430408G22Rik	114.921	58.84	80.5326	39.1537	57.434	79.5582	94.1679	-0.256027	0.492986	0.787347
8430419L09Rik	448.868	326.694	527.936	297.95	298.836	327.672	237.541	-0.554088	0.00379077	0.0399022
8430423G03Rik	6.76007	1.75642	6.50769	0.954968	3.58963	4.04533	0	-1.27088	0.359	NA
8430426J06Rik	56.7845	137.001	43.9269	40.1086	61.0236	109.224	89.9261	0.05975	0.869733	0.964824
8430429K09Rik	32.4483	45.6668	49.6211	39.1537	31.4092	56.6347	48.3565	0.0453185	0.906372	0.975121
8430430B14Rik	0	1.75642	0	1.90994	4.48703	4.04533	1.69672	2.76509	0.111677	NA
8430431K14Rik	117.625	46.5451	118.765	35.3338	51.1522	75.5129	40.7213	-0.796264	0.0305412	0.171793
8430436N08Rik	5.40805	0	3.25384	0	3.58963	0	2.54508	0.289595	0.885083	NA
9030025P20Rik	29.7443	22.8334	21.9634	15.2795	11.6663	17.5298	27.1475	-0.460948	0.392304	0.714449
9030612E09Rik	0	3.51283	1.62692	9.54968	0	5.39378	5.09016	2.00841	0.190554	NA
9030617O03Rik	139.257	180.033	123.646	156.615	173.199	156.42	164.582	0.156188	0.433308	0.744833
9030624G23Rik	18.9282	30.7373	14.6423	26.7391	7.17925	17.5298	3.39344	-0.585214	0.444703	0.753478
9030624J02Rik	707.103	596.304	612.536	676.117	646.133	620.284	640.511	0.0246005	0.848502	0.959409
9130008F23Rik	151.425	122.949	128.527	103.137	93.3303	87.6489	103.5	-0.457815	0.047623	0.227726
9130011E15Rik	266.347	169.494	165.946	159.48	206.404	190.131	180.701	-0.078507	0.680363	0.89272
9130019O22Rik	66.2486	66.7439	65.0769	72.5776	70.8951	66.0738	72.1106	0.0952384	0.729958	0.914288
9130019P16Rik	16.2242	11.4167	13.0154	8.59471	4.48703	17.5298	10.1803	-0.417528	0.557252	0.828182
9130023H24Rik	95.9929	129.097	120.392	110.776	106.791	109.224	119.619	-0.0418918	0.850589	0.960078
9130024F11Rik	5.40805	1.75642	2.44038	1.90994	3.58963	2.69689	0	-0.620127	0.667525	NA
9130221H12Rik	51.3765	73.7695	67.5173	66.8477	76.2796	63.3769	74.6556	0.139715	0.621409	0.863117
9130230L23Rik	44.6164	4.39104	37.4192	17.1894	10.7689	5.39378	9.33195	-0.846243	0.149732	0.448684
9130401M01Rik	150.073	223.065	194.417	228.237	182.174	177.995	251.114	0.153396	0.426894	0.739847
9230102O04Rik	63.5446	29.8591	33.3519	23.8742	45.7677	22.9235	26.2991	-0.404826	0.346247	0.675042
9230110C19Rik	22.9842	41.2758	33.3519	44.8835	45.7677	37.7564	32.2377	0.328393	0.400844	0.721985
9230112J17Rik	4.05604	1.75642	3.25384	0	0	2.69689	0	-2.63713	0.214022	NA
9230114K14Rik	36.5044	31.6155	23.5904	48.7034	28.717	29.6658	39.8729	0.281124	0.515511	0.801158
9230116L04Rik	1.35201	8.78209	5.69423	3.81987	3.58963	5.39378	6.78688	0.166367	0.867548	NA
9230116N13Rik	16.2242	6.14746	11.3885	5.72981	5.38444	10.7876	8.48359	-0.454496	0.53811	0.81526
9330020H09Rik	58.1366	25.468	44.7404	25.7841	20.6404	39.1049	36.4795	-0.397644	0.345924	0.674869
9330102E08Rik	43.2644	38.6412	32.5384	35.3338	50.2548	39.1049	49.2048	0.207571	0.572903	0.836821
9330111N05Rik	9.46409	1.75642	4.88077	0.954968	3.58963	2.69689	2.54508	-0.80731	0.485602	NA
9330133O14Rik	47.3205	43.9104	27.6577	38.1987	63.7159	49.8924	68.7171	0.52121	0.169672	0.481363
9330136K24Rik	20.2802	23.7116	26.8442	19.0994	27.8196	29.6658	25.4508	0.100056	0.828734	0.952099
9330151L19Rik	102.753	65.8656	81.3461	59.208	73.5873	71.4675	75.504	-0.217902	0.429387	0.741323
9330159F19Rik	91.9369	70.2567	28.4711	48.7034	132.816	72.816	102.651	0.645469	0.101826	0.360417
9330159M07Rik	48.6725	40.3976	39.0461	28.649	46.6651	39.1049	49.2048	-0.0468684	0.902097	0.974754
9330162012Rik	31.0963	21.077	16.2692	22.9192	10.7689	31.0142	23.7541	0.00619954	0.990965	0.997982
9330162B11Rik	13.5201	1.75642	7.32115	1.90994	2.69222	2.69689	1.69672	-1.29903	0.226444	NA
9330175E14Rik	33.8003	7.02567	22.7769	17.1894	23.3326	18.8782	18.6639	0.180797	0.723737	0.91158
9330175M20Rik	0	0.878209	2.44038	6.68477	7.17925	1.34844	1.69672	2.2727	0.139321	NA
9330179D12Rik	8.11208	7.02567	2.44038	8.59471	3.58963	8.09066	12.7254	0.618091	0.495422	NA
9330182L06Rik	2.70403	8.78209	0	3.81987	3.58963	2.69689	8.48359	1.1669	0.364492	NA
9330188P03Rik	12.1681	22.8334	8.13461	15.2795	12.5637	25.6204	23.7541	0.537697	0.359838	0.685626
9430015G10Rik	320.427	205.501	239.158	180.489	231.531	235.978	174.762	-0.288474	0.113907	0.382641
9430016H08Rik	55.4325	93.9683	113.885	95.4968	97.8173	82.2551	133.192	0.256652	0.318275	0.647875
9430018G01Rik	31.0963	19.3206	26.0308	19.0994	22.4352	16.1813	17.8155	-0.389487	0.41378	0.72963
9430020K01Rik	835.544	768.433	750.011	780.209	747.54	861.656	878.9	0.0615302	0.64821	0.877368
9430037G07Rik	56.7845	26.3463	40.6731	36.2888	32.3066	31.0142	33.086	-0.227331	0.538383	0.815343
9430038I01Rik	52.7285	40.3976	44.7404	34.3788	41.2807	44.4987	45.8114	-0.133497	0.701963	0.902754
9430041J12Rik	5.40805	5.26925	3.25384	3.81987	9.87147	4.04533	9.33195	0.59739	0.524816	NA
9430060I03Rik	4.05604	7.02567	5.69423	6.68477	6.28185	10.7876	10.1803	0.611579	0.453639	NA
9430065F17Rik	2.70403	2.63463	5.69423	1.90994	2.69222	6.74222	3.39344	0.00660593	0.995403	NA
9430069I07Rik	4.05604	5.26925	1.62692	0	5.38444	8.09066	2.54508	-0.005907	0.996216	NA
9430076C15Rik	25.6882	58.84	30.0981	33.4239	57.434	84.952	43.2663	0.530995	0.173737	0.488411
9430078K24Rik	12.1681	8.78209	4.88077	9.54968	14.3585	17.5298	11.0287	0.675433	0.300761	0.632187
9430083A17Rik	40.5604	26.3463	34.1654	24.8292	25.1274	43.1502	20.3606	-0.259439	0.555124	0.825925
9430091E24Rik	125.737	59.7182	98.4288	70.6676	98.7147	103.83	89.9261	0.0129606	0.961578	0.989937
9530014B07Rik	39.2084	98.3594	16.2692	76.3974	43.0755	29.6658	50.0532	0.279059	0.584891	0.843195
9530020I12Rik	5.40805	1.75642	1.62692	0	6.28185	0	8.48359	0.602001	0.715999	NA
9530026P05Rik	117.625	31.6155	57.7557	29.604	21.5378	25.6204	15.2705	-1.36704	0.000371102	0.00640936
9530027J09Rik	18.9282	1.75642	9.76153	3.81987	7.17925	6.74222	5.09016	-0.2557	0.762788	NA
9530051G07Rik	10.8161	10.5385	8.13461	3.81987	6.28185	0	1.69672	-1.68237	0.119031	NA
9530052E02Rik	5.40805	7.02567	1.62692	0.954968	1.79481	2.69689	5.93852	-0.505801	0.679966	NA
9530053A07Rik	6.76007	9.66029	8.13461	3.81987	0	8.09066	4.2418	-1.04768	0.348001	NA
9530059O14Rik	8.11208	7.02567	1.62692	0	8.97407	0	8.48359	-0.0514593	0.972423	NA
9530062K07Rik	9.46409	9.66029	11.3885	3.81987	10.7689	2.69689	5.93852	-0.788724	0.356048	NA
9530068E07Rik	931.537	1363.86	1290.96	1544.18	1293.16	1417.21	1375.19	0.246413	0.0500423	0.234667
9530077C05Rik	52.7285	23.7116	29.2846	13.3695	22.4352	22.9235	16.1188	-0.834646	0.0636471	0.271744
9530080O11Rik	2.70403	0	4.06731	3.81987	1.79481	0	1.69672	0.4869	0.776162	NA
9530082P21Rik	285.275	231.847	206.619	239.697	253.966	299.355	296.926	0.193228	0.297917	0.629597
9530091C08Rik	458.332	403.976	427.067	272.166	412.807	444.987	297.774	-0.288428	0.144061	0.437228
9630013A20Rik	10.8161	1.75642	10.575	11.4596	6.28185	2.69689	12.7254	0.460761	0.588021	NA
9630013K17Rik	6.76007	1.75642	1.62692	8.59471	6.28185	8.09066	6.78688	1.47931	0.122992	NA
9630028B13Rik	2.70403	10.5385	11.3885	3.81987	9.87147	5.39378	5.09016	-0.278296	0.756599	NA
9630028I04Rik	6.76007	8.78209	0	5.72981	7.17925	2.69689	5.09016	0.874713	0.455495	NA
9830147E19Rik	259.586	195.841	199.298	120.326	148.072	168.556	167.975	-0.512193	0.0165569	0.113619
9830166K06Rik	4.05604	1.75642	3.25384	0	0.897407	2.69689	5.93852	-0.259545	0.86467	NA
9930012K11Rik	41.9124	21.077	15.4558	37.2437	34.1014	32.3627	24.6024	0.433225	0.318956	0.648572
9930014A18Rik	90.5849	85.1862	82.973	105.046	68.2029	91.6942	59.3852	-0.0919858	0.766265	0.929231
9930021J03Rik	742.255	663.926	607.655	683.757	679.337	635.117	598.093	-0.0403871	0.762353	0.927202
9930104L06Rik	202.802	112.411	158.625	133.695	116.663	165.859	173.065	-0.0483657	0.840359	0.956701
9930111J21Rik1	41.9124	41.2758	47.9942	48.7034	43.0755	55.2862	66.172	0.28512	0.403407	0.722777
9930111J21Rik2	0	0	9.76153	3.81987	2.69222	2.69689	7.63524	2.05338	0.151366	NA
A130010J15Rik	131.145	97.4812	136.661	114.596	95.1251	101.133	88.2294	-0.270252	0.252378	0.585387
A130077B15Rik	2.70403	8.78209	7.32115	9.54968	8.97407	2.69689	3.39344	0.116935	0.903134	NA
A1bg	1.35201	1.75642	1.62692	1.90994	6.28185	2.69689	5.09016	1.34617	0.299106	NA
A230001M10Rik	0	3.51283	0.813461	3.81987	0.897407	0	0.848359	0.392309	0.845932	NA
A230009B12Rik	0	3.51283	3.25384	3.81987	1.79481	8.09066	3.39344	1.33709	0.328788	NA
A230020J21Rik	4.05604	4.39104	3.25384	3.81987	0	1.34844	5.09016	-0.843827	0.542568	NA
A230028O05Rik	0	2.63463	0	1.90994	1.79481	1.34844	2.54508	1.99191	0.300231	NA
A230046K03Rik	1078.91	908.946	937.921	975.022	1007.79	961.441	1016.33	0.0304161	0.795676	0.939221
A230050P20Rik	240.658	129.975	170.013	117.461	142.688	122.708	120.467	-0.457693	0.0273708	0.160341
A230056P14Rik	33.8003	23.7116	22.7769	18.1444	38.5885	20.2267	33.086	0.0820755	0.866819	0.964816
A230057D06Rik	5.40805	7.90388	3.25384	2.8649	5.38444	1.34844	1.69672	-0.874355	0.432535	NA
A230065H16Rik	4.05604	14.0513	4.88077	16.2345	12.5637	16.1813	8.48359	0.996827	0.164361	0.472696
A230072C01Rik	71.6567	63.231	41.4865	34.3788	56.5366	60.68	42.418	-0.264086	0.407127	0.724998
A230072E10Rik	14.8721	7.02567	27.6577	9.54968	17.9481	14.8329	5.93852	-0.290406	0.682238	0.8938
A230103J11Rik	20.2802	21.077	27.6577	17.1894	30.5118	35.0595	14.4221	0.0144295	0.978368	0.995936
A230108P19Rik	5.40805	0	1.62692	0	1.79481	2.69689	1.69672	0.451703	0.803441	NA
A330009N23Rik	14.8721	13.1731	5.69423	10.5046	15.2559	14.8329	14.4221	0.398689	0.522252	0.80523
A330015K06Rik	2.70403	2.63463	0	2.8649	8.07666	0	3.39344	1.73712	0.299081	NA
A330023F24Rik	558.381	191.449	255.427	144.2	230.633	209.009	166.278	-0.674649	0.000417558	0.00706964
A330032B11Rik	16.2242	4.39104	9.76153	5.72981	9.87147	9.43911	10.1803	0.0187695	0.979482	0.996531
A330033J07Rik	0	10.5385	13.0154	15.2795	12.5637	21.5751	13.5738	1.60555	0.0562752	0.250682
A330035P11Rik	18.9282	14.0513	23.5904	15.2795	17.0507	24.272	27.1475	0.180026	0.731584	0.914522
A330040F15Rik	5.40805	8.78209	2.44038	7.63974	12.5637	6.74222	5.93852	0.727787	0.388218	NA
A330041J22Rik	22.9842	4.39104	15.4558	2.8649	4.48703	6.74222	8.48359	-1.00099	0.206222	0.530514
A330048O09Rik	0	3.51283	0	0.954968	3.58963	2.69689	1.69672	1.96622	0.277845	NA
A330069E16Rik	9.46409	1.75642	0	3.81987	1.79481	4.04533	0.848359	0.689733	0.634942	NA
A330074K22Rik	8.11208	1.75642	9.76153	5.72981	10.7689	9.43911	16.9672	1.06414	0.201925	0.526084
A330076H08Rik	6.76007	5.26925	4.88077	4.77484	7.17925	10.7876	2.54508	0.0638681	0.943625	NA
A330102I10Rik	2.70403	2.63463	4.06731	7.63974	6.28185	5.39378	3.39344	0.866544	0.394281	NA
A3galt2	20.2802	5.26925	7.32115	4.77484	12.5637	8.09066	1.69672	-0.559994	0.502602	0.79386
A430005L14Rik	100.049	128.218	152.117	147.065	102.304	88.9973	121.315	-0.139415	0.55095	0.823488
A430033K04Rik	173.058	164.225	212.313	153.75	147.175	198.221	172.217	-0.123506	0.569431	0.834887
A430035B10Rik	10.8161	20.1988	17.8961	17.1894	21.5378	16.1813	18.6639	0.205898	0.697919	0.900492
A430046D13Rik	109.513	106.263	65.8903	77.3524	101.407	76.8613	95.0163	-0.055115	0.841987	0.957344
A430078G23Rik	41.9124	13.1731	26.0308	13.3695	26.0248	33.7111	28.8442	0.07622	0.879022	0.967543
A430078I02Rik	33.8003	17.5642	10.575	15.2795	28.717	6.74222	17.8155	-0.0739293	0.908069	0.97518
A430088P11Rik	55.4325	27.2245	40.6731	36.2888	19.7429	41.8018	32.2377	-0.275516	0.510164	0.798107
A430090L17Rik	90.5849	28.1027	43.1134	19.0994	41.2807	37.7564	26.2991	-0.631539	0.106409	0.367633
A430093F15Rik	0	0	6.50769	0	1.79481	0	2.54508	0.773938	0.757883	NA
A430105I19Rik	252.826	125.584	222.075	138.47	153.457	260.25	221.422	0.0213165	0.938567	0.98347
A4galt	118.977	122.071	106.563	153.75	161.533	169.904	173.065	0.509013	0.0134177	0.0980533
A530013C23Rik	67.6007	9.66029	22.7769	8.59471	20.6404	21.5751	22.0573	-0.391957	0.464867	0.769443
A530016L24Rik	469.149	878.209	941.174	887.165	1589.31	892.67	1551.65	0.734373	0.00241123	0.0286369
A530032D15Rik	6.76007	1.75642	19.5231	3.81987	7.17925	56.6347	11.877	1.41924	0.169176	0.48103
A530050N04Rik	0	11.4167	0	0	0	0	0	-2.12846	0.50934	NA
A530053G22Rik	17.5762	11.4167	4.88077	16.2345	14.3585	35.0595	27.9959	1.21686	0.0509396	0.237118
A530065N20Rik	0	5.26925	0	7.63974	4.48703	2.69689	3.39344	2.85911	0.0629274	NA
A530072M11Rik	6.76007	11.4167	6.50769	5.72981	9.87147	6.74222	16.1188	0.26642	0.731461	0.914522
A530088E08Rik	0	5.26925	3.25384	0	1.79481	5.39378	0	-0.571071	0.778361	NA
A530099J19Rik	5.40805	5.26925	13.0154	13.3695	12.5637	24.272	22.9057	1.29785	0.054342	0.246341
A630001G21Rik	94.6409	22.8334	92.7346	42.0186	47.5625	49.8924	37.3278	-0.394237	0.256161	0.589756
A630012P03Rik	0	0.878209	0.813461	1.90994	5.38444	2.69689	0.848359	2.12921	0.228752	NA
A630023A22Rik	32.4483	0	6.50769	0.954968	0	4.04533	0	-1.7109	0.254393	NA
A630033H20Rik	12.1681	26.3463	47.1807	60.163	36.7937	45.8471	52.5983	0.90744	0.0210936	0.134936
A630066F11Rik	5.40805	22.8334	19.5231	15.2795	12.5637	10.7876	20.3606	0.0685465	0.905453	0.974941
A630072M18Rik	150.073	105.385	83.7865	108.866	140.893	129.451	165.43	0.322351	0.227858	0.557143
A630075F10Rik	6.76007	8.78209	4.06731	4.77484	5.38444	4.04533	9.33195	-0.0877105	0.921849	NA
A630077J23Rik	67.6007	14.0513	55.3154	13.3695	16.1533	13.4844	9.33195	-1.50113	0.00180506	0.0230741
A630089N07Rik	173.058	113.289	155.371	100.272	87.0484	115.966	78.8974	-0.604534	0.0125866	0.0944152
A630095N17Rik	0	0	4.06731	0	0	5.39378	3.39344	2.06046	0.413931	NA
A730017C20Rik	2.70403	1.75642	0	3.81987	5.38444	13.4844	1.69672	2.4111	0.0586986	NA
A730017L22Rik	83.8248	50.0579	45.5538	47.7484	62.8185	28.3173	46.6598	-0.288255	0.456807	0.763222
A730020E08Rik	0	4.39104	1.62692	1.90994	6.28185	0	1.69672	0.943908	0.585913	NA
A730020M07Rik	2.70403	5.26925	6.50769	9.54968	1.79481	9.43911	5.09016	0.457005	0.646951	NA
A730056A06Rik	2.70403	8.78209	9.76153	13.3695	8.07666	16.1813	27.1475	1.31485	0.0687311	0.284723
A730085K08Rik	18.9282	4.39104	12.2019	9.54968	2.69222	1.34844	4.2418	-1.24615	0.168158	NA
A730090H04Rik	13.5201	9.66029	21.9634	1.90994	12.5637	16.1813	16.1188	-0.300462	0.706725	0.904563
A730090N16Rik	10.8161	1.75642	3.25384	4.77484	6.28185	9.43911	3.39344	0.551136	0.555358	NA
A830009L08Rik	5.40805	7.02567	3.25384	0.954968	5.38444	8.09066	1.69672	-0.581857	0.587277	NA
A830010M20Rik	216.322	193.206	141.542	139.425	166.02	176.646	160.34	-0.171202	0.381022	0.704946
A830018L16Rik	43.2644	46.5451	47.1807	59.208	97.8173	70.1191	64.4753	0.663339	0.0446055	0.219232
A830052D11Rik	4.05604	5.26925	14.6423	5.72981	10.7689	6.74222	11.0287	0.291972	0.71847	NA
A830080D01Rik	333.947	274.001	243.225	268.346	306.016	264.295	184.942	-0.140304	0.482574	0.781313
A830082K12Rik	20.2802	7.02567	12.2019	31.5139	62.8185	43.1502	40.7213	1.89454	6.02292e-05	0.00147894
A830082N09Rik	59.4886	64.9874	84.5999	70.6676	108.586	99.7849	67.0204	0.299336	0.357456	0.684066
A930001C03Rik	5.40805	1.75642	10.575	0.954968	2.69222	0	2.54508	-1.53961	0.246515	NA
A930003O13Rik	4.05604	1.75642	0.813461	0	0	0	3.39344	-1.63992	0.484461	NA
A930004D18Rik	28.3923	41.2758	22.7769	46.7934	41.2807	36.408	32.2377	0.388027	0.329629	0.657978
A930005H10Rik	33.8003	25.468	34.9788	20.0543	27.8196	31.0142	27.9959	-0.22388	0.602544	0.853294
A930006K02Rik	14.8721	12.2949	19.5231	8.59471	9.87147	4.04533	17.8155	-0.629332	0.359887	0.685626
A930007I19Rik	20.2802	11.4167	26.0308	7.63974	8.07666	20.2267	11.0287	-0.670251	0.300576	0.632067
A930009A15Rik	1.35201	14.9295	4.88077	2.8649	8.07666	9.43911	5.09016	0.240831	0.796614	NA
A930012L18Rik	47.3205	14.0513	40.6731	8.59471	13.4611	10.7876	11.0287	-1.42764	0.00656757	0.0589039
A930013F10Rik	143.313	72.0131	125.273	85.9471	90.6381	106.527	104.348	-0.158314	0.521065	0.804509
A930015D03Rik	52.7285	21.9552	26.8442	38.1987	34.9989	32.3627	32.2377	0.154332	0.692141	0.897543
A930016O22Rik	5.40805	0.878209	4.88077	4.77484	21.5378	0	17.8155	1.99923	0.106354	NA
A930017M01Rik	0	3.51283	1.62692	0	3.58963	0	3.39344	0.509363	0.808118	NA
A930019D19Rik	39.2084	18.4424	20.3365	21.9643	25.1274	14.8329	16.1188	-0.302817	0.539348	0.815892
A930024E05Rik	31.0963	23.7116	34.9788	21.0093	29.6144	18.8782	27.9959	-0.265367	0.554809	0.82573
A930041C12Rik	2.70403	5.26925	5.69423	2.8649	4.48703	10.7876	4.2418	0.226577	0.822134	NA
AA388235	29.7443	20.1988	30.9115	17.1894	32.3066	35.0595	25.4508	0.0310631	0.947222	0.98547
AA413626	12.1681	7.90388	6.50769	6.68477	2.69222	10.7876	2.54508	-0.651386	0.465645	NA
AA414768	2.70403	12.2949	8.94807	11.4596	12.5637	4.04533	23.7541	0.878793	0.255606	0.589351
AA415398	70.3047	50.0579	37.4192	39.1537	42.1781	48.544	37.3278	-0.283966	0.39141	0.713499
AA465934	9.46409	9.66029	13.8288	2.8649	11.6663	12.136	9.33195	-0.320237	0.681881	0.893488
AA467197	0	1.75642	1.62692	1.90994	5.38444	0	3.39344	1.51372	0.392133	NA
AA474331	50.0245	21.9552	17.0827	46.7934	26.0248	24.272	30.5409	0.264325	0.59099	0.846719
AA543186	17.5762	13.1731	14.6423	9.54968	14.3585	9.43911	17.8155	-0.214185	0.72825	0.913563
AA986860	67.6007	32.4937	36.6057	31.5139	32.3066	29.6658	24.6024	-0.53312	0.155617	0.457941
Aaas	210.914	143.148	187.91	222.507	166.918	155.071	128.951	-0.0785714	0.743507	0.920354
Aacs	888.273	1247.93	1113.63	1228.09	2017.37	1070.66	1730.65	0.484461	0.0274502	0.160575
Aaed1	125.737	205.501	156.998	213.913	195.635	180.692	232.45	0.356607	0.0596763	0.260767
Aagab	338.003	418.906	398.596	398.222	380.5	396.443	451.327	0.0783548	0.591637	0.847106
Aak1	1253.32	1078.44	1187.65	939.688	1160.35	1181.24	900.109	-0.169498	0.232127	0.562669
Aamdc	135.201	195.841	194.417	161.39	200.122	145.632	271.475	0.155349	0.524541	0.80684
Aamp	950.465	909.824	982.661	913.904	775.359	787.491	951.859	-0.147031	0.254518	0.588154
Aanat	13.5201	8.78209	7.32115	0	5.38444	2.69689	4.2418	-1.63542	0.12604	NA
Aar2	247.418	272.245	273.323	274.076	230.633	227.887	243.479	-0.116749	0.491847	0.786872
Aard	0	0	3.25384	3.81987	0	5.39378	8.48359	2.89677	0.109799	NA
Aars	804.448	862.401	1000.56	993.167	819.332	852.217	944.224	0.0217097	0.854973	0.960748
Aars2	162.242	209.892	209.873	168.074	158.841	184.737	161.188	-0.206526	0.294752	0.62627
Aarsd1	219.026	225.7	233.463	229.192	242.3	231.932	224.815	0.0365578	0.830299	0.952776
Aasdh	486.725	232.725	292.033	237.787	259.35	291.264	215.483	-0.348978	0.0273128	0.160211
Aasdhppt	264.995	342.501	361.177	394.402	367.039	319.581	393.639	0.196128	0.191572	0.513466
Aass	39.2084	30.7373	56.9423	37.2437	16.1533	28.3173	24.6024	-0.646495	0.131741	0.416282
Aatf	532.693	357.431	445.777	298.905	231.531	324.975	274.868	-0.63288	0.00032278	0.00575587
Aatk	158.186	244.142	138.288	191.949	225.249	333.066	193.426	0.395723	0.0673308	0.281425
AB124611	13.5201	22.8334	39.0461	39.1537	51.1522	35.0595	55.1434	0.938263	0.0258346	0.153883
Abat	74.3607	230.091	97.6153	300.815	233.326	306.097	260.446	1.1934	4.85694e-08	3.06749e-06
Abca1	5759.58	5044.43	4829.52	4263.93	5164.57	4886.76	4857.71	-0.114828	0.294579	0.625991
Abca12	0	10.5385	4.06731	7.63974	0.897407	1.34844	0	-0.0152234	0.992592	NA
Abca2	1272.24	1319.07	1312.11	1002.72	1146.89	1108.42	1162.25	-0.236517	0.0507479	0.236448
Abca3	1512.9	952.856	1112	975.022	980.865	1109.77	892.474	-0.236569	0.0413558	0.208246
Abca4	22.9842	3.51283	7.32115	17.1894	9.87147	10.7876	11.877	0.60625	0.372897	0.697193
Abca5	246.066	368.848	276.577	337.104	391.269	438.244	352.069	0.358174	0.028059	0.162429
Abca6	190.634	336.354	313.183	294.13	528.572	443.638	398.729	0.586726	0.0136694	0.0993384
Abca7	362.339	271.366	282.271	325.644	290.76	312.839	275.717	-0.00192061	0.990542	0.997982
Abca8a	1001.84	1475.39	1695.25	1959.59	2265.95	1968.73	2062.36	0.595642	5.32303e-05	0.00133568
Abca8b	325.835	278.392	300.981	291.265	366.142	405.882	338.495	0.21401	0.214574	0.540434
Abca9	557.029	902.798	1057.5	1447.73	1466.36	1305.29	1480.39	0.801606	6.09171e-09	4.72901e-07
Abcb10	269.051	260.828	344.094	283.625	272.812	234.629	282.504	-0.108554	0.504015	0.794371
Abcb1a	271.755	209.892	215.567	219.643	260.248	268.34	260.446	0.132248	0.449954	0.757444
Abcb1b	89.2329	135.244	114.698	141.335	117.56	129.451	162.885	0.294043	0.188278	0.508643
Abcb4	45.9684	50.9361	63.45	9.54968	131.919	17.5298	103.5	0.294343	0.792157	0.938642
Abcb6	204.154	210.77	187.096	242.562	174.994	182.04	228.209	0.0402985	0.848087	0.959359
Abcb7	481.317	566.445	588.132	644.603	654.209	524.545	583.671	0.144358	0.327358	0.655909
Abcb8	336.651	382.021	340.027	344.743	385.885	345.202	430.967	0.0951433	0.560702	0.830141
Abcb9	81.1208	70.2567	62.6365	57.2981	79.8692	99.7849	100.106	0.247575	0.425063	0.738755
Abcc1	900.441	806.196	760.586	789.758	799.589	949.305	818.667	0.0327999	0.79708	0.93951
Abcc10	392.084	189.693	187.91	182.399	211.788	245.417	179.852	-0.230081	0.182574	0.50113
Abcc12	5.40805	3.51283	0	3.81987	0.897407	2.69689	0	0.281034	0.875418	NA
Abcc2	1.35201	1.75642	4.88077	1.90994	0	0	6.78688	-0.790257	0.640518	NA
Abcc3	233.898	290.687	267.629	198.633	190.25	200.918	218.028	-0.386592	0.0242698	0.14824
Abcc4	174.41	307.373	197.671	244.472	325.759	256.204	309.651	0.36004	0.0515063	0.238787
Abcc5	1110	807.074	593.827	708.586	1026.63	1012.68	770.31	0.109082	0.382559	0.705873
Abcc8	82.4728	51.8143	26.0308	48.7034	82.5614	59.3315	41.5696	0.250585	0.450081	0.757505
Abcc9	831.488	634.067	618.23	705.721	965.609	794.234	775.401	0.238908	0.101428	0.359521
Abcd1	243.362	207.257	222.075	248.292	284.478	254.856	289.291	0.272558	0.119207	0.392657
Abcd2	1249.26	2255.24	1382.07	2180.19	2646.45	2568.79	4483.58	0.885906	7.34467e-05	0.00173216
Abcd3	1031.59	1386.69	1185.21	1293.03	1284.19	1088.19	1164.8	0.0128751	0.919404	0.97827
Abcd4	216.322	150.174	140.729	123.191	174.994	191.479	160.34	-0.0328665	0.876423	0.96692
Abce1	1211.4	1425.33	1467.48	1538.45	1257.27	1320.13	1549.1	0.046683	0.687972	0.895327
Abcf1	1103.24	937.049	1070.51	975.977	778.949	829.293	769.462	-0.301396	0.0295004	0.168146
Abcf2	523.229	662.169	721.54	694.262	636.261	583.876	630.331	0.00731682	0.956042	0.98854
Abcf3	778.759	605.964	558.848	520.457	528.572	496.227	559.917	-0.2775	0.0635217	0.27156
Abcg1	375.86	402.22	528.75	328.509	273.709	288.567	354.614	-0.477691	0.00129825	0.0176234
Abcg2	565.141	356.553	763.026	488.944	433.447	444.987	509.864	-0.188277	0.186952	0.507194
Abcg3	35.1523	58.84	69.1442	104.091	68.2029	78.2098	78.0491	0.624735	0.0377096	0.196317
Abcg4	20.2802	38.6412	17.0827	23.8742	17.0507	16.1813	23.7541	-0.244258	0.623595	0.8643
Abcg5	2.70403	0	7.32115	10.5046	3.58963	9.43911	5.09016	2.11792	0.0742018	NA
Abcg8	1.35201	0	2.44038	0	5.38444	0	1.69672	1.20268	0.60112	NA
Abhd1	6.76007	2.63463	7.32115	0.954968	2.69222	5.39378	2.54508	-0.884416	0.432281	NA
Abhd10	137.905	160.712	117.138	139.425	117.56	125.405	145.918	-0.0589371	0.796103	0.939399
Abhd11	363.692	259.072	405.917	339.969	269.222	331.717	349.524	-0.0614249	0.70732	0.904679
Abhd11os	29.7443	12.2949	25.2173	21.9643	17.9481	14.8329	11.877	-0.319409	0.541877	0.817891
Abhd12	458.332	497.066	612.536	580.62	603.057	485.44	643.056	0.151855	0.294166	0.625708
Abhd13	519.173	641.971	603.588	580.62	469.344	501.621	584.52	-0.141986	0.313045	0.642338
Abhd14a	108.161	121.193	127.713	155.66	129.227	114.618	138.283	0.175278	0.424839	0.738672
Abhd14b	331.243	201.11	321.317	236.832	227.941	240.023	262.143	-0.191002	0.255415	0.589351
Abhd15	155.481	274.879	174.894	177.624	226.146	222.493	302.016	0.233025	0.29889	0.630657
Abhd16a	370.452	422.418	431.134	438.33	380.5	454.426	473.385	0.0959208	0.527659	0.809121
Abhd16b	2.70403	12.2949	3.25384	9.54968	7.17925	8.09066	4.2418	0.575099	0.517576	NA
Abhd17a	233.898	246.777	193.604	240.652	206.404	221.145	246.024	0.0320438	0.866326	0.964816
Abhd17b	271.755	284.54	361.177	329.464	266.53	241.371	304.561	-0.0955398	0.550488	0.823325
Abhd17c	797.688	332.841	780.109	459.34	355.373	273.734	340.192	-0.72164	2.18872e-05	0.000638413
Abhd2	1880.65	1873.22	1475.62	2038.86	1602.77	1612.74	1192.79	-0.1029	0.58923	0.845875
Abhd3	60.8406	58.84	49.6211	51.5683	61.9211	39.1049	54.295	-0.109749	0.742842	0.920218
Abhd4	459.684	623.528	529.563	793.578	770.872	582.528	765.22	0.440827	0.00438353	0.04385
Abhd5	755.775	733.304	614.163	621.684	885.74	656.692	1292.9	0.297737	0.249346	0.582647
Abhd6	90.5849	137.001	118.765	119.371	139.995	103.83	129.799	0.108472	0.640124	0.873531
Abhd8	45.9684	68.5003	113.885	108.866	85.2536	86.3004	81.4425	0.320695	0.274108	0.607522
Abi1	851.768	728.913	867.149	790.713	801.384	888.625	865.327	0.0422086	0.740924	0.918682
Abi2	493.485	648.996	553.154	656.063	682.029	774.007	645.602	0.286283	0.0388944	0.200122
Abi3	108.161	70.2567	90.2942	103.137	81.664	80.9066	107.742	0.0885911	0.733964	0.915689
Abi3bp	328.539	457.547	353.042	603.54	699.08	679.616	648.995	0.798949	2.29239e-09	2.05832e-07
Abl1	1906.34	1710.75	1593.57	1514.58	1609.05	1800.17	1448.15	-0.122713	0.267994	0.602845
Abl2	949.113	836.055	789.871	784.029	832.793	775.355	663.417	-0.162677	0.214509	0.540434
Ablim1	2124.01	1860.92	1351.97	1764.78	2237.23	2208.75	1883.36	0.207831	0.0529557	0.24249
Ablim2	117.625	57.9618	43.1134	46.7934	92.4329	67.4222	77.2007	0.10732	0.750052	0.92286
Ablim3	654.374	391.681	258.681	383.897	363.45	482.743	423.331	0.040986	0.840668	0.956793
Abo	2.70403	13.1731	1.62692	5.72981	6.28185	18.8782	5.93852	1.09985	0.221261	NA
Abr	759.831	679.733	843.559	776.389	542.034	720.069	627.786	-0.186985	0.250901	0.583753
Abra	55.4325	24.5898	13.8288	13.3695	101.407	9.43911	13.5738	0.193136	0.793653	0.938642
Abracl	191.986	236.238	247.292	213.913	197.429	138.89	229.905	-0.210501	0.302905	0.634101
Abt1	113.569	158.078	118.765	149.93	138.201	120.012	140.828	0.0891658	0.682627	0.894153
Abtb1	310.963	189.693	171.64	185.264	225.249	213.054	173.914	-0.112671	0.525251	0.807141
Abtb2	150.073	210.77	126.086	143.245	140.893	169.904	123.012	-0.150107	0.474263	0.776034
Acaa1a	481.317	426.809	498.652	451.7	409.217	385.655	464.053	-0.12865	0.363819	0.689415
Acaa1b	66.2486	79.917	48.8077	69.7126	103.202	98.4364	85.6843	0.474277	0.0764492	0.304056
Acaa2	597.59	1278.67	654.023	782.119	1042.79	685.01	673.597	-0.0123335	0.9463	0.984955
Acaca	7025.06	13055.4	8878.93	11970.5	18917.3	7587.69	17723.1	0.561282	0.178385	0.495035
Acacb	2752.7	3373.2	1666.78	2026.44	4074.23	1236.52	2225.25	-0.0682501	0.895453	0.972773
Acad10	174.41	131.731	130.154	118.416	123.842	117.315	123.86	-0.244071	0.253382	0.586802
Acad11	570.549	815.856	586.505	697.126	835.485	791.537	883.142	0.297961	0.0304608	0.17151
Acad12	70.3047	64.9874	87.0403	66.8477	80.7666	76.8613	58.5368	-0.066726	0.822352	0.950185
Acad8	277.163	326.694	243.225	305.59	280.888	254.856	320.68	0.0493779	0.786325	0.93662
Acad9	1118.11	859.766	1077.02	1054.28	809.461	799.627	857.691	-0.200013	0.149158	0.447324
Acadl	1365.53	2024.27	842.746	1469.7	2002.11	1121.91	1070.63	0.0861016	0.700879	0.902229
Acadm	947.761	1557.06	829.73	1347.46	1441.23	884.579	1458.33	0.245656	0.23615	0.56764
Acads	375.86	661.291	483.196	601.63	549.213	442.29	664.265	0.174877	0.272673	0.606223
Acadsb	915.313	1149.58	1036.35	1201.35	1355.98	1074.71	1903.72	0.408329	0.0321746	0.177945
Acadvl	1134.34	2019.88	1040.42	1393.3	1635.97	887.276	1283.57	-0.0508719	0.811519	0.945271
Acap1	86.5288	33.3719	52.875	38.1987	52.0496	44.4987	43.2663	-0.243622	0.460549	0.766078
Acap2	1535.89	1485.05	1551.27	1255.78	1436.75	1421.26	1286.11	-0.176246	0.133978	0.419458
Acap3	388.028	272.245	302.608	258.796	296.144	377.564	281.655	-0.0682111	0.697252	0.900254
Acat1	922.073	1460.46	1108.75	1496.43	1350.6	1204.16	1612.73	0.294046	0.0242214	0.14808
Acat2	194.69	384.655	316.436	467.934	688.311	269.689	676.142	0.840594	0.00277218	0.0319809
Acat3	12.1681	17.5642	19.5231	10.5046	15.2559	12.136	16.9672	-0.241997	0.675898	0.891336
Acbd3	520.525	621.772	560.475	549.106	598.57	608.148	640.511	0.077593	0.562883	0.831227
Acbd4	481.317	518.143	331.892	493.718	656.004	582.528	595.548	0.414865	0.00685851	0.0607765
Acbd5	689.527	692.907	577.557	812.678	793.307	653.995	858.54	0.259081	0.105821	0.366378
Acbd6	132.497	191.449	187.91	145.155	153.457	164.51	148.463	-0.152739	0.459754	0.765405
Acbd7	6.76007	1.75642	20.3365	1.90994	3.58963	0	0	-2.12131	0.126917	NA
Accs	221.73	95.7247	138.288	149.93	147.175	145.632	100.955	-0.0659711	0.767702	0.929626
Accsl	5.40805	1.75642	4.88077	0	1.79481	0	0	-2.99505	0.137918	NA
Acd	120.329	97.4812	122.833	99.3167	82.5614	88.9973	92.4712	-0.312422	0.18409	0.502901
Ace	419.124	654.265	811.021	804.083	772.667	856.262	878.052	0.437388	0.00578515	0.0535908
Ace2	9.46409	7.02567	0	5.72981	1.79481	5.39378	3.39344	0.475885	0.700734	NA
Acer2	263.643	232.725	148.05	227.282	227.941	218.448	155.25	-0.0113598	0.957134	0.988858
Acer3	239.306	369.726	350.602	327.554	270.119	314.187	375.823	0.0193291	0.906728	0.975121
Ache	17.5762	15.8078	17.8961	14.3245	22.4352	2.69689	8.48359	-0.489038	0.513656	0.801027
Acin1	2559.36	1638.74	1744.87	1431.5	1572.26	1770.51	1473.6	-0.308585	0.00468827	0.0460334
Ackr1	41.9124	47.4233	31.725	54.4332	88.8432	84.952	67.8688	0.875736	0.00479786	0.0468318
Ackr2	16.2242	24.5898	34.9788	41.0636	39.4859	64.7253	50.0532	0.977884	0.0217865	0.137947
Ackr3	152.777	130.853	272.509	222.507	227.941	163.162	240.934	0.27306	0.190917	0.512632
Ackr4	51.3765	43.9104	115.511	81.1723	75.3821	66.0738	64.4753	0.153486	0.630731	0.868377
Acly	4709.06	15496.9	11634.9	18514	27652.7	8114.94	30995.7	1.09408	0.0309106	0.173139
Acmsd	2.70403	8.78209	8.94807	0	3.58963	10.7876	6.78688	-0.324077	0.783781	NA
Acnat1	0	1.75642	2.44038	3.81987	4.48703	10.7876	5.09016	2.26011	0.0825979	NA
Aco1	1399.33	1831.94	1578.11	1852.64	1680.84	1453.62	2107.32	0.139695	0.318145	0.647808
Aco2	2086.16	5195.48	2497.33	3517.15	3927.05	2490.58	3595.35	0.149686	0.381784	0.705576
Acot1	723.327	572.592	400.223	568.206	393.064	409.927	258.75	-0.426181	0.102832	0.361849
Acot11	56.7845	367.091	89.4807	143.245	195.635	47.1955	45.8114	-0.210732	0.782668	0.936265
Acot13	120.329	130.853	151.304	158.525	218.967	90.3458	169.672	0.254358	0.404464	0.723235
Acot2	113.569	148.417	108.19	128.921	134.611	128.102	117.074	0.0528753	0.806385	0.943222
Acot3	5.40805	0	5.69423	4.77484	0	0	3.39344	-0.379012	0.827469	NA
Acot4	33.8003	25.468	47.1807	20.0543	33.204	28.3173	44.9631	-0.115288	0.798119	0.939881
Acot5	2.70403	0	3.25384	3.81987	3.58963	0	5.09016	1.4363	0.363814	NA
Acot6	95.9929	73.7695	71.5846	77.3524	35.8963	51.2409	52.5983	-0.564244	0.111565	0.377669
Acot7	85.1768	183.546	69.9576	138.47	138.201	142.935	137.434	0.422142	0.0658977	0.277694
Acot8	58.1366	72.8913	97.6153	72.5776	73.5873	79.5582	84.8359	0.0440503	0.873328	0.965343
Acot9	223.082	334.597	305.861	381.987	348.194	324.975	497.139	0.43397	0.0122522	0.0928047
Acox1	2414.7	2322.86	1722.1	2174.46	2765.81	2146.72	2622.28	0.190421	0.216545	0.542343
Acox2	4.05604	3.51283	7.32115	9.54968	19.7429	13.4844	7.63524	1.33755	0.0959994	0.348599
Acox3	465.092	504.97	374.192	415.411	441.524	426.108	398.729	-0.081374	0.563952	0.832018
Acoxl	2.70403	10.5385	8.94807	7.63974	7.17925	4.04533	18.6639	0.469211	0.567946	0.834433
Acp1	224.434	313.52	354.669	349.518	319.477	319.581	391.094	0.225543	0.141392	0.433453
Acp2	575.958	584.009	673.546	612.134	664.978	639.162	668.507	0.0827696	0.534345	0.81307
Acp5	490.781	1000.28	776.855	858.516	935.995	933.123	1503.29	0.513981	0.00618119	0.056418
Acp6	264.995	231.847	203.365	216.778	232.428	194.176	231.602	-0.0778152	0.68066	0.892768
Acpp	32.4483	73.7695	43.9269	113.641	66.4081	56.6347	83.1392	0.729761	0.0332948	0.18198
Acpt	8.11208	5.26925	13.0154	8.59471	15.2559	4.04533	9.33195	0.194591	0.806389	0.943222
Acr	16.2242	3.51283	4.88077	7.63974	13.4611	9.43911	0.848359	0.154361	0.86639	NA
Acrbp	174.41	83.4298	100.869	62.0729	80.7666	90.3458	94.1679	-0.456236	0.0966187	0.349794
Acsbg1	63.5446	126.462	29.2846	46.7934	95.1251	66.0738	14.4221	-0.291769	0.517059	0.801607
Acsf2	340.707	411.002	292.846	351.428	376.013	310.142	279.959	-0.0683468	0.698792	0.901073
Acsf3	301.499	258.193	204.992	221.553	289.862	209.009	171.369	-0.177111	0.400519	0.721985
Acsl1	5833.94	8040.88	6239.25	6686.68	7832.56	6576.36	10713.1	0.24249	0.172264	0.485987
Acsl3	539.453	484.771	551.527	553.881	461.267	463.865	461.508	-0.111624	0.438771	0.749776
Acsl4	788.224	879.087	865.523	807.903	828.306	752.432	642.208	-0.157427	0.290783	0.622547
Acsl5	677.359	1128.5	911.89	1007.49	884.843	831.99	866.175	0.00720243	0.956726	0.988858
Acsl6	17.5762	16.686	18.7096	2.8649	10.7689	2.69689	14.4221	-1.18865	0.135756	0.423033
Acsm3	97.3449	56.2054	28.4711	81.1723	44.8703	36.408	31.3893	-0.148996	0.75518	0.924551
Acsm4	1.35201	5.26925	4.06731	1.90994	0	1.34844	1.69672	-1.43984	0.351348	NA
Acsm5	93.2889	55.3271	50.4346	35.3338	43.0755	33.7111	29.6926	-0.83667	0.0128667	0.0955546
Acss1	692.231	402.22	692.255	518.548	448.703	360.035	393.639	-0.417509	0.0104125	0.0825961
Acss2	803.096	2070.82	1809.14	2486.74	4003.33	1421.26	4254.52	1.02295	0.0237893	0.146583
Acss2os	17.5762	8.78209	22.7769	8.59471	21.5378	5.39378	10.1803	-0.387653	0.587459	0.844856
Acss3	555.677	384.655	222.888	292.22	399.346	333.066	446.237	0.0336922	0.8918	0.97166
Acta1	4358.89	7416.47	6943.7	226.327	11868.2	614.89	12957	0.0137638	0.992571	0.998062
Acta2	2118.6	5871.7	3423.86	7055.3	4284.22	4836.87	5401.5	0.59891	0.000573972	0.00919162
Actb	9892.68	20831.1	17426	24485.4	18423.8	20233.4	22096.4	0.458133	0.000117873	0.00256482
Actbl2	5.40805	0	1.62692	0	0	5.39378	1.69672	0.524705	0.801131	NA
Actc1	6.76007	47.4233	14.6423	3.81987	19.7429	1.34844	15.2705	-0.794327	0.334366	0.662817
Actg1	1114.06	1982.12	1573.23	2164.91	1588.41	1802.87	1841.79	0.274525	0.0485693	0.230669
Actg2	33.8003	414.514	87.0403	468.889	262.94	214.403	291.836	1.48431	1.07818e-06	4.80138e-05
Actl10	2.70403	1.75642	10.575	7.63974	2.69222	9.43911	0.848359	0.362523	0.758354	NA
Actl6a	290.683	379.386	446.59	478.439	319.477	346.55	388.549	0.0476202	0.776321	0.933366
Actl7a	5.40805	5.26925	3.25384	3.81987	13.4611	2.69689	0.848359	0.0747933	0.947543	NA
Actl9	10.8161	3.51283	4.06731	1.90994	2.69222	2.69689	0	-1.67932	0.181951	NA
Actn1	1027.53	1976.85	1282.01	1671.19	1454.7	1703.08	1348.89	0.155648	0.291685	0.62333
Actn2	429.94	141.392	283.084	21.0093	1415.21	86.3004	158.643	0.422835	0.773825	0.932708
Actn3	784.168	1602.73	1805.88	13.3695	1424.18	75.5129	2432.25	-0.562659	0.726855	0.912933
Actn4	2499.87	3489.12	3110.68	3050.17	3022.47	3100.07	2441.58	-0.0564567	0.688149	0.895327
Actr10	287.979	433.835	452.284	525.232	464.857	354.641	514.954	0.259812	0.0958534	0.348409
Actr1a	1246.56	1378.79	1249.48	1451.55	1198.94	1330.91	1353.98	0.0451078	0.718996	0.909477
Actr1b	578.662	802.683	635.313	749.65	638.056	651.298	777.097	0.0715739	0.606656	0.855115
Actr2	1571.04	1621.17	1771.72	1764.78	1720.33	1699.04	1662.78	0.0497623	0.64433	0.875056
Actr3	1273.6	1503.49	1452.03	1555.64	1509.44	1407.78	1494.81	0.0818537	0.45042	0.757732
Actr3b	28.3923	24.5898	57.7557	30.559	20.6404	18.8782	44.9631	-0.306805	0.462129	0.767554
Actr5	179.818	147.539	130.967	112.686	111.278	114.618	112.832	-0.418191	0.0514072	0.238551
Actr6	108.161	116.802	113.885	97.4067	95.1251	97.088	95.8646	-0.230614	0.315843	0.645412
Actr8	393.436	307.373	325.384	371.482	335.63	374.867	368.188	0.0972203	0.524903	0.807081
Acvr1	363.692	403.976	401.036	280.761	407.423	355.989	261.295	-0.271121	0.177169	0.493222
Acvr1b	496.189	402.22	417.306	379.122	351.783	432.851	371.581	-0.184449	0.222587	0.549464
Acvr1c	1237.09	1304.14	437.642	1222.36	1515.72	1402.38	1712.84	0.720331	0.00222717	0.0272098
Acvr2a	598.942	588.4	604.402	635.054	645.235	697.146	667.659	0.146181	0.252246	0.585353
Acvr2b	114.921	90.4555	66.7038	54.4332	63.7159	62.0284	68.7171	-0.498441	0.0821553	0.317086
Acvrl1	320.427	353.918	317.25	364.798	277.299	447.683	365.643	0.135835	0.501916	0.793494
Acy1	90.5849	86.9427	152.931	101.227	76.2796	98.4364	112.832	-0.146321	0.557696	0.828513
Acy3	52.7285	36.8848	25.2173	58.253	42.1781	59.3315	38.1762	0.434252	0.246875	0.58
Acyp1	55.4325	45.6668	49.6211	40.1086	59.2288	40.4533	63.627	0.0339502	0.924613	0.979352
Acyp2	44.6164	120.315	78.0923	107.911	141.79	109.224	174.762	0.808712	0.00223429	0.0272691
Ada	102.753	77.2824	106.563	98.3617	81.664	76.8613	78.0491	-0.172121	0.496853	0.789373
Adal	159.538	149.295	126.9	142.29	124.74	121.36	149.311	-0.101664	0.652263	0.878639
Adam10	1430.43	2258.75	1551.27	1835.45	1622.51	1591.16	1232.67	-0.13032	0.437082	0.748215
Adam11	67.6007	43.0322	26.0308	21.0093	54.7418	32.3627	18.6639	-0.476271	0.260776	0.595148
Adam12	221.73	607.72	235.09	555.791	944.969	930.426	644.753	1.22727	1.37516e-13	2.84678e-11
Adam15	866.64	874.696	819.969	870.931	873.177	1059.88	997.671	0.153918	0.259721	0.593815
Adam17	754.423	958.126	884.232	985.527	868.69	879.186	837.331	0.0464984	0.721591	0.910592
Adam19	383.972	491.797	383.14	755.38	741.258	869.746	603.184	0.82207	3.14502e-07	1.5675e-05
Adam1a	127.089	70.2567	67.5173	52.5232	94.2277	94.3911	81.4425	-0.0684248	0.813088	0.94547
Adam1b	5.40805	0	3.25384	0	1.79481	0	0	-1.62459	0.521703	NA
Adam21	22.9842	14.0513	12.2019	5.72981	8.97407	13.4844	6.78688	-0.900609	0.160987	0.467876
Adam22	124.385	200.232	187.91	233.967	203.711	250.811	218.877	0.423365	0.0338245	0.183796
Adam23	183.874	700.81	394.529	496.583	869.587	1112.47	862.782	1.11586	1.38542e-05	0.000438694
Adam28	5.40805	1.75642	4.06731	0	0	0	0	-4.18747	0.0718705	NA
Adam32	6.76007	5.26925	3.25384	0.954968	6.28185	5.39378	2.54508	-0.497596	0.639703	NA
Adam33	123.033	119.436	77.2788	90.7219	97.8173	146.98	102.651	0.0555176	0.82567	0.951216
Adam4	175.762	79.0388	109.004	42.0186	82.5614	67.4222	49.2048	-0.938194	0.00163775	0.0212637
Adam5	2.70403	13.1731	5.69423	7.63974	12.5637	0	10.1803	0.329368	0.751996	NA
Adam8	144.665	212.526	130.967	156.615	126.534	117.315	150.16	-0.215945	0.355302	0.683679
Adam9	923.425	1085.47	892.367	1039	935.098	989.758	999.367	0.0374981	0.760243	0.926587
Adamdec1	33.8003	7.02567	93.548	46.7934	16.1533	26.9689	73.8073	0.407635	0.360681	0.686423
Adamts1	304.203	707.836	553.154	588.26	638.056	858.959	776.249	0.51702	0.0074869	0.0649547
Adamts10	801.744	620.015	505.159	554.836	606.647	964.138	702.442	0.157766	0.40466	0.723369
Adamts12	1023.47	2245.58	1190.91	2466.68	2856.44	2955.79	2497.57	0.925803	3.49149e-17	1.44557e-14
Adamts13	5.40805	0	2.44038	2.8649	0	5.39378	2.54508	1.07193	0.514584	NA
Adamts14	82.4728	152.808	69.1442	159.48	150.764	273.734	174.762	0.961099	0.000251145	0.00463856
Adamts15	716.567	1424.45	627.992	909.129	1004.2	983.016	806.79	0.0873115	0.505542	0.794943
Adamts16	1.35201	8.78209	1.62692	21.0093	34.9989	55.2862	16.1188	3.37704	5.81431e-06	0.000210857
Adamts17	97.3449	138.757	60.1961	177.624	173.199	234.629	117.922	0.884675	0.000486199	0.00802688
Adamts18	177.114	765.798	124.46	916.769	767.283	939.866	732.983	1.69061	9.24956e-14	2.02742e-11
Adamts19	0	22.8334	2.44038	42.9736	45.7677	49.8924	33.9344	3.75094	2.63627e-06	0.000103677
Adamts2	283.923	1125.86	601.148	1224.27	1255.47	1368.67	1468.51	1.17035	5.60982e-18	2.61295e-15
Adamts20	104.105	278.392	76.4653	227.282	257.556	237.326	217.18	0.829454	6.55069e-05	0.00158247
Adamts3	425.884	384.655	303.421	391.537	437.934	451.729	269.778	0.0629524	0.731188	0.914522
Adamts4	63.5446	180.911	26.0308	230.147	226.146	292.612	188.336	1.76441	1.55007e-10	1.80499e-08
Adamts5	1268.19	1601.85	1432.5	1907.07	1645.84	2675.31	2975.2	0.680414	0.0012241	0.0167849
Adamts6	56.7845	49.1797	32.5384	54.4332	59.2288	51.2409	42.418	0.207523	0.533458	0.812008
Adamts7	264.995	381.143	192.79	333.284	292.555	314.187	263.84	0.157212	0.415771	0.731389
Adamts8	75.7127	161.59	69.1442	142.29	83.4588	141.587	76.3524	0.218063	0.515687	0.801158
Adamts9	936.945	1118.84	530.377	1192.75	1223.17	1394.29	1108.81	0.574939	7.06454e-05	0.00168745
Adamtsl1	327.187	189.693	268.442	265.481	244.992	249.462	270.627	0.0243189	0.883156	0.968709
Adamtsl2	5.40805	3.51283	12.2019	9.54968	4.48703	8.09066	5.93852	0.146712	0.861158	NA
Adamtsl3	102.753	115.045	70.7711	67.8027	105.894	94.3911	104.348	-0.0199313	0.941586	0.983761
Adamtsl4	240.658	257.315	270.069	200.543	251.274	385.655	259.598	0.0783795	0.747549	0.921867
Adamtsl5	81.1208	121.193	98.4288	117.461	161.533	179.343	171.369	0.653159	0.00741831	0.0645852
Adap1	160.89	122.071	104.936	122.236	160.636	142.935	220.573	0.353029	0.215331	0.540866
Adap2	229.842	165.103	247.292	160.435	199.224	256.204	242.631	0.0274294	0.907877	0.97518
Adar	1011.31	761.407	785.803	711.451	785.231	742.993	706.683	-0.193529	0.108161	0.370948
Adarb1	321.779	222.187	205.806	176.669	219.865	262.947	233.299	-0.131881	0.499798	0.791237
Adarb2	5.40805	15.8078	3.25384	19.0994	5.38444	10.7876	13.5738	0.838289	0.29935	0.631056
Adat1	198.746	103.629	117.138	113.641	123.842	113.269	72.1106	-0.341933	0.167561	0.477717
Adat2	63.5446	33.3719	39.0461	45.8385	34.1014	56.6347	44.9631	0.0654843	0.855648	0.961116
Adat3	22.9842	29.8591	26.0308	21.9643	43.9729	33.7111	39.8729	0.40509	0.358974	0.685436
Adck1	160.89	165.981	213.94	183.354	158.841	134.844	190.033	-0.107108	0.579228	0.840187
Adck2	332.595	187.058	199.298	200.543	241.402	199.57	157.795	-0.205192	0.290828	0.622547
Adck3	600.294	608.599	382.327	245.427	1155.86	211.706	313.045	-0.194583	0.800497	0.940496
Adck4	201.45	173.007	171.64	187.174	171.405	186.085	168.824	-0.02276	0.903501	0.974941
Adck5	264.995	195.841	175.708	218.688	221.659	218.448	171.369	-0.00610885	0.973864	0.994004
Adcy1	35.1523	75.5259	19.5231	28.649	66.4081	64.7253	25.4508	0.191906	0.604101	0.853813
Adcy10	16.2242	53.5707	32.5384	47.7484	60.1262	26.9689	70.4138	0.719271	0.0783641	0.308999
Adcy2	29.7443	33.3719	41.4865	35.3338	69.1003	20.2267	57.6884	0.401533	0.407627	0.725282
Adcy3	191.986	372.36	173.267	319.914	350.886	347.899	341.041	0.543005	0.000781889	0.0117206
Adcy4	385.324	268.732	192.79	199.588	244.095	327.672	231.602	-0.123281	0.502724	0.79388
Adcy5	516.469	674.464	263.561	433.555	446.011	730.857	792.368	0.406886	0.137239	0.4258
Adcy6	2576.94	1932.06	1538.25	1716.08	1919.55	2176.39	1758.65	-0.0577386	0.600698	0.852801
Adcy7	521.877	802.683	759.773	962.608	1157.65	1410.47	1167.34	0.766875	1.43576e-05	0.000451477
Adcy8	5.40805	1.75642	0	2.8649	3.58963	5.39378	1.69672	1.30967	0.340297	NA
Adcy9	820.672	532.194	597.894	481.304	543.828	569.043	570.098	-0.230884	0.107655	0.370066
Adcyap1r1	127.089	391.681	235.904	447.88	488.189	575.786	501.38	1.11381	5.64854e-10	5.76078e-08
Add1	1330.38	1777.49	1559.4	1772.42	1768.79	1792.08	1681.45	0.176713	0.108239	0.371131
Add2	2.70403	5.26925	1.62692	5.72981	8.97407	1.34844	5.09016	0.893532	0.42652	NA
Add3	781.464	966.908	1040.42	1221.4	1065.22	1065.27	1015.49	0.23718	0.0754403	0.301296
Adgb	43.2644	27.2245	44.7404	20.0543	29.6144	40.4533	49.2048	-0.0982133	0.828845	0.952099
Adgra2	758.479	955.491	1181.15	979.797	844.46	1117.86	704.138	-0.0662835	0.750452	0.922957
Adgra3	212.266	540.977	301.794	561.521	653.312	633.769	536.163	0.845947	4.16824e-08	2.67792e-06
Adgrb1	2.70403	14.0513	1.62692	1.90994	5.38444	9.43911	3.39344	0.158481	0.873537	NA
Adgrb2	21.6322	70.2567	34.1654	60.163	57.434	102.482	52.5983	0.807595	0.0318696	0.176783
Adgrb3	8.11208	0	1.62692	3.81987	5.38444	0	0	0.882671	0.640846	NA
Adgrd1	127.089	419.784	261.121	413.501	543.828	631.072	580.278	1.13334	3.16498e-08	2.06e-06
Adgre1	252.826	456.668	579.998	579.665	520.496	501.621	628.634	0.433137	0.00412728	0.0421928
Adgre4	43.2644	36.8848	36.6057	61.1179	87.0484	63.3769	86.5327	0.9514	0.00407337	0.0417276
Adgre5	527.285	506.726	450.657	596.855	540.239	711.978	643.905	0.335691	0.0316003	0.175608
Adgrf1	52.7285	6.14746	16.2692	12.4146	4.48703	5.39378	6.78688	-1.23375	0.0671515	0.280992
Adgrf2	5.40805	8.78209	4.88077	2.8649	8.97407	6.74222	0	-0.690769	0.547104	NA
Adgrf3	8.11208	0.878209	4.88077	0	1.79481	2.69689	3.39344	-0.679517	0.629935	NA
Adgrf4	18.9282	19.3206	4.88077	13.3695	22.4352	16.1813	10.1803	0.304409	0.606595	0.855115
Adgrf5	2575.58	1694.06	1345.46	1918.53	1912.37	2076.6	1876.57	0.118521	0.381063	0.704946
Adgrg1	855.824	766.676	840.305	636.009	567.161	822.551	480.171	-0.398041	0.0382985	0.198139
Adgrg2	171.706	131.731	133.408	105.046	154.354	151.026	133.192	-0.0909363	0.684331	0.894991
Adgrg3	54.0805	50.9361	44.7404	42.0186	78.9718	43.1502	48.3565	0.0932895	0.799766	0.940252
Adgrg5	24.3362	18.4424	27.6577	35.3338	22.4352	26.9689	32.2377	0.331401	0.444399	0.753386
Adgrg6	171.706	407.489	130.154	325.644	318.579	257.553	299.471	0.512143	0.0213943	0.136216
Adgrg7	2.70403	3.51283	4.06731	0	5.38444	2.69689	0.848359	-0.883691	0.550435	NA
Adgrl1	611.11	963.395	515.734	855.651	865.997	1171.8	774.552	0.429254	0.0052104	0.0497248
Adgrl2	927.481	819.369	876.098	877.615	897.407	934.472	765.22	-0.00796352	0.950472	0.986313
Adgrl3	444.812	490.919	378.259	446.925	351.783	567.695	441.995	0.0497022	0.79836	0.939892
Adgrl4	535.397	431.2	387.207	505.178	566.264	481.395	587.065	0.266109	0.10709	0.369057
Adgrv1	9.46409	6.14746	2.44038	1.90994	8.07666	4.04533	0	-0.873654	0.462512	NA
Adh1	247.418	245.02	309.929	259.751	208.198	250.811	408.061	0.0630446	0.783487	0.936381
Adh5	479.965	668.317	664.598	764.929	594.981	546.12	673.597	0.0965073	0.496487	0.789178
Adh6-ps1	0	1.75642	1.62692	0	1.79481	2.69689	1.69672	0.614326	0.758239	NA
Adh7	16.2242	8.78209	35.7923	24.8292	18.8455	13.4844	46.6598	0.518601	0.317651	0.647594
Adhfe1	267.699	520.778	237.531	372.437	481.01	438.244	718.56	0.623103	0.0105901	0.0835607
Adi1	200.098	210.77	220.448	200.543	196.532	190.131	220.573	-0.0593201	0.738403	0.917335
Adig	248.77	417.149	229.396	281.716	525.88	252.159	648.995	0.53985	0.265738	0.599954
Adipoq	4229.1	7323.38	4088.46	5545.5	7023.1	7014.61	13307.4	0.675607	0.098378	0.353928
Adipor1	1066.74	1174.16	1166.5	1134.5	1386.49	1198.77	1325.99	0.150502	0.251454	0.584382
Adipor2	3010.93	4669.44	2432.25	3447.43	4906.12	3594.95	5568.63	0.417886	0.0340979	0.184753
Adk	525.933	568.201	661.344	743.92	533.957	512.409	674.446	0.0667412	0.651354	0.878453
Adm	16.2242	58.84	30.0981	59.208	56.5366	70.1191	47.5081	0.881037	0.0161642	0.111541
Adnp	40.5604	19.3206	26.8442	18.1444	29.6144	33.7111	22.0573	-0.108785	0.805909	0.942937
Adnp2	319.075	298.591	331.079	354.293	310.503	295.309	268.082	-0.040712	0.814671	0.946461
Ado	373.156	540.098	497.025	517.593	505.24	509.712	494.594	0.116553	0.40323	0.722744
Adora1	321.779	260.828	275.763	311.32	276.401	233.281	274.02	-0.0527068	0.769307	0.930512
Adora2a	54.0805	48.3015	51.248	39.1537	66.4081	47.1955	29.6926	-0.191729	0.616974	0.860725
Adora2b	5.40805	12.2949	12.2019	33.4239	23.3326	17.5298	11.0287	1.16159	0.0756814	0.301969
Adora3	0	5.26925	8.13461	4.77484	3.58963	0	4.2418	0.234412	0.861885	NA
Adpgk	321.779	297.713	268.442	304.635	326.656	335.763	346.979	0.157229	0.322721	0.651917
Adprh	108.161	214.283	157.811	225.372	241.402	190.131	268.082	0.571004	0.00292071	0.0331808
Adprhl1	31.0963	15.8078	14.6423	15.2795	55.6392	10.7876	13.5738	0.262481	0.692642	0.897697
Adprhl2	262.291	224.821	212.313	199.588	156.149	177.995	215.483	-0.309079	0.139135	0.429359
Adprm	100.049	95.7247	87.8538	90.7219	96.0225	99.7849	116.225	0.0963399	0.699907	0.901963
Adra1a	466.444	634.945	270.883	501.358	327.553	411.275	367.34	-0.103576	0.671406	0.888762
Adra1b	0	1.75642	3.25384	9.54968	7.17925	6.74222	3.39344	2.33178	0.0600975	NA
Adra1d	21.6322	25.468	4.88077	20.0543	17.9481	47.1955	15.2705	0.739422	0.183677	0.502551
Adra2a	29.7443	63.231	24.4038	42.0186	75.3821	53.9378	40.7213	0.527784	0.139401	0.429736
Adra2b	13.5201	8.78209	6.50769	3.81987	5.38444	0	5.09016	-1.32834	0.19793	NA
Adra2c	13.5201	1.75642	4.88077	1.90994	1.79481	0	3.39344	-1.4121	0.263828	NA
Adrb1	67.6007	79.917	59.3827	51.5683	61.0236	82.2551	44.1147	-0.232573	0.455977	0.762562
Adrb2	183.874	128.218	105.75	89.767	153.457	160.465	128.102	-0.0397411	0.867085	0.964816
Adrb3	2068.58	1566.72	561.288	948.283	1737.38	1697.69	1565.22	0.276968	0.203443	0.528338
Adrbk1	1068.09	906.311	1113.63	864.246	839.973	941.214	1001.91	-0.16696	0.200797	0.524513
Adrbk2	1454.77	717.496	1058.31	768.749	816.64	730.857	634.573	-0.474326	0.000343848	0.00605083
Adrm1	208.21	288.931	266.002	274.076	218.967	253.507	284.2	0.0213844	0.901915	0.974754
Adsl	429.94	517.265	549.086	439.285	448.703	430.154	480.171	-0.147455	0.282998	0.616408
Adss	858.528	908.068	775.228	774.479	631.774	621.633	531.073	-0.402515	0.0183839	0.122134
Adssl1	86.5288	179.155	152.931	37.2437	286.273	33.7111	227.36	0.0871567	0.931581	0.980752
Adtrp	47.3205	71.1349	20.3365	32.4689	41.2807	13.4844	17.8155	-0.634012	0.222976	0.550059
Aebp1	949.113	1668.6	1915.7	1551.82	1927.63	1821.75	1889.3	0.300356	0.0804958	0.313343
Aebp2	989.674	801.804	898.874	862.336	806.768	798.279	656.63	-0.191398	0.178931	0.495664
Aen	136.553	164.225	171.64	149.93	90.6381	121.36	151.008	-0.307831	0.198083	0.521362
Aes	689.527	1166.26	1103.87	1135.46	1055.35	1084.15	1257.27	0.222541	0.0559483	0.249786
AF251705	25.6882	36.8848	102.496	59.208	68.2029	63.3769	68.7171	0.459379	0.227788	0.557143
AF357355	0	2.63463	1.62692	0.954968	1.79481	0	2.54508	0.235228	0.903861	NA
AF357359	2.70403	6.14746	9.76153	3.81987	11.6663	17.5298	16.1188	1.06617	0.213012	0.538679
AF357399	9.46409	6.14746	5.69423	9.54968	7.17925	8.09066	4.2418	0.0687569	0.932478	NA
AF357425	0	3.51283	0	0	4.48703	2.69689	4.2418	2.34631	0.226755	NA
AF529169	44.6164	136.122	27.6577	124.146	130.124	134.844	101.803	1.1238	6.948e-05	0.00166605
Afap1	1281.71	1265.5	1160.81	1113.49	1337.14	1359.23	1377.74	0.0700035	0.587634	0.844869
Afap1l1	358.283	247.655	221.261	249.247	247.684	256.204	285.049	-0.0449795	0.813063	0.94547
Afap1l2	150.073	427.688	182.215	369.573	376.013	399.139	429.27	0.773941	1.47654e-06	6.31747e-05
Aff1	1576.45	1290.09	1551.27	1083.89	1196.24	1312.04	981.552	-0.361829	0.00980976	0.0790776
Aff2	18.9282	19.3206	30.9115	22.9192	40.3833	39.1049	28.8442	0.510921	0.281825	0.615293
Aff3	98.697	117.68	117.952	179.534	145.38	184.737	150.16	0.561694	0.0125819	0.0944152
Aff4	2989.3	3439.06	2949.61	3354.8	3167.85	3284.81	3151.66	0.0526753	0.606099	0.855115
Afg3l1	451.572	422.418	375.006	517.593	482.805	471.955	400.426	0.175037	0.268151	0.6031
Afg3l2	767.943	617.381	579.184	486.079	585.109	532.635	530.225	-0.27983	0.0400899	0.20434
Afmid	100.049	38.6412	61.0096	40.1086	40.3833	39.1049	30.5409	-0.703802	0.0309983	0.173305
Aftph	1404.74	1035.41	1228.33	1095.35	966.507	984.364	977.31	-0.265027	0.0243722	0.148511
Aga	121.681	187.058	181.402	163.299	171.405	159.116	224.815	0.149381	0.468642	0.772286
Agap1	1165.44	1031.9	1016.01	967.382	1172.01	1286.42	913.683	0.0114499	0.9341	0.981764
Agap2	68.9527	94.8465	72.398	65.8928	75.3821	128.102	71.2622	0.0861519	0.783687	0.936381
Agap3	646.262	690.272	575.117	511.863	451.395	567.695	504.774	-0.322474	0.0291273	0.166594
Agbl1	62.1926	17.5642	36.6057	0	105.894	0	24.6024	-0.169374	0.946984	0.985452
Agbl2	5.40805	1.75642	14.6423	6.68477	8.07666	14.8329	10.1803	0.867658	0.310319	0.640104
Agbl3	67.6007	57.0836	66.7038	65.8928	75.3821	82.2551	55.1434	0.118059	0.691022	0.896882
Agbl5	462.388	258.193	357.109	296.995	286.273	342.505	274.02	-0.213427	0.176263	0.491433
Ager	37.8564	23.7116	19.5231	4.77484	29.6144	26.9689	30.5409	-0.190249	0.760738	0.926717
Agfg1	661.134	626.163	894.807	869.976	619.211	709.282	677.839	-0.00316662	0.983382	0.99776
Agfg2	117.625	134.366	130.154	139.425	136.406	140.238	209.545	0.290566	0.231082	0.560956
Aggf1	577.31	539.22	543.392	477.484	472.036	507.015	430.118	-0.230716	0.0927785	0.340859
Agk	102.753	144.904	122.833	128.921	116.663	142.935	134.041	0.0844431	0.701382	0.902348
Agl	838.248	975.69	984.288	765.884	1384.7	647.253	1186.85	0.0928693	0.714372	0.907677
Agmo	277.163	210.77	192.79	212.003	268.325	262.947	309.651	0.240351	0.249291	0.582647
Ago1	1084.31	1101.27	1045.3	987.437	1003.3	1058.53	797.458	-0.167319	0.228983	0.558225
Ago2	1127.58	1137.28	1114.44	921.544	1156.76	1119.21	904.351	-0.142665	0.299042	0.630888
Ago3	750.367	556.784	562.915	510.908	557.289	651.298	557.372	-0.11444	0.404336	0.723235
Ago4	309.611	266.097	187.096	295.085	284.478	324.975	218.877	0.170163	0.356654	0.684022
Agpat1	351.523	470.72	398.596	318.004	402.936	357.338	486.958	-0.053788	0.773731	0.93267
Agpat2	651.67	2139.32	1439.01	2387.42	2949.78	1508.91	4011.89	1.03681	2.79636e-06	0.000108824
Agpat3	819.32	1097.76	632.873	817.452	946.764	930.426	1030.76	0.162956	0.271621	0.605429
Agpat4	59.4886	61.4746	67.5173	88.812	107.689	98.4364	89.0777	0.606758	0.0233241	0.144852
Agpat5	160.89	279.27	265.188	245.427	245.889	253.507	296.077	0.170851	0.326122	0.654903
Agpat6	1345.25	1318.19	1217.75	1172.7	1058.04	1034.26	1162.25	-0.223907	0.074059	0.298742
Agpat9	417.772	376.751	309.929	405.861	562.674	434.199	777.097	0.574143	0.0242873	0.14824
Agps	1840.09	1431.48	2080.83	1707.48	1421.49	1228.43	1211.46	-0.338978	0.0246306	0.149236
Agrn	3050.14	3600.66	2254.91	2562.18	2772.99	3207.95	2114.96	-0.14326	0.253068	0.586332
Agrp	9.46409	7.90388	10.575	4.77484	6.28185	2.69689	11.0287	-0.58949	0.482656	NA
Agt	113.569	44.7886	72.398	38.1987	59.2288	102.482	154.401	0.330441	0.48467	0.782325
Agtpbp1	866.64	562.054	535.257	581.575	714.336	671.525	731.286	0.0899081	0.571633	0.836549
Agtr1a	1314.16	1380.54	549.086	1330.27	836.383	1027.51	885.687	0.0359832	0.926862	0.979862
Agtr2	0	3.51283	0	30.559	12.5637	10.7876	6.78688	4.67892	0.000340006	0.00600449
Agtrap	333.947	463.694	365.244	440.24	420.884	419.366	386.852	0.112434	0.44942	0.757332
Agxt2	16.2242	4.39104	5.69423	5.72981	1.79481	1.34844	0.848359	-1.61114	0.144524	NA
Ahctf1	1865.78	1584.29	1958.81	1469.7	1446.62	1433.4	1385.37	-0.322002	0.00294611	0.033317
Ahcy	133.849	230.969	183.842	244.472	180.379	240.023	163.733	0.2017	0.400883	0.721985
Ahcyl1	1496.68	1673.87	1356.04	1290.16	1626.1	1399.68	1253.03	-0.11645	0.352767	0.681441
Ahcyl2	1207.35	1308.53	974.526	1038.05	1215.99	1361.93	1963.1	0.265668	0.234182	0.565719
Ahdc1	832.84	1024.87	774.415	593.99	615.621	823.899	587.065	-0.424264	0.00538903	0.0508055
Ahi1	155.481	171.251	106.563	167.119	192.045	186.085	180.701	0.357487	0.0720837	0.293932
Ahnak	31460	35015.9	28674.5	32722	32478.9	38707.1	37929.3	0.16334	0.169348	0.481062
Ahr	615.166	1076.68	587.319	904.355	923.431	923.684	720.257	0.237803	0.104795	0.364522
Ahrr	0	12.2949	6.50769	3.81987	12.5637	14.8329	21.209	1.83282	0.0670042	0.28077
Ahsa1	392.084	709.593	724.794	790.713	590.493	624.33	749.95	0.209599	0.117747	0.389745
Ahsa2	250.122	245.02	245.665	236.832	269.222	277.779	279.959	0.106455	0.532508	0.811358
AI118078	0	3.51283	4.88077	4.77484	3.58963	13.4844	0	1.35075	0.388192	NA
AI182371	8.11208	7.02567	10.575	5.72981	4.48703	4.04533	5.93852	-0.747312	0.367875	NA
AI197445	28.3923	14.9295	17.0827	3.81987	3.58963	2.69689	3.39344	-2.48776	0.000889006	0.0129527
AI314180	2522.86	2054.13	2272	2009.25	2283	1982.21	1979.22	-0.136582	0.233309	0.564341
AI317395	0	14.0513	0.813461	8.59471	17.9481	6.74222	8.48359	2.77567	0.0136929	NA
AI413582	22.9842	39.5194	87.0403	66.8477	47.5625	37.7564	66.172	0.277496	0.397413	0.719214
AI414108	54.0805	72.0131	58.5692	78.3074	52.0496	67.4222	45.8114	-0.0139418	0.967173	0.990938
AI427809	12.1681	14.9295	13.0154	3.81987	4.48703	8.09066	3.39344	-1.49505	0.0552978	0.248193
AI429214	37.8564	32.4937	30.0981	36.2888	41.2807	39.1049	45.8114	0.29359	0.428353	0.740656
AI450353	21.6322	6.14746	26.0308	24.8292	28.717	20.2267	20.3606	0.645695	0.214919	0.540437
AI463170	41.9124	14.0513	24.4038	22.9192	21.5378	9.43911	12.7254	-0.513596	0.34535	0.674175
AI464131	209.562	272.245	227.769	190.039	290.76	223.842	312.196	0.106998	0.635319	0.870992
AI467606	8.11208	26.3463	40.6731	24.8292	48.46	45.8471	49.2048	0.944918	0.0652074	0.275799
AI504432	40.5604	17.5642	59.3827	46.7934	48.46	53.9378	32.2377	0.36718	0.372996	0.697228
AI506816	21.6322	28.9809	43.1134	51.5683	25.1274	32.3627	44.1147	0.308686	0.435176	0.746721
AI507597	2.70403	1.75642	1.62692	1.90994	1.79481	0	1.69672	-0.538711	0.744476	NA
AI593442	2.70403	0	0	1.90994	3.58963	0	3.39344	2.58337	0.232419	NA
AI597479	247.418	334.597	322.944	404.906	328.451	303.4	412.303	0.263725	0.0993704	0.355658
AI606473	8.11208	17.5642	8.13461	11.4596	24.23	21.5751	38.1762	1.16897	0.0582157	0.256312
AI607873	237.954	220.43	398.596	250.202	319.477	287.219	359.704	0.141788	0.509848	0.798071
AI661453	146.017	176.52	152.931	115.551	111.278	132.148	44.9631	-0.679731	0.0513886	0.238539
AI662270	54.0805	57.0836	78.0923	81.1723	72.6899	64.7253	92.4712	0.312872	0.254565	0.58817
AI837181	95.9929	145.783	116.325	169.029	143.585	163.162	158.643	0.42094	0.0455941	0.221696
AI839979	8.11208	8.78209	8.94807	6.68477	6.28185	6.74222	6.78688	-0.381624	0.620639	NA
AI846148	237.954	223.065	170.827	153.75	175.892	183.388	145.069	-0.346581	0.0581905	0.256305
AI854703	18.9282	8.78209	4.88077	7.63974	12.5637	5.39378	5.09016	-0.275816	0.718587	0.909435
AI987944	189.282	154.565	181.402	221.553	167.815	173.949	208.696	0.146219	0.459505	0.765405
Aicda	0	1.75642	1.62692	1.90994	1.79481	2.69689	0	0.717061	0.720443	NA
Aida	269.051	358.309	309.929	424.006	353.578	400.488	450.479	0.383852	0.0152047	0.106798
Aif1	73.0087	84.308	141.542	124.146	88.8432	94.3911	161.188	0.260119	0.286301	0.618314
Aif1l	93.2889	156.321	77.2788	228.237	132.816	126.754	180.701	0.655288	0.0311262	0.173889
Aifm1	269.051	346.892	314.809	381.987	350.886	326.323	332.557	0.168257	0.287622	0.619685
Aifm2	628.686	911.581	520.615	692.352	787.923	767.265	1030.76	0.284737	0.125247	0.404595
Aifm3	33.8003	15.8078	34.9788	21.9643	12.5637	22.9235	11.0287	-0.646223	0.218354	0.544151
Aig1	100.049	71.1349	100.056	91.6769	110.381	68.7706	61.0819	-0.0999057	0.748536	0.921867
Aim1	1599.43	1845.12	1609.03	1716.08	1338.03	1595.21	989.187	-0.257334	0.191791	0.513589
Aim1l	50.0245	22.8334	47.9942	11.4596	8.97407	17.5298	21.209	-1.35587	0.00742331	0.064591
Aim2	47.3205	49.1797	56.1288	75.4425	70.8951	66.0738	95.8646	0.600051	0.0415686	0.209082
Aimp1	296.091	376.751	399.409	422.096	364.347	258.901	346.979	-0.0368927	0.842995	0.957483
Aimp2	105.457	163.347	193.604	200.543	131.021	122.708	168.824	0.0313212	0.882332	0.968709
Aip	177.114	216.918	228.583	240.652	208.198	202.267	267.233	0.145248	0.412192	0.72862
Aire	25.6882	0	17.8961	5.72981	0	8.09066	1.69672	-0.244722	0.845814	NA
Airn	356.931	230.091	159.438	134.65	206.404	235.978	197.668	-0.28745	0.179868	0.497021
Ajuba	323.131	535.707	290.406	460.294	403.833	547.468	350.372	0.240169	0.204641	0.528994
AK010878	60.8406	57.0836	42.3	33.4239	40.3833	39.1049	59.3852	-0.286844	0.449362	0.75732
Ak1	278.515	480.38	481.569	200.543	671.26	198.221	765.22	0.153834	0.827348	0.951588
Ak2	1080.26	1217.2	1107.12	1035.19	1107.4	1019.42	1627.15	0.066563	0.720732	0.910209
Ak3	896.385	1342.78	1218.56	1441.05	1424.18	1363.28	1682.3	0.36763	0.001265	0.0172191
Ak4	48.6725	90.4555	88.6673	136.56	83.4588	113.269	89.0777	0.509303	0.0897363	0.334631
Ak5	16.2242	25.468	21.9634	21.9643	24.23	14.8329	22.0573	-0.00952111	0.984541	0.997982
Ak6	66.2486	85.1862	91.9211	91.6769	68.2029	88.9973	107.742	0.13533	0.61538	0.859709
Ak7	5.40805	5.26925	9.76153	1.90994	1.79481	4.04533	4.2418	-1.15433	0.26167	NA
Ak8	2.70403	3.51283	3.25384	1.90994	6.28185	4.04533	5.09016	0.445716	0.686282	NA
Akap1	1169.49	962.517	950.122	935.868	821.127	768.613	729.589	-0.32527	0.0251743	0.151605
Akap10	671.95	533.951	518.175	530.007	522.291	502.97	482.717	-0.157834	0.245866	0.579023
Akap11	1489.92	1373.52	1330.82	1316.9	1382.9	1441.49	1377.74	-0.0161311	0.880871	0.967886
Akap12	723.327	1138.16	667.852	1271.06	1324.57	1670.72	1531.29	0.81215	1.06677e-08	7.85041e-07
Akap13	2425.51	2374.68	1975.9	2029.31	2588.12	2584.97	2244.76	0.0651956	0.555976	0.826698
Akap14	1.35201	5.26925	4.06731	3.81987	3.58963	0	3.39344	-0.242003	0.855866	NA
Akap17b	304.203	195.841	256.24	187.174	176.789	209.009	167.127	-0.419759	0.0202688	0.130952
Akap2	8.11208	3.51283	3.25384	1.90994	0.897407	6.74222	0.848359	-0.99489	0.418247	NA
Akap5	37.8564	53.5707	55.3154	32.4689	59.2288	51.2409	45.8114	-0.0579237	0.876682	0.966998
Akap6	173.058	92.2119	89.4807	49.6583	261.145	68.7706	94.1679	0.0199932	0.977511	0.995936
Akap7	406.956	388.168	353.856	396.312	484.6	408.579	410.606	0.154148	0.310502	0.640237
Akap8	2576.94	1282.18	1504.09	1301.62	1290.47	1518.35	1347.19	-0.309295	0.0128914	0.0955957
Akap8l	1310.1	598.938	670.292	617.864	727.797	697.146	682.081	-0.227311	0.113637	0.382164
Akap9	4253.43	3237.96	2978.89	2596.56	3005.41	2990.85	2601.92	-0.298798	0.00222325	0.0271842
Akip1	58.1366	77.2824	104.936	72.5776	61.0236	53.9378	81.4425	-0.231568	0.393184	0.715556
Akirin1	135.201	328.45	309.115	359.068	290.76	275.083	453.024	0.483587	0.00309657	0.0345195
Akirin2	260.939	339.867	322.944	334.239	319.477	318.233	370.733	0.126811	0.404349	0.723235
Akna	498.893	317.912	382.327	294.13	362.552	408.579	298.623	-0.207967	0.202423	0.526638
Aknad1	2.70403	10.5385	1.62692	1.90994	15.2559	8.09066	6.78688	1.0261	0.291822	NA
Akr1a1	1769.79	2529.24	2237.83	2748.4	2346.72	2313.93	2941.26	0.249622	0.0276437	0.160949
Akr1b10	191.986	157.199	204.179	210.093	151.662	142.935	213.787	-0.0388108	0.852724	0.960148
Akr1b8	85.1768	108.898	108.19	168.074	152.559	115.966	158.643	0.565778	0.0128782	0.0955922
Akr1c12	4.05604	6.14746	3.25384	9.54968	7.17925	8.09066	11.877	1.07539	0.196285	NA
Akr1c13	27.0403	28.1027	23.5904	49.6583	28.717	35.0595	35.6311	0.504721	0.232582	0.563236
Akr1c14	87.8808	68.5003	111.444	91.6769	119.355	71.4675	167.127	0.353008	0.271089	0.604967
Akr1c18	10.8161	34.2501	26.8442	29.604	66.4081	43.1502	59.3852	1.15419	0.0113045	0.0872568
Akr1c19	4.05604	3.51283	1.62692	3.81987	3.58963	0	0	-0.597721	0.725816	NA
Akr1c21	5.40805	3.51283	6.50769	1.90994	4.48703	0	0.848359	-1.41784	0.297653	NA
Akr1cl	13.5201	22.8334	18.7096	6.68477	3.58963	26.9689	36.4795	0.00189038	0.998125	0.999531
Akr1e1	191.986	206.379	226.956	247.337	195.635	177.995	240.934	0.0434708	0.815457	0.946946
Akr7a5	106.809	196.719	165.946	157.57	131.919	188.782	160.34	0.0542693	0.812544	0.945429
Akt1	1366.89	1543.89	1688.75	1606.26	1241.11	1552.06	1444.76	-0.0682606	0.616416	0.860514
Akt1s1	189.282	215.161	257.054	190.994	213.583	277.779	248.569	0.0794312	0.716456	0.908601
Akt2	828.784	1074.05	963.138	1050.46	1158.55	1042.35	1559.28	0.327735	0.0484557	0.230524
Akt3	696.287	721.887	548.273	722.911	808.563	818.506	696.503	0.223482	0.063633	0.271744
Aktip	352.875	352.162	375.819	393.447	370.629	350.595	476.778	0.140575	0.390578	0.712903
Alad	324.483	345.136	360.363	292.22	544.726	276.431	359.704	0.0987006	0.702276	0.902754
Alas1	639.502	740.33	680.867	657.973	607.544	577.134	767.765	-0.0781908	0.591393	0.846999
Alas2	110.865	184.424	112.258	209.138	288.067	160.465	330.012	0.887393	0.00136631	0.0184465
Alb	27.0403	28.1027	24.4038	156.615	53.8444	82.2551	166.278	2.03166	1.45491e-06	6.24941e-05
Alcam	986.97	1290.97	847.626	1245.28	1250.98	1341.7	1283.57	0.314809	0.00831841	0.0700485
Aldh16a1	270.403	269.61	287.965	329.464	239.608	242.72	219.725	-0.0996777	0.623453	0.864264
Aldh18a1	666.542	579.618	920.838	709.541	513.317	566.347	458.114	-0.336307	0.0698356	0.288178
Aldh1a1	283.923	367.969	379.886	388.672	493.574	505.667	805.093	0.669263	0.00502167	0.0484139
Aldh1a2	0	12.2949	13.0154	17.1894	25.1274	24.272	12.7254	1.81503	0.026898	0.158277
Aldh1a3	95.9929	1091.61	148.05	440.24	419.089	628.375	495.442	0.942235	3.19254e-06	0.000122326
Aldh1a7	156.834	430.322	267.629	573.936	662.286	520.499	1059.6	1.37748	2.15652e-10	2.41676e-08
Aldh1b1	2.70403	17.5642	9.76153	26.7391	8.97407	16.1813	10.1803	0.935163	0.207404	0.53171
Aldh1l1	598.942	778.971	666.225	835.597	992.532	852.217	1421.85	0.582466	0.00345352	0.0373005
Aldh1l2	109.513	133.488	110.631	173.804	184.866	234.629	145.918	0.633019	0.00552094	0.0517219
Aldh2	913.961	1762.56	1598.45	1959.59	1999.42	1545.32	2242.21	0.476945	0.000149962	0.00311742
Aldh3a1	4.05604	8.78209	19.5231	3.81987	0	2.69689	3.39344	-2.02538	0.0553492	NA
Aldh3a2	519.173	757.016	481.569	679.937	708.054	575.786	615.909	0.162928	0.286605	0.618391
Aldh3b1	47.3205	79.0388	69.9576	81.1723	70.8951	79.5582	67.8688	0.209437	0.464159	0.76887
Aldh3b2	59.4886	36.8848	34.1654	46.7934	51.1522	24.272	60.2335	0.120578	0.780032	0.935037
Aldh4a1	338.003	523.412	488.077	443.105	671.26	489.485	603.184	0.308214	0.110314	0.37471
Aldh5a1	242.01	248.533	188.723	208.183	230.633	188.782	224.815	-0.072406	0.706705	0.904563
Aldh6a1	1653.51	1981.24	1361.73	1841.18	2353	1673.42	2499.27	0.33951	0.0609477	0.264616
Aldh7a1	704.399	846.593	681.68	817.452	731.386	761.871	777.946	0.0567918	0.661532	0.884272
Aldh9a1	484.021	482.137	421.373	426.871	532.162	416.669	426.725	-0.0336681	0.830381	0.952797
Aldoa	3654.49	8918.21	7038.88	5743.18	9439.82	4159.95	13248.8	0.34494	0.488359	0.784205
Aldoart1	5.40805	5.26925	1.62692	3.81987	8.97407	0	3.39344	0.186022	0.883645	NA
Aldoc	907.201	508.483	1238.09	704.766	306.016	471.955	413.151	-0.823815	0.000226443	0.00429953
Alg1	123.033	163.347	161.879	123.191	139.098	146.98	176.459	-0.0259925	0.907505	0.97518
Alg10b	494.837	533.951	516.548	584.44	588.699	498.924	513.257	0.0851751	0.55832	0.828743
Alg11	329.891	318.79	335.959	350.473	324.861	343.853	370.733	0.0828599	0.583368	0.84243
Alg12	135.201	105.385	109.004	103.137	141.79	137.541	136.586	0.167431	0.472703	0.775691
Alg13	216.322	134.366	167.573	174.759	192.045	169.904	156.098	0.0408002	0.832972	0.954019
Alg14	110.865	153.687	116.325	158.525	144.482	110.572	130.647	0.112241	0.634152	0.870173
Alg2	235.25	226.578	228.583	236.832	224.352	264.295	229.905	0.0512659	0.767753	0.929626
Alg3	75.7127	60.5964	65.8903	94.5418	73.5873	62.0284	55.9917	0.0969911	0.758438	0.925859
Alg5	185.226	227.456	245.665	266.436	235.121	172.601	311.348	0.157683	0.43728	0.748382
Alg6	128.441	138.757	198.484	225.372	172.302	141.587	151.856	0.171803	0.456715	0.763155
Alg8	136.553	94.8465	150.49	111.731	104.099	95.7395	97.5613	-0.283669	0.211032	0.537051
Alg9	277.163	272.245	259.494	341.878	260.248	266.992	302.016	0.117374	0.516487	0.801565
Alk	1.35201	18.4424	3.25384	2.8649	11.6663	9.43911	0.848359	0.103692	0.921182	NA
Alkbh1	301.499	275.758	293.659	247.337	247.684	222.493	246.873	-0.263286	0.108788	0.371894
Alkbh2	63.5446	39.5194	69.1442	49.6583	58.3314	45.8471	49.2048	-0.127199	0.692477	0.897697
Alkbh3	246.066	173.007	189.536	194.813	172.302	183.388	201.91	-0.0840274	0.661617	0.884272
Alkbh4	63.5446	48.3015	42.3	61.1179	55.6392	43.1502	54.295	0.0924889	0.782787	0.936265
Alkbh5	1045.11	1203.15	1024.96	1105.85	1093.04	1112.47	997.671	-0.017739	0.879556	0.967543
Alkbh6	82.4728	105.385	112.258	94.5418	85.2536	79.5582	80.5941	-0.230877	0.355512	0.683876
Alkbh7	27.0403	59.7182	61.0096	30.559	43.0755	29.6658	52.5983	-0.272374	0.474039	0.775986
Alkbh8	258.234	214.283	200.111	186.219	197.429	187.434	146.766	-0.312402	0.101145	0.359114
Alms1	708.455	569.079	637.753	483.214	499.855	562.301	412.303	-0.380509	0.0106059	0.0835968
Alms1-ps2	4.05604	0	0	1.90994	1.79481	1.34844	1.69672	1.92693	0.31954	NA
Alox12	58.1366	36.0066	36.6057	45.8385	59.2288	36.408	39.8729	0.111064	0.761008	0.926717
Alox12e	127.089	28.1027	60.1961	144.2	35.8963	67.4222	83.1392	0.414267	0.336535	0.664767
Alox15	8.11208	14.9295	10.575	47.7484	42.1781	24.272	41.5696	1.83663	0.000185207	0.00367089
Alox5	37.8564	46.5451	43.1134	54.4332	48.46	59.3315	54.295	0.345141	0.289076	0.621115
Alox5ap	24.3362	62.3528	69.1442	95.4968	130.124	121.36	97.5613	1.1809	0.000451534	0.00753652
Alox8	0	8.78209	6.50769	9.54968	10.7689	8.09066	5.09016	1.39372	0.183645	NA
Aloxe3	8.11208	5.26925	6.50769	3.81987	1.79481	1.34844	0	-1.91417	0.13648	NA
Alpk1	216.322	148.417	176.521	162.345	247.684	261.598	207	0.293359	0.174677	0.489553
Alpk2	58.1366	31.6155	27.6577	4.77484	140.893	2.69689	50.0532	0.360607	0.804436	0.942181
Alpk3	191.986	119.436	176.521	9.54968	609.339	31.0142	225.664	0.403221	0.780212	0.935113
Alpl	216.322	290.687	270.883	304.635	191.148	229.235	212.938	-0.14483	0.50029	0.791763
Als2	469.149	427.688	331.892	405.861	382.295	457.123	391.094	0.0141738	0.926782	0.979862
Als2cl	1319.56	600.695	695.509	633.144	624.595	635.117	624.393	-0.363774	0.011397	0.0878349
Als2cr12	17.5762	48.3015	13.0154	41.0636	43.9729	56.6347	100.955	1.40778	0.00297868	0.0335833
Alx3	0	3.51283	0	0.954968	0	2.69689	4.2418	1.87801	0.388221	NA
Alx4	77.0647	331.085	209.873	309.41	358.963	461.168	426.725	1.10586	1.80439e-06	7.42939e-05
Alyref	332.595	428.566	482.382	523.322	329.348	388.352	386.852	-0.0233894	0.898768	0.973698
Alyref2	29.7443	17.5642	29.2846	37.2437	21.5378	18.8782	32.2377	0.133332	0.767768	0.929626
Amacr	54.0805	90.4555	103.31	96.4517	97.8173	94.3911	127.254	0.362271	0.153111	0.453882
Ambra1	963.985	730.67	667.852	612.134	689.208	706.585	559.917	-0.276459	0.0237857	0.146583
Amdhd2	136.553	171.251	198.484	133.695	105.894	153.723	135.738	-0.347945	0.13333	0.418575
Amelx	8.11208	9.66029	12.2019	8.59471	8.97407	26.9689	19.5123	0.660056	0.352963	0.681471
Amer1	792.28	607.72	667.852	671.342	559.982	664.783	587.065	-0.138157	0.323633	0.652814
Amer2	13.5201	18.4424	9.76153	21.0093	25.1274	36.408	22.9057	0.938962	0.0587225	0.25796
Amfr	1166.79	1290.97	1245.41	1488.79	1485.21	1248.66	1503.29	0.212102	0.0833215	0.320079
Amh	2.70403	5.26925	1.62692	4.77484	5.38444	9.43911	3.39344	0.928269	0.364185	NA
Amhr2	2.70403	7.02567	2.44038	5.72981	10.7689	1.34844	16.9672	1.21756	0.242845	NA
Amica1	10.8161	21.9552	20.3365	20.0543	29.6144	17.5298	26.2991	0.449142	0.378593	0.702367
Amigo1	383.972	263.463	274.136	199.588	226.146	240.023	217.18	-0.449577	0.00673823	0.0601037
Amigo2	178.466	147.539	200.925	142.29	105.894	113.269	147.615	-0.457934	0.029677	0.168846
Amigo3	90.5849	58.84	91.1076	58.253	90.6381	107.876	58.5368	-0.0307916	0.92527	0.979624
Ammecr1	191.986	194.962	230.209	185.264	208.198	214.403	179.004	-0.0670239	0.73321	0.915132
Ammecr1l	870.696	848.35	781.736	780.209	750.232	674.222	723.651	-0.184019	0.162769	0.470194
Amn	2.70403	10.5385	7.32115	7.63974	1.79481	0	3.39344	-1.13005	0.334413	NA
Amn1	59.4886	79.0388	83.7865	63.9828	61.9211	76.8613	63.627	-0.155575	0.59089	0.846719
Amot	446.164	463.694	385.581	380.077	661.389	412.624	499.684	0.178746	0.400916	0.721985
Amotl1	3985.73	3909.78	3441.75	3715.78	4207.94	4110.06	4231.62	0.108938	0.309132	0.639264
Amotl2	1353.37	1276.04	774.415	991.257	1167.53	1537.23	1298.84	0.175862	0.279517	0.612902
Ampd1	101.401	250.289	238.344	1.90994	298.836	8.09066	340.192	-0.261621	0.876754	0.966998
Ampd2	517.821	439.104	519.802	537.647	445.114	496.227	431.815	-0.0377235	0.802854	0.941553
Ampd3	271.755	241.507	193.604	219.643	277.299	204.963	243.479	0.0256279	0.89753	0.973403
Amph	13.5201	8.78209	8.94807	21.0093	22.4352	32.3627	16.1188	1.14534	0.0364339	0.192025
Amt	231.194	193.206	252.986	199.588	157.046	238.675	146.766	-0.282239	0.233909	0.565151
Amy1	788.224	938.805	646.702	1009.4	1019.45	923.684	1795.13	0.574562	0.0186108	0.123013
Amz1	87.8808	36.8848	67.5173	55.3881	42.1781	74.1644	57.6884	-0.064143	0.845463	0.957932
Amz2	406.956	475.111	449.844	499.448	564.469	490.834	514.106	0.220312	0.119932	0.394437
Anapc1	2113.2	2387.85	2091.41	2209.8	2182.49	2351.69	2123.44	0.0123911	0.905415	0.974941
Anapc10	123.033	82.5516	117.138	103.137	99.6121	93.0426	150.16	0.076745	0.773142	0.932441
Anapc11	112.217	163.347	200.925	201.498	169.61	175.298	218.877	0.289327	0.126467	0.406511
Anapc13	98.697	167.738	172.454	150.885	142.688	120.012	183.246	0.0526038	0.799707	0.940252
Anapc15	246.066	100.116	124.46	122.236	108.586	122.708	153.553	-0.174966	0.499668	0.791237
Anapc16	186.578	223.943	215.567	228.237	231.531	230.584	253.659	0.177494	0.301177	0.632475
Anapc2	828.784	646.362	586.505	618.819	621.903	578.483	509.016	-0.218702	0.124004	0.401714
Anapc4	671.95	717.496	689.815	714.316	741.258	748.386	752.495	0.0916858	0.447989	0.755608
Anapc5	2413.34	2095.41	2290.71	2227.94	2145.7	2175.04	2517.08	0.00408646	0.971907	0.993118
Anapc7	362.339	357.431	297.727	375.302	340.117	312.839	304.561	-0.0174022	0.919083	0.97827
Ang	51.3765	40.3976	51.248	44.8835	69.1003	80.9066	73.8073	0.497021	0.148909	0.446757
Angel1	129.793	88.6991	100.869	90.7219	99.6121	99.7849	85.6843	-0.157055	0.503135	0.794117
Angel2	523.229	451.399	458.792	451.7	464.857	484.091	533.618	0.0244131	0.869139	0.964824
Angpt1	515.117	180.033	315.623	276.941	251.274	241.371	346.979	-0.122515	0.560047	0.829689
Angpt2	178.466	346.892	260.308	449.79	540.239	600.058	634.573	1.11974	2.62378e-10	2.91846e-08
Angpt4	4.05604	0.878209	4.06731	1.90994	1.79481	2.69689	2.54508	-0.120142	0.92713	NA
Angptl1	24.3362	26.3463	28.4711	25.7841	30.5118	44.4987	31.3893	0.301914	0.483227	0.781812
Angptl2	767.943	1795.06	1914.89	2021.67	2159.16	2319.32	2352.5	0.662295	0.000122119	0.00262652
Angptl3	27.0403	24.5898	40.6731	25.7841	34.9989	44.4987	27.1475	0.105817	0.81256	0.945429
Angptl4	1726.52	1931.18	204.992	1316.9	1574.05	1649.15	767.765	0.570018	0.213429	0.539363
Angptl6	6.76007	6.14746	7.32115	7.63974	8.07666	6.74222	12.7254	0.388762	0.615241	NA
Angptl7	33.8003	35.1283	28.4711	14.3245	21.5378	51.2409	16.1188	-0.451894	0.385825	0.7088
Ank	286.627	587.522	401.85	546.242	747.54	517.803	673.597	0.591936	0.000703802	0.0107592
Ank1	77.0647	74.6477	76.4653	28.649	121.15	51.2409	115.377	0.055804	0.90838	0.97518
Ank2	239.306	291.565	267.629	464.114	498.061	540.726	485.262	0.89775	2.43015e-09	2.16785e-07
Ank3	1146.51	1099.52	868.776	908.174	1013.17	841.429	643.905	-0.27823	0.0944152	0.344628
Ankdd1b	25.6882	29.8591	21.9634	33.4239	22.4352	35.0595	44.9631	0.39739	0.376074	0.699797
Ankef1	137.905	122.071	47.1807	132.741	144.482	155.071	111.983	0.542455	0.0333645	0.182094
Ankfn1	10.8161	6.14746	8.13461	1.90994	3.58963	2.69689	5.09016	-1.26348	0.185279	NA
Ankfy1	1375	1507.01	1454.47	1550.87	1497.77	1380.81	1362.47	0.00202391	0.986319	0.997982
Ankhd1	2896.01	1932.06	2159.74	1715.12	1827.12	1980.86	1594.07	-0.363019	0.000536044	0.00866566
Ankib1	878.808	859.766	823.223	835.597	840.87	849.52	883.142	-0.00130691	0.991197	0.997982
Ankle1	75.7127	72.8913	126.9	109.821	105.894	78.2098	77.2007	0.0579463	0.841343	0.957056
Ankle2	680.063	823.76	843.559	849.921	829.204	707.933	837.331	0.0444428	0.724252	0.911892
Ankmy1	2.70403	3.51283	1.62692	3.81987	5.38444	2.69689	1.69672	0.433461	0.720935	NA
Ankmy2	328.539	377.63	309.929	380.077	296.144	329.02	339.344	-0.00913082	0.957656	0.988925
Ankra2	175.762	122.071	148.863	173.804	179.481	191.479	186.639	0.319166	0.0964905	0.34946
Ankrd1	4.05604	23.7116	1.62692	10.5046	14.3585	10.7876	2.54508	0.706096	0.412433	0.7287
Ankrd10	671.95	511.117	561.288	533.827	562.674	585.225	486.11	-0.0899229	0.495114	0.788104
Ankrd11	2951.44	2516.07	2258.17	2110.48	2242.62	2442.03	2007.22	-0.217989	0.0317304	0.176208
Ankrd12	1157.32	757.016	992.422	612.134	813.05	814.46	714.319	-0.366638	0.0146021	0.103838
Ankrd13a	709.807	939.683	876.911	955.923	875.869	919.639	939.982	0.135241	0.250611	0.583697
Ankrd13b	332.595	297.713	230.209	255.931	262.043	296.658	189.184	-0.185298	0.312186	0.641232
Ankrd13c	313.667	371.482	393.715	443.105	409.217	338.459	457.266	0.195821	0.200939	0.524609
Ankrd13d	156.834	68.5003	129.34	60.163	63.7159	86.3004	64.4753	-0.697141	0.0101825	0.0811535
Ankrd16	390.732	209.014	231.836	204.363	223.454	311.491	249.418	-0.102996	0.601347	0.852825
Ankrd17	3156.95	2864.72	2723.47	2518.25	2505.56	2562.04	2270.21	-0.238345	0.0207577	0.133402
Ankrd2	31.0963	3.51283	13.8288	0	120.252	4.04533	5.93852	1.08513	0.5911	0.846741
Ankrd22	58.1366	8.78209	83.7865	7.63974	4.48703	4.04533	3.39344	-2.85991	1.07156e-06	4.79626e-05
Ankrd23	523.229	224.821	166.76	60.163	778.949	124.057	207	-0.0178327	0.985109	0.997982
Ankrd24	269.051	141.392	182.215	148.975	142.688	159.116	183.246	-0.250867	0.242082	0.575407
Ankrd26	355.579	265.219	264.375	211.048	240.505	256.204	286.746	-0.224524	0.243194	0.576553
Ankrd27	751.719	712.227	582.438	658.928	628.185	649.95	635.421	-0.0739693	0.582273	0.842109
Ankrd28	711.159	625.285	690.628	599.72	671.26	542.075	505.622	-0.216598	0.162563	0.470194
Ankrd29	25.6882	41.2758	18.7096	54.4332	44.8703	80.9066	68.7171	1.18731	0.00223713	0.0272691
Ankrd32	285.275	254.68	279.017	258.796	269.222	249.462	201.061	-0.157494	0.39385	0.715808
Ankrd33b	262.291	228.334	150.49	169.984	197.429	111.921	155.25	-0.381406	0.15231	0.452626
Ankrd34a	8.11208	7.02567	10.575	15.2795	14.3585	8.09066	2.54508	0.24147	0.774623	0.933065
Ankrd34b	8.11208	0	4.06731	0	0	2.69689	5.93852	0.372222	0.843302	NA
Ankrd35	27.0403	30.7373	29.2846	58.253	35.8963	74.1644	67.8688	1.01802	0.0107078	0.0839998
Ankrd37	18.9282	9.66029	10.575	12.4146	9.87147	10.7876	22.9057	0.16601	0.800542	0.940496
Ankrd39	78.4168	61.4746	89.4807	42.0186	82.5614	66.0738	72.9589	-0.197247	0.565199	0.832637
Ankrd40	693.583	939.683	654.836	802.173	883.048	792.885	1274.24	0.301677	0.129192	0.41168
Ankrd42	183.874	115.924	135.848	102.182	97.8173	93.0426	75.504	-0.621793	0.00787132	0.0673491
Ankrd44	523.229	506.726	402.663	517.593	498.958	627.026	606.577	0.246567	0.128409	0.410627
Ankrd45	0	0	0	1.90994	3.58963	5.39378	0	3.61971	0.134595	NA
Ankrd46	386.676	465.451	381.513	482.259	496.266	454.426	462.356	0.208288	0.137222	0.4258
Ankrd49	196.042	190.571	213.127	228.237	157.046	161.813	205.303	-0.0949661	0.639641	0.873377
Ankrd50	333.947	392.559	289.592	395.357	393.961	415.321	379.217	0.233463	0.112159	0.378907
Ankrd52	962.633	917.728	815.901	642.693	796.897	873.792	542.95	-0.346964	0.028491	0.164175
Ankrd53	10.8161	9.66029	7.32115	9.54968	14.3585	10.7876	9.33195	0.264346	0.694417	0.8985
Ankrd54	166.298	158.956	160.252	194.813	117.56	149.677	140.828	-0.107338	0.65718	0.881741
Ankrd55	8.11208	1.75642	6.50769	3.81987	5.38444	2.69689	5.09016	-0.0479756	0.961798	NA
Ankrd6	100.049	144.026	82.973	114.596	115.765	128.102	100.955	0.103041	0.653452	0.879797
Ankrd61	47.3205	15.8078	13.8288	22.9192	25.1274	14.8329	13.5738	-0.163827	0.753897	0.924081
Ankrd63	0	10.5385	1.62692	11.4596	1.79481	5.39378	10.1803	2.00238	0.0828737	NA
Ankrd9	40.5604	57.0836	88.6673	52.5232	46.6651	35.0595	57.6884	-0.324657	0.303907	0.635312
Anks1	861.232	752.625	828.917	647.468	688.311	795.582	703.29	-0.19829	0.141678	0.433971
Anks1b	13.5201	7.02567	6.50769	4.77484	4.48703	2.69689	6.78688	-0.838969	0.338257	NA
Anks3	394.788	294.2	334.332	279.806	284.478	331.717	322.377	-0.147714	0.368758	0.693545
Anks6	45.9684	90.4555	48.8077	63.0279	47.5625	97.088	52.5983	0.114165	0.747824	0.921867
Ankzf1	411.012	201.988	283.898	219.643	268.325	198.221	204.455	-0.347264	0.0682115	0.283596
Anln	210.914	425.931	403.477	443.105	430.755	505.667	238.389	0.265504	0.354632	0.682894
Ano1	4618.48	3671.79	4007.11	3880.99	2593.5	2738.69	2562.05	-0.472551	0.00558064	0.0521175
Ano10	573.254	562.054	492.144	518.548	526.778	544.771	604.88	0.0213132	0.883837	0.969074
Ano2	6.76007	0	0	1.90994	5.38444	6.74222	5.93852	3.10822	0.0392815	NA
Ano3	8.11208	3.51283	16.2692	16.2345	19.7429	20.2267	16.1188	1.18272	0.0680016	0.283119
Ano4	79.7688	51.8143	49.6211	40.1086	32.3066	41.8018	37.3278	-0.630534	0.0636412	0.271744
Ano5	101.401	125.584	123.646	0	195.635	10.7876	167.975	-0.345614	0.8596	0.962321
Ano6	2316	2040.96	1666.78	1883.2	1928.53	1933.67	1582.19	-0.118486	0.312019	0.641232
Ano8	359.635	283.661	241.598	300.815	254.863	326.323	302.864	0.0306294	0.868311	0.964824
Ano9	289.331	115.924	292.846	210.093	191.148	225.19	184.942	-0.0686238	0.726969	0.912999
Anp32a	813.912	807.952	693.882	909.129	724.207	752.432	816.97	0.0553891	0.715165	0.908059
Anp32b	433.996	294.2	347.348	302.725	319.477	333.066	207.848	-0.288793	0.132952	0.417751
Anp32e	417.772	544.489	484.823	584.44	522.291	512.409	411.454	0.0768648	0.66197	0.884529
Anpep	2203.78	574.348	2049.92	902.445	838.178	796.93	567.552	-0.805071	1.74279e-05	0.000526902
Antxr1	847.712	1724.8	1138.03	1718.94	1904.3	1906.7	1621.21	0.576714	6.77066e-06	0.000240851
Antxr2	301.499	639.336	513.294	712.406	812.153	737.599	994.277	0.794131	1.68811e-07	9.05084e-06
Antxrl	43.2644	2.63463	10.575	1.90994	0.897407	1.34844	1.69672	-2.78517	0.00439993	0.0439846
Anxa1	723.327	1580.78	1374.75	1747.59	1426.88	1434.74	1855.36	0.44898	3.57449e-05	0.000963432
Anxa11	174.41	191.449	210.686	161.39	187.558	184.737	174.762	-0.11981	0.5397	0.816104
Anxa13	0	4.39104	3.25384	0	1.79481	4.04533	3.39344	0.375376	0.82315	NA
Anxa2	1064.03	2732.11	2083.27	3072.13	2459.79	2707.68	4177.32	0.726239	2.57068e-07	1.32124e-05
Anxa3	419.124	656.022	389.648	723.866	573.443	614.89	642.208	0.419321	0.0127336	0.0949923
Anxa4	950.465	1370.88	1060.75	1255.78	920.739	942.562	1107.11	-0.0896835	0.555179	0.825925
Anxa5	1251.96	2503.77	1784.73	3046.35	2574.66	2737.34	3175.41	0.682236	9.77569e-10	9.46147e-08
Anxa6	1741.39	3521.62	2225.63	3574.44	2811.57	3160.75	3586.86	0.440802	0.000726723	0.0110868
Anxa7	682.767	950.222	899.688	988.392	1053.56	953.35	1284.42	0.34544	0.0121439	0.092255
Anxa8	140.609	48.3015	69.9576	42.9736	17.0507	20.2267	51.7499	-1.3	0.00510502	0.0490272
Anxa9	47.3205	96.6029	54.5019	85.9471	99.6121	82.2551	62.7786	0.373884	0.208063	0.532849
Aoah	67.6007	55.3271	124.46	64.9378	56.5366	79.5582	106.893	-0.0243638	0.93925	0.98347
Aoc2	71.6567	40.3976	76.4653	33.4239	64.6133	51.2409	44.9631	-0.319524	0.389049	0.711507
Aoc3	2236.23	3089.54	2068.63	2796.15	3131.95	4274.57	4022.92	0.54135	0.00117906	0.0162571
Aox1	770.647	560.297	369.311	551.971	717.028	680.964	568.401	0.214937	0.126213	0.405892
Aox2	8.11208	8.78209	0	0	0	2.69689	2.54508	-0.922721	0.61007	NA
Aox3	62.1926	39.5194	78.0923	26.7391	61.9211	45.8471	83.9876	-0.065339	0.88212	0.968616
Ap1ar	377.212	345.136	283.898	294.13	289.862	385.655	292.684	-0.0828289	0.623284	0.86411
Ap1b1	673.302	692.907	817.528	754.425	774.462	674.222	744.86	0.0220961	0.863977	0.964597
Ap1g1	1489.92	1464.85	1530.12	1469.7	1506.75	1380.81	1314.96	-0.0756354	0.519505	0.803655
Ap1g2	402.9	185.302	260.308	188.129	217.172	221.145	180.701	-0.403364	0.0175346	0.117939
Ap1m1	244.714	254.68	268.442	243.517	262.043	260.25	269.778	0.0157685	0.924104	0.979303
Ap1m2	462.388	376.751	593.827	448.835	289.862	284.522	217.18	-0.601936	0.0126919	0.0948301
Ap1s1	164.946	260.828	250.546	220.598	227.941	235.978	211.242	0.00449531	0.981004	0.996789
Ap1s2	152.777	194.084	203.365	200.543	222.557	194.176	264.688	0.269701	0.166401	0.47614
Ap1s3	68.9527	35.1283	52.875	34.3788	37.6911	36.408	25.4508	-0.587128	0.102462	0.361381
Ap2a1	450.22	692.907	633.686	621.684	538.444	664.783	575.188	0.0318423	0.837579	0.95532
Ap2a2	1066.74	1500.86	1245.41	1489.75	1487.9	1645.1	1929.17	0.370642	0.00647717	0.0582984
Ap2b1	1585.91	1846.87	1695.25	1779.11	1777.76	1622.18	1500.75	-0.0334754	0.788282	0.937204
Ap2m1	446.164	573.47	596.267	667.522	628.185	525.893	602.335	0.174958	0.217245	0.542748
Ap2s1	186.578	350.405	304.234	354.293	320.374	312.839	393.639	0.331151	0.0297259	0.169044
Ap3b1	1070.79	853.619	951.749	826.047	811.256	833.338	861.085	-0.191796	0.104175	0.36415
Ap3b2	1.35201	0	0	0	5.38444	2.69689	10.1803	3.90342	0.0514879	NA
Ap3d1	2005.04	1502.61	1808.32	1448.69	1512.13	1708.48	1645.82	-0.151123	0.215535	0.540893
Ap3m1	331.243	417.149	481.569	503.268	457.677	416.669	464.901	0.17665	0.219795	0.546221
Ap3m2	158.186	132.61	148.863	162.345	137.303	172.601	167.975	0.132351	0.524368	0.80684
Ap3s1	186.578	313.52	204.179	331.374	372.424	289.915	491.2	0.681885	0.0013739	0.0185321
Ap3s2	421.828	386.412	338.4	373.392	340.117	342.505	301.168	-0.163558	0.311938	0.641232
Ap4b1	279.867	226.578	218.008	240.652	300.631	279.128	243.479	0.148726	0.375296	0.699003
Ap4e1	520.525	328.45	369.311	300.815	430.755	430.154	350.372	-0.0763281	0.645819	0.876199
Ap4m1	343.411	259.95	207.433	283.625	255.761	298.006	289.291	0.0976012	0.601569	0.852825
Ap4s1	125.737	126.462	143.169	108.866	137.303	107.876	136.586	-0.0989019	0.670708	0.888532
Ap5b1	120.329	106.263	142.356	118.416	100.51	114.618	78.0491	-0.253332	0.334691	0.663198
Ap5m1	308.259	246.777	261.121	293.175	303.323	250.811	298.623	0.0888824	0.606358	0.855115
Ap5s1	47.3205	85.1862	67.5173	85.9471	99.6121	67.4222	94.1679	0.411758	0.142781	0.435662
Ap5z1	302.851	221.309	257.054	153.75	197.429	233.281	199.364	-0.399697	0.0474855	0.227287
Apaf1	450.22	496.188	354.669	497.538	480.112	556.907	434.36	0.191834	0.19507	0.517667
Apba1	90.5849	115.924	91.1076	99.3167	125.637	148.329	162.037	0.434269	0.0967316	0.350118
Apba2	2.70403	3.51283	0	5.72981	5.38444	0	9.33195	1.78407	0.246057	NA
Apba3	196.042	261.706	267.629	186.219	226.146	211.706	292.684	-0.0727362	0.728382	0.913563
Apbb1	66.2486	108.02	87.0403	87.857	100.51	160.465	115.377	0.412052	0.159751	0.465784
Apbb1ip	154.129	194.084	171.64	149.93	258.453	223.842	207	0.264712	0.25259	0.585604
Apbb2	1061.33	959.004	699.576	775.434	985.352	1014.03	890.777	0.0344677	0.782898	0.936299
Apbb3	346.115	163.347	167.573	162.345	180.379	246.765	163.733	-0.170562	0.373816	0.697725
Apc	2295.72	2174.44	2180.08	2199.29	2106.21	2257.3	2064.91	-0.0382973	0.712593	0.907392
Apc2	51.3765	66.7439	67.5173	68.7577	75.3821	94.3911	99.2581	0.44794	0.128761	0.411137
Apcdd1	321.779	439.104	193.604	360.978	428.063	593.315	756.737	0.817991	0.0034502	0.0373005
Apeh	342.059	395.194	314.809	337.104	361.655	284.522	317.286	-0.102167	0.544617	0.819499
Apex1	78.4168	134.366	150.49	162.345	102.304	68.7706	115.377	-0.0968186	0.724115	0.911796
Apex2	197.394	131.731	124.46	145.155	128.329	167.207	124.709	-0.0629102	0.770039	0.930898
Aph1a	175.762	184.424	194.417	231.102	199.224	202.267	176.459	0.128104	0.516303	0.80142
Aph1b	120.329	161.59	138.288	222.507	190.25	198.221	213.787	0.562022	0.00325856	0.03586
Aph1c	43.2644	38.6412	52.875	47.7484	55.6392	52.5893	70.4138	0.346295	0.300553	0.632067
Api5	807.152	950.222	1008.69	1146.92	937.79	953.35	985.794	0.126226	0.32033	0.649906
Apip	121.681	143.148	218.008	168.074	177.686	141.587	255.356	0.231455	0.308588	0.639264
Apitd1	1.35201	19.3206	22.7769	50.6133	14.3585	24.272	11.877	1.35975	0.0702205	0.289282
Aplf	179.818	109.776	122.019	99.3167	98.7147	130.799	79.7458	-0.400009	0.0914618	0.338333
Apln	331.243	93.9683	416.492	240.652	111.278	146.98	112.832	-0.629997	0.0174446	0.117599
Aplnr	586.774	695.541	592.2	1362.74	881.253	943.911	1143.59	0.782359	1.12817e-05	0.000370383
Aplp1	56.7845	56.2054	39.0461	46.7934	41.2807	29.6658	16.9672	-0.568057	0.2042	0.528493
Aplp2	5078.16	6381.94	4713.19	6085.05	5746.99	6568.27	7343.4	0.261933	0.0487932	0.231215
Apmap	639.502	865.035	671.105	804.083	857.023	806.37	860.237	0.205629	0.0869268	0.328011
Apoa1bp	247.418	294.2	336.773	308.455	279.093	234.629	364.795	0.0178224	0.917467	0.978109
Apoa2	5.40805	0	0.813461	4.77484	1.79481	9.43911	2.54508	2.36515	0.0957362	NA
Apob	29.7443	12.2949	14.6423	10.5046	15.2559	17.5298	5.09016	-0.599422	0.323095	0.652095
Apobec1	255.53	323.181	388.021	478.439	446.908	420.715	521.741	0.545315	0.000136713	0.00289037
Apobec2	133.849	242.386	316.436	21.0093	544.726	32.3627	573.491	0.370466	0.785559	0.936585
Apobec3	2317.35	810.587	1404.85	986.482	1116.37	933.123	816.122	-0.502124	0.000231536	0.00436289
Apobec4	0	3.51283	0	0.954968	0.897407	2.69689	3.39344	1.88833	0.323857	NA
Apobr	185.226	40.3976	183.842	105.046	92.4329	86.3004	123.86	-0.10586	0.663751	0.885525
Apoc1	162.242	348.649	272.509	270.256	238.71	191.479	338.495	0.02995	0.872922	0.965129
Apoc3	8.11208	5.26925	3.25384	3.81987	7.17925	2.69689	5.09016	-0.114102	0.906357	NA
Apod	360.987	230.969	549.086	252.112	286.273	240.023	458.114	-0.217547	0.354665	0.682894
Apoe	3380.03	7659.74	11105.4	6390.64	5592.64	6597.94	10106.5	0.0834212	0.641929	0.874337
Apof	43.2644	42.154	40.6731	148.975	39.4859	53.9378	27.1475	0.631517	0.259709	0.593815
Apol10b	79.7688	53.5707	73.2115	67.8027	113.073	87.6489	70.4138	0.311718	0.308225	0.639091
Apol11b	0	3.51283	0	11.4596	14.3585	5.39378	11.877	4.26685	0.000869017	NA
Apol6	1195.18	613.868	636.127	630.279	679.337	1065.27	868.72	0.0728218	0.71445	0.907677
Apol7a	31.0963	1.75642	27.6577	24.8292	3.58963	18.8782	14.4221	0.407215	0.572946	0.836821
Apol7c	14.8721	0	8.94807	3.81987	14.3585	10.7876	10.1803	1.69792	0.116381	0.386943
Apol7d	0	0.878209	4.06731	1.90994	3.58963	0	1.69672	0.827315	0.656497	NA
Apol7e	10.8161	5.26925	4.06731	4.77484	6.28185	10.7876	8.48359	0.298543	0.716112	NA
Apol9a	10.8161	8.78209	13.0154	9.54968	5.38444	17.5298	16.1188	0.165354	0.816843	0.947548
Apol9b	2.70403	7.02567	6.50769	7.63974	14.3585	8.09066	20.3606	1.30799	0.0994695	0.355794
Apold1	56.7845	117.68	58.5692	84.0372	59.2288	62.0284	59.3852	-0.154987	0.620556	0.862783
Apom	5.40805	1.75642	7.32115	2.8649	6.28185	9.43911	4.2418	0.383307	0.702397	NA
Apoo	17.5762	30.7373	18.7096	27.6941	25.1274	13.4844	23.7541	0.0533548	0.915286	0.977499
Apool	108.161	173.007	147.236	170.939	162.431	138.89	158.643	0.160461	0.43204	0.743941
Apopt1	102.753	173.007	185.469	190.039	182.174	159.116	231.602	0.337344	0.0830541	0.319299
App	4592.79	6509.28	6326.29	6573.04	5177.14	6333.64	5385.39	0.0261699	0.853184	0.960148
Appbp2	351.523	445.252	409.984	434.51	400.243	369.474	424.18	0.0190161	0.894694	0.972394
Appbp2os	12.1681	10.5385	8.94807	8.59471	16.1533	9.43911	7.63524	-0.0140038	0.983709	0.997808
Appl1	812.56	794.779	759.773	819.362	924.329	775.355	810.183	0.0791278	0.545648	0.820095
Appl2	2188.91	727.157	1108.75	791.668	888.432	891.322	870.417	-0.465445	0.000597524	0.00944443
Aprt	151.425	227.456	220.448	220.598	195.635	217.099	215.483	0.0972819	0.593869	0.848262
Aptx	275.811	256.437	223.702	188.129	236.018	248.114	206.151	-0.198802	0.251501	0.584382
Aqp1	1791.42	2051.5	1283.64	2369.28	2231.85	2962.53	2867.46	0.63459	7.56836e-05	0.00178209
Aqp11	17.5762	20.1988	17.8961	12.4146	21.5378	2.69689	25.4508	-0.278291	0.697836	0.900488
Aqp2	2.70403	0	1.62692	1.90994	0	2.69689	3.39344	1.16697	0.529404	NA
Aqp3	0	0	21.15	9.54968	0	5.39378	6.78688	1.89888	0.205036	NA
Aqp4	40.5604	57.9618	45.5538	3.81987	96.0225	2.69689	70.4138	-0.171284	0.904368	0.974941
Aqp5	327.187	317.033	227.769	250.202	276.401	176.646	137.434	-0.448612	0.0908513	0.337606
Aqp7	566.493	461.938	169.2	402.996	494.471	446.335	414.848	0.316257	0.151308	0.451857
Aqp9	13.5201	26.3463	11.3885	21.0093	34.1014	33.7111	17.8155	0.681783	0.160024	0.466033
Aqr	808.504	885.234	847.626	840.372	706.259	779.401	720.257	-0.15502	0.247197	0.580506
Ar	704.399	682.368	571.05	688.532	813.948	802.324	906.048	0.306164	0.044804	0.219476
Araf	981.561	659.535	745.13	675.162	757.411	685.01	750.798	-0.118918	0.380876	0.704773
Arap1	1489.92	1350.68	1393.46	1387.57	1422.39	1591.16	1275.08	0.00749641	0.950324	0.986313
Arap2	855.824	685.003	568.609	628.369	670.363	751.083	797.458	0.0438376	0.787197	0.936725
Arap3	908.553	528.682	422.186	487.989	486.394	732.205	583.671	-0.0306369	0.87175	0.964923
Arc	8.11208	139.635	39.0461	59.208	52.947	91.6942	32.2377	0.605143	0.207097	0.531197
Arcn1	1560.22	1915.37	1968.58	2102.84	1796.61	1763.76	2041.15	0.0855252	0.419226	0.734262
Areg	497.541	1457.83	354.669	825.092	624.595	701.191	542.102	0.0740897	0.752057	0.923401
Arel1	803.096	761.407	742.69	721.001	732.284	733.554	735.528	-0.0717504	0.54764	0.821184
Arf1	1237.09	1791.55	1799.38	1823.03	1523.8	1476.55	1800.22	0.048681	0.648198	0.877368
Arf2	212.266	272.245	284.711	312.274	255.761	230.584	392.79	0.20473	0.28397	0.616759
Arf3	1496.68	1124.99	1092.48	1102.03	1185.47	1084.15	988.339	-0.163179	0.173441	0.488038
Arf4	721.975	990.619	976.153	1123.04	1083.17	945.259	1141.04	0.265845	0.0239966	0.14731
Arf5	296.091	478.624	363.617	365.753	402.038	446.335	358.008	0.0624039	0.697668	0.900402
Arf6	1350.66	1613.27	1526.05	1599.57	1316.5	1471.15	1328.53	-0.0666053	0.611086	0.857751
Arfgap1	727.383	630.554	625.552	593.99	708.951	755.129	660.872	0.0421093	0.75266	0.923401
Arfgap2	961.281	818.49	705.271	752.515	798.692	725.463	727.892	-0.124551	0.341059	0.669319
Arfgap3	504.301	334.597	444.15	413.501	357.168	451.729	402.971	-0.0476401	0.757666	0.925521
Arfgef1	2206.49	2103.31	2252.47	1895.61	2265.05	2032.11	1696.72	-0.151573	0.264313	0.598449
Arfgef2	1803.59	963.395	1487.01	1022.77	1106.5	983.016	935.74	-0.426876	0.000507138	0.00829735
Arfgef3	135.201	153.687	123.646	42.0186	89.7407	72.816	43.2663	-1.19486	0.000130458	0.00278579
Arfip1	561.085	652.509	603.588	688.532	718.823	644.556	665.962	0.166043	0.196477	0.519067
Arfip2	558.381	541.855	485.636	471.754	498.061	547.468	546.343	-0.0320374	0.821548	0.949747
Arfrp1	444.812	272.245	318.063	297.95	270.119	272.386	308.803	-0.221524	0.192603	0.515259
Arg1	194.69	21.9552	56.1288	110.776	15.2559	24.272	33.9344	-0.610766	0.294517	0.625947
Arg2	213.618	211.648	155.371	253.066	147.175	151.026	139.131	-0.15482	0.588414	0.845546
Arglu1	1028.88	557.662	670.292	650.333	673.952	778.052	727.044	-0.0276365	0.842277	0.957483
Arhgap1	539.453	586.643	558.034	734.37	656.004	725.463	775.401	0.362979	0.006284	0.0571814
Arhgap10	749.015	372.36	503.532	355.248	419.089	422.063	374.127	-0.392925	0.00562458	0.0523964
Arhgap11a	193.338	235.36	336.773	290.31	263.838	378.913	195.971	0.166046	0.553015	0.824788
Arhgap12	939.649	764.92	782.55	759.199	814.845	751.083	807.638	-0.07008	0.578624	0.839847
Arhgap15	91.9369	62.3528	113.885	100.272	96.0225	95.7395	143.373	0.327448	0.211589	0.537809
Arhgap15os	2.70403	3.51283	1.62692	0	0	5.39378	6.78688	0.262194	0.878443	NA
Arhgap17	580.014	323.181	360.363	296.04	409.217	382.958	344.434	-0.17767	0.269294	0.603502
Arhgap18	744.959	509.361	549.086	774.479	743.053	624.33	736.376	0.288163	0.0599429	0.261472
Arhgap19	263.643	295.956	375.819	249.247	303.323	311.491	264.688	-0.137602	0.486917	0.783352
Arhgap20	97.3449	177.398	104.123	173.804	239.608	227.887	249.418	0.858376	4.21072e-05	0.00109914
Arhgap20os	2.70403	2.63463	8.13461	7.63974	8.07666	6.74222	10.1803	1.02247	0.240558	NA
Arhgap21	1913.1	1592.19	1640.75	1357.96	1422.39	1512.95	1252.18	-0.301681	0.00639853	0.0579054
Arhgap22	39.2084	28.1027	55.3154	44.8835	45.7677	37.7564	34.7827	0.0497766	0.893696	0.972271
Arhgap23	446.164	493.553	342.467	370.528	393.961	594.664	462.356	0.0976769	0.605031	0.8543
Arhgap24	247.418	279.27	202.552	275.031	339.22	281.825	365.643	0.388643	0.0454073	0.22132
Arhgap25	156.834	142.27	170.013	164.254	176.789	165.859	198.516	0.179683	0.366511	0.692183
Arhgap26	1195.18	526.047	500.279	518.548	533.957	524.545	451.327	-0.40716	0.00903039	0.0743225
Arhgap27	431.292	302.982	470.994	277.896	297.042	395.094	264.688	-0.361198	0.0785574	0.309189
Arhgap27os3	75.7127	38.6412	61.823	23.8742	41.2807	52.5893	33.086	-0.608125	0.112649	0.379917
Arhgap28	323.131	339.867	295.286	356.203	326.656	444.987	251.114	0.097567	0.63743	0.871945
Arhgap29	1998.28	1966.31	1299.1	2021.67	2199.54	2416.41	2785.16	0.453299	0.00789245	0.0674137
Arhgap30	216.322	218.674	298.54	275.031	258.453	271.037	346.131	0.244598	0.164673	0.473466
Arhgap31	1076.2	1088.98	813.461	1003.67	1214.19	1303.95	1046.88	0.20722	0.067639	0.282267
Arhgap32	747.663	891.382	651.582	870.931	965.609	937.169	810.183	0.237268	0.0488539	0.231238
Arhgap33	106.809	43.9104	69.1442	32.4689	42.1781	63.3769	36.4795	-0.67288	0.0479028	0.22899
Arhgap35	2115.9	2060.28	2071.07	1797.25	1803.79	1843.32	1619.52	-0.238085	0.0300744	0.170376
Arhgap39	321.779	287.174	265.188	217.733	224.352	316.884	220.573	-0.256428	0.176779	0.492229
Arhgap4	214.97	115.045	139.102	131.786	149.867	221.145	132.344	0.0598797	0.793205	0.938642
Arhgap40	58.1366	22.8334	18.7096	20.0543	27.8196	36.408	13.5738	-0.309965	0.473756	0.7758
Arhgap42	1660.27	814.978	1444.71	784.029	869.587	888.625	620.151	-0.656488	4.04909e-05	0.00106253
Arhgap44	216.322	198.475	148.863	164.254	146.277	153.723	130.647	-0.316731	0.130553	0.414108
Arhgap5	2251.1	2668	2386.69	2485.78	2551.33	2188.52	2688.45	0.0240831	0.836603	0.955157
Arhgap6	312.315	337.232	261.934	310.365	308.708	342.505	318.135	0.080775	0.605544	0.854781
Arhgap8	227.138	104.507	143.983	80.2173	67.3055	67.4222	46.6598	-1.19378	6.98996e-06	0.000246885
Arhgap9	186.578	65.8656	141.542	112.686	102.304	126.754	103.5	-0.0981988	0.664349	0.885541
Arhgdia	1327.68	1596.58	1509.78	1465.88	1365.85	1560.15	1480.39	-0.0099568	0.93166	0.980752
Arhgdib	106.809	134.366	148.863	262.616	166.02	159.116	264.688	0.695314	0.00160808	0.0209149
Arhgdig	21.6322	36.0066	26.0308	15.2795	3.58963	5.39378	5.93852	-1.91232	0.00480177	0.0468392
Arhgef1	1484.51	795.657	764.653	665.613	773.564	993.803	518.348	-0.409669	0.00632484	0.0574128
Arhgef10	661.134	627.919	504.346	586.35	552.802	689.055	591.307	0.0263392	0.855188	0.960918
Arhgef10l	739.551	543.611	674.359	482.259	473.831	508.363	448.782	-0.432316	0.00104444	0.0146861
Arhgef11	872.048	847.471	800.446	808.858	828.306	914.245	817.819	0.00383236	0.974471	0.994225
Arhgef12	4262.9	4221.55	3721.58	3965.98	4206.14	4185.57	3840.52	-0.00445077	0.962567	0.990221
Arhgef15	408.308	259.072	221.261	251.157	256.658	316.884	294.381	-0.022721	0.904517	0.974941
Arhgef16	208.21	174.764	246.479	131.786	99.6121	155.071	85.6843	-0.826785	0.00224252	0.0273001
Arhgef17	1287.12	1401.62	1246.22	1075.29	1102.02	1556.1	1091.84	-0.129681	0.415854	0.73145
Arhgef18	1062.68	721.887	818.342	707.631	678.439	666.131	621.847	-0.349007	0.00535632	0.0505931
Arhgef19	109.513	219.552	196.858	179.534	187.558	137.541	119.619	-0.119843	0.647196	0.876547
Arhgef2	1419.61	1383.18	1039.6	1249.1	1188.17	1507.56	1102.87	-0.0115629	0.931069	0.980752
Arhgef25	799.04	493.553	503.532	575.846	574.34	571.74	593.003	0.000435499	0.997618	0.999521
Arhgef26	250.122	182.667	214.754	142.29	163.328	168.556	123.86	-0.521498	0.00898909	0.0741053
Arhgef28	715.215	465.451	507.6	521.412	499.855	593.315	435.208	-0.106981	0.454509	0.761003
Arhgef3	824.728	877.33	728.861	1060.01	943.174	972.228	799.155	0.223113	0.131676	0.416163
Arhgef33	5.40805	10.5385	0	1.90994	0	2.69689	1.69672	-0.625999	0.695184	NA
Arhgef37	50.0245	38.6412	34.9788	39.1537	28.717	62.0284	64.4753	0.256813	0.546813	0.820687
Arhgef38	132.497	82.5516	78.0923	47.7484	57.434	70.1191	36.4795	-0.865179	0.00271229	0.0315096
Arhgef39	21.6322	29.8591	39.8596	40.1086	41.2807	67.4222	17.8155	0.414522	0.430966	0.742607
Arhgef4	86.5288	82.5516	55.3154	85.9471	85.2536	113.269	83.1392	0.316956	0.228085	0.557438
Arhgef40	1376.35	1261.99	917.584	1178.43	954.841	1487.33	1009.55	-0.0156252	0.928054	0.980268
Arhgef5	1069.44	753.503	904.569	804.083	609.339	713.327	696.503	-0.346189	0.0157514	0.109605
Arhgef6	1041.05	457.547	667.852	582.53	498.061	504.318	574.339	-0.322464	0.0345223	0.186096
Arhgef7	909.905	905.433	784.99	857.561	900.099	995.152	906.048	0.0798046	0.504031	0.794371
Arhgef9	113.569	119.436	74.025	144.2	152.559	114.618	139.131	0.463594	0.0668169	0.280424
Arid1a	2022.61	1772.22	1791.24	1355.1	1508.54	1589.82	1182.61	-0.403794	0.00145045	0.0193545
Arid1b	1420.97	1686.16	1376.38	1477.34	1392.77	1494.08	1230.97	-0.0935283	0.4578	0.76397
Arid2	1963.12	1606.24	1448.77	1528.9	1478.03	1615.44	1199.58	-0.18875	0.142277	0.434955
Arid3a	140.609	94.8465	101.683	96.4517	104.099	114.618	95.0163	-0.106659	0.639198	0.873098
Arid3b	181.17	77.2824	109.004	78.3074	78.9718	120.012	76.3524	-0.383354	0.134989	0.421539
Arid4a	1153.27	575.227	675.986	593.99	650.62	668.828	548.889	-0.303874	0.0124031	0.0934469
Arid4b	1337.14	899.286	921.651	894.805	910.868	927.73	748.253	-0.244464	0.0460297	0.222896
Arid5a	443.46	257.315	335.959	230.147	251.274	241.371	196.819	-0.54547	0.000992388	0.0141006
Arid5b	869.344	654.265	671.919	491.808	721.515	596.012	419.938	-0.393156	0.0263808	0.156073
Arih1	1208.7	1404.26	1324.31	1442	1494.18	1357.88	1387.92	0.114124	0.309596	0.63952
Arih2	544.861	495.31	557.221	557.701	535.752	539.378	475.93	-0.0121449	0.931047	0.980752
Arl1	279.867	517.265	558.848	614.999	496.266	492.182	714.319	0.392352	0.00382179	0.0400589
Arl10	105.457	86.0644	61.0096	63.9828	64.6133	80.9066	74.6556	-0.205821	0.464709	0.769439
Arl11	2.70403	12.2949	23.5904	22.9192	12.5637	8.09066	25.4508	0.723767	0.236005	0.567547
Arl13a	6.76007	1.75642	8.13461	7.63974	4.48703	6.74222	4.2418	0.319567	0.730361	NA
Arl13b	359.635	299.469	342.467	295.085	307.81	361.383	310.5	-0.0635917	0.694126	0.89832
Arl14ep	340.707	336.354	315.623	383.897	350.886	331.717	356.311	0.106781	0.49192	0.786872
Arl15	352.875	273.123	226.142	328.509	289.862	266.992	272.323	0.0590098	0.757587	0.925521
Arl16	58.1366	68.5003	70.7711	80.2173	85.2536	107.876	89.9261	0.455712	0.0994041	0.355658
Arl2	60.8406	90.4555	94.3615	109.821	86.151	107.876	143.373	0.456346	0.0796171	0.312041
Arl2bp	263.643	407.489	331.079	487.989	467.549	427.457	532.77	0.532533	0.000233732	0.00438762
Arl3	68.9527	117.68	123.646	123.191	116.663	94.3911	151.008	0.255856	0.270018	0.604036
Arl4a	688.175	916.85	549.086	847.056	802.281	1049.09	1037.54	0.405603	0.0148589	0.104891
Arl4c	292.035	423.297	466.113	466.979	363.45	528.59	410.606	0.185038	0.355962	0.683977
Arl4d	89.2329	105.385	58.5692	98.3617	82.5614	82.2551	75.504	0.0471193	0.868172	0.964824
Arl5a	819.32	872.061	900.501	1050.46	1025.74	902.109	1021.42	0.210454	0.0815661	0.31545
Arl5b	308.259	294.2	277.39	315.139	282.683	339.808	285.897	0.0605804	0.712851	0.907392
Arl5c	10.8161	17.5642	28.4711	33.4239	26.9222	39.1049	32.2377	0.857052	0.0698812	0.288207
Arl6	36.5044	94.8465	55.3154	101.227	93.3303	102.482	86.5327	0.708899	0.00996745	0.0798306
Arl6ip1	715.215	995.889	998.117	1207.08	1172.01	1098.98	1054.51	0.337293	0.0117577	0.0898247
Arl6ip4	239.306	182.667	187.91	197.678	157.944	190.131	160.34	-0.189199	0.341995	0.670627
Arl6ip5	420.476	360.066	429.507	457.43	522.291	428.805	497.139	0.249087	0.103228	0.362368
Arl6ip6	135.201	139.635	161.879	137.515	137.303	141.587	150.16	-0.0383071	0.851043	0.960078
Arl8a	209.562	189.693	179.775	190.039	231.531	227.887	218.877	0.173116	0.34036	0.668357
Arl8b	765.239	898.407	981.034	1085.8	833.691	821.202	1005.31	0.0834967	0.513851	0.801146
Armc1	356.931	403.098	420.559	405.861	383.193	341.156	410.606	-0.0307527	0.832425	0.95382
Armc10	444.812	424.175	418.932	479.394	341.912	396.443	404.667	-0.0837305	0.624739	0.864679
Armc2	13.5201	15.8078	15.4558	14.3245	23.3326	18.8782	16.1188	0.267875	0.623949	0.864389
Armc5	151.425	208.135	148.05	119.371	154.354	172.601	151.008	-0.176872	0.39684	0.718816
Armc6	62.1926	91.3337	77.2788	80.2173	57.434	67.4222	78.8974	-0.111041	0.692255	0.897613
Armc7	71.6567	64.1092	71.5846	69.7126	60.1262	59.3315	77.2007	-0.0499139	0.86087	0.962836
Armc8	546.213	473.354	562.915	459.34	485.497	547.468	526.831	-0.0585039	0.690916	0.896882
Armc9	146.017	118.558	136.661	136.56	130.124	113.269	111.983	-0.110039	0.618432	0.861614
Armcx1	319.075	190.571	215.567	273.121	251.274	268.34	249.418	0.155154	0.359949	0.685628
Armcx2	202.802	605.964	313.183	562.476	572.545	647.253	558.221	0.76717	5.71712e-07	2.67128e-05
Armcx3	179.818	192.328	175.708	163.299	202.814	196.873	186.639	0.0340973	0.857477	0.962039
Armcx4	2340.33	1628.2	1242.16	1653.05	1255.47	1340.35	926.409	-0.369447	0.0717788	0.293113
Armcx5	83.8248	61.4746	58.5692	99.3167	90.6381	102.482	87.381	0.506741	0.0502065	0.23499
Armcx6	21.6322	55.3271	24.4038	54.4332	42.1781	40.4533	61.9302	0.673189	0.0741225	0.298917
Armt1	139.257	139.635	137.475	137.515	115.765	107.876	123.86	-0.194058	0.377359	0.70141
Arnt	863.936	667.439	719.913	710.496	686.516	733.554	687.171	-0.0777043	0.522391	0.805362
Arnt2	16.2242	51.8143	21.15	38.1987	48.46	40.4533	16.9672	0.408685	0.39401	0.715904
Arntl	141.961	224.821	88.6673	258.796	265.632	300.703	291.836	0.971875	3.46241e-06	0.000131316
Arntl2	369.1	180.033	196.858	146.11	141.79	172.601	170.52	-0.562147	0.00748208	0.0649507
Arpc1a	558.381	623.528	727.234	755.38	720.617	578.483	789.823	0.161562	0.238957	0.571235
Arpc1b	804.448	1059.12	1168.13	1143.1	1058.04	1201.46	1287.81	0.223549	0.0843262	0.322098
Arpc2	650.318	1022.23	919.211	1071.47	933.303	934.472	1192.79	0.268381	0.0256555	0.1536
Arpc3	490.781	742.964	665.411	864.246	766.385	594.664	902.654	0.307402	0.0408826	0.206461
Arpc4	378.564	489.162	525.496	592.08	523.188	504.318	615.061	0.270649	0.0382099	0.197818
Arpc5	946.409	1139.91	1065.63	1291.12	1141.5	1202.81	1301.38	0.231425	0.0439834	0.217221
Arpc5l	270.403	280.149	362.804	318.004	315.887	265.643	371.581	0.0693598	0.673213	0.889301
Arpin	193.338	277.514	257.867	264.526	202.814	240.023	214.635	-0.0692176	0.717163	0.908955
Arpp19	501.597	649.874	601.961	750.605	650.62	581.179	695.655	0.196649	0.151754	0.452287
Arpp21	13.5201	6.14746	1.62692	0	28.717	2.69689	9.33195	0.858135	0.476004	0.777335
Arr3	4.05604	0.878209	2.44038	0	0.897407	6.74222	4.2418	0.489644	0.753134	NA
Arrb1	3301.62	4204.86	3663.02	3966.94	3471.17	3766.2	3329.81	-0.0320704	0.789907	0.937684
Arrb2	316.371	283.661	298.54	270.256	246.787	300.703	274.02	-0.132765	0.424966	0.738672
Arrdc1	548.917	347.771	417.306	313.229	319.477	431.502	325.77	-0.307277	0.0672347	0.281182
Arrdc2	237.954	122.071	156.998	148.02	115.765	155.071	115.377	-0.304748	0.164772	0.47357
Arrdc3	1246.56	825.516	1042.86	948.283	1012.27	885.928	870.417	-0.131047	0.292008	0.623376
Arrdc4	1337.14	1052.09	771.161	951.148	865.997	885.928	763.524	-0.239617	0.122431	0.399118
Arsa	183.874	230.091	230.209	291.265	283.58	253.507	284.2	0.376022	0.023804	0.146583
Arsb	306.907	377.63	352.229	418.276	476.523	474.652	386.852	0.340545	0.034615	0.186341
Arsg	71.6567	69.3785	65.0769	75.4425	63.7159	84.952	62.7786	0.056732	0.843124	0.957514
Arsi	12.1681	52.6925	33.3519	103.137	51.1522	76.8613	77.2007	1.42294	0.000154883	0.00320185
Arsj	16.2242	43.0322	39.0461	45.8385	61.0236	59.3315	51.7499	0.803346	0.0350601	0.187908
Arsk	144.665	209.892	209.873	259.751	201.019	179.343	217.18	0.195744	0.309359	0.639264
Art1	59.4886	43.0322	56.9423	3.81987	104.997	16.1813	67.0204	-0.141224	0.906173	0.975121
Art2a-ps	20.2802	7.02567	12.2019	2.8649	16.1533	10.7876	6.78688	-0.46334	0.543718	0.818979
Art2b	2.70403	0	5.69423	3.81987	4.48703	4.04533	1.69672	1.27269	0.360337	NA
Art3	728.735	540.098	466.927	604.495	653.312	699.842	865.327	0.319547	0.0969366	0.350689
Art4	27.0403	26.3463	30.9115	41.0636	37.6911	48.544	28.8442	0.458145	0.260516	0.595092
Art5	8.11208	5.26925	8.13461	0	23.3326	8.09066	10.1803	0.474372	0.665278	0.885844
Artn	2.70403	3.51283	3.25384	0.954968	2.69222	2.69689	3.39344	-0.379767	0.763382	NA
Arv1	100.049	64.1092	71.5846	49.6583	67.3055	70.1191	50.0532	-0.387222	0.176598	0.491998
Arvcf	248.77	317.033	261.934	259.751	208.198	312.839	223.119	-0.138787	0.501461	0.793089
Arxes1	51.3765	45.6668	22.7769	57.2981	61.9211	48.544	54.295	0.564086	0.118159	0.390587
Arxes2	283.923	296.835	200.111	267.391	331.143	310.142	369.036	0.318223	0.103744	0.363323
As3mt	156.834	132.61	196.044	228.237	181.276	172.601	225.664	0.333639	0.0720845	0.293932
Asah1	602.998	785.997	950.122	1024.68	868.69	810.415	1052.81	0.278797	0.015681	0.109268
Asah2	471.853	387.29	348.161	407.771	472.933	494.879	431.815	0.179528	0.196661	0.519093
Asap1	863.936	678.855	706.084	560.566	628.185	732.205	658.327	-0.206929	0.144006	0.437152
Asap2	592.182	426.809	358.736	397.267	440.627	439.593	397.881	-0.0947968	0.510263	0.798107
Asap3	225.786	304.738	223.702	235.877	219.865	350.595	278.262	0.112039	0.599944	0.852203
Asb1	189.282	222.187	176.521	197.678	302.426	231.932	309.651	0.41452	0.0648921	0.27509
Asb10	13.5201	9.66029	16.2692	5.72981	36.7937	0	11.0287	0.048099	0.963604	0.990308
Asb11	24.3362	19.3206	39.0461	0	61.9211	0	46.6598	0.0447067	0.985496	0.997982
Asb12	0	12.2949	14.6423	0	15.2559	16.1813	20.3606	1.46092	0.245358	0.578741
Asb13	219.026	177.398	187.096	170.939	199.224	171.252	193.426	-0.068706	0.720477	0.910209
Asb14	32.4483	39.5194	34.1654	8.59471	91.5355	16.1813	57.6884	0.277624	0.692695	0.897697
Asb15	54.0805	17.5642	24.4038	1.90994	37.6911	1.34844	11.877	-1.13841	0.219321	0.54576
Asb16	10.8161	8.78209	16.2692	0	20.6404	2.69689	13.5738	-0.320471	0.774265	0.933011
Asb18	1.35201	1.75642	3.25384	0.954968	8.97407	0	6.78688	1.07289	0.475551	NA
Asb2	152.777	150.174	156.185	113.641	262.043	111.921	255.356	0.279375	0.432247	0.743957
Asb3	182.522	177.398	158.625	160.435	205.506	188.782	159.492	0.0441724	0.819989	0.948908
Asb4	10.8161	11.4167	5.69423	7.63974	17.0507	13.4844	13.5738	0.526704	0.428256	0.740656
Asb5	22.9842	33.3719	30.9115	3.81987	87.9458	0	51.7499	0.281929	0.875941	0.966795
Asb6	132.497	133.488	167.573	150.885	113.971	157.768	150.16	-0.0119627	0.957345	0.988858
Asb7	310.963	319.668	284.711	306.545	312.297	234.629	257.053	-0.131685	0.480752	0.780737
Asb8	194.69	181.789	218.821	210.093	239.608	167.207	234.147	0.107923	0.597233	0.850622
Ascc1	183.874	154.565	191.977	140.38	147.175	132.148	130.647	-0.352547	0.0794377	0.311666
Ascc2	469.149	377.63	339.213	360.023	414.602	401.836	349.524	-0.0358949	0.801003	0.940815
Ascc3	1508.85	1139.04	1317.81	1077.2	1098.43	1085.5	1145.29	-0.247226	0.0296556	0.168837
Ascl1	0	1.75642	0	3.81987	10.7689	5.39378	8.48359	4.08032	0.004209	NA
Ascl2	2.70403	1.75642	2.44038	1.90994	0	0	3.39344	-1.32499	0.474537	NA
Asf1a	233.898	253.802	288.779	254.976	230.633	261.598	262.143	-0.0366286	0.827845	0.951792
Asf1b	24.3362	59.7182	103.31	82.1272	48.46	78.2098	42.418	0.201184	0.642587	0.874361
Asgr2	5.40805	14.0513	16.2692	14.3245	17.9481	21.5751	27.9959	0.871251	0.139202	0.429359
Ash1l	4212.87	2880.52	3021.19	2551.67	2918.37	3046.14	2453.46	-0.274228	0.00596425	0.0547059
Ash2l	458.332	490.919	574.303	519.502	511.522	478.698	446.237	-0.0510187	0.734997	0.915734
Asic1	66.2486	52.6925	39.8596	47.7484	43.0755	59.3315	52.5983	-0.0291005	0.930176	0.980639
Asic3	6.76007	14.0513	17.0827	15.2795	17.9481	16.1813	13.5738	0.37396	0.535053	0.81361
Asic4	0	1.75642	5.69423	1.90994	0	2.69689	0	-0.328649	0.878483	NA
Asl	204.154	140.513	218.008	183.354	147.175	151.026	152.705	-0.213477	0.269659	0.603681
Asna1	144.665	210.77	192.79	349.518	241.402	221.145	324.073	0.631782	0.00140189	0.0188585
Asns	217.674	226.578	289.592	277.896	255.761	240.023	296.926	0.136545	0.401892	0.722423
Asnsd1	325.835	360.066	417.306	394.402	415.499	341.156	452.176	0.127925	0.413195	0.729167
Aspa	87.8808	141.392	89.4807	166.164	192.942	130.799	231.602	0.788269	0.00227213	0.0274887
Aspg	124.385	165.103	89.4807	101.227	169.61	10.7876	57.6884	-0.532193	0.590551	0.846641
Asph	1387.17	1687.92	1288.52	1690.29	1697.89	1816.35	1700.11	0.252584	0.0185158	0.122688
Asphd1	6.76007	2.63463	0.813461	0.954968	4.48703	4.04533	2.54508	0.188231	0.87887	NA
Asphd2	0	20.1988	11.3885	12.4146	13.4611	24.272	26.2991	1.64196	0.0367795	0.193135
Aspm	227.138	405.732	517.361	516.638	522.291	563.65	254.508	0.340916	0.474794	0.776588
Aspn	178.466	264.341	206.619	332.329	385.885	308.794	377.52	0.710702	3.20561e-05	0.000881544
Asprv1	25.6882	43.9104	37.4192	51.5683	34.1014	37.7564	16.9672	-0.00372095	0.993897	0.998519
Aspscr1	274.459	247.655	267.629	257.841	217.172	253.507	266.385	-0.0799848	0.644095	0.874976
Asrgl1	646.262	354.796	484.823	423.051	271.914	268.34	316.438	-0.58827	0.0030472	0.034098
Aste1	139.257	104.507	104.936	104.091	96.0225	101.133	90.7745	-0.226653	0.328401	0.656759
Astn1	5.40805	5.26925	15.4558	3.81987	8.97407	13.4844	1.69672	-0.333847	0.73456	NA
Astn2	29.7443	31.6155	53.6884	81.1723	52.947	51.2409	38.1762	0.580018	0.142907	0.435678
Asun	463.74	414.514	355.482	362.888	314.99	333.066	373.278	-0.237345	0.16308	0.470702
Asxl1	1292.52	949.344	1047.74	908.174	981.763	1051.79	781.339	-0.225086	0.0801583	0.312938
Asxl2	1214.11	996.767	1084.34	874.751	911.765	957.395	833.937	-0.289697	0.0124033	0.0934469
Asxl3	50.0245	124.706	36.6057	89.767	148.072	120.012	65.3237	0.732103	0.0123579	0.0933102
Atad1	673.302	754.381	690.628	840.372	712.541	699.842	731.286	0.078323	0.565622	0.832637
Atad2	569.197	596.304	794.751	759.199	611.134	709.282	483.565	-0.0150239	0.940739	0.983677
Atad2b	1288.47	962.517	1119.32	905.309	963.815	984.364	749.95	-0.307828	0.0218401	0.138169
Atad3a	899.089	571.714	747.571	620.729	531.265	567.695	651.54	-0.286982	0.0422547	0.211628
Atad3aos	21.6322	15.8078	21.9634	12.4146	14.3585	9.43911	22.0573	-0.422617	0.458764	0.764777
Atad5	370.452	290.687	331.892	428.781	276.401	366.777	220.573	-0.0277571	0.909539	0.975387
Atat1	243.362	138.757	187.096	148.02	148.072	177.995	122.164	-0.310913	0.129102	0.41168
Atcay	10.8161	0	11.3885	0.954968	13.4611	0	5.09016	0.960048	0.529538	NA
Atcayos	13.5201	0.878209	8.13461	0	17.0507	0	9.33195	0.628447	0.671099	NA
Ate1	827.432	679.733	599.521	674.207	648.825	674.222	610.819	-0.0897572	0.495492	0.788355
Atf1	306.907	268.732	255.427	252.112	291.657	302.051	268.082	0.0115231	0.942514	0.983918
Atf2	728.735	708.714	680.867	718.136	761.001	713.327	694.806	0.0332387	0.786253	0.93662
Atf3	67.6007	122.949	87.0403	62.0729	96.0225	64.7253	75.504	-0.28023	0.327743	0.656187
Atf4	1095.13	947.587	1081.09	927.274	973.686	826.596	1201.28	-0.0824742	0.598739	0.851527
Atf5	277.163	425.053	243.225	340.924	421.781	419.366	455.569	0.411078	0.0142294	0.102022
Atf6	805.8	867.67	911.89	827.002	914.457	869.746	868.72	0.0131366	0.915618	0.977499
Atf6b	312.315	360.944	355.482	352.383	290.76	368.125	328.315	-0.0369074	0.825324	0.951216
Atf7	1915.8	1234.76	1405.66	1137.37	1428.67	1375.41	1012.94	-0.27119	0.0381047	0.197506
Atf7ip	1726.52	1189.09	1090.85	982.662	1202.52	1307.99	836.482	-0.284495	0.0252464	0.151916
Atf7ip2	10.8161	6.14746	4.88077	1.90994	3.58963	13.4844	3.39344	-0.492935	0.602769	NA
Atg10	83.8248	90.4555	113.071	115.551	97.8173	78.2098	107.742	0.0649391	0.790068	0.9378
Atg101	131.145	162.469	138.288	158.525	138.201	120.012	131.496	-0.0670988	0.759827	0.926475
Atg12	290.683	425.931	336.773	439.285	457.677	400.488	463.204	0.33752	0.0204287	0.131871
Atg13	405.604	293.322	292.846	258.796	321.272	311.491	223.967	-0.232989	0.163748	0.471534
Atg14	227.138	189.693	169.2	148.02	172.302	151.026	152.705	-0.307117	0.112663	0.379917
Atg16l1	650.318	486.528	412.425	416.366	476.523	426.108	500.532	-0.147634	0.388551	0.711242
Atg16l2	236.602	141.392	178.148	149.93	163.328	152.374	139.131	-0.251807	0.190885	0.512632
Atg2a	826.08	690.272	638.567	529.052	681.132	682.313	591.307	-0.203527	0.127336	0.408334
Atg2b	1426.37	1025.75	1124.2	912.949	1025.74	1112.47	908.593	-0.252173	0.0317424	0.176209
Atg3	289.331	262.584	313.183	310.365	268.325	237.326	345.282	0.00904596	0.958954	0.989406
Atg4a	48.6725	38.6412	30.0981	32.4689	40.3833	40.4533	50.9016	0.106938	0.780425	0.935124
Atg4b	409.66	381.143	388.021	380.077	358.065	380.261	380.913	-0.0659892	0.646298	0.876306
Atg4c	283.923	186.18	174.081	166.164	216.275	187.434	151.856	-0.213456	0.258612	0.59273
Atg4d	128.441	166.86	152.931	139.425	187.558	157.768	144.221	0.0708574	0.746619	0.921867
Atg5	264.995	372.36	423	396.312	318.579	268.34	372.43	-0.0511598	0.744192	0.920749
Atg7	554.325	440.861	486.45	442.15	410.115	467.91	391.094	-0.198874	0.165168	0.474158
Atg9a	406.956	408.367	390.461	308.455	347.296	315.536	359.704	-0.270469	0.0814323	0.315133
Atg9b	31.0963	26.3463	26.8442	21.0093	29.6144	17.5298	21.209	-0.314607	0.495545	0.788355
Athl1	443.46	325.815	313.183	392.492	423.576	443.638	441.147	0.262322	0.0847634	0.323037
Atic	478.613	692.028	690.628	798.353	596.775	547.468	680.384	0.0840168	0.567104	0.83373
Atl1	54.0805	64.1092	34.1654	46.7934	52.947	59.3315	61.0819	0.161718	0.622463	0.863526
Atl2	473.205	511.996	485.636	416.366	472.036	428.805	581.126	-0.0488687	0.775758	0.933366
Atl3	2416.05	2661.85	2385.88	2712.11	2992.85	2606.54	2786.86	0.157431	0.149481	0.448114
Atm	1735.98	1083.71	1340.58	1267.24	1085.86	1057.18	872.114	-0.338996	0.0248987	0.150615
Atmin	496.189	418.906	513.294	452.655	464.857	399.139	312.196	-0.219358	0.244954	0.578337
Atn1	469.149	374.995	378.259	307.5	349.989	435.547	257.901	-0.2796	0.123779	0.401071
Atoh8	32.4483	37.763	15.4558	22.9192	26.0248	29.6658	23.7541	-0.0722268	0.867753	0.964816
Atox1	139.257	338.11	385.581	401.086	323.066	271.037	481.868	0.440617	0.00468205	0.0460026
Atp10a	139.257	209.892	151.304	210.093	241.402	304.748	334.254	0.72082	0.00129578	0.0176059
Atp10b	269.051	283.661	243.225	270.256	241.402	229.235	161.188	-0.234015	0.29442	0.62592
Atp10d	620.574	240.629	276.577	284.58	324.861	370.822	296.077	-0.102228	0.516803	0.801607
Atp11a	3665.31	2734.74	2581.11	2168.73	2143.9	2227.63	2157.38	-0.437228	9.22693e-05	0.00209008
Atp11b	1076.2	973.933	986.728	948.283	1067.91	914.245	788.126	-0.121317	0.394173	0.715904
Atp11c	701.695	699.932	643.448	728.64	722.412	644.556	643.056	0.00883712	0.947722	0.985771
Atp12a	74.3607	5.26925	18.7096	19.0994	8.97407	5.39378	5.09016	-0.973469	0.139006	0.429139
Atp13a1	970.745	705.202	776.042	869.021	626.39	705.236	676.991	-0.16757	0.29574	0.627654
Atp13a2	479.965	575.227	627.178	498.493	534.854	713.327	506.471	0.00198043	0.991717	0.997982
Atp13a3	2234.88	2242.07	2149.16	1941.45	2091.85	2108.97	1591.52	-0.196409	0.137409	0.425961
Atp13a4	43.2644	3.51283	39.8596	6.68477	12.5637	4.04533	0.848359	-1.596	0.0570551	0.252796
Atp13a5	5.40805	12.2949	11.3885	2.8649	4.48703	0	6.78688	-1.42814	0.162065	NA
Atp1a1	2610.74	3760.49	3375.05	3589.72	2983.88	3038.04	2188.77	-0.12719	0.489619	0.784914
Atp1a2	3366.51	4710.71	2512.78	3332.84	5342.26	4328.51	5142.76	0.397322	0.0196438	0.127856
Atp1a3	93.2889	208.135	258.681	227.282	688.311	94.3911	307.106	0.922321	0.266545	0.600673
Atp1b1	627.334	502.335	568.609	387.717	545.623	395.094	290.139	-0.486251	0.0218379	0.138169
Atp1b2	100.049	84.308	70.7711	49.6583	102.304	78.2098	97.5613	-0.0361809	0.9119	0.975828
Atp1b3	638.15	1115.32	835.424	1047.6	1005.1	966.834	1180.92	0.30687	0.00982846	0.0791427
Atp1b4	6.76007	4.39104	8.94807	0	17.9481	5.39378	1.69672	-0.377971	0.764224	NA
Atp2a1	4671.2	5553.79	6710.24	170.939	10354.3	393.746	7602.15	-0.295767	0.844013	0.957745
[truncated: 15,247 more rows]
