# Supplementary material for: Cell-specific and shared enhancers control a high-density multi-gene locus active in mammary and salivary glands
Source: Research Square preprint supplement (doi:10.21203/rs.3.rs-2533579/v1), 2023-02-07
Supplement: Supplementary file 5 [file 951133a50c3d27b22e7f1dca.xlsx]

## Sheet: Csn3_PE_1070-allGenes-withFC-wi
Gene	WT_p18_rep1	WT_p18_rep2	WT_p18_rep3	Csn3-PE_p18_rep1	Csn3-PE_p18_rep2	Csn3-PE_p18_rep3	log2FoldChange	pvalue	padj	WT_mean	Csn3_PE_mean
0610005C13Rik	4.37442	2.06741	10.1689	5.31742	2.74393	1.95607	-0.859349	0.284148	0.445269	5.53692	3.33914
0610007P14Rik	174.977	200.538	196.599	191.427	200.307	178.491	-0.0126879	0.930805	0.96061	190.705	190.075
0610009B22Rik	181.538	161.258	154.229	176.361	166.008	182.403	0.0867482	0.541749	0.691999	165.675	174.924
0610009L18Rik	10.936	26.8763	15.2534	20.3834	25.3814	26.8959	0.500538	0.219359	0.369884	17.6886	24.2202
0610009O20Rik	452.752	438.29	467.771	352.722	314.18	390.235	-0.360413	0.00232412	0.0103605	452.938	352.379
0610010F05Rik	548.99	483.773	611.831	714.307	811.518	695.87	0.428579	0.000996103	0.005122	548.198	740.565
0610010K14Rik	104.986	107.505	84.7411	101.917	92.6078	115.408	0.070257	0.712545	0.823352	99.0774	103.311
0610011F06Rik	188.1	268.763	240.665	175.475	166.008	157.463	-0.472468	0.00199454	0.00914758	232.509	166.315
0610012G03Rik	199.036	225.347	216.937	201.176	181.1	191.205	-0.163455	0.222404	0.37378	213.774	191.16
0610030E20Rik	566.487	469.301	491.499	601.755	532.323	463.099	0.0596786	0.61476	0.750734	509.096	532.392
0610037L13Rik	203.41	175.729	249.139	183.451	209.225	221.035	-0.0349485	0.81446	0.89165	209.426	204.57
0610038B21Rik	15.3105	6.20222	8.47411	12.4073	5.48787	4.89016	-0.402884	0.509736	0.663534	9.9956	7.59512
0610039H22Rik	13.1233	4.13481	15.2534	16.8385	12.3477	2.44508	-0.267935	0.67324	0.795259	10.8372	10.5438
0610039K10Rik	0	4.13481	1.69482	1.77247	1.37197	1.95607	-0.0933008	0.943553	NA	1.94321	1.70017
0610040B10Rik	21.8721	22.7415	16.9482	16.8385	28.1253	27.3849	0.266023	0.515178	0.66834	20.5206	24.1162
0610040F04Rik	0	0	0	0	0.685984	0.978033	0.704848	0.718205	NA	0	0.554672
0610040J01Rik	201.223	322.515	393.199	510.472	372.489	546.231	0.677791	2.41626e-05	0.000223311	305.646	476.398
0610043K17Rik	37.1826	18.6066	16.9482	42.5394	43.217	43.5225	0.872674	0.0310793	0.084184	24.2458	43.0929
1010001N08Rik	4.37442	2.06741	0	0.886237	1.37197	1.46705	-0.603137	0.644181	NA	2.14727	1.24175
1110001J03Rik	172.79	128.179	116.943	80.6475	58.3086	74.3305	-0.946517	5.57053e-06	6.50619e-05	139.304	71.0955
1110002L01Rik	21.8721	26.8763	27.1172	31.9045	41.159	24.4508	0.328584	0.348046	0.512215	25.2885	32.5048
1110004E09Rik	83.114	105.438	99.9945	98.3723	117.303	135.458	0.296877	0.128712	0.249472	96.1821	117.044
1110004F10Rik	625.542	603.682	640.643	696.582	754.582	716.409	0.212193	0.0152864	0.0476107	623.289	722.524
1110006O24Rik	8.74884	4.13481	8.47411	2.65871	4.80188	11.2474	-0.17242	0.812287	0.890188	7.11925	6.23599
1110007C09Rik	98.4244	88.8984	81.3515	46.9705	40.473	45.4785	-1.00701	4.99233e-06	5.91223e-05	89.5581	44.3074
1110008F13Rik	172.79	204.673	169.482	159.523	153.66	166.755	-0.178455	0.261209	0.419084	182.315	159.979
1110008L16Rik	225.283	365.931	503.362	462.616	517.232	534.006	0.542353	0.00625216	0.0230044	364.859	504.618
1110008P14Rik	564.3	512.717	415.232	226.877	192.761	214.189	-1.22481	2.60938e-11	1.66793e-09	497.416	211.276
1110012L19Rik	135.607	159.19	152.534	129.391	146.8	161.375	-0.0243842	0.881045	0.932114	149.11	145.855
1110019D14Rik	63.4291	55.8199	32.2016	58.4916	74.7722	45.9676	0.251332	0.341881	0.505839	50.4835	59.7438
1110020A21Rik	15.3105	8.26962	8.47411	19.4972	15.7776	15.1595	0.666457	0.196585	0.341799	10.6847	16.8114
1110028F11Rik	122.484	39.2807	111.858	96.5998	101.526	45.9676	-0.195339	0.558217	0.704841	91.2076	81.3643
1110032A03Rik	172.79	206.741	244.054	241.056	271.649	272.382	0.328464	0.0210736	0.0617574	207.862	261.696
1110032F04Rik	8.74884	6.20222	11.8638	31.0183	10.9757	34.7202	1.47119	0.00730566	0.0261073	8.93827	25.5714
1110034G24Rik	48.1186	47.5503	54.2343	32.7908	52.1347	34.7202	-0.338052	0.211465	0.359871	49.9678	39.8819
1110037F02Rik	1369.19	1403.77	1277.9	1822.1	1826.77	1502.75	0.339466	2.37222e-05	0.000220441	1350.29	1717.21
1110038B12Rik	216.534	186.066	233.886	251.691	288.799	311.993	0.424011	0.00504036	0.0194203	212.162	284.161
1110038F14Rik	137.794	140.584	142.365	72.6714	80.9461	96.3363	-0.739651	3.21335e-05	0.000285409	140.248	83.3179
1110046J04Rik	2.18721	14.4718	15.2534	4.43118	0.685984	5.37918	-1.59887	0.0366422	0.0955914	10.6375	3.49878
1110051M20Rik	94.05	51.6851	57.624	55.8329	59.6806	58.193	-0.191543	0.424609	0.589273	67.7864	57.9021
1110058D11Rik	19.6849	6.20222	5.08447	20.3834	13.0337	3.91213	0.300882	0.64561	0.774905	10.3239	12.4431
1110059E24Rik	288.712	279.1	298.289	334.997	438.343	322.262	0.332481	0.0856038	0.183598	288.7	365.201
1110059G10Rik	115.922	97.168	103.384	162.181	172.868	148.661	0.609782	0.000343242	0.00211355	105.491	161.237
1110065P20Rik	26.2465	16.5392	8.47411	4.43118	1.37197	0.978033	-2.98398	6.45796e-05	0.000516265	17.0866	2.26039
1190002F15Rik	67.8035	45.4829	72.8774	35.4495	31.5552	42.5444	-0.765826	0.00456846	0.0179323	62.0546	36.5164
1190002N15Rik	236.219	341.122	247.444	457.298	405.416	333.998	0.51937	0.00118852	0.00596093	274.928	398.904
1190007I07Rik	52.493	49.6177	55.9292	38.1082	46.6469	24.4508	-0.581868	0.0424952	0.107164	52.68	36.402
1200014J11Rik	450.565	551.997	552.512	533.514	559.763	596.111	0.124441	0.23789	0.392425	518.358	563.129
1300002E11Rik	188.1	138.516	157.619	204.721	246.954	166.266	0.343858	0.0669308	0.152567	161.412	205.98
1300017J02Rik	10.936	10.337	15.2534	5.31742	11.6617	6.35721	-0.686025	0.238231	0.392817	12.1755	7.77878
1500004A13Rik	72.1779	28.9437	23.7275	43.4256	33.6132	26.8959	-0.180909	0.589505	0.730587	41.6164	34.6449
1500009L16Rik	8.74884	10.337	3.38965	10.6348	5.48787	5.37918	-0.0732745	0.91163	0.949554	7.49184	7.1673
1500011B03Rik	34.9953	39.2807	38.9809	46.0843	39.787	42.5444	0.172726	0.546868	0.695553	37.7523	42.8053
1500011K16Rik	83.114	72.3592	59.3188	49.6293	52.8207	46.9456	-0.514479	0.0303932	0.0828102	71.5973	49.7985
1500012F01Rik	393.698	353.526	510.142	374.878	512.43	544.275	0.193168	0.282634	0.443443	419.122	477.194
1500015A07Rik	41.557	18.6066	32.2016	50.5155	34.2992	50.8577	0.549368	0.0810209	0.175818	30.7884	45.2241
1500015L24Rik	2.18721	0	6.77929	0.886237	1.37197	1.46705	-1.25001	0.321241	NA	2.98883	1.24175
1500015O10Rik	137.794	140.584	155.924	103.69	100.154	107.095	-0.486454	0.00607015	0.0224863	144.767	103.646
1500017E21Rik	2.18721	4.13481	8.47411	1.77247	2.74393	3.42312	-0.872579	0.318085	NA	4.93204	2.64651
1500026H17Rik	28.4337	28.9437	16.9482	31.0183	39.787	23.9618	0.350324	0.288296	0.449831	24.7752	31.589
1600002D24Rik	24.0593	4.13481	8.47411	9.7486	16.4636	10.7584	0.0757561	0.906399	0.94724	12.2227	12.3235
1600002H07Rik	76.5523	90.9658	91.5204	68.2402	56.9366	93.4022	-0.241004	0.241852	0.397246	86.3462	72.8597
1600002K03Rik	113.735	107.505	77.9619	63.809	58.9946	77.2646	-0.549998	0.0224939	0.0649972	99.7339	66.6894
1600010M07Rik	4.37442	0	1.69482	1.77247	2.05795	2.44508	0.144366	0.904646	NA	2.02308	2.09184
1600012H06Rik	365.264	409.346	399.978	457.298	493.222	406.862	0.201628	0.0720713	0.161206	391.529	452.461
1600014C10Rik	411.195	417.616	427.095	423.621	407.474	466.522	0.0486387	0.65348	0.781281	418.636	432.539
1600020E01Rik	76.5523	64.0896	77.9619	65.5815	76.1442	70.4184	-0.0437286	0.83469	0.90443	72.8679	70.7147
1600023N17Rik	6.56163	2.06741	3.38965	5.31742	1.37197	3.91213	-0.179864	0.839067	0.907885	4.00623	3.53384
1600029I14Rik	4.37442	0	1.69482	0	0.685984	0	-2.8984	0.110217	NA	2.02308	0.228661
1600029O15Rik	4.37442	4.13481	3.38965	1.77247	6.17385	0.489016	-1.00653	0.367002	NA	3.96629	2.81178
1700001C19Rik	13.1233	0	3.38965	1.77247	1.37197	0	-2.34973	0.0558198	NA	5.5043	1.04815
1700001D01Rik	19.6849	8.26962	8.47411	12.4073	13.7197	8.8023	-0.0239162	0.968012	0.980896	12.1429	11.6431
1700001G11Rik	0	0	0	0.886237	0	2.9341	1.63742	0.396332	NA	0	1.27345
1700001G17Rik	0	2.06741	1.69482	0	1.37197	2.9341	0.211058	0.883158	NA	1.25408	1.43536
1700001J03Rik	10.936	2.06741	5.08447	2.65871	4.80188	2.44508	-0.818463	0.337732	NA	6.02931	3.30189
1700001K19Rik	17.4977	8.26962	6.77929	7.97613	4.80188	9.29131	-0.484893	0.424082	0.588598	10.8489	7.35644
1700001K23Rik	8.74884	6.20222	6.77929	9.7486	6.17385	3.91213	-0.175085	0.825606	0.899186	7.24345	6.61153
1700001L05Rik	150.917	215.01	199.989	195.858	323.784	213.7	0.38214	0.0827063	0.178663	188.639	244.448
1700001L19Rik	0	2.06741	0	0	0.685984	0.489016	-0.743069	0.691079	NA	0.689135	0.391667
1700001O22Rik	19.6849	16.5392	23.7275	10.6348	8.91779	13.6925	-0.849705	0.0385946	0.0994785	19.9839	11.0817
1700001P01Rik	10.936	2.06741	3.38965	0.886237	3.42992	0.978033	-1.56431	0.110813	NA	5.46437	1.76473
1700003E16Rik	28.4337	20.6741	22.0327	14.1798	8.91779	11.2474	-1.07517	0.0285628	0.0787785	23.7135	11.4483
1700003F12Rik	2.18721	2.06741	0	1.77247	0.685984	1.95607	0.028112	0.986525	NA	1.4182	1.47151
1700003G13Rik	56.8674	12.4044	22.0327	25.7009	24.6954	14.1815	-0.425609	0.335039	0.4987	30.4349	21.5259
1700007J10Rik	32.8081	16.5392	22.0327	31.9045	28.1253	19.5607	0.153703	0.694612	0.810726	23.7934	26.5302
1700007K13Rik	0	0	0	5.31742	3.42992	0.978033	2.97878	0.0441637	NA	0	3.24179
1700007L15Rik	8.74884	18.6066	11.8638	11.5211	11.6617	11.7364	-0.123931	0.805337	0.885436	13.0731	11.6397
1700008J07Rik	39.3698	22.7415	20.3379	38.1082	37.0431	34.2312	0.437053	0.167747	0.30418	27.483	36.4608
1700009J07Rik	0	0	1.69482	0	0.685984	1.95607	0.17957	0.918881	NA	0.564941	0.880683
1700010I14Rik	21.8721	12.4044	8.47411	15.066	20.5795	19.5607	0.449006	0.326608	0.490763	14.2502	18.4021
1700011H14Rik	0	2.06741	1.69482	1.77247	2.74393	1.46705	0.703233	0.610252	NA	1.25408	1.99449
1700011L22Rik	0	2.06741	1.69482	1.77247	3.42992	0.489016	0.293497	0.836915	NA	1.25408	1.89714
1700012B07Rik	203.41	252.223	215.243	200.289	266.848	223.97	0.064478	0.808901	0.887757	223.625	230.369
1700012D01Rik	10.936	8.26962	6.77929	4.43118	13.7197	8.31328	0.0651155	0.911687	0.949554	8.66165	8.82138
1700012D14Rik	37.1826	6.20222	8.47411	16.8385	18.5216	11.2474	0.0418809	0.936203	0.963825	17.2863	15.5358
1700012D16Rik	15.3105	2.06741	5.08447	5.31742	5.48787	0.978033	-0.914718	0.281003	NA	7.48745	3.92777
1700015E13Rik	32.8081	10.337	28.812	33.677	28.1253	21.0277	0.179836	0.683269	0.802885	23.9857	27.61
1700016C15Rik	6.56163	18.6066	28.812	16.8385	20.5795	20.0497	0.245927	0.639292	0.7698	17.9934	19.1559
1700016H13Rik	4.37442	2.06741	0	2.65871	0.685984	1.95607	-0.220578	0.863686	NA	2.14727	1.76692
1700017B05Rik	478.999	607.817	415.232	324.363	315.552	376.054	-0.55036	0.000136776	0.000971875	500.683	338.656
1700018L02Rik	0	0	3.38965	1.77247	1.37197	5.37918	1.15116	0.404934	NA	1.12988	2.84121
1700019D03Rik	28.4337	31.0111	45.7602	43.4256	41.845	35.6982	0.159064	0.596584	0.73601	35.0683	40.3229
1700019G17Rik	72.1779	115.775	118.638	130.277	159.148	126.166	0.443715	0.0274685	0.076367	102.197	138.53
1700019L03Rik	6.56163	10.337	5.08447	1.77247	4.80188	7.82426	-0.55008	0.443176	0.606993	7.32771	4.79954
1700020A23Rik	2.18721	4.13481	1.69482	1.77247	1.37197	0.978033	-1.03366	0.450363	NA	2.67228	1.37416
1700020D05Rik	15.3105	2.06741	6.77929	1.77247	4.80188	4.40115	-0.8985	0.264523	0.422933	8.05239	3.6585
1700020I14Rik	688.971	618.154	622	888.895	904.126	736.948	0.383189	4.63958e-05	0.000389445	643.042	843.323
1700020L24Rik	21.8721	10.337	15.2534	18.611	8.2318	12.2254	-0.266329	0.585677	0.72737	15.8208	13.0227
1700021F05Rik	133.42	212.943	179.651	150.66	139.941	167.733	-0.19315	0.247579	0.403829	175.338	152.778
1700021K19Rik	483.373	454.829	466.076	380.196	327.214	407.84	-0.331988	0.00292558	0.0125159	468.093	371.75
1700022H01Rik	2.18721	0	5.08447	0.886237	0	0.978033	-1.96755	0.212017	NA	2.42389	0.621423
1700022I11Rik	8.74884	16.5392	8.47411	3.54495	2.74393	12.7144	-0.905033	0.196295	0.341513	11.2541	6.33444
1700024F13Rik	2.18721	0	0	0.886237	1.37197	1.95607	1.07754	0.522293	NA	0.72907	1.40476
1700024I08Rik	2.18721	0	0	0	2.74393	0	-0.713416	0.884644	NA	0.72907	0.914645
1700024P16Rik	155.292	82.6962	79.6567	116.097	128.965	92.9131	0.116394	0.549373	0.697305	105.882	112.658
1700025G04Rik	1207.34	1027.5	1193.16	1502.17	1349.33	1434.29	0.320797	0.001204	0.00601884	1142.67	1428.6
1700025N23Rik	8.74884	2.06741	6.77929	4.43118	3.42992	3.91213	-0.576625	0.488671	NA	5.86518	3.92441
1700026D08Rik	17.4977	14.4718	6.77929	9.7486	9.60377	6.35721	-0.570794	0.295909	0.457453	12.9163	8.56986
1700026L06Rik	4.37442	6.20222	0	2.65871	3.42992	0.978033	-0.611286	0.592811	NA	3.52554	2.35555
1700027J07Rik	4.37442	10.337	8.47411	9.7486	7.54582	2.9341	-0.298243	0.675455	0.796889	7.72852	6.74284
1700028E10Rik	32.8081	22.7415	20.3379	33.677	33.6132	14.6705	0.0601926	0.875985	0.929356	25.2958	27.3202
1700028J19Rik	2.18721	0	8.47411	2.65871	1.37197	1.46705	-1.06081	0.301368	NA	3.55377	1.83258
1700028K03Rik	4.37442	0	8.47411	15.9523	19.8935	10.2693	1.77995	0.01672	0.0512501	4.28284	15.3717
1700029H14Rik	2.18721	0	0	0.886237	0.685984	2.44508	0.855257	0.609473	NA	0.72907	1.3391
1700029I15Rik	17.4977	12.4044	16.9482	9.7486	11.6617	11.2474	-0.512559	0.276072	0.435819	15.6168	10.8859
1700029J07Rik	39.3698	24.8089	23.7275	31.0183	34.9852	37.6543	0.265151	0.425814	0.590252	29.3021	34.5526
1700030A11Rik	0	0	0	2.65871	1.37197	1.95607	2.44171	0.17684	NA	0	1.99558
1700030C10Rik	28.4337	33.0785	8.47411	6.20366	7.54582	16.1375	-1.23582	0.0353556	0.0928374	23.3288	9.96234
1700030J22Rik	15.3105	12.4044	15.2534	9.7486	21.2655	16.6266	0.167598	0.732484	0.836472	14.3228	15.8802
1700030K09Rik	67.8035	68.2244	113.553	100.145	77.5161	81.6658	0.0274805	0.901488	0.944714	83.1937	86.4422
1700034H15Rik	6.56163	2.06741	8.47411	16.8385	8.91779	8.8023	0.972744	0.160806	0.295046	5.70105	11.5195
1700034I23Rik	26.2465	4.13481	6.77929	13.2936	10.2898	9.78033	0.0206085	0.975278	0.985432	12.3869	11.1212
1700034J05Rik	48.1186	16.5392	25.4223	38.1082	24.0094	14.1815	-0.220417	0.589255	0.730448	30.0267	25.433
1700034P13Rik	4.37442	2.06741	5.08447	0	0	0	-4.98355	0.00171733	NA	3.8421	0
1700037C18Rik	39.3698	37.2133	25.4223	14.1798	8.91779	20.0497	-1.27109	0.00190556	0.00880825	34.0018	14.3824
1700037H04Rik	85.3012	117.842	127.112	73.5576	80.9461	94.3802	-0.40188	0.0436919	0.109454	110.085	82.9613
1700040L02Rik	17.4977	12.4044	11.8638	12.4073	20.5795	25.9179	0.520404	0.288847	0.450322	13.922	19.6349
1700042G15Rik	6.56163	6.20222	3.38965	4.43118	5.48787	0.978033	-0.734058	0.365717	0.530081	5.3845	3.63236
1700047A11Rik	13.1233	4.13481	10.1689	9.7486	6.85984	10.2693	-0.00149141	0.998044	0.998501	9.14233	8.95926
1700047G03Rik	8.74884	0	10.1689	3.54495	2.74393	8.31328	-0.407272	0.604258	0.74248	6.30592	4.86739
1700048M11Rik	10.936	2.06741	5.08447	4.43118	6.85984	4.89016	-0.0597081	0.939679	0.965505	6.02931	5.39373
1700048O20Rik	6.56163	12.4044	18.6431	15.9523	15.0916	11.7364	0.139313	0.800683	0.882351	12.5364	14.2601
1700049G17Rik	183.726	165.392	138.975	211.811	233.234	153.062	0.280734	0.124657	0.244122	162.698	199.369
1700052K11Rik	41.557	53.7525	66.0981	54.9467	47.3329	58.682	-0.00387428	0.988057	0.99311	53.8025	53.6538
1700056E22Rik	4.37442	2.06741	3.38965	3.54495	2.05795	5.8682	0.255635	0.791022	NA	3.27716	3.8237
1700061G19Rik	8.74884	4.13481	1.69482	3.54495	4.80188	8.8023	0.356385	0.678774	0.7992	4.85949	5.71638
1700065J18Rik	4.37442	2.06741	0	2.65871	0	0.489016	-0.829087	0.628391	NA	2.14727	1.04924
1700066B19Rik	4.37442	14.4718	18.6431	15.9523	11.6617	17.1156	0.299505	0.580762	0.723915	12.4964	14.9099
1700066M21Rik	131.233	126.112	144.06	153.319	159.148	140.837	0.163007	0.316888	0.480268	133.801	151.101
1700067G17Rik	0	2.06741	3.38965	3.54495	1.37197	2.9341	0.593072	0.638909	NA	1.81902	2.617
1700067K01Rik	8.74884	4.13481	5.08447	7.08989	9.60377	4.40115	0.211072	0.755831	0.853046	5.98937	7.0316
1700071M16Rik	19.6849	8.26962	13.5586	20.3834	22.6375	20.0497	0.619773	0.173414	0.311396	13.8377	21.0235
1700084C01Rik	6.56163	0	1.69482	0	0	1.46705	-2.23105	0.174288	NA	2.75215	0.489016
1700084E18Rik	10.936	6.20222	3.38965	3.54495	4.1159	7.82426	-0.373493	0.614307	0.750381	6.84264	5.1617
1700084J12Rik	10.936	10.337	5.08447	4.43118	6.17385	0.978033	-1.39805	0.107941	NA	8.78585	3.86102
1700086O06Rik	54.6802	47.5503	40.6757	43.4256	67.2264	54.2808	0.22765	0.369824	0.533915	47.6354	54.9776
1700088E04Rik	0	2.06741	8.47411	3.54495	1.37197	2.44508	-0.605509	0.530883	NA	3.51384	2.454
1700092M07Rik	8.74884	8.26962	3.38965	2.65871	3.42992	3.42312	-1.05168	0.208079	NA	6.8027	3.17058
1700093K21Rik	6.56163	4.13481	1.69482	1.77247	3.42992	1.46705	-0.842147	0.415647	NA	4.13042	2.22315
1700094D03Rik	94.05	66.157	74.5722	115.211	80.2601	65.5282	0.137365	0.577348	0.72061	78.2597	86.9997
1700094J05Rik	0	2.06741	0	1.77247	2.05795	1.95607	1.45012	0.365351	NA	0.689135	1.92883
1700095J12Rik	4.37442	12.4044	8.47411	11.5211	13.7197	8.8023	0.408293	0.480101	0.639674	8.41765	11.3477
1700096K18Rik	30.6209	24.8089	13.5586	33.677	32.9272	27.8739	0.480995	0.162887	0.297944	22.9961	31.4927
1700099I09Rik	13.1233	0	20.3379	23.0422	34.2992	13.6925	0.982224	0.111828	0.224515	11.1537	23.6779
1700101E01Rik	2.18721	0	0	1.77247	2.74393	1.46705	1.50713	0.321421	NA	0.72907	1.99449
1700101I11Rik	0	2.06741	0	0.886237	0	0.489016	-0.824449	0.693136	NA	0.689135	0.458418
1700102H20Rik	10.936	10.337	1.69482	6.20366	8.91779	3.91213	-0.231408	0.728979	0.833953	7.65597	6.34452
1700102P08Rik	2.18721	6.20222	8.47411	4.43118	2.74393	2.9341	-0.780096	0.302631	0.465308	5.62118	3.36974
1700105P06Rik	6.56163	4.13481	0	1.77247	2.05795	1.95607	-0.752162	0.499171	NA	3.56548	1.92883
1700108F19Rik	2.18721	0	1.69482	1.77247	1.37197	1.95607	0.383583	0.791315	NA	1.29401	1.70017
1700108J01Rik	0	2.06741	1.69482	4.43118	4.1159	2.44508	1.6208	0.240183	NA	1.25408	3.66406
1700109G15Rik	2.18721	4.13481	0	0	1.37197	0	-2.43064	0.173486	NA	2.10734	0.457322
1700109H08Rik	50.3058	24.8089	33.8965	42.5394	42.531	28.363	0.0510301	0.866659	0.923982	36.337	37.8111
1700109K24Rik	100.612	28.9437	38.9809	67.354	71.3423	33.7421	0.0852436	0.786342	0.872994	56.1787	57.4795
1700110C19Rik	2.18721	2.06741	1.69482	4.43118	6.85984	2.44508	1.14715	0.268511	NA	1.98315	4.5787
1700110K17Rik	13.1233	10.337	3.38965	11.5211	6.85984	4.40115	-0.219503	0.745815	0.84574	8.94998	7.59402
1700112E06Rik	6.56163	12.4044	5.08447	14.1798	13.0337	9.78033	0.610387	0.285858	0.447169	8.01684	12.3313
1700112J16Rik	2.18721	12.4044	11.8638	8.86237	7.54582	6.35721	-0.222608	0.721051	0.828856	8.81847	7.58847
1700113A16Rik	48.1186	70.2918	50.8447	68.2402	89.8638	63.5721	0.386284	0.107936	0.218924	56.4184	73.8921
1700119H24Rik	17.4977	2.06741	1.69482	7.97613	9.60377	3.91213	0.258548	0.739816	0.841436	7.08663	7.16401
1700120C14Rik	2.18721	0	0	0	2.74393	0	-0.25886	0.91207	NA	0.72907	0.914645
1700120E14Rik	17.4977	6.20222	13.5586	13.2936	19.2075	6.35721	-0.0238687	0.965475	0.97944	12.4195	12.9528
1700120G07Rik	2.18721	2.06741	1.69482	0	0.685984	0.489016	-2.22013	0.196324	NA	1.98315	0.391667
1700120K04Rik	15.3105	4.13481	6.77929	7.97613	6.17385	4.89016	-0.419192	0.508288	0.662112	8.74152	6.34672
1700123I01Rik	2.18721	0	0	0	0.685984	0	-1.55074	0.479944	NA	0.72907	0.228661
1700123M08Rik	8.74884	8.26962	8.47411	9.7486	8.91779	5.37918	-0.119508	0.849397	0.913884	8.49752	8.01519
1700123O20Rik	209.972	289.437	266.087	218.014	247.64	240.107	-0.114391	0.40739	0.572136	255.165	235.254
1700124L16Rik	0	0	0	0.886237	2.74393	1.46705	2.2067	0.16476	NA	0	1.69907
1700125H03Rik	4.37442	2.06741	1.69482	1.77247	3.42992	1.95607	-0.119059	0.911496	NA	2.71222	2.38615
1700126H18Rik	6.56163	2.06741	0	0.886237	1.37197	1.46705	-1.09617	0.432964	NA	2.87634	1.24175
1810006J02Rik	0	0	3.38965	1.77247	4.1159	3.42312	1.42223	0.343787	NA	1.12988	3.10383
1810009A15Rik	0	4.13481	0	1.77247	0.685984	0.978033	-0.11749	0.940067	NA	1.37827	1.1455
1810010D01Rik	8.74884	0	10.1689	1.77247	3.42992	1.95607	-1.36134	0.222008	NA	6.30592	2.38615
1810010H24Rik	8.74884	6.20222	13.5586	12.4073	4.80188	11.2474	-0.0470574	0.935213	0.963337	9.50321	9.48553
1810011H11Rik	39.3698	41.3481	47.455	37.2219	38.4151	34.2312	-0.224731	0.470899	0.630864	42.7243	36.6227
1810011O10Rik	452.752	411.414	532.174	661.133	592.69	731.08	0.504726	0.000326816	0.00202958	465.447	661.634
1810012K16Rik	10.936	4.13481	1.69482	5.31742	4.80188	8.8023	0.353983	0.634048	0.766204	5.58856	6.3072
1810013A23Rik	19.6849	6.20222	8.47411	5.31742	4.1159	1.95607	-1.57777	0.0362922	0.0948078	11.4537	3.79646
1810013L24Rik	828.952	738.064	720.3	1098.05	1103.06	976.077	0.473549	2.37677e-06	3.1194e-05	762.439	1059.06
1810014B01Rik	41.557	35.1459	52.5395	50.5155	57.6226	48.4126	0.264812	0.328854	0.493052	43.0808	52.1836
1810019D21Rik	185.913	111.64	76.267	119.642	117.989	132.523	0.047936	0.832171	0.902918	124.607	123.385
1810020O05Rik	4.37442	4.13481	0	2.65871	2.05795	1.46705	-0.340639	0.803919	NA	2.83641	2.06124
1810021B22Rik	21.8721	22.7415	16.9482	11.5211	4.1159	10.2693	-1.25437	0.00935889	0.0318007	20.5206	8.63544
1810022K09Rik	310.584	231.549	286.425	373.106	391.011	315.905	0.375503	0.0213621	0.0623993	276.186	360.007
1810024B03Rik	4.37442	4.13481	5.08447	5.31742	2.74393	3.42312	-0.280785	0.722698	0.829505	4.53123	3.82816
1810026B05Rik	487.748	260.493	310.153	576.054	655.114	387.79	0.613887	7.42297e-05	0.000582438	352.798	539.653
1810026J23Rik	345.579	504.447	444.044	520.221	484.99	526.182	0.248352	0.0464686	0.114482	431.357	510.464
1810030O07Rik	308.397	411.414	389.809	444.891	526.149	422.51	0.324519	0.0123359	0.0399187	369.873	464.517
1810032O08Rik	133.42	121.977	145.755	96.5998	85.062	113.452	-0.441462	0.0139269	0.0440865	133.717	98.3712
1810034E14Rik	24.0593	12.4044	25.4223	16.8385	17.8356	13.6925	-0.377415	0.374933	0.538889	20.6287	16.1222
1810037I17Rik	317.145	274.965	298.289	199.403	292.915	237.662	-0.286063	0.0485107	0.118462	296.8	243.327
1810041H14Rik	2.18721	2.06741	8.47411	3.54495	3.42992	4.89016	-0.126352	0.885402	0.93517	4.24291	3.95501
1810043G02Rik	249.342	243.954	267.782	188.768	161.892	222.503	-0.412401	0.00717438	0.0257163	253.693	191.054
1810043H04Rik	32.8081	35.1459	35.5913	19.4972	16.4636	25.4289	-0.74391	0.0217268	0.0631626	34.5151	20.4632
1810044D09Rik	10.936	14.4718	13.5586	13.2936	16.4636	19.5607	0.376468	0.410364	0.575361	12.9888	16.4393
1810055G02Rik	131.233	107.505	79.6567	77.9888	61.0525	72.3744	-0.555925	0.0118348	0.0385668	106.131	70.4719
1810058I24Rik	131.233	192.269	130.501	133.822	126.907	172.134	-0.0588024	0.742222	0.843231	151.334	144.287
1810062G17Rik	30.6209	4.13481	18.6431	12.4073	15.0916	22.4948	-0.06488	0.893051	0.93949	17.7996	16.6646
1810062O18Rik	4.37442	2.06741	6.77929	9.7486	4.80188	2.44508	0.285095	0.752244	0.850569	4.40704	5.66519
1810064F22Rik	6.56163	2.06741	8.47411	10.6348	8.91779	6.84623	0.566322	0.39673	0.561553	5.70105	8.79962
2010001A14Rik	19.6849	12.4044	27.1172	15.066	21.9515	24.9398	0.0698005	0.871863	0.927087	19.7355	20.6524
2010001E11Rik	2.18721	2.06741	0	3.54495	2.05795	2.9341	1.1127	0.382761	NA	1.4182	2.84567
2010003K11Rik	15.3105	12.4044	20.3379	7.08989	4.1159	6.35721	-1.46777	0.0123798	0.040052	16.0176	5.85434
2010009K17Rik	10.936	10.337	3.38965	4.43118	3.42992	2.9341	-1.18053	0.128863	NA	8.22091	3.5984
2010012O05Rik	96.2372	99.2355	96.6049	74.4439	103.584	89.49	-0.11973	0.542251	0.692292	97.3592	89.1725
2010016I18Rik	19.6849	6.20222	10.1689	25.7009	17.8356	15.1595	0.718272	0.206634	0.354167	12.0187	19.5653
2010106C02Rik	6.56163	0	5.08447	3.54495	3.42992	2.44508	-0.29549	0.755612	NA	3.88203	3.13998
2010107E04Rik	688.971	591.278	713.52	706.331	933.624	646.48	0.180055	0.222762	0.3743	664.59	762.145
2010107G12Rik	6.56163	2.06741	5.08447	1.77247	3.42992	0	-1.69398	0.125817	NA	4.57117	1.73413
2010107G23Rik	61.2419	76.494	88.1308	101.031	81.632	105.139	0.359426	0.131368	0.253166	75.2889	95.9339
2010109A12Rik	17.4977	6.20222	6.77929	7.08989	6.17385	7.82426	-0.451713	0.456918	0.618495	10.1597	7.02934
2010109I03Rik	2.18721	4.13481	6.77929	1.77247	4.1159	3.91213	-0.38268	0.675756	NA	4.3671	3.26684
2010111I01Rik	1104.54	642.963	642.338	743.553	819.064	734.992	-0.0237076	0.855962	0.917394	796.614	765.87
2010204K13Rik	8.74884	2.06741	6.77929	4.43118	6.17385	9.78033	0.237451	0.735425	0.838439	5.86518	6.79512
2010300C02Rik	448.378	475.503	493.193	368.674	328.586	418.109	-0.342737	0.00126821	0.00629039	472.358	371.79
2010310C07Rik	4.37442	6.20222	0	2.65871	2.05795	0.978033	-0.907717	0.420554	NA	3.52554	1.89823
2010315B03Rik	658.35	479.638	472.856	685.947	629.047	536.451	0.208617	0.0879936	0.187666	536.948	617.148
2010320M18Rik	89.6756	90.9658	79.6567	40.7669	49.3908	66.9953	-0.696386	0.00147865	0.0071395	86.766	52.3843
2200002D01Rik	30.6209	28.9437	25.4223	12.4073	15.0916	21.5167	-0.754204	0.0345461	0.0911818	28.329	16.3386
2210013O21Rik	122.484	171.595	145.755	139.139	169.438	143.282	0.0331961	0.837111	0.906153	146.611	150.62
2210015D19Rik	85.3012	90.9658	108.469	78.8751	80.9461	76.2866	-0.281586	0.14148	0.267964	94.9119	78.7026
2210016F16Rik	321.52	421.751	371.166	327.021	351.91	391.702	-0.0522185	0.705953	0.818666	371.479	356.878
2210016L21Rik	111.548	152.988	132.196	93.9411	80.9461	121.276	-0.414465	0.0157778	0.0488922	132.244	98.7211
2210018M11Rik	345.579	316.313	328.796	419.19	381.407	367.251	0.233466	0.0449311	0.111557	330.229	389.283
2210039B01Rik	10.936	4.13481	3.38965	4.43118	6.17385	5.37918	-0.0365935	0.96428	0.978951	6.1535	5.32807
2210404O09Rik	83.114	64.0896	57.624	83.3062	90.5498	68.9513	0.248029	0.319498	0.483265	68.2758	80.9358
2210406O10Rik	2.18721	2.06741	5.08447	6.20366	3.42992	13.2034	1.27496	0.110875	0.223137	3.11303	7.61234
2210408F21Rik	45.9314	33.0785	35.5913	17.7247	31.5552	16.1375	-0.829932	0.0138825	0.0439783	38.2004	21.8058
2210408I21Rik	216.534	142.651	106.774	184.337	204.423	126.166	0.156247	0.359146	0.523139	155.32	171.642
2210409D07Rik	0	0	3.38965	0.886237	0.685984	1.46705	-0.115213	0.948882	NA	1.12988	1.01309
2210416O15Rik	2.18721	2.06741	1.69482	7.97613	4.80188	8.31328	1.83883	0.0729638	0.162464	1.98315	7.03043
2210417A02Rik	0	0	1.69482	0.886237	0.685984	0.489016	-0.141448	0.942707	NA	0.564941	0.687079
2300009A05Rik	37.1826	51.6851	35.5913	38.1082	41.845	29.341	-0.197469	0.522894	0.675011	41.4863	36.4314
2310001H17Rik	115.922	72.3592	72.8774	85.965	91.2358	55.7479	-0.17473	0.436482	0.600678	87.0529	77.6495
2310001K24Rik	0	0	1.69482	0.886237	2.74393	0.978033	1.0658	0.493275	NA	0.564941	1.53607
2310002F09Rik	0	0	3.38965	2.65871	4.1159	1.95607	1.23921	0.362106	NA	1.12988	2.91023
2310002L09Rik	0	8.26962	22.0327	1.77247	0	0.489016	-3.39924	0.0259122	NA	10.1008	0.75383
2310007B03Rik	0	0	1.69482	1.77247	2.05795	2.9341	1.6829	0.266333	NA	0.564941	2.25484
2310009A05Rik	113.735	99.2355	94.9101	112.552	101.526	90.4681	-0.020321	0.909789	0.948597	102.627	101.515
2310009B15Rik	59.0547	41.3481	35.5913	22.1559	24.6954	33.7421	-0.715857	0.016141	0.0498357	45.3313	26.8645
2310010G23Rik	8.74884	2.06741	0	10.6348	14.4057	5.8682	1.66166	0.0529833	0.126989	3.60541	10.3029
2310010J17Rik	17.4977	6.20222	11.8638	10.6348	15.0916	18.0936	0.360741	0.468167	0.628126	11.8546	14.6067
2310011J03Rik	271.214	281.167	291.51	152.433	168.752	205.387	-0.677478	0.000268173	0.0017246	281.297	175.524
2310015A10Rik	166.228	97.168	132.196	187.882	163.95	147.194	0.335203	0.0612983	0.142383	131.864	166.342
2310015D24Rik	0	2.06741	5.08447	0.886237	0.685984	0	-2.10742	0.220576	NA	2.38396	0.524073
2310022A10Rik	52.493	62.0222	62.7084	51.4017	44.5889	65.0392	-0.134641	0.603061	0.741546	59.0745	53.6766
2310022B05Rik	181.538	194.336	171.177	218.9	181.786	217.123	0.177653	0.204254	0.351435	182.351	205.936
2310030G06Rik	78.7395	82.6962	96.6049	133.822	132.395	133.991	0.642837	0.00340285	0.0141727	86.0135	133.402
2310033P09Rik	137.794	103.37	77.9619	86.8512	76.1442	113.941	-0.188269	0.386599	0.550939	106.375	92.3121
2310034G01Rik	63.4291	47.5503	45.7602	41.6531	45.2749	35.2092	-0.358934	0.19052	0.33375	52.2465	40.7124
2310035C23Rik	1395.44	1186.69	1057.57	1552.69	1771.9	1197.11	0.304617	0.00336586	0.01408	1213.23	1507.23
2310036O22Rik	312.771	361.796	342.354	319.931	349.852	354.048	0.012536	0.913351	0.95056	338.974	341.277
2310039H08Rik	159.666	136.449	125.417	81.5338	65.8544	84.1108	-0.849019	2.93447e-06	3.75774e-05	140.511	77.1663
2310040G24Rik	4.37442	10.337	18.6431	8.86237	10.2898	14.6705	0.0448239	0.930282	0.960329	11.1182	11.2742
2310045N01Rik	264.652	235.684	225.411	203.834	192.761	225.437	-0.213248	0.17067	0.308242	241.916	207.344
2310047M10Rik	39.3698	78.5614	59.3188	38.1082	40.473	47.9236	-0.468212	0.0868468	0.18582	59.0833	42.1683
2310057J18Rik	6.56163	0	0	1.77247	1.37197	0.978033	-0.366492	0.777529	NA	2.18721	1.37416
2310057M21Rik	89.6756	68.2244	61.0136	88.6237	98.7816	78.7317	0.289378	0.179622	0.31912	72.9712	88.7123
2310061I04Rik	65.6163	68.2244	64.4033	53.1742	75.4582	49.8797	-0.160645	0.518993	0.671408	66.0813	59.504
2310067B10Rik	542.428	684.311	540.648	391.717	314.18	419.576	-0.653349	1.08113e-05	0.000112894	589.129	375.158
2310068J16Rik	0	0	1.69482	2.65871	8.2318	7.33525	3.13749	0.0183474	0.0551649	0.564941	6.07525
2310069B03Rik	0	2.06741	3.38965	2.65871	0.685984	0.978033	-0.303412	0.830871	NA	1.81902	1.44091
2310069G16Rik	0	0	1.69482	2.65871	0	0.978033	0.647151	0.720033	NA	0.564941	1.21225
2400006E01Rik	39.3698	20.6741	15.2534	32.7908	35.6711	12.2254	0.0766165	0.859522	0.919983	25.0991	26.8958
2410002F23Rik	402.447	452.762	435.569	286.254	295.659	458.208	-0.323166	0.0275193	0.0764593	430.259	346.707
2410004B18Rik	150.917	144.718	118.638	116.097	148.172	117.364	-0.111405	0.521338	0.673528	138.091	127.211
2410004P03Rik	0	2.06741	5.08447	0.886237	0.685984	0.489016	-1.74361	0.307682	NA	2.38396	0.687079
2410006H16Rik	382.762	324.583	342.354	196.745	260.674	231.305	-0.604106	0.00215127	0.00974933	349.899	229.574
2410015M20Rik	524.93	485.84	494.888	364.243	408.846	416.153	-0.335901	0.00849917	0.029476	501.886	396.414
2410016O06Rik	111.548	254.291	166.093	129.391	140.627	206.365	-0.12538	0.550855	0.698515	177.31	158.794
2410018L13Rik	0	0	0	0.886237	0.685984	0.489016	0.870711	0.666521	NA	0	0.687079
2410021H03Rik	4.37442	2.06741	5.08447	0.886237	4.80188	2.44508	-0.479504	0.630459	NA	3.8421	2.71107
2410089E03Rik	533.679	430.02	391.504	623.024	607.781	433.758	0.289479	0.0577274	0.135991	451.734	554.854
2410127L17Rik	59.0547	86.831	64.4033	107.235	117.989	104.161	0.64763	0.00193526	0.00891856	70.0963	109.795
2410131K14Rik	135.607	175.729	142.365	142.684	95.3517	141.326	-0.257566	0.192207	0.335966	151.234	126.454
2500002B13Rik	13.1233	12.4044	20.3379	25.7009	19.8935	14.6705	0.342377	0.427976	0.591919	15.2885	20.0883
2500004C02Rik	52.493	47.5503	37.2861	50.5155	53.5067	46.4566	0.139766	0.625764	0.75992	45.7765	50.1596
2510002D24Rik	111.548	99.2355	133.891	113.438	132.395	121.765	0.086615	0.615255	0.751158	114.891	122.533
2510003B16Rik	2.18721	2.06741	3.38965	2.65871	2.74393	3.42312	0.200935	0.842457	NA	2.54809	2.94192
2510009E07Rik	341.205	434.155	420.316	556.557	568.68	512	0.447112	8.0546e-05	0.00062462	398.559	545.746
2510039O18Rik	380.574	547.862	398.283	235.739	219.515	313.949	-0.775771	1.61568e-08	4.24102e-07	442.24	256.401
2610001J05Rik	120.297	121.977	127.112	206.493	230.49	197.563	0.77477	2.32386e-05	0.000217227	123.128	211.515
2610002M06Rik	360.89	372.133	467.771	476.795	587.888	429.846	0.296287	0.0459164	0.113396	400.265	498.176
2610005L07Rik	109.36	55.8199	74.5722	83.3062	83.69	70.9074	0.00437284	0.984194	0.991136	79.9175	79.3012
2610008E11Rik	422.131	332.852	401.673	573.395	547.415	435.225	0.416768	0.000457101	0.00268996	385.552	518.678
2610015P09Rik	148.73	111.64	138.975	137.367	154.346	138.392	0.107205	0.540638	0.691041	133.115	143.368
2610016A17Rik	21.8721	12.4044	18.6431	33.677	18.5216	29.83	0.622353	0.160628	0.294835	17.6399	27.3429
2610020C07Rik	52.493	26.8763	30.5068	37.2219	49.3908	30.808	0.116709	0.733935	0.837303	36.6254	39.1403
2610020H08Rik	129.045	97.168	110.163	133.822	152.974	125.677	0.293544	0.103431	0.211748	112.126	137.491
2610027K06Rik	17.4977	6.20222	11.8638	11.5211	13.0337	2.9341	-0.462942	0.520039	0.672362	11.8546	9.16295
2610035D17Rik	74.3651	109.572	59.3188	100.145	80.9461	87.0449	0.150129	0.609933	0.747109	81.0855	89.3786
2610037D02Rik	10.936	4.13481	5.08447	2.65871	4.1159	4.89016	-0.628509	0.411233	0.576196	6.71844	3.88826
2610042L04Rik	0	0	1.69482	0	1.37197	2.44508	0.897339	0.577365	NA	0.564941	1.27235
2610044O15Rik8	194.662	124.044	135.586	199.403	213.341	147.683	0.30093	0.0900671	0.191211	151.431	186.809
2610100L16Rik	4.37442	0	1.69482	1.77247	1.37197	0.978033	-0.42624	0.775914	NA	2.02308	1.37416
2610203C22Rik	39.3698	35.1459	18.6431	41.6531	41.845	24.4508	0.208853	0.521981	0.674075	31.0529	35.983
2610206C17Rik	8.74884	2.06741	1.69482	5.31742	4.80188	3.42312	0.18694	0.833626	NA	4.17036	4.51414
2610301B20Rik	107.173	93.0332	113.553	120.528	168.752	116.875	0.357137	0.0720205	0.16116	104.587	135.385
2610305D13Rik	102.799	72.3592	86.436	75.3301	92.6078	56.2369	-0.244226	0.263419	0.421653	87.198	74.7249
2610306M01Rik	21.8721	35.1459	32.2016	31.9045	23.3234	25.9179	-0.134844	0.691134	0.808396	29.7399	27.0486
2610307P16Rik	179.351	59.9548	162.703	171.044	144.057	117.853	0.126322	0.65728	0.784309	134.003	144.318
2610316D01Rik	4.37442	8.26962	1.69482	1.77247	4.1159	7.33525	-0.0642886	0.938969	0.965254	4.77962	4.40787
2610318N02Rik	2.18721	2.06741	3.38965	0	1.37197	0.489016	-2.0401	0.219733	NA	2.54809	0.620328
2610507B11Rik	4700.31	5542.71	4999.73	6362.29	6271.26	6064.29	0.298603	6.18407e-06	7.11401e-05	5080.92	6232.62
2610507I01Rik	395.885	351.459	259.308	321.704	325.156	317.372	-0.0431232	0.737541	0.839974	335.551	321.411
2610524H06Rik	56.8674	20.6741	42.3706	51.4017	72.0283	44.0115	0.47914	0.0895313	0.190365	39.9707	55.8138
2610528A11Rik	13.1233	8.26962	0	7.97613	9.60377	16.1375	0.831908	0.195626	0.340696	7.13096	11.2391
2610528J11Rik	87.4884	121.977	64.4033	69.1265	87.1199	69.4403	-0.255932	0.229783	0.383101	91.2895	75.2289
2700029M09Rik	166.228	190.201	222.022	257.009	307.321	255.267	0.494626	0.0028194	0.0121707	192.817	273.199
2700038G22Rik	56.8674	49.6177	40.6757	49.6293	43.217	56.2369	0.0352938	0.892725	0.939438	49.0536	49.6944
2700046A07Rik	2.18721	0	3.38965	1.77247	5.48787	1.95607	0.66644	0.569339	NA	1.85895	3.07214
2700046G09Rik	32.8081	12.4044	33.8965	33.677	28.8113	32.7641	0.252499	0.470107	0.630039	26.3697	31.7508
2700049A03Rik	343.392	305.976	281.341	340.315	391.011	317.861	0.173387	0.155152	0.28727	310.236	349.729
2700054A10Rik	37.1826	28.9437	42.3706	36.3357	47.3329	34.7202	0.10878	0.715549	0.825419	36.1656	39.4629
2700060E02Rik	1419.5	1209.43	1333.83	1110.45	1457.03	1175.11	-0.0886384	0.431157	0.595281	1320.92	1247.53
2700062C07Rik	122.484	138.516	115.248	132.936	147.486	124.21	0.106547	0.549652	0.697544	125.416	134.877
2700081O15Rik	216.534	252.223	213.548	219.787	168.066	235.217	-0.132679	0.368073	0.532184	227.435	207.69
2700094K13Rik	83.114	86.831	123.722	54.0604	67.9124	75.7976	-0.565952	0.0113821	0.0373623	97.889	65.9235
2700097O09Rik	56.8674	70.2918	71.1826	70.8989	72.0283	52.8138	-0.059585	0.806613	0.886341	66.1139	65.247
2700099C18Rik	80.9267	26.8763	27.1172	56.7191	47.3329	42.5444	0.207876	0.534448	0.685595	44.9734	48.8655
2810001G20Rik	63.4291	86.831	64.4033	59.3779	61.7385	44.0115	-0.396094	0.106647	0.216886	71.5545	55.0426
2810002D19Rik	52.493	64.0896	47.455	50.5155	50.7628	50.3687	-0.108627	0.664319	0.78936	54.6792	50.549
2810004N23Rik	286.524	419.683	303.373	322.59	286.741	355.026	-0.0569434	0.68507	0.804237	336.527	321.452
2810006K23Rik	43.7442	70.2918	59.3188	67.354	59.6806	57.7039	0.0766863	0.738635	0.840561	57.7849	61.5795
2810013P06Rik	209.972	111.64	108.469	151.546	176.984	148.661	0.185964	0.323738	0.487558	143.36	159.064
2810021J22Rik	96.2372	105.438	111.858	113.438	102.898	97.8033	-0.00561156	0.977106	0.986628	104.511	104.713
2810025M15Rik	72.1779	78.5614	74.5722	63.809	65.1684	67.4843	-0.194398	0.335454	0.499098	75.1038	65.4873
2810029C07Rik	6.56163	6.20222	5.08447	2.65871	7.54582	4.89016	-0.207603	0.771034	0.86302	5.94944	5.03156
2810032G03Rik	104.986	95.1006	59.3188	69.1265	92.6078	46.9456	-0.328705	0.135429	0.259039	86.4685	69.5599
2810047C21Rik1	2.18721	6.20222	1.69482	2.65871	1.37197	8.31328	0.248543	0.801111	0.88272	3.36142	4.11465
2810403A07Rik	1071.73	961.343	860.97	1176.92	1198.41	1214.23	0.316754	0.000583689	0.00328445	964.682	1196.52
2810403D21Rik	59.0547	31.0111	22.0327	39.8807	52.1347	31.7861	0.180958	0.66206	0.787534	37.3661	41.2672
2810408A11Rik	37.1826	41.3481	50.8447	53.1742	50.0768	89.001	0.580068	0.0213884	0.0624641	43.1251	64.084
2810408I11Rik	19.6849	28.9437	6.77929	15.066	9.60377	7.33525	-0.78154	0.0990716	0.204945	18.4693	10.6683
2810410L24Rik	54.6802	20.6741	20.3379	21.2697	22.6375	34.7202	-0.197747	0.573277	0.717924	31.8974	26.2091
2810417H13Rik	164.041	183.999	264.392	194.972	283.997	284.119	0.324359	0.105477	0.214993	204.144	254.363
2810428I15Rik	78.7395	109.572	96.6049	25.7009	21.2655	33.7421	-1.81129	1.59877e-10	8.36453e-09	94.9723	26.9028
2810429I04Rik	6.56163	6.20222	6.77929	6.20366	7.54582	5.37918	-0.0493388	0.940246	0.965592	6.51438	6.37622
2810433D01Rik	15.3105	8.26962	11.8638	5.31742	6.85984	4.89016	-1.03699	0.0869655	0.185948	11.8146	5.68914
2810442N19Rik	17.4977	12.4044	11.8638	6.20366	16.4636	6.84623	-0.528843	0.371815	0.53597	13.922	9.83783
2810454H06Rik	37.1826	26.8763	28.812	33.677	29.4973	34.7202	0.0874621	0.786345	0.872994	30.9569	32.6315
2810459M11Rik	89.6756	97.168	132.196	100.145	121.419	96.3363	-0.0140628	0.952085	0.972129	106.347	105.967
2810468N07Rik	21.8721	39.2807	40.6757	11.5211	14.4057	18.5826	-1.18248	0.00643037	0.0235523	33.9428	14.8365
2810474O19Rik	1332.01	1013.03	1103.33	1994.92	1697.81	1645.05	0.634855	3.04086e-07	5.40806e-06	1149.46	1779.26
2900005J15Rik	26.2465	26.8763	23.7275	24.8146	22.6375	31.2971	0.0472499	0.889683	0.937228	25.6168	26.2497
2900008C10Rik	6.56163	0	1.69482	2.65871	3.42992	6.84623	0.761497	0.440381	NA	2.75215	4.31162
2900009J06Rik	0	0	1.69482	0.886237	0.685984	2.44508	0.789591	0.643118	NA	0.564941	1.3391
2900011O08Rik	4.37442	0	3.38965	0.886237	2.05795	0.489016	-1.21747	0.360413	NA	2.58802	1.1444
2900026A02Rik	472.437	479.638	520.311	663.791	526.149	634.743	0.306346	0.00616016	0.0227481	490.795	608.228
2900041M22Rik	4.37442	0	3.38965	2.65871	2.05795	3.42312	0.158494	0.885525	NA	2.58802	2.71326
2900052N01Rik	0	0	0	1.77247	3.42992	3.42312	3.01294	0.0299695	NA	0	2.87517
2900057B20Rik	15.3105	2.06741	1.69482	7.97613	4.1159	3.91213	0.0658073	0.935172	0.963337	6.35756	5.33472
2900060B14Rik	32.8081	14.4718	10.1689	26.5871	25.3814	14.1815	0.253552	0.54942	0.697307	19.1496	22.05
2900076A07Rik	85.3012	43.4155	55.9292	71.7852	63.7965	66.0172	0.143397	0.591673	0.73208	61.5486	67.1996
2900097C17Rik	1706.02	2100.48	1764.31	2485.89	2400.94	2252.41	0.356647	0.00134548	0.00661356	1856.94	2379.75
3000002C10Rik	30.6209	26.8763	23.7275	31.0183	39.787	41.5664	0.493573	0.14017	0.265952	27.0749	37.4572
3010001F23Rik	4.37442	4.13481	5.08447	0.886237	1.37197	2.44508	-1.4705	0.123083	NA	4.53123	1.56776
3010026O09Rik	39.3698	35.1459	35.5913	46.9705	36.3571	40.5884	0.164736	0.573802	0.718405	36.7023	41.3053
3110001I22Rik	107.173	70.2918	44.0654	77.1026	70.6563	66.5062	0.0130278	0.957174	0.974971	73.8435	71.4217
3110002H16Rik	304.022	370.066	354.218	339.429	278.509	337.421	-0.105642	0.383431	0.547958	342.769	318.453
3110009E18Rik	15.3105	18.6066	11.8638	15.066	15.0916	20.5387	0.18119	0.672017	0.794798	15.2603	16.8988
3110021A11Rik	4.37442	4.13481	3.38965	9.7486	3.42992	7.82426	0.824765	0.305998	0.468879	3.96629	7.00093
3110021N24Rik	41.557	43.4155	38.9809	46.9705	42.531	47.9236	0.153013	0.564786	0.711373	41.3178	45.8084
3110035E14Rik	21.8721	6.20222	18.6431	17.7247	17.1496	13.2034	0.0215136	0.966588	0.980125	15.5725	16.0259
3110039I08Rik	345.579	177.797	183.041	215.356	243.524	128.611	-0.256623	0.158932	0.292637	235.472	195.83
3110040N11Rik	150.917	119.91	116.943	87.7374	106.327	91.9351	-0.428702	0.0158369	0.0490454	129.257	95.3333
3110043O21Rik	312.771	221.212	262.698	395.262	366.315	380.944	0.52487	0.000459646	0.00269973	265.56	380.84
3110045C21Rik	10.936	2.06741	8.47411	14.1798	10.2898	7.33525	0.536004	0.377749	0.541662	7.15919	10.6016
3110052M02Rik	150.917	95.1006	135.586	154.205	142.685	120.787	0.119946	0.508199	0.662097	127.201	139.226
3110056K07Rik	164.041	99.2355	88.1308	119.642	126.221	119.32	0.0985597	0.613723	0.750187	117.136	121.728
3110057O12Rik	124.671	93.0332	111.858	140.025	178.356	91.4461	0.272319	0.200598	0.346746	109.854	136.609
3110062M04Rik	59.0547	45.4829	32.2016	37.2219	27.4393	41.0774	-0.347867	0.250337	0.406694	45.5797	35.2462
3110070M22Rik	4.37442	2.06741	1.69482	1.77247	2.74393	1.46705	-0.415396	0.70963	NA	2.71222	1.99449
3110079O15Rik	2.18721	2.06741	6.77929	0	0	1.46705	-2.95792	0.0899752	NA	3.67797	0.489016
3110082I17Rik	69.9907	57.8873	35.5913	35.4495	34.2992	49.3907	-0.400157	0.206561	0.354167	54.4898	39.7131
3200001D21Rik	15.3105	14.4718	10.1689	23.0422	16.4636	11.7364	0.337793	0.493448	0.650117	13.3171	17.0807
3300002I08Rik	17.4977	14.4718	23.7275	23.0422	24.0094	13.2034	0.0696874	0.879551	0.931049	18.5657	20.085
3300005D01Rik	0	4.13481	1.69482	0.886237	1.37197	0.978033	-0.726541	0.581375	NA	1.94321	1.07875
3425401B19Rik	0	68.2244	83.0463	14.1798	0	2.9341	-0.808046	0.726757	0.832235	50.4236	5.70463
3632451O06Rik	43.7442	45.4829	28.812	22.1559	23.3234	38.1433	-0.473155	0.147522	0.27639	39.3464	27.8742
3632454L22Rik	19.6849	10.337	16.9482	19.4972	32.9272	12.2254	0.394374	0.425197	0.589717	15.6567	21.5499
3830403N18Rik	0	0	0	0.886237	0.685984	0	0.305626	0.869823	NA	0	0.524073
3830406C13Rik	308.397	301.841	294.899	432.484	488.42	371.653	0.505794	0.000250035	0.00162613	301.712	430.852
3830408C21Rik	10.936	4.13481	5.08447	11.5211	13.0337	8.31328	0.732487	0.248767	0.405165	6.71844	10.956
3830417A13Rik	2.18721	0	0	0.886237	1.37197	1.46705	0.912084	0.56565	NA	0.72907	1.24175
3830432H09Rik	4.37442	0	5.08447	7.97613	2.74393	6.84623	0.828187	0.376631	0.540719	3.15296	5.85543
3930402G23Rik	6.56163	4.13481	8.47411	9.7486	8.2318	5.37918	0.254559	0.727705	0.83287	6.39018	7.78653
4430402I18Rik	17.4977	10.337	8.47411	17.7247	13.0337	12.2254	0.277434	0.582787	0.725027	12.1029	14.3279
4631405J19Rik	15.3105	12.4044	15.2534	9.7486	10.2898	15.1595	-0.26192	0.582602	0.725026	14.3228	11.7326
4632404H12Rik	89.6756	53.7525	64.4033	82.42	91.9218	70.9074	0.239387	0.289829	0.451347	69.2771	81.7497
4632415L05Rik	253.716	239.819	232.191	294.231	257.244	272.382	0.185059	0.190455	0.33375	241.909	274.619
4632427E13Rik	111.548	68.2244	81.3515	97.486	74.7722	89.979	0.014691	0.946702	0.969614	87.0412	87.4124
4632428C04Rik	4.37442	10.337	11.8638	4.43118	5.48787	3.91213	-0.97401	0.150709	0.280847	8.8584	4.61039
4632428N05Rik	505.245	647.098	444.044	449.322	415.706	403.928	-0.338331	0.0342253	0.0904602	532.129	422.985
4732416N19Rik	4.37442	0	5.08447	0	3.42992	2.9341	-0.518117	0.676719	NA	3.15296	2.12134
4732471J01Rik	45.9314	28.9437	45.7602	54.0604	58.9946	52.8138	0.453375	0.136667	0.260723	40.2118	55.2896
4732490B19Rik	54.6802	26.8763	20.3379	40.7669	50.0768	36.6762	0.395545	0.231349	0.385071	33.9648	42.5066
4732491K20Rik	24.0593	18.6066	13.5586	28.3596	21.2655	18.5826	0.280252	0.48992	0.647281	18.7415	22.7359
4831440E17Rik	91.8628	62.0222	49.1499	80.6475	70.6563	57.2149	0.051449	0.826585	0.899604	67.6783	69.5063
4833411C07Rik	10.936	12.4044	5.08447	4.43118	6.85984	5.8682	-0.67543	0.277071	0.436958	9.47498	5.71974
4833417C18Rik	13.1233	0	10.1689	5.31742	8.91779	5.37918	-0.229576	0.733462	0.837138	7.76406	6.53813
4833418N02Rik	26.2465	43.4155	30.5068	31.0183	37.0431	39.6103	0.126464	0.681614	0.801618	33.3896	35.8906
4833419F23Rik	10.936	4.13481	8.47411	7.97613	7.54582	11.2474	0.179935	0.787272	0.873576	7.84832	8.92311
4833420G17Rik	551.177	576.806	435.569	406.783	769.673	681.2	0.25214	0.22179	0.373118	521.184	619.219
4833422C13Rik	48.1186	24.8089	16.9482	29.2458	32.2412	9.29131	-0.375729	0.393646	0.558689	29.9586	23.5928
4833422M21Rik	4.37442	0	0	1.77247	0.685984	1.46705	0.260421	0.869956	NA	1.45814	1.3085
4833423E24Rik	0	0	1.69482	0.886237	1.37197	2.44508	1.13422	0.53746	NA	0.564941	1.56776
4833427F10Rik	2.18721	0	0	1.77247	2.74393	6.35721	2.3871	0.0993429	NA	0.72907	3.62454
4833439L19Rik	839.888	946.872	989.777	1012.08	1107.86	1032.8	0.181383	0.0611265	0.142092	925.512	1050.92
4921504A21Rik	4.37442	0	1.69482	0	3.42992	1.46705	-0.0879736	0.943344	NA	2.02308	1.63232
4921506M07Rik	2.18721	0	1.69482	4.43118	4.1159	2.9341	1.62991	0.195259	NA	1.29401	3.82706
4921507L20Rik	34.9953	4.13481	20.3379	17.7247	20.5795	11.7364	-0.205731	0.658423	0.784918	19.8227	16.6802
4921507P07Rik	32.8081	16.5392	25.4223	24.8146	41.845	26.8959	0.327045	0.405548	0.570335	24.9232	31.1852
4921511C10Rik	67.8035	10.337	32.2016	29.2458	28.1253	14.6705	-0.54315	0.19299	0.33695	36.7807	24.0139
4921511H03Rik	24.0593	8.26962	16.9482	17.7247	10.9757	5.8682	-0.51913	0.448686	0.611307	16.4257	11.5229
4921511I17Rik	13.1233	10.337	8.47411	13.2936	10.9757	6.35721	-0.0918754	0.886948	0.935702	10.6448	10.2088
4921513I03Rik	13.1233	0	3.38965	3.54495	6.85984	3.91213	0.0633906	0.946863	NA	5.5043	4.7723
4921518K17Rik	2.18721	2.06741	5.08447	1.77247	1.37197	0	-1.54683	0.320728	NA	3.11303	1.04815
4921524J17Rik	113.735	128.179	135.586	189.655	185.216	194.629	0.588494	0.000432929	0.00257048	125.833	189.833
4921531C22Rik	61.2419	49.6177	61.0136	61.1503	58.3086	60.638	0.0649188	0.795646	0.878829	57.2911	60.0323
4921536K21Rik	4.37442	0	8.47411	13.2936	8.2318	8.8023	1.13724	0.112533	0.22573	4.28284	10.1092
4930402H24Rik	616.793	463.099	469.466	651.384	659.23	554.545	0.270441	0.0103095	0.0344635	516.453	621.72
4930404H11Rik	4.37442	0	0	0.886237	2.05795	1.46705	0.544645	0.756575	NA	1.45814	1.47041
4930404I05Rik	15.3105	10.337	18.6431	10.6348	19.2075	10.7584	-0.154117	0.7541	0.851894	14.7635	13.5336
4930404N11Rik	133.42	150.921	113.553	47.8568	34.2992	39.6103	-1.70857	6.29606e-10	2.63388e-08	132.631	40.5888
4930405A10Rik	8.74884	4.13481	3.38965	7.08989	10.9757	2.9341	0.325228	0.684037	0.803601	5.42443	6.99991
4930405A21Rik	6.56163	10.337	3.38965	8.86237	0.685984	3.42312	-0.70836	0.390902	0.555621	6.76277	4.32382
4930405J17Rik	67.8035	24.8089	15.2534	28.3596	30.8693	14.6705	-0.420166	0.341441	0.505423	35.9553	24.6331
4930405O22Rik	96.2372	26.8763	25.4223	54.9467	63.1105	20.5387	-0.0241756	0.945964	0.969054	49.5119	46.1986
4930406D18Rik	0	2.06741	5.08447	0.886237	4.1159	0.489016	-0.621903	0.662459	NA	2.38396	1.83038
4930412C18Rik	24.0593	22.7415	10.1689	27.4733	34.2992	21.5167	0.567673	0.140598	0.266624	18.9899	27.7631
4930412O13Rik	273.401	190.201	191.515	184.337	200.307	189.738	-0.175919	0.294541	0.456267	218.372	191.461
4930413F20Rik	28.4337	8.26962	11.8638	14.1798	12.3477	11.7364	-0.307807	0.535108	0.686056	16.189	12.7546
4930413G21Rik	10.936	8.26962	3.38965	0.886237	0.685984	0.489016	-3.47217	0.00303121	0.0129164	7.53177	0.687079
4930414N06Rik	6.56163	2.06741	8.47411	5.31742	6.85984	1.95607	-0.401962	0.619176	0.75492	5.70105	4.71111
4930415F15Rik	6.56163	0	3.38965	2.65871	3.42992	1.95607	-0.291954	0.761928	NA	3.31709	2.68156
4930415O20Rik	8.74884	8.26962	8.47411	8.86237	14.4057	12.2254	0.498625	0.374089	0.538233	8.49752	11.8311
4930426L09Rik	2.18721	2.06741	0	0	1.37197	2.9341	0.135286	0.92597	NA	1.4182	1.43536
4930427A07Rik	67.8035	90.9658	99.9945	75.3301	67.2264	108.562	-0.0349438	0.86017	0.920419	86.2546	83.7061
4930429B21Rik	0	0	3.38965	0.886237	2.74393	2.44508	0.730596	0.569852	NA	1.12988	2.02508
4930429F24Rik	15.3105	12.4044	22.0327	14.1798	11.6617	9.29131	-0.536118	0.258022	0.415582	16.5825	11.7109
4930430F08Rik	45.9314	47.5503	47.455	57.6054	50.0768	42.5444	0.0689167	0.793523	0.877435	46.9789	50.0755
4930430J02Rik	2.18721	0	1.69482	2.65871	1.37197	1.95607	0.594462	0.691926	NA	1.29401	1.99558
4930431P03Rik	234.031	148.853	155.924	200.289	252.442	121.276	0.0608243	0.769051	0.862107	179.603	191.336
4930432K21Rik	19.6849	22.7415	27.1172	23.0422	17.1496	18.0936	-0.273413	0.484378	0.643185	23.1812	19.4285
4930438E09Rik	4.37442	4.13481	8.47411	4.43118	6.17385	4.89016	-0.141182	0.860357	0.920427	5.66111	5.16507
4930443O20Rik	26.2465	10.337	8.47411	9.7486	13.7197	6.84623	-0.520581	0.326743	0.490869	15.0192	10.1048
4930444F02Rik	2.18721	0	0	3.54495	2.05795	0	1.09062	0.498359	NA	0.72907	1.86763
4930445N18Rik	0	0	0	0.886237	2.05795	0.489016	1.41484	0.428783	NA	0	1.1444
4930447A16Rik	8.74884	2.06741	1.69482	19.4972	6.17385	5.37918	1.36643	0.122755	0.241232	4.17036	10.3501
4930447C04Rik	2.18721	0	1.69482	0	0.685984	1.95607	-0.680119	0.702363	NA	1.29401	0.880683
4930447K03Rik	0	4.13481	1.69482	4.43118	7.54582	5.37918	1.57065	0.118318	0.234867	1.94321	5.78539
4930447M23Rik	0	6.20222	0	0.886237	1.37197	1.46705	-0.664684	0.628838	NA	2.06741	1.24175
4930447N08Rik	2.18721	0	1.69482	1.77247	3.42992	0.489016	0.458366	0.777805	NA	1.29401	1.89714
4930449E18Rik	17.4977	8.26962	5.08447	7.08989	10.2898	4.40115	-0.451035	0.525343	0.676832	10.2839	7.26026
4930451G09Rik	168.415	204.673	155.924	138.253	131.709	127.144	-0.407076	0.00521146	0.0199238	176.337	132.369
4930452B06Rik	17.4977	31.0111	76.267	44.3118	50.7628	79.2207	0.705166	0.122269	0.24052	41.5919	58.0984
4930453N24Rik	308.397	334.92	372.861	360.698	374.547	383.878	0.135905	0.312922	0.476194	338.726	373.041
4930455C13Rik	13.1233	4.13481	10.1689	9.7486	11.6617	10.7584	0.2404	0.690498	0.808205	9.14233	10.7229
4930455G09Rik	6.56163	4.13481	5.08447	5.31742	4.1159	9.29131	0.258689	0.712267	0.823094	5.2603	6.24154
4930455H04Rik	4.37442	4.13481	3.38965	0.886237	4.80188	3.42312	-0.33367	0.738871	NA	3.96629	3.03708
4930471G03Rik	2.18721	2.06741	1.69482	1.77247	2.05795	0	-0.93456	0.487755	NA	1.98315	1.27681
4930473A02Rik	10.936	12.4044	11.8638	13.2936	11.6617	10.7584	0.00243162	0.996092	0.997781	11.7347	11.9045
4930474M22Rik	0	6.20222	1.69482	3.54495	4.80188	1.95607	0.351202	0.75227	NA	2.63235	3.4343
4930478L05Rik	17.4977	12.4044	22.0327	18.611	15.0916	13.6925	-0.153867	0.745052	0.845126	17.3116	15.7984
4930479D17Rik	2.18721	2.06741	1.69482	0.886237	2.74393	2.44508	0.075746	0.956003	NA	1.98315	2.02508
4930480G23Rik	4.37442	0	6.77929	9.7486	5.48787	4.89016	0.756127	0.375927	0.53981	3.7179	6.70888
4930480K23Rik	72.1779	51.6851	47.455	54.9467	62.4245	48.4126	-0.0380448	0.8723	0.927399	57.106	55.2613
4930481A15Rik	78.7395	59.9548	62.7084	36.3357	41.845	48.4126	-0.65871	0.0306592	0.0833567	67.1342	42.1978
4930483K19Rik	2.18721	4.13481	10.1689	1.77247	0.685984	0	-2.89751	0.0208608	NA	5.49699	0.819486
4930483O08Rik	4.37442	2.06741	1.69482	0.886237	4.80188	0.978033	-0.327579	0.79039	NA	2.71222	2.22205
4930486L24Rik	4.37442	14.4718	3.38965	3.54495	8.91779	8.8023	0.0115642	0.985505	0.991992	7.41197	7.08834
4930487D11Rik	2.18721	2.06741	0	0	2.05795	0.489016	-0.670526	0.667153	NA	1.4182	0.848989
4930487H11Rik	21.8721	4.13481	5.08447	7.08989	15.7776	7.82426	0.169286	0.781131	0.86984	10.3638	10.2306
4930502E09Rik	13.1233	2.06741	1.69482	5.31742	5.48787	3.91213	0.187184	0.817089	0.893598	5.62849	4.90581
4930503B20Rik	6.56163	2.06741	3.38965	2.65871	2.74393	4.40115	-0.37158	0.748747	NA	4.00623	3.26793
4930503L19Rik	91.8628	82.6962	86.436	69.1265	63.1105	55.7479	-0.486724	0.0184426	0.0553858	86.9983	62.6616
4930505A04Rik	0	0	3.38965	1.77247	0.685984	0.489016	-0.248879	0.884969	NA	1.12988	0.982491
4930506A18Rik	0	2.06741	0	0.886237	2.05795	0	0.258695	0.885703	NA	0.689135	0.981396
4930506C21Rik	28.4337	12.4044	8.47411	15.9523	27.4393	19.0716	0.441841	0.333848	0.497612	16.4374	20.8211
4930507D05Rik	10.936	8.26962	1.69482	6.20366	11.6617	4.40115	0.130564	0.846374	0.912109	6.96683	7.42217
4930509E16Rik	2.18721	4.13481	5.08447	2.65871	1.37197	0.978033	-1.27457	0.231884	NA	3.80216	1.66957
4930511A08Rik	17.4977	8.26962	16.9482	23.0422	15.0916	6.35721	-0.0248548	0.963051	0.978422	14.2385	14.8303
4930511E03Rik	0	0	0	1.77247	2.05795	2.44508	2.5307	0.13281	NA	0	2.09184
4930511M06Rik	6.56163	2.06741	1.69482	2.65871	4.1159	2.44508	-0.0419915	0.96577	NA	3.44129	3.07323
4930512B01Rik	65.6163	24.8089	32.2016	37.2219	45.9609	25.4289	-0.15042	0.666284	0.79065	40.8756	36.2039
4930512J16Rik	6.56163	4.13481	0	0.886237	5.48787	1.46705	-0.323529	0.760322	NA	3.56548	2.61372
4930513N10Rik	13.1233	12.4044	3.38965	10.6348	13.7197	11.7364	0.378576	0.498835	0.654081	9.63911	12.0303
4930515G01Rik	13.1233	10.337	23.7275	13.2936	13.0337	12.2254	-0.326456	0.472903	0.632598	15.7293	12.8509
4930520O04Rik	19.6849	20.6741	37.2861	28.3596	18.5216	44.9895	0.226201	0.492615	0.649269	25.8817	30.6235
4930521E06Rik	21.8721	12.4044	8.47411	16.8385	15.7776	6.35721	-0.146859	0.797719	0.880292	14.2502	12.9911
4930523C07Rik	139.981	146.786	142.365	164.84	178.356	135.458	0.140986	0.419738	0.584474	143.044	159.551
4930525D18Rik	2.18721	0	3.38965	0.886237	1.37197	0.978033	-0.810951	0.552333	NA	1.85895	1.07875
4930525G20Rik	45.9314	31.0111	30.5068	24.8146	37.7291	27.8739	-0.231894	0.490468	0.647781	35.8164	30.1392
4930526I15Rik	8.74884	26.8763	23.7275	3.54495	5.48787	9.29131	-1.63708	0.00198568	0.00911514	19.7842	6.10804
4930527F14Rik	0	2.06741	1.69482	1.77247	0.685984	1.46705	0.0723776	0.96251	NA	1.25408	1.3085
4930528A17Rik	6.56163	6.20222	0	0.886237	2.05795	1.46705	-1.34468	0.27275	NA	4.25461	1.47041
4930532I03Rik	6.56163	0	1.69482	2.65871	0	1.46705	-0.757068	0.600346	NA	2.75215	1.37525
4930533B01Rik	30.6209	12.4044	8.47411	14.1798	19.8935	6.84623	-0.299391	0.549266	0.697228	17.1665	13.6398
4930538K18Rik	0	0	0	2.65871	2.74393	2.44508	2.85111	0.0669211	NA	0	2.61591
4930539E08Rik	21.8721	8.26962	15.2534	28.3596	43.217	50.8577	1.43085	0.00456197	0.017916	15.1317	40.8114
4930539J05Rik	13.1233	20.6741	6.77929	12.4073	15.0916	7.82426	-0.220534	0.678131	0.79869	13.5255	11.7744
4930545L23Rik	19.6849	6.20222	10.1689	7.97613	17.8356	8.31328	-0.0299091	0.956877	0.974873	12.0187	11.375
4930546C10Rik	0	2.06741	6.77929	0	0	0	-4.28136	0.0160013	NA	2.9489	0
4930546K05Rik	0	0	1.69482	0.886237	0.685984	0.489016	-0.0641238	0.972152	NA	0.564941	0.687079
4930547E08Rik	0	0	0	0.886237	2.74393	1.95607	2.37605	0.165026	NA	0	1.86208
4930548H24Rik	2.18721	0	0	0.886237	0.685984	1.95607	0.739282	0.652964	NA	0.72907	1.1761
4930549C15Rik	30.6209	12.4044	22.0327	15.066	15.0916	11.2474	-0.64056	0.125142	0.244756	21.686	13.8017
4930549G23Rik	10.936	18.6066	8.47411	8.86237	10.2898	9.78033	-0.373852	0.489576	0.64705	12.6723	9.64415
4930550C14Rik	4.37442	6.20222	3.38965	0	5.48787	2.44508	-0.795205	0.391955	0.556755	4.65543	2.64432
4930552P12Rik	2.18721	0	6.77929	3.54495	2.05795	0.489016	-0.666427	0.566562	NA	2.98883	2.03064
4930554I06Rik	4.37442	10.337	1.69482	7.97613	7.54582	3.42312	0.29655	0.777439	NA	5.46876	6.31502
4930556M19Rik	41.557	24.8089	22.0327	38.9944	54.8787	34.7202	0.560322	0.0635743	0.146666	29.4662	42.8644
4930556N13Rik	50.3058	18.6066	18.6431	35.4495	29.4973	22.4948	0.0662856	0.863675	0.922305	29.1852	29.1472
4930557K07Rik	13.1233	18.6066	13.5586	8.86237	13.0337	9.78033	-0.509308	0.285645	0.446973	15.0962	10.5588
4930558J18Rik	0	2.06741	0	3.54495	0.685984	2.9341	1.64413	0.270494	NA	0.689135	2.38834
4930562C15Rik	48.1186	14.4718	20.3379	30.132	24.0094	15.6485	-0.204331	0.655036	0.782652	27.6428	23.2633
4930562F07Rik	8.74884	6.20222	3.38965	3.54495	2.74393	1.95607	-1.152	0.195746	NA	6.11357	2.74832
4930563D23Rik	2.18721	2.06741	1.69482	1.77247	1.37197	0.489016	-0.813354	0.539004	NA	1.98315	1.21115
4930563E18Rik	0	0	0	1.77247	1.37197	0.978033	1.89172	0.314426	NA	0	1.37416
4930563E22Rik	10.936	6.20222	6.77929	13.2936	9.60377	12.2254	0.560322	0.355667	0.519955	7.97252	11.7076
4930563F08Rik	61.2419	12.4044	23.7275	42.5394	47.3329	13.2034	0.108758	0.801612	0.882878	32.4579	34.3586
4930563M21Rik	10.936	0	1.69482	9.7486	6.85984	2.44508	0.899618	0.342845	NA	4.21029	6.35117
4930564C03Rik	4.37442	4.13481	1.69482	2.65871	1.37197	2.44508	-0.665158	0.544554	NA	3.40135	2.15859
4930565N06Rik	126.858	55.8199	103.384	139.139	156.404	86.5559	0.397314	0.144848	0.272447	95.3541	127.366
4930570G19Rik	0	4.13481	3.38965	5.31742	4.1159	1.95607	0.493125	0.63223	NA	2.50815	3.79646
4930572O03Rik	2.18721	0	0	0.886237	2.05795	0.489016	0.538429	0.770227	NA	0.72907	1.1444
4930577N17Rik	21.8721	10.337	16.9482	28.3596	28.8113	21.0277	0.658625	0.141838	0.268409	16.3858	26.0662
4930578C19Rik	34.9953	41.3481	30.5068	35.4495	32.9272	32.7641	-0.0770793	0.801793	0.882878	35.6168	33.7136
4930578M01Rik	10.936	2.06741	8.47411	2.65871	4.1159	7.82426	-0.54703	0.495554	0.651545	7.15919	4.86629
4930579G18Rik	89.6756	57.8873	55.9292	82.42	66.5404	71.3964	0.131213	0.584651	0.726509	67.8307	73.4523
4930579G24Rik	13.1233	16.5392	27.1172	29.2458	28.1253	33.2531	0.649519	0.0802658	0.174601	18.9266	30.2081
4930579H20Rik	13.1233	4.13481	8.47411	17.7247	6.17385	5.8682	0.200468	0.776923	0.866607	8.57739	9.92226
4930579K19Rik	2.18721	0	5.08447	3.54495	4.80188	3.91213	0.678279	0.4679	0.628074	2.42389	4.08632
4930579P08Rik	4.37442	6.20222	5.08447	1.77247	0.685984	1.95607	-1.81626	0.0729679	NA	5.22037	1.47151
4930581F22Rik	59.0547	57.8873	42.3706	49.6293	48.0188	40.5884	-0.202221	0.441473	0.605358	53.1042	46.0788
4930583K01Rik	0	0	0	0	0	0.978033	-0.0976635	0.962794	NA	0	0.326011
4930590J08Rik	6.56163	2.06741	6.77929	3.54495	5.48787	1.46705	-0.711177	0.45788	NA	5.13611	3.49995
4930592I03Rik	50.3058	26.8763	40.6757	57.6054	39.787	31.2971	0.111067	0.758289	0.855315	39.2859	42.8965
4930593A02Rik	4.37442	2.06741	0	1.77247	0	1.46705	-0.928362	0.510775	NA	2.14727	1.07984
4930594C11Rik	72.1779	33.0785	25.4223	52.288	56.2506	30.319	0.128937	0.687675	0.805954	43.5596	46.2859
4930595D18Rik	15.3105	4.13481	8.47411	15.066	6.85984	7.33525	0.0827336	0.906627	0.94724	9.30646	9.7537
4930596I21Rik	17.4977	16.5392	10.1689	22.1559	15.7776	8.8023	0.0423939	0.939143	0.965367	14.7353	15.5786
4930599N23Rik	4.37442	2.06741	1.69482	9.7486	15.0916	3.91213	1.82695	0.039687	0.101848	2.71222	9.58412
4931402G19Rik	8.74884	4.13481	6.77929	5.31742	7.54582	3.42312	-0.308579	0.690571	NA	6.55431	5.42878
4931403E22Rik	10.936	6.20222	5.08447	11.5211	13.7197	5.8682	0.466876	0.466858	0.627226	7.40758	10.3696
4931403G20Rik	56.8674	33.0785	38.9809	31.9045	47.3329	34.7202	-0.160843	0.639502	0.769932	42.9756	37.9859
4931406C07Rik	645.227	727.727	920.289	836.607	1116.1	678.266	0.200368	0.285742	0.447033	764.414	876.989
4931406H21Rik	249.342	80.6288	110.163	141.798	136.511	79.2207	-0.230409	0.394516	0.559248	146.711	119.176
4931406P16Rik	907.692	872.445	745.722	942.07	946.657	788.295	0.0815783	0.409438	0.574326	841.953	892.34
4931408D14Rik	21.8721	31.0111	20.3379	31.0183	32.9272	25.4289	0.275028	0.431235	0.595293	24.407	29.7915
4931414P19Rik	63.4291	66.157	77.9619	51.4017	51.4488	52.8138	-0.421675	0.0545539	0.129958	69.1826	51.8881
4931423N10Rik	0	0	1.69482	0	1.37197	1.95607	0.616499	0.761592	NA	0.564941	1.10934
4931428F04Rik	65.6163	43.4155	62.7084	60.2641	43.9029	50.3687	-0.165937	0.522882	0.675011	57.2467	51.5119
4931429I11Rik	2.18721	2.06741	1.69482	1.77247	0.685984	0.978033	-0.829563	0.589054	NA	1.98315	1.1455
4931429P17Rik	0	0	0	0	0.685984	0	-0.628546	0.825441	NA	0	0.228661
4931430N09Rik	21.8721	4.13481	15.2534	16.8385	17.8356	2.44508	-0.2994	0.634181	0.766304	13.7534	12.3731
4931431C16Rik	6.56163	2.06741	1.69482	7.97613	8.2318	6.35721	1.1927	0.143531	0.270573	3.44129	7.52172
4931440F15Rik	2.18721	0	3.38965	0.886237	1.37197	0.978033	-0.801961	0.581034	NA	1.85895	1.07875
4931440P22Rik	0	0	0	1.77247	0	3.42312	2.04276	0.246769	NA	0	1.73186
4932413F04Rik	10.936	0	1.69482	4.43118	0.685984	1.46705	-0.399098	0.78351	NA	4.21029	2.19474
4932416H05Rik	41.557	51.6851	32.2016	45.1981	50.7628	34.2312	0.041438	0.877165	0.929554	41.8146	43.3973
4932418E24Rik	172.79	76.494	94.9101	54.9467	56.9366	50.3687	-1.04867	5.28888e-05	0.000434867	114.731	54.084
4932435O22Rik	0	6.20222	1.69482	1.77247	0.685984	0.489016	-1.45298	0.254409	NA	2.63235	0.982491
4932438A13Rik	2998.66	2677.29	2557.49	3742.58	4305.92	2509.14	0.32973	0.00239428	0.0106144	2744.48	3519.21
4932438H23Rik	6.56163	6.20222	5.08447	7.08989	4.80188	2.44508	-0.392274	0.635119	0.767134	5.94944	4.77895
4932441J04Rik	2.18721	6.20222	1.69482	0.886237	0.685984	0.489016	-2.32178	0.0942666	NA	3.36142	0.687079
4933400A11Rik	13.1233	0	3.38965	5.31742	8.91779	1.46705	0.014574	0.986669	0.992516	5.5043	5.23409
4933400F21Rik	150.917	53.7525	91.5204	106.348	108.385	67.4843	-0.0514769	0.825648	0.899186	98.7301	94.0727
4933401H06Rik	24.0593	10.337	10.1689	10.6348	13.0337	6.35721	-0.550813	0.315368	0.478571	14.8551	10.0086
4933402D24Rik	10.936	2.06741	3.38965	4.43118	4.80188	3.42312	-0.260635	0.744488	0.844737	5.46437	4.21873
4933404O12Rik	37.1826	37.2133	28.812	30.132	26.0674	27.8739	-0.291018	0.346298	0.51031	34.4026	28.0245
4933405D12Rik	0	0	0	0.886237	3.42992	3.42312	2.87381	0.0773108	NA	0	2.57976
4933405L10Rik	2.18721	2.06741	1.69482	0	0.685984	0.978033	-1.63588	0.29616	NA	1.98315	0.554672
4933406C10Rik	17.4977	4.13481	8.47411	7.08989	11.6617	11.7364	0.122387	0.830448	0.901688	10.0355	10.1627
4933406I18Rik	15.3105	2.06741	5.08447	10.6348	8.91779	7.33525	0.361865	0.580679	0.72387	7.48745	8.96262
4933406J10Rik	17.4977	12.4044	5.08447	9.7486	6.17385	7.33525	-0.526187	0.397287	0.562029	11.6622	7.75257
4933406M09Rik	2.18721	2.06741	1.69482	0.886237	2.05795	0.978033	-0.584228	0.683301	NA	1.98315	1.30741
4933407K13Rik	34.9953	41.3481	27.1172	55.8329	50.0768	32.7641	0.406765	0.258414	0.415908	34.4869	46.2246
4933408B17Rik	15.3105	14.4718	8.47411	20.3834	19.2075	17.1156	0.579457	0.276714	0.436486	12.7521	18.9022
4933408N05Rik	0	2.06741	6.77929	1.77247	1.37197	0.978033	-0.911772	0.507757	NA	2.9489	1.37416
4933411K16Rik	32.8081	10.337	13.5586	7.08989	15.0916	16.6266	-0.490841	0.349497	0.513589	18.9012	12.936
4933412E12Rik	21.8721	14.4718	25.4223	21.2697	28.8113	18.0936	0.101628	0.784113	0.871762	20.5888	22.7249
4933413J09Rik	32.8081	31.0111	18.6431	37.2219	47.3329	18.0936	0.273815	0.493392	0.650117	27.4874	34.2161
4933416M06Rik	0	0	1.69482	1.77247	1.37197	1.95607	1.26788	0.397433	NA	0.564941	1.70017
4933416M07Rik	15.3105	10.337	6.77929	9.7486	8.91779	9.29131	-0.179812	0.753407	0.85138	10.8089	9.31923
4933417A18Rik	2.18721	0	1.69482	4.43118	1.37197	0.978033	0.771841	0.632633	NA	1.29401	2.26039
4933417D19Rik	13.1233	16.5392	6.77929	12.4073	5.48787	8.31328	-0.471399	0.449114	0.611617	12.1473	8.73615
4933417G07Rik	41.557	10.337	16.9482	11.5211	12.3477	6.35721	-1.12593	0.0439204	0.109786	22.9474	10.0753
4933417O13Rik	6.56163	2.06741	0	0	3.42992	2.44508	0.213858	0.888375	NA	2.87634	1.95833
4933421O10Rik	201.223	117.842	150.839	177.247	178.356	192.183	0.221255	0.307937	0.471095	156.635	182.596
4933422A05Rik	4.37442	2.06741	1.69482	5.31742	2.05795	0.489016	-0.101702	0.940399	NA	2.71222	2.62146
4933424G05Rik	61.2419	31.0111	28.812	50.5155	58.3086	27.3849	0.171841	0.558862	0.705422	40.355	45.403
4933427D14Rik	312.771	204.673	196.599	245.488	279.195	250.376	0.139581	0.36239	0.526776	238.015	258.353
4933427E11Rik	2.18721	2.06741	0	0.886237	0	2.44508	-0.104224	0.950937	NA	1.4182	1.11044
4933427G17Rik	4.37442	6.20222	1.69482	4.43118	4.1159	2.9341	-0.0871666	0.916369	0.952447	4.09049	3.82706
4933427I22Rik	6.56163	0	6.77929	7.97613	11.6617	5.37918	0.843242	0.26181	0.419913	4.44697	8.33901
4933428G20Rik	8.74884	4.13481	8.47411	7.08989	6.17385	4.40115	-0.307097	0.662563	0.787915	7.11925	5.8883
4933430I17Rik	6.56163	8.26962	5.08447	2.65871	4.80188	4.40115	-0.705605	0.35381	0.518355	6.63857	3.95391
4933430M04Rik	0	0	0	0.886237	0.685984	0.978033	1.21204	0.510183	NA	0	0.850084
4933431E20Rik	122.484	152.988	128.807	136.48	141.313	129.589	0.0126459	0.939935	0.965505	134.759	135.794
4933431G14Rik	4.37442	0	13.5586	5.31742	3.42992	1.95607	-0.859405	0.297361	0.459053	5.97767	3.5678
4933433G15Rik	8.74884	4.13481	5.08447	14.1798	12.3477	11.2474	1.08364	0.098576	0.204168	5.98937	12.5916
4933433G19Rik	17.4977	10.337	10.1689	14.1798	31.5552	20.0497	0.818075	0.0937396	0.196885	12.6679	21.9282
4933433H22Rik	2.18721	2.06741	0	1.77247	1.37197	3.42312	0.815872	0.565696	NA	1.4182	2.18919
4933434E20Rik	717.405	680.176	703.351	749.756	856.107	736.459	0.154246	0.107424	0.218176	700.311	780.774
4933439C10Rik	69.9907	51.6851	61.0136	59.3779	55.5647	59.171	-0.0675958	0.764799	0.859976	60.8965	58.0378
4933439K11Rik	21.8721	14.4718	11.8638	16.8385	19.2075	15.6485	0.122095	0.780916	0.8698	16.0692	17.2315
4933440J02Rik	2.18721	2.06741	1.69482	3.54495	2.74393	2.9341	0.718203	0.546458	NA	1.98315	3.07433
4933440M02Rik	6.56163	0	0	3.54495	1.37197	1.95607	0.657988	0.613402	NA	2.18721	2.29099
5031414D18Rik	19.6849	18.6066	15.2534	20.3834	28.1253	25.4289	0.489093	0.219038	0.369505	17.8483	24.6459
5031425E22Rik	336.83	181.932	237.275	272.961	270.278	201.475	-0.0180135	0.903863	0.94584	252.012	248.238
5031425F14Rik	8.74884	4.13481	3.38965	2.65871	3.42992	5.37918	-0.392175	0.612035	0.748603	5.42443	3.8226
5031426D15Rik	115.922	68.2244	77.9619	78.8751	102.212	64.5502	-0.0911143	0.712226	0.823094	87.3694	81.8789
5031434C07Rik	13.1233	8.26962	11.8638	8.86237	10.2898	6.35721	-0.406571	0.464199	0.624845	11.0855	8.50311
5031434O11Rik	13.1233	14.4718	3.38965	14.1798	11.6617	14.6705	0.451028	0.421983	0.586717	10.3282	13.504
5031439G07Rik	973.308	1281.79	1327.05	1205.28	911.672	1336.97	-0.0481948	0.613487	0.74996	1194.05	1151.31
5033403F01Rik	2.18721	8.26962	8.47411	6.20366	8.91779	7.82426	0.330309	0.639915	0.770343	6.31031	7.64857
5033406O09Rik	32.8081	26.8763	15.2534	20.3834	23.3234	22.9838	-0.105734	0.775639	0.865743	24.9793	22.2302
5330417C22Rik	63.4291	66.157	98.2997	120.528	101.526	128.122	0.620562	0.00807386	0.0283095	75.9619	116.725
5330426P16Rik	65.6163	35.1459	72.8774	61.1503	65.8544	47.4346	-0.0212403	0.929991	0.960159	57.8799	58.1464
5330439B14Rik	2.18721	0	1.69482	0	2.05795	0.978033	-0.293023	0.874965	NA	1.29401	1.01199
5430402O13Rik	10.936	14.4718	1.69482	15.9523	5.48787	7.33525	0.0915402	0.898349	0.942588	9.03424	9.59179
5430403N17Rik	4.37442	2.06741	1.69482	2.65871	2.05795	0.489016	-0.721474	0.536966	NA	2.71222	1.73523
5430405H02Rik	17.4977	14.4718	16.9482	13.2936	18.5216	18.0936	0.0454322	0.913687	0.950715	16.3059	16.6362
5430416N02Rik	87.4884	57.8873	62.7084	39.8807	48.7048	51.8357	-0.529024	0.0289227	0.0796131	69.3614	46.8071
5430416O09Rik	166.228	115.775	86.436	101.917	104.269	89.49	-0.292127	0.154331	0.286087	122.813	98.5589
5430419D17Rik	0	2.06741	0	0.886237	1.37197	0.978033	0.620472	0.727904	NA	0.689135	1.07875
5430421F17Rik	0	0	0	0.886237	0	0.489016	0.191745	0.933705	NA	0	0.458418
5430425K12Rik	0	6.20222	1.69482	1.77247	2.05795	0.978033	-0.72576	0.538805	NA	2.63235	1.60282
5430427M07Rik	2.18721	2.06741	1.69482	3.54495	4.1159	1.46705	0.556034	0.634717	NA	1.98315	3.04263
5430427O19Rik	19.6849	10.337	18.6431	14.1798	16.4636	14.6705	-0.104171	0.811645	0.889874	16.2217	15.1046
5430428K19Rik	15.3105	6.20222	3.38965	4.43118	8.2318	2.44508	-0.641107	0.408319	0.573177	8.30078	5.03602
5430431A17Rik	32.8081	14.4718	25.4223	17.7247	15.7776	6.35721	-0.91537	0.0999252	0.206319	24.2341	13.2865
5430437J10Rik	6.56163	8.26962	1.69482	6.20366	6.85984	7.33525	0.359375	0.622554	0.757588	5.50869	6.79958
5530601H04Rik	139.981	82.6962	125.417	91.2824	141.999	94.3802	-0.0931987	0.652721	0.780618	116.031	109.22
5730405O15Rik	10.936	16.5392	6.77929	15.066	8.2318	12.7144	0.0763345	0.881726	0.932447	11.4182	12.0041
5730408K05Rik	43.7442	47.5503	59.3188	23.0422	23.3234	19.5607	-1.21819	3.18821e-05	0.000283502	50.2044	21.9754
5730409E04Rik	319.333	367.998	296.594	330.566	330.644	306.124	-0.0239067	0.841649	0.909646	327.975	322.445
5730420D15Rik	6.56163	2.06741	0	2.65871	2.74393	3.91213	0.277406	0.779658	NA	2.87634	3.10493
5730422E09Rik	8.74884	4.13481	6.77929	6.20366	5.48787	4.40115	-0.297534	0.676543	0.797804	6.55431	5.36422
5730455P16Rik	214.347	235.684	266.087	278.278	294.287	284.608	0.26101	0.0674866	0.15349	238.706	285.724
5730480H06Rik	59.0547	28.9437	25.4223	46.0843	27.4393	16.6266	-0.318962	0.421959	0.586717	37.8069	30.0501
5730507C01Rik	6.56163	4.13481	10.1689	7.97613	8.91779	9.29131	0.314685	0.628382	0.761845	6.95513	8.72841
5730508B09Rik	107.173	88.8984	79.6567	109.893	89.1779	108.073	0.175155	0.389098	0.553675	91.9095	102.381
5730522E02Rik	2.18721	2.06741	0	1.77247	3.42992	2.9341	1.03141	0.466652	NA	1.4182	2.71216
5730559C18Rik	50.3058	39.2807	28.812	24.8146	21.9515	19.5607	-0.817296	0.0262896	0.0737877	39.4662	22.1089
5830411N06Rik	0	0	1.69482	0	2.05795	0.489016	0.249444	0.884091	NA	0.564941	0.848989
5830415F09Rik	107.173	134.381	108.469	96.5998	85.062	92.9131	-0.346736	0.0747925	0.165595	116.674	91.525
5830416P10Rik	15.3105	4.13481	10.1689	7.08989	10.9757	11.2474	0.0205614	0.971039	0.982808	9.8714	9.771
5830417I10Rik	216.534	208.808	172.872	217.128	193.447	178.491	-0.0224527	0.885083	0.934961	199.405	196.355
5830428M24Rik	19.6849	12.4044	6.77929	12.4073	10.2898	13.6925	-0.0423563	0.930639	0.96061	12.9562	12.1298
5830432E09Rik	39.3698	10.337	16.9482	21.2697	18.5216	11.2474	-0.30922	0.462176	0.622999	22.2183	17.0129
5830444B04Rik	19.6849	16.5392	10.1689	25.7009	15.0916	9.78033	0.122624	0.834252	0.904084	15.4644	16.8576
5830454E08Rik	6.56163	2.06741	15.2534	3.54495	4.80188	6.84623	-0.651643	0.364929	0.529391	7.96081	5.06435
5930403L14Rik	24.0593	20.6741	8.47411	9.7486	12.3477	19.0716	-0.35633	0.503733	0.657794	17.7358	13.7227
5930412G12Rik	4.37442	8.26962	13.5586	7.97613	6.85984	9.78033	-0.107834	0.855532	0.91719	8.73421	8.20543
5930430L01Rik	69.9907	51.6851	64.4033	57.6054	73.4002	56.7259	0.0107608	0.965528	0.97944	62.0264	62.5772
6030407O03Rik	2.18721	0	0	2.65871	0.685984	2.44508	1.7403	0.28668	NA	0.72907	1.92993
6030408B16Rik	4.37442	2.06741	0	1.77247	1.37197	0.489016	-0.740046	0.628703	NA	2.14727	1.21115
6030419C18Rik	26.2465	33.0785	23.7275	13.2936	6.17385	11.7364	-1.42685	0.00145712	0.00705786	27.6842	10.4013
6030440G07Rik	4.37442	2.06741	1.69482	1.77247	0	0.978033	-1.68721	0.198564	NA	2.71222	0.916835
6030443J06Rik	63.4291	33.0785	22.0327	45.1981	49.3908	38.6323	0.209972	0.547162	0.695713	39.5134	44.4071
6030458C11Rik	374.013	461.031	377.945	470.592	448.633	472.39	0.204032	0.0458451	0.113329	404.33	463.872
6030466F02Rik	4.37442	2.06741	3.38965	4.43118	1.37197	2.9341	-0.259187	0.829245	NA	3.27716	2.91242
6030468B19Rik	4.37442	2.06741	0	0.886237	2.05795	0.489016	-0.779729	0.579542	NA	2.14727	1.1444
6230400D17Rik	19.6849	2.06741	6.77929	18.611	15.7776	11.7364	0.76597	0.189902	0.333004	9.51053	15.375
6330403A02Rik	8.74884	8.26962	6.77929	7.97613	11.6617	18.0936	0.707401	0.198669	0.344158	7.93258	12.5772
6330403K07Rik	2.18721	41.3481	10.1689	5.31742	7.54582	9.78033	-1.17939	0.0656026	0.150211	17.9014	7.54786
6330407A03Rik	54.6802	24.8089	40.6757	41.6531	41.159	24.9398	-0.168043	0.640995	0.771304	40.0549	35.9173
6330408A02Rik	45.9314	35.1459	54.2343	45.1981	45.2749	54.2808	0.0947957	0.743598	0.844217	45.1039	48.2513
6330409D20Rik	24.0593	10.337	13.5586	18.611	7.54582	4.40115	-0.683282	0.269736	0.428625	15.985	10.186
6330410L21Rik	0	2.06741	3.38965	0.886237	3.42992	0.489016	-1.08984	0.57707	NA	1.81902	1.60172
6330415G19Rik	13.1233	8.26962	10.1689	7.08989	10.9757	12.7144	-0.00632902	0.990665	0.994833	10.5206	10.26
6330416G13Rik	153.105	148.853	130.501	133.822	141.999	166.755	0.0495459	0.791589	0.876312	144.153	147.525
6330418K02Rik	0	0	0	6.20366	5.48787	5.37918	3.96663	0.00350142	NA	0	5.69024
6330549D23Rik	30.6209	22.7415	35.5913	36.3357	33.6132	29.83	0.143345	0.649941	0.778451	29.6512	33.2596
6430531B16Rik	0	2.06741	1.69482	1.77247	8.2318	2.44508	1.58546	0.201528	0.347802	1.25408	4.14979
6430548M08Rik	428.693	516.851	347.439	252.577	222.945	265.536	-0.775136	0.000535957	0.00305629	430.994	247.019
6430550D23Rik	21.8721	16.5392	11.8638	23.9284	18.5216	18.0936	0.277432	0.512437	0.665886	16.7584	20.1812
6430562O15Rik	10.936	8.26962	3.38965	14.1798	7.54582	16.6266	0.790796	0.168921	0.305759	7.53177	12.7841
6430571L13Rik	15.3105	10.337	33.8965	9.7486	4.1159	12.7144	-1.2146	0.0208048	0.0611235	19.848	8.85964
6430573F11Rik	26.2465	51.6851	40.6757	49.6293	47.3329	48.9016	0.301335	0.264427	0.422824	39.5358	48.6213
6430584L05Rik	2.18721	2.06741	1.69482	0.886237	2.05795	0.978033	-0.62009	0.630827	NA	1.98315	1.30741
6530402F18Rik	65.6163	66.157	49.1499	85.965	48.7048	68.4623	0.163297	0.524692	0.676223	60.3077	67.7107
6720489N17Rik	24.0593	6.20222	23.7275	15.066	26.0674	15.6485	0.0650387	0.875422	0.929189	17.9963	18.9273
6820408C15Rik	0	2.06741	0	2.65871	2.74393	1.46705	1.6472	0.26477	NA	0.689135	2.2899
6820431F20Rik	89.6756	47.5503	44.0654	42.5394	37.0431	28.363	-0.723779	0.0285913	0.0788286	60.4304	35.9818
8030451O07Rik	4.37442	8.26962	0	1.77247	0.685984	1.46705	-1.6896	0.151569	NA	4.21468	1.3085
8030462N17Rik	365.264	403.144	315.237	398.807	425.31	361.872	0.129249	0.274943	0.434454	361.215	395.329
8430408G22Rik	153.105	80.6288	149.144	159.523	146.114	153.551	0.248235	0.399752	0.564524	127.626	153.063
8430419L09Rik	546.802	657.435	560.986	568.078	656.486	633.276	0.0799628	0.45662	0.618214	588.408	619.28
8430423G03Rik	2.18721	0	1.69482	0.886237	1.37197	0.489016	-0.541363	0.769571	NA	1.29401	0.91574
8430426J06Rik	96.2372	64.0896	54.2343	45.1981	113.187	30.808	-0.28121	0.418112	0.582747	71.5204	63.0645
8430429K09Rik	39.3698	39.2807	30.5068	28.3596	43.217	36.6762	0.00930643	0.977552	0.986706	36.3858	36.0843
8430430B14Rik	2.18721	4.13481	0	1.77247	3.42992	3.91213	0.618447	0.599305	NA	2.10734	3.03817
8430431K14Rik	115.922	35.1459	64.4033	68.2402	82.318	18.0936	-0.429541	0.254667	0.411525	71.8238	56.2173
8430436N08Rik	4.37442	2.06741	0	0	1.37197	0	-2.18733	0.210217	NA	2.14727	0.457322
9030025P20Rik	13.1233	16.5392	11.8638	18.611	19.8935	13.6925	0.31017	0.474215	0.63371	13.8421	17.399
9030404E10Rik	0	0	0	0.886237	1.37197	0.489016	1.24504	0.484166	NA	0	0.91574
9030612E09Rik	0	4.13481	3.38965	0	1.37197	2.9341	-0.703965	0.571955	NA	2.50815	1.43536
9030617O03Rik	115.922	76.494	84.7411	111.666	95.3517	88.512	0.0962161	0.63364	0.76591	92.3857	98.5098
9030619P08Rik	0	0	0	0	0.685984	0.978033	0.654801	0.720861	NA	0	0.554672
9030624G23Rik	21.8721	18.6066	27.1172	8.86237	8.91779	12.7144	-1.1439	0.0121142	0.0393201	22.532	10.1649
9030624J02Rik	693.345	744.266	671.15	673.54	620.815	760.421	-0.0334426	0.723083	0.829755	702.92	684.925
9130008F23Rik	98.4244	66.157	84.7411	113.438	68.5984	74.3305	0.0303529	0.906506	0.94724	83.1075	85.4557
9130011E15Rik	205.598	152.988	157.619	228.649	242.152	220.057	0.427343	0.0025463	0.0111525	172.068	230.286
9130019O22Rik	52.493	95.1006	69.4877	50.5155	52.8207	50.8577	-0.490798	0.0444798	0.110815	72.3605	51.398
9130019P16Rik	8.74884	6.20222	6.77929	11.5211	7.54582	4.40115	0.0556772	0.936931	0.964066	7.24345	7.82268
9130023H24Rik	129.045	192.269	113.553	179.906	171.496	160.886	0.245001	0.163342	0.298383	144.956	170.763
9130221H12Rik	45.9314	41.3481	50.8447	50.5155	47.3329	53.7918	0.131737	0.591801	0.732179	46.0414	50.5467
9130230L23Rik	37.1826	37.2133	44.0654	72.6714	52.8207	44.5005	0.533322	0.15982	0.293874	39.4871	56.6642
9130401M01Rik	139.981	159.19	171.177	101.917	103.584	115.897	-0.547979	0.000474151	0.00276473	156.783	107.133
9130409J20Rik	0	0	0	0	0.685984	1.46705	1.09656	0.558012	NA	0	0.717678
9230102K24Rik	0	0	0	0	2.74393	0.978033	1.77759	0.391323	NA	0	1.24066
9230102O04Rik	30.6209	26.8763	37.2861	30.132	35.6711	28.363	-0.0229116	0.941812	0.96642	31.5944	31.3887
9230104L09Rik	0	0	0	0	2.05795	0	0.392903	0.860599	NA	0	0.685984
9230110C19Rik	30.6209	14.4718	30.5068	39.8807	43.9029	33.7421	0.61935	0.0661225	0.151221	25.1999	39.1752
9230112D13Rik	2.18721	4.13481	0	0.886237	2.05795	1.46705	-0.421698	0.762268	NA	2.10734	1.47041
9230112J17Rik	2.18721	0	0	0	2.05795	1.46705	0.792642	0.647771	NA	0.72907	1.175
9230114K14Rik	26.2465	28.9437	28.812	28.3596	26.7534	33.2531	0.0819854	0.800592	0.882314	28.0007	29.4554
9230116L04Rik	13.1233	6.20222	10.1689	8.86237	5.48787	11.7364	-0.173314	0.775788	0.865845	9.83147	8.69554
9230116N13Rik	2.18721	2.06741	5.08447	5.31742	18.5216	10.2693	1.80383	0.0300928	0.0821167	3.11303	11.3694
9230117E06Rik	0	0	3.38965	0	0.685984	0	-2.11785	0.318012	NA	1.12988	0.228661
9330020H09Rik	39.3698	47.5503	25.4223	34.5632	22.6375	37.1653	-0.228791	0.461308	0.62225	37.4475	31.4553
9330102E08Rik	8.74884	18.6066	10.1689	20.3834	12.3477	13.6925	0.286142	0.555621	0.702552	12.5081	15.4745
9330111N05Rik	2.18721	2.06741	1.69482	0	2.05795	1.46705	-0.676918	0.641197	NA	1.98315	1.175
9330117O12Rik	0	0	3.38965	0	0.685984	0	-2.42865	0.183694	NA	1.12988	0.228661
9330133O14Rik	43.7442	55.8199	50.8447	57.6054	67.9124	75.3085	0.431101	0.0829028	0.178976	50.1363	66.9421
9330136K24Rik	26.2465	22.7415	16.9482	25.7009	17.1496	13.6925	-0.24321	0.546261	0.695146	21.9787	18.8476
9330151L19Rik	122.484	88.8984	71.1826	111.666	90.5498	91.9351	0.072157	0.727284	0.832513	94.1882	98.0502
9330159F19Rik	10.936	18.6066	16.9482	20.3834	32.9272	25.4289	0.810624	0.17623	0.315069	15.497	26.2465
9330159M07Rik	4.37442	4.13481	11.8638	17.7247	15.7776	21.0277	1.37975	0.010859	0.0359497	6.791	18.1767
9330162012Rik	24.0593	12.4044	27.1172	28.3596	21.2655	23.4728	0.174897	0.641692	0.771829	21.1936	24.366
9330162B11Rik	6.56163	0	1.69482	0	4.1159	1.95607	-0.132679	0.91745	NA	2.75215	2.02399
9330175E14Rik	15.3105	6.20222	5.08447	21.2697	10.2898	23.4728	1.04689	0.050797	0.123042	8.86572	18.3441
9330175M20Rik	2.18721	2.06741	3.38965	1.77247	2.05795	1.95607	-0.378872	0.762373	NA	2.54809	1.92883
9330179D12Rik	0	0	0	0.886237	2.05795	1.95607	2.19992	0.15862	NA	0	1.63342
9330182L06Rik	2.18721	0	0	1.77247	0.685984	4.40115	1.83598	0.224039	NA	0.72907	2.28654
9330188P03Rik	10.936	18.6066	6.77929	15.066	8.91779	12.7144	0.0139248	0.978654	0.98751	12.1073	12.2327
9430015G10Rik	174.977	152.988	179.651	136.48	168.752	180.936	-0.0555686	0.746372	0.846041	169.205	162.056
9430016H08Rik	174.977	177.797	155.924	160.409	170.124	165.288	-0.0297682	0.841707	0.909646	169.566	165.273
9430018G01Rik	26.2465	8.26962	15.2534	15.066	24.0094	8.31328	-0.0973327	0.844502	0.911377	16.5898	15.7962
9430020K01Rik	494.309	547.862	508.447	529.083	465.097	446.472	-0.114611	0.415644	0.580473	516.873	480.217
9430037G07Rik	21.8721	4.13481	8.47411	15.066	22.6375	24.4508	0.919633	0.0707402	0.158996	11.4937	20.7181
9430038I01Rik	72.1779	84.7636	72.8774	35.4495	49.3908	53.3028	-0.707985	0.00315918	0.0133581	76.6063	46.0477
9430041J12Rik	2.18721	0	0	0.886237	0.685984	0	-0.71151	0.669531	NA	0.72907	0.524073
9430060I03Rik	15.3105	2.06741	5.08447	7.97613	7.54582	5.8682	0.00359285	0.995596	0.997555	7.48745	7.13005
9430065F17Rik	4.37442	4.13481	6.77929	9.7486	7.54582	9.29131	0.768669	0.250043	0.406503	5.09617	8.86191
9430069I07Rik	0	4.13481	1.69482	0	1.37197	2.9341	-0.41624	0.813471	NA	1.94321	1.43536
9430076C15Rik	34.9953	10.337	16.9482	15.9523	25.3814	23.9618	0.151369	0.716244	0.825816	20.7602	21.7652
9430078K24Rik	0	6.20222	8.47411	6.20366	3.42992	6.84623	0.210312	0.778114	0.867302	4.89211	5.49327
9430083A17Rik	54.6802	37.2133	40.6757	53.1742	45.9609	48.9016	0.162539	0.565317	0.711809	44.1898	49.3456
9430091E24Rik	129.045	76.494	101.689	127.618	149.544	103.182	0.301135	0.150329	0.280481	102.41	126.782
9530014B07Rik	4.37442	6.20222	20.3379	18.611	12.3477	17.6046	0.835689	0.203533	0.35047	10.3048	16.1878
9530026P05Rik	19.6849	20.6741	8.47411	16.8385	19.2075	12.7144	0.0143896	0.974865	0.985401	16.2777	16.2535
9530027J09Rik	2.18721	0	3.38965	7.08989	13.7197	5.8682	2.13956	0.0292294	0.0802837	1.85895	8.89259
9530051G07Rik	0	0	1.69482	2.65871	2.05795	1.95607	1.63441	0.281142	NA	0.564941	2.22424
9530052E02Rik	2.18721	2.06741	1.69482	0	1.37197	0.489016	-1.64401	0.304782	NA	1.98315	0.620328
9530053A07Rik	2.18721	2.06741	5.08447	1.77247	0	3.42312	-0.905801	0.471643	NA	3.11303	1.73186
9530059O14Rik	6.56163	0	3.38965	1.77247	4.1159	0.978033	-0.535828	0.623091	NA	3.31709	2.2888
9530062K07Rik	10.936	22.7415	6.77929	7.08989	13.0337	8.8023	-0.423311	0.479317	0.63902	13.4856	9.64196
9530068E07Rik	1122.04	1372.76	1415.18	1450.77	1531.8	1352.13	0.149197	0.159937	0.293991	1303.32	1444.9
9530077C05Rik	67.8035	26.8763	25.4223	30.132	53.5067	22.9838	-0.131697	0.685122	0.804237	40.034	35.5408
9530080O11Rik	6.56163	6.20222	3.38965	2.65871	4.1159	3.42312	-0.611954	0.447276	0.610308	5.3845	3.39924
9530082P21Rik	172.79	177.797	133.891	157.75	130.337	146.216	-0.155159	0.354399	0.518875	161.492	144.768
9530091C08Rik	236.219	117.842	176.262	195.858	242.838	79.2207	-0.0982752	0.707551	0.819628	176.774	172.639
9630013A20Rik	15.3105	14.4718	6.77929	11.5211	6.17385	7.33525	-0.532513	0.377795	0.541678	12.1872	8.34339
9630013K17Rik	10.936	6.20222	5.08447	8.86237	8.91779	1.95607	-0.266037	0.704136	0.817415	7.40758	6.57874
9630028B13Rik	4.37442	2.06741	5.08447	3.54495	4.1159	2.9341	-0.147845	0.873675	NA	3.8421	3.53165
9630028I04Rik	0	2.06741	1.69482	4.43118	4.1159	2.9341	1.5626	0.243039	NA	1.25408	3.82706
9830147E19Rik	172.79	167.46	127.112	213.583	174.24	134.969	0.153034	0.537879	0.688956	155.787	174.264
9830166K06Rik	6.56163	2.06741	6.77929	3.54495	2.05795	1.46705	-1.19754	0.205036	NA	5.13611	2.35665
9930012K11Rik	21.8721	12.4044	11.8638	11.5211	9.60377	14.1815	-0.340055	0.478351	0.638087	15.3801	11.7688
9930014A18Rik	69.9907	68.2244	71.1826	114.325	102.898	82.1548	0.493212	0.0242909	0.0692413	69.7992	99.7923
9930021J03Rik	568.674	595.413	618.61	850.787	814.262	661.15	0.368566	0.000480377	0.0027957	594.232	775.4
9930104L06Rik	161.853	130.247	135.586	135.594	117.989	171.645	-0.000446221	0.997904	0.998427	142.562	141.743
9930111J21Rik1	24.0593	35.1459	23.7275	26.5871	26.7534	26.8959	-0.0455283	0.902033	0.944988	27.6442	26.7455
9930111J21Rik2	2.18721	4.13481	3.38965	3.54495	3.42992	0.978033	-0.372618	0.73192	NA	3.23722	2.65097
A130010J15Rik	157.479	132.314	123.722	175.475	155.718	131.545	0.156877	0.341559	0.505522	137.838	154.246
A130077B15Rik	6.56163	2.06741	1.69482	3.54495	2.05795	1.46705	-0.525511	0.630539	NA	3.44129	2.35665
A1bg	2.18721	0	1.69482	2.65871	3.42992	0.978033	0.783872	0.557394	NA	1.29401	2.35555
A230009B12Rik	2.18721	2.06741	0	0.886237	3.42992	1.46705	0.548563	0.752049	NA	1.4182	1.92773
A230020J21Rik	2.18721	0	3.38965	1.77247	2.05795	2.9341	0.252703	0.846581	NA	1.85895	2.25484
A230028O05Rik	2.18721	4.13481	0	1.77247	4.1159	0.978033	0.0588995	0.962677	NA	2.10734	2.2888
A230046K03Rik	1093.6	986.152	872.834	1332.9	1351.39	1181.46	0.390501	1.84861e-05	0.000178516	984.197	1288.58
A230050P20Rik	104.986	80.6288	94.9101	51.4017	44.5889	56.2369	-0.886674	0.000928353	0.00483547	93.5083	50.7425
A230056J06Rik	0	0	0	1.77247	0	0.489016	0.96147	0.655589	NA	0	0.75383
A230056P14Rik	19.6849	12.4044	16.9482	30.132	23.3234	21.0277	0.587429	0.155496	0.287837	16.3458	24.8277
A230057D06Rik	4.37442	6.20222	0	5.31742	4.1159	4.40115	0.431407	0.645522	NA	3.52554	4.61149
A230065H16Rik	2.18721	4.13481	6.77929	0.886237	2.05795	3.91213	-0.891385	0.364436	NA	4.3671	2.28544
A230072C01Rik	54.6802	37.2133	27.1172	52.288	43.9029	34.2312	0.144221	0.627513	0.761378	39.6702	43.474
A230072E10Rik	48.1186	18.6066	25.4223	29.2458	36.3571	26.4069	0.0458565	0.896822	0.941892	30.7159	30.6699
A230103J11Rik	24.0593	6.20222	15.2534	18.611	11.6617	13.2034	-0.0338218	0.944064	0.967779	15.1716	14.492
A230108P19Rik	6.56163	0	0	6.20366	2.05795	4.89016	1.17449	0.283317	NA	2.18721	4.38392
A330009N23Rik	13.1233	8.26962	8.47411	3.54495	3.42992	4.40115	-1.3621	0.0391568	0.10069	9.95566	3.792
A330015K06Rik	2.18721	8.26962	3.38965	3.54495	4.1159	4.40115	-0.134022	0.868864	0.92525	4.61549	4.02067
A330023F24Rik	94.05	72.3592	86.436	109.893	98.0956	78.7317	0.163969	0.42232	0.586965	84.2817	95.5735
A330032B11Rik	4.37442	4.13481	5.08447	8.86237	6.17385	4.89016	0.519413	0.557757	0.704458	4.53123	6.64213
A330033J07Rik	2.18721	4.13481	5.08447	0.886237	0	2.44508	-1.84041	0.12675	NA	3.80216	1.11044
A330035P11Rik	50.3058	37.2133	32.2016	38.1082	32.9272	38.1433	-0.110964	0.702735	0.816724	39.9069	36.3929
A330040F15Rik	2.18721	2.06741	3.38965	2.65871	3.42992	4.89016	0.533573	0.574753	NA	2.54809	3.6596
A330041J22Rik	26.2465	12.4044	10.1689	26.5871	33.6132	21.0277	0.761837	0.0697244	0.157338	16.2733	27.076
A330048O09Rik	0	2.06741	0	1.77247	2.05795	1.46705	1.30976	0.378414	NA	0.689135	1.76582
A330069E16Rik	8.74884	0	3.38965	3.54495	4.1159	8.31328	0.462767	0.588359	0.729871	4.04616	5.32471
A330074K22Rik	0	2.06741	6.77929	6.20366	1.37197	4.40115	0.542012	0.638105	NA	2.9489	3.99226
A330076H08Rik	4.37442	6.20222	0	2.65871	4.80188	4.40115	0.256051	0.773217	0.864066	3.52554	3.95391
A330102I10Rik	6.56163	4.13481	6.77929	5.31742	10.2898	3.42312	0.0391365	0.957221	0.974971	5.82524	6.34343
A3galt2	8.74884	2.06741	1.69482	4.43118	4.80188	8.31328	0.535733	0.520336	0.672576	4.17036	5.84878
A430005L14Rik	209.972	204.673	252.529	122.301	112.501	155.996	-0.771103	2.61509e-07	4.7788e-06	222.391	130.266
A430033K04Rik	135.607	124.044	149.144	177.247	161.206	163.821	0.287338	0.0632591	0.146116	136.265	167.425
A430035B10Rik	19.6849	24.8089	18.6431	23.0422	19.8935	9.29131	-0.348311	0.398716	0.563494	21.0456	17.409
A430046D13Rik	54.6802	41.3481	33.8965	40.7669	39.1011	38.1433	-0.123201	0.656427	0.783639	43.3083	39.3371
A430078G23Rik	21.8721	6.20222	11.8638	8.86237	6.17385	7.33525	-0.80062	0.134241	0.257283	13.3127	7.45716
A430078I02Rik	10.936	12.4044	8.47411	6.20366	26.7534	13.2034	0.523947	0.369376	0.533513	10.6049	15.3868
A430088P11Rik	34.9953	18.6066	25.4223	18.611	17.1496	24.9398	-0.359625	0.347304	0.511596	26.3414	20.2335
A430090L17Rik	50.3058	16.5392	47.455	35.4495	29.4973	11.2474	-0.654194	0.167075	0.303352	38.1	25.398
A430093F15Rik	2.18721	2.06741	0	0	0.685984	0.978033	-1.12825	0.487633	NA	1.4182	0.554672
A430105I19Rik	104.986	82.6962	40.6757	61.1503	43.217	66.9953	-0.38227	0.171822	0.309615	76.1193	57.1209
A4galt	91.8628	111.64	103.384	109.007	101.526	104.65	0.0319492	0.860062	0.920367	102.296	105.061
A530013C23Rik	34.9953	28.9437	27.1172	23.0422	19.8935	25.9179	-0.400318	0.271692	0.430832	30.3521	22.9512
A530016L24Rik	181.538	324.583	245.749	283.596	176.984	175.557	-0.276651	0.336665	0.500558	250.623	212.045
A530032D15Rik	6.56163	0	3.38965	2.65871	2.74393	2.9341	-0.166518	0.886062	NA	3.31709	2.77891
A530053G22Rik	15.3105	4.13481	5.08447	17.7247	7.54582	10.2693	0.62095	0.298461	0.460286	8.17658	11.8466
A530064D06Rik	0	0	1.69482	0.886237	1.37197	2.44508	1.13079	0.538148	NA	0.564941	1.56776
A530065N20Rik	2.18721	0	0	1.77247	2.05795	0.489016	0.86615	0.6277	NA	0.72907	1.43981
A530072M11Rik	0	2.06741	3.38965	1.77247	4.80188	6.84623	1.30093	0.229201	0.382386	1.81902	4.47353
A530088E08Rik	0	2.06741	0	0	2.05795	1.46705	0.841533	0.646111	NA	0.689135	1.175
A530099J19Rik	8.74884	10.337	6.77929	8.86237	9.60377	6.84623	-0.0400301	0.94561	0.968755	8.62172	8.43746
A630001G21Rik	32.8081	35.1459	22.0327	17.7247	32.9272	28.363	-0.152005	0.677123	0.798003	29.9956	26.3383
A630012P03Rik	2.18721	0	1.69482	1.77247	0	1.46705	-0.368931	0.844114	NA	1.29401	1.07984
A630020A06	2.18721	2.06741	0	5.31742	4.1159	2.44508	1.64372	0.209841	NA	1.4182	3.95947
A630023A22Rik	67.8035	22.7415	20.3379	32.7908	72.7143	54.7698	0.577664	0.181391	0.321698	36.9609	53.425
A630033H20Rik	45.9314	37.2133	50.8447	42.5394	36.3571	30.319	-0.324755	0.266513	0.425002	44.6631	36.4052
A630066F11Rik	28.4337	24.8089	27.1172	27.4733	26.0674	23.4728	-0.0673593	0.846061	0.912004	26.7866	25.6712
A630072M18Rik	111.548	66.157	105.079	113.438	107.699	95.3582	0.152181	0.417036	0.581938	94.2612	105.499
A630075F10Rik	6.56163	2.06741	6.77929	8.86237	5.48787	5.8682	0.355826	0.622481	0.757561	5.13611	6.73948
A630076J17Rik	6.56163	6.20222	0	4.43118	9.60377	2.9341	0.467457	0.557519	0.704367	4.25461	5.65635
A630077J23Rik	41.557	16.5392	16.9482	19.4972	18.5216	20.5387	-0.331216	0.493278	0.650041	25.0148	19.5192
A630089N07Rik	113.735	47.5503	72.8774	60.2641	82.318	44.0115	-0.3255	0.16365	0.298766	78.0542	62.1979
A630095N17Rik	0	2.06741	6.77929	3.54495	2.05795	5.8682	0.454156	0.667001	NA	2.9489	3.8237
A730017C20Rik	0	0	0	0.886237	2.74393	0.978033	2.00913	0.313347	NA	0	1.53607
A730017L22Rik	56.8674	41.3481	44.0654	62.0366	61.0525	38.1433	0.154937	0.577238	0.72061	47.427	53.7441
A730020E08Rik	4.37442	0	6.77929	6.20366	4.1159	3.42312	0.242978	0.805946	NA	3.7179	4.58089
A730020M07Rik	0	2.06741	5.08447	3.54495	2.05795	0.489016	-0.345421	0.785665	NA	2.38396	2.03064
A730056A06Rik	4.37442	2.06741	6.77929	2.65871	6.17385	2.44508	-0.30324	0.714675	0.82494	4.40704	3.75921
A730085K08Rik	34.9953	22.7415	13.5586	8.86237	34.9852	13.2034	-0.330897	0.525114	0.676633	23.7651	19.017
A730090H04Rik	6.56163	4.13481	6.77929	10.6348	5.48787	4.40115	0.180389	0.806624	0.886341	5.82524	6.84129
A730090N16Rik	39.3698	14.4718	8.47411	8.86237	18.5216	7.82426	-0.72585	0.143242	0.270395	20.7719	11.7361
A830009L08Rik	2.18721	6.20222	1.69482	2.65871	1.37197	3.42312	-0.398171	0.710838	NA	3.36142	2.4846
A830010M20Rik	104.986	84.7636	71.1826	115.211	122.105	89.49	0.32454	0.120429	0.238048	86.9774	108.935
A830018L16Rik	15.3105	6.20222	5.08447	10.6348	10.2898	11.7364	0.416308	0.46128	0.62225	8.86572	10.887
A830052D11Rik	6.56163	0	3.38965	3.54495	4.1159	4.40115	0.436882	0.64662	NA	3.31709	4.02067
A830080D01Rik	190.287	152.988	184.736	225.99	258.616	219.568	0.413783	0.0132822	0.0424679	176.004	234.725
A830082K12Rik	13.1233	12.4044	11.8638	12.4073	4.80188	8.8023	-0.558274	0.284442	0.445588	12.4638	8.6705
A830082N09Rik	80.9267	37.2133	42.3706	57.6054	71.3423	52.3248	0.211054	0.394045	0.558918	53.5035	60.4241
A930001C03Rik	2.18721	0	11.8638	5.31742	6.17385	7.33525	0.355059	0.664016	0.789245	4.68366	6.27551
A930003O13Rik	2.18721	0	0	0.886237	3.42992	0.978033	1.19532	0.45882	NA	0.72907	1.76473
A930004D18Rik	30.6209	33.0785	18.6431	21.2697	19.8935	33.7421	-0.0994307	0.79853	0.880904	27.4475	24.9684
A930005H10Rik	41.557	24.8089	23.7275	35.4495	30.1833	25.9179	0.0298262	0.933683	0.96228	30.0311	30.5169
A930006I01Rik	4.37442	4.13481	3.38965	1.77247	6.17385	3.91213	0.02437	0.977695	0.986732	3.96629	3.95282
A930006K02Rik	24.0593	8.26962	8.47411	7.08989	8.91779	10.2693	-0.54292	0.34975	0.513763	13.601	8.75901
A930007I19Rik	19.6849	10.337	5.08447	27.4733	16.4636	19.0716	0.893019	0.0779364	0.17097	11.7021	21.0029
A930009A15Rik	4.37442	0	3.38965	0	2.05795	0.489016	-1.60938	0.388531	NA	2.58802	0.848989
A930012L18Rik	32.8081	12.4044	13.5586	20.3834	20.5795	6.84623	-0.318637	0.541457	0.691799	19.5904	15.9364
A930013F10Rik	185.913	74.4266	101.689	115.211	139.255	89.49	-0.0423095	0.860899	0.920747	120.676	114.652
A930015D03Rik	72.1779	49.6177	40.6757	37.2219	67.2264	43.5225	-0.108372	0.674926	0.796618	54.1571	49.3236
A930016O22Rik	6.56163	0	6.77929	0.886237	0.685984	0.978033	-2.37592	0.0532546	NA	4.44697	0.850084
A930017M01Rik	0	6.20222	1.69482	0.886237	2.05795	0.489016	-1.29095	0.337895	NA	2.63235	1.1444
A930019D19Rik	10.936	4.13481	8.47411	14.1798	17.8356	10.7584	0.848278	0.137497	0.262076	7.84832	14.2579
A930024E05Rik	15.3105	20.6741	13.5586	31.0183	32.2412	24.4508	0.821968	0.0405915	0.103558	16.5144	29.2368
A930041C12Rik	15.3105	0	6.77929	9.7486	10.2898	7.82426	0.488123	0.466268	0.626544	7.36325	9.28754
AA388235	6.56163	20.6741	23.7275	26.5871	28.1253	24.9398	0.638557	0.10213	0.209763	16.9877	26.5508
AA413626	15.3105	2.06741	5.08447	6.20366	9.60377	9.29131	0.296767	0.670537	0.793969	7.48745	8.36625
AA414768	4.37442	0	5.08447	6.20366	6.85984	3.91213	0.78042	0.357755	0.521959	3.15296	5.65854
AA415398	21.8721	45.4829	44.0654	38.9944	34.9852	35.6982	-0.0324628	0.917904	0.953026	37.1401	36.5593
AA465934	15.3105	6.20222	13.5586	7.08989	3.42992	10.2693	-0.713951	0.297275	0.458966	11.6904	6.92972
AA467197	4.37442	0	0	2.65871	3.42992	3.42312	1.38316	0.303362	NA	1.45814	3.17058
AA474331	24.0593	20.6741	27.1172	28.3596	34.9852	34.2312	0.443584	0.18673	0.328777	23.9502	32.5253
AA536875	0	2.06741	0	0.886237	0	0.489016	-0.795522	0.678193	NA	0.689135	0.458418
AA543186	6.56163	33.0785	20.3379	23.9284	23.3234	17.6046	0.145996	0.748172	0.84734	19.9927	21.6188
AA986860	65.6163	51.6851	57.624	55.8329	76.1442	42.0554	-0.0480416	0.843017	0.91047	58.3085	58.0108
Aaas	87.4884	107.505	159.313	123.187	122.105	135.947	0.105099	0.571305	0.716449	118.102	127.08
Aacs	776.459	996.489	754.196	514.017	338.876	496.352	-0.900909	0.00694466	0.0250398	842.382	449.748
Aaed1	365.264	384.537	433.875	403.238	506.942	491.462	0.248641	0.0955646	0.199527	394.559	467.214
Aagab	474.624	541.66	499.973	498.951	445.203	525.693	-0.0418233	0.685933	0.804716	505.419	489.949
Aak1	1036.74	843.501	855.886	1193.76	1182.64	745.75	0.165093	0.173455	0.31142	912.041	1040.72
Aamdc	179.351	229.482	227.106	196.745	207.853	225.437	-0.00867057	0.947033	0.969888	211.98	210.011
Aamp	1213.9	1467.86	1284.68	945.615	854.049	1183.42	-0.409012	0.00529715	0.0201786	1322.14	994.361
Aanat	13.1233	4.13481	5.08447	6.20366	4.1159	3.91213	-0.61568	0.420579	0.585278	7.44751	4.7439
Aar2	266.84	361.796	355.913	295.117	289.485	342.312	-0.0791579	0.521803	0.674016	328.183	308.971
Aard	0	2.06741	5.08447	4.43118	4.1159	4.40115	0.795503	0.427521	NA	2.38396	4.31608
Aars	1161.41	1403.77	1274.51	1254.91	991.932	1362.89	-0.0860242	0.46443	0.625009	1279.89	1203.24
Aars2	157.479	173.662	98.2997	77.1026	72.7143	107.584	-0.720883	0.000829728	0.00440436	143.147	85.8002
Aarsd1	264.652	324.583	284.73	202.062	198.935	213.211	-0.503715	9.99782e-05	0.000746879	291.322	204.736
Aasdh	234.031	188.134	215.243	227.763	229.804	208.81	0.0624453	0.677127	0.798003	212.469	222.126
Aasdhppt	457.127	574.739	405.063	516.676	574.168	480.703	0.126499	0.363178	0.527453	478.976	523.849
Aass	376.2	357.661	267.782	233.966	340.248	200.497	-0.383321	0.00355912	0.0146992	333.881	258.237
Aatf	299.648	523.054	438.959	480.34	436.971	510.044	0.198702	0.12474	0.244194	420.553	475.785
Aatk	85.3012	70.2918	59.3188	42.5394	24.6954	48.9016	-0.897647	0.000786468	0.00420394	71.6372	38.7121
AB124611	39.3698	12.4044	25.4223	12.4073	20.5795	13.6925	-0.681998	0.0797053	0.173951	25.7322	15.5598
Abat	80.9267	111.64	89.8256	88.6237	80.9461	79.2207	-0.206347	0.382206	0.546632	94.1307	82.9301
Abca1	1784.76	2319.63	1859.22	2832.41	2637.61	2439.7	0.400858	0.00136419	0.00668617	1987.87	2636.57
Abca12	6.56163	2.06741	3.38965	4.43118	2.74393	3.42312	-0.091846	0.916606	NA	4.00623	3.53274
Abca13	0	2.06741	1.69482	2.65871	3.42992	2.9341	1.30551	0.329804	NA	1.25408	3.00758
Abca17	0	2.06741	0	1.77247	2.05795	0.978033	1.13009	0.4723	NA	0.689135	1.60282
Abca2	616.793	814.558	716.91	534.401	433.542	508.577	-0.539152	6.12894e-05	0.000493318	716.087	492.173
Abca3	968.934	1279.72	1328.74	1241.62	1048.18	1269	0.00611859	0.951529	0.971759	1192.47	1186.27
Abca4	13.1233	8.26962	5.08447	8.86237	10.2898	9.78033	0.178083	0.778475	0.867578	8.82578	9.64415
Abca5	225.283	233.617	266.087	314.614	306.635	265.047	0.272676	0.0393375	0.101053	241.662	295.432
Abca6	209.972	237.752	255.918	193.2	262.732	186.315	-0.153826	0.366126	0.530322	234.547	214.082
Abca7	249.342	246.021	269.477	131.163	126.221	197.074	-0.751257	6.62077e-06	7.49226e-05	254.947	151.486
Abca8a	975.495	1207.36	1147.4	856.105	843.76	834.751	-0.403694	0.0131321	0.0420497	1110.09	844.872
Abca8b	225.283	190.201	137.281	127.618	172.182	115.897	-0.406057	0.0173119	0.0527364	184.255	138.566
Abca9	673.66	824.895	720.3	680.63	655.8	583.886	-0.223602	0.143774	0.270965	739.618	640.105
Abcb10	277.776	361.796	306.763	364.243	364.257	332.531	0.163432	0.245571	0.401498	315.445	353.677
Abcb11	2.18721	2.06741	1.69482	0.886237	3.42992	5.8682	0.862148	0.430571	NA	1.98315	3.39478
Abcb1a	102.799	157.123	135.586	140.912	137.883	117.853	-0.0132542	0.941325	0.966127	131.836	132.216
Abcb1b	63.4291	53.7525	54.2343	62.0366	62.4245	57.2149	0.0858879	0.701314	0.815743	57.1386	60.5587
Abcb4	6.56163	18.6066	27.1172	8.86237	3.42992	3.91213	-1.55204	0.0289784	0.0797376	17.4285	5.40147
Abcb6	275.588	343.189	333.88	225.104	237.35	267.492	-0.376374	0.00147351	0.00712262	317.553	243.315
Abcb7	748.026	748.401	784.703	1072.35	1096.2	815.68	0.368811	0.000762689	0.00409402	760.376	994.743
Abcb8	380.574	417.616	389.809	260.554	216.085	274.338	-0.659949	3.45383e-07	6.00275e-06	396	250.326
Abcb9	146.543	190.201	147.45	69.1265	37.7291	80.6877	-1.36761	4.46339e-09	1.39442e-07	161.398	62.5144
Abcc1	349.953	343.189	310.153	341.201	267.534	386.323	-0.015919	0.904831	0.946209	334.432	331.686
Abcc10	247.155	157.123	171.177	85.0787	98.0956	76.7756	-1.13443	1.01809e-09	3.87864e-08	191.818	86.65
Abcc12	0	2.06741	0	0.886237	0.685984	0.978033	0.226683	0.89794	NA	0.689135	0.850084
Abcc2	4.37442	0	0	3.54495	1.37197	1.46705	0.997555	0.520182	NA	1.45814	2.12799
Abcc3	98.4244	183.999	128.807	118.756	116.617	119.809	-0.204461	0.350988	0.515077	137.077	118.394
Abcc4	115.922	150.921	138.975	109.007	85.7479	94.8692	-0.501366	0.0150304	0.0470244	135.273	96.5414
Abcc5	409.008	270.83	299.984	303.979	321.04	354.048	0.0174829	0.899937	0.943735	326.607	326.356
Abcc6	2.18721	2.06741	1.69482	0	0	1.95607	-1.57096	0.292868	NA	1.98315	0.652022
Abcc8	2.18721	0	0	1.77247	1.37197	0.978033	0.916493	0.59898	NA	0.72907	1.37416
Abcc9	520.556	690.513	569.46	628.342	581.028	566.281	-0.00629312	0.961351	0.97741	593.51	591.884
Abcd1	297.46	272.897	254.223	249.033	211.969	239.618	-0.22963	0.145608	0.273576	274.86	233.54
Abcd2	656.163	932.4	837.242	1455.2	1069.45	1216.67	0.623013	0.0007296	0.00393577	808.602	1247.11
Abcd3	2290.01	2743.45	2642.23	3403.15	3757.82	3199.15	0.4397	6.0123e-05	0.000486493	2558.56	3453.37
Abcd4	109.36	134.381	106.774	97.486	109.757	99.2703	-0.189013	0.291966	0.453519	116.839	102.171
Abce1	2576.53	3127.98	2504.95	3069.04	3108.88	2885.69	0.147275	0.167439	0.303845	2736.49	3021.2
Abcf1	1185.47	1552.62	1357.55	1288.59	1022.8	1562.41	-0.0802112	0.513873	0.666968	1365.21	1291.27
Abcf2	632.103	951.006	967.744	760.391	655.8	810.789	-0.181927	0.0766986	0.169066	850.285	742.327
Abcf3	927.377	895.186	742.332	672.654	600.236	698.805	-0.362667	0.0136203	0.0433765	854.965	657.231
Abcg1	242.78	297.706	169.482	168.385	180.414	171.645	-0.446376	0.0338122	0.0896942	236.656	173.481
Abcg2	6563.82	7692.81	5487.84	5203.1	7626.08	4027.05	-0.238002	0.183271	0.324204	6581.49	5618.74
Abcg3	102.799	64.0896	61.0136	70.0127	89.1779	55.2589	-0.0748706	0.723311	0.829892	75.9673	71.4831
Abcg4	4.37442	18.6066	6.77929	5.31742	6.17385	8.8023	-0.512741	0.454348	0.616217	9.92012	6.76452
Abcg5	4.37442	10.337	3.38965	7.08989	5.48787	12.7144	0.496872	0.485552	0.644184	6.0337	8.43073
Abcg8	4.37442	2.06741	0	2.65871	3.42992	3.91213	0.719113	0.558042	NA	2.14727	3.33359
Abhd1	6.56163	0	0	0.886237	2.05795	2.44508	-0.0803288	0.946576	NA	2.18721	1.79642
Abhd10	148.73	109.572	113.553	151.546	167.38	122.743	0.24298	0.142508	0.26935	123.952	147.223
Abhd11	454.94	589.21	530.48	327.908	312.808	414.686	-0.564911	1.0736e-08	2.98207e-07	524.877	351.801
Abhd11os	48.1186	59.9548	67.7929	15.9523	24.6954	27.8739	-1.3283	3.20836e-06	4.03246e-05	58.6221	22.8405
Abhd12	564.3	750.468	710.131	670.881	688.041	636.699	-0.013833	0.901299	0.944645	674.966	665.207
Abhd13	912.066	1064.71	942.322	1100.71	1269.07	1039.65	0.220562	0.0200681	0.0592885	973.034	1136.47
Abhd14a	137.794	152.988	149.144	105.462	92.6078	118.342	-0.472856	0.0100136	0.033651	146.642	105.471
Abhd14b	286.524	359.729	352.523	377.537	350.538	341.334	0.0948284	0.458616	0.620134	332.925	356.469
Abhd15	65.6163	105.438	83.0463	104.576	96.7237	114.919	0.316896	0.115982	0.23101	84.7001	105.406
Abhd16a	367.451	479.638	447.433	272.075	229.804	314.927	-0.660795	1.41371e-08	3.78899e-07	431.507	272.269
Abhd16b	8.74884	12.4044	5.08447	4.43118	4.80188	6.84623	-0.655429	0.308976	0.472016	8.74591	5.35977
Abhd17a	376.2	382.47	323.711	141.798	109.757	147.683	-1.43494	5.04184e-16	9.28002e-14	360.794	133.079
Abhd17b	450.565	489.975	510.142	737.349	857.479	629.364	0.611486	9.05652e-05	0.000688341	483.561	741.398
Abhd17c	1751.95	2879.9	2781.2	3311.87	3189.14	2918.45	0.407029	0.0246586	0.0700334	2471.02	3139.82
Abhd2	785.208	1126.74	1255.86	1384.3	1243	1381.47	0.36053	0.000294165	0.00186704	1055.94	1336.26
Abhd3	28.4337	55.8199	30.5068	37.2219	49.3908	35.2092	0.0740567	0.811267	0.889523	38.2535	40.6073
Abhd4	583.985	702.918	657.591	667.336	737.432	809.322	0.191529	0.0954859	0.19947	648.165	738.03
Abhd5	3884.48	3446.36	2454.1	2978.64	3670.7	2321.85	-0.125119	0.120272	0.237913	3261.65	2990.4
Abhd6	52.493	62.0222	54.2343	97.486	86.4339	74.3305	0.600473	0.0165308	0.0508132	56.2498	86.0835
Abhd8	69.9907	84.7636	77.9619	28.3596	17.8356	27.8739	-1.65707	1.72526e-10	8.87313e-09	77.5721	24.6897
Abi1	1108.92	1118.47	1120.28	1467.61	1496.13	1362.89	0.369907	0.000165781	0.00115172	1115.89	1442.21
Abi2	393.698	419.683	396.589	549.467	605.723	444.027	0.383161	0.00140531	0.00683724	403.323	533.072
Abi3	80.9267	51.6851	55.9292	45.1981	37.0431	49.3907	-0.497755	0.0585265	0.13745	62.847	43.8773
Abi3bp	314.958	217.078	240.665	230.422	247.64	196.585	-0.191681	0.23588	0.390202	257.567	224.882
Abl1	1441.37	1298.33	1305.01	1139.7	895.208	1179.51	-0.334282	0.00601008	0.0223214	1348.24	1071.47
Abl2	741.464	744.266	786.398	969.543	912.358	938.912	0.311282	0.000578429	0.00325956	757.376	940.271
Ablim1	1093.6	990.287	906.73	1097.16	1059.84	1058.72	0.105328	0.293774	0.455356	996.874	1071.91
Ablim2	32.8081	37.2133	28.812	18.611	13.0337	18.5826	-0.980736	0.00452387	0.0178213	32.9445	16.7424
Ablim3	332.456	355.594	218.632	264.985	214.713	221.035	-0.37244	0.0228705	0.065861	302.227	233.578
Abo	2.18721	0	0	0.886237	0	1.46705	0.297915	0.87568	NA	0.72907	0.784429
Abr	907.692	1079.19	652.507	763.936	710.679	644.524	-0.30795	0.105163	0.214466	879.795	706.38
Abra	13.1233	20.6741	30.5068	6.20366	9.60377	6.84623	-1.24417	0.138961	0.264139	21.4347	7.55122
Abracl	454.94	409.346	433.875	475.909	595.434	486.571	0.257256	0.0313538	0.0847025	432.72	519.305
Abt1	139.981	159.19	149.144	121.414	122.791	126.655	-0.270773	0.0717406	0.160677	149.439	123.62
Abtb1	179.351	219.145	216.937	129.391	107.699	162.353	-0.624776	0.000234002	0.00153953	205.144	133.148
Abtb2	328.081	293.572	250.834	263.212	177.67	217.612	-0.386837	0.0523925	0.126122	290.829	219.498
Acaa1a	505.245	593.345	533.869	376.651	309.379	441.093	-0.535027	7.37697e-05	0.000579623	544.153	375.707
Acaa1b	6.56163	37.2133	28.812	42.5394	18.5216	42.5444	0.584227	0.143382	0.270458	24.1956	34.5351
Acaa2	833.327	1149.48	1120.28	793.182	948.715	964.83	-0.178053	0.175248	0.313864	1034.36	902.242
Acaca	19960.5	20932.5	15378.8	17872.7	20939.6	12802	-0.155333	0.331355	0.495373	18757.3	17204.8
Acacb	2246.26	2055	1482.97	981.064	851.306	735.97	-1.16583	3.37632e-08	7.99722e-07	1928.08	856.113
Acad10	111.548	152.988	89.8256	112.552	111.815	112.963	-0.0553162	0.7726	0.863618	118.12	112.443
Acad11	774.272	849.704	703.351	899.53	867.083	784.382	0.13064	0.220582	0.371372	775.776	850.332
Acad12	34.9953	55.8199	55.9292	31.0183	44.5889	40.0994	-0.318323	0.268299	0.426959	48.9148	38.5689
Acad8	374.013	361.796	337.27	369.561	363.571	350.136	0.014836	0.887912	0.936097	357.693	361.089
Acad9	1270.77	1639.45	2050.74	1992.26	1605.89	2102.77	0.218211	0.0971453	0.201972	1653.65	1900.31
Acadl	1268.58	1385.16	1610.08	2004.67	2784.41	2381.02	0.760039	1.83061e-05	0.00017689	1421.27	2390.03
Acadm	925.19	1143.28	1159.26	1362.15	1418.61	1450.91	0.393443	0.000161582	0.00112717	1075.91	1410.56
Acads	457.127	607.817	649.117	315.5	240.094	411.752	-0.82996	4.58177e-13	4.55066e-11	571.354	322.449
Acadsb	2025.36	2069.47	1852.44	2099.49	2335.09	1814.25	0.060488	0.589819	0.730675	1982.42	2082.94
Acadvl	1447.93	1918.55	1737.19	1548.26	1679.97	1647.01	-0.0585074	0.572341	0.717289	1701.23	1625.08
Acan	4.37442	0	1.69482	0	2.05795	0.978033	-0.707141	0.68644	NA	2.02308	1.01199
Acap1	54.6802	26.8763	28.812	26.5871	30.1833	32.2751	-0.256264	0.439582	0.603694	36.7895	29.6818
Acap2	2834.62	2679.36	2049.04	2722.52	2551.17	2184.44	-0.00941552	0.946523	0.969496	2521.01	2486.04
Acap3	262.465	248.089	271.172	179.906	146.114	212.233	-0.541956	0.000476298	0.00277465	260.575	179.418
Acat1	1511.36	1616.71	1637.2	1642.2	1765.72	1523.78	0.0416975	0.662441	0.787915	1588.42	1643.9
Acat2	367.451	310.111	313.542	304.865	358.769	267.492	-0.105699	0.572723	0.717407	330.368	310.376
Acat3	17.4977	8.26962	15.2534	15.066	8.91779	7.33525	-0.428337	0.419771	0.584474	13.6736	10.4397
Acbd3	684.597	764.94	652.507	888.895	894.522	801.009	0.295185	0.00370444	0.0151764	700.681	861.476
Acbd4	275.588	353.526	308.458	176.361	168.066	234.728	-0.696965	0.000140974	0.00099799	312.524	193.052
Acbd5	713.03	880.715	750.807	1184.9	1288.28	1030.36	0.570814	3.31577e-07	5.80906e-06	781.517	1167.84
Acbd6	172.79	219.145	215.243	186.996	176.984	213.7	-0.0653594	0.627636	0.761467	202.392	192.56
Acbd7	148.73	124.044	174.567	116.983	151.602	83.6218	-0.370646	0.213265	0.361764	149.114	117.402
Accs	111.548	107.505	111.858	101.031	111.129	133.991	0.0728712	0.712139	0.823094	110.304	115.384
Accsl	0	2.06741	0	0.886237	1.37197	2.44508	1.16847	0.466813	NA	0.689135	1.56776
Acd	89.6756	99.2355	142.365	82.42	72.0283	111.007	-0.321652	0.0849567	0.182518	110.425	88.485
Ace	428.693	626.424	496.583	312.842	305.263	357.471	-0.672613	0.000197435	0.00133409	517.233	325.192
Ace2	37.1826	20.6741	25.4223	22.1559	33.6132	18.5826	-0.179881	0.614006	0.750274	27.7597	24.7839
Acer2	139.981	155.055	154.229	207.379	230.49	200.008	0.498922	0.0103183	0.0344779	149.755	212.626
Acer3	374.013	318.38	294.899	401.465	438.343	331.553	0.241432	0.0268915	0.0751595	329.097	390.454
Ache	6.56163	8.26962	1.69482	1.77247	2.74393	2.44508	-1.15323	0.171781	NA	5.50869	2.3205
Acin1	1517.92	1414.11	1281.29	1495.08	1233.4	1596.15	0.0359116	0.742072	0.843186	1404.44	1441.54
Ackr1	24.0593	26.8763	35.5913	19.4972	22.6375	32.7641	-0.200678	0.56887	0.714513	28.8423	24.9663
Ackr2	24.0593	35.1459	42.3706	20.3834	24.0094	20.0497	-0.682807	0.0562661	0.133322	33.8586	21.4808
Ackr3	196.849	200.538	244.054	138.253	199.621	183.87	-0.300285	0.260594	0.418357	213.814	173.915
Ackr4	164.041	146.786	179.651	159.523	142.685	181.914	-0.0211605	0.899334	0.943362	163.493	161.374
Acly	15177	19324	13545	10714.6	10100.4	9968.6	-0.655531	0.0616293	0.143009	16015.4	10261.2
Acmsd	2.18721	0	3.38965	6.20366	7.54582	4.40115	1.60241	0.109089	0.220589	1.85895	6.05021
Acnat1	2.18721	10.337	20.3379	14.1798	6.85984	16.1375	0.43509	0.493737	0.650187	10.954	12.3924
Aco1	1821.95	2286.55	1943.96	2258.13	1909.09	2209.87	0.0801033	0.46443	0.625009	2017.49	2125.7
Aco2	3453.6	4540.02	3884.53	3014.09	2759.03	2905.74	-0.449087	0.000333804	0.00206542	3959.39	2892.95
Acot1	835.514	1664.26	2101.58	1791.08	2491.49	2472.47	0.717021	0.0607764	0.14145	1533.79	2251.68
Acot10	2.18721	2.06741	5.08447	0	0	0.978033	-3.14997	0.043944	NA	3.11303	0.326011
Acot11	96.2372	62.0222	50.8447	45.1981	34.9852	40.0994	-0.730637	0.0169199	0.051666	69.7014	40.0942
Acot13	269.027	299.774	310.153	233.08	272.335	259.179	-0.199361	0.113973	0.227811	292.984	254.865
Acot2	96.2372	179.864	164.398	146.229	183.158	198.052	0.297831	0.126212	0.246157	146.833	175.813
Acot3	39.3698	22.7415	15.2534	11.5211	15.0916	16.1375	-0.790414	0.0941726	0.197532	25.7882	14.2501
Acot4	63.4291	47.5503	28.812	44.3118	42.531	35.2092	-0.161688	0.569407	0.714894	46.5971	40.684
Acot5	2.18721	8.26962	6.77929	1.77247	6.85984	3.42312	-0.519837	0.486209	0.644676	5.74537	4.01847
Acot6	284.337	268.763	196.599	173.702	218.829	178.491	-0.377212	0.0356832	0.0934727	249.9	190.341
Acot7	76.5523	88.8984	62.7084	40.7669	39.1011	54.2808	-0.763939	0.00836601	0.0290694	76.0531	44.7163
Acot8	124.671	109.572	106.774	73.5576	75.4582	69.4403	-0.640895	0.00183416	0.00852722	113.672	72.8187
Acot9	415.57	376.268	445.738	436.028	432.856	457.23	0.0982801	0.446462	0.609853	412.525	442.038
Acox1	1281.7	1575.36	1355.86	2164.19	1900.86	2075.39	0.544579	1.2923e-08	3.50664e-07	1404.31	2046.81
Acox2	10.936	16.5392	10.1689	23.9284	9.60377	22.4948	0.560774	0.219414	0.369895	12.5481	18.6756
Acox3	332.456	353.526	328.796	350.063	310.065	362.361	0.0137674	0.911428	0.949529	338.259	340.83
Acoxl	4.37442	0	1.69482	5.31742	3.42992	5.37918	1.34904	0.220043	NA	2.02308	4.70884
Acp1	389.323	401.077	430.485	389.058	450.005	462.61	0.0954563	0.409992	0.575007	406.962	433.891
Acp2	382.762	430.02	418.621	481.227	452.063	490.973	0.208594	0.0336475	0.0893349	410.468	474.754
Acp5	343.392	583.008	455.907	399.693	366.315	472.879	-0.157322	0.365941	0.530282	460.769	412.962
Acp6	181.538	217.078	245.749	195.858	192.075	202.453	-0.119836	0.418263	0.582905	214.788	196.796
Acpp	39.3698	49.6177	45.7602	51.4017	41.845	66.5062	0.239542	0.463346	0.623934	44.9159	53.251
Acpt	13.1233	8.26962	5.08447	2.65871	3.42992	0.978033	-1.94977	0.00864414	0.0298973	8.82578	2.35555
Acr	2.18721	2.06741	0	3.54495	2.74393	1.95607	1.00977	0.457799	NA	1.4182	2.74832
Acrbp	113.735	62.0222	50.8447	41.6531	41.159	44.5005	-0.781674	0.00539333	0.0204553	75.5339	42.4375
Acrv1	2.18721	8.26962	0	3.54495	6.85984	1.95607	0.295289	0.760285	NA	3.48561	4.12028
Acsbg1	21.8721	16.5392	3.38965	12.4073	15.0916	13.2034	0.0332153	0.951138	0.971749	13.9337	13.5675
Acsf2	129.045	155.055	174.567	173.702	156.404	142.793	0.0279893	0.866102	0.923851	152.889	157.633
Acsf3	225.283	231.549	225.411	186.996	152.288	226.415	-0.270735	0.0636272	0.146744	227.414	188.566
Acsl1	22348.9	32369.4	19954.8	22710.7	27931.9	18870.2	-0.0958597	0.429468	0.593593	24891	23170.9
Acsl3	330.269	489.975	516.921	535.287	873.257	552.589	0.53381	0.0216647	0.0630663	445.722	653.711
Acsl4	7237.48	9522.47	7969.06	8846.41	14303.4	6925.45	0.269152	0.369727	0.533915	8243	10025.1
Acsl5	826.765	996.489	988.082	1140.59	1252.61	1186.35	0.353144	0.000504856	0.00291058	937.112	1193.18
Acsl6	0	4.13481	10.1689	2.65871	0.685984	3.42312	-0.973891	0.386897	NA	4.76792	2.25594
Acsm3	30.6209	28.9437	22.0327	40.7669	65.8544	28.852	0.694168	0.0844725	0.181707	27.1991	45.1578
Acsm4	0	0	0	0.886237	2.05795	1.95607	2.19829	0.158022	NA	0	1.63342
Acsm5	19.6849	31.0111	25.4223	33.677	35.6711	25.9179	0.30098	0.38806	0.552609	25.3728	31.7553
Acss1	1310.14	1722.15	1752.45	1575.73	1699.87	1480.25	0.00660416	0.956422	0.97474	1594.91	1585.28
Acss2	413.383	709.12	662.676	547.694	482.246	539.874	-0.20631	0.548977	0.697151	595.059	523.272
Acss2os	15.3105	8.26962	1.69482	7.08989	7.54582	3.42312	-0.359168	0.636394	0.767916	8.42497	6.01961
Acss3	188.1	165.392	210.158	289.799	248.326	246.953	0.47318	0.0100635	0.0337891	187.883	261.693
Acta1	26.2465	3795.76	5879.34	534.401	6.85984	236.684	-1.51097	0.169521	0.306591	3233.78	259.315
Acta2	10220.8	12309.3	12560.3	9223.95	8886.92	11445.4	-0.246697	0.0110607	0.0364954	11696.8	9852.1
Actb	17141.2	23485.7	23590.2	24617.9	20974.6	29005	0.223008	0.00160127	0.00761363	21405.7	24865.9
Actbl2	4.37442	4.13481	3.38965	6.20366	2.05795	0.489016	-0.602136	0.586391	NA	3.96629	2.91687
Actc1	4.37442	8.26962	11.8638	2.65871	2.05795	5.8682	-1.18417	0.146232	0.274433	8.16927	3.52829
Actg1	1710.4	2342.37	2496.47	2662.26	2409.86	3484.24	0.393663	7.56174e-10	3.07236e-08	2183.08	2852.12
Actg2	478.999	465.166	577.935	444.891	425.31	479.236	-0.176073	0.218655	0.368977	507.367	449.812
Actl10	2.18721	4.13481	1.69482	0.886237	1.37197	1.46705	-1.03485	0.416367	NA	2.67228	1.24175
Actl6a	697.72	779.412	786.398	777.23	724.399	741.838	-0.0123437	0.89233	0.939175	754.51	747.822
Actl7a	10.936	6.20222	3.38965	4.43118	0	2.9341	-1.55401	0.122951	NA	6.84264	2.45509
Actl9	2.18721	0	5.08447	4.43118	5.48787	1.95607	0.618802	0.594607	NA	2.42389	3.95837
Actn1	1235.77	1114.33	1271.12	1133.5	1020.74	1388.32	-0.0360634	0.769783	0.862675	1207.07	1180.85
Actn2	13.1233	150.921	171.177	32.7908	3.42992	5.8682	-2.25032	0.0425398	0.107255	111.74	14.0296
Actn3	2.18721	566.469	799.956	148.002	0.685984	76.2866	-0.389391	0.759107	0.855605	456.204	74.9914
Actn4	4750.62	5023.79	4684.49	3685.86	3328.39	3339	-0.479737	3.01802e-05	0.000270736	4819.63	3451.09
Actr10	581.798	632.626	596.578	691.265	793.683	739.882	0.296824	0.00457607	0.0179529	603.667	741.61
Actr1a	1076.11	1488.53	1676.18	1469.38	1191.55	1717.91	0.0549852	0.453041	0.615027	1413.61	1459.62
Actr1b	783.021	1048.17	845.717	646.953	583.086	800.031	-0.39277	0.00112454	0.00568674	892.304	676.69
Actr2	2421.24	2540.84	2452.41	4118.34	4367.66	3717.99	0.714283	3.89291e-14	4.87475e-12	2471.5	4068
Actr3	1708.21	1755.23	2057.51	2679.98	2749.42	2557.56	0.532062	6.62479e-07	1.04661e-05	1840.32	2662.32
Actr3b	21.8721	16.5392	44.0654	35.4495	35.6711	34.7202	0.324174	0.325251	0.489157	27.4922	35.2803
Actr5	98.4244	113.707	105.079	66.4678	71.3423	101.226	-0.396107	0.0492206	0.119908	105.737	79.6788
Actr6	111.548	111.64	122.027	130.277	137.883	122.254	0.167118	0.316041	0.479364	115.072	130.138
Actr8	319.333	359.729	347.439	389.058	399.242	346.713	0.135067	0.287911	0.449506	342.167	378.338
Acvr1	334.643	372.133	374.556	384.627	483.618	327.152	0.140027	0.40792	0.572828	360.444	398.466
Acvr1b	573.049	634.693	586.409	592.892	592.69	617.628	0.0120456	0.903295	0.945634	598.05	601.07
Acvr1c	398.072	378.335	462.687	900.416	695.587	795.141	0.949862	1.11653e-06	1.62295e-05	413.031	797.048
Acvr2a	647.414	616.087	630.474	840.152	939.797	637.188	0.329493	0.00358946	0.0147886	631.325	805.713
Acvr2b	41.557	53.7525	44.0654	20.3834	16.4636	28.363	-1.09234	0.00104159	0.00532899	46.4583	21.7367
Acvrl1	450.565	444.492	342.354	231.308	224.317	288.52	-0.713779	4.07202e-05	0.000348115	412.47	248.048
Acy1	122.484	173.662	157.619	130.277	122.105	130.078	-0.239747	0.178844	0.318289	151.255	127.487
Acy3	17.4977	16.5392	18.6431	26.5871	19.8935	29.341	0.522564	0.167908	0.304431	17.56	25.2739
Acyp1	80.9267	90.9658	81.3515	67.354	79.5741	59.66	-0.304882	0.186645	0.328718	84.4147	68.8627
Acyp2	78.7395	78.5614	91.5204	83.3062	63.1105	56.2369	-0.328458	0.12975	0.250812	82.9405	67.5512
Ada	260.278	246.021	327.101	212.697	196.191	227.882	-0.392533	0.0204378	0.0601713	277.8	212.257
Adal	188.1	196.403	157.619	218.014	211.969	192.183	0.200269	0.14283	0.269855	180.707	207.389
Adam10	1367.01	1480.26	1547.37	2150.01	2564.21	1806.43	0.55404	3.33529e-07	5.82989e-06	1464.88	2173.55
Adam11	17.4977	22.7415	13.5586	2.65871	5.48787	7.82426	-1.68321	0.00370037	0.0151679	17.9326	5.32361
Adam12	229.657	198.471	257.613	251.691	205.109	238.64	0.0153264	0.936921	0.964066	228.58	231.813
Adam15	483.373	525.121	493.193	300.434	227.061	350.625	-0.783719	2.02246e-06	2.73668e-05	500.563	292.707
Adam17	684.597	837.299	866.054	1086.53	978.212	1163.86	0.436776	7.72073e-06	8.54088e-05	795.983	1076.2
Adam19	409.008	401.077	354.218	311.069	247.64	286.075	-0.465899	0.00156189	0.00747055	388.101	281.595
Adam1a	52.493	28.9437	47.455	48.743	48.0188	33.7421	-0.00116627	0.996916	0.997994	42.9639	43.5013
Adam21	10.936	4.13481	10.1689	7.08989	16.4636	2.9341	-0.0879643	0.902946	0.945593	8.41326	8.8292
Adam22	129.045	84.7636	98.2997	104.576	113.187	96.3363	0.0233139	0.90373	0.945837	104.036	104.7
Adam23	247.155	299.774	271.172	254.35	209.911	229.349	-0.249976	0.207616	0.3551	272.7	231.203
Adam28	2.18721	0	10.1689	3.54495	6.85984	9.29131	0.659651	0.410248	0.575251	4.11872	6.56537
Adam3	0	2.06741	1.69482	0	0	0.978033	-1.8413	0.304373	NA	1.25408	0.326011
Adam32	0	0	5.08447	3.54495	4.1159	3.42312	0.935679	0.38498	NA	1.69482	3.69465
Adam33	54.6802	45.4829	33.8965	21.2697	17.8356	30.319	-0.942401	0.00577696	0.0216151	44.6865	23.1414
Adam4	131.233	18.6066	61.0136	68.2402	66.5404	26.8959	-0.308829	0.423058	0.587552	70.2843	53.8922
Adam5	0	2.06741	8.47411	3.54495	3.42992	2.44508	-0.19552	0.848529	NA	3.51384	3.13998
Adam7	0	0	1.69482	0.886237	0	0	-1.39893	0.557495	NA	0.564941	0.295412
Adam8	89.6756	82.6962	77.9619	57.6054	87.1199	110.029	0.0362704	0.886026	0.935505	83.4445	84.918
Adam9	1104.54	1329.34	1250.78	1757.41	1824.72	1734.05	0.533077	9.12743e-10	3.55313e-08	1228.22	1772.06
Adamdec1	69.9907	88.8984	69.4877	177.247	187.959	165.777	1.21738	2.02752e-05	0.000193591	76.1256	176.994
Adamts1	293.086	427.953	345.744	281.823	353.282	428.378	-0.00581203	0.979174	0.987773	355.594	354.494
Adamts10	334.643	272.897	262.698	148.002	109.071	177.024	-1.01114	1.6549e-07	3.22473e-06	290.079	144.699
Adamts12	1187.65	1604.31	1396.53	1215.03	1140.79	1294.43	-0.205737	0.181873	0.322142	1396.17	1216.75
Adamts13	6.56163	6.20222	6.77929	1.77247	2.74393	2.44508	-1.46345	0.057605	0.135807	6.51438	2.3205
Adamts14	76.5523	41.3481	61.0136	23.0422	27.4393	28.852	-1.14587	7.82517e-05	0.000609303	59.638	26.4445
Adamts15	531.492	541.66	527.09	369.561	369.745	452.34	-0.427242	0.00778966	0.027496	533.414	397.215
Adamts16	26.2465	6.20222	38.9809	21.2697	26.0674	19.0716	-0.094333	0.856584	0.917834	23.8099	22.1362
Adamts17	65.6163	57.8873	84.7411	59.3779	58.9946	63.5721	-0.202384	0.451045	0.613368	69.4149	60.6482
Adamts18	122.484	99.2355	152.534	133.822	113.873	93.8912	-0.156728	0.373984	0.538132	124.751	113.862
Adamts19	24.0593	8.26962	13.5586	7.08989	16.4636	9.29131	-0.420908	0.452403	0.614444	15.2958	10.9483
Adamts2	612.419	676.042	574.545	430.711	391.011	491.462	-0.508704	3.06145e-05	0.000273827	621.002	437.728
Adamts20	34.9953	22.7415	38.9809	24.8146	22.6375	31.2971	-0.28497	0.389627	0.554013	32.2392	26.2497
Adamts3	133.42	150.921	194.905	231.308	257.93	197.563	0.505738	0.00316878	0.0133913	159.748	228.933
Adamts4	54.6802	57.8873	64.4033	45.1981	42.531	47.9236	-0.385793	0.157456	0.290619	58.9903	45.2176
Adamts5	4619.39	5280.15	3840.47	3715.1	5041.29	2661.23	-0.314112	0.0126869	0.040838	4580	3805.87
Adamts6	67.8035	33.0785	22.0327	47.8568	39.1011	32.7641	0.0550489	0.875786	0.929356	40.9716	39.9073
Adamts7	146.543	121.977	101.689	84.1925	61.0525	91.9351	-0.636364	0.00229025	0.0102544	123.403	79.06
Adamts8	37.1826	41.3481	44.0654	51.4017	27.4393	82.6438	0.34675	0.229619	0.382957	40.8654	53.8283
Adamts9	1076.11	919.995	786.398	962.453	858.851	722.766	-0.132374	0.308194	0.4713	927.5	848.024
Adamtsl1	161.853	196.403	137.281	142.684	113.873	134.48	-0.343384	0.0948473	0.198491	165.179	130.346
Adamtsl2	10.936	4.13481	8.47411	1.77247	2.05795	4.40115	-1.45721	0.0640079	0.147394	7.84832	2.74386
Adamtsl3	89.6756	84.7636	91.5204	73.5576	66.5404	80.1987	-0.27035	0.243265	0.398922	88.6532	73.4323
Adamtsl4	190.287	130.247	172.872	78.8751	88.4919	92.4241	-0.912879	1.10872e-05	0.000115145	164.469	86.597
Adamtsl5	69.9907	51.6851	44.0654	19.4972	19.2075	28.852	-1.24832	0.000131898	0.000942471	55.2471	22.5189
Adap1	30.6209	16.5392	42.3706	23.0422	14.4057	33.2531	-0.365675	0.317097	0.480393	29.8436	23.567
Adap2	122.484	82.6962	96.6049	99.2585	94.6657	104.161	-0.00750607	0.972721	0.983928	100.595	99.3616
Adar	1025.8	913.793	867.749	745.325	775.161	773.624	-0.286173	0.0107166	0.0355599	935.781	764.704
Adarb1	185.913	181.932	140.67	152.433	116.617	134.48	-0.32704	0.0735568	0.163499	169.505	134.51
Adarb2	0	0	0	0	0.685984	0.978033	0.685032	0.73296	NA	0	0.554672
Adat1	102.799	93.0332	113.553	93.9411	91.9218	93.8912	-0.15091	0.420698	0.585391	103.128	93.2513
Adat2	43.7442	28.9437	37.2861	29.2458	40.473	36.6762	-0.0369008	0.915513	0.952226	36.658	35.465
Adat3	43.7442	28.9437	27.1172	13.2936	2.05795	9.78033	-2.02349	2.83414e-05	0.000256196	33.2683	8.37728
Adck1	216.534	235.684	216.937	178.134	158.462	155.996	-0.445217	0.00171061	0.00806077	223.052	164.197
Adck2	199.036	227.415	245.749	226.877	282.625	248.909	0.186978	0.322645	0.486629	224.067	252.804
Adck3	787.395	810.423	649.117	651.384	740.862	528.138	-0.230178	0.102714	0.210625	748.978	640.128
Adck4	150.917	173.662	144.06	109.007	85.062	125.188	-0.550813	0.000862504	0.00455593	156.213	106.419
Adck5	144.356	159.19	150.839	106.348	82.318	131.056	-0.512441	0.00288263	0.0123806	151.462	106.574
Adcy1	8.74884	18.6066	32.2016	38.1082	15.7776	21.0277	0.329839	0.472885	0.632598	19.8524	24.9712
Adcy10	19.6849	14.4718	15.2534	22.1559	24.0094	18.5826	0.394129	0.355965	0.520191	16.47	21.5827
Adcy2	21.8721	31.0111	30.5068	22.1559	25.3814	33.2531	-0.0360621	0.936537	0.963855	27.7967	26.9301
Adcy3	150.917	136.449	137.281	104.576	84.376	106.606	-0.522688	0.00607583	0.0225019	141.549	98.5192
Adcy4	172.79	167.46	133.891	103.69	99.4676	97.3143	-0.652202	0.000264794	0.00170542	158.047	100.157
Adcy5	288.712	299.774	254.223	230.422	207.167	273.849	-0.249095	0.139909	0.265612	280.903	237.146
Adcy6	1148.28	1219.77	1235.53	1042.21	945.971	1200.05	-0.179384	0.0429835	0.108021	1201.19	1062.74
Adcy7	485.56	341.122	335.575	265.871	270.963	244.997	-0.554362	4.89495e-05	0.000407252	387.419	260.611
Adcy8	2.18721	6.20222	5.08447	1.77247	3.42992	2.9341	-0.669599	0.497646	NA	4.4913	2.71216
Adcy9	581.798	752.536	618.61	640.749	568.68	540.852	-0.155314	0.172292	0.310134	650.981	583.427
Adcyap1r1	118.109	177.797	177.956	130.277	112.501	122.743	-0.387385	0.0788256	0.172379	157.954	121.84
Add1	1183.28	1358.29	1410.09	1378.1	1281.42	1557.52	0.0934006	0.254832	0.411616	1317.22	1405.68
Add2	0	4.13481	3.38965	0	0.685984	0.978033	-1.93503	0.184445	NA	2.50815	0.554672
Add3	962.372	1021.3	1008.42	961.567	1049.55	1013.73	0.0143812	0.885082	0.934961	997.363	1008.28
Adgb	13.1233	6.20222	11.8638	10.6348	7.54582	14.6705	0.0736458	0.889144	0.936788	10.3964	10.9504
Adgra1	6.56163	0	3.38965	2.65871	3.42992	2.44508	-0.186684	0.836186	0.905666	3.31709	2.84457
Adgra2	559.926	636.761	569.46	573.395	693.529	724.233	0.17427	0.224368	0.376295	588.716	663.719
Adgra3	179.351	155.055	186.431	83.3062	80.2601	95.8472	-0.999732	1.01844e-07	2.11395e-06	173.612	86.4712
Adgrb2	45.9314	24.8089	23.7275	8.86237	6.17385	16.6266	-1.48956	0.00104347	0.00533505	31.4893	10.5543
Adgrd1	260.278	204.673	267.782	179.906	161.206	188.271	-0.469845	0.00113997	0.00574953	244.244	176.461
Adgre1	334.643	363.863	386.42	331.453	349.166	307.591	-0.145333	0.24796	0.404265	361.642	329.403
Adgre4	54.6802	24.8089	40.6757	44.3118	40.473	33.7421	-0.0133118	0.963544	0.97862	40.0549	39.509
Adgre5	282.15	289.437	298.289	233.08	183.844	241.574	-0.405384	0.0116092	0.0379365	289.959	219.499
Adgrf1	214.347	150.921	113.553	156.864	192.075	148.172	0.0744732	0.761344	0.857007	159.607	165.704
Adgrf2	13.1233	2.06741	8.47411	6.20366	9.60377	11.2474	0.276493	0.673054	0.795237	7.88826	9.01827
Adgrf3	4.37442	4.13481	25.4223	13.2936	10.9757	15.6485	0.360919	0.568467	0.714301	11.3105	13.3059
Adgrf4	8.74884	8.26962	6.77929	8.86237	13.0337	4.40115	0.052941	0.932728	0.961662	7.93258	8.76573
Adgrf5	1806.63	1773.83	1460.94	1791.08	1981.81	1536.49	0.0669529	0.538419	0.689392	1680.47	1769.79
Adgrg1	940.5	1213.57	1052.48	1010.31	876.001	888.543	-0.201655	0.109866	0.221721	1068.85	924.951
Adgrg2	139.981	177.797	171.177	219.787	253.814	183.381	0.42167	0.0287713	0.0792513	162.985	218.994
Adgrg3	30.6209	31.0111	37.2861	26.5871	32.2412	28.852	-0.17784	0.606072	0.743751	32.9727	29.2268
Adgrg5	43.7442	33.0785	28.812	19.4972	32.9272	30.319	-0.314265	0.33103	0.49507	35.2116	27.5811
Adgrg6	139.981	179.864	201.684	190.541	184.53	192.673	0.116492	0.433858	0.598146	173.843	189.248
Adgrg7	4.37442	4.13481	3.38965	2.65871	4.80188	1.95607	-0.40339	0.681583	NA	3.96629	3.13889
Adgrl1	422.131	380.403	328.796	319.045	219.515	276.294	-0.471515	0.00824732	0.0287527	377.11	271.618
Adgrl2	1511.36	1478.19	1225.36	1586.36	1721.13	1195.16	0.0834711	0.442508	0.606404	1404.97	1500.88
Adgrl3	398.072	483.773	440.654	459.957	478.816	404.906	0.0134516	0.91624	0.952447	440.833	447.893
Adgrl4	428.693	514.784	460.992	614.162	632.477	503.198	0.305364	0.0329453	0.087929	468.156	583.279
Adgrv1	6.56163	0	3.38965	7.97613	13.0337	11.2474	1.7284	0.0488577	0.119138	3.31709	10.7524
Adh1	183.726	229.482	172.872	158.636	130.337	167.733	-0.358241	0.0417522	0.105674	195.36	152.235
Adh5	815.829	986.152	952.49	960.681	1029.66	951.626	0.0957054	0.250347	0.406694	918.157	980.656
Adh6-ps1	0	0	0	0.886237	0	2.44508	1.31039	0.479221	NA	0	1.11044
Adh7	32.8081	18.6066	16.9482	20.3834	19.2075	16.6266	-0.23063	0.550519	0.698238	22.7877	18.7392
Adhfe1	356.515	341.122	350.828	451.094	421.88	358.449	0.223317	0.0958243	0.199987	349.488	410.474
Adi1	181.538	277.032	284.73	402.351	477.445	315.416	0.669187	6.34437e-05	0.000508782	247.767	398.404
Adig	371.826	349.391	425.401	228.649	217.457	269.937	-0.678858	8.02029e-07	1.23142e-05	382.206	238.681
Adipoq	2499.98	3096.97	3126.95	3770.05	2755.6	3541.46	0.202726	0.283141	0.444009	2907.97	3355.7
Adipor1	1579.17	2057.07	1910.07	1534.08	1566.1	1526.22	-0.254597	0.00447541	0.0176486	1848.77	1542.13
Adipor2	2318.44	2644.21	2293.1	2899.77	2713.75	2624.06	0.177979	0.0900922	0.191211	2418.58	2745.86
Adk	1135.16	1308.67	1233.83	1537.62	1632.64	1275.84	0.266843	0.00569834	0.0214049	1225.89	1482.04
Adm	41.557	28.9437	40.6757	19.4972	16.4636	29.83	-0.736201	0.0206121	0.0606377	37.0588	21.9303
Adm2	0	2.06741	0	0	1.37197	1.95607	0.735853	0.674557	NA	0.689135	1.10934
Adnp	21.8721	14.4718	25.4223	27.4733	22.6375	18.5826	0.121486	0.787424	0.873576	20.5888	22.8978
Adnp2	308.397	370.066	330.49	372.219	340.934	369.696	0.10372	0.399939	0.564683	336.318	360.95
Ado	395.885	686.379	511.837	739.121	684.612	718.365	0.441015	0.00108083	0.00549847	531.367	714.033
Adora1	63.4291	95.1006	67.7929	93.9411	81.632	93.8912	0.247543	0.291652	0.453248	75.4409	89.8214
Adora2a	39.3698	33.0785	23.7275	21.2697	17.1496	19.0716	-0.721503	0.0362099	0.0946413	32.0586	19.1636
Adora2b	13.1233	4.13481	16.9482	6.20366	6.17385	8.8023	-0.684395	0.240164	0.395322	11.4021	7.05994
Adora3	6.56163	0	3.38965	0	1.37197	0.489016	-2.24189	0.190855	NA	3.31709	0.620328
Adpgk	308.397	334.92	254.223	304.865	279.195	286.075	-0.0377854	0.766848	0.860949	299.18	290.045
Adprh	129.045	206.741	177.956	151.546	154.346	180.936	-0.0625677	0.685755	0.804568	171.247	162.276
Adprhl1	0	4.13481	8.47411	0	0	1.46705	-2.97077	0.0180945	NA	4.20297	0.489016
Adprhl2	133.42	200.538	210.158	96.5998	96.7237	163.332	-0.600603	0.000375343	0.00228815	181.372	118.885
Adprm	109.36	111.64	111.858	129.391	150.916	152.084	0.384147	0.0224539	0.0649306	110.953	144.13
Adra1a	83.114	84.7636	72.8774	120.528	111.129	100.737	0.457273	0.102156	0.209763	80.2517	110.798
Adra1b	0	0	5.08447	0.886237	0.685984	1.46705	-0.740573	0.619097	NA	1.69482	1.01309
Adra1d	10.936	20.6741	6.77929	9.7486	2.74393	6.35721	-1.06872	0.0932939	0.196262	12.7965	6.28325
Adra2a	17.4977	26.8763	18.6431	14.1798	13.0337	25.4289	-0.249362	0.58284	0.725027	21.0057	17.5474
Adra2b	2.18721	2.06741	3.38965	1.77247	2.05795	4.89016	0.213923	0.825969	0.899247	2.54809	2.90686
Adra2c	2.18721	0	0	0	3.42992	0.489016	0.593461	0.714052	NA	0.72907	1.30631
Adrb1	59.0547	66.157	45.7602	38.1082	39.787	25.4289	-0.754567	0.00536176	0.020371	56.9906	34.4414
Adrb2	120.297	90.9658	79.6567	94.8273	106.327	111.007	0.139259	0.511928	0.665594	96.973	104.054
Adrb3	207.785	359.729	296.594	222.445	172.182	203.92	-0.525343	0.0603529	0.140636	288.036	199.516
Adrbk1	1415.12	1509.21	1194.85	1060.83	913.73	1049.92	-0.435595	0.00119999	0.00600468	1373.06	1008.16
Adrbk2	848.637	752.536	676.234	724.942	773.103	772.157	0.00480163	0.959138	0.975939	759.136	756.734
Adrm1	363.077	483.773	389.809	145.343	126.907	221.035	-1.32688	8.58545e-12	6.27559e-10	412.22	164.428
Adsl	535.866	614.019	594.883	414.759	391.011	497.33	-0.416086	1.91846e-05	0.000184445	581.589	434.366
Adss	877.071	1149.48	1196.54	1456.97	1487.21	1483.68	0.480255	0.0211933	0.0620248	1074.36	1475.95
Adssl1	41.557	72.3592	83.0463	42.5394	34.9852	34.2312	-0.779383	0.0373943	0.0971388	65.6542	37.2519
Adtrp	17.4977	18.6066	10.1689	16.8385	18.5216	17.6046	0.236922	0.607064	0.744669	15.4244	17.6549
Aebp1	686.784	1244.58	977.913	448.436	351.224	527.16	-1.13788	2.90237e-09	9.57656e-08	969.758	442.273
Aebp2	807.08	760.805	801.651	1485.33	1262.21	1303.72	0.772786	1.00058e-10	5.53835e-09	789.846	1350.42
Aen	192.474	248.089	196.599	106.348	89.1779	134.48	-0.938875	2.0665e-06	2.77904e-05	212.388	110.002
Aes	1196.4	1753.16	1418.57	806.475	687.355	942.335	-0.834411	7.17895e-10	2.94819e-08	1456.04	812.055
AF251705	63.4291	76.494	55.9292	47.8568	63.1105	72.8635	-0.0732052	0.793469	0.877435	65.2841	61.2769
AF357355	0	2.06741	3.38965	0.886237	0.685984	0	-2.10743	0.198552	NA	1.81902	0.524073
AF357359	24.0593	4.13481	11.8638	8.86237	11.6617	11.2474	-0.194223	0.727817	0.832936	13.3526	10.5905
AF357399	17.4977	10.337	6.77929	9.7486	11.6617	12.2254	0.0465847	0.927994	0.959264	11.538	11.2119
AF357425	2.18721	0	0	0	2.05795	0.489016	0.138395	0.944331	NA	0.72907	0.848989
AF357426	0	0	1.69482	1.77247	0	0	-0.354108	0.883042	NA	0.564941	0.590824
AF529169	15.3105	10.337	16.9482	29.2458	16.4636	17.6046	0.541711	0.238633	0.39337	14.1986	21.1047
Afap1	837.701	767.007	881.308	1008.54	806.717	907.615	0.127882	0.249661	0.406094	828.672	907.623
Afap1l1	192.474	198.471	194.905	138.253	118.675	153.551	-0.512331	0.00165246	0.00782292	195.283	136.826
Afap1l2	120.297	132.314	137.281	103.69	86.4339	96.8253	-0.455952	0.0276477	0.0767396	129.964	95.6496
Aff1	1185.47	1335.54	1257.56	1568.64	1439.19	1444.55	0.240062	0.00374526	0.0152944	1259.52	1484.13
Aff2	8.74884	16.5392	8.47411	3.54495	9.60377	4.89016	-0.90414	0.171623	0.3095	11.2541	6.01296
Aff3	150.917	107.505	111.858	125.846	93.2938	96.8253	-0.225801	0.310141	0.473347	123.427	105.322
Aff4	3162.7	3830.9	3660.82	5073.71	4962.4	4615.83	0.462088	4.1925e-09	1.32606e-07	3551.47	4883.98
Afg3l1	446.191	444.492	440.654	463.502	529.579	568.726	0.236427	0.0331489	0.0883182	443.779	520.602
Afg3l2	594.921	704.985	591.493	780.775	747.722	816.169	0.315253	0.0191078	0.0569914	630.466	781.555
Afmid	63.4291	41.3481	37.2861	40.7669	45.9609	31.2971	-0.257509	0.345829	0.510133	47.3544	39.3416
Aftph	1881	1964.03	1876.17	2158.87	2470.23	2108.64	0.234849	0.00238155	0.0105641	1907.07	2245.91
Aga	183.726	223.28	201.684	152.433	183.158	181.914	-0.227694	0.120063	0.237684	202.896	172.501
Agap1	1445.75	1471.99	1235.53	1245.16	1147.65	1012.26	-0.2858	0.0270119	0.075427	1384.42	1135.03
Agap2	37.1826	33.0785	25.4223	12.4073	13.0337	22.0057	-0.984826	0.0163768	0.0504007	31.8945	15.8156
Agap3	492.122	477.571	472.856	253.464	189.331	313.46	-0.942007	1.12405e-07	2.29268e-06	480.849	252.085
Agbl2	4.37442	6.20222	3.38965	3.54495	3.42992	3.91213	-0.344914	0.684587	NA	4.65543	3.629
Agbl3	83.114	55.8199	67.7929	67.354	83.69	61.6161	0.0384969	0.876127	0.929361	68.9089	70.8867
Agbl4	0	0	3.38965	0	0	0	-3.23249	0.157911	NA	1.12988	0
Agbl5	295.273	227.415	250.834	218.9	212.655	229.838	-0.220376	0.112509	0.225713	257.841	220.464
Ager	32.8081	14.4718	13.5586	6.20366	11.6617	10.7584	-0.989441	0.0333319	0.0886799	20.2795	9.54125
Agfg1	1113.29	1114.33	1345.69	1769.81	1684.78	1490.03	0.470538	0.00149322	0.00719618	1191.1	1648.21
Agfg2	87.4884	132.314	74.5722	105.462	59.6806	103.182	-0.131677	0.633602	0.76591	98.1248	89.4417
Aggf1	457.127	618.154	576.24	722.283	565.25	787.806	0.332875	0.00142082	0.00690609	550.507	691.78
Agk	83.114	107.505	93.2153	127.618	135.139	120.787	0.430298	0.0138083	0.0438474	94.6114	127.848
Agl	691.158	789.749	823.684	795.841	804.659	646.969	-0.0510517	0.727574	0.832782	768.197	749.156
Agmat	4.37442	0	0	0.886237	0.685984	0	-1.10356	0.54314	NA	1.45814	0.524073
Agmo	137.794	144.718	122.027	209.152	206.481	158.441	0.488517	0.00798526	0.0280645	134.847	191.358
Ago1	831.14	870.378	840.632	1089.18	1007.02	1017.15	0.291706	0.0003115	0.00195432	847.383	1037.79
Ago2	857.386	626.424	730.469	808.248	656.486	617.628	-0.0881148	0.48836	0.646282	738.093	694.121
Ago3	697.72	473.436	469.466	607.072	664.718	400.994	0.0149967	0.88622	0.935513	546.874	557.595
Ago4	288.712	233.617	267.782	338.542	342.992	296.344	0.304628	0.0427713	0.107665	263.37	325.959
Agpat1	662.724	853.838	649.117	423.621	371.117	417.131	-0.826205	1.0634e-07	2.19832e-06	721.893	403.956
Agpat2	483.373	578.873	581.324	551.239	352.596	494.396	-0.253325	0.304084	0.46665	547.857	466.077
Agpat3	573.049	870.378	842.327	596.437	603.665	829.861	-0.157451	0.129927	0.251061	761.918	676.655
Agpat4	74.3651	53.7525	57.624	49.6293	48.0188	46.9456	-0.345581	0.176806	0.3158	61.9139	48.1979
Agpat5	220.908	320.448	322.016	435.142	405.416	375.565	0.489043	0.000653257	0.00360412	287.791	405.374
Agpat6	4024.47	4409.78	3386.26	2969.78	3571.92	2816.25	-0.333872	5.94474e-06	6.88819e-05	3940.17	3119.31
Agpat9	190.287	169.527	155.924	445.777	243.524	340.355	0.989415	7.70507e-05	0.000600563	171.913	343.219
Agps	1920.37	1866.87	1971.08	3228.56	3228.24	3173.23	0.741865	3.37146e-19	1.11969e-16	1919.44	3210.01
Agr2	4.37442	4.13481	5.08447	0.886237	2.74393	1.46705	-1.43866	0.123044	NA	4.53123	1.69907
Agrn	2095.35	1784.17	1791.43	1316.06	1180.58	1428.42	-0.530846	0.000153328	0.00107351	1890.32	1308.35
Agrp	4.37442	4.13481	3.38965	3.54495	3.42992	4.40115	-0.0272692	0.976797	NA	3.96629	3.792
Agt	139.981	221.212	220.327	98.3723	83.69	130.078	-0.886196	0.000104964	0.000779552	193.84	104.047
Agtpbp1	524.93	500.312	488.109	581.371	589.946	538.896	0.174219	0.0801569	0.174463	504.45	570.071
Agtr1a	94.05	86.831	116.943	136.48	89.8638	129.589	0.243357	0.29096	0.452638	99.2746	118.645
Agtr2	4.37442	6.20222	1.69482	4.43118	2.05795	2.44508	-0.510196	0.633288	0.76583	4.09049	2.97807
Agtrap	201.223	266.695	230.496	263.212	270.963	252.333	0.167443	0.257518	0.414949	232.805	262.169
Agxt2	6.56163	4.13481	3.38965	4.43118	4.80188	4.40115	-0.00157642	0.998529	0.998755	4.69536	4.54474
Ahctf1	1644.78	1930.96	1767.7	2253.7	2305.59	2247.03	0.350957	1.23729e-05	0.000126435	1781.15	2268.77
Ahcy	164.041	167.46	242.36	140.025	141.313	165.777	-0.363373	0.0183222	0.0551002	191.287	149.038
Ahcyl1	1251.08	1290.06	1488.05	2356.5	2468.85	2302.78	0.820658	3.2107e-17	7.43179e-15	1343.07	2376.05
Ahcyl2	1618.53	2137.7	1376.2	1783.99	2299.42	1755.57	0.187963	0.179547	0.319084	1710.81	1946.33
Ahdc1	529.305	471.368	474.55	207.379	151.602	241.085	-1.30745	3.16316e-13	3.26511e-11	491.741	200.022
Ahi1	67.8035	68.2244	54.2343	54.9467	75.4582	62.5941	0.0320478	0.892764	0.939438	63.4207	64.333
Ahnak	19378.7	19700.3	19636.2	21958.3	21898.7	20476.6	0.129181	0.208898	0.356585	19571.7	21444.5
Ahr	406.821	467.234	608.441	888.009	860.223	1043.07	0.928438	4.35477e-12	3.30984e-10	494.165	930.435
Ahrr	4.37442	4.13481	1.69482	5.31742	6.85984	7.33525	1.01177	0.212202	0.360552	3.40135	6.50417
Ahsa1	748.026	977.883	827.074	771.912	716.853	771.668	-0.171679	0.0804797	0.174941	850.994	753.478
Ahsa2	236.219	217.078	223.717	286.254	288.799	283.141	0.34281	0.00585596	0.0218625	225.671	286.065
AI118078	4.37442	4.13481	1.69482	0	0	1.95607	-2.61642	0.0566718	NA	3.40135	0.652022
AI182371	6.56163	6.20222	5.08447	3.54495	8.91779	3.42312	-0.19573	0.793426	0.877435	5.94944	5.29528
AI197445	4.37442	2.06741	3.38965	7.08989	6.85984	2.44508	0.68193	0.441121	0.605154	3.27716	5.46494
AI314180	2285.63	2290.69	2301.57	2992.82	3329.08	2620.15	0.370729	4.3974e-06	5.28137e-05	2292.63	2980.68
AI317395	0	2.06741	1.69482	6.20366	2.74393	0.978033	1.19829	0.373787	NA	1.25408	3.30854
AI413582	54.6802	49.6177	55.9292	25.7009	31.5552	37.1653	-0.750635	0.0101355	0.0339858	53.409	31.4738
AI414108	26.2465	24.8089	25.4223	33.677	24.6954	27.3849	0.156232	0.678107	0.79869	25.4926	28.5858
AI427809	0	4.13481	3.38965	6.20366	6.85984	4.89016	1.20546	0.196724	0.341879	2.50815	5.98455
AI429214	34.9953	33.0785	54.2343	59.3779	60.3665	53.7918	0.486062	0.110126	0.222069	40.7694	57.8454
AI450353	21.8721	10.337	6.77929	12.4073	13.7197	13.2034	0.230776	0.690642	0.808205	12.9961	13.1101
AI463170	76.5523	82.6962	83.0463	55.8329	50.7628	57.2149	-0.55765	0.0165583	0.0508765	80.765	54.6035
AI464131	150.917	183.999	186.431	154.205	167.38	198.052	0.00655423	0.966873	0.980274	173.782	173.212
AI467606	34.9953	14.4718	42.3706	22.1559	22.6375	17.6046	-0.588612	0.0913344	0.19315	30.6126	20.7993
AI504432	24.0593	8.26962	18.6431	22.1559	15.0916	15.6485	0.0391091	0.92933	0.959801	16.9907	17.632
AI506816	43.7442	51.6851	79.6567	54.0604	54.1927	60.638	-0.0574462	0.808527	0.887523	58.362	56.2971
AI507597	4.37442	2.06741	5.08447	0.886237	2.05795	1.46705	-1.38785	0.189718	NA	3.8421	1.47041
AI597479	310.584	322.515	367.777	451.981	444.517	433.758	0.403562	0.000245734	0.00160089	333.625	443.419
AI606473	6.56163	10.337	3.38965	7.97613	5.48787	10.2693	0.268507	0.670644	0.794034	6.76277	7.91111
AI607873	214.347	215.01	201.684	226.877	214.027	206.365	0.0341531	0.845162	0.911574	210.347	215.756
AI661453	212.159	206.741	164.398	144.457	137.197	126.166	-0.507642	0.0166772	0.0511498	194.433	135.94
AI662270	52.493	41.3481	23.7275	39.8807	61.0525	42.5444	0.315568	0.327269	0.49137	39.1895	47.8259
AI837181	100.612	165.392	172.872	101.031	83.69	125.677	-0.490703	0.00892463	0.0306868	146.292	103.466
AI839979	6.56163	4.13481	8.47411	8.86237	11.6617	3.42312	0.185198	0.784103	0.871762	6.39018	7.9824
AI846148	269.027	239.819	222.022	136.48	121.419	164.799	-0.782243	1.21465e-06	1.75058e-05	243.623	140.899
AI854703	4.37442	6.20222	3.38965	0.886237	3.42992	2.44508	-1.01558	0.325418	NA	4.65543	2.25375
AI987944	190.287	177.797	161.008	189.655	216.085	146.216	0.043997	0.778423	0.867578	176.364	183.985
Aida	277.776	266.695	298.289	334.997	332.016	323.729	0.22763	0.0441775	0.11026	280.92	330.247
Aif1	63.4291	74.4266	81.3515	103.69	104.269	111.985	0.541239	0.00537625	0.0204057	73.0691	106.648
Aif1l	41.557	33.0785	57.624	53.1742	43.217	37.6543	-0.0138678	0.961749	0.977489	44.0865	44.6818
Aifm1	459.314	568.536	498.278	701.013	657.172	678.755	0.420102	0.00120122	0.00600884	508.709	678.98
Aifm2	345.579	339.054	342.354	321.704	293.601	328.13	-0.123506	0.337632	0.50185	342.329	314.478
Aifm3	34.9953	33.0785	27.1172	19.4972	13.7197	17.1156	-0.918163	0.0151834	0.0473479	31.7303	16.7775
Aig1	124.671	136.449	154.229	133.822	151.602	138.881	0.0260723	0.882711	0.933133	138.45	141.435
Aim1	1288.27	1277.66	1640.59	1834.51	1717.7	1965.36	0.394127	0.000252732	0.00164208	1402.17	1839.19
Aim1l	19.6849	24.8089	20.3379	13.2936	13.0337	26.4069	-0.272776	0.486044	0.64467	21.6105	17.578
Aim2	26.2465	45.4829	42.3706	44.3118	48.7048	52.8138	0.369687	0.217634	0.367657	38.0333	48.6101
Aimp1	583.985	682.244	667.76	704.558	781.335	734.014	0.200114	0.0376778	0.0977256	644.663	739.969
Aimp2	216.534	258.426	269.477	165.726	169.438	209.299	-0.443285	0.00149025	0.00718412	248.145	181.488
Aip	223.095	198.471	193.21	129.391	106.327	126.655	-0.756545	8.00732e-05	0.000621901	204.925	120.791
Aipl1	0	0	3.38965	1.77247	2.05795	2.44508	0.987293	0.469939	NA	1.12988	2.09184
Aire	4.37442	2.06741	3.38965	0.886237	1.37197	1.95607	-1.23768	0.280029	NA	3.27716	1.40476
Airn	323.707	97.168	110.163	132.049	136.511	73.8415	-0.51488	0.043359	0.108868	177.013	114.134
Ajuba	244.967	283.235	301.678	261.44	209.225	338.399	-0.0440217	0.738576	0.840561	276.627	269.688
AK010878	63.4291	62.0222	62.7084	63.809	83.69	78.7317	0.276487	0.210533	0.358523	62.7199	75.4102
Ak1	50.3058	181.932	228.801	44.3118	32.2412	45.4785	-1.76056	4.77827e-06	5.68517e-05	153.68	40.6772
Ak2	990.806	1176.35	1064.35	954.477	817.006	1097.84	-0.16979	0.092806	0.195504	1077.17	956.442
Ak3	1305.76	1600.17	1589.74	2177.48	2307.65	2092.99	0.556382	2.35688e-09	7.96593e-08	1498.56	2192.71
Ak4	45.9314	62.0222	72.8774	68.2402	62.4245	72.8635	0.159016	0.535121	0.686056	60.277	67.8427
Ak5	19.6849	10.337	13.5586	15.066	11.6617	12.2254	-0.162036	0.724368	0.830607	14.5268	12.9844
Ak6	135.607	113.707	177.956	130.277	152.974	154.529	0.0255062	0.886748	0.935702	142.424	145.927
Ak7	4.37442	4.13481	3.38965	4.43118	5.48787	1.95607	-0.0886973	0.917926	NA	3.96629	3.95837
Ak8	0	6.20222	1.69482	1.77247	1.37197	1.46705	-0.814969	0.509873	NA	2.63235	1.53716
Akap1	1758.52	1935.09	1623.64	1511.92	1500.93	1589.3	-0.199734	0.02371	0.0679072	1772.42	1534.05
Akap10	601.483	580.941	581.324	697.468	713.423	556.99	0.143841	0.119723	0.237132	587.916	655.96
Akap11	1386.69	1374.82	1179.6	1744.11	1802.76	1246.01	0.267474	0.016092	0.0497145	1313.7	1597.63
Akap12	621.167	597.48	560.986	565.419	562.506	609.804	-0.0341588	0.806484	0.886341	593.211	579.243
Akap13	1367.01	1145.34	1138.92	1378.1	1273.19	1223.03	0.0861251	0.336442	0.500274	1217.09	1291.44
Akap14	6.56163	6.20222	1.69482	2.65871	4.80188	1.95607	-0.602734	0.493588	NA	4.81956	3.13889
Akap17b	314.958	297.706	267.782	338.542	364.943	269.937	0.133848	0.262082	0.420216	293.482	324.474
Akap2	4.37442	0	1.69482	1.77247	0	0.489016	-1.17279	0.514484	NA	2.02308	0.75383
Akap5	30.6209	26.8763	25.4223	23.0422	21.9515	15.6485	-0.477292	0.258219	0.415724	27.6398	20.2141
Akap6	21.8721	28.9437	32.2016	22.1559	24.0094	23.4728	-0.260336	0.462494	0.623227	27.6725	23.2127
Akap7	168.415	204.673	198.294	211.811	238.722	201.475	0.180827	0.301538	0.46412	190.461	217.336
Akap8	1358.26	1199.1	1054.18	1275.29	1144.22	1391.25	0.0841184	0.43622	0.600372	1203.84	1270.26
Akap8l	529.305	442.425	415.232	372.219	333.388	416.153	-0.29678	0.025234	0.071336	462.32	373.92
Akap9	2937.42	2881.96	2787.98	4246.85	4033.58	3467.62	0.446578	6.5587e-08	1.43139e-06	2869.12	3916.02
Akip1	69.9907	117.842	89.8256	90.3961	124.163	117.364	0.289446	0.184708	0.326105	92.5528	110.641
Akirin1	339.017	442.425	394.894	399.693	400.614	402.461	0.0299032	0.847833	0.912911	392.112	400.923
Akirin2	323.707	353.526	394.894	423.621	447.261	425.444	0.268505	0.0648034	0.148805	357.376	432.109
Akna	229.657	165.392	161.008	103.69	100.84	127.144	-0.734914	0.00145225	0.00704096	185.353	110.558
Aknad1	2.18721	2.06741	5.08447	2.65871	5.48787	1.46705	-0.153707	0.8788	NA	3.11303	3.20454
Akr1a1	2694.64	2933.65	3021.87	2820.01	2872.9	3015.28	0.0111512	0.850913	0.914677	2883.39	2902.73
Akr1b10	242.78	285.302	306.763	264.985	305.949	268.959	0.00105366	0.993532	0.996075	278.282	279.964
Akr1b8	63.4291	43.4155	79.6567	46.0843	67.2264	66.5062	-0.0471909	0.853144	0.916045	62.1671	59.939
Akr1c12	0	2.06741	3.38965	4.43118	4.80188	0.978033	0.60601	0.587893	NA	1.81902	3.4037
Akr1c13	30.6209	8.26962	25.4223	18.611	18.5216	19.5607	-0.155091	0.693286	0.810044	21.4376	18.8977
Akr1c14	168.415	136.449	186.431	198.517	166.694	142.793	0.030008	0.862927	0.921709	163.765	169.335
Akr1c18	21.8721	18.6066	45.7602	20.3834	36.3571	10.2693	-0.545722	0.245466	0.401411	28.7463	22.3366
Akr1c19	0	2.06741	1.69482	2.65871	0.685984	0	-0.0863942	0.957681	NA	1.25408	1.1149
Akr1c21	8.74884	2.06741	10.1689	15.9523	9.60377	3.91213	0.388359	0.605005	0.742979	6.99506	9.82272
Akr1cl	19.6849	74.4266	76.267	26.5871	41.159	38.6323	-0.590012	0.480987	0.640491	56.7928	35.4595
Akr1e1	264.652	256.358	249.139	268.53	268.906	268.47	0.0673541	0.646865	0.775984	256.717	268.635
Akr7a5	177.164	270.83	237.275	130.277	126.221	169.689	-0.668625	6.78948e-05	0.000540505	228.423	142.062
Akt1	3678.89	4289.87	2860.86	1802.61	1534.55	1996.65	-0.994966	1.03883e-07	2.15335e-06	3609.87	1777.93
Akt1s1	354.328	380.403	322.016	154.205	113.187	186.804	-1.22152	2.41163e-14	3.12224e-12	352.249	151.399
Akt2	597.108	826.962	605.052	494.52	403.358	522.759	-0.516044	0.00157451	0.00752387	676.374	473.546
Akt3	395.885	332.852	427.095	462.616	483.618	420.554	0.230833	0.0401203	0.102709	385.277	455.596
Aktip	492.122	479.638	535.564	687.72	773.789	726.19	0.538264	1.00505e-05	0.000106478	502.441	729.233
Alad	312.771	386.605	344.049	197.631	182.472	244.508	-0.739326	0.00126596	0.00628332	347.808	208.204
Alas1	708.656	762.873	779.619	613.276	480.874	684.623	-0.343655	0.00961614	0.0325589	750.382	592.924
Alas2	142.169	223.28	167.787	131.163	109.757	106.117	-0.626882	0.00236055	0.0104862	177.745	115.679
Alb	32.8081	18.6066	28.812	42.5394	47.3329	57.2149	0.880159	0.038147	0.098636	26.7423	49.0291
Alcam	476.812	475.503	493.193	596.437	620.129	619.095	0.341296	0.00125642	0.00624064	481.836	611.887
Aldh16a1	352.141	407.279	340.659	161.295	115.931	188.271	-1.25126	5.12608e-13	4.98797e-11	366.693	155.166
Aldh18a1	2569.97	2832.35	2071.07	1970.99	1708.78	1567.3	-0.496574	5.97735e-05	0.00048495	2491.13	1749.02
Aldh1a1	236.219	388.672	354.218	323.476	255.186	307.102	-0.137797	0.468144	0.628126	326.37	295.255
Aldh1a2	2.18721	6.20222	8.47411	5.31742	9.60377	7.82426	0.382865	0.582193	0.724753	5.62118	7.58182
Aldh1a3	389.323	336.987	366.082	231.308	261.36	241.085	-0.57963	0.120471	0.238091	364.131	244.584
Aldh1a7	104.986	146.786	167.787	235.739	207.853	277.272	0.772413	0.00173463	0.00815886	139.853	240.288
Aldh1b1	0	16.5392	11.8638	6.20366	4.80188	17.1156	0.0359696	0.955719	0.974472	9.46767	9.37371
Aldh1l1	295.273	458.964	313.542	309.297	192.761	348.18	-0.358115	0.0988827	0.204673	355.926	283.413
Aldh1l2	150.917	88.8984	113.553	108.121	124.163	133.502	0.0682114	0.714517	0.824883	117.79	121.928
Aldh2	1242.33	1635.32	1389.75	958.908	773.103	1222.05	-0.539421	0.000510554	0.00293554	1422.47	984.688
Aldh3a1	0	0	3.38965	0	0.685984	1.46705	-0.673586	0.710059	NA	1.12988	0.717678
Aldh3a2	500.871	713.255	662.676	814.452	734.002	742.816	0.304423	0.0148223	0.0464867	625.6	763.757
Aldh3b1	59.0547	39.2807	50.8447	32.7908	37.7291	36.1872	-0.474324	0.0883225	0.188213	49.7267	35.569
Aldh3b2	28.4337	53.7525	44.0654	39.8807	36.3571	40.5884	-0.0989463	0.740407	0.841856	42.0839	38.942
Aldh4a1	367.451	413.481	303.373	241.056	249.012	251.354	-0.547699	0.0258379	0.0726935	361.435	247.141
Aldh5a1	155.292	200.538	210.158	259.667	264.104	277.272	0.506623	0.000387919	0.00234981	188.663	267.014
Aldh6a1	1552.92	1798.64	1511.78	2352.96	2293.24	1808.87	0.396095	0.000221326	0.00147293	1621.11	2151.69
Aldh7a1	726.153	862.108	808.431	652.27	624.931	767.756	-0.227016	0.0329526	0.0879331	798.897	681.652
Aldh9a1	988.619	1066.78	969.439	1007.65	1155.88	833.284	-0.0281964	0.808584	0.887523	1008.28	998.939
Aldoa	3263.32	6138.13	6111.53	3064.61	2483.26	3520.43	-0.74282	4.57701e-06	5.45847e-05	5170.99	3022.77
Aldob	2.18721	0	0	4.43118	1.37197	0.978033	1.57533	0.297219	NA	0.72907	2.26039
Aldoc	3210.82	3216.88	2279.54	1582.82	1820.6	1636.74	-0.768895	4.24688e-07	7.17695e-06	2902.41	1680.05
Alg1	177.164	190.201	149.144	120.528	115.931	146.216	-0.414779	0.0104068	0.0347226	172.17	127.558
Alg10b	481.186	620.222	591.493	989.04	934.996	845.021	0.705668	5.53203e-11	3.32728e-09	564.3	923.019
Alg11	590.547	688.446	596.578	641.635	777.905	633.765	0.125324	0.246851	0.40303	625.19	684.435
Alg12	148.73	132.314	154.229	132.936	139.255	113.452	-0.189685	0.288533	0.450005	145.091	128.547
Alg13	214.347	144.718	142.365	180.792	214.713	176.046	0.205841	0.175952	0.314757	167.143	190.517
Alg14	185.913	260.493	277.951	296.889	347.108	306.613	0.390482	0.00847245	0.02939	241.452	316.87
Alg2	310.584	314.246	310.153	340.315	339.562	252.822	-0.0248334	0.864357	0.922535	311.661	310.899
Alg3	74.3651	142.651	110.163	95.7136	78.8881	77.2646	-0.374923	0.0853766	0.183188	109.06	83.9554
Alg5	531.492	489.975	464.381	494.52	628.361	566.281	0.190505	0.0963086	0.200669	495.283	563.054
Alg6	201.223	150.921	201.684	196.745	190.017	191.694	0.0593694	0.707868	0.819871	184.609	192.819
Alg8	135.607	157.123	135.586	204.721	206.481	206.854	0.534885	0.000431605	0.00256529	142.772	206.019
Alg9	336.83	427.953	391.504	416.531	439.029	401.972	0.122439	0.318226	0.481721	385.429	419.177
Alkbh1	378.387	291.504	299.984	233.08	277.137	262.113	-0.317157	0.020413	0.0601329	323.292	257.443
Alkbh2	54.6802	53.7525	74.5722	27.4733	25.3814	43.0335	-0.935142	0.00802893	0.0281778	61.0017	31.9627
Alkbh3	273.401	241.886	274.561	198.517	256.558	239.618	-0.181342	0.196297	0.341513	263.283	231.564
Alkbh4	59.0547	53.7525	64.4033	46.9705	41.159	46.9456	-0.396777	0.117182	0.233068	59.0702	45.025
Alkbh5	1095.79	1323.14	1286.37	1489.76	1570.22	1395.16	0.264972	0.00288507	0.0123877	1235.1	1485.05
Alkbh6	98.4244	157.123	108.469	73.5576	76.8302	103.182	-0.50329	0.0161951	0.0499522	121.339	84.5234
Alkbh7	65.6163	41.3481	49.1499	35.4495	30.1833	39.6103	-0.547068	0.0665089	0.151877	52.0381	35.081
Alkbh8	249.342	206.741	276.256	336.77	412.962	297.322	0.497554	0.00107935	0.00549274	244.113	349.018
Alms1	614.606	498.245	542.343	601.755	750.466	487.06	0.135896	0.262081	0.420216	551.731	613.094
Alms1-ps2	8.74884	10.337	3.38965	9.7486	12.3477	6.35721	0.360703	0.598261	0.737543	7.49184	9.48451
Alox12	26.2465	16.5392	47.455	23.0422	24.6954	24.9398	-0.334256	0.348308	0.512433	30.0803	24.2258
Alox12e	48.1186	41.3481	84.7411	76.2164	49.3908	133.012	0.441556	0.545339	0.694551	58.0693	86.2066
Alox15	83.114	74.4266	103.384	78.8751	66.5404	88.512	-0.165025	0.600364	0.73942	86.9749	77.9758
Alox5	26.2465	22.7415	23.7275	22.1559	21.9515	18.5826	-0.222695	0.523798	0.675684	24.2385	20.8967
Alox5ap	83.114	49.6177	76.267	45.1981	61.7385	47.9236	-0.429843	0.0672039	0.153006	69.6662	51.6201
Alox8	4.37442	4.13481	3.38965	4.43118	4.1159	2.9341	-0.0628239	0.941657	0.966326	3.96629	3.82706
Aloxe3	0	0	0	1.77247	1.37197	0.489016	1.59114	0.324593	NA	0	1.21115
Alpk1	137.794	97.168	69.4877	83.3062	89.1779	80.6877	-0.228333	0.260391	0.418081	101.483	84.3906
Alpk2	2.18721	12.4044	37.2861	2.65871	0	0.489016	-3.64482	0.003725	0.0152374	17.2926	1.04924
Alpk3	0	53.7525	86.436	15.9523	0.685984	9.29131	-1.28765	0.253736	0.410411	46.7295	8.64319
Alpl	328.081	403.144	384.725	285.368	303.891	358.938	-0.230992	0.0794538	0.173501	371.983	316.066
Als2	332.456	363.863	330.49	346.519	334.76	344.268	-0.000821112	0.994139	0.996487	342.27	341.849
Als2cl	413.383	345.257	286.425	259.667	235.292	337.421	-0.337207	0.0539041	0.128691	348.355	277.46
Als2cr12	10.936	10.337	13.5586	21.2697	18.5216	27.3849	0.942083	0.045988	0.113536	11.6106	22.3921
Alx4	74.3651	68.2244	89.8256	46.9705	32.2412	52.8138	-0.82722	0.00023943	0.00156717	77.4717	44.0085
Alyref	402.447	489.975	537.259	518.448	445.203	604.424	0.133532	0.283296	0.444207	476.56	522.692
Alyref2	28.4337	35.1459	27.1172	27.4733	26.7534	30.808	-0.0792447	0.80651	0.886341	30.2323	28.3449
Amacr	109.36	88.8984	116.943	100.145	117.989	90.4681	-0.0490918	0.787516	0.873576	105.067	102.867
Ambra1	638.665	576.806	652.507	651.384	650.998	600.023	0.0221649	0.823628	0.8976	622.659	634.135
Amdhd2	277.776	334.92	288.12	109.007	107.699	190.716	-1.1608	2.64939e-10	1.26483e-08	300.272	135.808
Amelx	17.4977	2.06741	6.77929	7.97613	10.2898	4.40115	-0.13404	0.850482	0.914279	8.78146	7.55568
Amer1	608.044	678.109	676.234	904.848	852.677	850.889	0.413934	8.9559e-05	0.00068205	654.129	869.471
Amer2	2.18721	4.13481	3.38965	4.43118	7.54582	2.9341	0.541015	0.55629	NA	3.23722	4.97037
Amfr	1200.78	1670.46	1469.41	1664.35	1754.75	1758.5	0.260681	0.0143768	0.0453042	1446.88	1725.87
Amh	6.56163	2.06741	1.69482	0	0	0.978033	-3.13758	0.0226027	NA	3.44129	0.326011
Amhr2	0	4.13481	6.77929	4.43118	2.74393	1.95607	-0.343505	0.725086	NA	3.63803	3.04373
Amica1	28.4337	14.4718	20.3379	16.8385	11.6617	13.6925	-0.580363	0.16107	0.295292	21.0811	14.0642
Amigo1	164.041	198.471	216.937	202.948	206.481	231.305	0.145801	0.271069	0.430023	193.15	213.578
Amigo2	406.821	620.222	640.643	597.324	856.793	733.036	0.435052	0.0158981	0.049225	555.895	729.051
Amigo3	181.538	130.247	101.689	83.3062	59.6806	63.5721	-0.939858	0.000471933	0.00275706	137.825	68.853
Ammecr1	614.606	616.087	511.837	757.732	872.571	525.693	0.280846	0.0136022	0.043337	580.843	718.665
Ammecr1l	975.495	1035.77	1011.81	1308.97	1384.31	1059.7	0.30186	0.00192899	0.00890277	1007.69	1251
Amn	4.37442	8.26962	1.69482	1.77247	1.37197	1.95607	-1.47515	0.15683	NA	4.77962	1.70017
Amn1	98.4244	80.6288	93.2153	130.277	126.221	118.342	0.457668	0.0276725	0.0767944	90.7562	124.947
Amot	618.98	659.502	747.417	960.681	856.107	852.845	0.405583	0.00425951	0.0169902	675.3	889.878
Amotl1	2974.6	3605.55	3406.59	3622.05	2824.19	3584	0.00663302	0.937868	0.964511	3328.92	3343.42
Amotl2	505.245	684.311	637.253	554.784	465.783	685.601	-0.10187	0.431132	0.595281	608.937	568.723
Ampd1	0	57.8873	88.1308	28.3596	0.685984	12.2254	0.531039	0.733675	0.837205	48.6727	13.757
Ampd2	367.451	388.672	354.218	238.398	181.786	252.822	-0.721349	0.000138027	0.000979082	370.114	224.335
Ampd3	137.794	103.37	94.9101	104.576	103.584	88.023	-0.174955	0.342223	0.506064	112.025	98.7275
Amph	17.4977	12.4044	13.5586	6.20366	6.85984	8.8023	-0.960893	0.0817408	0.177044	14.4869	7.2886
Amt	393.698	456.897	576.24	451.094	407.474	473.857	-0.0936754	0.497398	0.652982	475.611	444.142
Amy1	290.899	394.874	398.283	716.965	600.236	536.94	0.76664	9.58002e-05	0.000721667	361.352	618.047
Amz1	59.0547	57.8873	55.9292	31.0183	28.8113	35.2092	-0.854434	0.00108423	0.00551024	57.6237	31.6796
Amz2	371.826	446.56	449.128	524.652	501.454	524.226	0.288909	0.00327964	0.0137835	422.504	516.777
Anapc1	1614.16	1908.22	1940.57	2131.4	2240.42	2051.42	0.231869	0.00891198	0.0306571	1820.98	2141.08
Anapc10	170.602	171.595	138.975	163.068	172.868	142.793	-0.00810296	0.959942	0.976367	160.391	159.576
Anapc11	124.671	171.595	183.041	107.235	118.675	122.743	-0.455107	0.00488062	0.0189098	159.769	116.218
Anapc13	207.785	212.943	247.444	218.014	186.588	246.464	-0.0387943	0.803128	0.883835	222.724	217.022
Anapc15	312.771	237.752	227.106	199.403	179.042	177.024	-0.477029	0.000558119	0.00316261	259.21	185.156
Anapc16	295.273	299.774	289.815	234.853	246.268	243.53	-0.285493	0.0186995	0.0559484	294.954	241.55
Anapc2	527.117	502.379	562.681	680.63	602.294	694.892	0.311361	0.00556494	0.0210122	530.726	659.272
Anapc4	772.085	826.962	847.411	1012.97	943.913	997.594	0.272183	0.00741983	0.0264225	815.486	984.825
Anapc5	2119.41	2520.17	2465.97	2410.56	2309.02	2601.08	0.0470524	0.428702	0.59268	2368.51	2440.22
Anapc7	317.145	388.672	435.569	446.663	381.407	506.132	0.225679	0.0326349	0.0873448	380.462	444.734
Ang	43.7442	26.8763	38.9809	31.0183	28.1253	25.9179	-0.367901	0.229085	0.382233	36.5338	28.3538
Angel1	109.36	155.055	142.365	149.774	143.371	142.793	0.11164	0.529481	0.680462	135.594	145.312
Angel2	468.063	448.627	488.109	710.762	712.051	671.909	0.573776	1.01782e-07	2.11395e-06	468.266	698.24
Angpt1	1909.43	1852.4	799.956	1190.22	1928.3	826.927	-0.234688	0.196877	0.3419	1520.6	1315.15
Angpt2	247.155	183.999	191.515	143.57	145.429	131.056	-0.560072	0.000254019	0.00164833	207.556	140.018
Angpt4	2.18721	0	3.38965	2.65871	1.37197	1.95607	0.0550204	0.965784	NA	1.85895	1.99558
Angptl1	15.3105	16.5392	13.5586	15.9523	15.0916	12.2254	-0.0855233	0.860291	0.920427	15.1361	14.4231
Angptl2	645.227	907.591	794.872	555.67	434.228	527.16	-0.639273	0.000305837	0.00192751	782.563	505.686
Angptl3	30.6209	22.7415	13.5586	27.4733	33.6132	16.6266	0.211951	0.603659	0.742102	22.307	25.9044
Angptl4	1395.44	1139.14	1762.62	1581.93	3285.18	2217.2	0.722703	0.0518405	0.125074	1432.4	2361.44
Angptl6	8.74884	6.20222	6.77929	3.54495	1.37197	1.95607	-1.72348	0.0610835	NA	7.24345	2.29099
Angptl7	39.3698	16.5392	13.5586	12.4073	17.1496	12.2254	-0.662083	0.158319	0.29179	23.1559	13.9274
Ank	153.105	179.864	157.619	202.948	170.81	182.403	0.168806	0.36766	0.531749	163.529	185.387
Ank1	10.936	24.8089	45.7602	11.5211	11.6617	7.33525	-1.3234	0.0157725	0.0488922	27.1684	10.1727
Ank2	172.79	190.201	161.008	217.128	154.346	205.387	0.130474	0.508318	0.662112	174.666	192.287
Ank3	754.587	835.232	933.847	985.495	979.584	876.318	0.177191	0.13793	0.262719	841.222	947.132
Ankdd1b	45.9314	24.8089	30.5068	23.9284	25.3814	22.0057	-0.487864	0.156945	0.290054	33.749	23.7718
Ankef1	19.6849	22.7415	22.0327	36.3357	41.159	45.4785	0.945378	0.00776442	0.0274323	21.4863	40.9911
Ankfy1	1334.2	1225.97	1428.74	1706.89	1618.24	1561.92	0.289175	0.000312449	0.00195596	1329.63	1629.02
Ankhd1	2370.93	2176.98	1954.13	2838.62	2821.45	2280.28	0.284949	0.000362592	0.00221661	2167.35	2646.78
Ankib1	929.564	903.456	921.984	1230.98	1152.45	1087.57	0.329648	0.000168406	0.00116678	918.335	1157
Ankk1	2.18721	0	0	1.77247	0	0.978033	0.442111	0.801858	NA	0.72907	0.916835
Ankle1	67.8035	28.9437	28.812	31.0183	30.8693	46.9456	-0.139942	0.666379	0.790701	41.8531	36.2777
Ankle2	778.647	882.782	959.27	1061.71	1257.41	1140.88	0.403346	0.000320724	0.00199662	873.566	1153.33
Ankmy1	4.37442	10.337	3.38965	0.886237	6.17385	5.37918	-0.445138	0.589052	0.730315	6.0337	4.14642
Ankmy2	297.46	386.605	367.777	397.034	449.319	420.065	0.269254	0.0308172	0.0835927	350.614	422.139
Ankra2	157.479	161.258	144.06	202.062	230.49	201.964	0.458669	0.00283299	0.012219	154.266	211.505
Ankrd1	0	2.06741	5.08447	2.65871	1.37197	2.44508	0.103087	0.939729	NA	2.38396	2.15859
Ankrd10	496.497	425.885	423.706	502.496	465.783	555.034	0.184844	0.0916536	0.193637	448.696	507.771
Ankrd11	1848.19	1933.02	1623.64	1821.22	1470.06	1926.24	-0.0496757	0.697306	0.812683	1801.62	1739.17
Ankrd12	708.656	603.682	511.837	880.033	790.939	727.657	0.400802	0.000130305	0.000934146	608.058	799.543
Ankrd13a	1095.79	1290.06	1077.91	1027.15	880.117	1102.24	-0.197625	0.0734067	0.163236	1154.59	1003.17
Ankrd13b	142.169	144.718	125.417	91.2824	73.4002	136.925	-0.468512	0.0209585	0.0614909	137.435	100.536
Ankrd13c	446.191	527.188	494.888	729.373	711.365	635.721	0.493203	9.92046e-07	1.47858e-05	489.422	692.153
Ankrd13d	80.9267	99.2355	55.9292	66.4678	54.1927	47.4346	-0.489351	0.0448821	0.111487	78.6971	56.0317
Ankrd16	251.529	206.741	189.82	186.996	185.216	158.441	-0.287195	0.0650488	0.149207	216.03	176.884
Ankrd17	2653.08	2631.81	2513.42	3527.22	3335.94	2889.6	0.318716	0.000683726	0.00373713	2599.44	3250.92
Ankrd2	6.56163	6.20222	22.0327	5.31742	4.1159	8.31328	-0.977638	0.131949	0.254037	11.5988	5.91553
Ankrd22	199.036	223.28	240.665	259.667	267.534	264.558	0.266607	0.35189	0.516063	220.994	263.92
Ankrd23	61.2419	90.9658	135.586	70.0127	31.5552	48.4126	-0.881572	0.139987	0.265728	95.9312	49.9935
Ankrd24	192.474	163.325	145.755	109.893	102.212	134.48	-0.52096	0.00635477	0.0233258	167.185	115.528
Ankrd26	225.283	206.741	181.346	208.266	188.645	183.87	-0.0759395	0.609618	0.746934	204.456	193.594
Ankrd27	487.748	527.188	622	479.454	443.831	565.792	-0.136655	0.150244	0.28039	545.645	496.359
Ankrd28	730.528	758.738	727.079	1003.22	1247.12	888.543	0.488533	2.45889e-06	3.21889e-05	738.782	1046.29
Ankrd29	19.6849	37.2133	25.4223	38.1082	34.9852	26.8959	0.250995	0.47533	0.634813	27.4402	33.3297
Ankrd32	207.785	169.527	230.496	265.871	312.808	200.497	0.328291	0.0648486	0.148864	202.603	259.725
Ankrd33b	258.091	266.695	213.548	304.865	312.122	255.756	0.246435	0.311687	0.474834	246.111	290.915
Ankrd34a	4.37442	0	1.69482	0.886237	0	2.9341	-0.684874	0.628474	NA	2.02308	1.27345
Ankrd34b	2.18721	8.26962	1.69482	0.886237	8.2318	1.46705	-0.485015	0.650309	NA	4.05055	3.52836
Ankrd35	19.6849	14.4718	22.0327	10.6348	9.60377	16.1375	-0.60408	0.178011	0.31725	18.7298	12.1254
Ankrd36	2.18721	0	0	0.886237	2.74393	0.978033	1.09351	0.506495	NA	0.72907	1.53607
Ankrd37	37.1826	6.20222	8.47411	14.1798	11.6617	6.35721	-0.530377	0.303453	0.466072	17.2863	10.7329
Ankrd39	72.1779	55.8199	69.4877	53.1742	43.9029	48.9016	-0.442983	0.058066	0.136557	65.8285	48.6596
Ankrd40	470.25	585.076	654.202	671.767	655.8	650.392	0.206962	0.0938504	0.197052	569.842	659.32
Ankrd42	96.2372	80.6288	91.5204	77.1026	85.062	98.7813	-0.0294127	0.878655	0.930617	89.4621	86.982
Ankrd44	332.456	295.639	316.932	326.135	360.827	300.256	0.0561392	0.622482	0.757561	315.009	329.073
Ankrd45	0	4.13481	0	0.886237	0	0.489016	-1.69569	0.374225	NA	1.37827	0.458418
Ankrd46	384.949	351.459	469.466	472.364	500.082	484.615	0.2665	0.0229417	0.0660388	401.958	485.687
Ankrd49	286.524	301.841	308.458	366.902	428.054	365.784	0.372747	0.00668674	0.0242965	298.941	386.913
Ankrd50	255.903	274.965	286.425	390.83	347.108	358.938	0.419072	0.000407279	0.00244574	272.431	365.625
Ankrd52	531.492	591.278	564.376	557.443	452.749	461.632	-0.198765	0.160271	0.294393	562.382	490.608
Ankrd53	10.936	8.26962	6.77929	6.20366	5.48787	4.40115	-0.691289	0.284333	0.445467	8.66165	5.36422
Ankrd54	179.351	215.01	205.074	124.073	85.062	134.48	-0.804034	3.69012e-05	0.000319761	199.812	114.538
Ankrd55	4.37442	2.06741	1.69482	0	1.37197	0	-2.61527	0.108368	NA	2.71222	0.457322
Ankrd6	37.1826	43.4155	45.7602	55.8329	39.787	61.1271	0.303432	0.277333	0.437324	42.1194	52.249
Ankrd61	26.2465	14.4718	8.47411	15.066	19.2075	13.6925	0.0480837	0.917436	0.952734	16.3975	15.9887
Ankrd63	2.18721	0	3.38965	2.65871	1.37197	2.9341	0.329613	0.766794	0.860949	1.85895	2.32159
Ankrd66	2.18721	0	0	3.54495	1.37197	0.489016	1.22521	0.499781	NA	0.72907	1.80198
Ankrd9	48.1186	68.2244	57.624	24.8146	23.3234	26.8959	-1.20688	3.07874e-05	0.000275052	57.989	25.0113
Anks1	562.113	572.671	484.719	381.968	261.36	375.565	-0.669967	7.09079e-05	0.000559535	539.834	339.631
Anks1b	10.936	2.06741	1.69482	3.54495	0	2.44508	-1.2788	0.259261	NA	4.89942	1.99668
Anks3	474.624	376.268	357.608	303.979	270.278	308.569	-0.439246	0.000648746	0.00358912	402.833	294.275
Anks6	52.493	43.4155	28.812	23.0422	14.4057	27.8739	-0.910439	0.0180763	0.0545109	41.5735	21.7739
Ankub1	2.18721	0	1.69482	0	1.37197	2.44508	0.0547513	0.9712	NA	1.29401	1.27235
Ankzf1	317.145	198.471	208.463	243.715	229.118	239.129	-0.00632742	0.967216	0.980437	241.36	237.321
Anln	306.209	303.909	399.978	352.722	411.59	420.554	0.231465	0.103441	0.211748	336.699	394.955
Ano1	8827.58	12243.2	9448.64	10723.5	10313.8	9791.58	0.0257314	0.782404	0.870813	10173.1	10276.3
Ano10	568.674	707.053	674.539	726.714	696.273	774.113	0.178577	0.0504637	0.122312	650.089	732.367
Ano2	4.37442	2.06741	1.69482	0.886237	1.37197	1.46705	-1.02448	0.390052	NA	2.71222	1.24175
Ano3	32.8081	33.0785	15.2534	40.7669	37.0431	30.319	0.44112	0.201227	0.347401	27.0467	36.043
Ano4	367.451	235.684	206.768	238.398	280.567	158.441	-0.261628	0.0927243	0.195359	269.968	225.802
Ano5	0	49.6177	83.0463	16.8385	0	4.89016	-0.657851	0.704486	0.81769	44.2213	7.24289
Ano6	1100.17	1250.78	1182.99	1489.76	1354.82	1525.73	0.305453	0.00257853	0.0112775	1177.98	1456.77
Ano7	4.37442	2.06741	3.38965	0	2.74393	2.44508	-0.812664	0.520085	NA	3.27716	1.72967
Ano8	166.228	196.403	162.703	120.528	91.2358	194.14	-0.418173	0.0424469	0.107102	175.111	135.301
Ano9	41.557	57.8873	89.8256	88.6237	78.2021	121.765	0.616654	0.00535652	0.0203612	63.09	96.197
Anp32a	555.551	727.727	757.586	930.549	872.571	1137.94	0.528218	0.000168679	0.00116783	680.288	980.354
Anp32b	240.593	241.886	279.646	652.27	598.178	776.069	1.40787	7.15486e-23	3.6435e-20	254.042	675.506
Anp32e	242.78	351.459	371.166	550.353	532.323	585.842	0.788918	1.13453e-06	1.64454e-05	321.802	556.173
Anpep	909.879	1476.13	1555.85	1932.88	2354.3	1506.17	0.604437	0.00303159	0.0129164	1313.95	1931.12
Antxr1	656.163	655.367	738.943	644.294	651.684	529.116	-0.18968	0.171228	0.308947	683.491	608.365
Antxr2	358.702	357.661	430.485	358.926	321.726	316.883	-0.213571	0.0934657	0.196537	382.283	332.512
Antxrl	102.799	18.6066	16.9482	46.9705	76.8302	35.6982	0.422319	0.355842	0.52011	46.1179	53.1663
Anxa1	1310.14	1145.34	1733.8	1671.44	1742.4	1928.19	0.356564	0.0356829	0.0934727	1396.43	1780.68
Anxa11	161.853	192.269	179.651	115.211	123.477	137.903	-0.493322	0.000997812	0.00512906	177.924	125.53
Anxa13	0	0	3.38965	1.77247	2.74393	0.489016	0.256609	0.868601	NA	1.12988	1.66847
Anxa2	1478.55	1474.06	1610.08	1051.08	1122.27	1390.76	-0.359788	0.00908958	0.0311418	1520.9	1188.04
Anxa3	430.88	318.38	416.926	320.818	385.523	330.086	-0.170362	0.323068	0.487026	388.729	345.476
Anxa4	789.583	1151.54	1232.14	1573.96	1383.63	1626.47	0.553043	1.24095e-05	0.000126725	1057.75	1528.02
Anxa5	1432.62	1658.06	1632.11	1528.76	1369.91	1772.2	-0.0200203	0.869296	0.925516	1574.27	1556.95
Anxa6	2047.23	2602.86	2594.77	2225.34	1987.98	2451.44	-0.121468	0.265265	0.423735	2414.95	2221.59
Anxa7	1093.6	1106.06	1069.43	1157.43	1116.78	1058.72	0.0251085	0.809121	0.887935	1089.7	1110.98
Anxa8	161.853	66.157	69.4877	85.965	166.694	94.3802	0.288881	0.375657	0.539548	99.1661	115.68
Anxa9	56.8674	31.0111	35.5913	26.5871	33.6132	30.319	-0.388269	0.20867	0.356423	41.1566	30.1731
Aoah	52.493	43.4155	38.9809	42.5394	33.6132	41.0774	-0.19671	0.475891	0.63545	44.9632	39.0766
Aoc1	2.18721	4.13481	13.5586	6.20366	6.85984	15.1595	0.585856	0.417879	0.582583	6.62687	9.40767
Aoc2	59.0547	35.1459	52.5395	31.9045	27.4393	29.83	-0.711418	0.0181607	0.0547006	48.9133	29.7246
Aoc3	866.135	1060.58	1089.77	1233.64	1016.63	1063.61	0.134669	0.377497	0.541403	1005.49	1104.63
Aox1	203.41	157.123	164.398	240.17	191.389	179.958	0.216697	0.204491	0.351694	174.977	203.839
Aox2	4.37442	0	0	7.08989	3.42992	4.89016	1.97437	0.112281	NA	1.45814	5.13666
Aox3	45.9314	37.2133	32.2016	12.4073	24.6954	19.5607	-0.979778	0.00420828	0.0168547	38.4488	18.8878
Aox4	4.37442	8.26962	11.8638	7.08989	21.2655	22.0057	1.2009	0.0887988	0.189123	8.16927	16.787
Ap1ar	284.337	359.729	333.88	389.058	360.827	409.307	0.247972	0.0381236	0.0985974	325.982	386.397
Ap1b1	1036.74	1242.51	1018.59	1092.73	947.343	948.692	-0.138306	0.232557	0.386598	1099.28	996.255
Ap1g1	2248.45	2104.62	1840.58	2352.07	2468.85	1810.83	0.0878754	0.351022	0.515077	2064.55	2210.58
Ap1g2	247.155	237.752	215.243	196.745	168.066	211.744	-0.276184	0.0775884	0.170329	233.383	192.185
Ap1m1	419.944	403.144	332.185	296.889	322.412	296.344	-0.327484	0.00651746	0.0238085	385.091	305.215
Ap1m2	1373.57	1356.22	1327.05	1057.28	1162.06	1111.05	-0.28201	0.00373777	0.015272	1352.28	1110.13
Ap1s1	306.209	347.324	308.458	270.302	312.808	306.613	-0.105804	0.383712	0.548089	320.664	296.575
Ap1s2	185.913	152.988	216.937	302.207	265.476	186.804	0.411906	0.0396447	0.101788	185.279	251.496
Ap1s3	54.6802	43.4155	59.3188	61.1503	68.5984	41.0774	0.066926	0.7856	0.872583	52.4715	56.942
Ap2a1	538.053	576.806	510.142	337.656	275.765	336.932	-0.774713	8.49606e-08	1.7966e-06	541.667	316.785
Ap2a2	1695.09	1732.49	1394.84	1403.8	1319.83	1341.86	-0.238612	0.0598807	0.139834	1607.47	1355.16
Ap2b1	1859.13	1970.24	1901.59	2465.51	2348.81	2121.84	0.271512	0.00457219	0.0179423	1910.32	2312.05
Ap2m1	686.784	880.715	845.717	783.433	767.616	848.933	-0.00287201	0.980038	0.988319	804.405	799.994
Ap2s1	562.113	649.165	533.869	331.453	273.707	360.405	-0.845907	3.7825e-08	8.76862e-07	581.716	321.855
Ap3b1	936.126	1079.19	989.777	1194.65	1264.27	1096.37	0.238168	0.0139435	0.0441208	1001.7	1185.1
Ap3b2	0	6.20222	0	0	0.685984	3.42312	-0.622567	0.669028	NA	2.06741	1.3697
Ap3d1	2279.07	2522.23	2038.87	2069.36	1751.32	2092.01	-0.204374	0.0680061	0.154373	2280.06	1970.9
Ap3m1	723.966	822.827	728.774	868.512	886.977	745.75	0.130084	0.221494	0.372702	758.522	833.746
Ap3m2	98.4244	117.842	122.027	112.552	104.955	110.029	-0.0486028	0.784874	0.872355	112.765	109.179
Ap3s1	413.383	419.683	389.809	488.316	551.531	444.516	0.273228	0.020004	0.0591562	407.625	494.788
Ap3s2	273.401	372.133	357.608	383.74	387.581	424.466	0.260402	0.0231732	0.0665821	334.381	398.596
Ap4b1	384.949	378.335	316.932	262.326	285.369	257.712	-0.416825	0.00138389	0.00676535	360.072	268.469
Ap4e1	389.323	314.246	286.425	402.351	442.459	332.042	0.248238	0.0376396	0.0976717	329.998	392.284
Ap4m1	212.159	229.482	303.373	264.099	232.548	296.833	0.0930124	0.494618	0.650787	248.338	264.493
Ap4s1	190.287	171.595	199.989	243.715	244.896	198.052	0.272763	0.0599812	0.140001	187.29	228.888
Ap5b1	104.986	146.786	144.06	66.4678	38.4151	71.8854	-1.17059	4.27598e-07	7.20222e-06	131.944	58.9228
Ap5m1	325.894	295.639	250.834	415.645	445.889	357.96	0.48403	1.51309e-05	0.000150492	290.789	406.498
Ap5s1	83.114	105.438	77.9619	57.6054	51.4488	74.3305	-0.529191	0.0461471	0.113838	88.8378	61.1282
Ap5z1	172.79	200.538	196.599	107.235	89.8638	145.238	-0.73919	1.93238e-05	0.000185433	189.976	114.112
Apaf1	358.702	301.841	345.744	473.25	399.242	444.516	0.385817	0.00152274	0.00732288	335.429	439.003
Apba1	69.9907	74.4266	50.8447	50.5155	42.531	48.4126	-0.460578	0.0680972	0.154488	65.0873	47.153
Apba3	304.022	384.537	277.951	107.235	63.1105	98.2923	-1.85062	1.1223e-20	4.51193e-18	322.17	89.5458
Apbb1	59.0547	84.7636	66.0981	31.9045	33.6132	49.3907	-0.866722	0.0090338	0.0309994	69.9721	38.3028
Apbb1ip	87.4884	80.6288	83.0463	85.965	97.4097	66.9953	-0.0256833	0.903736	0.945837	83.7212	83.4566
Apbb2	540.241	618.154	545.733	696.582	607.095	590.732	0.145856	0.22581	0.378215	568.043	631.47
Apbb3	185.913	183.999	135.586	141.798	152.288	164.31	-0.123959	0.470966	0.630864	168.499	152.799
Apc	2265.95	2158.37	2267.67	3251.6	3145.23	2490.56	0.399278	5.82348e-06	6.77057e-05	2230.66	2962.47
Apc2	41.557	39.2807	37.2861	17.7247	15.0916	27.3849	-0.958554	0.0100737	0.0338085	39.3746	20.0671
Apcdd1	168.415	190.201	172.872	221.559	155.718	239.129	0.199913	0.332824	0.496758	177.163	205.469
Apeh	319.333	345.257	345.744	298.662	268.22	334.487	-0.162963	0.201066	0.34728	336.778	300.456
Apex1	80.9267	126.112	135.586	48.743	42.531	88.512	-0.929234	4.18469e-05	0.000356352	114.208	59.9287
Apex2	80.9267	59.9548	72.8774	77.9888	63.1105	64.5502	-0.0642849	0.77341	0.864164	71.253	68.5498
Aph1a	190.287	283.235	237.275	280.937	254.5	267.492	0.1792	0.170686	0.308242	236.932	267.643
Aph1b	78.7395	119.91	93.2153	124.959	111.815	122.743	0.29718	0.115701	0.230632	97.2881	119.839
Aph1c	43.7442	35.1459	22.0327	38.1082	31.5552	28.363	-0.0157273	0.961633	0.977437	33.6409	32.6755
Api5	1154.85	1426.51	1274.51	1829.19	1759.55	1697.87	0.455614	7.81794e-06	8.61101e-05	1285.29	1762.2
Apip	284.337	283.235	293.204	236.625	277.137	266.025	-0.140622	0.289611	0.451238	286.925	259.929
Apitd1	8.74884	12.4044	35.5913	12.4073	7.54582	18.5826	-0.573455	0.2233	0.375039	18.9148	12.8453
Aplf	102.799	113.707	127.112	121.414	165.322	142.304	0.322422	0.0810834	0.175903	114.539	143.013
Apln	1463.24	3309.92	2411.73	2005.55	2016.11	2075.39	-0.120874	0.574739	0.719093	2394.96	2032.35
Aplnr	651.788	938.602	713.52	767.481	500.768	607.848	-0.312701	0.18102	0.321226	767.97	625.365
Aplp1	28.4337	24.8089	25.4223	19.4972	16.4636	19.0716	-0.504432	0.174506	0.312939	26.2216	18.3442
Aplp2	2821.5	4242.32	3855.72	5706.48	4772.39	6043.75	0.604523	3.217e-08	7.67908e-07	3639.85	5507.54
Apmap	741.464	930.332	786.398	991.699	1019.37	965.808	0.276196	0.00920941	0.0313914	819.398	992.293
Apoa1bp	374.013	370.066	449.128	306.638	292.229	336.443	-0.352739	0.00495306	0.0191371	397.735	311.77
Apoa2	2.18721	0	1.69482	0	2.05795	2.9341	0.436473	0.750781	NA	1.29401	1.66402
Apob	13.1233	12.4044	10.1689	10.6348	25.3814	4.89016	0.101114	0.876738	0.929422	11.8989	13.6355
Apobec1	227.47	210.875	199.989	241.056	235.978	207.832	0.0945175	0.550902	0.698515	212.778	228.289
Apobec2	6.56163	190.201	188.125	20.3834	10.9757	14.1815	-2.21364	0.012418	0.0401417	128.296	15.1802
Apobec3	1574.79	1397.57	1659.23	1737.91	1782.87	1815.23	0.203911	0.0755564	0.166947	1543.86	1778.67
Apobec4	0	0	0	1.77247	0.685984	2.44508	2.05741	0.210875	NA	0	1.63451
Apobr	290.899	320.448	313.542	367.788	384.151	486.082	0.414641	0.061519	0.142809	308.296	412.674
Apoc1	301.835	339.054	415.232	298.662	288.113	324.218	-0.208386	0.545868	0.694935	352.04	303.664
Apoc3	2.18721	2.06741	3.38965	2.65871	6.17385	4.40115	0.788595	0.435512	NA	2.54809	4.41124
Apod	214.347	349.391	301.678	172.816	166.694	251.354	-0.557142	0.0177782	0.053835	288.472	196.955
Apoe	3558.59	5251.21	4392.98	2512.48	1867.25	3164.43	-0.823704	9.40358e-06	0.000100339	4400.93	2514.72
Apof	17.4977	39.2807	32.2016	24.8146	29.4973	25.9179	-0.198781	0.665838	0.790427	29.66	26.7433
Apol10b	131.233	43.4155	66.0981	77.1026	82.318	78.2426	0.079661	0.74419	0.844492	80.2487	79.2211
Apol11b	0	8.26962	3.38965	3.54495	0.685984	2.9341	-0.654667	0.564325	NA	3.88642	2.38834
Apol6	791.77	243.954	220.327	365.13	449.319	396.103	0.170831	0.510512	0.664205	418.684	403.517
Apol7a	192.474	111.64	105.079	132.936	176.298	135.458	0.147297	0.583478	0.725465	136.398	148.23
Apol7c	4.37442	6.20222	3.38965	1.77247	4.1159	2.9341	-0.622039	0.504567	0.658565	4.65543	2.94082
Apol7e	6.56163	0	0	9.7486	5.48787	6.84623	1.9838	0.0524777	0.126213	2.18721	7.3609
Apol9a	30.6209	28.9437	16.9482	9.7486	21.9515	14.1815	-0.710007	0.113412	0.227035	25.5043	15.2939
Apol9b	19.6849	14.4718	16.9482	10.6348	8.2318	15.1595	-0.581675	0.245075	0.400987	17.035	11.3421
Apold1	69.9907	80.6288	74.5722	62.9228	91.2358	63.5721	-0.0665238	0.801714	0.882878	75.0639	72.5769
Apom	4.37442	8.26962	8.47411	5.31742	9.60377	7.33525	0.103951	0.876393	0.929374	7.03938	7.41881
Apon	0	0	1.69482	0	0	1.46705	-0.800039	0.714567	NA	0.564941	0.489016
Apoo	32.8081	24.8089	28.812	27.4733	26.7534	22.0057	-0.192096	0.590418	0.731178	28.8097	25.4108
Apool	196.849	254.291	305.068	321.704	382.779	321.773	0.458832	0.009308	0.031685	252.069	342.085
Apopt1	216.534	190.201	194.905	186.11	211.969	208.81	0.0206405	0.878872	0.930718	200.547	202.296
App	3722.63	5718.44	4876.01	4629.7	4356	5293.11	0.00469001	0.968416	0.980949	4772.36	4759.6
Appbp2	485.56	527.188	581.324	738.235	788.881	642.568	0.433507	4.11116e-05	0.000351265	531.358	723.228
Appbp2os	24.0593	10.337	3.38965	13.2936	14.4057	18.0936	0.349032	0.539406	0.690333	12.5953	15.2643
Appl1	590.547	560.267	732.163	912.824	939.111	751.129	0.452859	0.000216174	0.00144466	627.659	867.688
Appl2	1218.28	1188.76	1218.58	1391.39	1417.93	1321.32	0.187494	0.0242617	0.0691763	1208.54	1376.88
Aprt	212.159	303.909	230.496	127.618	119.361	154.529	-0.885633	1.0287e-06	1.51987e-05	248.855	133.836
Aptx	236.219	181.932	216.937	255.236	249.012	225.437	0.194312	0.132862	0.25528	211.696	243.228
Aqp1	2047.23	3161.06	2076.16	2129.63	1961.91	2180.04	-0.211376	0.171764	0.309581	2428.15	2090.53
Aqp11	10.936	10.337	11.8638	17.7247	20.5795	17.6046	0.753234	0.13336	0.256109	11.0456	18.6363
Aqp2	4.37442	2.06741	0	2.65871	1.37197	0.489016	-0.427106	0.776885	NA	2.14727	1.50656
Aqp3	384.949	585.076	316.932	154.205	291.543	153.551	-1.07844	0.00718685	0.0257445	428.985	199.766
Aqp4	0	20.6741	16.9482	1.77247	2.05795	2.44508	-2.02776	0.0470838	NA	12.5408	2.09184
Aqp5	142.169	237.752	196.599	88.6237	83.004	148.661	-0.848114	0.00139065	0.00678317	192.173	106.763
Aqp7	155.292	173.662	186.431	213.583	218.143	184.359	0.253261	0.20311	0.349947	171.795	205.362
Aqp9	30.6209	8.26962	6.77929	7.08989	26.7534	13.6925	0.202947	0.682574	0.802438	15.2233	15.8452
Aqr	857.386	893.119	867.749	1063.48	923.334	984.39	0.181743	0.0448501	0.111465	872.751	990.403
Ar	330.269	396.942	391.504	480.34	399.928	367.251	0.15087	0.308616	0.471661	372.905	415.84
Araf	798.331	783.547	857.58	712.534	641.395	704.184	-0.247025	0.00413899	0.0166267	813.153	686.038
Arap1	1251.08	1147.41	1135.53	786.092	609.153	819.103	-0.678104	3.72112e-08	8.68028e-07	1178.01	738.116
Arap2	533.679	444.492	460.992	647.839	629.733	579.974	0.368159	0.00222442	0.0100095	479.721	619.182
Arap3	406.821	361.796	311.847	233.08	204.423	213.7	-0.726033	9.96312e-07	1.48205e-05	360.155	217.068
Arc	13.1233	10.337	3.38965	7.08989	3.42992	5.37918	-0.753824	0.283469	0.444388	8.94998	5.29966
Arcn1	3866.99	4393.24	3438.8	4203.42	4278.48	3561.02	0.0397782	0.730436	0.834933	3899.67	4014.31
Areg	8.74884	2.06741	8.47411	27.4733	2.74393	33.7421	1.42066	0.125433	0.24499	6.43012	21.3198
Arel1	809.267	936.535	828.768	1049.3	926.078	983.412	0.203971	0.0205357	0.0604245	858.19	986.265
Arf1	2736.2	3171.4	2665.96	2843.93	2636.23	2851.94	-0.0343273	0.726178	0.831808	2857.85	2777.37
Arf2	321.52	446.56	350.828	378.423	394.441	435.225	0.118777	0.331328	0.495373	372.969	402.696
Arf3	1349.51	1852.4	1540.59	1797.29	1591.48	1820.61	0.145587	0.160385	0.294567	1580.83	1736.46
Arf4	1852.57	1649.79	1547.37	2389.29	2370.07	1589.3	0.306131	0.00908351	0.031128	1683.24	2116.22
Arf5	374.013	479.638	422.011	324.363	279.195	382.9	-0.366929	0.00527003	0.0201048	425.221	328.819
Arf6	1544.17	2313.43	1882.95	2545.27	2372.82	2829.45	0.444824	0.000156228	0.00109181	1913.51	2582.51
Arfgap1	1060.8	839.367	760.975	605.3	533.009	633.276	-0.567564	6.7077e-05	0.000534551	887.046	590.528
Arfgap2	697.72	721.524	760.975	649.611	603.665	657.238	-0.190453	0.0922561	0.194539	726.74	636.838
Arfgap3	1964.11	1732.49	1367.72	1111.34	1243.69	1114.96	-0.527873	2.21376e-06	2.94208e-05	1688.11	1156.66
Arfgef1	2528.41	2584.26	2562.57	3428.85	3940.98	2530.66	0.342219	0.000967724	0.00500969	2558.41	3300.16
Arfgef2	2497.79	2724.84	2279.54	2796.08	2539.51	2236.76	0.0173282	0.839872	0.908401	2500.72	2524.12
Arfgef3	179.351	105.438	161.008	154.205	121.419	84.5999	-0.338732	0.163543	0.298607	148.599	120.075
Arfip1	623.355	709.12	684.708	884.464	897.952	811.767	0.355637	0.000798042	0.00425688	672.394	864.728
Arfip2	769.898	884.849	681.319	613.276	578.284	663.106	-0.320669	0.0239538	0.0684772	778.689	618.222
Arfrp1	347.766	194.336	271.172	312.842	319.668	345.735	0.277652	0.0833577	0.17974	271.091	326.082
Arg1	37.1826	24.8089	23.7275	24.8146	31.5552	30.808	0.0591788	0.86173	0.921274	28.573	29.0593
Arg2	426.506	583.008	569.46	498.951	795.055	546.72	0.267239	0.400013	0.564683	526.325	613.576
Arglu1	839.888	659.502	559.292	1108.68	1044.75	1022.04	0.639395	3.37685e-08	7.99722e-07	686.227	1058.49
Arhgap1	612.419	804.221	708.436	796.727	764.872	835.729	0.178169	0.0769152	0.169409	708.358	799.109
Arhgap10	597.108	454.829	486.414	521.107	519.975	528.138	0.0369601	0.74698	0.846621	512.784	523.073
Arhgap11a	332.456	291.504	337.27	391.717	423.938	382.411	0.312886	0.010338	0.0345359	320.41	399.355
Arhgap12	861.76	723.592	830.463	980.178	1037.21	920.329	0.279959	0.00796474	0.0280169	805.272	979.238
Arhgap15	87.4884	49.6177	57.624	55.8329	61.7385	55.2589	-0.141718	0.543616	0.693397	64.91	57.6101
Arhgap15os	2.18721	2.06741	0	0	2.05795	1.95607	0.0537737	0.974182	NA	1.4182	1.33801
Arhgap17	459.314	299.774	296.594	390.83	395.126	260.157	-0.0143415	0.9237	0.956508	351.894	348.705
Arhgap18	820.203	922.063	889.782	941.183	899.324	787.317	-0.00412831	0.975672	0.985672	877.349	875.941
Arhgap19	194.662	165.392	235.58	228.649	242.838	264.069	0.303492	0.054649	0.130124	198.545	245.185
Arhgap20	113.735	101.303	110.163	117.869	128.965	117.364	0.164251	0.406087	0.570831	108.4	121.399
Arhgap20os	4.37442	6.20222	1.69482	6.20366	5.48787	3.91213	0.361068	0.680093	NA	4.09049	5.20122
Arhgap21	1415.12	1230.11	1411.79	1607.63	1502.3	1302.74	0.115074	0.259464	0.417157	1352.34	1470.89
Arhgap22	24.0593	24.8089	27.1172	13.2936	6.85984	11.7364	-1.27525	0.00258785	0.0113085	25.3284	10.6299
Arhgap23	229.657	196.403	201.684	146.229	133.767	152.573	-0.531224	0.000457456	0.00269007	209.248	144.19
Arhgap24	120.297	140.584	138.975	134.708	99.4676	111.007	-0.228163	0.251796	0.408266	133.285	115.061
Arhgap25	118.109	124.044	96.6049	98.3723	107.699	98.2923	-0.149326	0.439953	0.604095	112.92	101.455
Arhgap26	376.2	374.2	505.057	515.79	417.764	407.84	0.0914159	0.511424	0.665158	418.486	447.131
Arhgap27	459.314	436.223	377.945	235.739	215.399	283.63	-0.779907	6.19409e-06	7.11482e-05	424.494	244.922
Arhgap27os3	59.0547	28.9437	32.2016	37.2219	26.7534	14.1815	-0.640062	0.0912438	0.192985	40.0667	26.0523
Arhgap28	367.451	332.852	349.134	432.484	483.618	429.356	0.357557	0.00345895	0.0143571	349.812	448.486
Arhgap29	1568.23	1585.7	1481.28	1896.55	1915.27	1663.63	0.233042	0.0292274	0.0802837	1545.07	1825.15
Arhgap30	192.474	155.055	127.112	143.57	137.197	163.821	-0.0709171	0.669673	0.793487	158.214	148.196
Arhgap31	605.857	624.356	594.883	718.738	574.168	616.161	0.059706	0.624782	0.75915	608.365	636.356
Arhgap32	859.573	628.491	593.188	881.806	834.842	630.831	0.176168	0.189445	0.332436	693.751	782.493
Arhgap33	28.4337	37.2133	47.455	23.9284	22.6375	23.9618	-0.687262	0.0356237	0.0933648	37.7007	23.5092
Arhgap35	1528.86	1676.67	1547.37	1986.06	1944.76	1727.21	0.24826	0.00643414	0.0235605	1584.3	1886.01
Arhgap39	157.479	140.584	150.839	101.031	71.3423	109.051	-0.678899	0.000329944	0.00204651	149.634	93.808
Arhgap4	96.2372	62.0222	66.0981	46.0843	40.473	63.5721	-0.55427	0.030039	0.0820206	74.7858	50.0432
Arhgap40	2.18721	8.26962	5.08447	7.08989	2.05795	5.37918	-0.146204	0.849248	0.913788	5.18043	4.84234
Arhgap42	857.386	804.221	832.158	1068.8	1227.91	722.277	0.246621	0.0799705	0.174256	831.255	1006.33
Arhgap44	164.041	159.19	159.313	163.954	128.965	164.31	-0.078893	0.625579	0.759816	160.848	152.409
Arhgap5	2777.76	2714.5	2823.57	4008.45	4299.74	3305.26	0.467793	3.88525e-07	6.64474e-06	2771.94	3871.15
Arhgap6	124.671	113.707	118.638	150.66	157.776	155.507	0.380603	0.0277747	0.0769802	119.005	154.648
Arhgap8	135.607	152.988	189.82	180.792	136.511	201.475	0.116994	0.60778	0.745309	159.472	172.926
Arhgap9	242.78	210.875	149.144	116.097	129.651	133.991	-0.627407	0.000431718	0.00256529	200.933	126.579
Arhgdia	1353.88	1604.31	1411.79	1214.14	928.136	1237.7	-0.36894	0.00873894	0.0301842	1456.66	1126.66
Arhgdib	148.73	138.516	140.67	165.726	178.356	191.205	0.328892	0.0469761	0.115434	142.639	178.429
Arhgdig	21.8721	37.2133	33.8965	21.2697	20.5795	27.8739	-0.384956	0.261238	0.419084	30.9939	23.241
Arhgef1	581.798	514.784	544.038	409.441	337.504	449.895	-0.46009	0.00276225	0.0119612	546.873	398.947
Arhgef10	404.634	382.47	425.401	289.799	235.978	339.377	-0.492757	0.000231111	0.0015246	404.168	288.385
Arhgef10l	693.345	779.412	784.703	428.052	287.427	443.538	-0.967413	8.58775e-13	7.95121e-11	752.487	386.339
Arhgef11	756.774	663.637	633.864	677.971	595.434	637.678	-0.101809	0.412482	0.577324	684.758	637.027
Arhgef12	2734.01	3070.1	2903.23	3645.09	3411.4	3446.1	0.269597	0.00048764	0.00282594	2902.45	3500.86
Arhgef15	242.78	194.336	188.125	118.756	95.3517	108.073	-0.944405	3.97867e-07	6.78373e-06	208.414	107.393
Arhgef16	323.707	347.324	259.308	194.972	154.346	277.272	-0.590964	0.00202093	0.00924642	310.113	208.864
Arhgef17	643.04	618.154	555.902	380.196	286.741	423.488	-0.741465	0.000295508	0.001874	605.699	363.475
Arhgef18	973.308	953.074	972.828	889.782	727.143	937.934	-0.18498	0.054014	0.128893	966.403	851.619
Arhgef19	122.484	194.336	199.989	94.8273	55.5647	88.023	-1.11705	1.60222e-07	3.14212e-06	172.27	79.4717
Arhgef2	625.542	560.267	683.014	605.3	552.903	718.365	0.00347037	0.975028	0.985401	622.941	625.523
Arhgef25	422.131	374.2	335.575	266.757	248.326	325.196	-0.421328	0.00583028	0.0217879	377.302	280.093
Arhgef26	304.022	194.336	193.21	201.176	290.857	191.694	-0.0085871	0.956104	0.97466	230.523	227.909
Arhgef28	376.2	347.324	542.343	482.113	386.895	532.539	0.146969	0.398793	0.563494	421.956	467.182
Arhgef3	463.688	512.717	494.888	638.977	558.391	560.413	0.249411	0.071014	0.159399	490.431	585.927
Arhgef33	4.37442	0	1.69482	0	3.42992	0.978033	-0.287386	0.846494	NA	2.02308	1.46932
Arhgef37	65.6163	68.2244	77.9619	83.3062	69.9703	84.5999	0.173754	0.478106	0.637907	70.6008	79.2921
Arhgef38	170.602	97.168	113.553	163.068	149.544	117.853	0.177474	0.473363	0.632991	127.108	143.488
Arhgef39	21.8721	16.5392	28.812	9.7486	10.9757	15.1595	-0.891367	0.0321773	0.086362	22.4078	11.9613
Arhgef4	61.2419	37.2133	33.8965	31.9045	34.9852	51.8357	-0.119242	0.694075	0.810594	44.1172	39.5751
Arhgef40	909.879	884.849	952.49	738.235	434.228	802.476	-0.500561	0.0014773	0.00713524	915.74	658.313
Arhgef5	1161.41	1132.94	1025.37	1273.52	1243	1293.94	0.204791	0.00873298	0.0301704	1106.57	1270.15
Arhgef6	354.328	413.481	360.997	504.269	530.265	507.11	0.450514	0.00276497	0.0119695	376.269	513.881
Arhgef7	721.779	653.3	677.929	760.391	644.139	654.304	0.000808302	0.993476	0.996075	684.336	686.278
Arhgef9	76.5523	59.9548	81.3515	79.7613	87.1199	81.1767	0.182224	0.399977	0.564683	72.6195	82.686
Arid1a	1371.38	1234.24	1533.81	1516.35	1329.44	1100.29	-0.071917	0.604612	0.742645	1379.81	1315.36
Arid1b	1111.1	1343.81	1230.44	1230.1	1074.25	1049.92	-0.132676	0.243099	0.398692	1228.45	1118.09
Arid2	1395.44	1333.48	1554.15	2033.03	2011.3	1545.78	0.375362	0.000790977	0.00422509	1427.69	1863.37
Arid3a	120.297	198.471	130.501	128.504	116.617	126.166	-0.252372	0.143459	0.270505	149.756	123.763
Arid3b	91.8628	78.5614	88.1308	70.8989	61.7385	79.2207	-0.28272	0.168986	0.305841	86.185	70.6194
Arid4a	743.651	657.435	567.766	824.2	906.184	758.465	0.342737	5.64082e-05	0.000461074	656.284	829.616
Arid4b	947.062	709.12	862.665	1364.8	1318.46	1219.61	0.630886	3.65254e-10	1.65088e-08	839.615	1300.96
Arid5a	509.62	481.705	460.992	347.405	359.455	422.021	-0.3682	0.0297909	0.0815327	484.106	376.294
Arid5b	415.57	339.054	364.387	490.975	534.381	483.148	0.432284	0.00185933	0.0086128	373.004	502.835
Arih1	1410.75	1496.8	1621.95	2054.3	2128.61	1947.75	0.434914	3.20537e-07	5.65455e-06	1509.83	2043.55
Arih2	717.405	804.221	625.39	704.558	767.616	756.02	0.0623536	0.519173	0.671526	715.672	742.731
Arl1	1314.51	1099.86	1044.01	956.249	1043.38	916.906	-0.238357	0.0277548	0.0769417	1152.79	972.179
Arl10	59.0547	51.6851	37.2861	27.4733	28.1253	34.7202	-0.677657	0.0153369	0.0477485	49.342	30.1063
Arl11	6.56163	8.26962	3.38965	11.5211	12.3477	15.1595	1.14986	0.0577909	0.136098	6.07363	13.0094
Arl13a	10.936	0	10.1689	6.20366	10.2898	5.8682	0.0559276	0.940814	0.966016	7.03499	7.45387
Arl13b	275.588	231.549	296.594	294.231	328.586	341.334	0.263204	0.0500049	0.121393	267.911	321.383
Arl14ep	341.205	365.931	362.692	513.131	455.493	502.709	0.459379	0.000234526	0.00154101	356.609	490.444
Arl15	203.41	277.032	261.003	279.165	295.659	255.756	0.153966	0.292364	0.453922	247.148	276.86
Arl16	54.6802	62.0222	52.5395	70.0127	67.2264	76.7756	0.346176	0.131579	0.253422	56.414	71.3382
Arl2	85.3012	78.5614	103.384	53.1742	37.0431	55.2589	-0.8885	0.000233377	0.00153611	89.0823	48.4921
Arl2bp	209.972	289.437	284.73	297.776	296.345	309.547	0.204097	0.113728	0.22747	261.38	301.223
Arl3	78.7395	103.37	110.163	63.809	56.2506	78.7317	-0.557064	0.01086	0.0359497	97.4244	66.2638
Arl4a	1813.2	1389.3	1013.5	1416.21	1865.19	1091	0.0473077	0.756267	0.853349	1405.33	1457.46
Arl4c	251.529	347.324	262.698	344.746	323.784	333.998	0.211187	0.248992	0.405442	287.184	334.176
Arl4d	43.7442	70.2918	40.6757	39.8807	26.0674	36.6762	-0.591094	0.0317795	0.0855349	51.5706	34.2081
Arl5a	1065.17	1143.28	1189.77	1832.74	1928.99	1453.36	0.606864	3.74035e-07	6.43484e-06	1132.74	1738.36
Arl5b	557.738	587.143	444.044	724.055	845.818	597.089	0.43865	3.0963e-05	0.000276136	529.642	722.321
Arl5c	13.1233	28.9437	16.9482	12.4073	21.2655	20.5387	-0.1034	0.818593	0.89473	19.6717	18.0705
Arl6	54.6802	55.8199	40.6757	58.4916	63.7965	62.1051	0.303186	0.212478	0.360829	50.392	61.4644
Arl6ip1	748.026	946.872	1005.03	1252.25	1350.7	1313.01	0.541405	2.53557e-06	3.30511e-05	899.976	1305.32
Arl6ip4	216.534	248.089	223.717	186.996	174.926	226.904	-0.218849	0.197887	0.343141	229.446	196.275
Arl6ip5	507.433	483.773	501.668	407.669	456.865	484.126	-0.141643	0.325604	0.489454	497.624	449.553
Arl6ip6	146.543	159.19	132.196	215.356	270.963	183.381	0.598797	0.00010119	0.000754453	145.976	223.233
Arl8a	170.602	206.741	183.041	205.607	211.969	218.101	0.188796	0.202484	0.349019	186.795	211.892
Arl8b	1119.85	1445.12	1427.04	2004.67	2104.6	1699.82	0.539629	6.19969e-07	9.8659e-06	1330.67	1936.36
Arl9	2.18721	2.06741	3.38965	1.77247	2.74393	1.46705	-0.40136	0.748275	NA	2.54809	1.99449
Armc1	599.295	560.267	571.155	707.217	803.287	596.111	0.267079	0.00839905	0.0291685	576.906	702.205
Armc10	384.949	456.897	496.583	669.995	682.554	710.052	0.637149	0.000147179	0.0010352	446.143	687.533
Armc2	21.8721	10.337	8.47411	2.65871	7.54582	8.31328	-0.988279	0.107028	0.217486	13.5611	6.1726
Armc3	2.18721	2.06741	0	0.886237	0	0.978033	-1.0931	0.502746	NA	1.4182	0.621423
Armc5	157.479	163.325	135.586	79.7613	65.8544	80.1987	-1.01037	2.90364e-08	7.07477e-07	152.13	75.2715
Armc6	94.05	121.977	67.7929	37.2219	34.9852	51.3467	-1.1775	3.33724e-06	4.16188e-05	94.6066	41.1846
Armc7	85.3012	64.0896	74.5722	54.9467	50.7628	45.9676	-0.570538	0.00914767	0.0312778	74.6543	50.559
Armc8	581.798	558.199	581.324	686.833	713.423	585.353	0.195266	0.0480472	0.117575	573.774	661.87
Armc9	78.7395	82.6962	59.3188	89.5099	65.1684	89.49	0.151404	0.477506	0.637328	73.5848	81.3895
Armcx1	293.086	233.617	303.373	395.262	395.126	369.696	0.477197	0.000833688	0.00442078	276.692	386.695
Armcx2	319.333	365.931	360.997	287.141	278.509	298.3	-0.288527	0.164846	0.300448	348.754	287.983
Armcx3	247.155	219.145	225.411	249.033	205.795	226.904	-0.0199443	0.887784	0.936075	230.57	227.244
Armcx4	1006.12	1122.6	1682.96	2645.42	1760.92	2509.14	0.872954	7.90236e-07	1.21453e-05	1270.56	2305.16
Armcx5	48.1186	76.494	52.5395	63.809	72.7143	88.512	0.359276	0.154137	0.28584	59.0507	75.0118
Armcx6	13.1233	28.9437	30.5068	28.3596	28.1253	25.4289	0.147379	0.717361	0.826428	24.1912	27.3046
Armt1	168.415	235.684	206.768	221.559	227.061	183.87	0.0383757	0.803966	0.884565	203.623	210.83
Arnt	831.14	750.468	750.807	856.991	862.281	733.525	0.0666655	0.443008	0.606872	777.471	817.599
Arnt2	69.9907	49.6177	61.0136	68.2402	76.1442	59.171	0.168034	0.514276	0.66734	60.2073	67.8518
Arntl	360.89	409.346	364.387	455.526	380.035	308.08	-0.00751938	0.966098	0.979823	378.208	381.214
Arntl2	172.79	142.651	167.787	213.583	190.017	228.371	0.38545	0.0246368	0.0700105	161.076	210.657
Arpc1a	1065.17	1029.57	1055.87	969.543	931.566	1000.04	-0.117276	0.188489	0.331249	1050.2	967.049
Arpc1b	1248.9	1269.39	1189.77	904.848	813.576	1188.8	-0.353929	0.00603458	0.0223763	1236.02	969.074
Arpc2	868.322	1062.65	1018.59	1246.94	1227.22	1293.94	0.355867	0.000254096	0.00164833	983.186	1256.03
Arpc3	1124.23	1217.7	1220.27	834.835	934.996	1119.36	-0.299038	0.00647178	0.0236813	1187.4	963.063
Arpc4	660.537	783.547	715.215	823.314	809.461	804.921	0.176759	0.0362544	0.0947253	719.766	812.565
Arpc5	2298.76	2398.19	2577.83	2947.62	3362.01	2797.17	0.324678	0.00508922	0.0195593	2424.92	3035.6
Arpc5l	409.008	487.908	384.725	370.447	412.276	376.543	-0.14223	0.323741	0.487558	427.214	386.422
Arpin	203.41	217.078	210.158	194.972	179.728	241.085	-0.0295162	0.833038	0.903602	210.215	205.262
Arpp19	605.857	628.491	718.605	982.836	957.633	856.757	0.511011	6.99544e-07	1.08939e-05	650.984	932.409
Arr3	0	4.13481	0	2.65871	2.74393	1.95607	0.840419	0.525981	NA	1.37827	2.4529
Arrb1	2010.05	2350.64	2320.21	2446.9	1985.24	2547.29	0.0564855	0.59634	0.735828	2226.97	2326.47
Arrb2	159.666	161.258	116.943	110.78	98.0956	135.458	-0.335067	0.05891	0.138159	145.956	114.778
Arrdc1	417.757	446.56	444.044	286.254	244.21	381.922	-0.525587	3.33326e-05	0.000293764	436.12	304.129
Arrdc2	104.986	88.8984	105.079	68.2402	74.0862	134.48	-0.122832	0.576618	0.720219	99.6545	92.2687
Arrdc3	990.806	738.064	1118.58	1899.21	1963.97	1924.28	1.0257	2.90984e-10	1.35975e-08	949.151	1929.15
Arrdc4	1027.99	1017.16	1120.28	1532.3	1481.72	1514.48	0.514507	2.28235e-07	4.23169e-06	1055.14	1509.5
Arsa	170.602	217.078	198.294	160.409	137.883	155.507	-0.372486	0.0201135	0.0593769	195.325	151.266
Arsb	258.091	231.549	322.016	314.614	324.47	235.217	0.0832949	0.578893	0.722115	270.552	291.434
Arsg	100.612	86.831	57.624	67.354	91.9218	73.3525	-0.0498189	0.81678	0.893452	81.6889	77.5428
Arsi	30.6209	51.6851	33.8965	16.8385	13.7197	22.0057	-1.14776	0.00287579	0.0123582	38.7342	17.5213
Arsj	24.0593	20.6741	25.4223	15.066	18.5216	15.6485	-0.513465	0.163162	0.298264	23.3852	16.412
Arsk	135.607	192.269	144.06	230.422	249.012	182.403	0.47353	0.00671277	0.0243456	157.312	220.612
Art1	0	28.9437	23.7275	1.77247	0	1.46705	-2.8282	0.237213	0.391647	17.5571	1.07984
Art2a-ps	8.74884	2.06741	3.38965	7.97613	3.42992	4.89016	0.23048	0.770004	0.862772	4.7353	5.43207
Art2b	0	4.13481	1.69482	3.54495	4.80188	2.9341	1.13118	0.350451	NA	1.94321	3.76031
Art3	227.47	365.931	294.899	432.484	294.973	359.427	0.287781	0.125266	0.244912	296.1	362.295
Art4	48.1186	49.6177	54.2343	54.9467	63.1105	53.7918	0.165535	0.487886	0.646102	50.6569	57.283
Art5	0	4.13481	6.77929	2.65871	0	1.95607	-1.29069	0.249381	NA	3.63803	1.53826
Artn	4.37442	0	1.69482	2.65871	2.05795	1.95607	0.205793	0.871164	NA	2.02308	2.22424
Arv1	76.5523	62.0222	61.0136	78.8751	75.4582	61.1271	0.103034	0.647374	0.77629	66.5294	71.8201
Arvcf	225.283	235.684	225.411	109.007	96.0377	182.892	-0.848996	1.182e-06	1.70837e-05	228.793	129.312
Arxes1	13.1233	35.1459	18.6431	52.288	28.1253	36.6762	0.798002	0.0652463	0.149553	22.3041	39.0298
Arxes2	139.981	237.752	199.989	343.86	259.302	244.019	0.545607	0.0111991	0.0368805	192.574	282.394
As3mt	135.607	159.19	166.093	171.044	151.602	167.244	0.0801544	0.62205	0.757518	153.63	163.297
Asah1	1262.02	1013.03	942.322	1080.32	1323.95	1104.2	0.13415	0.197307	0.342452	1072.46	1169.49
Asah2	452.752	452.762	422.011	574.281	635.221	516.89	0.372137	0.00801811	0.0281592	442.508	575.464
Asap1	483.373	332.852	289.815	387.285	400.614	317.861	0.0175121	0.902363	0.945112	368.68	368.587
Asap2	325.894	241.886	296.594	323.476	255.872	314.438	0.0459959	0.763963	0.85924	288.125	297.929
Asap3	124.671	97.168	89.8256	62.9228	54.1927	73.8415	-0.692162	0.00763456	0.0270485	103.888	63.6523
Asb1	102.799	130.247	101.689	116.983	114.559	122.743	0.0825458	0.660102	0.7863	111.578	118.095
Asb10	0	2.06741	6.77929	0.886237	0.685984	0.489016	-2.10749	0.130844	NA	2.9489	0.687079
Asb11	0	4.13481	20.3379	3.54495	0	1.46705	-1.4909	0.251631	NA	8.15756	1.67067
Asb12	0	0	8.47411	0.886237	0.685984	1.46705	-1.20961	0.404453	NA	2.8247	1.01309
Asb13	317.145	289.437	262.698	238.398	301.833	243.53	-0.145615	0.245912	0.401948	289.76	261.254
Asb14	13.1233	14.4718	28.812	13.2936	17.1496	9.29131	-0.476009	0.397105	0.561876	18.8024	13.2448
Asb15	6.56163	10.337	8.47411	4.43118	0.685984	0.978033	-2.13935	0.0336085	NA	8.45759	2.03173
Asb16	0	6.20222	1.69482	0.886237	0.685984	0.978033	-1.55713	0.312568	NA	2.63235	0.850084
Asb2	161.853	134.381	162.703	83.3062	65.1684	101.226	-0.887565	0.000226672	0.00149973	152.979	83.2337
Asb3	153.105	171.595	144.06	198.517	186.588	155.507	0.197822	0.263377	0.42164	156.253	180.204
Asb4	4.37442	2.06741	5.08447	1.77247	2.05795	6.35721	-0.223816	0.804694	0.885111	3.8421	3.39588
Asb5	15.3105	20.6741	33.8965	6.20366	6.17385	3.91213	-2.14351	0.000110873	0.000811596	23.2937	5.42988
Asb6	190.287	190.201	167.787	77.1026	63.7965	107.095	-1.15257	1.44671e-07	2.87032e-06	182.759	82.6646
Asb7	277.776	330.785	291.51	331.453	417.078	315.416	0.235008	0.0679982	0.154373	300.023	354.649
Asb8	279.963	328.717	349.134	336.77	299.775	345.246	0.0355676	0.76653	0.860802	319.271	327.263
Ascc1	174.977	217.078	223.717	210.038	198.935	222.013	0.035795	0.786344	0.872994	205.257	210.329
Ascc2	249.342	243.954	213.548	216.242	174.24	198.541	-0.26199	0.0957889	0.199941	235.614	196.341
Ascc3	1966.3	1684.94	1494.83	2161.53	2324.11	1623.05	0.238792	0.00135396	0.00664242	1715.36	2036.23
Ascl1	0	0	1.69482	1.77247	0.685984	1.46705	0.844191	0.684432	NA	0.564941	1.3085
Ascl2	2.18721	0	0	1.77247	2.05795	1.95607	1.44415	0.323551	NA	0.72907	1.92883
Ascl3	2.18721	0	0	0.886237	0	0.489016	-0.554621	0.786015	NA	0.72907	0.458418
Asf1a	266.84	264.628	249.139	384.627	380.721	339.866	0.499934	0.000567007	0.00320583	260.202	368.405
Asf1b	50.3058	53.7525	83.0463	46.9705	58.9946	67.9733	-0.104334	0.659885	0.78617	62.3682	57.9795
Asgr2	8.74884	10.337	11.8638	4.43118	5.48787	5.37918	-1.01287	0.0886467	0.188878	10.3165	5.09941
Ash1l	2613.72	2383.72	2550.71	3311.87	3381.21	2584.94	0.285887	0.00110006	0.00557955	2516.05	3092.67
Ash2l	564.3	564.402	598.272	692.151	727.828	756.509	0.33563	0.000999814	0.00513763	575.658	725.496
Asic1	69.9907	64.0896	47.455	59.3779	48.7048	66.0172	-0.0395377	0.868516	0.925008	60.5118	58.0333
Asic2	2.18721	4.13481	5.08447	5.31742	2.05795	1.46705	-0.346877	0.73401	NA	3.80216	2.94747
Asic3	13.1233	8.26962	10.1689	9.7486	9.60377	7.33525	-0.255852	0.631515	0.764165	10.5206	8.89587
Asic4	10.936	6.20222	1.69482	0	1.37197	2.9341	-2.00971	0.0900929	NA	6.2777	1.43536
Asl	358.702	396.942	415.232	268.53	192.075	322.262	-0.588957	1.28373e-05	0.000130657	390.292	260.956
Asna1	304.022	363.863	350.828	286.254	257.244	321.284	-0.231399	0.0583989	0.137213	339.571	288.261
Asns	647.414	601.615	583.019	730.259	775.161	745.75	0.301832	0.00356133	0.0146992	610.683	750.39
Asnsd1	454.94	568.536	569.46	710.762	830.726	654.793	0.466735	0.000280396	0.00179381	530.979	732.094
Aspa	54.6802	51.6851	47.455	73.5576	34.9852	54.2808	0.0689789	0.829703	0.901454	51.2735	54.2745
Aspdh	0	2.06741	1.69482	3.54495	0.685984	0.978033	0.419258	0.77783	NA	1.25408	1.73632
Aspg	85.3012	68.2244	47.455	37.2219	41.845	51.3467	-0.556048	0.109151	0.220628	66.9935	43.4712
Asph	1012.68	1135.01	1094.86	1425.95	1420.67	1219.61	0.311546	0.0108122	0.0358225	1080.85	1355.41
Asphd1	4.37442	4.13481	0	2.65871	1.37197	1.95607	-0.44355	0.741146	NA	2.83641	1.99558
Asphd2	10.936	8.26962	3.38965	2.65871	5.48787	2.44508	-1.03998	0.16477	0.300435	7.53177	3.53055
Aspm	282.15	264.628	432.18	417.417	418.45	471.901	0.423621	0.00861555	0.0298187	326.319	435.923
Aspn	299.648	314.246	355.913	303.093	308.693	236.684	-0.221425	0.369304	0.533458	323.269	282.823
Asprv1	13.1233	12.4044	44.0654	33.677	22.6375	54.2808	0.683037	0.0742529	0.164663	23.1977	36.8651
Aspscr1	262.465	258.426	257.613	175.475	174.926	204.409	-0.485914	0.00286618	0.0123308	259.501	184.937
Asrgl1	126.858	171.595	167.787	157.75	150.916	220.546	0.182812	0.298858	0.460758	155.413	176.404
Aste1	172.79	103.37	120.332	130.277	154.346	105.628	-0.024344	0.88818	0.93619	132.164	130.084
Astn1	2.18721	8.26962	5.08447	0.886237	2.74393	2.9341	-1.19094	0.221878	NA	5.18043	2.18809
Astn2	21.8721	24.8089	11.8638	13.2936	15.7776	20.5387	-0.195591	0.644094	0.773632	19.5149	16.5366
Asun	424.319	413.481	401.673	516.676	507.628	491.462	0.290033	0.0034011	0.0141727	413.158	505.255
Asxl1	828.952	762.873	860.97	993.471	991.246	937.445	0.250928	0.00863702	0.0298795	817.598	974.054
Asxl2	1108.92	1029.57	1059.26	1371.89	1369.22	1036.71	0.23	0.0253128	0.0715322	1065.92	1259.28
Asxl3	30.6209	18.6066	33.8965	31.9045	36.3571	17.6046	-0.00633774	0.987087	0.992676	27.708	28.6221
Atad1	842.076	1041.97	1006.72	1445.45	1546.89	1312.52	0.573708	1.90967e-07	3.60619e-06	963.591	1434.96
Atad2	422.131	401.077	469.466	545.922	587.202	581.93	0.404578	8.96845e-05	0.000682666	430.891	571.684
Atad2b	1257.65	1116.4	1210.1	1783.11	1778.76	1480.25	0.484702	3.73389e-08	8.69553e-07	1194.72	1680.71
Atad3a	796.144	994.422	798.262	666.45	563.192	795.141	-0.351769	0.00445414	0.0175875	862.943	674.928
Atad3aos	8.74884	8.26962	15.2534	11.5211	13.7197	6.84623	-0.0106113	0.985812	0.992046	10.7573	10.6957
Atad5	161.853	161.258	186.431	229.535	240.78	197.074	0.37523	0.010512	0.0350027	169.847	222.463
Atat1	172.79	126.112	118.638	131.163	86.4339	93.8912	-0.415038	0.0328515	0.0877553	139.18	103.829
Atcay	4.37442	4.13481	3.38965	0	2.05795	0.489016	-2.22898	0.106596	NA	3.96629	0.848989
Atcayos	0	4.13481	6.77929	1.77247	0.685984	0.978033	-1.30179	0.337239	NA	3.63803	1.1455
Ate1	761.149	682.244	721.995	913.71	1033.78	839.152	0.357099	0.000175565	0.00120707	721.796	928.88
Atf1	266.84	279.1	271.172	398.807	376.605	340.355	0.443037	0.000350843	0.00215261	272.37	371.922
Atf2	697.72	798.018	801.651	1116.66	1211.45	998.572	0.526154	9.71142e-09	2.73951e-07	765.796	1108.89
Atf3	54.6802	117.842	94.9101	113.438	91.9218	127.144	0.338518	0.234995	0.389415	89.1441	110.835
Atf4	1846	2253.47	1784.65	1471.15	1524.26	1790.78	-0.286606	0.018088	0.0545244	1961.37	1595.4
Atf5	188.1	183.999	206.768	195.858	156.404	225.437	-0.00341837	0.985566	0.991992	192.956	192.566
Atf6	1152.66	1432.71	1011.81	1218.58	1317.77	1066.06	-0.000659316	0.995853	0.997616	1199.06	1200.8
Atf6b	352.141	336.987	344.049	171.93	137.883	186.804	-1.05329	1.78987e-07	3.41971e-06	344.392	165.539
Atf7	1590.1	1283.86	1542.29	1981.63	2071.67	1237.21	0.239758	0.108553	0.21989	1472.08	1763.5
Atf7ip	896.756	866.243	811.82	1098.93	919.218	781.937	0.112755	0.306306	0.469117	858.273	933.363
Atf7ip2	4.37442	4.13481	6.77929	8.86237	7.54582	3.42312	0.372927	0.676421	0.797783	5.09617	6.61043
Atg10	78.7395	105.438	123.722	126.732	158.462	140.837	0.471799	0.0317737	0.0855343	102.633	142.01
Atg101	249.342	256.358	242.36	141.798	114.559	172.623	-0.798227	5.76506e-08	1.27827e-06	249.353	142.993
Atg12	343.392	322.515	303.373	390.83	414.334	344.268	0.239743	0.0447648	0.111307	323.093	383.144
Atg13	483.373	487.908	344.049	463.502	537.811	371.164	0.0568418	0.678415	0.798901	438.443	457.492
Atg14	129.045	126.112	154.229	254.35	235.978	230.327	0.809388	4.36788e-07	7.34891e-06	136.462	240.218
Atg16l1	516.181	469.301	452.518	446.663	382.093	463.099	-0.149981	0.187213	0.329575	479.333	430.618
Atg16l2	120.297	117.842	113.553	91.2824	97.4097	116.386	-0.195901	0.303494	0.466072	117.231	101.693
Atg2a	562.113	624.356	588.104	358.926	254.5	414.197	-0.800865	9.55943e-09	2.70443e-07	591.524	342.541
Atg2b	1482.93	1184.62	1242.31	1552.69	1482.41	1346.75	0.166586	0.0702128	0.158183	1303.29	1460.62
[truncated: 15,290 more rows]
