# Supplementary material for: Cell-specific and shared enhancers control a high-density multi-gene locus active in mammary and salivary glands
Source: Research Square preprint supplement (doi:10.21203/rs.3.rs-2533579/v1), 2023-02-07
Supplement: Supplementary file 6 [file abe445ca5836e5f1dcc02bc4.xlsx]

## Sheet: p18-SE-allGenes-withFC-withMean
Gene	WT_p18_rep1	WT_p18_rep2	WT_p18_rep3	SE_p18_rep1	SE_p18_rep2	SE_p18_rep3	SE_p18_rep4	log2FoldChange	pvalue	padj	WT_mean	SE_mean
0610005C13Rik	4.37442	2.06741	10.1689	6.20683	2.9979	11.0008	8.71792	0.368822	0.646313	NA	5.53692	7.23087
0610007P14Rik	174.977	200.538	196.599	145.86	236.834	184.814	167.82	-0.0617802	0.694436	0.88231	190.705	183.832
0610009B22Rik	181.538	161.258	154.229	127.24	131.908	158.412	148.205	-0.205397	0.200459	0.51	165.675	141.441
0610009L18Rik	10.936	26.8763	15.2534	15.5171	23.9832	33.0025	21.7948	0.48324	0.272902	0.598281	17.6886	23.5744
0610009O20Rik	452.752	438.29	467.771	484.133	482.662	492.838	499.101	0.113993	0.338927	0.660995	452.938	489.683
0610010F05Rik	548.99	483.773	611.831	487.236	569.601	532.441	523.075	-0.0571056	0.662641	0.867953	548.198	528.088
0610010K14Rik	104.986	107.505	84.7411	124.137	134.906	114.409	117.692	0.313202	0.120033	0.389624	99.0774	122.786
0610011F06Rik	188.1	268.763	240.665	223.446	179.874	182.614	169.999	-0.296454	0.0651656	0.276387	232.509	188.983
0610012G03Rik	199.036	225.347	216.937	220.342	230.838	193.615	180.897	-0.0636343	0.65989	0.866918	213.774	206.423
0610030E20Rik	566.487	469.301	491.499	611.373	437.693	510.439	560.126	0.0619271	0.605865	0.839566	509.096	529.908
0610037L13Rik	203.41	175.729	249.139	176.895	212.851	200.215	213.589	-0.0610718	0.698572	0.884808	209.426	200.887
0610038B21Rik	15.3105	6.20222	8.47411	9.31024	2.9979	8.80067	6.53844	-0.461774	0.505373	NA	9.9956	6.91181
0610039H22Rik	13.1233	4.13481	15.2534	18.6205	8.9937	13.201	10.8974	0.236439	0.718744	NA	10.8372	12.9282
0610039K10Rik	0	4.13481	1.69482	6.20683	0	2.20017	0	0.129946	0.927982	NA	1.94321	2.10175
0610040B10Rik	21.8721	22.7415	16.9482	15.5171	17.9874	11.0008	17.4358	-0.402571	0.395973	0.705141	20.5206	15.4853
0610040F04Rik	0	0	0	0	2.9979	0	0	1.11494	0.570505	NA	0	0.749475
0610040J01Rik	201.223	322.515	393.199	415.858	479.664	332.225	422.819	0.463519	0.00369285	0.0408245	305.646	412.642
0610043K17Rik	37.1826	18.6066	16.9482	27.9307	11.9916	35.2027	52.3075	0.477504	0.263038	0.588691	24.2458	31.8581
1010001N08Rik	4.37442	2.06741	0	0	0	6.60051	2.17948	0.289446	0.830372	NA	2.14727	2.195
1110001J03Rik	172.79	128.179	116.943	52.758	65.9538	55.0042	63.2049	-1.21384	2.95606e-07	2.19734e-05	139.304	59.2302
1110002L01Rik	21.8721	26.8763	27.1172	21.7239	20.9853	17.6013	30.5127	-0.15447	0.699017	0.884904	25.2885	22.7058
1110004E09Rik	83.114	105.438	99.9945	114.826	77.9454	92.4071	76.2818	-0.0952193	0.659346	0.866899	96.1821	90.3652
1110004F10Rik	625.542	603.682	640.643	571.028	590.586	514.839	614.613	-0.12436	0.183574	0.489903	623.289	572.767
1110006O24Rik	8.74884	4.13481	8.47411	0	5.9958	6.60051	6.53844	-0.503877	0.542795	NA	7.11925	4.78369
1110007C09Rik	98.4244	88.8984	81.3515	93.1024	86.9391	72.6056	82.8203	-0.0973624	0.667683	0.870244	89.5581	83.8668
1110008F13Rik	172.79	204.673	169.482	198.619	143.899	134.21	152.564	-0.221989	0.192805	0.500464	182.315	157.323
1110008L16Rik	225.283	365.931	503.362	406.547	419.706	371.829	435.896	0.209342	0.27885	0.605746	364.859	408.494
1110008P14Rik	564.3	512.717	415.232	418.961	464.675	281.622	198.333	-0.590442	0.000961885	0.0154099	497.416	340.897
1110012L19Rik	135.607	159.19	152.534	139.654	107.924	110.008	165.641	-0.181511	0.308549	0.635258	149.11	130.807
1110019D14Rik	63.4291	55.8199	32.2016	68.2751	50.9643	52.804	63.2049	0.255628	0.367718	0.683709	50.4835	58.8121
1110020A21Rik	15.3105	8.26962	8.47411	9.31024	14.9895	4.40034	4.35896	-0.435677	0.488984	0.770625	10.6847	8.26476
1110028F11Rik	122.484	39.2807	111.858	62.0683	41.9706	63.8049	78.4613	-0.531345	0.11882	0.387346	91.2076	61.5763
1110032A03Rik	172.79	206.741	244.054	195.515	182.872	176.013	211.41	-0.12385	0.423871	0.725011	207.862	191.453
1110032F04Rik	8.74884	6.20222	11.8638	43.4478	44.9685	35.2027	52.3075	2.35941	1.47363e-05	0.000579386	8.93827	43.9816
1110034G24Rik	48.1186	47.5503	54.2343	34.1376	47.9664	37.4029	45.7691	-0.281938	0.346102	0.667418	49.9678	41.319
1110037F02Rik	1369.19	1403.77	1277.9	1325.16	1340.06	1199.09	1187.82	-0.100823	0.214602	0.529278	1350.29	1263.03
1110038B12Rik	216.534	186.066	233.886	226.549	239.832	220.017	213.589	0.0791691	0.618905	0.84541	212.162	224.997
1110038F14Rik	137.794	140.584	142.365	96.2058	131.908	136.41	124.23	-0.187865	0.315032	0.641327	140.248	122.189
1110046J04Rik	2.18721	14.4718	15.2534	6.20683	5.9958	2.20017	4.35896	-1.0051	0.229546	NA	10.6375	4.69044
1110051M20Rik	94.05	51.6851	57.624	37.241	47.9664	70.4054	67.5639	-0.236491	0.37008	0.686116	67.7864	55.7942
1110058D11Rik	19.6849	6.20222	5.08447	12.4137	5.9958	8.80067	6.53844	-0.11302	0.875371	NA	10.3239	8.43714
1110059E24Rik	288.712	279.1	298.289	248.273	161.887	248.619	329.102	-0.215845	0.265769	0.591832	288.7	246.97
1110059G10Rik	115.922	97.168	103.384	114.826	110.922	94.6073	106.795	0.00946192	0.960805	0.988374	105.491	106.788
1110065P20Rik	26.2465	16.5392	8.47411	6.20683	20.9853	6.60051	4.35896	-0.832653	0.2144	NA	17.0866	9.5379
1190002F15Rik	67.8035	45.4829	72.8774	40.3444	74.9475	46.2035	71.9229	-0.0905877	0.746253	0.908345	62.0546	58.3546
1190002N15Rik	236.219	341.122	247.444	257.583	245.828	292.622	287.691	-0.0255505	0.876482	0.958956	274.928	270.931
1190007I07Rik	52.493	49.6177	55.9292	49.6546	59.958	61.6047	34.8717	-0.0469002	0.875674	0.958558	52.68	51.5223
1200014J11Rik	450.565	551.997	552.512	539.994	593.584	486.237	499.101	0.0260124	0.811334	0.932089	518.358	529.729
1300002E11Rik	188.1	138.516	157.619	201.722	182.872	180.414	180.897	0.21031	0.27502	0.600349	161.412	186.476
1300017J02Rik	10.936	10.337	15.2534	0	8.9937	4.40034	6.53844	-1.27724	0.0759562	NA	12.1755	4.98312
1500004A13Rik	72.1779	28.9437	23.7275	40.3444	29.979	72.6056	56.6665	0.400766	0.242184	0.563074	41.6164	49.8989
1500009L16Rik	8.74884	10.337	3.38965	6.20683	2.9979	11.0008	8.71792	0.00960784	0.989441	NA	7.49184	7.23087
1500011B03Rik	34.9953	39.2807	38.9809	27.9307	56.9601	35.2027	54.487	0.210047	0.500958	0.777832	37.7523	43.6451
1500011K16Rik	83.114	72.3592	59.3188	77.5854	68.9517	72.6056	41.4101	-0.1483	0.559366	0.811518	71.5973	65.1382
1500012F01Rik	393.698	353.526	510.142	328.962	371.74	380.629	398.845	-0.176778	0.318891	0.643189	419.122	370.044
1500015A07Rik	41.557	18.6066	32.2016	68.2751	50.9643	35.2027	43.5896	0.654257	0.0494634	0.233678	30.7884	49.5079
1500015L24Rik	2.18721	0	6.77929	0	0	2.20017	2.17948	-1.23456	0.391142	NA	2.98883	1.09491
1500015O10Rik	137.794	140.584	155.924	121.033	95.9328	85.8066	122.051	-0.461728	0.0169916	0.118507	144.767	106.206
1500017E21Rik	2.18721	4.13481	8.47411	0	2.9979	2.20017	2.17948	-1.38912	0.215799	NA	4.93204	1.84439
1500026H17Rik	28.4337	28.9437	16.9482	21.7239	29.979	22.0017	21.7948	-0.0286695	0.94011	0.980005	24.7752	23.8748
1600002D24Rik	24.0593	4.13481	8.47411	12.4137	11.9916	8.80067	4.35896	-0.346584	0.621102	0.846782	12.2227	9.39122
1600002H07Rik	76.5523	90.9658	91.5204	77.5854	116.918	116.609	93.7177	0.246977	0.253023	0.577689	86.3462	101.208
1600002K03Rik	113.735	107.505	77.9619	62.0683	74.9475	46.2035	63.2049	-0.695705	0.00783019	0.0694546	99.7339	61.6061
1600010M07Rik	4.37442	0	1.69482	0	0	4.40034	2.17948	-0.072975	0.957703	NA	2.02308	1.64495
1600012H06Rik	365.264	409.346	399.978	335.169	398.721	354.227	377.05	-0.0963383	0.418441	0.72082	391.529	366.292
1600014C10Rik	411.195	417.616	427.095	394.134	338.763	473.036	383.589	-0.0675423	0.554988	0.80989	418.636	397.38
1600020E01Rik	76.5523	64.0896	77.9619	68.2751	59.958	57.2044	78.4613	-0.145672	0.535336	0.797862	72.8679	65.9747
1600023N17Rik	6.56163	2.06741	3.38965	6.20683	2.9979	8.80067	6.53844	0.665148	0.464719	NA	4.00623	6.13596
1600029I14Rik	4.37442	0	1.69482	3.10341	2.9979	2.20017	0	0.174371	0.911133	NA	2.02308	2.07537
1600029O15Rik	4.37442	4.13481	3.38965	3.10341	0	0	4.35896	-1.09688	0.395469	NA	3.96629	1.86559
1700001C19Rik	13.1233	0	3.38965	0	5.9958	2.20017	2.17948	-0.608408	0.608758	NA	5.5043	2.59386
1700001D01Rik	19.6849	8.26962	8.47411	9.31024	8.9937	4.40034	19.6153	-0.13258	0.837271	0.942913	12.1429	10.5799
1700001G11Rik	0	0	0	3.10341	5.9958	0	0	2.60546	0.173753	NA	0	2.2748
1700001G17Rik	0	2.06741	1.69482	0	2.9979	0	4.35896	0.66537	0.66342	NA	1.25408	1.83922
1700001J03Rik	10.936	2.06741	5.08447	6.20683	2.9979	6.60051	0	-0.556117	0.555357	NA	6.02931	3.95131
1700001K19Rik	17.4977	8.26962	6.77929	12.4137	8.9937	4.40034	13.0769	-0.128854	0.84302	NA	10.8489	9.72114
1700001K23Rik	8.74884	6.20222	6.77929	0	0	2.20017	8.71792	-1.2689	0.194857	NA	7.24345	2.72952
1700001L05Rik	150.917	215.01	199.989	260.687	233.836	140.811	156.923	0.0368503	0.867241	0.955109	188.639	198.064
1700001L19Rik	0	2.06741	0	6.20683	2.9979	0	0	1.535	0.370536	NA	0.689135	2.30118
1700001O22Rik	19.6849	16.5392	23.7275	27.9307	26.9811	35.2027	28.3332	0.577587	0.15529	0.447646	19.9839	29.6119
1700001P01Rik	10.936	2.06741	3.38965	3.10341	8.9937	0	4.35896	-0.30246	0.760076	NA	5.46437	4.11402
1700003E16Rik	28.4337	20.6741	22.0327	31.0341	26.9811	15.4012	6.53844	-0.325286	0.51748	0.787779	23.7135	19.9887
1700003F12Rik	2.18721	2.06741	0	0	0	0	0	-1.55012	0.393471	NA	1.4182	0
1700003G13Rik	56.8674	12.4044	22.0327	18.6205	20.9853	26.402	10.8974	-0.524594	0.270452	0.595754	30.4349	19.2263
1700007J10Rik	32.8081	16.5392	22.0327	15.5171	23.9832	19.8015	30.5127	-0.0437801	0.918932	0.972416	23.7934	22.4536
1700007K13Rik	0	0	0	6.20683	2.9979	0	0	2.46494	0.127465	NA	0	2.30118
1700007L15Rik	8.74884	18.6066	11.8638	6.20683	11.9916	15.4012	19.6153	0.128706	0.813317	0.933092	13.0731	13.3037
1700008J07Rik	39.3698	22.7415	20.3379	27.9307	20.9853	30.8024	19.6153	-0.113826	0.758217	0.911879	27.483	24.8334
1700009J07Rik	0	0	1.69482	0	2.9979	4.40034	0	1.43947	0.408181	NA	0.564941	1.84956
1700010I14Rik	21.8721	12.4044	8.47411	18.6205	5.9958	22.0017	13.0769	0.159279	0.755461	0.910779	14.2502	14.9237
1700011H14Rik	0	2.06741	1.69482	6.20683	0	6.60051	0	1.35746	0.339114	NA	1.25408	3.20183
1700011L22Rik	0	2.06741	1.69482	0	0	4.40034	2.17948	0.431541	0.78047	NA	1.25408	1.64495
1700012B07Rik	203.41	252.223	215.243	198.619	200.859	198.015	167.82	-0.211356	0.417874	0.720452	223.625	191.328
1700012D01Rik	10.936	8.26962	6.77929	6.20683	8.9937	15.4012	10.8974	0.340166	0.59112	0.830605	8.66165	10.3748
1700012D14Rik	37.1826	6.20222	8.47411	21.7239	2.9979	13.201	19.6153	-0.0271371	0.961651	0.988374	17.2863	14.3845
1700012D16Rik	15.3105	2.06741	5.08447	0	2.9979	4.40034	4.35896	-1.04792	0.288575	NA	7.48745	2.9393
1700015E13Rik	32.8081	10.337	28.812	24.8273	29.979	39.603	30.5127	0.397506	0.379415	0.69352	23.9857	31.2305
1700016C15Rik	6.56163	18.6066	28.812	6.20683	5.9958	4.40034	13.0769	-1.13273	0.0752512	0.302138	17.9934	7.41996
1700016H13Rik	4.37442	2.06741	0	0	2.9979	2.20017	2.17948	-0.106963	0.939777	NA	2.14727	1.84439
1700017B05Rik	478.999	607.817	415.232	574.132	419.706	440.034	385.768	-0.13956	0.327526	0.651008	500.683	454.91
1700018L02Rik	0	0	3.38965	0	0	2.20017	2.17948	0.132333	0.934655	NA	1.12988	1.09491
1700019D03Rik	28.4337	31.0111	45.7602	21.7239	29.979	17.6013	28.3332	-0.563998	0.115843	0.381564	35.0683	24.4094
1700019G17Rik	72.1779	115.775	118.638	142.757	122.914	127.61	159.102	0.436151	0.0372936	0.194822	102.197	138.096
1700019L03Rik	6.56163	10.337	5.08447	6.20683	2.9979	6.60051	2.17948	-0.696787	0.402145	NA	7.32771	4.49618
1700020A23Rik	2.18721	4.13481	1.69482	0	0	0	4.35896	-1.12079	0.463295	NA	2.67228	1.08974
1700020D05Rik	15.3105	2.06741	6.77929	3.10341	8.9937	2.20017	6.53844	-0.490042	0.571278	NA	8.05239	5.20893
1700020I14Rik	688.971	618.154	622	580.338	701.509	545.642	632.049	-0.0671054	0.495982	0.775296	643.042	614.885
1700020L24Rik	21.8721	10.337	15.2534	40.3444	14.9895	26.402	10.8974	0.542086	0.276138	0.601593	15.8208	23.1583
1700021F05Rik	133.42	212.943	179.651	161.378	173.878	136.41	165.641	-0.139289	0.430098	0.729569	175.338	159.327
1700021K19Rik	483.373	454.829	466.076	440.685	485.66	501.638	422.819	-0.0167326	0.883603	0.959798	468.093	462.701
1700022H01Rik	2.18721	0	5.08447	3.10341	0	6.60051	0	-0.0222454	0.987918	NA	2.42389	2.42598
1700022I11Rik	8.74884	16.5392	8.47411	0	5.9958	6.60051	0	-1.74831	0.0497783	NA	11.2541	3.14908
1700024F13Rik	2.18721	0	0	0	0	0	0	-0.56036	0.762071	NA	0.72907	0
1700024I08Rik	2.18721	0	0	3.10341	0	0	0	0.282076	0.95148	NA	0.72907	0.775854
1700024P16Rik	155.292	82.6962	79.6567	96.2058	83.9412	92.4071	91.5382	-0.167989	0.43232	0.730792	105.882	91.0231
1700025G04Rik	1207.34	1027.5	1193.16	1443.09	1546.92	1306.9	1320.77	0.290107	0.00278488	0.0337687	1142.67	1404.42
1700025N23Rik	8.74884	2.06741	6.77929	0	5.9958	2.20017	4.35896	-0.88431	0.365189	NA	5.86518	3.13873
1700026D08Rik	17.4977	14.4718	6.77929	12.4137	2.9979	2.20017	4.35896	-1.28974	0.0646937	0.275691	12.9163	5.49267
1700026L06Rik	4.37442	6.20222	0	3.10341	2.9979	2.20017	0	-0.754125	0.562004	NA	3.52554	2.07537
1700027J07Rik	4.37442	10.337	8.47411	3.10341	2.9979	2.20017	6.53844	-1.04192	0.22963	NA	7.72852	3.70998
1700028E10Rik	32.8081	22.7415	20.3379	12.4137	14.9895	28.6022	32.6922	-0.0841751	0.842367	0.945775	25.2958	22.1744
1700028J19Rik	2.18721	0	8.47411	9.31024	8.9937	2.20017	2.17948	0.524775	0.598915	NA	3.55377	5.6709
1700028K03Rik	4.37442	0	8.47411	3.10341	8.9937	13.201	15.2564	1.21615	0.124151	0.396218	4.28284	10.1386
1700029H14Rik	2.18721	0	0	3.10341	5.9958	4.40034	0	2.20492	0.180124	NA	0.72907	3.37489
1700029I15Rik	17.4977	12.4044	16.9482	12.4137	11.9916	19.8015	8.71792	-0.234401	0.650752	0.861933	15.6168	13.2312
1700029J07Rik	39.3698	24.8089	23.7275	40.3444	26.9811	46.2035	50.128	0.51326	0.14437	0.430965	29.3021	40.9143
1700030A11Rik	0	0	0	0	2.9979	4.40034	0	2.37023	0.207642	NA	0	1.84956
1700030C10Rik	28.4337	33.0785	8.47411	9.31024	14.9895	17.6013	6.53844	-0.969896	0.115581	0.38143	23.3288	12.1099
1700030J22Rik	15.3105	12.4044	15.2534	15.5171	26.9811	8.80067	19.6153	0.278346	0.594864	0.832877	14.3228	17.7285
1700030K09Rik	67.8035	68.2244	113.553	89.999	80.9433	81.4062	80.6408	-0.0231774	0.922359	0.973734	83.1937	83.2473
1700034H15Rik	6.56163	2.06741	8.47411	12.4137	5.9958	8.80067	21.7948	1.11948	0.121003	0.390892	5.70105	12.2512
1700034I23Rik	26.2465	4.13481	6.77929	3.10341	5.9958	11.0008	10.8974	-0.454528	0.533951	NA	12.3869	7.74937
1700034J05Rik	48.1186	16.5392	25.4223	27.9307	32.9769	46.2035	17.4358	0.148918	0.724671	0.899562	30.0267	31.1368
1700034P13Rik	4.37442	2.06741	5.08447	3.10341	0	4.40034	2.17948	-0.630524	0.615388	NA	3.8421	2.42081
1700037C18Rik	39.3698	37.2133	25.4223	21.7239	23.9832	13.201	10.8974	-1.01354	0.024213	0.148567	34.0018	17.4514
1700037H04Rik	85.3012	117.842	127.112	99.3093	110.922	110.008	119.871	0.000208588	0.999203	0.999921	110.085	110.028
1700040L02Rik	17.4977	12.4044	11.8638	9.31024	11.9916	11.0008	19.6153	-0.0670875	0.90311	0.968221	13.922	12.9795
1700042G15Rik	6.56163	6.20222	3.38965	0	0	0	6.53844	-1.40466	0.196338	NA	5.3845	1.63461
1700047A11Rik	13.1233	4.13481	10.1689	3.10341	8.9937	13.201	6.53844	-0.15414	0.8205	NA	9.14233	7.95914
1700047G03Rik	8.74884	0	10.1689	12.4137	20.9853	8.80067	6.53844	0.912684	0.236926	NA	6.30592	12.1845
1700048M11Rik	10.936	2.06741	5.08447	12.4137	2.9979	4.40034	4.35896	0.0571052	0.94672	NA	6.02931	6.04271
1700048O20Rik	6.56163	12.4044	18.6431	6.20683	14.9895	24.2019	15.2564	0.279285	0.630427	0.852839	12.5364	15.1636
1700049G17Rik	183.726	165.392	138.975	117.93	113.92	182.614	167.82	-0.139299	0.471346	0.759947	162.698	145.571
1700052K11Rik	41.557	53.7525	66.0981	65.1717	35.9748	74.8057	56.6665	0.139121	0.615862	0.844242	53.8025	58.1547
1700056E22Rik	4.37442	2.06741	3.38965	3.10341	0	2.20017	4.35896	-0.395184	0.72857	NA	3.27716	2.41564
1700061G19Rik	8.74884	4.13481	1.69482	0	8.9937	6.60051	6.53844	0.267908	0.772161	NA	4.85949	5.53316
1700065J18Rik	4.37442	2.06741	0	0	2.9979	0	2.17948	-0.461877	0.795991	NA	2.14727	1.29435
1700066B19Rik	4.37442	14.4718	18.6431	3.10341	38.9727	19.8015	17.4358	0.725264	0.19414	0.502075	12.4964	19.8284
1700066M21Rik	131.233	126.112	144.06	161.378	122.914	110.008	137.307	-0.0301533	0.865997	0.954569	133.801	132.902
1700067G17Rik	0	2.06741	3.38965	0	0	4.40034	0	-0.380269	0.800345	NA	1.81902	1.10008
1700067K01Rik	8.74884	4.13481	5.08447	9.31024	2.9979	8.80067	4.35896	0.139866	0.854586	NA	5.98937	6.36694
1700071M16Rik	19.6849	8.26962	13.5586	15.5171	26.9811	17.6013	17.4358	0.484993	0.326461	0.649587	13.8377	19.3838
1700084C01Rik	6.56163	0	1.69482	6.20683	0	0	0	-0.972363	0.547222	NA	2.75215	1.55171
1700084E18Rik	10.936	6.20222	3.38965	9.31024	5.9958	6.60051	6.53844	0.0643444	0.934776	NA	6.84264	7.11125
1700084J12Rik	10.936	10.337	5.08447	3.10341	2.9979	0	2.17948	-2.14878	0.0538241	NA	8.78585	2.0702
1700086O06Rik	54.6802	47.5503	40.6757	55.8615	41.9706	37.4029	45.7691	-0.0756827	0.792143	0.925068	47.6354	45.251
1700088E04Rik	0	2.06741	8.47411	9.31024	8.9937	4.40034	4.35896	0.850441	0.370716	NA	3.51384	6.76581
1700092M07Rik	8.74884	8.26962	3.38965	3.10341	0	11.0008	2.17948	-0.648175	0.475228	NA	6.8027	4.07093
1700093K21Rik	6.56163	4.13481	1.69482	3.10341	0	0	4.35896	-0.988948	0.4193	NA	4.13042	1.86559
1700094D03Rik	94.05	66.157	74.5722	55.8615	65.9538	99.0076	71.9229	-0.0637018	0.80791	0.931381	78.2597	73.1864
1700094J05Rik	0	2.06741	0	0	0	0	2.17948	0.155385	0.931296	NA	0.689135	0.54487
1700095J12Rik	4.37442	12.4044	8.47411	15.5171	11.9916	19.8015	15.2564	0.899795	0.134413	0.414327	8.41765	15.6416
1700096K18Rik	30.6209	24.8089	13.5586	21.7239	20.9853	26.402	17.4358	-0.0519807	0.89669	0.965486	22.9961	21.6368
1700099I09Rik	13.1233	0	20.3379	21.7239	17.9874	4.40034	13.0769	0.225114	0.731105	0.902468	11.1537	14.2971
1700101E01Rik	2.18721	0	0	0	2.9979	2.20017	2.17948	1.47736	0.366665	NA	0.72907	1.84439
1700101I11Rik	0	2.06741	0	0	2.9979	0	0	0.108079	0.957628	NA	0.689135	0.749475
1700102H20Rik	10.936	10.337	1.69482	0	0	2.20017	2.17948	-2.45181	0.0326585	NA	7.65597	1.09491
1700102P08Rik	2.18721	6.20222	8.47411	6.20683	5.9958	4.40034	6.53844	0.0454478	0.954793	NA	5.62118	5.78535
1700105P06Rik	6.56163	4.13481	0	9.31024	2.9979	4.40034	0	0.268248	0.811691	NA	3.56548	4.17712
1700108F19Rik	2.18721	0	1.69482	6.20683	0	2.20017	2.17948	0.995697	0.506743	NA	1.29401	2.64662
1700108J01Rik	0	2.06741	1.69482	6.20683	0	0	2.17948	0.672932	0.661771	NA	1.25408	2.09658
1700109G15Rik	2.18721	4.13481	0	0	0	2.20017	2.17948	-0.610211	0.721838	NA	2.10734	1.09491
1700109H08Rik	50.3058	24.8089	33.8965	37.241	32.9769	24.2019	30.5127	-0.211335	0.538667	0.799945	36.337	31.2331
1700109K24Rik	100.612	28.9437	38.9809	34.1376	38.9727	44.0034	52.3075	-0.260059	0.441069	0.737429	56.1787	42.3553
1700110C19Rik	2.18721	2.06741	1.69482	6.20683	5.9958	6.60051	8.71792	1.82748	0.0853313	NA	1.98315	6.88026
1700110K17Rik	13.1233	10.337	3.38965	6.20683	0	8.80067	4.35896	-0.728329	0.358041	NA	8.94998	4.84162
1700112E06Rik	6.56163	12.4044	5.08447	15.5171	23.9832	35.2027	21.7948	1.62865	0.00452507	0.0471056	8.01684	24.1244
1700112J16Rik	2.18721	12.4044	11.8638	0	2.9979	6.60051	2.17948	-1.46168	0.0861339	NA	8.81847	2.94447
1700113A16Rik	48.1186	70.2918	50.8447	71.3785	74.9475	77.0059	67.5639	0.371111	0.149828	0.439716	56.4184	72.724
1700119H24Rik	17.4977	2.06741	1.69482	6.20683	11.9916	6.60051	2.17948	0.245892	0.77	NA	7.08663	6.7446
1700120C14Rik	2.18721	0	0	0	0	0	0	-0.451052	0.84388	NA	0.72907	0
1700120E14Rik	17.4977	6.20222	13.5586	18.6205	14.9895	4.40034	10.8974	-0.0539009	0.928542	0.97525	12.4195	12.2269
1700120G07Rik	2.18721	2.06741	1.69482	0	0	0	2.17948	-1.33835	0.422077	NA	1.98315	0.54487
1700120K04Rik	15.3105	4.13481	6.77929	3.10341	8.9937	8.80067	15.2564	0.179381	0.789135	NA	8.74152	9.03854
1700123I01Rik	2.18721	0	0	0	0	2.20017	0	0.225808	0.913012	NA	0.72907	0.550042
1700123M08Rik	8.74884	8.26962	8.47411	12.4137	11.9916	4.40034	4.35896	-0.115874	0.867844	NA	8.49752	8.29114
1700123O20Rik	209.972	289.437	266.087	186.205	209.853	167.213	224.486	-0.372253	0.0128795	0.0974634	255.165	196.939
1700124L16Rik	0	0	0	0	2.9979	2.20017	4.35896	2.76772	0.0909973	NA	0	2.38926
1700125H03Rik	4.37442	2.06741	1.69482	3.10341	2.9979	2.20017	8.71792	0.777639	0.479221	NA	2.71222	4.25485
1700126H18Rik	6.56163	2.06741	0	0	2.9979	2.20017	0	-1.07072	0.4901	NA	2.87634	1.29952
1810006J02Rik	0	0	3.38965	0	2.9979	0	0	-0.605458	0.727503	NA	1.12988	0.749475
1810009A15Rik	0	4.13481	0	0	2.9979	2.20017	4.35896	1.10162	0.478331	NA	1.37827	2.38926
1810010D01Rik	8.74884	0	10.1689	0	0	11.0008	2.17948	-0.89831	0.438666	NA	6.30592	3.29508
1810010H24Rik	8.74884	6.20222	13.5586	9.31024	14.9895	11.0008	10.8974	0.255991	0.679608	0.875718	9.50321	11.5495
1810011H11Rik	39.3698	41.3481	47.455	46.5512	41.9706	30.8024	23.9743	-0.293282	0.389608	0.700049	42.7243	35.8246
1810011O10Rik	452.752	411.414	532.174	633.097	725.492	770.059	642.947	0.57348	3.10789e-05	0.00106369	465.447	692.899
1810012K16Rik	10.936	4.13481	1.69482	9.31024	8.9937	4.40034	6.53844	0.449696	0.57528	NA	5.58856	7.31068
1810013A23Rik	19.6849	6.20222	8.47411	9.31024	2.9979	2.20017	4.35896	-1.22534	0.141225	NA	11.4537	4.71682
1810013L24Rik	828.952	738.064	720.3	831.715	734.486	730.456	751.921	0.000296611	0.997681	0.999503	762.439	762.144
1810014B01Rik	41.557	35.1459	52.5395	52.758	26.9811	33.0025	45.7691	-0.134553	0.661227	0.86745	43.0808	39.6277
1810019D21Rik	185.913	111.64	76.267	158.274	152.893	138.611	132.948	0.263543	0.248494	0.571785	124.607	145.681
1810020O05Rik	4.37442	4.13481	0	0	0	0	0	-2.41906	0.130461	NA	2.83641	0
1810021B22Rik	21.8721	22.7415	16.9482	3.10341	14.9895	13.201	15.2564	-0.759396	0.148402	0.43742	20.5206	11.6376
1810022K09Rik	310.584	231.549	286.425	291.721	293.794	272.821	228.845	-0.031126	0.851737	0.949977	276.186	271.795
1810024B03Rik	4.37442	4.13481	5.08447	3.10341	2.9979	4.40034	8.71792	0.136463	0.874244	NA	4.53123	4.80489
1810026B05Rik	487.748	260.493	310.153	288.618	347.756	310.224	339.999	-0.0937906	0.552503	0.808336	352.798	321.649
1810026J23Rik	345.579	504.447	444.044	425.168	419.706	352.027	387.948	-0.125702	0.32931	0.652895	431.357	396.212
1810030O07Rik	308.397	411.414	389.809	437.581	377.735	360.828	403.204	0.0873032	0.511757	0.78579	369.873	394.837
1810032O08Rik	133.42	121.977	145.755	96.2058	122.914	116.609	119.871	-0.227427	0.23738	0.556987	133.717	113.9
1810034E14Rik	24.0593	12.4044	25.4223	27.9307	29.979	13.201	15.2564	0.00441915	0.99222	0.997673	20.6287	21.5918
1810037I17Rik	317.145	274.965	298.289	195.515	206.855	228.818	244.102	-0.426739	0.00524534	0.0520595	296.8	218.822
1810041H14Rik	2.18721	2.06741	8.47411	6.20683	14.9895	2.20017	2.17948	0.441913	0.62951	NA	4.24291	6.39399
1810043G02Rik	249.342	243.954	267.782	294.824	326.771	303.623	283.332	0.251696	0.100939	0.352779	253.693	302.138
1810043H04Rik	32.8081	35.1459	35.5913	27.9307	20.9853	26.402	15.2564	-0.614224	0.0969399	0.34545	34.5151	22.6436
1810044D09Rik	10.936	14.4718	13.5586	9.31024	17.9874	8.80067	10.8974	-0.136426	0.799277	0.928227	12.9888	11.7489
1810055G02Rik	131.233	107.505	79.6567	111.723	107.924	94.6073	98.0766	-0.0262775	0.908003	0.970132	106.131	103.083
1810058I24Rik	131.233	192.269	130.501	145.86	131.908	180.414	148.205	0.0210358	0.910551	0.970582	151.334	151.597
1810062G17Rik	30.6209	4.13481	18.6431	18.6205	11.9916	15.4012	6.53844	-0.464324	0.39119	0.701438	17.7996	13.1379
1810062O18Rik	4.37442	2.06741	6.77929	0	5.9958	8.80067	4.35896	0.15178	0.875933	NA	4.40704	4.78886
1810064F22Rik	6.56163	2.06741	8.47411	9.31024	8.9937	6.60051	4.35896	0.279974	0.708652	NA	5.70105	7.31585
2010001A14Rik	19.6849	12.4044	27.1172	34.1376	20.9853	6.60051	15.2564	-0.117191	0.80531	0.930575	19.7355	19.2449
2010001E11Rik	2.18721	2.06741	0	0	5.9958	4.40034	2.17948	1.27956	0.343823	NA	1.4182	3.1439
2010003K11Rik	15.3105	12.4044	20.3379	3.10341	2.9979	6.60051	2.17948	-2.11457	0.00614306	0.0585272	16.0176	3.72033
2010009K17Rik	10.936	10.337	3.38965	6.20683	0	2.20017	2.17948	-1.64574	0.0921649	NA	8.22091	2.64662
2010012O05Rik	96.2372	99.2355	96.6049	108.62	62.9559	72.6056	93.7177	-0.209897	0.332285	0.655476	97.3592	84.4747
2010016I18Rik	19.6849	6.20222	10.1689	12.4137	5.9958	35.2027	6.53844	0.413163	0.492537	0.773392	12.0187	15.0376
2010106C02Rik	6.56163	0	5.08447	0	8.9937	6.60051	2.17948	0.239533	0.811084	NA	3.88203	4.44342
2010107E04Rik	688.971	591.278	713.52	347.582	329.769	376.229	466.409	-0.7971	9.40762e-08	8.44437e-06	664.59	379.997
2010107G12Rik	6.56163	2.06741	5.08447	3.10341	2.9979	4.40034	2.17948	-0.458097	0.681696	NA	4.57117	3.17028
2010107G23Rik	61.2419	76.494	88.1308	58.9649	47.9664	77.0059	93.7177	-0.0634457	0.805564	0.930652	75.2889	69.4137
2010109A12Rik	17.4977	6.20222	6.77929	9.31024	14.9895	13.201	8.71792	0.236894	0.707868	0.890183	10.1597	11.5547
2010109I03Rik	2.18721	4.13481	6.77929	0	5.9958	2.20017	4.35896	-0.478758	0.644145	NA	4.3671	3.13873
2010111I01Rik	1104.54	642.963	642.338	751.026	725.492	708.454	690.895	-0.114254	0.373731	0.68879	796.614	718.967
2010204K13Rik	8.74884	2.06741	6.77929	0	5.9958	4.40034	2.17948	-0.890454	0.326132	NA	5.86518	3.1439
2010300C02Rik	448.378	475.503	493.193	521.374	533.626	433.433	446.793	0.0255297	0.815297	0.934155	472.358	483.807
2010310C07Rik	4.37442	6.20222	0	0	0	0	4.35896	-1.39135	0.309031	NA	3.52554	1.08974
2010315B03Rik	658.35	479.638	472.856	462.409	434.696	453.235	518.716	-0.179399	0.151033	0.441174	536.948	467.264
2010320M18Rik	89.6756	90.9658	79.6567	68.2751	68.9517	70.4054	78.4613	-0.257497	0.271768	0.597387	86.766	71.5234
2200002D01Rik	30.6209	28.9437	25.4223	43.4478	32.9769	30.8024	21.7948	0.170562	0.643424	0.859183	28.329	32.2555
2210013O21Rik	122.484	171.595	145.755	130.343	107.924	132.01	143.846	-0.187132	0.292588	0.621031	146.611	128.531
2210015D19Rik	85.3012	90.9658	108.469	86.8956	98.9307	68.2052	69.7434	-0.263058	0.217545	0.533295	94.9119	80.9437
2210016F16Rik	321.52	421.751	371.166	378.617	353.752	332.225	311.666	-0.115986	0.412051	0.716302	371.479	344.065
2210016L21Rik	111.548	152.988	132.196	152.067	137.903	147.411	135.128	0.129132	0.472859	0.760607	132.244	143.127
2210018M11Rik	345.579	316.313	328.796	356.893	407.714	429.033	363.973	0.239447	0.0488181	0.231741	330.229	389.403
2210039B01Rik	10.936	4.13481	3.38965	9.31024	2.9979	6.60051	0	-0.295214	0.746764	NA	6.1535	4.72716
2210404O09Rik	83.114	64.0896	57.624	52.758	47.9664	48.4037	98.0766	-0.105494	0.696416	0.883701	68.2758	61.8012
2210406O10Rik	2.18721	2.06741	5.08447	12.4137	8.9937	8.80067	10.8974	1.89032	0.0233731	NA	3.11303	10.2764
2210408F21Rik	45.9314	33.0785	35.5913	31.0341	17.9874	17.6013	19.6153	-0.837427	0.0296641	0.169143	38.2004	21.5596
2210408I21Rik	216.534	142.651	106.774	142.757	125.912	94.6073	132.948	-0.287906	0.123964	0.395973	155.32	124.056
2210409D07Rik	0	0	3.38965	0	0	2.20017	0	-0.378059	0.840052	NA	1.12988	0.550042
2210416O15Rik	2.18721	2.06741	1.69482	12.4137	11.9916	8.80067	10.8974	2.48765	0.0162719	NA	1.98315	11.0258
2210417A02Rik	0	0	1.69482	3.10341	5.9958	0	0	1.54778	0.412673	NA	0.564941	2.2748
2300009A05Rik	37.1826	51.6851	35.5913	68.2751	47.9664	22.0017	21.7948	-0.127013	0.704049	0.88757	41.4863	40.0095
2310001H17Rik	115.922	72.3592	72.8774	68.2751	47.9664	50.6039	80.6408	-0.451195	0.0704821	0.290477	87.0529	61.8715
2310001K24Rik	0	0	1.69482	3.10341	0	2.20017	2.17948	1.443	0.381164	NA	0.564941	1.87077
2310002F09Rik	0	0	3.38965	0	0	2.20017	4.35896	0.509263	0.739593	NA	1.12988	1.63978
2310002L09Rik	0	8.26962	22.0327	0	0	0	0	-3.89292	0.0137577	NA	10.1008	0
2310007B03Rik	0	0	1.69482	3.10341	2.9979	2.20017	2.17948	1.88534	0.231871	NA	0.564941	2.62024
2310009A05Rik	113.735	99.2355	94.9101	102.413	83.9412	79.2061	69.7434	-0.304819	0.136659	0.418811	102.627	83.8258
2310009B15Rik	59.0547	41.3481	35.5913	46.5512	38.9727	44.0034	47.9486	-0.00756605	0.980564	0.994173	45.3313	44.369
2310010G23Rik	8.74884	2.06741	0	12.4137	0	6.60051	6.53844	1.06916	0.2518	NA	3.60541	6.38815
2310010J17Rik	17.4977	6.20222	11.8638	15.5171	17.9874	13.201	21.7948	0.549198	0.301091	0.628517	11.8546	17.1251
2310011J03Rik	271.214	281.167	291.51	325.859	221.845	211.216	209.23	-0.232736	0.207547	0.520227	281.297	242.037
2310015A10Rik	166.228	97.168	132.196	136.55	161.887	184.814	165.641	0.31364	0.0944969	0.340371	131.864	162.223
2310015D24Rik	0	2.06741	5.08447	0	0	0	2.17948	-1.4803	0.38684	NA	2.38396	0.54487
2310022A10Rik	52.493	62.0222	62.7084	83.7922	95.9328	41.8032	58.846	0.21324	0.431927	0.730711	59.0745	70.0935
2310022B05Rik	181.538	194.336	171.177	220.342	242.83	248.619	222.307	0.363277	0.0139384	0.103339	182.351	233.525
2310030G06Rik	78.7395	82.6962	96.6049	111.723	119.916	74.8057	74.1023	0.117268	0.618531	0.84541	86.0135	95.1367
2310033P09Rik	137.794	103.37	77.9619	86.8956	80.9433	96.8074	84.9997	-0.267573	0.248971	0.572284	106.375	87.4115
2310034G01Rik	63.4291	47.5503	45.7602	40.3444	38.9727	48.4037	41.4101	-0.278849	0.353633	0.672133	52.2465	42.2827
2310035C23Rik	1395.44	1186.69	1057.57	1142.06	971.32	1001.08	1113.71	-0.187013	0.069044	0.286286	1213.23	1057.04
2310036O22Rik	312.771	361.796	342.354	372.41	332.767	347.627	383.589	0.085714	0.478769	0.763801	338.974	359.098
2310039H08Rik	159.666	136.449	125.417	114.826	125.912	99.0076	87.1792	-0.407425	0.0354838	0.189496	140.511	106.731
2310040G24Rik	4.37442	10.337	18.6431	9.31024	14.9895	15.4012	6.53844	0.0878404	0.877844	0.958993	11.1182	11.5598
2310045N01Rik	264.652	235.684	225.411	220.342	296.792	228.818	220.128	-0.00539384	0.973073	0.991956	241.916	241.52
2310047M10Rik	39.3698	78.5614	59.3188	62.0683	101.929	52.804	54.487	0.188571	0.501874	0.778296	59.0833	67.822
2310057J18Rik	6.56163	0	0	0	0	2.20017	2.17948	-0.400966	0.789411	NA	2.18721	1.09491
2310057M21Rik	89.6756	68.2244	61.0136	55.8615	41.9706	72.6056	52.3075	-0.354365	0.155033	0.447269	72.9712	55.6863
2310061I04Rik	65.6163	68.2244	64.4033	65.1717	59.958	63.8049	37.0512	-0.243789	0.370043	0.686116	66.0813	56.4964
2310067B10Rik	542.428	684.311	540.648	682.751	575.597	668.851	551.409	0.0745909	0.603638	0.838046	589.129	619.652
2310068J16Rik	0	0	1.69482	6.20683	8.9937	4.40034	6.53844	3.18659	0.0195952	NA	0.564941	6.53483
2310069B03Rik	0	2.06741	3.38965	0	0	0	0	-1.81489	0.261899	NA	1.81902	0
2310069G16Rik	0	0	1.69482	0	0	2.20017	0	0.167289	0.930449	NA	0.564941	0.550042
2400006E01Rik	39.3698	20.6741	15.2534	18.6205	23.9832	17.6013	15.2564	-0.3375	0.47877	0.763801	25.0991	18.8654
2410002F23Rik	402.447	452.762	435.569	518.27	539.622	561.043	424.999	0.246694	0.085909	0.324208	430.259	510.983
2410004B18Rik	150.917	144.718	118.638	96.2058	122.914	96.8074	78.4613	-0.49242	0.0117097	0.0917235	138.091	98.5971
2410004P03Rik	0	2.06741	5.08447	0	2.9979	0	0	-1.53022	0.382664	NA	2.38396	0.749475
2410006H16Rik	382.762	324.583	342.354	273.1	281.803	301.423	294.23	-0.283034	0.142762	0.429219	349.899	287.639
2410015M20Rik	524.93	485.84	494.888	304.135	350.754	332.225	381.409	-0.543775	3.86886e-05	0.00126353	501.886	342.131
2410016O06Rik	111.548	254.291	166.093	179.998	131.908	147.411	146.025	-0.188583	0.378636	0.692984	177.31	151.336
2410018L13Rik	0	0	0	0	0	4.40034	2.17948	2.181	0.270207	NA	0	1.64495
2410021H03Rik	4.37442	2.06741	5.08447	6.20683	2.9979	6.60051	2.17948	0.197947	0.848229	NA	3.8421	4.49618
2410089E03Rik	533.679	430.02	391.504	453.098	368.742	547.842	608.075	0.146372	0.33169	0.654937	451.734	494.439
2410127L17Rik	59.0547	86.831	64.4033	74.4819	89.937	55.0042	65.3844	-0.000502303	0.998307	0.999918	70.0963	71.2019
2410131K14Rik	135.607	175.729	142.365	179.998	155.891	171.613	117.692	0.0465097	0.817534	0.934946	151.234	156.298
2500002B13Rik	13.1233	12.4044	20.3379	15.5171	14.9895	13.201	15.2564	-0.0797786	0.871824	0.956614	15.2885	14.741
2500004C02Rik	52.493	47.5503	37.2861	37.241	32.9769	33.0025	52.3075	-0.211827	0.506309	0.781447	45.7765	38.882
2510002D24Rik	111.548	99.2355	133.891	83.7922	92.9349	92.4071	95.8971	-0.332476	0.0910295	0.33278	114.891	91.2578
2510003B16Rik	2.18721	2.06741	3.38965	3.10341	5.9958	2.20017	6.53844	0.796993	0.452337	NA	2.54809	4.45946
2510009E07Rik	341.205	434.155	420.316	437.581	464.675	435.633	518.716	0.217169	0.0647274	0.275691	398.559	464.151
2510039O18Rik	380.574	547.862	398.283	527.58	500.649	429.033	431.537	0.0985428	0.464327	0.75331	442.24	472.2
2610001J05Rik	120.297	121.977	127.112	96.2058	140.901	88.0067	139.487	-0.0889632	0.657774	0.865818	123.128	116.15
2610002M06Rik	360.89	372.133	467.771	344.479	332.767	440.034	407.563	-0.0735373	0.623158	0.8479	400.265	381.211
2610005L07Rik	109.36	55.8199	74.5722	74.4819	59.958	103.408	58.846	-0.0783627	0.744131	0.908053	79.9175	74.1735
2610008E11Rik	422.131	332.852	401.673	384.823	416.708	488.437	444.614	0.173047	0.159496	0.453961	385.552	433.646
2610015P09Rik	148.73	111.64	138.975	124.137	155.891	173.813	141.666	0.166189	0.369425	0.685622	133.115	148.877
2610016A17Rik	21.8721	12.4044	18.6431	37.241	35.9748	61.6047	28.3332	1.21522	0.00654449	0.0611712	17.6399	40.7884
2610020C07Rik	52.493	26.8763	30.5068	68.2751	20.9853	48.4037	39.2306	0.316834	0.376015	0.691201	36.6254	44.2237
2610020H08Rik	129.045	97.168	110.163	108.62	101.929	127.61	139.487	0.109286	0.575493	0.820871	112.126	119.411
2610027K06Rik	17.4977	6.20222	11.8638	9.31024	2.9979	22.0017	2.17948	-0.300247	0.689844	NA	11.8546	9.12233
2610035D17Rik	74.3651	109.572	59.3188	62.0683	80.9433	114.409	37.0512	-0.124115	0.681545	0.876253	81.0855	73.6179
2610037D02Rik	10.936	4.13481	5.08447	3.10341	8.9937	4.40034	2.17948	-0.492398	0.566161	NA	6.71844	4.66923
2610042L04Rik	0	0	1.69482	3.10341	0	0	2.17948	0.867798	0.618782	NA	0.564941	1.32072
2610044O15Rik8	194.662	124.044	135.586	83.7922	101.929	147.411	143.846	-0.295707	0.127021	0.401979	151.431	119.244
2610100L16Rik	4.37442	0	1.69482	0	0	0	0	-1.90598	0.254792	NA	2.02308	0
2610203C22Rik	39.3698	35.1459	18.6431	52.758	29.979	37.4029	34.8717	0.349935	0.31638	0.64177	31.0529	38.7529
2610206C17Rik	8.74884	2.06741	1.69482	9.31024	2.9979	6.60051	4.35896	0.574022	0.539987	NA	4.17036	5.8169
2610301B20Rik	107.173	93.0332	113.553	86.8956	89.937	85.8066	111.154	-0.165274	0.44771	0.742041	104.587	93.4482
2610305D13Rik	102.799	72.3592	86.436	68.2751	62.9559	83.6064	111.154	-0.0752641	0.747166	0.908345	87.198	81.4977
2610306M01Rik	21.8721	35.1459	32.2016	27.9307	20.9853	15.4012	32.6922	-0.274914	0.472766	0.760607	29.7399	24.2524
2610307P16Rik	179.351	59.9548	162.703	127.24	125.912	173.813	176.538	0.197409	0.481157	0.765421	134.003	150.876
2610316D01Rik	4.37442	8.26962	1.69482	6.20683	0	11.0008	4.35896	0.257375	0.774171	NA	4.77962	5.39166
2610318N02Rik	2.18721	2.06741	3.38965	0	0	0	2.17948	-1.72234	0.310459	NA	2.54809	0.54487
2610507B11Rik	4700.31	5542.71	4999.73	5629.59	5396.22	4871.17	4823.19	0.0244292	0.700955	0.886018	5080.92	5180.04
2610507I01Rik	395.885	351.459	259.308	322.755	275.807	343.226	309.486	-0.0755644	0.573241	0.819949	335.551	312.819
2610524H06Rik	56.8674	20.6741	42.3706	43.4478	35.9748	59.4046	52.3075	0.296049	0.335082	0.657522	39.9707	47.7837
2610528A11Rik	13.1233	8.26962	0	18.6205	8.9937	15.4012	15.2564	1.15286	0.0836053	0.318701	7.13096	14.5679
2610528J11Rik	87.4884	121.977	64.4033	55.8615	62.9559	70.4054	32.6922	-0.697795	0.00451348	0.0470536	91.2895	55.4787
2700029M09Rik	166.228	190.201	222.022	198.619	191.866	169.413	241.922	0.0512306	0.76764	0.914879	192.817	200.455
2700038G22Rik	56.8674	49.6177	40.6757	68.2751	38.9727	41.8032	54.487	0.0561599	0.844294	0.946639	49.0536	50.8845
2700046A07Rik	2.18721	0	3.38965	3.10341	5.9958	0	2.17948	0.474629	0.71225	NA	1.85895	2.81967
2700046G09Rik	32.8081	12.4044	33.8965	21.7239	14.9895	33.0025	26.1538	-0.114087	0.771917	0.916997	26.3697	23.9674
2700049A03Rik	343.392	305.976	281.341	294.824	305.786	316.824	359.614	0.0539452	0.675298	0.874025	310.236	319.262
2700054A10Rik	37.1826	28.9437	42.3706	21.7239	35.9748	22.0017	23.9743	-0.518195	0.141974	0.427659	36.1656	25.9187
2700060E02Rik	1419.5	1209.43	1333.83	1058.26	1175.18	924.071	1118.07	-0.309985	0.00492917	0.0501777	1320.92	1068.9
2700062C07Rik	122.484	138.516	115.248	121.033	182.872	132.01	117.692	0.134573	0.477212	0.763386	125.416	138.402
2700081O15Rik	216.534	252.223	213.548	322.755	266.813	332.225	244.102	0.359876	0.0162132	0.114665	227.435	291.474
2700094K13Rik	83.114	86.831	123.722	71.3785	44.9685	79.2061	93.7177	-0.4154	0.0832645	0.317741	97.889	72.3177
2700097O09Rik	56.8674	70.2918	71.1826	58.9649	44.9685	39.603	50.128	-0.481576	0.0805668	0.312884	66.1139	48.4161
2700099C18Rik	80.9267	26.8763	27.1172	52.758	38.9727	35.2027	52.3075	0.0869672	0.804865	0.930425	44.9734	44.8102
2810001G20Rik	63.4291	86.831	64.4033	37.241	56.9601	44.0034	58.846	-0.527693	0.0533511	0.245226	71.5545	49.2626
2810002D19Rik	52.493	64.0896	47.455	31.0341	50.9643	33.0025	39.2306	-0.513004	0.0781325	0.307753	54.6792	38.5579
2810004N23Rik	286.524	419.683	303.373	344.479	428.7	343.226	346.537	0.124682	0.379902	0.693793	336.527	365.736
2810006K23Rik	43.7442	70.2918	59.3188	40.3444	65.9538	74.8057	71.9229	0.148877	0.554025	0.809153	57.7849	63.2567
2810013P06Rik	209.972	111.64	108.469	148.964	134.906	123.209	154.743	0.0083904	0.966243	0.989845	143.36	140.455
2810021J22Rik	96.2372	105.438	111.858	108.62	71.9496	83.6064	95.8971	-0.221529	0.302064	0.629265	104.511	90.0182
2810025M15Rik	72.1779	78.5614	74.5722	65.1717	71.9496	72.6056	71.9229	-0.0889393	0.692735	0.881877	75.1038	70.4124
2810029C07Rik	6.56163	6.20222	5.08447	6.20683	2.9979	4.40034	10.8974	0.0872235	0.910931	NA	5.94944	6.12562
2810032G03Rik	104.986	95.1006	59.3188	96.2058	53.9622	37.4029	41.4101	-0.627584	0.012328	0.0950032	86.4685	57.2453
2810047C21Rik1	2.18721	6.20222	1.69482	6.20683	5.9958	2.20017	0	0.0882528	0.935992	NA	3.36142	3.6007
2810403A07Rik	1071.73	961.343	860.97	1070.68	1139.2	1144.09	1150.77	0.230793	0.0120514	0.0934766	964.682	1126.18
2810403D21Rik	59.0547	31.0111	22.0327	21.7239	17.9874	22.0017	43.5896	-0.409519	0.353539	0.672096	37.3661	26.3256
2810408A11Rik	37.1826	41.3481	50.8447	65.1717	65.9538	63.8049	65.3844	0.628942	0.0206805	0.134038	43.1251	65.0787
2810408I11Rik	19.6849	28.9437	6.77929	18.6205	5.9958	11.0008	15.2564	-0.469087	0.36804	0.683942	18.4693	12.7184
2810410L24Rik	54.6802	20.6741	20.3379	49.6546	53.9622	57.2044	54.487	0.805226	0.0217747	0.138606	31.8974	53.8271
2810417H13Rik	164.041	183.999	264.392	198.619	197.861	235.418	307.307	0.206481	0.302569	0.63	204.144	234.801
2810428I15Rik	78.7395	109.572	96.6049	96.2058	53.9622	88.0067	54.487	-0.376291	0.170334	0.469669	94.9723	73.1655
2810429I04Rik	6.56163	6.20222	6.77929	6.20683	8.9937	6.60051	8.71792	0.22056	0.758839	NA	6.51438	7.62974
2810433D01Rik	15.3105	8.26962	11.8638	3.10341	0	15.4012	8.71792	-0.698446	0.2979	NA	11.8146	6.80563
2810442N19Rik	17.4977	12.4044	11.8638	6.20683	2.9979	8.80067	2.17948	-1.42786	0.05186	NA	13.922	5.04622
2810454H06Rik	37.1826	26.8763	28.812	24.8273	44.9685	35.2027	50.128	0.349085	0.310244	0.636728	30.9569	38.7816
2810459M11Rik	89.6756	97.168	132.196	74.4819	101.929	114.409	165.641	0.117504	0.623297	0.847936	106.347	114.115
2810468N07Rik	21.8721	39.2807	40.6757	34.1376	41.9706	30.8024	37.0512	0.0791319	0.852097	0.95002	33.9428	35.9904
2810474O19Rik	1332.01	1013.03	1103.33	1700.67	1651.84	1542.32	1421.02	0.461891	0.000107632	0.00293713	1149.46	1578.96
2900005J15Rik	26.2465	26.8763	23.7275	34.1376	29.979	55.0042	54.487	0.802316	0.0222498	0.140571	25.6168	43.4019
2900008C10Rik	6.56163	0	1.69482	9.31024	2.9979	4.40034	4.35896	0.967082	0.353372	NA	2.75215	5.26686
2900009J06Rik	0	0	1.69482	0	0	2.20017	0	0.178497	0.922571	NA	0.564941	0.550042
2900011O08Rik	4.37442	0	3.38965	0	0	2.20017	6.53844	-0.0702126	0.958493	NA	2.58802	2.18465
2900026A02Rik	472.437	479.638	520.311	772.75	659.538	710.654	695.254	0.531124	2.05611e-06	0.000109088	490.795	709.549
2900041M22Rik	4.37442	0	3.38965	0	2.9979	4.40034	8.71792	0.736264	0.518927	NA	2.58802	4.02904
2900052N01Rik	0	0	0	3.10341	2.9979	6.60051	4.35896	3.55105	0.0127259	NA	0	4.2652
2900057B20Rik	15.3105	2.06741	1.69482	6.20683	5.9958	6.60051	4.35896	0.188307	0.829807	NA	6.35756	5.79052
2900060B14Rik	32.8081	14.4718	10.1689	9.31024	11.9916	6.60051	6.53844	-1.08239	0.0509617	0.238214	19.1496	8.6102
2900076A07Rik	85.3012	43.4155	55.9292	83.7922	35.9748	52.804	47.9486	-0.15734	0.586892	0.827762	61.5486	55.1299
2900097C17Rik	1706.02	2100.48	1764.31	1824.81	1858.7	1601.72	1996.4	-0.0302737	0.777596	0.918992	1856.94	1820.41
3000002C10Rik	30.6209	26.8763	23.7275	24.8273	14.9895	26.402	34.8717	-0.045662	0.904514	0.969161	27.0749	25.2726
3010001F23Rik	4.37442	4.13481	5.08447	0	5.9958	4.40034	4.35896	-0.277885	0.774983	NA	4.53123	3.68877
3010026O09Rik	39.3698	35.1459	35.5913	58.9649	53.9622	52.804	84.9997	0.787452	0.00907315	0.0767984	36.7023	62.6827
3110001I22Rik	107.173	70.2918	44.0654	74.4819	35.9748	63.8049	50.128	-0.336296	0.210419	0.523735	73.8435	56.0974
3110002H16Rik	304.022	370.066	354.218	366.203	350.754	305.823	342.178	-0.0092065	0.941992	0.980821	342.769	341.24
3110009E18Rik	15.3105	18.6066	11.8638	24.8273	11.9916	11.0008	10.8974	-0.0798876	0.871067	0.956182	15.2603	14.6793
3110021A11Rik	4.37442	4.13481	3.38965	6.20683	2.9979	8.80067	6.53844	0.683751	0.434279	NA	3.96629	6.13596
3110021N24Rik	41.557	43.4155	38.9809	40.3444	23.9832	35.2027	37.0512	-0.264678	0.39294	0.702355	41.3178	34.1454
3110035E14Rik	21.8721	6.20222	18.6431	27.9307	17.9874	13.201	30.5127	0.51375	0.328169	0.651681	15.5725	22.408
3110039I08Rik	345.579	177.797	183.041	133.447	164.885	180.414	246.281	-0.310502	0.0978198	0.346706	235.472	181.257
3110040N11Rik	150.917	119.91	116.943	77.5854	95.9328	96.8074	84.9997	-0.524468	0.00845678	0.0729717	129.257	88.8313
3110043O21Rik	312.771	221.212	262.698	297.928	263.815	334.426	300.768	0.180438	0.241323	0.561944	265.56	299.234
3110045C21Rik	10.936	2.06741	8.47411	12.4137	0	6.60051	6.53844	-0.152408	0.832207	0.940947	7.15919	6.38815
3110052M02Rik	150.917	95.1006	135.586	80.6888	95.9328	96.8074	139.487	-0.277071	0.165556	0.463873	127.201	103.229
3110056K07Rik	164.041	99.2355	88.1308	114.826	83.9412	74.8057	124.23	-0.199502	0.347085	0.667961	117.136	99.4509
3110057O12Rik	124.671	93.0332	111.858	117.93	65.9538	105.608	93.7177	-0.190691	0.403292	0.71079	109.854	95.8023
3110062M04Rik	59.0547	45.4829	32.2016	46.5512	50.9643	50.6039	63.2049	0.238524	0.445396	0.740264	45.5797	52.8311
3110070M22Rik	4.37442	2.06741	1.69482	6.20683	0	2.20017	0	-0.413958	0.746108	NA	2.71222	2.10175
3110079O15Rik	2.18721	2.06741	6.77929	0	0	4.40034	0	-1.53287	0.355965	NA	3.67797	1.10008
3110082I17Rik	69.9907	57.8873	35.5913	71.3785	80.9433	48.4037	43.5896	0.162825	0.612615	0.842729	54.4898	61.0788
3200001D21Rik	15.3105	14.4718	10.1689	3.10341	11.9916	6.60051	15.2564	-0.468707	0.422899	0.724191	13.3171	9.23797
3300002I08Rik	17.4977	14.4718	23.7275	3.10341	8.9937	8.80067	15.2564	-1.00044	0.074831	0.301351	18.5657	9.03854
3300005D01Rik	0	4.13481	1.69482	3.10341	2.9979	2.20017	2.17948	0.536175	0.688055	NA	1.94321	2.62024
3425401B19Rik	0	68.2244	83.0463	0	0	0	0	-4.86083	0.0395197	0.202035	50.4236	0
3632451O06Rik	43.7442	45.4829	28.812	27.9307	26.9811	50.6039	39.2306	-0.0928836	0.788465	0.924468	39.3464	36.1866
3632454L22Rik	19.6849	10.337	16.9482	21.7239	5.9958	15.4012	6.53844	-0.348379	0.534748	0.797373	15.6567	12.4148
3830403N18Rik	0	0	0	6.20683	8.9937	2.20017	4.35896	3.87683	0.0156845	NA	0	5.43991
3830406C13Rik	308.397	301.841	294.899	257.583	296.792	257.42	329.102	-0.077183	0.594293	0.832499	301.712	285.224
3830408C21Rik	10.936	4.13481	5.08447	3.10341	5.9958	11.0008	2.17948	-0.19845	0.793908	NA	6.71844	5.56988
3830417A13Rik	2.18721	0	0	0	0	0	0	-0.551019	0.754607	NA	0.72907	0
3830432H09Rik	4.37442	0	5.08447	0	2.9979	8.80067	4.35896	0.457165	0.657223	NA	3.15296	4.03938
3930402G23Rik	6.56163	4.13481	8.47411	3.10341	0	0	2.17948	-2.32725	0.0479583	NA	6.39018	1.32072
4430402I18Rik	17.4977	10.337	8.47411	15.5171	2.9979	4.40034	8.71792	-0.607551	0.326014	0.64948	12.1029	7.90831
4631405J19Rik	15.3105	12.4044	15.2534	15.5171	20.9853	11.0008	13.0769	0.0438777	0.932356	0.976912	14.3228	15.145
4632404H12Rik	89.6756	53.7525	64.4033	68.2751	62.9559	79.2061	52.3075	-0.0618593	0.804634	0.930309	69.2771	65.6862
4632415L05Rik	253.716	239.819	232.191	325.859	314.78	275.021	268.076	0.283046	0.0522289	0.242017	241.909	295.934
4632427E13Rik	111.548	68.2244	81.3515	124.137	92.9349	114.409	143.846	0.467472	0.0380825	0.197501	87.0412	118.831
4632428C04Rik	4.37442	10.337	11.8638	3.10341	2.9979	4.40034	10.8974	-0.679822	0.367938	NA	8.8584	5.34976
4632428N05Rik	505.245	647.098	444.044	521.374	512.641	741.457	592.819	0.151045	0.329391	0.652926	532.129	592.073
4732416N19Rik	4.37442	0	5.08447	0	0	8.80067	4.35896	0.117591	0.926187	NA	3.15296	3.28991
4732471J01Rik	45.9314	28.9437	45.7602	96.2058	41.9706	79.2061	47.9486	0.708919	0.0238489	0.147329	40.2118	66.3328
4732490B19Rik	54.6802	26.8763	20.3379	49.6546	23.9832	22.0017	45.7691	0.131007	0.71582	0.894509	33.9648	35.3522
4732491K20Rik	24.0593	18.6066	13.5586	24.8273	41.9706	17.6013	17.4358	0.420009	0.33471	0.657081	18.7415	25.4588
4831440E17Rik	91.8628	62.0222	49.1499	68.2751	56.9601	63.8049	52.3075	-0.139431	0.590646	0.830276	67.6783	60.3369
4833411C07Rik	10.936	12.4044	5.08447	3.10341	11.9916	6.60051	4.35896	-0.527855	0.452978	NA	9.47498	6.51362
4833417C18Rik	13.1233	0	10.1689	0	14.9895	6.60051	8.71792	0.00453823	0.995044	NA	7.76406	7.57698
4833418N02Rik	26.2465	43.4155	30.5068	34.1376	44.9685	28.6022	56.6665	0.322162	0.33021	0.653461	33.3896	41.0937
4833419F23Rik	10.936	4.13481	8.47411	3.10341	0	13.201	6.53844	-0.35873	0.638488	NA	7.84832	5.71072
4833420G17Rik	551.177	576.806	435.569	533.787	479.664	607.247	557.947	0.0681927	0.73125	0.902569	521.184	544.661
4833422C13Rik	48.1186	24.8089	16.9482	15.5171	14.9895	13.201	26.1538	-0.654672	0.175491	0.478069	29.9586	17.4653
4833422M21Rik	4.37442	0	0	0	0	0	2.17948	-0.56126	0.750468	NA	1.45814	0.54487
4833423E24Rik	0	0	1.69482	0	0	2.20017	0	0.182046	0.926343	NA	0.564941	0.550042
4833427F10Rik	2.18721	0	0	3.10341	0	0	6.53844	1.83266	0.239632	NA	0.72907	2.41046
4833439L19Rik	839.888	946.872	989.777	1070.68	1028.28	855.866	954.612	0.0688166	0.47748	0.763518	925.512	977.359
4921504A21Rik	4.37442	0	1.69482	6.20683	5.9958	4.40034	0	1.2133	0.327802	NA	2.02308	4.15074
4921506M07Rik	2.18721	0	1.69482	0	2.9979	6.60051	6.53844	1.77496	0.177998	NA	1.29401	4.03421
4921507L20Rik	34.9953	4.13481	20.3379	31.0341	17.9874	26.402	13.0769	0.237887	0.623885	0.848574	19.8227	22.1251
4921507P07Rik	32.8081	16.5392	25.4223	12.4137	35.9748	19.8015	15.2564	-0.263009	0.550628	0.807017	24.9232	20.8616
4921511C10Rik	67.8035	10.337	32.2016	9.31024	17.9874	19.8015	17.4358	-1.03362	0.0283444	0.164846	36.7807	16.1338
4921511H03Rik	24.0593	8.26962	16.9482	6.20683	0	6.60051	15.2564	-1.15772	0.125901	NA	16.4257	7.01592
4921511I17Rik	13.1233	10.337	8.47411	18.6205	14.9895	8.80067	6.53844	0.187853	0.780458	NA	10.6448	12.2373
4921513I03Rik	13.1233	0	3.38965	6.20683	0	0	0	-1.77148	0.169814	NA	5.5043	1.55171
4921518K17Rik	2.18721	2.06741	5.08447	0	0	2.20017	0	-1.94431	0.247416	NA	3.11303	0.550042
4921524J17Rik	113.735	128.179	135.586	117.93	104.927	101.208	111.154	-0.218902	0.248513	0.571785	125.833	108.804
4921531C22Rik	61.2419	49.6177	61.0136	37.241	35.9748	41.8032	56.6665	-0.390928	0.171479	0.471461	57.2911	42.9214
4921536K21Rik	4.37442	0	8.47411	9.31024	5.9958	8.80067	8.71792	0.864798	0.267218	NA	4.28284	8.20616
4930402H24Rik	616.793	463.099	469.466	527.58	479.664	596.246	682.177	0.163434	0.131688	0.4092	516.453	571.417
4930404H11Rik	4.37442	0	0	3.10341	0	0	0	-0.411023	0.829131	NA	1.45814	0.775854
4930404I05Rik	15.3105	10.337	18.6431	24.8273	14.9895	33.0025	13.0769	0.524204	0.299766	0.626944	14.7635	21.4741
4930404N11Rik	133.42	150.921	113.553	133.447	140.901	92.4071	54.487	-0.367785	0.167668	0.466367	132.631	105.311
4930405A10Rik	8.74884	4.13481	3.38965	9.31024	5.9958	6.60051	2.17948	0.190472	0.826948	NA	5.42443	6.02151
4930405A21Rik	6.56163	10.337	3.38965	3.10341	5.9958	4.40034	4.35896	-0.586578	0.517895	NA	6.76277	4.46463
4930405J17Rik	67.8035	24.8089	15.2534	18.6205	20.9853	13.201	26.1538	-0.653862	0.170019	0.469461	35.9553	19.7401
4930405O22Rik	96.2372	26.8763	25.4223	24.8273	26.9811	35.2027	43.5896	-0.356698	0.351656	0.671083	49.5119	32.6502
4930406D18Rik	0	2.06741	5.08447	0	2.9979	2.20017	0	-1.02521	0.51869	NA	2.38396	1.29952
4930412C18Rik	24.0593	22.7415	10.1689	6.20683	8.9937	19.8015	23.9743	-0.234206	0.608932	0.840908	18.9899	14.7441
4930412O13Rik	273.401	190.201	191.515	269.997	194.864	239.818	246.281	0.13673	0.421704	0.72327	218.372	237.74
4930413F20Rik	28.4337	8.26962	11.8638	18.6205	11.9916	11.0008	6.53844	-0.437199	0.431965	0.730711	16.189	12.0378
4930413G21Rik	10.936	8.26962	3.38965	12.4137	8.9937	13.201	0	0.221422	0.801386	NA	7.53177	8.65209
4930414N06Rik	6.56163	2.06741	8.47411	6.20683	0	4.40034	8.71792	-0.220412	0.80282	NA	5.70105	4.83127
4930415F15Rik	6.56163	0	3.38965	3.10341	5.9958	4.40034	4.35896	0.487181	0.62804	NA	3.31709	4.46463
4930415O20Rik	8.74884	8.26962	8.47411	3.10341	23.9832	11.0008	15.2564	0.65827	0.273742	0.598659	8.49752	13.336
4930426L09Rik	2.18721	2.06741	0	0	2.9979	4.40034	0	0.455645	0.769941	NA	1.4182	1.84956
4930427A07Rik	67.8035	90.9658	99.9945	133.447	143.899	112.209	98.0766	0.502703	0.0150232	0.108894	86.2546	121.908
4930429B21Rik	0	0	3.38965	9.31024	0	6.60051	4.35896	2.00327	0.119296	NA	1.12988	5.06743
4930429F24Rik	15.3105	12.4044	22.0327	15.5171	11.9916	13.201	19.6153	-0.136711	0.788459	0.924468	16.5825	15.0813
4930430F08Rik	45.9314	47.5503	47.455	40.3444	56.9601	41.8032	69.7434	0.154633	0.588149	0.828443	46.9789	52.2128
4930430J02Rik	2.18721	0	1.69482	0	2.9979	2.20017	0	-0.0154557	0.992676	NA	1.29401	1.29952
4930431P03Rik	234.031	148.853	155.924	127.24	113.92	99.0076	111.154	-0.653286	0.00294231	0.0350815	179.603	112.83
4930432K21Rik	19.6849	22.7415	27.1172	31.0341	20.9853	17.6013	23.9743	-0.00851542	0.983897	0.995046	23.1812	23.3988
4930438E09Rik	4.37442	4.13481	8.47411	6.20683	5.9958	0	6.53844	-0.33539	0.709154	NA	5.66111	4.68527
4930443O20Rik	26.2465	10.337	8.47411	15.5171	5.9958	17.6013	13.0769	-0.0885918	0.87543	0.958558	15.0192	13.0478
4930444F02Rik	2.18721	0	0	0	0	2.20017	4.35896	1.39436	0.413056	NA	0.72907	1.63978
4930445N18Rik	0	0	0	0	0	0	0	0	1	NA	0	0
4930447A16Rik	8.74884	2.06741	1.69482	21.7239	14.9895	15.4012	8.71792	1.96933	0.025685	NA	4.17036	15.2081
4930447C04Rik	2.18721	0	1.69482	0	0	0	2.17948	-0.700691	0.704051	NA	1.29401	0.54487
4930447K03Rik	0	4.13481	1.69482	9.31024	0	4.40034	8.71792	1.54853	0.146252	NA	1.94321	5.60713
4930447M23Rik	0	6.20222	0	6.20683	0	0	0	-0.587713	0.700354	NA	2.06741	1.55171
4930447N08Rik	2.18721	0	1.69482	0	0	4.40034	0	-0.0107225	0.995182	NA	1.29401	1.10008
4930449E18Rik	17.4977	8.26962	5.08447	12.4137	5.9958	2.20017	13.0769	-0.16583	0.825072	NA	10.2839	8.42163
4930451G09Rik	168.415	204.673	155.924	226.549	215.849	171.613	169.999	0.142834	0.350414	0.670073	176.337	196.003
4930452B06Rik	17.4977	31.0111	76.267	71.3785	92.9349	72.6056	93.7177	1.17431	0.007968	0.0702722	41.5919	82.6592
4930453N24Rik	308.397	334.92	372.861	356.893	371.74	277.221	383.589	0.0259094	0.851498	0.949856	338.726	347.361
4930455C13Rik	13.1233	4.13481	10.1689	15.5171	2.9979	4.40034	10.8974	-0.129855	0.848223	NA	9.14233	8.45318
4930455G09Rik	6.56163	4.13481	5.08447	3.10341	5.9958	6.60051	10.8974	0.424269	0.581359	NA	5.2603	6.64928
4930455H04Rik	4.37442	4.13481	3.38965	0	2.9979	4.40034	0	-1.08214	0.377197	NA	3.96629	1.84956
4930471G03Rik	2.18721	2.06741	1.69482	9.31024	8.9937	4.40034	0	1.47057	0.237381	NA	1.98315	5.67607
4930473A02Rik	10.936	12.4044	11.8638	15.5171	14.9895	8.80067	10.8974	0.0513954	0.925869	0.974055	11.7347	12.5512
4930474M22Rik	0	6.20222	1.69482	9.31024	0	0	4.35896	0.306232	0.798405	NA	2.63235	3.4173
4930478L05Rik	17.4977	12.4044	22.0327	3.10341	8.9937	17.6013	6.53844	-0.896586	0.114144	0.379646	17.3116	9.05923
4930479D17Rik	2.18721	2.06741	1.69482	0	0	0	0	-2.04533	0.202845	NA	1.98315	0
4930480G23Rik	4.37442	0	6.77929	6.20683	2.9979	13.201	0	0.570076	0.5366	NA	3.7179	5.60144
4930480K23Rik	72.1779	51.6851	47.455	43.4478	47.9664	52.804	56.6665	-0.153022	0.565768	0.815392	57.106	50.2212
4930481A15Rik	78.7395	59.9548	62.7084	74.4819	47.9664	101.208	93.7177	0.267046	0.375594	0.690872	67.1342	79.3434
4930483K19Rik	2.18721	4.13481	10.1689	3.10341	2.9979	0	0	-2.04312	0.129486	NA	5.49699	1.52533
4930483O08Rik	4.37442	2.06741	1.69482	3.10341	0	0	2.17948	-0.996675	0.497488	NA	2.71222	1.32072
4930486L24Rik	4.37442	14.4718	3.38965	18.6205	11.9916	15.4012	8.71792	0.893216	0.169112	0.468243	7.41197	13.6828
4930487D11Rik	2.18721	2.06741	0	0	0	0	2.17948	-0.69057	0.680422	NA	1.4182	0.54487
4930487H11Rik	21.8721	4.13481	5.08447	9.31024	11.9916	6.60051	8.71792	0.0306859	0.96367	NA	10.3638	9.15507
4930502E09Rik	13.1233	2.06741	1.69482	9.31024	5.9958	8.80067	4.35896	0.719397	0.399735	NA	5.62849	7.11642
4930503B20Rik	6.56163	2.06741	3.38965	3.10341	5.9958	0	2.17948	-0.651836	0.605785	NA	4.00623	2.81967
4930503L19Rik	91.8628	82.6962	86.436	62.0683	68.9517	81.4062	91.5382	-0.182077	0.416267	0.719332	86.9983	75.9911
4930505A04Rik	0	0	3.38965	3.10341	0	2.20017	0	0.159863	0.929557	NA	1.12988	1.3259
4930506A18Rik	0	2.06741	0	6.20683	0	2.20017	2.17948	1.87909	0.281799	NA	0.689135	2.64662
4930506C21Rik	28.4337	12.4044	8.47411	3.10341	11.9916	13.201	13.0769	-0.514623	0.346978	0.667961	16.4374	10.3432
4930507D05Rik	10.936	8.26962	1.69482	9.31024	8.9937	13.201	6.53844	0.57411	0.420588	NA	6.96683	9.51085
4930509E16Rik	2.18721	4.13481	5.08447	3.10341	2.9979	2.20017	0	-0.980975	0.418242	NA	3.80216	2.07537
4930511A08Rik	17.4977	8.26962	16.9482	15.5171	14.9895	19.8015	17.4358	0.260286	0.642213	0.859183	14.2385	16.936
4930511E03Rik	0	0	0	0	0	0	0	0	1	NA	0	0
4930511M06Rik	6.56163	2.06741	1.69482	0	2.9979	6.60051	4.35896	0.291187	0.782829	NA	3.44129	3.48934
4930512B01Rik	65.6163	24.8089	32.2016	34.1376	32.9769	33.0025	47.9486	-0.069335	0.850613	0.949566	40.8756	37.0164
4930512J16Rik	6.56163	4.13481	0	0	2.9979	2.20017	2.17948	-0.591216	0.638919	NA	3.56548	1.84439
4930513N10Rik	13.1233	12.4044	3.38965	15.5171	8.9937	24.2019	13.0769	0.767089	0.190699	0.497106	9.63911	15.4474
4930515G01Rik	13.1233	10.337	23.7275	12.4137	14.9895	17.6013	19.6153	0.0405418	0.934198	0.977668	15.7293	16.155
4930520O04Rik	19.6849	20.6741	37.2861	46.5512	47.9664	57.2044	50.128	1.02855	0.0024442	0.0304926	25.8817	50.4625
4930521E06Rik	21.8721	12.4044	8.47411	3.10341	2.9979	8.80067	13.0769	-0.850959	0.203269	0.51428	14.2502	6.99472
4930523C07Rik	139.981	146.786	142.365	167.584	152.893	151.812	143.846	0.0939333	0.61099	0.842172	143.044	154.034
4930525D18Rik	2.18721	0	3.38965	3.10341	2.9979	2.20017	0	0.0487012	0.972688	NA	1.85895	2.07537
4930525G20Rik	45.9314	31.0111	30.5068	15.5171	23.9832	39.603	30.5127	-0.329687	0.374363	0.689408	35.8164	27.404
4930526I15Rik	8.74884	26.8763	23.7275	34.1376	17.9874	26.402	17.4358	0.299683	0.545602	0.80385	19.7842	23.9907
4930527F14Rik	0	2.06741	1.69482	0	2.9979	0	0	-0.594934	0.726874	NA	1.25408	0.749475
4930528A17Rik	6.56163	6.20222	0	0	0	0	4.35896	-1.59142	0.269683	NA	4.25461	1.08974
4930532I03Rik	6.56163	0	1.69482	3.10341	0	0	2.17948	-0.867305	0.583186	NA	2.75215	1.32072
4930533B01Rik	30.6209	12.4044	8.47411	12.4137	11.9916	11.0008	17.4358	-0.21389	0.695782	0.883283	17.1665	13.2105
4930538K18Rik	0	0	0	3.10341	0	2.20017	0	1.82986	0.299776	NA	0	1.3259
4930539E08Rik	21.8721	8.26962	15.2534	37.241	41.9706	77.0059	47.9486	1.75845	0.000436995	0.00829565	15.1317	51.0415
4930539J05Rik	13.1233	20.6741	6.77929	21.7239	14.9895	22.0017	6.53844	0.267388	0.629928	0.852464	13.5255	16.3134
4930545L23Rik	19.6849	6.20222	10.1689	6.20683	2.9979	19.8015	8.71792	-0.185295	0.764662	0.914107	12.0187	9.43104
4930546C10Rik	0	2.06741	6.77929	0	5.9958	8.80067	4.35896	0.965202	0.484529	NA	2.9489	4.78886
4930546K05Rik	0	0	1.69482	0	0	0	2.17948	0.134895	0.942941	NA	0.564941	0.54487
4930547E08Rik	0	0	0	0	2.9979	0	0	1.11461	0.554739	NA	0	0.749475
4930548H24Rik	2.18721	0	0	6.20683	0	6.60051	2.17948	2.43042	0.12723	NA	0.72907	3.7467
4930549C15Rik	30.6209	12.4044	22.0327	18.6205	11.9916	28.6022	21.7948	-0.0483532	0.913092	0.971634	21.686	20.2523
4930549G23Rik	10.936	18.6066	8.47411	6.20683	14.9895	6.60051	8.71792	-0.486494	0.427999	0.729228	12.6723	9.12869
4930550C14Rik	4.37442	6.20222	3.38965	3.10341	0	8.80067	2.17948	-0.329279	0.742309	NA	4.65543	3.52089
4930552P12Rik	2.18721	0	6.77929	12.4137	2.9979	4.40034	4.35896	0.914137	0.415452	NA	2.98883	6.04271
4930554I06Rik	4.37442	10.337	1.69482	0	0	11.0008	4.35896	-0.151087	0.89114	NA	5.46876	3.83995
4930556M19Rik	41.557	24.8089	22.0327	27.9307	32.9769	37.4029	45.7691	0.370132	0.269689	0.594788	29.4662	36.0199
4930556N13Rik	50.3058	18.6066	18.6431	9.31024	11.9916	15.4012	15.2564	-1.0349	0.028315	0.164797	29.1852	12.9898
4930557K07Rik	13.1233	18.6066	13.5586	12.4137	14.9895	15.4012	23.9743	0.178463	0.721499	0.898383	15.0962	16.6947
4930558J18Rik	0	2.06741	0	3.10341	8.9937	0	4.35896	2.47829	0.0994744	NA	0.689135	4.11402
4930562C15Rik	48.1186	14.4718	20.3379	18.6205	26.9811	30.8024	13.0769	-0.21755	0.651404	0.862255	27.6428	22.3702
4930562F07Rik	8.74884	6.20222	3.38965	0	2.9979	2.20017	2.17948	-1.64446	0.145012	NA	6.11357	1.84439
4930563D23Rik	2.18721	2.06741	1.69482	3.10341	2.9979	2.20017	2.17948	0.386503	0.772096	NA	1.98315	2.62024
4930563E18Rik	0	0	0	0	0	0	0	0	1	NA	0	0
4930563E22Rik	10.936	6.20222	6.77929	0	20.9853	15.4012	6.53844	0.443137	0.500854	0.777832	7.97252	10.7312
4930563F08Rik	61.2419	12.4044	23.7275	18.6205	11.9916	24.2019	8.71792	-0.838472	0.0881643	0.328107	32.4579	15.883
4930563M21Rik	10.936	0	1.69482	6.20683	2.9979	8.80067	2.17948	0.747946	0.464795	NA	4.21029	5.04622
4930564C03Rik	4.37442	4.13481	1.69482	3.10341	0	0	4.35896	-0.816575	0.520606	NA	3.40135	1.86559
4930565N06Rik	126.858	55.8199	103.384	111.723	62.9559	74.8057	56.6665	-0.316282	0.267357	0.593288	95.3541	76.5378
4930570G19Rik	0	4.13481	3.38965	0	0	4.40034	6.53844	0.188529	0.870173	NA	2.50815	2.73469
4930572O03Rik	2.18721	0	0	0	0	0	0	-0.559776	0.773574	NA	0.72907	0
4930577N17Rik	21.8721	10.337	16.9482	6.20683	20.9853	26.402	19.6153	0.210448	0.668422	0.870614	16.3858	18.3024
4930578C19Rik	34.9953	41.3481	30.5068	34.1376	26.9811	52.804	26.1538	-0.00771041	0.981706	0.994669	35.6168	35.0191
4930578M01Rik	10.936	2.06741	8.47411	0	8.9937	11.0008	2.17948	-0.36183	0.674833	NA	7.15919	5.54351
4930579G18Rik	89.6756	57.8873	55.9292	83.7922	83.9412	96.8074	78.4613	0.357335	0.154836	0.446977	67.8307	85.7505
4930579G24Rik	13.1233	16.5392	27.1172	34.1376	8.9937	44.0034	30.5127	0.640735	0.109765	0.37026	18.9266	29.4118
4930579H20Rik	13.1233	4.13481	8.47411	3.10341	5.9958	8.80067	0	-0.919439	0.278021	NA	8.57739	4.47497
4930579K19Rik	2.18721	0	5.08447	3.10341	8.9937	6.60051	8.71792	1.43726	0.135051	NA	2.42389	6.85389
4930579P08Rik	4.37442	6.20222	5.08447	0	0	4.40034	0	-2.03819	0.108736	NA	5.22037	1.10008
4930581F22Rik	59.0547	57.8873	42.3706	49.6546	26.9811	50.6039	43.5896	-0.284238	0.331602	0.654937	53.1042	42.7073
4930583K01Rik	0	0	0	0	2.9979	0	0	1.1077	0.584229	NA	0	0.749475
4930590J08Rik	6.56163	2.06741	6.77929	9.31024	2.9979	4.40034	4.35896	0.0261309	0.978839	NA	5.13611	5.26686
4930592I03Rik	50.3058	26.8763	40.6757	24.8273	26.9811	57.2044	30.5127	-0.13504	0.724218	0.899477	39.2859	34.8814
4930593A02Rik	4.37442	2.06741	0	3.10341	5.9958	0	2.17948	0.286181	0.838928	NA	2.14727	2.81967
4930594C11Rik	72.1779	33.0785	25.4223	46.5512	47.9664	44.0034	34.8717	0.0821337	0.809786	0.931889	43.5596	43.3482
4930595D18Rik	15.3105	4.13481	8.47411	34.1376	8.9937	8.80067	6.53844	0.659827	0.35386	NA	9.30646	14.6176
4930596I21Rik	17.4977	16.5392	10.1689	12.4137	8.9937	15.4012	4.35896	-0.484741	0.434757	0.732274	14.7353	10.2919
4930599N23Rik	4.37442	2.06741	1.69482	9.31024	8.9937	11.0008	8.71792	2.01158	0.0300731	NA	2.71222	9.50568
4931402G19Rik	8.74884	4.13481	6.77929	0	5.9958	2.20017	0	-1.7407	0.106414	NA	6.55431	2.04899
4931403E22Rik	10.936	6.20222	5.08447	15.5171	5.9958	8.80067	6.53844	0.334497	0.63337	NA	7.40758	9.213
4931403G20Rik	56.8674	33.0785	38.9809	21.7239	14.9895	52.804	50.128	-0.23923	0.51328	0.786423	42.9756	34.9114
4931406C07Rik	645.227	727.727	920.289	896.887	728.49	695.253	669.1	-0.0368039	0.837971	0.943254	764.414	747.433
4931406H21Rik	249.342	80.6288	110.163	108.62	71.9496	151.812	102.436	-0.307928	0.258739	0.584224	146.711	108.704
4931406P16Rik	907.692	872.445	745.722	962.058	881.383	921.871	893.587	0.123911	0.210108	0.523336	841.953	914.725
4931408D14Rik	21.8721	31.0111	20.3379	31.0341	23.9832	39.603	26.1538	0.311643	0.411821	0.716302	24.407	30.1935
4931414P19Rik	63.4291	66.157	77.9619	58.9649	62.9559	79.2061	69.7434	-0.0189908	0.93618	0.978266	69.1826	67.7176
4931423N10Rik	0	0	1.69482	0	0	0	0	-0.619464	0.768464	NA	0.564941	0
4931428F04Rik	65.6163	43.4155	62.7084	86.8956	83.9412	83.6064	91.5382	0.594955	0.0240478	0.147808	57.2467	86.4953
4931429I11Rik	2.18721	2.06741	1.69482	0	0	0	0	-2.04805	0.222954	NA	1.98315	0
4931429P17Rik	0	0	0	0	0	2.20017	0	1.10161	0.678635	NA	0	0.550042
4931430N09Rik	21.8721	4.13481	15.2534	6.20683	5.9958	8.80067	8.71792	-0.782428	0.26838	0.593475	13.7534	7.43031
4931431C16Rik	6.56163	2.06741	1.69482	9.31024	2.9979	8.80067	8.71792	1.22221	0.15979	NA	3.44129	7.45668
4931440F15Rik	2.18721	0	3.38965	0	0	2.20017	0	-1.25155	0.438479	NA	1.85895	0.550042
4931440P22Rik	0	0	0	3.10341	0	0	8.71792	3.0955	0.0756807	NA	0	2.95533
4932413F04Rik	10.936	0	1.69482	0	0	0	2.17948	-1.92168	0.248493	NA	4.21029	0.54487
4932416H05Rik	41.557	51.6851	32.2016	43.4478	35.9748	57.2044	47.9486	0.176961	0.546295	0.804252	41.8146	46.1439
4932418E24Rik	172.79	76.494	94.9101	102.413	92.9349	129.81	84.9997	-0.12259	0.633492	0.854474	114.731	102.539
4932435O22Rik	0	6.20222	1.69482	3.10341	2.9979	4.40034	0	0.0540041	0.965703	NA	2.63235	2.62541
4932438A13Rik	2998.66	2677.29	2557.49	2727.9	2518.24	2644.6	2597.94	-0.0630848	0.543464	0.802683	2744.48	2622.17
4932438H23Rik	6.56163	6.20222	5.08447	15.5171	2.9979	0	4.35896	-0.153745	0.862678	NA	5.94944	5.71848
4932441J04Rik	2.18721	6.20222	1.69482	0	5.9958	6.60051	0	-0.0750961	0.952051	NA	3.36142	3.14908
4933400A11Rik	13.1233	0	3.38965	9.31024	2.9979	4.40034	8.71792	0.594633	0.514706	NA	5.5043	6.3566
4933400F21Rik	150.917	53.7525	91.5204	71.3785	59.958	70.4054	69.7434	-0.479413	0.0599208	0.263866	98.7301	67.8713
4933401H06Rik	24.0593	10.337	10.1689	6.20683	8.9937	8.80067	8.71792	-0.76741	0.222526	0.539376	14.8551	8.17978
4933402D24Rik	10.936	2.06741	3.38965	6.20683	2.9979	4.40034	10.8974	0.33221	0.69378	NA	5.46437	6.12562
4933404O12Rik	37.1826	37.2133	28.812	46.5512	17.9874	39.603	43.5896	0.117439	0.723272	0.899254	34.4026	36.9328
4933405D12Rik	0	0	0	3.10341	2.9979	0	2.17948	2.43191	0.161739	NA	0	2.0702
4933405L10Rik	2.18721	2.06741	1.69482	3.10341	0	2.20017	0	-0.602017	0.708864	NA	1.98315	1.3259
4933406C10Rik	17.4977	4.13481	8.47411	3.10341	8.9937	4.40034	10.8974	-0.463598	0.492519	0.773392	10.0355	6.84871
4933406I18Rik	15.3105	2.06741	5.08447	15.5171	2.9979	8.80067	8.71792	0.370585	0.602062	NA	7.48745	9.00839
4933406J10Rik	17.4977	12.4044	5.08447	12.4137	5.9958	0	6.53844	-0.928783	0.201687	NA	11.6622	6.23697
4933406M09Rik	2.18721	2.06741	1.69482	3.10341	0	0	0	-1.32804	0.411267	NA	1.98315	0.775854
4933407K13Rik	34.9953	41.3481	27.1172	34.1376	20.9853	68.2052	65.3844	0.485927	0.189839	0.496224	34.4869	47.1781
4933408B17Rik	15.3105	14.4718	8.47411	0	8.9937	24.2019	23.9743	0.242571	0.672906	0.872925	12.7521	14.2925
4933408N05Rik	0	2.06741	6.77929	3.10341	0	2.20017	0	-1.04148	0.49721	NA	2.9489	1.3259
4933411K16Rik	32.8081	10.337	13.5586	24.8273	26.9811	28.6022	19.6153	0.426011	0.414597	0.717663	18.9012	25.0065
4933412E12Rik	21.8721	14.4718	25.4223	12.4137	11.9916	26.402	32.6922	0.071148	0.863576	0.954067	20.5888	20.8749
4933413J09Rik	32.8081	31.0111	18.6431	37.241	38.9727	26.402	23.9743	0.20546	0.625239	0.849687	27.4874	31.6475
4933416M06Rik	0	0	1.69482	0	2.9979	2.20017	2.17948	1.42407	0.377309	NA	0.564941	1.84439
4933416M07Rik	15.3105	10.337	6.77929	9.31024	11.9916	19.8015	6.53844	0.189343	0.755742	0.910779	10.8089	11.9105
4933417A18Rik	2.18721	0	1.69482	0	0	0	0	-1.38355	0.444011	NA	1.29401	0
4933417D19Rik	13.1233	16.5392	6.77929	9.31024	2.9979	4.40034	8.71792	-0.898967	0.210596	NA	12.1473	6.3566
4933417G07Rik	41.557	10.337	16.9482	9.31024	5.9958	6.60051	2.17948	-1.85485	0.00677934	0.062665	22.9474	6.02151
4933417O13Rik	6.56163	2.06741	0	3.10341	5.9958	2.20017	0	0.509333	0.744839	NA	2.87634	2.82485
4933421O10Rik	201.223	117.842	150.839	192.412	215.849	156.212	152.564	0.180206	0.408883	0.714807	156.635	179.259
4933422A05Rik	4.37442	2.06741	1.69482	3.10341	0	0	6.53844	-0.0657792	0.963418	NA	2.71222	2.41046
4933424G05Rik	61.2419	31.0111	28.812	43.4478	38.9727	37.4029	23.9743	-0.110077	0.738502	0.905702	40.355	35.9494
4933427D14Rik	312.771	204.673	196.599	204.825	254.822	327.825	283.332	0.201916	0.198895	0.507896	238.015	267.701
4933427E11Rik	2.18721	2.06741	0	0	2.9979	0	4.35896	0.496621	0.775236	NA	1.4182	1.83922
4933427G17Rik	4.37442	6.20222	1.69482	6.20683	11.9916	6.60051	4.35896	0.833571	0.328032	NA	4.09049	7.28947
4933427I22Rik	6.56163	0	6.77929	6.20683	8.9937	17.6013	10.8974	1.32231	0.0884644	NA	4.44697	10.9248
4933428G20Rik	8.74884	4.13481	8.47411	0	5.9958	8.80067	6.53844	-0.343423	0.664298	NA	7.11925	5.33373
4933430I17Rik	6.56163	8.26962	5.08447	3.10341	0	2.20017	6.53844	-1.05965	0.252157	NA	6.63857	2.96051
4933430M04Rik	0	0	0	0	0	2.20017	2.17948	1.82372	0.34075	NA	0	1.09491
4933431E20Rik	122.484	152.988	128.807	89.999	104.927	94.6073	117.692	-0.394831	0.0373777	0.19519	134.759	101.806
4933431G14Rik	4.37442	0	13.5586	3.10341	8.9937	6.60051	8.71792	0.153203	0.854552	NA	5.97767	6.85389
4933433G15Rik	8.74884	4.13481	5.08447	3.10341	11.9916	13.201	4.35896	0.470542	0.520388	NA	5.98937	8.16375
4933433G19Rik	17.4977	10.337	10.1689	15.5171	14.9895	17.6013	13.0769	0.295663	0.583794	0.825922	12.6679	15.2962
4933433H22Rik	2.18721	2.06741	0	3.10341	0	6.60051	6.53844	1.62927	0.255179	NA	1.4182	4.06059
4933434E20Rik	717.405	680.176	703.351	629.993	590.586	530.241	623.331	-0.241591	0.0157541	0.112478	700.311	593.538
4933439C10Rik	69.9907	51.6851	61.0136	83.7922	80.9433	99.0076	89.3587	0.544166	0.0210106	0.13544	60.8965	88.2754
4933439K11Rik	21.8721	14.4718	11.8638	24.8273	32.9769	19.8015	13.0769	0.478064	0.304436	0.631861	16.0692	22.6707
4933440J02Rik	2.18721	2.06741	1.69482	0	2.9979	4.40034	6.53844	0.977583	0.434677	NA	1.98315	3.48417
4933440M02Rik	6.56163	0	0	0	2.9979	0	0	-0.972129	0.537474	NA	2.18721	0.749475
5031414D18Rik	19.6849	18.6066	15.2534	12.4137	14.9895	24.2019	26.1538	0.176614	0.691786	0.88114	17.8483	19.4397
5031425E22Rik	336.83	181.932	237.275	282.411	254.822	270.621	239.743	0.0753626	0.624063	0.848634	252.012	261.899
5031425F14Rik	8.74884	4.13481	3.38965	6.20683	2.9979	6.60051	8.71792	0.239913	0.7693	NA	5.42443	6.13079
5031426D15Rik	115.922	68.2244	77.9619	43.4478	50.9643	68.2052	52.3075	-0.66549	0.0151863	0.109741	87.3694	53.7312
5031434C07Rik	13.1233	8.26962	11.8638	18.6205	11.9916	13.201	8.71792	0.214549	0.713286	0.893062	11.0855	13.1328
5031434O11Rik	13.1233	14.4718	3.38965	18.6205	5.9958	13.201	15.2564	0.41537	0.491208	0.772253	10.3282	13.2684
5031439G07Rik	973.308	1281.79	1327.05	1753.43	1675.83	1412.51	1333.84	0.369881	6.77697e-05	0.00204198	1194.05	1543.9
5033403F01Rik	2.18721	8.26962	8.47411	6.20683	0	6.60051	6.53844	-0.309686	0.707028	NA	6.31031	4.83644
5033406O09Rik	32.8081	26.8763	15.2534	12.4137	8.9937	22.0017	28.3332	-0.344206	0.416571	0.71953	24.9793	17.9356
5330417C22Rik	63.4291	66.157	98.2997	133.447	86.9391	96.8074	132.948	0.574312	0.0177278	0.12175	75.9619	112.535
5330426P16Rik	65.6163	35.1459	72.8774	55.8615	47.9664	59.4046	63.2049	-0.0397677	0.880988	0.959125	57.8799	56.6093
5330439B14Rik	2.18721	0	1.69482	0	0	0	6.53844	0.466095	0.805025	NA	1.29401	1.63461
5430402O13Rik	10.936	14.4718	1.69482	3.10341	2.9979	2.20017	10.8974	-0.838974	0.314557	NA	9.03424	4.79972
5430403N17Rik	4.37442	2.06741	1.69482	3.10341	2.9979	4.40034	2.17948	0.307053	0.797017	NA	2.71222	3.17028
5430405H02Rik	17.4977	14.4718	16.9482	24.8273	17.9874	24.2019	21.7948	0.448673	0.316021	0.641493	16.3059	22.2028
5430416N02Rik	87.4884	57.8873	62.7084	46.5512	53.9622	57.2044	52.3075	-0.380348	0.152402	0.443262	69.3614	52.5063
5430416O09Rik	166.228	115.775	86.436	127.24	119.916	160.612	130.769	0.171386	0.414076	0.717291	122.813	134.634
5430419D17Rik	0	2.06741	0	0	0	6.60051	0	1.3285	0.466791	NA	0.689135	1.65013
5430421F17Rik	0	0	0	0	0	0	0	0	1	NA	0	0
5430425K12Rik	0	6.20222	1.69482	3.10341	0	0	6.53844	-0.0508267	0.967561	NA	2.63235	2.41046
5430427M07Rik	2.18721	2.06741	1.69482	6.20683	2.9979	2.20017	2.17948	0.731864	0.557222	NA	1.98315	3.39609
5430427O19Rik	19.6849	10.337	18.6431	9.31024	14.9895	15.4012	15.2564	-0.227172	0.647463	0.860756	16.2217	13.7393
5430428K19Rik	15.3105	6.20222	3.38965	9.31024	0	11.0008	2.17948	-0.33518	0.690016	NA	8.30078	5.62264
5430431A17Rik	32.8081	14.4718	25.4223	12.4137	17.9874	6.60051	17.4358	-0.812104	0.167127	0.465799	24.2341	13.6094
5430437J10Rik	6.56163	8.26962	1.69482	3.10341	11.9916	2.20017	10.8974	0.400847	0.613383	NA	5.50869	7.04815
5530601H04Rik	139.981	82.6962	125.417	136.55	116.918	132.01	139.487	0.185138	0.385537	0.695854	116.031	131.241
5730405O15Rik	10.936	16.5392	6.77929	12.4137	5.9958	17.6013	15.2564	0.23273	0.67742	0.874511	11.4182	12.8168
5730408K05Rik	43.7442	47.5503	59.3188	24.8273	35.9748	41.8032	37.0512	-0.506257	0.104669	0.360259	50.2044	34.9141
5730409E04Rik	319.333	367.998	296.594	263.79	290.796	237.618	244.102	-0.345869	0.00795621	0.0702668	327.975	259.077
5730420D15Rik	6.56163	2.06741	0	6.20683	2.9979	6.60051	4.35896	0.925795	0.369526	NA	2.87634	5.04105
5730422E09Rik	8.74884	4.13481	6.77929	9.31024	0	11.0008	8.71792	0.206986	0.784614	NA	6.55431	7.25725
5730455P16Rik	214.347	235.684	266.087	235.859	212.851	257.42	300.768	0.0848139	0.57107	0.81888	238.706	251.725
5730480H06Rik	59.0547	28.9437	25.4223	18.6205	26.9811	41.8032	26.1538	-0.312282	0.455939	0.747786	37.8069	28.3896
5730507C01Rik	6.56163	4.13481	10.1689	3.10341	0	15.4012	4.35896	-0.251694	0.738774	0.905727	6.95513	5.71589
5730508B09Rik	107.173	88.8984	79.6567	77.5854	71.9496	72.6056	67.5639	-0.336213	0.142761	0.429219	91.9095	72.4261
5730522E02Rik	2.18721	2.06741	0	3.10341	0	0	4.35896	0.486894	0.755168	NA	1.4182	1.86559
5730559C18Rik	50.3058	39.2807	28.812	49.6546	26.9811	24.2019	21.7948	-0.371203	0.336613	0.65911	39.4662	30.6581
5830411N06Rik	0	0	1.69482	6.20683	0	0	2.17948	1.48845	0.38461	NA	0.564941	2.09658
5830415F09Rik	107.173	134.381	108.469	62.0683	65.9538	88.0067	61.0255	-0.731666	0.000974653	0.015473	116.674	69.2636
5830416P10Rik	15.3105	4.13481	10.1689	9.31024	8.9937	11.0008	6.53844	-0.13704	0.829917	0.940494	9.8714	8.96081
5830417I10Rik	216.534	208.808	172.872	170.688	188.868	237.618	222.307	0.0619509	0.702835	0.886887	199.405	204.87
5830428M24Rik	19.6849	12.4044	6.77929	21.7239	23.9832	13.201	17.4358	0.569214	0.263679	0.589496	12.9562	19.086
5830432E09Rik	39.3698	10.337	16.9482	15.5171	11.9916	15.4012	28.3332	-0.155827	0.735619	0.904486	22.2183	17.8108
5830444B04Rik	19.6849	16.5392	10.1689	15.5171	5.9958	11.0008	10.8974	-0.502756	0.432651	0.73109	15.4644	10.8528
5830454E08Rik	6.56163	2.06741	15.2534	6.20683	17.9874	6.60051	2.17948	-0.0137475	0.985416	NA	7.96081	8.24355
5930403L14Rik	24.0593	20.6741	8.47411	18.6205	17.9874	6.60051	17.4358	-0.238239	0.672768	0.872925	17.7358	15.1611
5930412G12Rik	4.37442	8.26962	13.5586	6.20683	2.9979	13.201	10.8974	-0.0338842	0.958879	0.987653	8.73421	8.32579
5930430L01Rik	69.9907	51.6851	64.4033	65.1717	50.9643	66.0051	89.3587	0.143631	0.587379	0.827969	62.0264	67.8749
6030407O03Rik	2.18721	0	0	3.10341	0	4.40034	0	1.42633	0.412038	NA	0.72907	1.87594
6030408B16Rik	4.37442	2.06741	0	0	2.9979	0	0	-1.23011	0.464112	NA	2.14727	0.749475
6030419C18Rik	26.2465	33.0785	23.7275	24.8273	32.9769	15.4012	28.3332	-0.142855	0.747052	0.908345	27.6842	25.3847
6030440G07Rik	4.37442	2.06741	1.69482	3.10341	2.9979	2.20017	0	-0.487226	0.715961	NA	2.71222	2.07537
6030443J06Rik	63.4291	33.0785	22.0327	46.5512	38.9727	37.4029	43.5896	0.123563	0.735737	0.904509	39.5134	41.6291
6030458C11Rik	374.013	461.031	377.945	400.34	347.756	380.629	355.255	-0.118128	0.286527	0.615539	404.33	370.995
6030466F02Rik	4.37442	2.06741	3.38965	3.10341	5.9958	0	4.35896	-0.0819597	0.948149	NA	3.27716	3.36454
6030468B19Rik	4.37442	2.06741	0	3.10341	0	2.20017	2.17948	0.172752	0.90664	NA	2.14727	1.87077
6230400D17Rik	19.6849	2.06741	6.77929	12.4137	20.9853	11.0008	13.0769	0.676743	0.275995	0.601443	9.51053	14.3692
6330403A02Rik	8.74884	8.26962	6.77929	27.9307	14.9895	17.6013	15.2564	1.25293	0.0285118	0.165684	7.93258	18.9445
6330403K07Rik	2.18721	41.3481	10.1689	9.31024	8.9937	8.80067	15.2564	-0.687014	0.30079	0.628347	17.9014	10.5902
6330407A03Rik	54.6802	24.8089	40.6757	34.1376	23.9832	24.2019	19.6153	-0.653763	0.101994	0.355126	40.0549	25.4845
6330408A02Rik	45.9314	35.1459	54.2343	37.241	68.9517	46.2035	39.2306	0.0626893	0.840549	0.944741	45.1039	47.9067
6330409D20Rik	24.0593	10.337	13.5586	18.6205	17.9874	13.201	2.17948	-0.288902	0.652296	0.86274	15.985	12.9971
6330410L21Rik	0	2.06741	3.38965	0	0	0	2.17948	-1.7238	0.395644	NA	1.81902	0.54487
6330415G19Rik	13.1233	8.26962	10.1689	6.20683	14.9895	8.80067	13.0769	0.0506004	0.932521	0.976922	10.5206	10.7685
6330416G13Rik	153.105	148.853	130.501	167.584	182.872	134.21	122.051	0.05864	0.764046	0.91404	144.153	151.679
6330418K02Rik	0	0	0	9.31024	5.9958	2.20017	0	3.4673	0.0154358	NA	0	4.37655
6330549D23Rik	30.6209	22.7415	35.5913	43.4478	44.9685	44.0034	39.2306	0.516142	0.123053	0.394357	29.6512	42.9126
6430531B16Rik	0	2.06741	1.69482	0	17.9874	11.0008	4.35896	2.65435	0.0322861	NA	1.25408	8.3368
6430548M08Rik	428.693	516.851	347.439	481.029	380.733	228.818	187.435	-0.485928	0.0249783	0.151892	430.994	319.504
6430550D23Rik	21.8721	16.5392	11.8638	21.7239	14.9895	30.8024	19.6153	0.42547	0.350224	0.670073	16.7584	21.7828
6430562O15Rik	10.936	8.26962	3.38965	27.9307	11.9916	17.6013	10.8974	1.20455	0.0448561	0.218693	7.53177	17.1053
6430571L13Rik	15.3105	10.337	33.8965	18.6205	5.9958	8.80067	26.1538	-0.357521	0.507073	0.781964	19.848	14.8927
6430573F11Rik	26.2465	51.6851	40.6757	37.241	41.9706	52.804	61.0255	0.320956	0.276461	0.601839	39.5358	48.2603
6430584L05Rik	2.18721	2.06741	1.69482	0	0	4.40034	2.17948	-0.0601162	0.965654	NA	1.98315	1.64495
6530402F18Rik	65.6163	66.157	49.1499	46.5512	50.9643	72.6056	63.2049	-0.0303984	0.912902	0.971584	60.3077	58.3315
6720489N17Rik	24.0593	6.20222	23.7275	18.6205	8.9937	13.201	13.0769	-0.434407	0.373676	0.68879	17.9963	13.473
6820408C15Rik	0	2.06741	0	0	0	0	0	-0.56978	0.73966	NA	0.689135	0
6820431F20Rik	89.6756	47.5503	44.0654	12.4137	44.9685	48.4037	63.2049	-0.43503	0.205825	0.518632	60.4304	42.2477
8030451O07Rik	4.37442	8.26962	0	0	0	4.40034	2.17948	-1.23736	0.341547	NA	4.21468	1.64495
8030462N17Rik	365.264	403.144	315.237	397.237	278.805	349.827	355.255	-0.0580176	0.642072	0.859183	361.215	345.281
8430408G22Rik	153.105	80.6288	149.144	133.447	191.866	169.413	150.384	0.320376	0.266093	0.592368	127.626	161.277
8430419L09Rik	546.802	657.435	560.986	543.098	533.626	545.642	566.665	-0.0987163	0.37094	0.686737	588.408	547.258
8430423G03Rik	2.18721	0	1.69482	0	0	0	0	-1.36631	0.4774	NA	1.29401	0
8430426J06Rik	96.2372	64.0896	54.2343	37.241	26.9811	41.8032	13.0769	-1.21923	0.00141402	0.0204054	71.5204	29.7755
8430429K09Rik	39.3698	39.2807	30.5068	31.0341	38.9727	28.6022	56.6665	0.117424	0.738176	0.905702	36.3858	38.8189
8430430B14Rik	2.18721	4.13481	0	3.10341	2.9979	2.20017	0	-0.0508521	0.970167	NA	2.10734	2.07537
8430431K14Rik	115.922	35.1459	64.4033	37.241	32.9769	33.0025	39.2306	-0.901609	0.0228375	0.143179	71.8238	35.6128
8430436N08Rik	4.37442	2.06741	0	0	0	0	4.35896	-0.352592	0.834207	NA	2.14727	1.08974
9030025P20Rik	13.1233	16.5392	11.8638	21.7239	20.9853	24.2019	17.4358	0.604851	0.193802	0.50179	13.8421	21.0867
9030404E10Rik	0	0	0	6.20683	0	0	0	1.88181	0.307775	NA	0	1.55171
9030612E09Rik	0	4.13481	3.38965	6.20683	0	0	2.17948	-0.23058	0.864833	NA	2.50815	2.09658
9030617O03Rik	115.922	76.494	84.7411	58.9649	92.9349	96.8074	87.1792	-0.11275	0.611162	0.842172	92.3857	83.9716
9030619P08Rik	0	0	0	3.10341	0	0	6.53844	2.77404	0.105045	NA	0	2.41046
9030624G23Rik	21.8721	18.6066	27.1172	6.20683	11.9916	19.8015	21.7948	-0.542817	0.264097	0.589704	22.532	14.9487
9030624J02Rik	693.345	744.266	671.15	747.923	755.471	704.054	697.434	0.0464927	0.629577	0.852319	702.92	726.22
9130008F23Rik	98.4244	66.157	84.7411	108.62	86.9391	101.208	58.846	0.0903447	0.734493	0.903601	83.1075	88.9031
9130011E15Rik	205.598	152.988	157.619	167.584	194.864	189.215	196.153	0.135323	0.381362	0.694057	172.068	186.954
9130019O22Rik	52.493	95.1006	69.4877	65.1717	74.9475	77.0059	71.9229	0.00637371	0.980072	0.994001	72.3605	72.262
9130019P16Rik	8.74884	6.20222	6.77929	15.5171	2.9979	11.0008	4.35896	0.225114	0.764371	NA	7.24345	8.46869
9130023H24Rik	129.045	192.269	113.553	139.654	107.924	99.0076	100.256	-0.381239	0.0503241	0.236181	144.956	111.71
9130221H12Rik	45.9314	41.3481	50.8447	49.6546	68.9517	50.6039	61.0255	0.313375	0.242141	0.563074	46.0414	57.5589
9130230L23Rik	37.1826	37.2133	44.0654	58.9649	47.9664	37.4029	69.7434	0.442106	0.25056	0.574733	39.4871	53.5194
9130401M01Rik	139.981	159.19	171.177	161.378	179.874	149.611	172.179	0.0726116	0.658139	0.86603	156.783	165.76
9130409J20Rik	0	0	0	0	5.9958	2.20017	0	2.44277	0.184851	NA	0	2.04899
9230102K24Rik	0	0	0	0	0	0	2.17948	1.11175	0.606032	NA	0	0.54487
9230102O04Rik	30.6209	26.8763	37.2861	40.3444	44.9685	41.8032	32.6922	0.317678	0.343287	0.665317	31.5944	39.9521
9230104L09Rik	0	0	0	3.10341	0	0	0	1.11407	0.608212	NA	0	0.775854
9230110C19Rik	30.6209	14.4718	30.5068	24.8273	11.9916	37.4029	37.0512	0.175467	0.641897	0.859183	25.1999	27.8182
9230112D13Rik	2.18721	4.13481	0	0	0	2.20017	0	-1.36652	0.392734	NA	2.10734	0.550042
9230112J17Rik	2.18721	0	0	0	5.9958	0	2.17948	1.44337	0.417638	NA	0.72907	2.04382
9230114K14Rik	26.2465	28.9437	28.812	27.9307	35.9748	39.603	32.6922	0.28985	0.409605	0.715531	28.0007	34.0502
9230116L04Rik	13.1233	6.20222	10.1689	12.4137	0	2.20017	8.71792	-0.772912	0.286882	NA	9.83147	5.83294
9230116N13Rik	2.18721	2.06741	5.08447	12.4137	0	4.40034	6.53844	0.823959	0.372558	NA	3.11303	5.83811
9230117E06Rik	0	0	3.38965	0	0	2.20017	0	-0.478326	0.812132	NA	1.12988	0.550042
9330020H09Rik	39.3698	47.5503	25.4223	46.5512	53.9622	33.0025	32.6922	0.141576	0.668161	0.87039	37.4475	41.552
9330102E08Rik	8.74884	18.6066	10.1689	15.5171	8.9937	22.0017	6.53844	0.0818055	0.880106	0.959125	12.5081	13.2627
9330111N05Rik	2.18721	2.06741	1.69482	0	5.9958	0	0	-0.564567	0.722378	NA	1.98315	1.49895
9330117O12Rik	0	0	3.38965	6.20683	5.9958	2.20017	2.17948	1.68323	0.253188	NA	1.12988	4.14557
9330133O14Rik	43.7442	55.8199	50.8447	37.241	65.9538	85.8066	65.3844	0.385026	0.151239	0.441496	50.1363	63.5964
9330136K24Rik	26.2465	22.7415	16.9482	18.6205	17.9874	8.80067	21.7948	-0.386241	0.3974	0.705882	21.9787	16.8008
9330151L19Rik	122.484	88.8984	71.1826	68.2751	92.9349	77.0059	84.9997	-0.198431	0.382692	0.694613	94.1882	80.8039
9330159F19Rik	10.936	18.6066	16.9482	12.4137	11.9916	4.40034	26.1538	-0.149702	0.814567	0.933775	15.497	13.7398
9330159M07Rik	4.37442	4.13481	11.8638	12.4137	8.9937	22.0017	23.9743	1.32568	0.0221297	0.14006	6.791	16.8458
9330162012Rik	24.0593	12.4044	27.1172	27.9307	17.9874	13.201	30.5127	0.0631689	0.879836	0.95907	21.1936	22.408
9330162B11Rik	6.56163	0	1.69482	3.10341	0	2.20017	8.71792	0.741255	0.568733	NA	2.75215	3.50538
9330175E14Rik	15.3105	6.20222	5.08447	24.8273	23.9832	26.402	17.4358	1.41486	0.0106491	0.0855767	8.86572	23.1621
9330175M20Rik	2.18721	2.06741	3.38965	3.10341	2.9979	8.80067	0	0.544152	0.666945	NA	2.54809	3.7255
9330179D12Rik	0	0	0	6.20683	0	6.60051	2.17948	3.36828	0.0301814	NA	0	3.7467
9330182L06Rik	2.18721	0	0	3.10341	0	4.40034	0	1.40366	0.39466	NA	0.72907	1.87594
9330188P03Rik	10.936	18.6066	6.77929	6.20683	11.9916	6.60051	13.0769	-0.328303	0.583377	0.825743	12.1073	9.46895
9430015G10Rik	174.977	152.988	179.651	142.757	164.885	191.415	150.384	-0.057882	0.748469	0.908655	169.205	162.36
9430016H08Rik	174.977	177.797	155.924	133.447	131.908	138.611	137.307	-0.314494	0.059412	0.262435	169.566	135.318
9430018G01Rik	26.2465	8.26962	15.2534	9.31024	8.9937	22.0017	13.0769	-0.205563	0.706206	0.889034	16.5898	13.3456
9430020K01Rik	494.309	547.862	508.447	592.752	494.654	448.834	588.46	0.0354555	0.798924	0.928144	516.873	531.175
9430037G07Rik	21.8721	4.13481	8.47411	21.7239	23.9832	13.201	13.0769	0.657517	0.229133	0.54777	11.4937	17.9962
9430038I01Rik	72.1779	84.7636	72.8774	46.5512	71.9496	57.2044	43.5896	-0.48155	0.0655647	0.277395	76.6063	54.8237
9430041J12Rik	2.18721	0	0	3.10341	0	2.20017	2.17948	1.62923	0.306468	NA	0.72907	1.87077
9430060I03Rik	15.3105	2.06741	5.08447	3.10341	8.9937	6.60051	8.71792	-0.000704039	0.999227	NA	7.48745	6.85389
9430065F17Rik	4.37442	4.13481	6.77929	6.20683	11.9916	8.80067	10.8974	0.881882	0.220428	NA	5.09617	9.47413
9430069I07Rik	0	4.13481	1.69482	0	2.9979	0	0	-1.23095	0.51385	NA	1.94321	0.749475
9430076C15Rik	34.9953	10.337	16.9482	18.6205	20.9853	28.6022	21.7948	0.171144	0.703035	0.886887	20.7602	22.5007
9430078K24Rik	0	6.20222	8.47411	3.10341	8.9937	11.0008	10.8974	0.963415	0.217284	NA	4.89211	8.49884
9430083A17Rik	54.6802	37.2133	40.6757	37.241	41.9706	35.2027	28.3332	-0.317483	0.323528	0.646887	44.1898	35.6869
9430091E24Rik	129.045	76.494	101.689	96.2058	92.9349	110.008	115.512	0.0380593	0.864355	0.954187	102.41	103.665
9530014B07Rik	4.37442	6.20222	20.3379	3.10341	17.9874	6.60051	10.8974	0.0428808	0.952225	0.986009	10.3048	9.64718
9530026P05Rik	19.6849	20.6741	8.47411	24.8273	32.9769	30.8024	17.4358	0.73547	0.115921	0.381682	16.2777	26.5106
9530027J09Rik	2.18721	0	3.38965	9.31024	8.9937	4.40034	8.71792	1.98232	0.0537758	NA	1.85895	7.85555
9530051G07Rik	0	0	1.69482	3.10341	2.9979	0	4.35896	1.86557	0.239578	NA	0.564941	2.61507
9530052E02Rik	2.18721	2.06741	1.69482	0	0	2.20017	2.17948	-0.656579	0.685375	NA	1.98315	1.09491
9530053A07Rik	2.18721	2.06741	5.08447	3.10341	0	2.20017	2.17948	-0.710662	0.606283	NA	3.11303	1.87077
9530059O14Rik	6.56163	0	3.38965	3.10341	0	4.40034	6.53844	0.287148	0.799296	NA	3.31709	3.51055
9530062K07Rik	10.936	22.7415	6.77929	6.20683	5.9958	8.80067	0	-1.34734	0.0677882	0.282887	13.4856	5.25083
9530068E07Rik	1122.04	1372.76	1415.18	1098.61	1157.19	1146.29	1373.07	-0.124406	0.232121	0.551646	1303.32	1193.79
9530077C05Rik	67.8035	26.8763	25.4223	27.9307	26.9811	26.402	26.1538	-0.456132	0.214594	0.529278	40.034	26.8669
9530080O11Rik	6.56163	6.20222	3.38965	6.20683	5.9958	2.20017	2.17948	-0.433591	0.633065	NA	5.3845	4.14557
9530082P21Rik	172.79	177.797	133.891	170.688	146.897	143.011	161.282	-0.0541534	0.760141	0.912399	161.492	155.469
9530091C08Rik	236.219	117.842	176.262	130.343	134.906	173.813	128.589	-0.27667	0.289485	0.618215	176.774	141.913
9630013A20Rik	15.3105	14.4718	6.77929	6.20683	0	6.60051	15.2564	-0.673184	0.322541	NA	12.1872	7.01592
9630013K17Rik	10.936	6.20222	5.08447	12.4137	11.9916	4.40034	10.8974	0.485601	0.502587	NA	7.40758	9.92575
9630028B13Rik	4.37442	2.06741	5.08447	3.10341	2.9979	2.20017	4.35896	-0.29517	0.778954	NA	3.8421	3.16511
9630028I04Rik	0	2.06741	1.69482	0	0	0	0	-1.43333	0.377051	NA	1.25408	0
9830147E19Rik	172.79	167.46	127.112	74.4819	104.927	198.015	139.487	-0.244205	0.330817	0.654224	155.787	129.228
9830166K06Rik	6.56163	2.06741	6.77929	0	2.9979	2.20017	2.17948	-1.44604	0.21114	NA	5.13611	1.84439
9930012K11Rik	21.8721	12.4044	11.8638	12.4137	11.9916	8.80067	15.2564	-0.326965	0.543171	0.802499	15.3801	12.1156
9930014A18Rik	69.9907	68.2244	71.1826	86.8956	80.9433	74.8057	43.5896	0.00132248	0.995668	0.999135	69.7992	71.5586
9930021J03Rik	568.674	595.413	618.61	598.959	668.532	620.448	649.485	0.0890397	0.408957	0.714836	594.232	634.356
9930104L06Rik	161.853	130.247	135.586	130.343	134.906	154.012	152.564	0.0190588	0.91628	0.972186	142.562	142.956
9930111J21Rik1	24.0593	35.1459	23.7275	3.10341	20.9853	30.8024	19.6153	-0.517333	0.222483	0.53937	27.6442	18.6266
9930111J21Rik2	2.18721	4.13481	3.38965	0	0	4.40034	2.17948	-0.83418	0.51642	NA	3.23722	1.64495
A130010J15Rik	157.479	132.314	123.722	130.343	149.895	81.4062	102.436	-0.273884	0.138563	0.422196	137.838	116.02
A130077B15Rik	6.56163	2.06741	1.69482	0	5.9958	0	8.71792	0.204039	0.856641	NA	3.44129	3.67843
A1bg	2.18721	0	1.69482	3.10341	0	2.20017	4.35896	0.960505	0.50235	NA	1.29401	2.41564
A230009B12Rik	2.18721	2.06741	0	0	0	0	0	-1.38512	0.465252	NA	1.4182	0
A230020J21Rik	2.18721	0	3.38965	3.10341	0	2.20017	0	-0.547951	0.722128	NA	1.85895	1.3259
A230028O05Rik	2.18721	4.13481	0	3.10341	5.9958	0	0	0.0360126	0.979342	NA	2.10734	2.2748
A230046K03Rik	1093.6	986.152	872.834	968.265	1016.29	998.877	976.407	0.014927	0.871317	0.956204	984.197	989.959
A230050P20Rik	104.986	80.6288	94.9101	121.033	137.903	92.4071	69.7434	0.153201	0.56095	0.811791	93.5083	105.272
A230056J06Rik	0	0	0	0	0	2.20017	0	1.11312	0.607569	NA	0	0.550042
A230056P14Rik	19.6849	12.4044	16.9482	18.6205	14.9895	24.2019	26.1538	0.387032	0.393934	0.703319	16.3458	20.9914
A230057D06Rik	4.37442	6.20222	0	0	0	6.60051	6.53844	0.0469007	0.964477	NA	3.52554	3.28474
A230065H16Rik	2.18721	4.13481	6.77929	0	0	8.80067	6.53844	-0.0744916	0.942256	NA	4.3671	3.83478
A230072C01Rik	54.6802	37.2133	27.1172	24.8273	35.9748	35.2027	30.5127	-0.282743	0.40294	0.71063	39.6702	31.6294
A230072E10Rik	48.1186	18.6066	25.4223	21.7239	32.9769	17.6013	19.6153	-0.388566	0.333494	0.656334	30.7159	22.9794
A230103J11Rik	24.0593	6.20222	15.2534	27.9307	14.9895	24.2019	8.71792	0.334926	0.510177	0.784532	15.1716	18.96
A230108P19Rik	6.56163	0	0	3.10341	2.9979	8.80067	6.53844	1.51129	0.182324	NA	2.18721	5.36011
A330009N23Rik	13.1233	8.26962	8.47411	3.10341	5.9958	6.60051	8.71792	-0.667124	0.349054	NA	9.95566	6.10441
A330015K06Rik	2.18721	8.26962	3.38965	0	5.9958	2.20017	4.35896	-0.473683	0.623647	NA	4.61549	3.13873
A330023F24Rik	94.05	72.3592	86.436	83.7922	80.9433	99.0076	71.9229	-0.010456	0.962793	0.988374	84.2817	83.9165
A330032B11Rik	4.37442	4.13481	5.08447	9.31024	0	8.80067	2.17948	0.146378	0.879199	NA	4.53123	5.0726
A330033J07Rik	2.18721	4.13481	5.08447	0	2.9979	4.40034	6.53844	-0.00505631	0.996472	NA	3.80216	3.48417
A330035P11Rik	50.3058	37.2133	32.2016	27.9307	23.9832	37.4029	32.6922	-0.340105	0.305353	0.632236	39.9069	30.5023
A330040F15Rik	2.18721	2.06741	3.38965	6.20683	5.9958	6.60051	2.17948	0.982941	0.328056	NA	2.54809	5.24565
A330041J22Rik	26.2465	12.4044	10.1689	31.0341	23.9832	22.0017	13.0769	0.484754	0.291312	0.620227	16.2733	22.524
A330048O09Rik	0	2.06741	0	0	0	4.40034	4.35896	1.68663	0.280947	NA	0.689135	2.18982
A330069E16Rik	8.74884	0	3.38965	15.5171	2.9979	2.20017	6.53844	0.699525	0.43844	NA	4.04616	6.8134
A330074K22Rik	0	2.06741	6.77929	6.20683	0	2.20017	2.17948	0.0120363	0.992502	NA	2.9489	2.64662
A330076H08Rik	4.37442	6.20222	0	9.31024	8.9937	8.80067	13.0769	1.58225	0.0723387	NA	3.52554	10.0454
A330102I10Rik	6.56163	4.13481	6.77929	3.10341	5.9958	4.40034	4.35896	-0.395378	0.643025	NA	5.82524	4.46463
A3galt2	8.74884	2.06741	1.69482	9.31024	5.9958	8.80067	4.35896	0.79403	0.366032	NA	4.17036	7.11642
A430005L14Rik	209.972	204.673	252.529	183.101	152.893	143.011	143.846	-0.524299	0.00112945	0.0171666	222.391	155.713
A430033K04Rik	135.607	124.044	149.144	121.033	164.885	136.41	148.205	0.0603532	0.723586	0.899477	136.265	142.633
A430035B10Rik	19.6849	24.8089	18.6431	6.20683	17.9874	15.4012	19.6153	-0.481743	0.305518	0.632484	21.0456	14.8027
A430046D13Rik	54.6802	41.3481	33.8965	31.0341	35.9748	46.2035	32.6922	-0.222896	0.474544	0.761598	43.3083	36.4762
A430078G23Rik	21.8721	6.20222	11.8638	12.4137	11.9916	13.201	15.2564	0.032472	0.953474	0.986379	13.3127	13.2157
A430078I02Rik	10.936	12.4044	8.47411	9.31024	8.9937	22.0017	4.35896	0.107402	0.866081	0.954569	10.6049	11.1661
A430088P11Rik	34.9953	18.6066	25.4223	18.6205	23.9832	22.0017	17.4358	-0.361871	0.394027	0.703319	26.3414	20.5103
A430090L17Rik	50.3058	16.5392	47.455	6.20683	17.9874	26.402	10.8974	-1.26388	0.0149517	0.108485	38.1	15.3734
A430093F15Rik	2.18721	2.06741	0	0	5.9958	0	0	-0.032638	0.984306	NA	1.4182	1.49895
A430105I19Rik	104.986	82.6962	40.6757	111.723	107.924	112.209	91.5382	0.497468	0.0720037	0.294276	76.1193	105.849
A4galt	91.8628	111.64	103.384	99.3093	119.916	167.213	156.923	0.424657	0.0257264	0.155054	102.296	135.84
A530013C23Rik	34.9953	28.9437	27.1172	27.9307	47.9664	41.8032	17.4358	0.144939	0.702638	0.886887	30.3521	33.784
A530016L24Rik	181.538	324.583	245.749	117.93	86.9391	182.614	189.615	-0.835557	0.00330776	0.0379184	250.623	144.274
A530032D15Rik	6.56163	0	3.38965	6.20683	0	2.20017	0	-0.679605	0.60945	NA	3.31709	2.10175
A530053G22Rik	15.3105	4.13481	5.08447	9.31024	8.9937	8.80067	6.53844	0.107795	0.87388	0.957618	8.17658	8.41076
A530064D06Rik	0	0	1.69482	0	0	0	2.17948	0.174463	0.929334	NA	0.564941	0.54487
A530065N20Rik	2.18721	0	0	3.10341	0	2.20017	0	0.97145	0.604817	NA	0.72907	1.3259
A530072M11Rik	0	2.06741	3.38965	0	8.9937	0	4.35896	0.813231	0.497885	NA	1.81902	3.33817
A530088E08Rik	0	2.06741	0	3.10341	5.9958	0	0	1.5638	0.395753	NA	0.689135	2.2748
A530099J19Rik	8.74884	10.337	6.77929	3.10341	8.9937	4.40034	8.71792	-0.447984	0.519306	0.788688	8.62172	6.30384
A630001G21Rik	32.8081	35.1459	22.0327	18.6205	38.9727	39.603	21.7948	0.00597224	0.987783	0.996018	29.9956	29.7478
A630012P03Rik	2.18721	0	1.69482	3.10341	0	0	0	-0.693752	0.723306	NA	1.29401	0.775854
A630020A06	2.18721	2.06741	0	3.10341	0	2.20017	2.17948	0.638612	0.66972	NA	1.4182	1.87077
A630023A22Rik	67.8035	22.7415	20.3379	74.4819	47.9664	28.6022	34.8717	0.27884	0.523692	0.792059	36.9609	46.4806
A630033H20Rik	45.9314	37.2133	50.8447	27.9307	17.9874	28.6022	47.9486	-0.521185	0.115789	0.381564	44.6631	30.6172
A630066F11Rik	28.4337	24.8089	27.1172	15.5171	29.979	19.8015	13.0769	-0.473331	0.244205	0.565889	26.7866	19.5936
A630072M18Rik	111.548	66.157	105.079	83.7922	95.9328	85.8066	98.0766	-0.0564395	0.7865	0.923786	94.2612	90.902
A630075F10Rik	6.56163	2.06741	6.77929	12.4137	8.9937	2.20017	4.35896	0.338506	0.670319	NA	5.13611	6.99162
A630076J17Rik	6.56163	6.20222	0	3.10341	2.9979	2.20017	4.35896	-0.18113	0.852246	NA	4.25461	3.16511
A630077J23Rik	41.557	16.5392	16.9482	24.8273	17.9874	37.4029	10.8974	-0.0949438	0.848944	0.948573	25.0148	22.7787
A630089N07Rik	113.735	47.5503	72.8774	49.6546	74.9475	94.6073	63.2049	-0.0761368	0.760148	0.912399	78.0542	70.6036
A630095N17Rik	0	2.06741	6.77929	0	0	2.20017	0	-1.69677	0.22701	NA	2.9489	0.550042
A730017C20Rik	0	0	0	3.10341	0	0	0	1.12046	0.593692	NA	0	0.775854
A730017L22Rik	56.8674	41.3481	44.0654	27.9307	32.9769	24.2019	41.4101	-0.566203	0.0813337	0.314664	47.427	31.6299
A730020E08Rik	4.37442	0	6.77929	3.10341	0	4.40034	0	-1.00903	0.412276	NA	3.7179	1.87594
A730020M07Rik	0	2.06741	5.08447	3.10341	0	0	4.35896	-0.409719	0.770219	NA	2.38396	1.86559
A730056A06Rik	4.37442	2.06741	6.77929	3.10341	0	2.20017	6.53844	-0.542243	0.579304	NA	4.40704	2.96051
A730085K08Rik	34.9953	22.7415	13.5586	18.6205	8.9937	6.60051	6.53844	-1.23015	0.0405419	0.205182	23.7651	10.1883
A730090H04Rik	6.56163	4.13481	6.77929	12.4137	2.9979	15.4012	4.35896	0.580938	0.45187	NA	5.82524	8.79292
A730090N16Rik	39.3698	14.4718	8.47411	15.5171	11.9916	13.201	13.0769	-0.448031	0.404085	0.711461	20.7719	13.4466
A830009L08Rik	2.18721	6.20222	1.69482	3.10341	0	0	2.17948	-1.37388	0.311155	NA	3.36142	1.32072
A830010M20Rik	104.986	84.7636	71.1826	114.826	68.9517	145.211	111.154	0.370433	0.0926179	0.336345	86.9774	110.036
A830018L16Rik	15.3105	6.20222	5.08447	0	5.9958	22.0017	8.71792	0.193645	0.760097	0.912399	8.86572	9.17885
A830052D11Rik	6.56163	0	3.38965	9.31024	5.9958	6.60051	2.17948	0.923986	0.351674	NA	3.31709	6.02151
A830080D01Rik	190.287	152.988	184.736	161.378	191.866	165.013	185.256	-0.00386699	0.982569	0.994892	176.004	175.878
A830082K12Rik	13.1233	12.4044	11.8638	12.4137	8.9937	24.2019	19.6153	0.418974	0.432127	0.730792	12.4638	16.3061
A830082N09Rik	80.9267	37.2133	42.3706	46.5512	50.9643	50.6039	52.3075	-0.0471134	0.865052	0.954569	53.5035	50.1067
A930001C03Rik	2.18721	0	11.8638	6.20683	2.9979	8.80067	17.4358	0.898743	0.282937	NA	4.68366	8.86031
A930003O13Rik	2.18721	0	0	0	2.9979	0	4.35896	1.47313	0.386201	NA	0.72907	1.83922
A930004D18Rik	30.6209	33.0785	18.6431	15.5171	23.9832	30.8024	37.0512	0.0195802	0.962312	0.988374	27.4475	26.8385
A930005H10Rik	41.557	24.8089	23.7275	31.0341	23.9832	48.4037	26.1538	0.152509	0.689247	0.879869	30.0311	32.3937
A930006I01Rik	4.37442	4.13481	3.38965	0	5.9958	6.60051	4.35896	0.192769	0.83946	NA	3.96629	4.23882
A930006K02Rik	24.0593	8.26962	8.47411	9.31024	0	17.6013	10.8974	-0.399166	0.526976	0.793045	13.601	9.45225
A930007I19Rik	19.6849	10.337	5.08447	15.5171	11.9916	19.8015	10.8974	0.374398	0.502838	0.778429	11.7021	14.5519
A930009A15Rik	4.37442	0	3.38965	0	0	0	0	-2.2416	0.240272	NA	2.58802	0
A930012L18Rik	32.8081	12.4044	13.5586	15.5171	23.9832	8.80067	6.53844	-0.47038	0.407593	0.713938	19.5904	13.7098
A930013F10Rik	185.913	74.4266	101.689	117.93	104.927	101.208	76.2818	-0.219296	0.380256	0.693903	120.676	100.086
A930015D03Rik	72.1779	49.6177	40.6757	46.5512	65.9538	55.0042	56.6665	0.0905651	0.744475	0.908053	54.1571	56.0439
A930016O22Rik	6.56163	0	6.77929	0	5.9958	2.20017	0	-1.18516	0.344563	NA	4.44697	2.04899
A930017M01Rik	0	6.20222	1.69482	0	0	0	0	-2.49706	0.101376	NA	2.63235	0
A930019D19Rik	10.936	4.13481	8.47411	15.5171	8.9937	8.80067	10.8974	0.483676	0.44515	0.740264	7.84832	11.0522
A930024E05Rik	15.3105	20.6741	13.5586	27.9307	44.9685	22.0017	26.1538	0.853837	0.0456503	0.221455	16.5144	30.2637
A930041C12Rik	15.3105	0	6.77929	18.6205	5.9958	8.80067	10.8974	0.727558	0.303287	NA	7.36325	11.0786
AA388235	6.56163	20.6741	23.7275	34.1376	17.9874	30.8024	32.6922	0.772168	0.0643332	0.274819	16.9877	28.9049
AA413626	15.3105	2.06741	5.08447	12.4137	0	15.4012	8.71792	0.413827	0.57609	NA	7.48745	9.13319
AA414768	4.37442	0	5.08447	6.20683	0	6.60051	2.17948	0.233868	0.811596	NA	3.15296	3.7467
AA415398	21.8721	45.4829	44.0654	46.5512	20.9853	46.2035	71.9229	0.351987	0.285	0.613595	37.1401	46.4157
AA465934	15.3105	6.20222	13.5586	9.31024	5.9958	15.4012	2.17948	-0.498735	0.49326	NA	11.6904	8.22168
AA467197	4.37442	0	0	0	0	0	2.17948	-0.664981	0.682039	NA	1.45814	0.54487
AA474331	24.0593	20.6741	27.1172	55.8615	26.9811	26.402	32.6922	0.529251	0.145159	0.431875	23.9502	35.4842
AA536875	0	2.06741	0	0	5.9958	0	4.35896	1.85802	0.282532	NA	0.689135	2.58869
AA543186	6.56163	33.0785	20.3379	27.9307	20.9853	6.60051	10.8974	-0.32495	0.521058	0.789861	19.9927	16.6035
AA986860	65.6163	51.6851	57.624	49.6546	47.9664	28.6022	52.3075	-0.398756	0.152048	0.442684	58.3085	44.6327
Aaas	87.4884	107.505	159.313	158.274	158.889	184.814	143.846	0.44883	0.0191501	0.127877	118.102	161.456
Aacs	776.459	996.489	754.196	685.855	563.605	517.04	490.383	-0.58185	0.0646192	0.275461	842.382	564.221
Aaed1	365.264	384.537	433.875	372.41	335.765	371.829	427.178	-0.0593832	0.692638	0.881831	394.559	376.795
Aagab	474.624	541.66	499.973	512.063	530.628	407.031	483.845	-0.0707278	0.51234	0.785898	505.419	483.392
Aak1	1036.74	843.501	855.886	1033.44	929.349	884.468	987.305	0.076412	0.519511	0.788688	912.041	958.64
Aamdc	179.351	229.482	227.106	217.239	176.876	176.013	207.051	-0.126156	0.380216	0.693903	211.98	194.295
Aamp	1213.9	1467.86	1284.68	1269.3	1130.21	1139.69	1113.71	-0.183575	0.190837	0.497131	1322.14	1163.23
Aanat	13.1233	4.13481	5.08447	18.6205	8.9937	13.201	6.53844	0.718533	0.338503	NA	7.44751	11.8384
Aar2	266.84	361.796	355.913	322.755	308.784	288.222	322.563	-0.073173	0.57317	0.819949	328.183	310.581
Aard	0	2.06741	5.08447	6.20683	0	2.20017	0	-0.353086	0.776074	NA	2.38396	2.10175
Aars	1161.41	1403.77	1274.51	1629.29	1606.87	1256.3	1261.92	0.16002	0.157684	0.451086	1279.89	1438.6
Aars2	157.479	173.662	98.2997	189.308	188.868	167.213	176.538	0.340732	0.106717	0.364195	143.147	180.482
Aarsd1	264.652	324.583	284.73	238.963	233.836	217.817	217.948	-0.360346	0.00926423	0.0778113	291.322	227.141
Aasdh	234.031	188.134	215.243	214.136	209.853	268.421	226.666	0.12017	0.4423	0.738522	212.469	229.769
Aasdhppt	457.127	574.739	405.063	359.996	380.733	299.223	414.101	-0.396913	0.00523637	0.0520234	478.976	363.513
Aass	376.2	357.661	267.782	186.205	167.882	129.81	198.333	-0.953194	1.17692e-10	2.70921e-08	333.881	170.557
Aatf	299.648	523.054	438.959	471.719	503.647	367.428	377.05	0.0361821	0.783572	0.922245	420.553	429.961
Aatk	85.3012	70.2918	59.3188	93.1024	98.9307	101.208	74.1023	0.353984	0.178088	0.48165	71.6372	91.8358
AB124611	39.3698	12.4044	25.4223	12.4137	20.9853	24.2019	17.4358	-0.396639	0.355214	0.673102	25.7322	18.7592
Abat	80.9267	111.64	89.8256	86.8956	98.9307	156.212	126.41	0.290232	0.225376	0.542781	94.1307	117.112
Abca1	1784.76	2319.63	1859.22	2287.22	2260.42	2844.82	2715.63	0.338851	0.00443888	0.0464797	1987.87	2527.02
Abca12	6.56163	2.06741	3.38965	0	2.9979	2.20017	4.35896	-0.617006	0.563185	NA	4.00623	2.38926
Abca13	0	2.06741	1.69482	0	0	0	0	-1.3822	0.391768	NA	1.25408	0
Abca17	0	2.06741	0	3.10341	2.9979	0	4.35896	1.86031	0.248368	NA	0.689135	2.61507
Abca2	616.793	814.558	716.91	844.129	749.475	811.862	666.921	0.103709	0.426284	0.727082	716.087	768.097
Abca3	968.934	1279.72	1328.74	1309.64	1316.08	1324.5	1216.15	0.126083	0.200464	0.51	1192.47	1291.59
Abca4	13.1233	8.26962	5.08447	9.31024	20.9853	4.40034	17.4358	0.588501	0.371051	0.68677	8.82578	13.0329
Abca5	225.283	233.617	266.087	223.446	215.849	275.021	254.999	-0.00069915	0.996071	0.999135	241.662	242.329
Abca6	209.972	237.752	255.918	173.791	239.832	235.418	296.409	0.00379281	0.982487	0.994892	234.547	236.363
Abca7	249.342	246.021	269.477	273.1	251.824	266.22	222.307	-0.012512	0.939964	0.979996	254.947	253.363
Abca8a	975.495	1207.36	1147.4	841.025	995.303	1139.69	1233.59	-0.0857045	0.581263	0.824082	1110.09	1052.4
Abca8b	225.283	190.201	137.281	148.964	200.859	173.813	180.897	-0.0455495	0.796213	0.927027	184.255	176.133
Abca9	673.66	824.895	720.3	524.477	722.494	882.268	869.613	0.00764691	0.958774	0.987631	739.618	749.713
Abcb10	277.776	361.796	306.763	288.618	326.771	242.019	379.23	-0.0268744	0.853049	0.950333	315.445	309.159
Abcb11	2.18721	2.06741	1.69482	3.10341	5.9958	0	0	-0.0137003	0.991651	NA	1.98315	2.2748
Abcb1a	102.799	157.123	135.586	139.654	149.895	147.411	154.743	0.154622	0.412819	0.71641	131.836	147.926
Abcb1b	63.4291	53.7525	54.2343	71.3785	56.9601	88.0067	74.1023	0.360899	0.135383	0.416234	57.1386	72.6119
Abcb4	6.56163	18.6066	27.1172	0	0	6.60051	4.35896	-2.38466	0.0083118	NA	17.4285	2.73987
Abcb6	275.588	343.189	333.88	266.894	227.84	242.019	250.64	-0.358619	0.00529475	0.0523315	317.553	246.848
Abcb7	748.026	748.401	784.703	688.958	641.551	666.651	695.254	-0.179379	0.10592	0.363038	760.376	673.103
Abcb8	380.574	417.616	389.809	449.995	431.698	371.829	357.435	0.0163922	0.899417	0.966893	396	402.739
Abcb9	146.543	190.201	147.45	145.86	104.927	114.409	108.974	-0.440844	0.0562948	0.252974	161.398	118.542
Abcc1	349.953	343.189	310.153	394.134	368.742	433.433	383.589	0.240397	0.0747946	0.301289	334.432	394.974
Abcc10	247.155	157.123	171.177	170.688	170.88	195.815	178.717	-0.0738046	0.688478	0.87941	191.818	179.025
Abcc12	0	2.06741	0	6.20683	0	0	2.17948	1.53553	0.379631	NA	0.689135	2.09658
Abcc2	4.37442	0	0	0	0	0	0	-1.1571	0.511401	NA	1.45814	0
Abcc3	98.4244	183.999	128.807	139.654	146.897	169.413	113.333	0.0579213	0.794209	0.926328	137.077	142.324
Abcc4	115.922	150.921	138.975	105.516	134.906	151.812	122.051	-0.0812863	0.700588	0.88571	135.273	128.571
Abcc5	409.008	270.83	299.984	301.031	275.807	431.233	405.383	0.129157	0.361448	0.677446	326.607	353.364
Abcc6	2.18721	2.06741	1.69482	3.10341	2.9979	4.40034	0	0.40622	0.772263	NA	1.98315	2.62541
Abcc8	2.18721	0	0	0	0	0	0	-0.559486	0.767038	NA	0.72907	0
Abcc9	520.556	690.513	569.46	617.579	743.479	591.845	625.511	0.116268	0.364668	0.680779	593.51	644.604
Abcd1	297.46	272.897	254.223	260.687	227.84	248.619	281.153	-0.102671	0.523729	0.792059	274.86	254.575
Abcd2	656.163	932.4	837.242	1098.61	776.456	1394.91	1192.18	0.457424	0.00923654	0.0777722	808.602	1115.54
Abcd3	2290.01	2743.45	2642.23	2451.7	2428.3	2063.76	2510.76	-0.114871	0.273946	0.598922	2558.56	2363.63
Abcd4	109.36	134.381	106.774	145.86	86.9391	138.611	128.589	0.110542	0.561662	0.812409	116.839	125
Abce1	2576.53	3127.98	2504.95	2622.39	2749.07	1953.75	2299.35	-0.195329	0.056008	0.252239	2736.49	2406.14
Abcf1	1185.47	1552.62	1357.55	1464.81	1534.92	1322.3	1205.25	0.0174912	0.882422	0.959757	1365.21	1381.82
Abcf2	632.103	951.006	967.744	918.611	884.381	726.056	793.331	-0.0286852	0.779621	0.920008	850.285	830.594
Abcf3	927.377	895.186	742.332	816.198	701.509	631.448	649.485	-0.291316	0.0414902	0.208016	854.965	699.66
Abcg1	242.78	297.706	169.482	273.1	251.824	281.622	211.41	0.105472	0.608538	0.840908	236.656	254.489
Abcg2	6563.82	7692.81	5487.84	3820.3	3831.32	1718.33	2118.45	-1.2714	4.70448e-14	2.91923e-11	6581.49	2872.1
Abcg3	102.799	64.0896	61.0136	40.3444	59.958	70.4054	78.4613	-0.207959	0.38246	0.694613	75.9673	62.2923
Abcg4	4.37442	18.6066	6.77929	9.31024	20.9853	22.0017	4.35896	0.540875	0.427617	0.728711	9.92012	14.164
Abcg5	4.37442	10.337	3.38965	12.4137	2.9979	13.201	19.6153	1.11182	0.127831	NA	6.0337	12.057
Abcg8	4.37442	2.06741	0	3.10341	0	4.40034	2.17948	0.293734	0.827433	NA	2.14727	2.42081
Abhd1	6.56163	0	0	9.31024	2.9979	6.60051	4.35896	1.53536	0.188064	NA	2.18721	5.8169
Abhd10	148.73	109.572	113.553	93.1024	119.916	101.208	117.692	-0.184376	0.32419	0.647412	123.952	107.98
Abhd11	454.94	589.21	530.48	571.028	536.624	481.837	462.05	-0.032033	0.75266	0.910494	524.877	512.885
Abhd11os	48.1186	59.9548	67.7929	65.1717	53.9622	35.2027	47.9486	-0.235889	0.415182	0.71824	58.6221	50.5713
Abhd12	564.3	750.468	710.131	673.441	563.605	616.047	675.639	-0.0887956	0.429753	0.729562	674.966	632.183
Abhd13	912.066	1064.71	942.322	921.714	878.385	710.654	911.023	-0.191575	0.0465206	0.224139	973.034	855.444
Abhd14a	137.794	152.988	149.144	121.033	116.918	134.21	124.23	-0.231408	0.232339	0.551646	146.642	124.098
Abhd14b	286.524	359.729	352.523	359.996	317.777	398.231	344.358	0.0998225	0.449673	0.743658	332.925	355.09
Abhd15	65.6163	105.438	83.0463	77.5854	65.9538	96.8074	98.0766	0.016163	0.941992	0.980821	84.7001	84.6058
Abhd16a	367.451	479.638	447.433	443.788	503.647	479.637	409.742	0.096229	0.410876	0.716302	431.507	459.204
Abhd16b	8.74884	12.4044	5.08447	12.4137	11.9916	6.60051	4.35896	-0.018837	0.978024	NA	8.74591	8.84118
Abhd17a	376.2	382.47	323.711	294.824	239.832	224.417	244.102	-0.529451	0.00229653	0.0290825	360.794	250.794
Abhd17b	450.565	489.975	510.142	449.995	428.7	336.626	512.178	-0.16712	0.283356	0.611716	483.561	431.875
Abhd17c	1751.95	2879.9	2781.2	2476.52	2401.32	2252.97	2373.45	-0.0220959	0.897141	0.96561	2471.02	2376.07
Abhd2	785.208	1126.74	1255.86	1393.43	1409.01	1273.9	1438.46	0.399813	4.12209e-05	0.001328	1055.94	1378.7
Abhd3	28.4337	55.8199	30.5068	27.9307	41.9706	39.603	26.1538	-0.187572	0.585335	0.827017	38.2535	33.9145
Abhd4	583.985	702.918	657.591	611.373	632.557	701.854	703.972	0.0381061	0.740912	0.906887	648.165	662.439
Abhd5	3884.48	3446.36	2454.1	2249.98	2194.46	1509.32	1732.69	-0.76265	7.22831e-22	1.71937e-18	3261.65	1921.61
Abhd6	52.493	62.0222	54.2343	43.4478	68.9517	83.6064	45.7691	0.104549	0.703134	0.886887	56.2498	60.4438
Abhd8	69.9907	84.7636	77.9619	58.9649	62.9559	77.0059	58.846	-0.252751	0.322931	0.646544	77.5721	64.4432
Abi1	1108.92	1118.47	1120.28	946.541	1136.2	939.472	1111.54	-0.110522	0.259551	0.585371	1115.89	1033.44
Abi2	393.698	419.683	396.589	369.306	407.714	514.839	486.024	0.138004	0.26424	0.589704	403.323	444.471
Abi3	80.9267	51.6851	55.9292	37.241	62.9559	88.0067	58.846	0.00855233	0.975169	0.992519	62.847	61.7624
Abi3bp	314.958	217.078	240.665	189.308	182.872	224.417	272.435	-0.224654	0.178928	0.482643	257.567	217.258
Abl1	1441.37	1298.33	1305.01	1573.43	1615.87	1592.92	1405.76	0.196721	0.0912748	0.333304	1348.24	1547
Abl2	741.464	744.266	786.398	664.131	821.425	785.46	791.151	0.0196224	0.833327	0.941144	757.376	765.542
Ablim1	1093.6	990.287	906.73	1095.51	1118.22	1282.7	1270.64	0.261652	0.00801061	0.0705725	996.874	1191.76
Ablim2	32.8081	37.2133	28.812	27.9307	29.979	35.2027	26.1538	-0.131967	0.714606	0.893853	32.9445	29.8165
Ablim3	332.456	355.594	218.632	384.823	341.761	367.428	383.589	0.29534	0.0665572	0.279878	302.227	369.4
Abo	2.18721	0	0	6.20683	0	2.20017	0	1.52869	0.416711	NA	0.72907	2.10175
Abr	907.692	1079.19	652.507	719.992	665.534	591.845	586.28	-0.455095	0.0126776	0.0966535	879.795	640.913
Abra	13.1233	20.6741	30.5068	6.20683	14.9895	4.40034	8.71792	-1.26882	0.138799	0.422524	21.4347	8.57865
Abracl	454.94	409.346	433.875	325.859	293.794	255.22	309.486	-0.554271	1.73445e-05	0.000663649	432.72	296.09
Abt1	139.981	159.19	149.144	127.24	155.891	136.41	135.128	-0.107962	0.513502	0.786516	149.439	138.667
Abtb1	179.351	219.145	216.937	220.342	188.868	268.421	231.025	0.167991	0.322503	0.646544	205.144	227.164
Abtb2	328.081	293.572	250.834	397.237	314.78	312.424	237.563	0.113233	0.560435	0.811685	290.829	315.501
Acaa1a	505.245	593.345	533.869	468.616	545.618	479.637	483.845	-0.135937	0.309224	0.635834	544.153	494.429
Acaa1b	6.56163	37.2133	28.812	55.8615	35.9748	72.6056	41.4101	1.23277	0.00211606	0.0273752	24.1956	51.463
Acaa2	833.327	1149.48	1120.28	884.473	998.301	959.274	1009.1	-0.0899322	0.479798	0.764506	1034.36	962.787
Acaca	19960.5	20932.5	15378.8	15340.2	13490.6	10787.4	9537.41	-0.619872	3.54406e-05	0.00118456	18757.3	12288.9
Acacb	2246.26	2055	1482.97	1030.33	1022.28	829.464	1002.56	-0.978674	1.00122e-06	5.92924e-05	1928.08	971.161
Acad10	111.548	152.988	89.8256	114.826	101.929	79.2061	102.436	-0.243356	0.243023	0.564247	118.12	99.5991
Acad11	774.272	849.704	703.351	707.578	605.576	638.049	612.434	-0.275691	0.0111169	0.0883414	775.776	640.909
Acad12	34.9953	55.8199	55.9292	27.9307	44.9685	41.8032	32.6922	-0.398687	0.211258	0.524734	48.9148	36.8487
Acad8	374.013	361.796	337.27	288.618	302.788	270.621	329.102	-0.259378	0.025752	0.155143	357.693	297.782
Acad9	1270.77	1639.45	2050.74	1657.22	1903.67	1832.74	2162.04	0.213234	0.0891639	0.329846	1653.65	1888.92
Acadl	1268.58	1385.16	1610.08	1787.57	1687.82	1658.93	1427.56	0.204389	0.224395	0.541871	1421.27	1640.47
Acadm	925.19	1143.28	1159.26	1083.09	1121.21	1023.08	1277.18	0.0686111	0.504777	0.779926	1075.91	1126.14
Acads	457.127	607.817	649.117	524.477	524.633	499.438	494.742	-0.143763	0.209707	0.522783	571.354	510.822
Acadsb	2025.36	2069.47	1852.44	1349.99	1415.01	1040.68	1283.71	-0.647942	3.17157e-09	4.15272e-07	1982.42	1272.35
Acadvl	1447.93	1918.55	1737.19	1427.57	1570.9	1601.72	1492.94	-0.151938	0.13101	0.408604	1701.23	1523.28
Acan	4.37442	0	1.69482	0	0	0	0	-1.77153	0.340145	NA	2.02308	0
Acap1	54.6802	26.8763	28.812	43.4478	53.9622	22.0017	28.3332	-0.00760597	0.982832	0.994892	36.7895	36.9362
Acap2	2834.62	2679.36	2049.04	2163.08	2209.45	1779.94	2118.45	-0.280298	0.0356423	0.190117	2521.01	2067.73
Acap3	262.465	248.089	271.172	291.721	257.819	217.817	222.307	-0.0874045	0.57959	0.82324	260.575	247.416
Acat1	1511.36	1616.71	1637.2	1384.12	1331.07	1216.69	1451.53	-0.24376	0.00953863	0.0794718	1588.42	1345.85
Acat2	367.451	310.111	313.542	211.032	194.864	184.814	202.692	-0.739158	0.000115555	0.0030884	330.368	198.35
Acat3	17.4977	8.26962	15.2534	15.5171	17.9874	15.4012	6.53844	-0.00449452	0.99364	0.998327	13.6736	13.861
Acbd3	684.597	764.94	652.507	766.543	692.515	609.447	725.767	-0.00858856	0.933979	0.977668	700.681	698.568
Acbd4	275.588	353.526	308.458	316.548	287.798	286.022	278.973	-0.0969022	0.590212	0.829903	312.524	292.336
Acbd5	713.03	880.715	750.807	744.819	812.431	686.453	802.049	-0.0415481	0.711031	0.892149	781.517	761.438
Acbd6	172.79	219.145	215.243	155.171	188.868	202.416	191.794	-0.112616	0.445706	0.740353	202.392	184.562
Acbd7	148.73	124.044	174.567	102.413	83.9412	88.0067	95.8971	-0.698896	0.0195382	0.129398	149.114	92.5644
Accs	111.548	107.505	111.858	121.033	116.918	134.21	135.128	0.211824	0.30525	0.632198	110.304	126.822
Accsl	0	2.06741	0	3.10341	0	2.20017	0	0.86777	0.625542	NA	0.689135	1.3259
Acd	89.6756	99.2355	142.365	139.654	140.901	125.41	106.795	0.208393	0.285098	0.613621	110.425	128.19
Ace	428.693	626.424	496.583	487.236	551.614	437.834	466.409	-0.0913965	0.600303	0.836354	517.233	485.773
Ace2	37.1826	20.6741	25.4223	0	23.9832	17.6013	17.4358	-0.829134	0.0556936	0.251299	27.7597	14.7551
Acer2	139.981	155.055	154.229	229.653	152.893	231.018	156.923	0.358439	0.0706032	0.290808	149.755	192.621
Acer3	374.013	318.38	294.899	276.204	293.794	233.218	289.871	-0.265938	0.0288415	0.166354	329.097	273.272
Ache	6.56163	8.26962	1.69482	6.20683	5.9958	4.40034	6.53844	0.122392	0.885245	NA	5.50869	5.78535
Acin1	1517.92	1414.11	1281.29	1629.29	1681.82	1520.32	1401.41	0.145918	0.166448	0.464919	1404.44	1558.21
Ackr1	24.0593	26.8763	35.5913	43.4478	32.9769	17.6013	28.3332	0.0462516	0.90273	0.968221	28.8423	30.5898
Ackr2	24.0593	35.1459	42.3706	15.5171	32.9769	37.4029	23.9743	-0.313335	0.412606	0.716302	33.8586	27.4678
Ackr3	196.849	200.538	244.054	152.067	167.882	83.6064	198.333	-0.513003	0.0521398	0.241682	213.814	150.472
Ackr4	164.041	146.786	179.651	217.239	173.878	145.211	193.974	0.151015	0.386274	0.696601	163.493	182.576
Acly	15177	19324	13545	10672.6	10813.4	8761.07	9997.28	-0.685603	0.0367364	0.193332	16015.4	10061.1
Acmsd	2.18721	0	3.38965	6.20683	0	11.0008	10.8974	1.92686	0.0631309	NA	1.85895	7.02627
Acnat1	2.18721	10.337	20.3379	21.7239	11.9916	6.60051	26.1538	0.936761	0.148729	0.437933	10.954	16.6174
Aco1	1821.95	2286.55	1943.96	2215.84	2278.4	1870.14	1909.22	0.0330171	0.75328	0.910571	2017.49	2068.4
Aco2	3453.6	4540.02	3884.53	3364.1	3531.53	2915.22	3249.61	-0.279624	0.018219	0.123643	3959.39	3265.11
Acot1	835.514	1664.26	2101.58	1427.57	1756.77	1977.95	1543.07	0.225954	0.528733	0.793797	1533.79	1676.34
Acot10	2.18721	2.06741	5.08447	3.10341	0	0	0	-1.84215	0.241395	NA	3.11303	0.775854
Acot11	96.2372	62.0222	50.8447	37.241	14.9895	50.6039	50.128	-0.784922	0.0173186	0.119869	69.7014	38.2406
Acot13	269.027	299.774	310.153	226.549	209.853	200.215	241.922	-0.414065	0.00265088	0.032475	292.984	219.635
Acot2	96.2372	179.864	164.398	142.757	206.855	162.812	163.461	0.226657	0.257086	0.582031	146.833	168.971
Acot3	39.3698	22.7415	15.2534	31.0341	17.9874	33.0025	4.35896	-0.231349	0.634083	0.854949	25.7882	21.5958
Acot4	63.4291	47.5503	28.812	46.5512	26.9811	44.0034	32.6922	-0.259142	0.412294	0.716302	46.5971	37.557
Acot5	2.18721	8.26962	6.77929	18.6205	11.9916	4.40034	4.35896	0.642732	0.392316	NA	5.74537	9.84285
Acot6	284.337	268.763	196.599	229.653	275.807	143.011	143.846	-0.369424	0.0443005	0.216823	249.9	198.079
Acot7	76.5523	88.8984	62.7084	34.1376	56.9601	123.209	74.1023	-0.0800713	0.784015	0.922492	76.0531	72.1024
Acot8	124.671	109.572	106.774	49.6546	86.9391	94.6073	93.7177	-0.450396	0.0420128	0.2098	113.672	81.2297
Acot9	415.57	376.268	445.738	328.962	353.752	330.025	401.024	-0.221226	0.0978355	0.346706	412.525	353.441
Acox1	1281.7	1575.36	1355.86	1756.53	1633.86	1667.73	1562.69	0.237124	0.0112929	0.0892919	1404.31	1655.2
Acox2	10.936	16.5392	10.1689	18.6205	20.9853	30.8024	39.2306	1.18921	0.0115987	0.0911545	12.5481	27.4097
Acox3	332.456	353.526	328.796	356.893	425.702	365.228	320.384	0.114876	0.369382	0.685622	338.259	367.052
Acoxl	4.37442	0	1.69482	3.10341	0	2.20017	2.17948	-0.0273979	0.983562	NA	2.02308	1.87077
Acp1	389.323	401.077	430.485	387.927	356.75	312.424	379.23	-0.186352	0.127722	0.403	406.962	359.083
Acp2	382.762	430.02	418.621	481.029	458.679	488.437	448.973	0.189667	0.0686917	0.285323	410.468	469.28
Acp5	343.392	583.008	455.907	515.167	491.656	433.433	453.332	0.0489225	0.772851	0.917639	460.769	473.397
Acp6	181.538	217.078	245.749	195.515	188.868	226.617	185.256	-0.101967	0.515779	0.787378	214.788	199.064
Acpp	39.3698	49.6177	45.7602	68.2751	71.9496	52.804	39.2306	0.352174	0.294686	0.62308	44.9159	58.0649
Acpt	13.1233	8.26962	5.08447	12.4137	2.9979	13.201	15.2564	0.444384	0.502188	NA	8.82578	10.9672
Acr	2.18721	2.06741	0	6.20683	2.9979	11.0008	0	1.91859	0.159735	NA	1.4182	5.05139
Acrbp	113.735	62.0222	50.8447	83.7922	80.9433	94.6073	58.846	0.110415	0.69418	0.882299	75.5339	79.5472
Acrv1	2.18721	8.26962	0	3.10341	2.9979	2.20017	4.35896	-0.019146	0.985979	NA	3.48561	3.16511
Acsbg1	21.8721	16.5392	3.38965	3.10341	20.9853	19.8015	19.6153	0.281189	0.620905	0.846782	13.9337	15.8764
Acsf2	129.045	155.055	174.567	142.757	170.88	151.812	176.538	0.0587301	0.738689	0.905719	152.889	160.497
Acsf3	225.283	231.549	225.411	220.342	206.855	261.82	237.563	0.0426656	0.778277	0.919359	227.414	231.645
Acsl1	22348.9	32369.4	19954.8	17431.9	16830.2	12455.2	14423.8	-0.704843	5.93356e-10	1.07195e-07	24891	15285.3
Acsl3	330.269	489.975	516.921	468.616	545.618	730.456	658.203	0.41901	0.0591477	0.261673	445.722	600.723
Acsl4	7237.48	9522.47	7969.06	5669.94	5273.31	5080.19	5263.45	-0.611676	0.0295434	0.168657	8243	5321.72
Acsl5	826.765	996.489	988.082	1095.51	1154.19	1108.89	1216.15	0.290238	0.00376309	0.0414085	937.112	1143.68
Acsl6	0	4.13481	10.1689	0	0	4.40034	2.17948	-1.06443	0.411986	NA	4.76792	1.64495
Acsm3	30.6209	28.9437	22.0327	27.9307	23.9832	15.4012	23.9743	-0.259751	0.55964	0.811518	27.1991	22.8223
Acsm4	0	0	0	0	5.9958	4.40034	4.35896	3.34891	0.0306688	NA	0	3.68877
Acsm5	19.6849	31.0111	25.4223	24.8273	17.9874	19.8015	21.7948	-0.273435	0.498889	0.777219	25.3728	21.1028
Acss1	1310.14	1722.15	1752.45	1346.88	1307.08	1139.69	1416.66	-0.286258	0.0143008	0.105099	1594.91	1302.58
Acss2	413.383	709.12	662.676	347.582	404.717	411.432	411.922	-0.603095	0.0648733	0.275897	595.059	393.913
Acss2os	15.3105	8.26962	1.69482	3.10341	2.9979	4.40034	4.35896	-0.922777	0.305894	NA	8.42497	3.71515
Acss3	188.1	165.392	210.158	282.411	164.885	246.419	233.204	0.300977	0.106346	0.363856	187.883	231.73
Acta1	26.2465	3795.76	5879.34	62.0683	59.958	44.0034	63.2049	-3.88556	0.000181357	0.0044245	3233.78	57.3086
Acta2	10220.8	12309.3	12560.3	10539.2	10948.3	11370.5	11862.9	-0.0598774	0.512085	0.785898	11696.8	11180.2
Actb	17141.2	23485.7	23590.2	26925.2	26579.4	24252.5	25654.7	0.284641	1.82852e-05	0.000694061	21405.7	25852.9
Actbl2	4.37442	4.13481	3.38965	3.10341	0	0	0	-2.3227	0.10068	NA	3.96629	0.775854
Actc1	4.37442	8.26962	11.8638	12.4137	0	0	0	-1.47574	0.140749	NA	8.16927	3.10341
Actg1	1710.4	2342.37	2496.47	2852.04	2943.94	2728.21	2794.09	0.390484	6.26029e-10	1.11151e-07	2183.08	2829.57
Actg2	478.999	465.166	577.935	400.34	413.71	490.638	457.691	-0.202597	0.156149	0.448586	507.367	440.595
Actl10	2.18721	4.13481	1.69482	0	5.9958	0	2.17948	-0.3982	0.770214	NA	2.67228	2.04382
Actl6a	697.72	779.412	786.398	648.614	698.511	587.445	675.639	-0.211248	0.0260461	0.156584	754.51	652.552
Actl7a	10.936	6.20222	3.38965	9.31024	0	4.40034	10.8974	-0.138041	0.887642	NA	6.84264	6.152
Actl9	2.18721	0	5.08447	6.20683	5.9958	0	0	0.0828551	0.948452	NA	2.42389	3.05066
Actn1	1235.77	1114.33	1271.12	1508.26	1424	1399.31	1279.36	0.217574	0.0663785	0.279538	1207.07	1402.73
Actn2	13.1233	150.921	171.177	9.31024	5.9958	2.20017	10.8974	-3.41275	0.00212646	0.0274402	111.74	7.1009
Actn3	2.18721	566.469	799.956	6.20683	5.9958	2.20017	8.71792	-4.1801	0.00103844	0.0161798	456.204	5.78018
Actn4	4750.62	5023.79	4684.49	5443.39	4889.58	4494.94	3929.6	-0.0459812	0.67173	0.872756	4819.63	4689.38
Actr10	581.798	632.626	596.578	518.27	578.595	510.439	568.844	-0.15066	0.16523	0.463292	603.667	544.037
Actr1a	1076.11	1488.53	1676.18	1725.5	1717.8	1553.32	1619.35	0.241548	0.00095603	0.0153481	1413.61	1653.99
Actr1b	783.021	1048.17	845.717	896.887	875.387	730.456	788.972	-0.116431	0.32407	0.647412	892.304	822.925
Actr2	2421.24	2540.84	2452.41	2740.31	2581.19	2105.56	2417.04	-0.0167422	0.854355	0.950841	2471.5	2461.03
Actr3	1708.21	1755.23	2057.51	1880.67	2068.55	1720.53	2083.58	0.0716643	0.487484	0.769894	1840.32	1938.33
Actr3b	21.8721	16.5392	44.0654	15.5171	26.9811	22.0017	28.3332	-0.265418	0.487987	0.770339	27.4922	23.2083
Actr5	98.4244	113.707	105.079	127.24	80.9433	118.809	82.8203	-0.0427038	0.840719	0.944828	105.737	102.453
Actr6	111.548	111.64	122.027	130.343	92.9349	99.0076	111.154	-0.10146	0.587851	0.828377	115.072	108.36
Actr8	319.333	359.729	347.439	273.1	371.74	347.627	335.64	-0.0423825	0.749193	0.908838	342.167	332.027
Acvr1	334.643	372.133	374.556	310.341	293.794	341.026	344.358	-0.155764	0.357394	0.67491	360.444	322.38
Acvr1b	573.049	634.693	586.409	661.027	680.523	602.846	616.793	0.096916	0.339687	0.661936	598.05	640.297
Acvr1c	398.072	378.335	462.687	533.787	389.727	627.048	555.768	0.349367	0.0647854	0.275691	413.031	526.582
Acvr2a	647.414	616.087	630.474	642.407	539.622	506.039	575.383	-0.16567	0.151575	0.442025	631.325	565.863
Acvr2b	41.557	53.7525	44.0654	55.8615	29.979	57.2044	37.0512	-0.0194716	0.953536	0.986379	46.4583	45.024
Acvrl1	450.565	444.492	342.354	350.686	359.748	356.427	335.64	-0.226775	0.183647	0.489903	412.47	350.625
Acy1	122.484	173.662	157.619	170.688	146.897	165.013	122.051	0.00113885	0.995117	0.998907	151.255	151.162
Acy3	17.4977	16.5392	18.6431	24.8273	23.9832	52.804	34.8717	0.992602	0.0124307	0.095449	17.56	34.1216
Acyp1	80.9267	90.9658	81.3515	37.241	53.9622	66.0051	100.256	-0.347963	0.165219	0.463292	84.4147	64.3661
Acyp2	78.7395	78.5614	91.5204	74.4819	71.9496	92.4071	63.2049	-0.146719	0.530783	0.794903	82.9405	75.5109
Ada	260.278	246.021	327.101	248.273	260.817	257.42	239.743	-0.145901	0.391994	0.701985	277.8	251.563
Adal	188.1	196.403	157.619	164.481	155.891	147.411	176.538	-0.156139	0.309555	0.635834	180.707	161.08
Adam10	1367.01	1480.26	1547.37	1315.85	1388.03	1401.51	1492.94	-0.0693266	0.512493	0.785898	1464.88	1399.58
Adam11	17.4977	22.7415	13.5586	15.5171	14.9895	8.80067	13.0769	-0.470808	0.415985	0.719053	17.9326	13.096
Adam12	229.657	198.471	257.613	214.136	260.817	387.23	377.05	0.429972	0.0239126	0.147421	228.58	309.808
Adam15	483.373	525.121	493.193	586.545	530.628	653.45	455.511	0.151472	0.339663	0.661936	500.563	556.534
Adam17	684.597	837.299	866.054	927.921	938.343	1016.48	1033.07	0.304726	0.00181745	0.02468	795.983	978.954
Adam19	409.008	401.077	354.218	403.444	440.691	455.435	490.383	0.207601	0.151962	0.442538	388.101	447.488
Adam1a	52.493	28.9437	47.455	24.8273	44.9685	57.2044	61.0255	0.158542	0.619944	0.846197	42.9639	47.0064
Adam21	10.936	4.13481	10.1689	3.10341	5.9958	13.201	4.35896	-0.293678	0.710135	NA	8.41326	6.6648
Adam22	129.045	84.7636	98.2997	96.2058	125.912	134.21	115.512	0.199292	0.328928	0.652644	104.036	117.96
Adam23	247.155	299.774	271.172	235.859	215.849	503.839	292.05	0.169315	0.383355	0.694613	272.7	311.899
Adam28	2.18721	0	10.1689	12.4137	5.9958	4.40034	4.35896	0.642663	0.456871	NA	4.11872	6.79219
Adam3	0	2.06741	1.69482	0	0	6.60051	2.17948	1.13838	0.482583	NA	1.25408	2.195
Adam32	0	0	5.08447	6.20683	8.9937	6.60051	4.35896	1.73977	0.112479	NA	1.69482	6.54
Adam33	54.6802	45.4829	33.8965	55.8615	41.9706	35.2027	37.0512	-0.0853315	0.805643	0.930652	44.6865	42.5215
Adam4	131.233	18.6066	61.0136	43.4478	29.979	61.6047	41.4101	-0.472888	0.230099	0.548614	70.2843	44.1104
Adam5	0	2.06741	8.47411	0	0	6.60051	6.53844	-0.0624196	0.954984	NA	3.51384	3.28474
Adam7	0	0	1.69482	0	0	2.20017	0	0.191072	0.932794	NA	0.564941	0.550042
Adam8	89.6756	82.6962	77.9619	102.413	110.922	96.8074	117.692	0.360728	0.159833	0.454105	83.4445	106.959
Adam9	1104.54	1329.34	1250.78	1564.12	1555.91	1300.3	1218.33	0.189549	0.0285735	0.165773	1228.22	1409.67
Adamdec1	69.9907	88.8984	69.4877	145.86	113.92	61.6047	61.0255	0.281887	0.335987	0.658546	76.1256	95.6027
Adamts1	293.086	427.953	345.744	477.926	503.647	420.232	433.717	0.371852	0.0817776	0.315015	355.594	458.88
Adamts10	334.643	272.897	262.698	344.479	242.83	363.028	357.435	0.172696	0.352738	0.671693	290.079	326.943
Adamts12	1187.65	1604.31	1396.53	1337.57	1334.07	1881.14	1723.97	0.15763	0.281714	0.609184	1396.17	1569.19
Adamts13	6.56163	6.20222	6.77929	6.20683	11.9916	19.8015	4.35896	0.718931	0.309837	NA	6.51438	10.5897
Adamts14	76.5523	41.3481	61.0136	52.758	38.9727	72.6056	93.7177	0.134522	0.638729	0.857741	59.638	64.5135
Adamts15	531.492	541.66	527.09	505.857	575.597	635.849	509.998	0.0594485	0.702932	0.886887	533.414	556.825
Adamts16	26.2465	6.20222	38.9809	9.31024	35.9748	11.0008	19.6153	-0.339269	0.534785	0.797373	23.8099	18.9753
Adamts17	65.6163	57.8873	84.7411	68.2751	56.9601	99.0076	98.0766	0.204669	0.45661	0.747928	69.4149	80.5799
Adamts18	122.484	99.2355	152.534	136.55	173.878	261.82	233.204	0.658732	0.000220294	0.00507922	124.751	201.363
Adamts19	24.0593	8.26962	13.5586	6.20683	0	4.40034	8.71792	-1.58213	0.02791	0.163318	15.2958	4.83127
Adamts2	612.419	676.042	574.545	555.511	569.601	803.062	738.844	0.0999394	0.405009	0.712315	621.002	666.754
Adamts20	34.9953	22.7415	38.9809	34.1376	20.9853	68.2052	32.6922	0.257012	0.459095	0.748994	32.2392	39.0051
Adamts3	133.42	150.921	194.905	189.308	203.857	286.022	217.948	0.472988	0.00726063	0.0657093	159.748	224.284
Adamts4	54.6802	57.8873	64.4033	99.3093	86.9391	140.811	74.1023	0.757037	0.00496394	0.0504237	58.9903	100.29
Adamts5	4619.39	5280.15	3840.47	3761.34	3264.71	3064.83	3131.91	-0.478662	6.0124e-05	0.00183889	4580	3305.7
Adamts6	67.8035	33.0785	22.0327	43.4478	23.9832	26.402	41.4101	-0.176094	0.641135	0.8591	40.9716	33.8108
Adamts7	146.543	121.977	101.689	111.723	170.88	167.213	146.025	0.274702	0.18747	0.493648	123.403	148.96
Adamts8	37.1826	41.3481	44.0654	49.6546	53.9622	55.0042	63.2049	0.472493	0.1222	0.392889	40.8654	55.4565
Adamts9	1076.11	919.995	786.398	775.854	809.433	1097.88	804.228	-0.0801118	0.526947	0.793045	927.5	871.85
Adamtsl1	161.853	196.403	137.281	114.826	173.878	112.209	193.974	-0.14692	0.483237	0.766572	165.179	148.722
Adamtsl2	10.936	4.13481	8.47411	6.20683	0	4.40034	13.0769	-0.335903	0.673946	NA	7.84832	5.92101
Adamtsl3	89.6756	84.7636	91.5204	139.654	98.9307	68.2052	78.4613	0.0864198	0.718752	0.896506	88.6532	96.3127
Adamtsl4	190.287	130.247	172.872	142.757	125.912	129.81	135.128	-0.300183	0.153549	0.444784	164.469	133.402
Adamtsl5	69.9907	51.6851	44.0654	34.1376	44.9685	48.4037	37.0512	-0.412828	0.216319	0.531836	55.2471	41.1402
Adap1	30.6209	16.5392	42.3706	55.8615	35.9748	28.6022	41.4101	0.422826	0.256176	0.581078	29.8436	40.4621
Adap2	122.484	82.6962	96.6049	136.55	110.922	189.215	87.1792	0.388649	0.0823389	0.315484	100.595	130.967
Adar	1025.8	913.793	867.749	912.404	827.42	827.263	812.946	-0.145975	0.187138	0.49332	935.781	845.008
Adarb1	185.913	181.932	140.67	207.929	155.891	211.216	146.025	0.094177	0.613076	0.842807	169.505	180.265
Adarb2	0	0	0	3.10341	0	4.40034	2.17948	2.69448	0.154333	NA	0	2.42081
Adat1	102.799	93.0332	113.553	108.62	110.922	151.812	117.692	0.254915	0.196001	0.50357	103.128	122.261
Adat2	43.7442	28.9437	37.2861	21.7239	38.9727	30.8024	61.0255	0.0845434	0.817126	0.934775	36.658	38.1311
Adat3	43.7442	28.9437	27.1172	24.8273	23.9832	30.8024	23.9743	-0.354389	0.441104	0.737429	33.2683	25.8968
Adck1	216.534	235.684	216.937	220.342	179.874	226.617	187.435	-0.125454	0.402631	0.710478	223.052	203.567
Adck2	199.036	227.415	245.749	238.963	185.87	250.819	200.512	-0.0272871	0.886485	0.961543	224.067	219.041
Adck3	787.395	810.423	649.117	502.753	419.706	466.436	477.306	-0.670262	1.96537e-06	0.000104663	748.978	466.55
Adck4	150.917	173.662	144.06	139.654	152.893	143.011	117.692	-0.17503	0.319567	0.643734	156.213	138.312
Adck5	144.356	159.19	150.839	142.757	137.903	182.614	148.205	0.0300466	0.866383	0.954669	151.462	152.87
Adcy1	8.74884	18.6066	32.2016	27.9307	11.9916	17.6013	10.8974	-0.222885	0.66002	0.866987	19.8524	17.1053
Adcy10	19.6849	14.4718	15.2534	9.31024	5.9958	17.6013	8.71792	-0.625691	0.233907	0.553618	16.47	10.4063
Adcy2	21.8721	31.0111	30.5068	21.7239	14.9895	33.0025	52.3075	0.189221	0.681581	0.876253	27.7967	30.5059
Adcy3	150.917	136.449	137.281	148.964	170.88	209.016	172.179	0.31124	0.103336	0.357272	141.549	175.26
Adcy4	172.79	167.46	133.891	167.584	206.855	182.614	137.307	0.133016	0.462658	0.751881	158.047	173.59
Adcy5	288.712	299.774	254.223	322.755	263.815	420.232	259.358	0.169437	0.311881	0.63852	280.903	316.54
Adcy6	1148.28	1219.77	1235.53	1359.3	1253.12	1581.92	1584.48	0.270069	0.00189729	0.0253303	1201.19	1444.71
Adcy7	485.56	341.122	335.575	273.1	347.756	433.433	374.871	-0.0951737	0.489822	0.771349	387.419	357.29
Adcy8	2.18721	6.20222	5.08447	0	0	0	4.35896	-1.77906	0.181507	NA	4.4913	1.08974
Adcy9	581.798	752.536	618.61	595.856	620.565	640.249	577.562	-0.0924925	0.418929	0.721313	650.981	608.558
Adcyap1r1	118.109	177.797	177.956	136.55	131.908	206.816	115.512	-0.109862	0.621159	0.846782	157.954	147.697
Add1	1183.28	1358.29	1410.09	1533.09	1495.95	1513.72	1475.51	0.192477	0.0180067	0.122669	1317.22	1504.57
Add2	0	4.13481	3.38965	0	2.9979	6.60051	4.35896	0.905731	0.474835	NA	2.50815	3.48934
Add3	962.372	1021.3	1008.42	760.337	881.383	948.273	972.048	-0.160421	0.107596	0.365734	997.363	890.51
Adgb	13.1233	6.20222	11.8638	18.6205	23.9832	13.201	13.0769	0.694138	0.207659	0.520227	10.3964	17.2204
Adgra1	6.56163	0	3.38965	6.20683	5.9958	6.60051	4.35896	0.850657	0.357894	NA	3.31709	5.79052
Adgra2	559.926	636.761	569.46	571.028	677.525	671.051	658.203	0.131067	0.351271	0.670949	588.716	644.452
Adgra3	179.351	155.055	186.431	127.24	134.906	191.415	200.512	-0.0845039	0.653337	0.86318	173.612	163.518
Adgrb2	45.9314	24.8089	23.7275	31.0341	17.9874	48.4037	37.0512	0.127008	0.770423	0.916072	31.4893	33.6191
Adgrd1	260.278	204.673	267.782	179.998	200.859	206.816	200.512	-0.314136	0.0402811	0.20437	244.244	197.046
Adgre1	334.643	363.863	386.42	251.377	317.777	363.028	350.896	-0.171787	0.190813	0.497131	361.642	320.77
Adgre4	54.6802	24.8089	40.6757	31.0341	26.9811	52.804	23.9743	-0.216368	0.509264	0.783466	40.0549	33.6984
Adgre5	282.15	289.437	298.289	341.376	347.756	411.432	305.127	0.274021	0.0840366	0.319662	289.959	351.423
Adgrf1	214.347	150.921	113.553	117.93	92.9349	112.209	117.692	-0.487382	0.0524373	0.242667	159.607	110.191
Adgrf2	13.1233	2.06741	8.47411	6.20683	5.9958	8.80067	8.71792	-0.0258065	0.97175	NA	7.88826	7.43031
Adgrf3	4.37442	4.13481	25.4223	12.4137	17.9874	19.8015	10.8974	0.560847	0.388384	0.69917	11.3105	15.275
Adgrf4	8.74884	8.26962	6.77929	3.10341	2.9979	0	4.35896	-1.61358	0.0779678	NA	7.93258	2.61507
Adgrf5	1806.63	1773.83	1460.94	2116.53	1996.6	2114.36	1887.43	0.275176	0.00840354	0.0726881	1680.47	2028.73
Adgrg1	940.5	1213.57	1052.48	1412.05	1166.18	1018.68	976.407	0.0902802	0.458298	0.748294	1068.85	1143.33
Adgrg2	139.981	177.797	171.177	111.723	161.887	162.812	132.948	-0.190415	0.347553	0.66832	162.985	142.343
Adgrg3	30.6209	31.0111	37.2861	55.8615	47.9664	48.4037	28.3332	0.424542	0.230735	0.54939	32.9727	45.1412
Adgrg5	43.7442	33.0785	28.812	27.9307	26.9811	33.0025	30.5127	-0.226122	0.525311	0.792887	35.2116	29.6068
Adgrg6	139.981	179.864	201.684	155.171	146.897	158.412	178.717	-0.127497	0.434207	0.732074	173.843	159.799
Adgrg7	4.37442	4.13481	3.38965	0	5.9958	0	0	-1.59456	0.225763	NA	3.96629	1.49895
Adgrl1	422.131	380.403	328.796	381.72	359.748	424.633	401.024	0.0601345	0.72971	0.901825	377.11	391.781
Adgrl2	1511.36	1478.19	1225.36	1300.33	1181.17	1130.89	1115.89	-0.247534	0.0200189	0.13118	1404.97	1182.07
Adgrl3	398.072	483.773	440.654	474.822	464.675	508.239	490.383	0.130961	0.309088	0.635834	440.833	484.53
Adgrl4	428.693	514.784	460.992	493.443	440.691	492.838	499.101	0.0372384	0.794311	0.926328	468.156	481.518
Adgrv1	6.56163	0	3.38965	3.10341	17.9874	6.60051	8.71792	1.46401	0.109571	NA	3.31709	9.10231
Adh1	183.726	229.482	172.872	211.032	164.885	189.215	193.974	-0.0384645	0.830682	0.940838	195.36	189.776
Adh5	815.829	986.152	952.49	803.784	737.483	710.654	769.357	-0.283301	0.00116418	0.0175451	918.157	755.32
Adh6-ps1	0	0	0	0	0	6.60051	2.17948	2.60716	0.150605	NA	0	2.195
Adh7	32.8081	18.6066	16.9482	18.6205	23.9832	15.4012	23.9743	-0.103755	0.808075	0.93142	22.7877	20.4948
Adhfe1	356.515	341.122	350.828	294.824	287.798	299.223	187.435	-0.398793	0.0051056	0.0512788	349.488	267.32
Adi1	181.538	277.032	284.73	232.756	236.834	228.818	207.051	-0.142521	0.411276	0.716302	247.767	226.365
Adig	371.826	349.391	425.401	232.756	227.84	253.019	241.922	-0.677569	2.77552e-06	0.000140969	382.206	238.885
Adipoq	2499.98	3096.97	3126.95	3873.06	2644.15	4723.76	2855.12	0.276823	0.119069	0.387891	2907.97	3524.02
Adipor1	1579.17	2057.07	1910.07	1595.15	1621.86	1537.92	1608.46	-0.212503	0.0153694	0.11056	1848.77	1590.85
Adipor2	2318.44	2644.21	2293.1	2076.18	2029.58	2208.97	1996.4	-0.221189	0.0286944	0.166208	2418.58	2077.78
Adk	1135.16	1308.67	1233.83	1048.95	1070.25	851.465	1067.95	-0.286588	0.00303387	0.0357989	1225.89	1009.65
Adm	41.557	28.9437	40.6757	62.0683	47.9664	77.0059	54.487	0.707787	0.0231347	0.144625	37.0588	60.3819
Adm2	0	2.06741	0	0	0	0	4.35896	0.901739	0.626843	NA	0.689135	1.08974
Adnp	21.8721	14.4718	25.4223	24.8273	2.9979	22.0017	13.0769	-0.39639	0.430378	0.729583	20.5888	15.7259
Adnp2	308.397	370.066	330.49	344.479	353.752	382.829	392.306	0.141019	0.269081	0.594385	336.318	368.342
Ado	395.885	686.379	511.837	524.477	584.591	523.64	568.844	0.0627486	0.641103	0.8591	531.367	550.388
Adora1	63.4291	95.1006	67.7929	86.8956	107.924	92.4071	80.6408	0.273154	0.267326	0.593288	75.4409	91.967
Adora2a	39.3698	33.0785	23.7275	52.758	62.9559	52.804	41.4101	0.719779	0.0329646	0.180188	32.0586	52.482
Adora2b	13.1233	4.13481	16.9482	3.10341	8.9937	4.40034	6.53844	-1.0157	0.145978	0.43314	11.4021	5.75897
Adora3	6.56163	0	3.38965	0	0	2.20017	0	-1.87474	0.28054	NA	3.31709	0.550042
Adpgk	308.397	334.92	254.223	391.03	296.792	341.026	311.666	0.168634	0.200905	0.510555	299.18	335.129
Adprh	129.045	206.741	177.956	164.481	188.868	156.212	183.076	0.0278116	0.866007	0.954569	171.247	173.159
Adprhl1	0	4.13481	8.47411	3.10341	0	11.0008	0	0.394471	0.725507	NA	4.20297	3.52606
Adprhl2	133.42	200.538	210.158	167.584	194.864	209.016	183.076	0.0822011	0.632361	0.853433	181.372	188.635
Adprm	109.36	111.64	111.858	96.2058	146.897	121.009	111.154	0.0973184	0.601728	0.837024	110.953	118.816
Adra1a	83.114	84.7636	72.8774	186.205	131.908	125.41	98.0766	0.74871	0.00696917	0.0640464	80.2517	135.4
Adra1b	0	0	5.08447	3.10341	14.9895	0	0	1.37648	0.325024	NA	1.69482	4.52323
Adra1d	10.936	20.6741	6.77929	15.5171	8.9937	2.20017	19.6153	-0.127539	0.843433	0.946013	12.7965	11.5816
Adra2a	17.4977	26.8763	18.6431	15.5171	20.9853	24.2019	19.6153	-0.0620905	0.897449	0.965651	21.0057	20.0799
Adra2b	2.18721	2.06741	3.38965	6.20683	17.9874	4.40034	4.35896	1.63124	0.0913078	NA	2.54809	8.23838
Adra2c	2.18721	0	0	0	8.9937	0	2.17948	2.04987	0.198483	NA	0.72907	2.7933
Adrb1	59.0547	66.157	45.7602	18.6205	32.9769	41.8032	32.6922	-0.809996	0.0091624	0.0773304	56.9906	31.5232
Adrb2	120.297	90.9658	79.6567	74.4819	101.929	96.8074	100.256	-0.0237716	0.916689	0.972187	96.973	93.3685
Adrb3	207.785	359.729	296.594	173.791	131.908	411.432	316.025	-0.181042	0.501024	0.777832	288.036	258.289
Adrbk1	1415.12	1509.21	1194.85	1356.19	1364.04	1157.29	1083.2	-0.150915	0.241922	0.56281	1373.06	1240.18
Adrbk2	848.637	752.536	676.234	893.783	875.387	864.666	828.203	0.194177	0.0398656	0.203055	759.136	865.51
Adrm1	363.077	483.773	389.809	381.72	464.675	294.823	302.948	-0.200664	0.281174	0.608755	412.22	361.041
Adsl	535.866	614.019	594.883	589.649	620.565	539.041	514.357	-0.0434696	0.664193	0.868617	581.589	565.903
Adss	877.071	1149.48	1196.54	921.714	782.452	886.668	1283.71	-0.131796	0.505962	0.781081	1074.36	968.637
Adssl1	41.557	72.3592	83.0463	27.9307	41.9706	35.2027	39.2306	-0.82826	0.0332281	0.181004	65.6542	36.0837
Adtrp	17.4977	18.6066	10.1689	6.20683	11.9916	4.40034	4.35896	-1.23604	0.0453174	0.220139	15.4244	6.73943
Aebp1	686.784	1244.58	977.913	723.096	704.507	970.274	795.51	-0.274637	0.131057	0.408663	969.758	798.347
Aebp2	807.08	760.805	801.651	1039.64	929.349	840.464	958.971	0.25028	0.0333895	0.181392	789.846	942.107
Aen	192.474	248.089	196.599	195.515	176.876	107.808	100.256	-0.584752	0.00379711	0.0416864	212.388	145.114
Aes	1196.4	1753.16	1418.57	1638.6	1265.11	1172.69	1131.15	-0.15876	0.219018	0.534696	1456.04	1301.89
AF251705	63.4291	76.494	55.9292	27.9307	29.979	46.2035	74.1023	-0.503626	0.0997327	0.349812	65.2841	44.5539
AF357355	0	2.06741	3.38965	0	2.9979	4.40034	0	-0.0451113	0.976062	NA	1.81902	1.84956
AF357359	24.0593	4.13481	11.8638	3.10341	2.9979	17.6013	15.2564	-0.293376	0.634617	0.855345	13.3526	9.73976
AF357399	17.4977	10.337	6.77929	6.20683	11.9916	6.60051	8.71792	-0.412657	0.499279	0.777237	11.538	8.37921
AF357425	2.18721	0	0	0	0	0	2.17948	0.22265	0.91241	NA	0.72907	0.54487
AF357426	0	0	1.69482	0	0	0	0	-0.55475	0.813102	NA	0.564941	0
AF529169	15.3105	10.337	16.9482	37.241	26.9811	37.4029	37.0512	1.2745	0.006172	0.0586929	14.1986	34.669
Afap1	837.701	767.007	881.308	1076.88	959.328	998.877	906.664	0.248086	0.0230988	0.144464	828.672	985.438
Afap1l1	192.474	198.471	194.905	201.722	212.851	187.014	235.384	0.099751	0.547621	0.805362	195.283	209.243
Afap1l2	120.297	132.314	137.281	114.826	149.895	200.215	211.41	0.365863	0.0763223	0.304289	129.964	169.087
Aff1	1185.47	1335.54	1257.56	1557.91	1483.96	1375.11	1390.51	0.202888	0.0137867	0.102695	1259.52	1451.87
Aff2	8.74884	16.5392	8.47411	9.31024	23.9832	6.60051	4.35896	-0.0807697	0.904804	0.969166	11.2541	11.0632
Aff3	150.917	107.505	111.858	148.964	86.9391	134.21	141.666	0.0662186	0.770098	0.916067	123.427	127.945
Aff4	3162.7	3830.9	3660.82	3950.65	3759.37	3628.08	4005.89	0.111784	0.139592	0.423742	3551.47	3835.99
Afg3l1	446.191	444.492	440.654	530.684	539.622	470.836	448.973	0.15749	0.168642	0.467804	443.779	497.529
Afg3l2	594.921	704.985	591.493	716.889	740.481	611.647	455.511	-0.0100939	0.939574	0.979996	630.466	631.132
Afmid	63.4291	41.3481	37.2861	68.2751	35.9748	41.8032	32.6922	-0.0788433	0.791721	0.925068	47.3544	44.6863
Aftph	1881	1964.03	1876.17	1936.53	1810.73	1564.32	1593.2	-0.153096	0.0465617	0.224139	1907.07	1726.2
Aga	183.726	223.28	201.684	170.688	164.885	158.412	148.205	-0.345398	0.0309936	0.173932	202.896	160.547
Agap1	1445.75	1471.99	1235.53	1374.81	1199.16	1328.9	1120.25	-0.137336	0.269179	0.59443	1384.42	1255.78
Agap2	37.1826	33.0785	25.4223	43.4478	38.9727	26.402	17.4358	-0.0443687	0.914538	0.972093	31.8945	31.5646
Agap3	492.122	477.571	472.856	571.028	512.641	523.64	414.101	0.0635745	0.708708	0.890769	480.849	505.353
Agbl2	4.37442	6.20222	3.38965	3.10341	2.9979	6.60051	2.17948	-0.296519	0.756125	NA	4.65543	3.72033
Agbl3	83.114	55.8199	67.7929	49.6546	41.9706	74.8057	39.2306	-0.402408	0.144109	0.430457	68.9089	51.4154
Agbl4	0	0	3.38965	0	0	0	0	-1.30558	0.539781	NA	1.12988	0
Agbl5	295.273	227.415	250.834	304.135	218.847	294.823	305.127	0.132002	0.356019	0.673618	257.841	280.733
Ager	32.8081	14.4718	13.5586	15.5171	20.9853	17.6013	26.1538	0.0524229	0.911627	0.970661	20.2795	20.0644
Agfg1	1113.29	1114.33	1345.69	1424.47	1364.04	1267.3	1562.69	0.236043	0.095561	0.342675	1191.1	1404.62
Agfg2	87.4884	132.314	74.5722	124.137	101.929	85.8066	80.6408	-0.0064834	0.981451	0.994577	98.1248	98.1281
Aggf1	457.127	618.154	576.24	623.786	635.555	574.244	581.921	0.139449	0.192805	0.500464	550.507	603.877
Agk	83.114	107.505	93.2153	105.516	116.918	101.208	124.23	0.242494	0.209072	0.522059	94.6114	111.968
Agl	691.158	789.749	823.684	626.89	650.544	486.237	597.178	-0.392454	0.00645477	0.0605273	768.197	590.212
Agmat	4.37442	0	0	3.10341	0	2.20017	0	0.698972	0.692387	NA	1.45814	1.3259
Agmo	137.794	144.718	122.027	133.447	155.891	143.011	178.717	0.184597	0.340918	0.663176	134.847	152.766
Ago1	831.14	870.378	840.632	931.024	950.334	932.872	876.151	0.121096	0.14757	0.435778	847.383	922.595
Ago2	857.386	626.424	730.469	816.198	755.471	774.459	710.511	0.0555739	0.655975	0.864618	738.093	764.16
Ago3	697.72	473.436	469.466	487.236	425.702	446.634	409.742	-0.282177	0.010726	0.0860489	546.874	442.329
Ago4	288.712	233.617	267.782	207.929	215.849	308.024	281.153	-0.0411405	0.792401	0.925084	263.37	253.239
Agpat1	662.724	853.838	649.117	667.234	539.622	558.843	446.793	-0.386506	0.0104699	0.0845333	721.893	553.123
Agpat2	483.373	578.873	581.324	310.341	407.714	349.827	479.486	-0.504672	0.033223	0.181004	547.857	386.842
Agpat3	573.049	870.378	842.327	903.094	776.456	954.873	884.869	0.230997	0.0248068	0.151042	761.918	879.823
Agpat4	74.3651	53.7525	57.624	65.1717	47.9664	37.4029	47.9486	-0.332045	0.237765	0.557571	61.9139	49.6224
Agpat5	220.908	320.448	322.016	276.204	290.796	266.22	346.537	0.0372969	0.802013	0.929348	287.791	294.939
Agpat6	4024.47	4409.78	3386.26	2693.76	2593.18	2116.56	2427.94	-0.681596	3.80381e-21	7.75543e-18	3940.17	2457.86
Agpat9	190.287	169.527	155.924	170.688	113.92	145.211	152.564	-0.23839	0.345764	0.667216	171.913	145.596
Agps	1920.37	1866.87	1971.08	2234.46	2278.4	1898.75	2090.12	0.139101	0.0868199	0.325906	1919.44	2125.43
Agr2	4.37442	4.13481	5.08447	3.10341	0	4.40034	0	-1.25183	0.264505	NA	4.53123	1.87594
Agrn	2095.35	1784.17	1791.43	1955.15	1825.72	2098.96	1551.79	-0.022505	0.865721	0.954569	1890.32	1857.91
Agrp	4.37442	4.13481	3.38965	3.10341	2.9979	6.60051	2.17948	-0.107557	0.91717	NA	3.96629	3.72033
Agt	139.981	221.212	220.327	130.343	119.916	255.22	159.102	-0.167265	0.456363	0.747928	193.84	166.145
Agtpbp1	524.93	500.312	488.109	620.683	506.645	578.644	505.639	0.13044	0.207904	0.520227	504.45	552.903
Agtr1a	94.05	86.831	116.943	220.342	131.908	242.019	211.41	1.01866	7.20357e-06	0.000305072	99.2746	201.42
Agtr2	4.37442	6.20222	1.69482	3.10341	0	0	10.8974	-0.208105	0.8538	NA	4.09049	3.5002
Agtrap	201.223	266.695	230.496	226.549	212.851	220.017	209.23	-0.105901	0.498683	0.777071	232.805	217.162
Agxt2	6.56163	4.13481	3.38965	6.20683	2.9979	4.40034	2.17948	-0.242965	0.801629	NA	4.69536	3.94614
Ahctf1	1644.78	1930.96	1767.7	1843.43	1807.73	1705.13	1889.61	0.0250294	0.752467	0.910489	1781.15	1811.48
Ahcy	164.041	167.46	242.36	183.101	164.885	198.015	176.538	-0.0863755	0.594492	0.832499	191.287	180.635
Ahcyl1	1251.08	1290.06	1488.05	1430.67	1433	1357.5	1427.56	0.0693739	0.469179	0.757994	1343.07	1412.18
Ahcyl2	1618.53	2137.7	1376.2	1520.67	1322.07	1408.11	1144.23	-0.338828	0.0116647	0.0914996	1710.81	1348.77
Ahdc1	529.305	471.368	474.55	623.786	572.599	569.844	416.281	0.144796	0.394533	0.703671	491.741	545.627
Ahi1	67.8035	68.2244	54.2343	46.5512	50.9643	79.2061	84.9997	0.0730385	0.776171	0.91863	63.4207	65.4303
Ahnak	19378.7	19700.3	19636.2	22394.2	21812.7	22608.9	21958.3	0.182351	0.058606	0.259926	19571.7	22193.5
Ahr	406.821	467.234	608.441	698.268	743.479	787.66	847.818	0.653121	7.29908e-07	4.6094e-05	494.165	769.306
Ahrr	4.37442	4.13481	1.69482	3.10341	8.9937	2.20017	8.71792	0.788742	0.377532	NA	3.40135	5.7538
Ahsa1	748.026	977.883	827.074	803.784	890.376	781.06	819.485	-0.0456856	0.643249	0.859183	850.994	823.676
Ahsa2	236.219	217.078	223.717	257.583	254.822	220.017	209.23	0.0481559	0.724074	0.899477	225.671	235.413
AI118078	4.37442	4.13481	1.69482	3.10341	0	2.20017	2.17948	-0.881268	0.509871	NA	3.40135	1.87077
AI182371	6.56163	6.20222	5.08447	6.20683	11.9916	6.60051	8.71792	0.493312	0.524414	NA	5.94944	8.37921
AI197445	4.37442	2.06741	3.38965	6.20683	2.9979	2.20017	13.0769	1.01563	0.279287	NA	3.27716	6.12045
AI314180	2285.63	2290.69	2301.57	2470.32	2341.36	2206.77	2427.94	0.0398745	0.612918	0.842807	2292.63	2361.6
AI317395	0	2.06741	1.69482	3.10341	2.9979	0	0	-0.0100309	0.994916	NA	1.25408	1.52533
AI413582	54.6802	49.6177	55.9292	27.9307	32.9769	41.8032	28.3332	-0.69238	0.033036	0.180371	53.409	32.761
AI414108	26.2465	24.8089	25.4223	27.9307	26.9811	19.8015	43.5896	0.213744	0.594954	0.832877	25.4926	29.5757
AI427809	0	4.13481	3.38965	0	5.9958	11.0008	2.17948	0.952012	0.347845	NA	2.50815	4.79403
AI429214	34.9953	33.0785	54.2343	40.3444	77.9454	48.4037	37.0512	0.283845	0.380419	0.694057	40.7694	50.9362
AI450353	21.8721	10.337	6.77929	9.31024	23.9832	6.60051	21.7948	0.391391	0.518766	0.788312	12.9961	15.4222
AI463170	76.5523	82.6962	83.0463	65.1717	89.937	81.4062	89.3587	0.039339	0.870552	0.955952	80.765	81.4684
AI464131	150.917	183.999	186.431	257.583	182.872	184.814	198.333	0.243449	0.138296	0.421924	173.782	205.901
AI467606	34.9953	14.4718	42.3706	24.8273	26.9811	30.8024	23.9743	-0.219841	0.560208	0.811622	30.6126	26.6463
AI504432	24.0593	8.26962	18.6431	15.5171	17.9874	22.0017	21.7948	0.210403	0.657443	0.865672	16.9907	19.3252
AI506816	43.7442	51.6851	79.6567	62.0683	71.9496	46.2035	58.846	0.0111348	0.96583	0.989845	58.362	59.7669
AI507597	4.37442	2.06741	5.08447	6.20683	2.9979	6.60051	0	-0.0138103	0.989488	NA	3.8421	3.95131
AI597479	310.584	322.515	367.777	341.376	410.712	347.627	359.614	0.119863	0.308766	0.635614	333.625	364.832
AI606473	6.56163	10.337	3.38965	12.4137	8.9937	15.4012	17.4358	1.06906	0.0993438	0.349762	6.76277	13.5611
AI607873	214.347	215.01	201.684	291.721	248.826	255.22	209.23	0.250116	0.155873	0.448351	210.347	251.249
AI661453	212.159	206.741	164.398	179.998	143.899	143.011	128.589	-0.386076	0.0728128	0.296317	194.433	148.874
AI662270	52.493	41.3481	23.7275	52.758	44.9685	59.4046	37.0512	0.340651	0.313958	0.639991	39.1895	48.5456
AI837181	100.612	165.392	172.872	161.378	146.897	96.8074	148.205	-0.0741449	0.702923	0.886887	146.292	138.322
AI839979	6.56163	4.13481	8.47411	9.31024	14.9895	8.80067	6.53844	0.579512	0.417082	NA	6.39018	9.90972
AI846148	269.027	239.819	222.022	223.446	209.853	193.615	191.794	-0.254915	0.121667	0.391796	243.623	204.677
AI854703	4.37442	6.20222	3.38965	0	0	8.80067	0	-0.969029	0.404945	NA	4.65543	2.20017
AI987944	190.287	177.797	161.008	176.895	218.847	167.213	150.384	0.00644124	0.969138	0.990453	176.364	178.335
Aida	277.776	266.695	298.289	288.618	302.788	290.422	281.153	0.0402446	0.74398	0.908053	280.92	290.745
Aif1	63.4291	74.4266	81.3515	93.1024	77.9454	74.8057	84.9997	0.16307	0.455944	0.747786	73.0691	82.7133
Aif1l	41.557	33.0785	57.624	27.9307	56.9601	63.8049	34.8717	0.0289376	0.926032	0.974081	44.0865	45.8919
Aifm1	459.314	568.536	498.278	499.65	491.656	411.432	470.768	-0.123089	0.349775	0.669987	508.709	468.376
Aifm2	345.579	339.054	342.354	347.582	266.813	387.23	324.743	-0.0445732	0.738099	0.905702	342.329	331.592
Aifm3	34.9953	33.0785	27.1172	27.9307	8.9937	37.4029	19.6153	-0.381255	0.342856	0.665204	31.7303	23.4857
Aig1	124.671	136.449	154.229	127.24	134.906	88.0067	165.641	-0.108619	0.56724	0.816299	138.45	128.948
Aim1	1288.27	1277.66	1640.59	1713.08	1789.75	1762.34	1998.58	0.376749	0.000286805	0.00610119	1402.17	1815.94
Aim1l	19.6849	24.8089	20.3379	34.1376	32.9769	24.2019	21.7948	0.38989	0.341198	0.663431	21.6105	28.2778
Aim2	26.2465	45.4829	42.3706	37.241	68.9517	50.6039	50.128	0.451678	0.15487	0.446977	38.0333	51.7312
Aimp1	583.985	682.244	667.76	552.408	554.612	462.035	584.101	-0.262681	0.00969975	0.0802987	644.663	538.289
Aimp2	216.534	258.426	269.477	195.515	215.849	171.613	180.897	-0.384296	0.0104719	0.0845333	248.145	190.968
Aip	223.095	198.471	193.21	183.101	167.882	167.213	135.128	-0.332216	0.088095	0.328103	204.925	163.331
Aipl1	0	0	3.38965	0	8.9937	4.40034	2.17948	1.82042	0.187367	NA	1.12988	3.89338
Aire	4.37442	2.06741	3.38965	3.10341	2.9979	11.0008	2.17948	0.566653	0.605049	NA	3.27716	4.82041
Airn	323.707	97.168	110.163	148.964	125.912	132.01	87.1792	-0.341509	0.181342	0.486213	177.013	123.516
Ajuba	244.967	283.235	301.678	260.687	302.788	400.431	339.999	0.252404	0.0628466	0.271194	276.627	325.976
AK010878	63.4291	62.0222	62.7084	55.8615	62.9559	57.2044	61.0255	-0.076189	0.760576	0.912663	62.7199	59.2618
Ak1	50.3058	181.932	228.801	46.5512	47.9664	68.2052	56.6665	-1.33515	0.000454201	0.00852941	153.68	54.8473
Ak2	990.806	1176.35	1064.35	989.989	980.313	1027.48	991.664	-0.105407	0.291856	0.620421	1077.17	997.361
Ak3	1305.76	1600.17	1589.74	1523.78	1621.86	1403.71	1514.74	0.0167672	0.854942	0.950841	1498.56	1516.02
Ak4	45.9314	62.0222	72.8774	31.0341	56.9601	77.0059	50.128	-0.157881	0.574016	0.820392	60.277	53.7821
Ak5	19.6849	10.337	13.5586	21.7239	14.9895	19.8015	19.6153	0.401897	0.407479	0.713894	14.5268	19.0326
Ak6	135.607	113.707	177.956	105.516	113.92	112.209	128.589	-0.310828	0.11073	0.372325	142.424	115.059
Ak7	4.37442	4.13481	3.38965	3.10341	8.9937	0	4.35896	-0.0245915	0.979656	NA	3.96629	4.11402
Ak8	0	6.20222	1.69482	0	0	4.40034	0	-1.10542	0.439649	NA	2.63235	1.10008
Akap1	1758.52	1935.09	1623.64	1514.47	1427	1408.11	1353.46	-0.310006	0.000373157	0.00734578	1772.42	1425.76
Akap10	601.483	580.941	581.324	605.166	593.584	574.244	577.562	-0.00388221	0.968104	0.990346	587.916	587.639
Akap11	1386.69	1374.82	1179.6	1315.85	1370.04	1232.09	1200.89	-0.0378244	0.72697	0.901026	1313.7	1279.72
Akap12	621.167	597.48	560.986	1011.71	851.404	932.872	778.075	0.593839	1.02628e-05	0.000417295	593.211	893.516
Akap13	1367.01	1145.34	1138.92	1393.43	1343.06	1390.51	1362.18	0.177912	0.0444512	0.217337	1217.09	1372.29
Akap14	6.56163	6.20222	1.69482	3.10341	8.9937	2.20017	6.53844	0.18779	0.837987	NA	4.81956	5.20893
Akap17b	314.958	297.706	267.782	282.411	290.796	222.217	268.076	-0.1477	0.255204	0.579953	293.482	265.875
Akap2	4.37442	0	1.69482	0	0	0	0	-1.79348	0.334099	NA	2.02308	0
Akap5	30.6209	26.8763	25.4223	21.7239	5.9958	22.0017	34.8717	-0.362339	0.422909	0.724191	27.6398	21.1483
Akap6	21.8721	28.9437	32.2016	18.6205	23.9832	22.0017	21.7948	-0.369525	0.356171	0.673816	27.6725	21.6
Akap7	168.415	204.673	198.294	155.171	194.864	189.215	200.512	-0.0480812	0.791554	0.925068	190.461	184.94
Akap8	1358.26	1199.1	1054.18	1461.71	1352.05	1289.3	1237.94	0.150175	0.153025	0.444078	1203.84	1335.25
Akap8l	529.305	442.425	415.232	524.477	479.664	578.644	518.716	0.192139	0.143299	0.429718	462.32	525.375
Akap9	2937.42	2881.96	2787.98	3435.48	3288.7	2921.82	2896.53	0.123851	0.120531	0.390443	2869.12	3135.63
Akip1	69.9907	117.842	89.8256	133.447	140.901	94.6073	117.692	0.397103	0.0786775	0.308724	92.5528	121.662
Akirin1	339.017	442.425	394.894	332.065	332.767	272.821	374.871	-0.260839	0.0974146	0.346104	392.112	328.131
Akirin2	323.707	353.526	394.894	325.859	236.834	360.828	254.999	-0.280274	0.0621665	0.269924	357.376	294.63
Akna	229.657	165.392	161.008	291.721	188.868	206.816	150.384	0.177242	0.429515	0.729506	185.353	209.447
Aknad1	2.18721	2.06741	5.08447	0	0	4.40034	2.17948	-0.842828	0.49579	NA	3.11303	1.64495
Akr1a1	2694.64	2933.65	3021.87	2780.66	2764.06	2719.41	2794.09	-0.0605801	0.304729	0.631861	2883.39	2764.56
Akr1b10	242.78	285.302	306.763	304.135	266.813	250.819	318.204	0.0281673	0.836499	0.942642	278.282	284.993
Akr1b8	63.4291	43.4155	79.6567	74.4819	89.937	70.4054	102.436	0.427881	0.10296	0.356317	62.1671	84.315
Akr1c12	0	2.06741	3.38965	0	0	2.20017	2.17948	-0.658023	0.640024	NA	1.81902	1.09491
Akr1c13	30.6209	8.26962	25.4223	9.31024	20.9853	8.80067	19.6153	-0.545521	0.2375	0.557134	21.4376	14.6779
Akr1c14	168.415	136.449	186.431	80.6888	77.9454	72.6056	91.5382	-1.02644	4.82733e-07	3.31229e-05	163.765	80.6945
Akr1c18	21.8721	18.6066	45.7602	6.20683	11.9916	6.60051	10.8974	-1.77781	0.0019699	0.0259838	28.7463	8.92408
Akr1c19	0	2.06741	1.69482	0	0	2.20017	0	-0.602224	0.732822	NA	1.25408	0.550042
Akr1c21	8.74884	2.06741	10.1689	3.10341	2.9979	8.80067	2.17948	-0.684901	0.437751	NA	6.99506	4.27037
Akr1cl	19.6849	74.4266	76.267	46.5512	47.9664	277.221	43.5896	0.969649	0.217185	0.532955	56.7928	103.832
Akr1e1	264.652	256.358	249.139	223.446	305.786	206.816	244.102	-0.0737844	0.630777	0.852859	256.717	245.037
Akr7a5	177.164	270.83	237.275	232.756	182.872	182.614	202.692	-0.174605	0.306972	0.633559	228.423	200.233
Akt1	3678.89	4289.87	2860.86	3271	2931.95	2378.38	2081.4	-0.446331	0.0111573	0.0885143	3609.87	2665.68
Akt1s1	354.328	380.403	322.016	344.479	353.752	349.827	268.076	-0.10161	0.514415	0.786787	352.249	329.034
Akt2	597.108	826.962	605.052	608.269	578.595	638.049	555.768	-0.183081	0.246701	0.569322	676.374	595.17
Akt3	395.885	332.852	427.095	353.789	443.689	442.234	468.588	0.14535	0.215333	0.530602	385.277	427.075
Aktip	492.122	479.638	535.564	629.993	551.614	486.237	529.614	0.11841	0.337337	0.659744	502.441	549.364
Alad	312.771	386.605	344.049	608.269	506.645	270.621	281.153	0.23999	0.272312	0.597831	347.808	416.672
Alas1	708.656	762.873	779.619	688.958	821.425	644.649	531.793	-0.169101	0.194066	0.502031	750.382	671.706
Alas2	142.169	223.28	167.787	111.723	83.9412	149.611	89.3587	-0.704192	0.00114773	0.0173521	177.745	108.659
Alb	32.8081	18.6066	28.812	27.9307	65.9538	30.8024	23.9743	0.469039	0.284986	0.613595	26.7423	37.1653
Alcam	476.812	475.503	493.193	449.995	452.683	503.839	562.306	0.0278144	0.801366	0.929214	481.836	492.206
Aldh16a1	352.141	407.279	340.659	372.41	341.761	312.424	307.307	-0.142075	0.396529	0.705446	366.693	333.475
Aldh18a1	2569.97	2832.35	2071.07	1992.39	1897.67	1460.91	1525.64	-0.542742	4.54951e-06	0.000212887	2491.13	1719.15
Aldh1a1	236.219	388.672	354.218	378.617	329.769	466.436	318.204	0.204294	0.269995	0.595022	326.37	373.256
Aldh1a2	2.18721	6.20222	8.47411	9.31024	5.9958	8.80067	17.4358	0.849042	0.241831	NA	5.62118	10.3856
Aldh1a3	389.323	336.987	366.082	148.964	257.819	154.012	193.974	-0.936124	0.00887479	0.075707	364.131	188.692
Aldh1a7	104.986	146.786	167.787	139.654	128.91	138.611	163.461	0.0301029	0.90401	0.968694	139.853	142.659
Aldh1b1	0	16.5392	11.8638	9.31024	5.9958	6.60051	8.71792	-0.0879769	0.902538	0.968221	9.46767	7.65612
Aldh1l1	295.273	458.964	313.542	282.411	236.834	297.023	322.563	-0.323631	0.127027	0.401979	355.926	284.708
Aldh1l2	150.917	88.8984	113.553	145.86	116.918	136.41	135.128	0.191629	0.32923	0.652886	117.79	133.579
Aldh2	1242.33	1635.32	1389.75	1346.88	1295.09	1139.69	1126.79	-0.209771	0.15614	0.448586	1422.47	1227.11
Aldh3a1	0	0	3.38965	0	0	0	2.17948	-0.470228	0.799607	NA	1.12988	0.54487
Aldh3a2	500.871	713.255	662.676	639.303	596.582	554.443	695.254	0.00193797	0.987602	0.996018	625.6	621.396
Aldh3b1	59.0547	39.2807	50.8447	27.9307	56.9601	48.4037	47.9486	-0.122869	0.680777	0.875888	49.7267	45.3108
Aldh3b2	28.4337	53.7525	44.0654	34.1376	23.9832	66.0051	45.7691	0.0768959	0.809918	0.931889	42.0839	42.4737
Aldh4a1	367.451	413.481	303.373	238.963	356.75	231.018	278.973	-0.389671	0.101381	0.353595	361.435	276.426
Aldh5a1	155.292	200.538	210.158	245.17	236.834	222.217	252.82	0.346392	0.0218211	0.138722	188.663	239.26
Aldh6a1	1552.92	1798.64	1511.78	1418.26	1370.04	1287.1	1355.64	-0.260352	0.012946	0.0977598	1621.11	1357.76
Aldh7a1	726.153	862.108	808.431	645.51	752.473	640.249	710.511	-0.21595	0.0438885	0.21562	798.897	687.186
Aldh9a1	988.619	1066.78	969.439	803.784	767.462	798.661	621.152	-0.434471	0.000174751	0.00431495	1008.28	747.765
Aldoa	3263.32	6138.13	6111.53	3460.31	3423.6	3469.67	3617.94	-0.524651	0.000582225	0.0103481	5170.99	3492.88
Aldob	2.18721	0	0	9.31024	2.9979	0	4.35896	2.53256	0.0952778	NA	0.72907	4.16678
Aldoc	3210.82	3216.88	2279.54	1669.64	1579.89	1480.71	1811.15	-0.809405	2.08791e-08	2.19108e-06	2902.41	1635.35
Alg1	177.164	190.201	149.144	176.895	164.885	147.411	156.923	-0.0892297	0.600808	0.836469	172.17	161.528
Alg10b	481.186	620.222	591.493	704.475	608.574	594.046	662.562	0.182645	0.0966607	0.344885	564.3	642.414
Alg11	590.547	688.446	596.578	583.442	536.624	444.434	512.178	-0.2788	0.0127162	0.0967738	625.19	519.17
Alg12	148.73	132.314	154.229	114.826	143.899	96.8074	135.128	-0.254165	0.185791	0.491996	145.091	122.665
Alg13	214.347	144.718	142.365	179.998	149.895	171.613	180.897	0.0534663	0.744801	0.908053	167.143	170.601
Alg14	185.913	260.493	277.951	204.825	248.826	253.019	228.845	-0.0403046	0.796171	0.927027	241.452	233.879
Alg2	310.584	314.246	310.153	282.411	221.845	206.816	222.307	-0.432908	0.00474645	0.0487698	311.661	233.345
Alg3	74.3651	142.651	110.163	102.413	92.9349	116.609	80.6408	-0.139732	0.539462	0.800332	109.06	98.1493
Alg5	531.492	489.975	464.381	459.305	443.689	358.627	418.46	-0.24351	0.0417997	0.209028	495.283	420.021
Alg6	201.223	150.921	201.684	142.757	158.889	180.414	180.897	-0.147705	0.384105	0.695062	184.609	165.739
Alg8	135.607	157.123	135.586	130.343	137.903	173.813	126.41	0.0131446	0.938195	0.97944	142.772	142.118
Alg9	336.83	427.953	391.504	440.685	350.754	411.432	357.435	0.0179649	0.887299	0.961763	385.429	390.076
Alkbh1	378.387	291.504	299.984	363.099	296.792	248.619	281.153	-0.127572	0.365561	0.681492	323.292	297.416
Alkbh2	54.6802	53.7525	74.5722	83.7922	56.9601	28.6022	43.5896	-0.243207	0.491148	0.772253	61.0017	53.236
Alkbh3	273.401	241.886	274.561	260.687	239.832	195.815	183.076	-0.28249	0.0585136	0.259741	263.283	219.853
Alkbh4	59.0547	53.7525	64.4033	65.1717	74.9475	61.6047	39.2306	-0.00159089	0.995289	0.998929	59.0702	60.2386
Alkbh5	1095.79	1323.14	1286.37	1412.05	1307.08	1111.09	1144.23	-0.00083016	0.992532	0.997846	1235.1	1243.61
Alkbh6	98.4244	157.123	108.469	124.137	164.885	156.212	119.871	0.234181	0.266547	0.592636	121.339	141.276
Alkbh7	65.6163	41.3481	49.1499	55.8615	26.9811	35.2027	45.7691	-0.340829	0.286797	0.615791	52.0381	40.9536
Alkbh8	249.342	206.741	276.256	238.963	230.838	215.617	224.486	-0.113256	0.479905	0.764591	244.113	227.476
Alms1	614.606	498.245	542.343	533.787	509.643	499.438	472.947	-0.130068	0.2909	0.619846	551.731	503.954
Alms1-ps2	8.74884	10.337	3.38965	0	0	6.60051	4.35896	-1.17011	0.192451	NA	7.49184	2.73987
Alox12	26.2465	16.5392	47.455	27.9307	29.979	33.0025	43.5896	0.150309	0.687286	0.879218	30.0803	33.6255
Alox12e	48.1186	41.3481	84.7411	83.7922	122.914	169.413	207.051	1.2559	0.0679682	0.283389	58.0693	145.792
Alox15	83.114	74.4266	103.384	80.6888	116.918	72.6056	135.128	0.221298	0.476435	0.762894	86.9749	101.335
Alox5	26.2465	22.7415	23.7275	34.1376	32.9769	44.0034	37.0512	0.616551	0.087658	0.327252	24.2385	37.0423
Alox5ap	83.114	49.6177	76.267	74.4819	59.958	81.4062	82.8203	0.112549	0.647805	0.860765	69.6662	74.6666
Alox8	4.37442	4.13481	3.38965	0	8.9937	4.40034	0	-0.281018	0.778114	NA	3.96629	3.34851
Aloxe3	0	0	0	3.10341	5.9958	0	2.17948	2.89757	0.0713976	NA	0	2.81967
Alpk1	137.794	97.168	69.4877	77.5854	83.9412	105.608	122.051	-0.00873255	0.967724	0.990346	101.483	97.2964
Alpk2	2.18721	12.4044	37.2861	0	0	0	2.17948	-3.88313	0.00613063	NA	17.2926	0.54487
Alpk3	0	53.7525	86.436	3.10341	5.9958	4.40034	2.17948	-2.44123	0.0395141	0.202035	46.7295	3.91976
Alpl	328.081	403.144	384.725	372.41	479.664	433.433	431.537	0.207991	0.115639	0.38144	371.983	429.261
Als2	332.456	363.863	330.49	310.341	362.746	341.026	287.691	-0.0764574	0.523594	0.792023	342.27	325.451
Als2cl	413.383	345.257	286.425	539.994	431.698	486.237	403.204	0.412442	0.0148826	0.108085	348.355	465.283
Als2cr12	10.936	10.337	13.5586	21.7239	26.9811	35.2027	30.5127	1.29987	0.00776816	0.0691623	11.6106	28.6051
Alx4	74.3651	68.2244	89.8256	62.0683	65.9538	123.209	102.436	0.187795	0.412245	0.716302	77.4717	88.4168
Alyref	402.447	489.975	537.259	558.615	554.612	464.236	538.332	0.148766	0.234618	0.554391	476.56	528.948
Alyref2	28.4337	35.1459	27.1172	24.8273	23.9832	24.2019	21.7948	-0.345777	0.354628	0.672477	30.2323	23.7018
Amacr	109.36	88.8984	116.943	99.3093	68.9517	70.4054	91.5382	-0.362056	0.0804764	0.312788	105.067	82.5511
Ambra1	638.665	576.806	652.507	670.337	671.53	677.652	625.511	0.0836338	0.410224	0.715844	622.659	661.257
Amdhd2	277.776	334.92	288.12	263.79	302.788	257.42	281.153	-0.1169	0.512377	0.785898	300.272	276.288
Amelx	17.4977	2.06741	6.77929	6.20683	8.9937	8.80067	2.17948	-0.295073	0.707241	NA	8.78146	6.54517
Amer1	608.044	678.109	676.234	682.751	737.483	754.658	788.972	0.185333	0.0821835	0.315411	654.129	740.966
Amer2	2.18721	4.13481	3.38965	0	0	0	6.53844	-0.885301	0.45711	NA	3.23722	1.63461
Amfr	1200.78	1670.46	1469.41	1315.85	1409.01	1289.3	1506.02	-0.0628318	0.545049	0.803574	1446.88	1380.05
Amh	6.56163	2.06741	1.69482	18.6205	8.9937	6.60051	6.53844	1.54082	0.108903	NA	3.44129	10.1883
Amhr2	0	4.13481	6.77929	6.20683	2.9979	4.40034	4.35896	0.250526	0.806254	NA	3.63803	4.49101
Amica1	28.4337	14.4718	20.3379	12.4137	5.9958	11.0008	19.6153	-0.726876	0.133624	0.412929	21.0811	12.2564
Amigo1	164.041	198.471	216.937	251.377	245.828	204.616	246.281	0.286616	0.0427503	0.212146	193.15	237.025
Amigo2	406.821	620.222	640.643	567.925	692.515	490.638	479.486	0.0103287	0.952956	0.986336	555.895	557.641
Amigo3	181.538	130.247	101.689	89.999	71.9496	70.4054	58.846	-0.893843	0.00130154	0.0192693	137.825	72.8
Ammecr1	614.606	616.087	511.837	574.132	458.679	451.035	444.614	-0.271347	0.0210924	0.135722	580.843	482.115
Ammecr1l	975.495	1035.77	1011.81	1197.92	1028.28	996.676	1035.25	0.072538	0.454319	0.746408	1007.69	1064.53
Amn	4.37442	8.26962	1.69482	0	2.9979	2.20017	2.17948	-1.31726	0.274602	NA	4.77962	1.84439
Amn1	98.4244	80.6288	93.2153	62.0683	107.924	77.0059	98.0766	-0.0688854	0.762313	0.913471	90.7562	86.2688
Amot	618.98	659.502	747.417	716.889	653.542	523.64	688.716	-0.0701661	0.615283	0.843789	675.3	645.697
Amotl1	2974.6	3605.55	3406.59	4022.02	3642.45	4004.31	3711.66	0.211262	0.00938421	0.0784142	3328.92	3845.11
Amotl2	505.245	684.311	637.253	1079.99	878.385	963.674	795.51	0.619689	7.29122e-07	4.6094e-05	608.937	929.389
Ampd1	0	57.8873	88.1308	0	2.9979	0	0	-4.04249	0.0223229	0.140882	48.6727	0.749475
Ampd2	367.451	388.672	354.218	422.064	362.746	345.426	276.794	-0.0796207	0.665062	0.868837	370.114	351.758
Ampd3	137.794	103.37	94.9101	89.999	122.914	138.611	104.615	0.0455754	0.817053	0.934775	112.025	114.035
Amph	17.4977	12.4044	13.5586	6.20683	2.9979	6.60051	8.71792	-1.1989	0.0692857	NA	14.4869	6.13079
Amt	393.698	456.897	576.24	425.168	488.658	420.232	405.383	-0.13012	0.347435	0.668183	475.611	434.86
Amy1	290.899	394.874	398.283	484.133	335.765	596.246	442.435	0.354742	0.0635111	0.272642	361.352	464.644
Amz1	59.0547	57.8873	55.9292	49.6546	47.9664	50.6039	56.6665	-0.162285	0.556343	0.810548	57.6237	51.2229
Amz2	371.826	446.56	449.128	456.202	422.704	490.638	470.768	0.127376	0.223762	0.541056	422.504	460.078
Anapc1	1614.16	1908.22	1940.57	2150.67	1933.65	2054.96	1994.22	0.157302	0.0682643	0.284082	1820.98	2033.37
Anapc10	170.602	171.595	138.975	124.137	113.92	110.008	113.333	-0.473919	0.00899907	0.0763583	160.391	115.35
Anapc11	124.671	171.595	183.041	152.067	146.897	171.613	143.846	-0.0540547	0.751575	0.909876	159.769	153.606
Anapc13	207.785	212.943	247.444	161.378	170.88	173.813	187.435	-0.355693	0.0327281	0.179643	222.724	173.377
Anapc15	312.771	237.752	227.106	263.79	203.857	217.817	217.948	-0.192043	0.18644	0.493112	259.21	225.853
Anapc16	295.273	299.774	289.815	301.031	302.788	257.42	285.512	-0.0473645	0.712225	0.892517	294.954	286.688
Anapc2	527.117	502.379	562.681	707.578	563.605	616.047	562.306	0.201646	0.0762393	0.304289	530.726	612.384
Anapc4	772.085	826.962	847.411	741.716	878.385	715.055	900.125	-0.011441	0.911086	0.970647	815.486	808.82
Anapc5	2119.41	2520.17	2465.97	2523.08	2671.13	2433.39	2526.02	0.101376	0.0877747	0.327252	2368.51	2538.4
Anapc7	317.145	388.672	435.569	425.168	446.687	424.633	368.332	0.128748	0.249889	0.574025	380.462	416.205
Ang	43.7442	26.8763	38.9809	37.241	35.9748	30.8024	32.6922	-0.107964	0.746713	0.908345	36.5338	34.1776
Angel1	109.36	155.055	142.365	189.308	140.901	160.612	139.487	0.222061	0.232273	0.551646	135.594	157.577
Angel2	468.063	448.627	488.109	518.27	548.616	585.245	608.075	0.275947	0.0128724	0.0974616	468.266	565.051
Angpt1	1909.43	1852.4	799.956	872.059	812.431	556.643	599.357	-1.0648	1.18832e-09	1.80423e-07	1520.6	710.123
Angpt2	247.155	183.999	191.515	164.481	230.838	237.618	241.922	0.0829023	0.597244	0.834404	207.556	218.715
Angpt4	2.18721	0	3.38965	0	8.9937	2.20017	2.17948	0.803069	0.54214	NA	1.85895	3.34334
Angptl1	15.3105	16.5392	13.5586	12.4137	14.9895	17.6013	17.4358	0.0461413	0.9299	0.975586	15.1361	15.6101
Angptl2	645.227	907.591	794.872	735.509	716.498	910.87	902.305	0.0546489	0.746207	0.908345	782.563	816.296
Angptl3	30.6209	22.7415	13.5586	21.7239	14.9895	17.6013	39.2306	0.141967	0.747295	0.908345	22.307	23.3863
Angptl4	1395.44	1139.14	1762.62	2485.83	2647.15	4266.13	2674.22	1.07638	0.00199432	0.0261849	1432.4	3018.33
Angptl6	8.74884	6.20222	6.77929	0	5.9958	0	10.8974	-0.732445	0.436741	NA	7.24345	4.2233
Angptl7	39.3698	16.5392	13.5586	15.5171	23.9832	26.402	8.71792	-0.239649	0.627344	0.850905	23.1559	18.6551
Ank	153.105	179.864	157.619	201.722	149.895	178.214	222.307	0.193873	0.311952	0.63852	163.529	188.034
Ank1	10.936	24.8089	45.7602	27.9307	8.9937	19.8015	2.17948	-0.863253	0.129134	0.405412	27.1684	14.7264
Ank2	172.79	190.201	161.008	211.032	170.88	209.016	307.307	0.362853	0.0659041	0.278115	174.666	224.559
Ank3	754.587	835.232	933.847	865.853	953.332	1031.88	950.253	0.179501	0.124695	0.397243	841.222	950.329
Ankdd1b	45.9314	24.8089	30.5068	18.6205	11.9916	15.4012	10.8974	-1.2445	0.00399142	0.0432212	33.749	14.2277
Ankef1	19.6849	22.7415	22.0327	46.5512	26.9811	37.4029	39.2306	0.803394	0.0344307	0.185292	21.4863	37.5415
Ankfy1	1334.2	1225.97	1428.74	1381.02	1373.04	1322.3	1510.38	0.0699439	0.384618	0.695284	1329.63	1396.68
Ankhd1	2370.93	2176.98	1954.13	2364.8	2302.39	2151.76	1978.97	0.0224783	0.77396	0.917793	2167.35	2199.48
Ankib1	929.564	903.456	921.984	1017.92	917.357	954.873	956.792	0.0654065	0.463121	0.752063	918.335	961.736
Ankk1	2.18721	0	0	0	2.9979	0	0	0.145185	0.938188	NA	0.72907	0.749475
Ankle1	67.8035	28.9437	28.812	55.8615	62.9559	72.6056	80.6408	0.743025	0.0220081	0.139538	41.8531	68.0159
Ankle2	778.647	882.782	959.27	831.715	911.362	873.467	954.612	0.0331372	0.765492	0.914107	873.566	892.789
Ankmy1	4.37442	10.337	3.38965	6.20683	5.9958	0	4.35896	-0.587289	0.529444	NA	6.0337	4.1404
Ankmy2	297.46	386.605	367.777	344.479	362.746	314.624	422.819	0.0446314	0.730836	0.902364	350.614	361.167
Ankra2	157.479	161.258	144.06	148.964	173.878	184.814	163.461	0.129091	0.438721	0.735622	154.266	167.779
Ankrd1	0	2.06741	5.08447	0	0	2.20017	0	-1.32953	0.405154	NA	2.38396	0.550042
Ankrd10	496.497	425.885	423.706	434.478	389.727	446.634	444.614	-0.0579054	0.614371	0.843445	448.696	428.863
Ankrd11	1848.19	1933.02	1623.64	2225.15	2383.33	2307.98	1883.07	0.28727	0.0179881	0.122649	1801.62	2199.88
Ankrd12	708.656	603.682	511.837	661.027	617.567	585.245	618.972	0.0381262	0.722757	0.898849	608.058	620.703
Ankrd13a	1095.79	1290.06	1077.91	1315.85	1187.17	1157.29	1072.3	0.0338547	0.752628	0.910494	1154.59	1183.15
Ankrd13b	142.169	144.718	125.417	198.619	173.878	193.615	193.974	0.471437	0.0187302	0.1262	137.435	190.021
Ankrd13c	446.191	527.188	494.888	477.926	497.651	468.636	442.435	-0.0591725	0.580977	0.823934	489.422	471.662
Ankrd13d	80.9267	99.2355	55.9292	77.5854	74.9475	59.4046	63.2049	-0.192927	0.454753	0.746605	78.6971	68.7856
Ankrd16	251.529	206.741	189.82	288.618	239.832	264.02	198.333	0.198314	0.211067	0.524541	216.03	247.701
Ankrd17	2653.08	2631.81	2513.42	3286.52	3006.89	2622.6	2502.04	0.129195	0.151666	0.442144	2599.44	2854.51
Ankrd2	6.56163	6.20222	22.0327	9.31024	8.9937	4.40034	2.17948	-0.969268	0.189519	NA	11.5988	6.22094
Ankrd22	199.036	223.28	240.665	173.791	251.824	149.611	224.486	-0.156172	0.575157	0.820871	220.994	199.928
Ankrd23	61.2419	90.9658	135.586	65.1717	53.9622	52.804	63.2049	-0.654799	0.253063	0.577689	95.9312	58.7857
Ankrd24	192.474	163.325	145.755	152.067	128.91	206.816	156.923	-0.0358189	0.853584	0.950706	167.185	161.179
Ankrd26	225.283	206.741	181.346	192.412	236.834	184.814	204.871	0.00274134	0.986073	0.995407	204.456	204.733
Ankrd27	487.748	527.188	622	586.545	494.654	594.046	571.024	0.0467463	0.636178	0.85656	545.645	561.567
Ankrd28	730.528	758.738	727.079	738.613	791.446	693.053	758.459	0.00931411	0.929389	0.975415	738.782	745.393
Ankrd29	19.6849	37.2133	25.4223	49.6546	50.9643	46.2035	41.4101	0.75484	0.0368697	0.193671	27.4402	47.0582
Ankrd32	207.785	169.527	230.496	183.101	140.901	165.013	246.281	-0.139145	0.451759	0.744859	202.603	183.824
Ankrd33b	258.091	266.695	213.548	341.376	317.777	226.617	115.512	-0.0167294	0.943998	0.981949	246.111	250.321
Ankrd34a	4.37442	0	1.69482	0	2.9979	4.40034	4.35896	0.567906	0.685421	NA	2.02308	2.9393
Ankrd34b	2.18721	8.26962	1.69482	0	5.9958	0	2.17948	-1.10904	0.380198	NA	4.05055	2.04382
Ankrd35	19.6849	14.4718	22.0327	12.4137	17.9874	22.0017	26.1538	0.0864301	0.85356	0.950706	18.7298	19.6391
Ankrd36	2.18721	0	0	0	0	0	2.17948	0.277226	0.878104	NA	0.72907	0.54487
Ankrd37	37.1826	6.20222	8.47411	15.5171	5.9958	8.80067	13.0769	-0.43382	0.449586	0.743658	17.2863	10.8476
Ankrd39	72.1779	55.8199	69.4877	58.9649	53.9622	61.6047	71.9229	-0.0819967	0.744915	0.908053	65.8285	61.6137
Ankrd40	470.25	585.076	654.202	673.441	626.561	565.443	671.28	0.14941	0.224892	0.542263	569.842	634.181
Ankrd42	96.2372	80.6288	91.5204	80.6888	89.937	81.4062	71.9229	-0.152037	0.480134	0.7647	89.4621	80.9887
Ankrd44	332.456	295.639	316.932	344.479	299.79	343.226	363.973	0.100773	0.405019	0.712315	315.009	337.867
Ankrd45	0	4.13481	0	0	0	0	2.17948	-0.755897	0.684538	NA	1.37827	0.54487
Ankrd46	384.949	351.459	469.466	378.617	380.733	413.632	411.922	-0.0237049	0.846404	0.947814	401.958	396.226
Ankrd49	286.524	301.841	308.458	332.065	347.756	301.423	333.461	0.133411	0.347024	0.667961	298.941	328.676
Ankrd50	255.903	274.965	286.425	347.582	323.773	319.024	329.102	0.270455	0.0318272	0.176884	272.431	329.87
Ankrd52	531.492	591.278	564.376	713.785	623.563	668.851	527.434	0.168384	0.223459	0.540726	562.382	633.409
Ankrd53	10.936	8.26962	6.77929	15.5171	2.9979	6.60051	4.35896	-0.263913	0.707927	NA	8.66165	7.36861
Ankrd54	179.351	215.01	205.074	167.584	182.872	143.011	156.923	-0.301099	0.126223	0.400413	199.812	162.597
Ankrd55	4.37442	2.06741	1.69482	0	0	2.20017	4.35896	-0.534412	0.718092	NA	2.71222	1.63978
Ankrd6	37.1826	43.4155	45.7602	65.1717	62.9559	39.603	65.3844	0.465931	0.11566	0.38144	42.1194	58.2788
Ankrd61	26.2465	14.4718	8.47411	24.8273	14.9895	13.201	19.6153	0.225544	0.651213	0.862082	16.3975	18.1583
Ankrd63	2.18721	0	3.38965	3.10341	2.9979	15.4012	10.8974	2.10726	0.0509664	NA	1.85895	8.09997
Ankrd66	2.18721	0	0	0	0	0	2.17948	0.154809	0.93713	NA	0.72907	0.54487
Ankrd9	48.1186	68.2244	57.624	43.4478	38.9727	39.603	37.0512	-0.544998	0.0753659	0.302253	57.989	39.7687
Anks1	562.113	572.671	484.719	577.235	575.597	605.046	499.101	0.0635004	0.695755	0.883283	539.834	564.245
Anks1b	10.936	2.06741	1.69482	3.10341	5.9958	0	2.17948	-0.800809	0.50544	NA	4.89942	2.81967
Anks3	474.624	376.268	357.608	356.893	416.708	365.228	350.896	-0.107536	0.411878	0.716302	402.833	372.431
Anks6	52.493	43.4155	28.812	18.6205	26.9811	39.603	17.4358	-0.683447	0.0950532	0.341701	41.5735	25.6601
Ankub1	2.18721	0	1.69482	3.10341	0	0	2.17948	-0.0202984	0.990332	NA	1.29401	1.32072
Ankzf1	317.145	198.471	208.463	285.514	323.773	275.021	268.076	0.265374	0.0894422	0.33002	241.36	288.096
Anln	306.209	303.909	399.978	294.824	413.71	334.426	416.281	0.114865	0.426356	0.727082	336.699	364.81
Ano1	8827.58	12243.2	9448.64	9980.58	9881.08	8477.25	9487.28	-0.102556	0.242922	0.564196	10173.1	9456.55
Ano10	568.674	707.053	674.539	785.164	737.483	717.255	586.28	0.116239	0.217999	0.533809	650.089	706.546
Ano2	4.37442	2.06741	1.69482	6.20683	2.9979	2.20017	2.17948	0.326834	0.782501	NA	2.71222	3.39609
Ano3	32.8081	33.0785	15.2534	24.8273	29.979	22.0017	28.3332	-0.0011804	0.997571	0.999503	27.0467	26.2853
Ano4	367.451	235.684	206.768	226.549	254.822	132.01	143.846	-0.522921	0.00155252	0.0218823	269.968	189.307
Ano5	0	49.6177	83.0463	0	0	0	2.17948	-4.12486	0.0295382	0.168657	44.2213	0.54487
Ano6	1100.17	1250.78	1182.99	1651.02	1322.07	1419.11	1691.28	0.370042	0.000177005	0.0043514	1177.98	1520.87
Ano7	4.37442	2.06741	3.38965	3.10341	0	2.20017	2.17948	-0.777746	0.576613	NA	3.27716	1.87077
Ano8	166.228	196.403	162.703	344.479	278.805	261.82	237.563	0.675761	0.000702701	0.0120976	175.111	280.667
Ano9	41.557	57.8873	89.8256	121.033	119.916	187.014	141.666	1.2022	9.86128e-08	8.79626e-06	63.09	142.407
Anp32a	555.551	727.727	757.586	828.612	869.391	778.86	832.562	0.286635	0.0361497	0.191809	680.288	827.356
Anp32b	240.593	241.886	279.646	356.893	353.752	321.225	368.332	0.459612	0.00184934	0.0249704	254.042	350.05
Anp32e	242.78	351.459	371.166	381.72	446.687	363.028	398.845	0.302997	0.0611498	0.267217	321.802	397.57
Anpep	909.879	1476.13	1555.85	1976.87	1534.92	1443.31	1617.17	0.339794	0.0777708	0.307039	1313.95	1643.07
Antxr1	656.163	655.367	738.943	518.27	641.551	712.855	719.229	-0.0884806	0.515432	0.787262	683.491	647.976
Antxr2	358.702	357.661	430.485	378.617	395.723	495.038	448.973	0.161437	0.209523	0.522637	382.283	429.588
Antxrl	102.799	18.6066	16.9482	65.1717	44.9685	46.2035	39.2306	0.357881	0.431948	0.730711	46.1179	48.8936
Anxa1	1310.14	1145.34	1733.8	1194.81	1352.05	1403.71	1867.81	0.0637204	0.692942	0.881982	1396.43	1454.6
Anxa11	161.853	192.269	179.651	167.584	170.88	143.011	152.564	-0.173778	0.280221	0.607246	177.924	158.51
Anxa13	0	0	3.38965	3.10341	0	0	2.17948	0.00377073	0.99823	NA	1.12988	1.32072
Anxa2	1478.55	1474.06	1610.08	1266.19	1438.99	1498.31	1560.51	-0.0772448	0.55774	0.81132	1520.9	1441
Anxa3	430.88	318.38	416.926	192.412	311.782	272.821	420.64	-0.369631	0.0322885	0.178061	388.729	299.413
Anxa4	789.583	1151.54	1232.14	1325.16	1498.95	1155.09	1588.84	0.414596	0.000673988	0.0117537	1057.75	1392.01
Anxa5	1432.62	1658.06	1632.11	1899.29	1975.62	1977.95	2005.12	0.321076	0.0056973	0.0553895	1574.27	1964.49
Anxa6	2047.23	2602.86	2594.77	2302.73	2479.26	2611.6	2770.12	0.076816	0.460273	0.749821	2414.95	2540.93
Anxa7	1093.6	1106.06	1069.43	1008.61	1040.27	888.868	1020	-0.143248	0.164233	0.461678	1089.7	989.437
Anxa8	161.853	66.157	69.4877	136.55	107.924	59.4046	69.7434	-0.00717168	0.982432	0.994892	99.1661	93.4056
Anxa9	56.8674	31.0111	35.5913	27.9307	65.9538	57.2044	56.6665	0.377002	0.234211	0.554154	41.1566	51.9389
Aoah	52.493	43.4155	38.9809	46.5512	29.979	50.6039	47.9486	-0.0172272	0.954283	0.986565	44.9632	43.7707
Aoc1	2.18721	4.13481	13.5586	6.20683	8.9937	2.20017	6.53844	-0.0342059	0.96677	NA	6.62687	5.98478
Aoc2	59.0547	35.1459	52.5395	40.3444	35.9748	57.2044	50.128	-0.0648585	0.83584	0.942324	48.9133	45.9129
Aoc3	866.135	1060.58	1089.77	1576.53	1157.19	1806.34	1429.74	0.568652	9.00743e-05	0.00254562	1005.49	1492.45
Aox1	203.41	157.123	164.398	217.239	194.864	244.219	224.486	0.33884	0.0528679	0.243863	174.977	220.202
Aox2	4.37442	0	0	0	5.9958	2.20017	13.0769	2.09138	0.103055	NA	1.45814	5.31821
Aox3	45.9314	37.2133	32.2016	15.5171	14.9895	17.6013	17.4358	-1.20245	0.00324892	0.0373803	38.4488	16.3859
Aox4	4.37442	8.26962	11.8638	27.9307	14.9895	8.80067	19.6153	1.19082	0.09573	0.343109	8.16927	17.8341
Ap1ar	284.337	359.729	333.88	372.41	383.731	338.826	392.306	0.190901	0.126203	0.400413	325.982	371.818
Ap1b1	1036.74	1242.51	1018.59	1027.23	1007.29	891.068	906.664	-0.200941	0.0767946	0.305099	1099.28	958.064
Ap1g1	2248.45	2104.62	1840.58	1809.29	1633.86	1667.73	1630.25	-0.289052	0.00167925	0.0232909	2064.55	1685.28
Ap1g2	247.155	237.752	215.243	245.17	269.811	272.821	176.538	0.0432755	0.786887	0.923937	233.383	241.085
Ap1m1	419.944	403.144	332.185	322.755	326.771	259.62	265.897	-0.396747	0.00194289	0.0257484	385.091	293.761
Ap1m2	1373.57	1356.22	1327.05	996.196	1016.29	880.067	1009.1	-0.472843	1.08298e-06	6.30868e-05	1352.28	975.413
Ap1s1	306.209	347.324	308.458	316.548	290.796	250.819	316.025	-0.129165	0.316718	0.64182	320.664	293.547
Ap1s2	185.913	152.988	216.937	142.757	191.866	200.215	191.794	-0.0313216	0.878157	0.958993	185.279	181.658
Ap1s3	54.6802	43.4155	59.3188	52.758	32.9769	39.603	52.3075	-0.247725	0.377717	0.692203	52.4715	44.4114
Ap2a1	538.053	576.806	510.142	598.959	542.62	580.845	468.588	0.0139416	0.921034	0.973079	541.667	547.753
Ap2a2	1695.09	1732.49	1394.84	1585.84	1528.93	1456.51	1368.71	-0.112676	0.354087	0.67223	1607.47	1485
Ap2b1	1859.13	1970.24	1901.59	2101.01	2017.59	1907.55	1832.94	0.0355725	0.701614	0.886458	1910.32	1964.77
Ap2m1	686.784	880.715	845.717	788.267	752.473	750.258	719.229	-0.0945238	0.407276	0.713646	804.405	752.557
Ap2s1	562.113	649.165	533.869	391.03	380.733	404.831	368.332	-0.584707	0.00012284	0.00323464	581.716	386.232
Ap3b1	936.126	1079.19	989.777	1064.47	977.315	1058.28	928.459	0.00575168	0.952618	0.986193	1001.7	1007.13
Ap3b2	0	6.20222	0	3.10341	0	0	0	-1.21423	0.455806	NA	2.06741	0.775854
Ap3d1	2279.07	2522.23	2038.87	2616.18	2467.27	2171.57	1974.61	0.0111018	0.917275	0.972287	2280.06	2307.41
Ap3m1	723.966	822.827	728.774	819.301	725.492	583.045	662.562	-0.135536	0.207832	0.520227	758.522	697.6
Ap3m2	98.4244	117.842	122.027	155.171	143.899	154.012	115.512	0.325066	0.0823651	0.315484	112.765	142.149
Ap3s1	413.383	419.683	389.809	341.376	326.771	341.026	394.486	-0.20929	0.0924156	0.336039	407.625	350.915
Ap3s2	273.401	372.133	357.608	372.41	296.792	389.43	390.127	0.130851	0.279954	0.606944	334.381	362.19
Ap4b1	384.949	378.335	316.932	273.1	245.828	286.022	239.743	-0.453185	0.000992708	0.0156725	360.072	261.173
Ap4e1	389.323	314.246	286.425	338.272	350.754	367.428	368.332	0.125021	0.318671	0.643102	329.998	356.197
Ap4m1	212.159	229.482	303.373	254.48	266.813	325.625	296.409	0.218651	0.12236	0.39301	248.338	285.832
Ap4s1	190.287	171.595	199.989	136.55	164.885	129.81	152.564	-0.36801	0.0242884	0.148876	187.29	145.952
Ap5b1	104.986	146.786	144.06	133.447	131.908	167.213	95.8971	0.0267228	0.906	0.96947	131.944	132.116
Ap5m1	325.894	295.639	250.834	291.721	305.786	277.221	305.127	0.0308043	0.801884	0.929348	290.789	294.964
Ap5s1	83.114	105.438	77.9619	71.3785	86.9391	63.8049	98.0766	-0.137179	0.612993	0.842807	88.8378	80.0498
Ap5z1	172.79	200.538	196.599	198.619	179.874	237.618	156.923	0.0374024	0.830159	0.940561	189.976	193.258
Apaf1	358.702	301.841	345.744	341.376	362.746	391.63	405.383	0.167123	0.187846	0.49391	335.429	375.284
Apba1	69.9907	74.4266	50.8447	62.0683	44.9685	70.4054	61.0255	-0.116033	0.665801	0.86914	65.0873	59.6169
Apba3	304.022	384.537	277.951	319.652	335.765	310.224	215.769	-0.129401	0.488741	0.770497	322.17	295.352
Apbb1	59.0547	84.7636	66.0981	62.0683	38.9727	79.2061	80.6408	-0.0870135	0.791824	0.925068	69.9721	65.222
Apbb1ip	87.4884	80.6288	83.0463	77.5854	68.9517	121.009	108.974	0.182204	0.418241	0.720752	83.7212	94.1301
Apbb2	540.241	618.154	545.733	772.75	626.561	796.461	664.742	0.32971	0.00571397	0.0554383	568.043	715.128
Apbb3	185.913	183.999	135.586	242.066	218.847	215.617	150.384	0.291739	0.0963831	0.344419	168.499	206.728
Apc	2265.95	2158.37	2267.67	2575.83	2398.32	2160.57	2260.12	0.0688621	0.420366	0.722392	2230.66	2348.71
Apc2	41.557	39.2807	37.2861	40.3444	29.979	59.4046	47.9486	0.191745	0.602563	0.837613	39.3746	44.4191
Apcdd1	168.415	190.201	172.872	347.582	221.845	332.225	259.358	0.713614	0.000416344	0.00797592	177.163	290.253
Apeh	319.333	345.257	345.744	288.618	350.754	312.424	276.794	-0.134967	0.310856	0.637342	336.778	307.147
Apex1	80.9267	126.112	135.586	127.24	182.872	140.811	111.154	0.316528	0.153626	0.444916	114.208	140.519
Apex2	80.9267	59.9548	72.8774	83.7922	53.9622	68.2052	61.0255	-0.102882	0.675009	0.873952	71.253	66.7463
Aph1a	190.287	283.235	237.275	254.48	272.809	228.818	296.409	0.158664	0.252757	0.577359	236.932	263.129
Aph1b	78.7395	119.91	93.2153	80.6888	101.929	125.41	124.23	0.164425	0.421479	0.723086	97.2881	108.064
Aph1c	43.7442	35.1459	22.0327	34.1376	14.9895	26.402	34.8717	-0.23331	0.524274	0.792548	33.6409	27.6002
Api5	1154.85	1426.51	1274.51	1291.02	1406.02	1150.69	1405.76	0.029665	0.766919	0.914332	1285.29	1313.37
Apip	284.337	283.235	293.204	214.136	167.882	198.015	196.153	-0.563225	0.000115447	0.0030884	286.925	194.047
Apitd1	8.74884	12.4044	35.5913	15.5171	38.9727	22.0017	21.7948	0.40366	0.395846	0.705043	18.9148	24.5716
Aplf	102.799	113.707	127.112	121.033	149.895	145.211	130.769	0.252419	0.197277	0.505642	114.539	136.727
Apln	1463.24	3309.92	2411.73	2541.7	2314.38	1265.1	1412.3	-0.349954	0.0847937	0.321319	2394.96	1883.37
Aplnr	651.788	938.602	713.52	539.994	608.574	897.669	799.869	-0.130703	0.556186	0.810548	767.97	711.526
Aplp1	28.4337	24.8089	25.4223	24.8273	29.979	30.8024	32.6922	0.188427	0.626835	0.850638	26.2216	29.5752
Aplp2	2821.5	4242.32	3855.72	4953.05	4721.69	5408.01	4967.04	0.473161	4.79034e-06	0.000219832	3639.85	5012.45
Apmap	741.464	930.332	786.398	931.024	824.423	792.061	793.331	0.0232193	0.826738	0.938904	819.398	835.21
Apoa1bp	374.013	370.066	449.128	347.582	272.809	308.024	396.665	-0.25822	0.0471949	0.226181	397.735	331.27
Apoa2	2.18721	0	1.69482	0	8.9937	2.20017	0	1.00296	0.485402	NA	1.29401	2.79847
Apob	13.1233	12.4044	10.1689	6.20683	8.9937	11.0008	8.71792	-0.427107	0.548544	0.805765	11.8989	8.72982
Apobec1	227.47	210.875	199.989	245.17	233.836	272.821	213.589	0.178207	0.274628	0.599952	212.778	241.354
Apobec2	6.56163	190.201	188.125	0	14.9895	6.60051	8.71792	-3.42579	0.000177141	0.0043514	128.296	7.57698
Apobec3	1574.79	1397.57	1659.23	1554.81	1600.88	1654.53	1907.05	0.122436	0.267686	0.593288	1543.86	1679.32
Apobec4	0	0	0	3.10341	2.9979	0	0	1.85504	0.300345	NA	0	1.52533
Apobr	290.899	320.448	313.542	502.753	503.647	246.419	220.128	0.170311	0.429033	0.729506	308.296	368.237
Apoc1	301.835	339.054	415.232	449.995	251.824	195.815	322.563	-0.192576	0.557372	0.81122	352.04	305.049
Apoc3	2.18721	2.06741	3.38965	3.10341	2.9979	0	0	-0.990464	0.458143	NA	2.54809	1.52533
Apod	214.347	349.391	301.678	282.411	293.794	180.414	228.845	-0.203192	0.374254	0.689295	288.472	246.366
Apoe	3558.59	5251.21	4392.98	5002.7	4496.85	4673.16	3576.53	0.0255631	0.883473	0.959798	4400.93	4437.31
Apof	17.4977	39.2807	32.2016	15.5171	23.9832	11.0008	37.0512	-0.479122	0.324953	0.648255	29.66	21.8881
Apol10b	131.233	43.4155	66.0981	55.8615	65.9538	59.4046	71.9229	-0.259132	0.3292	0.652886	80.2487	63.2857
Apol11b	0	8.26962	3.38965	0	0	0	0	-2.88755	0.0430239	NA	3.88642	0
Apol6	791.77	243.954	220.327	592.752	533.626	455.435	427.178	0.458955	0.0635172	0.272642	418.684	502.248
Apol7a	192.474	111.64	105.079	124.137	98.9307	63.8049	154.743	-0.277306	0.307418	0.633753	136.398	110.404
Apol7c	4.37442	6.20222	3.38965	3.10341	8.9937	0	4.35896	-0.224683	0.822102	NA	4.65543	4.11402
Apol7e	6.56163	0	0	3.10341	2.9979	2.20017	2.17948	0.446774	0.712744	NA	2.18721	2.62024
Apol9a	30.6209	28.9437	16.9482	31.0341	11.9916	19.8015	15.2564	-0.377688	0.426783	0.727637	25.5043	19.5209
Apol9b	19.6849	14.4718	16.9482	12.4137	29.979	13.201	19.6153	0.130658	0.799803	0.928281	17.035	18.8022
Apold1	69.9907	80.6288	74.5722	96.2058	107.924	81.4062	65.3844	0.201073	0.458407	0.748386	75.0639	87.7302
Apom	4.37442	8.26962	8.47411	12.4137	2.9979	11.0008	8.71792	0.321743	0.653508	NA	7.03938	8.78258
Apon	0	0	1.69482	0	0	2.20017	0	0.216734	0.918971	NA	0.564941	0.550042
Apoo	32.8081	24.8089	28.812	27.9307	35.9748	19.8015	13.0769	-0.305491	0.443239	0.739007	28.8097	24.196
Apool	196.849	254.291	305.068	229.653	287.798	206.816	215.769	-0.105432	0.558486	0.811356	252.069	235.009
Apopt1	216.534	190.201	194.905	161.378	173.878	156.212	172.179	-0.270463	0.0742459	0.299874	200.547	165.912
App	3722.63	5718.44	4876.01	5297.53	5198.36	5597.23	5287.42	0.174318	0.118634	0.387041	4772.36	5345.13
Appbp2	485.56	527.188	581.324	515.167	461.677	466.436	514.357	-0.124345	0.26162	0.587544	531.358	489.409
Appbp2os	24.0593	10.337	3.38965	21.7239	11.9916	11.0008	13.0769	0.231619	0.701461	0.886344	12.5953	14.4483
Appl1	590.547	560.267	732.163	595.856	587.588	686.453	721.408	0.0424675	0.728714	0.901407	627.659	647.826
Appl2	1218.28	1188.76	1218.58	1241.37	1172.18	1267.3	1229.23	0.0241328	0.77297	0.917639	1208.54	1227.52
Aprt	212.159	303.909	230.496	192.412	200.859	204.616	211.41	-0.28657	0.1146	0.38015	248.855	202.324
Aptx	236.219	181.932	216.937	204.825	197.861	204.616	198.333	-0.0723477	0.612434	0.842635	211.696	201.409
Aqp1	2047.23	3161.06	2076.16	3174.79	2970.92	2963.63	2345.12	0.241633	0.0976258	0.346424	2428.15	2863.62
Aqp11	10.936	10.337	11.8638	12.4137	8.9937	26.402	6.53844	0.316443	0.570302	0.818353	11.0456	13.587
Aqp2	4.37442	2.06741	0	0	0	0	2.17948	-1.23651	0.462232	NA	2.14727	0.54487
Aqp3	384.949	585.076	316.932	341.376	329.769	292.622	165.641	-0.552835	0.145019	0.431679	428.985	282.352
Aqp4	0	20.6741	16.9482	0	0	0	0	-4.19539	0.00169689	NA	12.5408	0
Aqp5	142.169	237.752	196.599	99.3093	143.899	121.009	161.282	-0.529839	0.0433668	0.214015	192.173	131.375
Aqp7	155.292	173.662	186.431	220.342	173.878	321.225	250.64	0.488823	0.0136199	0.101612	171.795	241.521
Aqp9	30.6209	8.26962	6.77929	12.4137	20.9853	8.80067	2.17948	-0.374291	0.515734	0.787378	15.2233	11.0948
Aqr	857.386	893.119	867.749	980.679	1010.29	974.675	858.715	0.128198	0.161196	0.456377	872.751	956.09
Ar	330.269	396.942	391.504	431.375	335.765	404.831	431.537	0.102373	0.490711	0.772131	372.905	400.877
Araf	798.331	783.547	857.58	788.267	743.479	734.856	793.331	-0.0887182	0.316971	0.64204	813.153	764.983
Arap1	1251.08	1147.41	1135.53	1166.88	1172.18	1346.5	1124.61	0.0295412	0.802781	0.929438	1178.01	1202.54
Arap2	533.679	444.492	460.992	552.408	506.645	400.431	536.152	0.0552409	0.652887	0.862938	479.721	498.909
Arap3	406.821	361.796	311.847	363.099	302.788	431.233	309.486	-0.0269177	0.855027	0.950841	360.155	351.652
Arc	13.1233	10.337	3.38965	3.10341	11.9916	19.8015	6.53844	0.203983	0.774368	0.917958	8.94998	10.3587
Arcn1	3866.99	4393.24	3438.8	3693.06	3459.58	2741.41	3206.02	-0.260759	0.0173738	0.120077	3899.67	3275.02
Areg	8.74884	2.06741	8.47411	40.3444	44.9685	66.0051	65.3844	3.0739	0.000507934	0.00933169	6.43012	54.1756
Arel1	809.267	936.535	828.768	983.782	1001.3	827.263	802.049	0.0663028	0.460263	0.749821	858.19	903.598
Arf1	2736.2	3171.4	2665.96	2727.9	2740.08	2178.17	2406.15	-0.191239	0.0421304	0.210313	2857.85	2513.07
Arf2	321.52	446.56	350.828	415.858	350.754	338.826	381.409	-0.00328092	0.979397	0.9936	372.969	371.712
Arf3	1349.51	1852.4	1540.59	1768.95	1657.84	1518.12	1571.41	0.0461417	0.646264	0.86056	1580.83	1629.08
Arf4	1852.57	1649.79	1547.37	1197.92	1184.17	1051.68	1072.3	-0.582727	3.75636e-07	2.70139e-05	1683.24	1126.52
Arf5	374.013	479.638	422.011	403.444	443.689	409.231	344.358	-0.0873487	0.510868	0.785426	425.221	400.181
Arf6	1544.17	2313.43	1882.95	2339.97	2170.48	1993.35	2183.84	0.191058	0.0894971	0.330052	1913.51	2171.91
Arfgap1	1060.8	839.367	760.975	744.819	752.473	704.054	642.947	-0.312199	0.0240233	0.147721	887.046	711.073
Arfgap2	697.72	721.524	760.975	661.027	704.507	741.457	697.434	-0.0489401	0.664072	0.868617	726.74	701.106
Arfgap3	1964.11	1732.49	1367.72	1191.71	1202.16	930.671	928.459	-0.670339	8.04206e-10	1.33461e-07	1688.11	1063.25
Arfgef1	2528.41	2584.26	2562.57	2268.6	2293.39	2356.38	2371.27	-0.143156	0.150894	0.441122	2558.41	2322.41
Arfgef2	2497.79	2724.84	2279.54	2811.69	2470.27	2202.37	2227.43	-0.0487091	0.557489	0.811306	2500.72	2427.94
Arfgef3	179.351	105.438	161.008	96.2058	65.9538	81.4062	87.1792	-0.842308	0.000997134	0.0157109	148.599	82.6863
Arfip1	623.355	709.12	684.708	695.165	743.479	653.45	723.588	0.0601977	0.575104	0.820871	672.394	703.92
Arfip2	769.898	884.849	681.319	719.992	635.555	662.251	592.819	-0.251473	0.0700228	0.289239	778.689	652.654
Arfrp1	347.766	194.336	271.172	282.411	242.83	310.224	272.435	0.0429274	0.792874	0.925485	271.091	276.975
Arg1	37.1826	24.8089	23.7275	21.7239	32.9769	22.0017	23.9743	-0.176141	0.645722	0.8604	28.573	25.1692
Arg2	426.506	583.008	569.46	322.755	320.775	191.415	268.076	-0.949838	0.00182285	0.0247297	526.325	275.755
Arglu1	839.888	659.502	559.292	822.405	869.391	796.461	714.87	0.233964	0.042419	0.21097	686.227	800.782
Arhgap1	612.419	804.221	708.436	704.475	791.446	734.856	786.792	0.0958173	0.347074	0.667961	708.358	754.392
Arhgap10	597.108	454.829	486.414	505.857	494.654	387.23	466.409	-0.151044	0.200921	0.510555	512.784	463.537
Arhgap11a	332.456	291.504	337.27	344.479	326.771	321.225	379.23	0.0967434	0.450628	0.744112	320.41	342.926
Arhgap12	861.76	723.592	830.463	859.646	821.425	838.264	847.818	0.0641378	0.543301	0.802608	805.272	841.788
Arhgap15	87.4884	49.6177	57.624	62.0683	41.9706	35.2027	50.128	-0.45082	0.0927666	0.336715	64.91	47.3424
Arhgap15os	2.18721	2.06741	0	0	0	2.20017	2.17948	-0.11027	0.950857	NA	1.4182	1.09491
Arhgap17	459.314	299.774	296.594	338.272	269.811	338.826	298.589	-0.146192	0.337684	0.659744	351.894	311.374
Arhgap18	820.203	922.063	889.782	766.543	707.504	895.469	1017.82	-0.0465102	0.724023	0.899477	877.349	846.833
Arhgap19	194.662	165.392	235.58	186.205	209.853	250.819	285.512	0.240242	0.141763	0.427474	198.545	233.097
Arhgap20	113.735	101.303	110.163	117.93	140.901	123.209	130.769	0.236251	0.254296	0.579023	108.4	128.202
Arhgap20os	4.37442	6.20222	1.69482	9.31024	2.9979	2.20017	6.53844	0.368647	0.696596	NA	4.09049	5.26169
Arhgap21	1415.12	1230.11	1411.79	1443.09	1313.08	1443.31	1213.97	-0.000447969	0.996418	0.99916	1352.34	1353.36
Arhgap22	24.0593	24.8089	27.1172	21.7239	35.9748	19.8015	8.71792	-0.281823	0.517342	0.787658	25.3284	21.5545
Arhgap23	229.657	196.403	201.684	319.652	302.788	279.421	252.82	0.458479	0.00239523	0.0300129	209.248	288.67
Arhgap24	120.297	140.584	138.975	124.137	131.908	127.61	130.769	-0.0633703	0.759607	0.912397	133.285	128.606
Arhgap25	118.109	124.044	96.6049	108.62	128.91	129.81	135.128	0.162036	0.422935	0.724191	112.92	125.617
Arhgap26	376.2	374.2	505.057	415.858	446.687	477.437	448.973	0.0963175	0.489777	0.771349	418.486	447.239
Arhgap27	459.314	436.223	377.945	490.339	512.641	459.835	350.896	0.0907812	0.585939	0.827265	424.494	453.428
Arhgap27os3	59.0547	28.9437	32.2016	46.5512	32.9769	24.2019	26.1538	-0.277743	0.482068	0.765985	40.0667	32.4709
Arhgap28	367.451	332.852	349.134	338.272	362.746	367.428	379.23	0.0532495	0.677206	0.874468	349.812	361.919
Arhgap29	1568.23	1585.7	1481.28	1529.98	1444.99	1689.73	1656.41	0.0315327	0.760955	0.912834	1545.07	1580.28
Arhgap30	192.474	155.055	127.112	167.584	161.887	151.812	137.307	-0.0286611	0.871245	0.956204	158.214	154.647
Arhgap31	605.857	624.356	594.883	760.337	686.519	781.06	645.126	0.237796	0.0487802	0.231678	608.365	718.26
Arhgap32	859.573	628.491	593.188	856.542	629.559	583.045	697.434	0.0110105	0.933589	0.97743	693.751	691.645
Arhgap33	28.4337	37.2133	47.455	34.1376	59.958	33.0025	50.128	0.225851	0.498393	0.77696	37.7007	44.3065
Arhgap35	1528.86	1676.67	1547.37	1843.43	1774.76	1687.53	1549.61	0.109373	0.219722	0.535454	1584.3	1713.83
Arhgap39	157.479	140.584	150.839	176.895	188.868	171.613	146.025	0.183724	0.332747	0.655844	149.634	170.85
Arhgap4	96.2372	62.0222	66.0981	49.6546	47.9664	68.2052	69.7434	-0.317044	0.243305	0.564625	74.7858	58.8924
Arhgap40	2.18721	8.26962	5.08447	3.10341	5.9958	8.80067	10.8974	0.509339	0.526311	NA	5.18043	7.19932
Arhgap42	857.386	804.221	832.158	707.578	746.477	783.26	882.69	-0.0925754	0.500597	0.777832	831.255	780.001
Arhgap44	164.041	159.19	159.313	214.136	200.859	206.816	174.358	0.307569	0.0660843	0.27871	160.848	199.042
Arhgap5	2777.76	2714.5	2823.57	2696.87	2542.22	2305.78	2728.71	-0.114825	0.19692	0.505202	2771.94	2568.39
Arhgap6	124.671	113.707	118.638	142.757	152.893	149.611	143.846	0.305399	0.0981635	0.347067	119.005	147.277
Arhgap8	135.607	152.988	189.82	183.101	218.847	235.418	233.204	0.469522	0.0361305	0.191809	159.472	217.643
Arhgap9	242.78	210.875	149.144	198.619	167.882	116.609	119.871	-0.428348	0.02126	0.136532	200.933	150.745
Arhgdia	1353.88	1604.31	1411.79	1762.74	1441.99	1480.71	1266.28	0.027671	0.836502	0.942642	1456.66	1487.93
Arhgdib	148.73	138.516	140.67	130.343	140.901	147.411	202.692	0.135825	0.443829	0.739308	142.639	155.337
Arhgdig	21.8721	37.2133	33.8965	40.3444	44.9685	26.402	26.1538	0.148981	0.680611	0.875888	30.9939	34.4672
Arhgef1	581.798	514.784	544.038	679.648	584.591	613.847	516.537	0.126046	0.397691	0.705939	546.873	598.656
Arhgef10	404.634	382.47	425.401	481.029	509.643	525.84	424.999	0.261579	0.0476995	0.227529	404.168	485.378
Arhgef10l	693.345	779.412	784.703	931.024	1001.3	745.857	764.998	0.184211	0.154377	0.446349	752.487	860.794
Arhgef11	756.774	663.637	633.864	822.405	734.486	717.255	638.588	0.0879768	0.472103	0.760042	684.758	728.183
Arhgef12	2734.01	3070.1	2903.23	3689.96	3453.58	3465.27	3439.22	0.274466	0.000231139	0.00524455	2902.45	3512.01
Arhgef15	242.78	194.336	188.125	217.239	164.885	217.817	235.384	0.0163499	0.9292	0.975415	208.414	208.831
Arhgef16	323.707	347.324	259.308	397.237	347.756	310.224	276.794	0.0814553	0.661655	0.867537	310.113	333.003
Arhgef17	643.04	618.154	555.902	698.268	764.465	840.464	586.28	0.255605	0.188402	0.494007	605.699	722.369
Arhgef18	973.308	953.074	972.828	1135.85	1175.18	1020.88	989.484	0.15378	0.105104	0.361456	966.403	1080.35
Arhgef19	122.484	194.336	199.989	155.171	140.901	151.812	130.769	-0.233623	0.26974	0.594788	172.27	144.663
Arhgef2	625.542	560.267	683.014	732.406	731.488	963.674	817.305	0.381398	0.000509619	0.0093487	622.941	811.218
Arhgef25	422.131	374.2	335.575	366.203	338.763	453.235	335.64	-0.00935452	0.950862	0.985019	377.302	373.46
Arhgef26	304.022	194.336	193.21	276.204	218.847	171.613	180.897	-0.117418	0.472257	0.760042	230.523	211.89
Arhgef28	376.2	347.324	542.343	536.891	530.628	677.652	747.562	0.571442	0.000670716	0.0117166	421.956	623.183
Arhgef3	463.688	512.717	494.888	620.683	716.498	591.845	717.049	0.430112	0.00151925	0.021532	490.431	661.519
Arhgef33	4.37442	0	1.69482	0	2.9979	0	0	-1.02682	0.539168	NA	2.02308	0.749475
Arhgef37	65.6163	68.2244	77.9619	71.3785	86.9391	101.208	54.487	0.164354	0.524801	0.792735	70.6008	78.5031
Arhgef38	170.602	97.168	113.553	189.308	134.906	143.011	152.564	0.293562	0.233801	0.553551	127.108	154.947
Arhgef39	21.8721	16.5392	28.812	12.4137	11.9916	30.8024	10.8974	-0.436123	0.336057	0.658546	22.4078	16.5263
Arhgef4	61.2419	37.2133	33.8965	46.5512	53.9622	68.2052	54.487	0.355671	0.256643	0.581399	44.1172	55.8014
Arhgef40	909.879	884.849	952.49	1185.5	1091.24	1038.48	913.202	0.200842	0.180734	0.485039	915.74	1057.11
Arhgef5	1161.41	1132.94	1025.37	1269.3	1172.18	1086.88	1137.69	0.0750706	0.345108	0.667216	1106.57	1166.51
Arhgef6	354.328	413.481	360.997	605.166	599.58	455.435	494.742	0.512193	0.000553949	0.00994461	376.269	538.731
Arhgef7	721.779	653.3	677.929	775.854	689.517	739.257	697.434	0.0833045	0.406292	0.712687	684.336	725.515
Arhgef9	76.5523	59.9548	81.3515	65.1717	89.937	94.6073	87.1792	0.211211	0.364669	0.680779	72.6195	84.2238
Arid1a	1371.38	1234.24	1533.81	1762.74	1522.93	1606.12	1388.33	0.184021	0.164839	0.462743	1379.81	1570.03
Arid1b	1111.1	1343.81	1230.44	1408.95	1349.06	1359.7	1159.48	0.102788	0.35007	0.670073	1228.45	1319.3
Arid2	1395.44	1333.48	1554.15	1651.02	1435.99	1581.92	1466.79	0.100249	0.354564	0.672477	1427.69	1533.93
Arid3a	120.297	198.471	130.501	161.378	137.903	121.009	98.0766	-0.21011	0.257212	0.58207	149.756	129.592
Arid3b	91.8628	78.5614	88.1308	102.413	86.9391	85.8066	82.8203	0.0484102	0.825565	0.938233	86.185	89.4947
Arid4a	743.651	657.435	567.766	645.51	638.553	613.847	695.254	-0.00484645	0.957245	0.987271	656.284	648.291
Arid4b	947.062	709.12	862.665	797.577	884.381	871.267	867.433	0.0305483	0.763715	0.913934	839.615	855.165
Arid5a	509.62	481.705	460.992	443.788	389.727	380.629	339.999	-0.332144	0.0465045	0.224139	484.106	388.536
Arid5b	415.57	339.054	364.387	471.719	491.656	572.044	488.204	0.445208	0.0013094	0.0193655	373.004	505.906
Arih1	1410.75	1496.8	1621.95	1539.29	1430	1606.12	1577.94	0.0281063	0.73909	0.905821	1509.83	1538.34
Arih2	717.405	804.221	625.39	751.026	638.553	666.651	653.844	-0.0746698	0.452004	0.744938	715.672	677.519
Arl1	1314.51	1099.86	1044.01	856.542	887.378	633.649	756.28	-0.561962	2.10067e-07	1.6564e-05	1152.79	783.462
Arl10	59.0547	51.6851	37.2861	46.5512	65.9538	52.804	47.9486	0.120071	0.67839	0.874823	49.342	53.3144
Arl11	6.56163	8.26962	3.38965	3.10341	8.9937	19.8015	10.8974	0.934555	0.157932	0.451253	6.07363	10.699
Arl13a	10.936	0	10.1689	3.10341	5.9958	2.20017	8.71792	-0.474999	0.578037	NA	7.03499	5.00433
Arl13b	275.588	231.549	296.594	269.997	275.807	299.223	296.409	0.0909898	0.518339	0.788083	267.911	285.359
Arl14ep	341.205	365.931	362.692	384.823	419.706	345.426	451.152	0.167186	0.194974	0.502393	356.609	400.277
Arl15	203.41	277.032	261.003	211.032	215.849	290.422	296.409	0.0448524	0.768221	0.914993	247.148	253.428
Arl16	54.6802	62.0222	52.5395	77.5854	71.9496	81.4062	71.9229	0.424812	0.0858372	0.324178	56.414	75.716
Arl2	85.3012	78.5614	103.384	65.1717	83.9412	81.4062	52.3075	-0.343317	0.173195	0.473929	89.0823	70.7067
Arl2bp	209.972	289.437	284.73	288.618	317.777	281.622	300.768	0.18033	0.183625	0.489903	261.38	297.196
Arl3	78.7395	103.37	110.163	99.3093	74.9475	103.408	102.436	-0.0350255	0.877379	0.958993	97.4244	95.0251
Arl4a	1813.2	1389.3	1013.5	813.095	806.435	829.464	908.843	-0.704884	1.77804e-06	9.58005e-05	1405.33	839.459
Arl4c	251.529	347.324	262.698	223.446	341.761	275.021	333.461	0.0273187	0.881085	0.959125	287.184	293.422
Arl4d	43.7442	70.2918	40.6757	40.3444	56.9601	37.4029	37.0512	-0.265902	0.373568	0.68879	51.5706	42.9396
Arl5a	1065.17	1143.28	1189.77	1114.13	1049.27	1071.48	1338.2	0.0125951	0.913898	0.972012	1132.74	1143.27
Arl5b	557.738	587.143	444.044	443.788	383.731	413.632	444.614	-0.314579	0.00510387	0.0512788	529.642	421.441
Arl5c	13.1233	28.9437	16.9482	9.31024	20.9853	13.201	4.35896	-0.767968	0.146268	0.43355	19.6717	11.9639
Arl6	54.6802	55.8199	40.6757	58.9649	23.9832	55.0042	65.3844	0.0417769	0.87832	0.958993	50.392	50.8342
Arl6ip1	748.026	946.872	1005.03	868.956	950.334	1051.68	1224.87	0.191893	0.0895969	0.330115	899.976	1023.96
Arl6ip4	216.534	248.089	223.717	291.721	212.851	228.818	204.871	0.0262331	0.878986	0.958993	229.446	234.565
Arl6ip5	507.433	483.773	501.668	391.03	359.748	382.829	446.793	-0.32857	0.0233483	0.145687	497.624	395.1
Arl6ip6	146.543	159.19	132.196	121.033	131.908	134.21	148.205	-0.110717	0.522668	0.791519	145.976	133.839
Arl8a	170.602	206.741	183.041	263.79	224.843	209.016	152.564	0.169346	0.280171	0.607229	186.795	212.553
Arl8b	1119.85	1445.12	1427.04	1511.36	1394.02	1172.69	1329.48	0.0147612	0.888915	0.962345	1330.67	1351.89
Arl9	2.18721	2.06741	3.38965	0	0	6.60051	2.17948	-0.0167646	0.989879	NA	2.54809	2.195
Armc1	599.295	560.267	571.155	422.064	476.666	466.436	451.152	-0.34278	0.0014857	0.0211827	576.906	454.08
Armc10	384.949	456.897	496.583	527.58	524.633	532.441	673.459	0.349674	0.0327391	0.179643	446.143	564.528
Armc2	21.8721	10.337	8.47411	3.10341	20.9853	11.0008	6.53844	-0.331255	0.605224	NA	13.5611	10.407
Armc3	2.18721	2.06741	0	3.10341	0	2.20017	0	-0.0636427	0.969476	NA	1.4182	1.3259
Armc5	157.479	163.325	135.586	173.791	161.887	156.212	111.154	-0.0224817	0.902596	0.968221	152.13	150.761
Armc6	94.05	121.977	67.7929	65.1717	110.922	66.0051	76.2818	-0.24552	0.335856	0.658546	94.6066	79.5952
Armc7	85.3012	64.0896	74.5722	62.0683	59.958	59.4046	56.6665	-0.329935	0.173152	0.473929	74.6543	59.5243
Armc8	581.798	558.199	581.324	602.062	560.607	506.039	520.896	-0.0780062	0.450306	0.743881	573.774	547.401
Armc9	78.7395	82.6962	59.3188	71.3785	71.9496	88.0067	80.6408	0.102395	0.659884	0.866918	73.5848	77.9939
Armcx1	293.086	233.617	303.373	285.514	281.803	347.627	305.127	0.14368	0.330431	0.653716	276.692	305.018
Armcx2	319.333	365.931	360.997	238.963	263.815	387.23	305.127	-0.239412	0.239421	0.559616	348.754	298.784
Armcx3	247.155	219.145	225.411	226.549	221.845	220.017	209.23	-0.0726369	0.628559	0.851751	230.57	219.41
Armcx4	1006.12	1122.6	1682.96	2113.43	2338.36	2336.58	2262.3	0.85151	3.43072e-07	2.51094e-05	1270.56	2262.67
Armcx5	48.1186	76.494	52.5395	58.9649	74.9475	57.2044	89.3587	0.259683	0.333599	0.656334	59.0507	70.1189
Armcx6	13.1233	28.9437	30.5068	24.8273	35.9748	33.0025	8.71792	0.0305726	0.94414	0.981949	24.1912	25.6306
Armt1	168.415	235.684	206.768	161.378	164.885	202.416	200.512	-0.143737	0.382129	0.694613	203.623	182.297
Arnt	831.14	750.468	750.807	629.993	599.58	618.247	701.793	-0.280466	0.00224827	0.0285728	777.471	637.403
Arnt2	69.9907	49.6177	61.0136	52.758	68.9517	77.0059	89.3587	0.28236	0.296696	0.624213	60.2073	72.0186
Arntl	360.89	409.346	364.387	400.34	380.733	321.225	309.486	-0.114944	0.511108	0.785454	378.208	352.946
Arntl2	172.79	142.651	167.787	207.929	233.836	231.018	202.692	0.441239	0.0122012	0.0942295	161.076	218.869
Arpc1a	1065.17	1029.57	1055.87	881.37	917.357	893.268	974.228	-0.192496	0.0330561	0.180412	1050.2	916.556
Arpc1b	1248.9	1269.39	1189.77	1322.05	1483.96	1144.09	1237.94	0.0632742	0.608835	0.840908	1236.02	1297.01
Arpc2	868.322	1062.65	1018.59	1238.26	1352.05	1075.88	1172.56	0.29504	0.0021494	0.0276612	983.186	1209.69
Arpc3	1124.23	1217.7	1220.27	1154.47	1148.2	943.872	1065.77	-0.144758	0.177454	0.480947	1187.4	1078.08
Arpc4	660.537	783.547	715.215	707.578	746.477	655.65	767.177	0.00128172	0.988443	0.996402	719.766	719.221
Arpc5	2298.76	2398.19	2577.83	2243.77	2233.44	1916.35	2297.17	-0.162322	0.14344	0.429718	2424.92	2172.68
Arpc5l	409.008	487.908	384.725	307.238	422.704	310.224	246.281	-0.420557	0.00433265	0.0458381	427.214	321.612
Arpin	203.41	217.078	210.158	195.515	206.855	206.816	222.307	-0.00804638	0.95713	0.987271	210.215	207.873
Arpp19	605.857	628.491	718.605	639.303	728.49	675.452	741.023	0.0939886	0.370904	0.686737	650.984	696.067
Arr3	0	4.13481	0	0	2.9979	4.40034	4.35896	1.22152	0.378519	NA	1.37827	2.9393
Arrb1	2010.05	2350.64	2320.21	2321.35	2539.22	2935.03	2663.33	0.230512	0.0236201	0.146589	2226.97	2614.73
Arrb2	159.666	161.258	116.943	152.067	146.897	176.013	139.487	0.0833986	0.650556	0.861933	145.956	153.616
Arrdc1	417.757	446.56	444.044	502.753	485.66	479.637	424.999	0.117072	0.353272	0.671894	436.12	473.262
Arrdc2	104.986	88.8984	105.079	152.067	164.885	147.411	117.692	0.537791	0.0149891	0.108701	99.6545	145.514
Arrdc3	990.806	738.064	1118.58	1393.43	1406.02	1535.72	1573.58	0.640197	3.66403e-05	0.00121049	949.151	1477.19
Arrdc4	1027.99	1017.16	1120.28	1458.6	1403.02	1339.9	1327.3	0.384214	8.19063e-05	0.00234732	1055.14	1382.21
Arsa	170.602	217.078	198.294	167.584	203.857	266.22	187.435	0.0869249	0.597565	0.834404	195.325	206.274
Arsb	258.091	231.549	322.016	304.135	257.819	257.42	254.999	-0.0265082	0.864016	0.954147	270.552	268.593
Arsg	100.612	86.831	57.624	71.3785	50.9643	61.6047	61.0255	-0.393415	0.105892	0.36303	81.6889	61.2433
Arsi	30.6209	51.6851	33.8965	37.241	11.9916	26.402	34.8717	-0.471067	0.237569	0.557203	38.7342	27.6266
Arsj	24.0593	20.6741	25.4223	21.7239	14.9895	28.6022	17.4358	-0.181025	0.65625	0.864686	23.3852	20.6879
Arsk	135.607	192.269	144.06	152.067	182.872	165.013	220.128	0.196457	0.282091	0.609816	157.312	180.02
Art1	0	28.9437	23.7275	0	0	0	0	-3.92943	0.0956908	NA	17.5571	0
Art2a-ps	8.74884	2.06741	3.38965	9.31024	2.9979	8.80067	4.35896	0.475174	0.574506	NA	4.7353	6.36694
Art2b	0	4.13481	1.69482	0	2.9979	0	4.35896	0.0470371	0.973349	NA	1.94321	1.83922
Art3	227.47	365.931	294.899	332.065	272.809	429.033	353.076	0.231681	0.210103	0.523336	296.1	346.746
Art4	48.1186	49.6177	54.2343	37.241	56.9601	59.4046	50.128	0.00798627	0.976269	0.992519	50.6569	50.9334
Art5	0	4.13481	6.77929	0	2.9979	6.60051	6.53844	0.403124	0.712242	NA	3.63803	4.03421
Artn	4.37442	0	1.69482	3.10341	0	4.40034	2.17948	0.380461	0.77983	NA	2.02308	2.42081
Arv1	76.5523	62.0222	61.0136	52.758	59.958	63.8049	61.0255	-0.149694	0.55298	0.808546	66.5294	59.3866
Arvcf	225.283	235.684	225.411	242.066	263.815	257.42	252.82	0.151535	0.377773	0.692203	228.793	254.03
Arxes1	13.1233	35.1459	18.6431	18.6205	23.9832	22.0017	10.8974	-0.257936	0.593141	0.831891	22.3041	18.8757
Arxes2	139.981	237.752	199.989	130.343	149.895	167.213	119.871	-0.446207	0.0447863	0.218527	192.574	141.831
As3mt	135.607	159.19	166.093	121.033	158.889	169.413	161.282	-0.00657433	0.969952	0.990736	153.63	152.654
Asah1	1262.02	1013.03	942.322	940.335	1043.27	893.268	926.279	-0.163636	0.113748	0.378593	1072.46	950.788
Asah2	452.752	452.762	422.011	375.513	377.735	488.437	568.844	0.0432641	0.758916	0.911936	442.508	452.633
Asap1	483.373	332.852	289.815	490.339	437.693	497.238	348.717	0.294638	0.0384136	0.198781	368.68	443.497
Asap2	325.894	241.886	296.594	409.651	278.805	360.828	305.127	0.230364	0.134801	0.415256	288.125	338.603
Asap3	124.671	97.168	89.8256	68.2751	101.929	81.4062	115.512	-0.168728	0.520367	0.789284	103.888	91.7806
Asb1	102.799	130.247	101.689	96.2058	122.914	147.411	106.795	0.0847749	0.672525	0.872925	111.578	118.331
Asb10	0	2.06741	6.77929	0	0	2.20017	2.17948	-1.15612	0.429582	NA	2.9489	1.09491
Asb11	0	4.13481	20.3379	0	2.9979	0	2.17948	-1.68101	0.259669	NA	8.15756	1.29435
Asb12	0	0	8.47411	0	2.9979	0	0	-1.38994	0.381666	NA	2.8247	0.749475
Asb13	317.145	289.437	262.698	229.653	248.826	195.815	231.025	-0.356098	0.00930583	0.0780657	289.76	226.33
Asb14	13.1233	14.4718	28.812	3.10341	8.9937	6.60051	4.35896	-1.70698	0.014511	0.106205	18.8024	5.76415
Asb15	6.56163	10.337	8.47411	0	5.9958	2.20017	0	-2.10332	0.0733226	NA	8.45759	2.04899
Asb16	0	6.20222	1.69482	0	2.9979	0	2.17948	-0.970934	0.55309	NA	2.63235	1.29435
Asb2	161.853	134.381	162.703	117.93	104.927	171.613	146.025	-0.174306	0.464539	0.753484	152.979	135.124
Asb3	153.105	171.595	144.06	142.757	191.866	198.015	135.128	0.0954173	0.606095	0.839566	156.253	166.941
Asb4	4.37442	2.06741	5.08447	0	8.9937	8.80067	10.8974	0.994164	0.273192	NA	3.8421	7.17294
Asb5	15.3105	20.6741	33.8965	6.20683	0	2.20017	2.17948	-3.20142	0.000162907	0.00407182	23.2937	2.64662
Asb6	190.287	190.201	167.787	164.481	167.882	114.409	124.23	-0.376824	0.0837183	0.318961	182.759	142.751
Asb7	277.776	330.785	291.51	304.135	323.773	327.825	329.102	0.0996422	0.458822	0.748827	300.023	321.209
Asb8	279.963	328.717	349.134	322.755	290.796	268.421	329.102	-0.0759426	0.551458	0.807304	319.271	302.768
Ascc1	174.977	217.078	223.717	201.722	200.859	193.615	176.538	-0.0920748	0.526225	0.793011	205.257	193.184
Ascc2	249.342	243.954	213.548	232.756	269.811	279.421	278.973	0.179138	0.26051	0.586436	235.614	265.241
Ascc3	1966.3	1684.94	1494.83	1604.47	1510.94	1335.5	1445	-0.213471	0.00459044	0.0476389	1715.36	1473.98
Ascl1	0	0	1.69482	0	0	0	0	-0.549849	0.798567	NA	0.564941	0
Ascl2	2.18721	0	0	3.10341	8.9937	2.20017	4.35896	2.69027	0.0649983	NA	0.72907	4.66406
Ascl3	2.18721	0	0	0	0	0	0	-0.558299	0.780605	NA	0.72907	0
Asf1a	266.84	264.628	249.139	307.238	203.857	319.024	285.512	0.109299	0.468602	0.757342	260.202	278.908
Asf1b	50.3058	53.7525	83.0463	86.8956	62.9559	57.2044	74.1023	0.150176	0.553211	0.808766	62.3682	70.2896
Asgr2	8.74884	10.337	11.8638	9.31024	23.9832	8.80067	6.53844	0.171972	0.775168	NA	10.3165	12.1581
Ash1l	2613.72	2383.72	2550.71	2911	2749.07	2618.2	2519.48	0.0986561	0.243351	0.56464	2516.05	2699.44
Ash2l	564.3	564.402	598.272	577.235	623.563	638.049	632.049	0.105616	0.313957	0.639991	575.658	617.724
Asic1	69.9907	64.0896	47.455	58.9649	62.9559	55.0042	82.8203	0.130631	0.61169	0.842323	60.5118	64.9363
Asic2	2.18721	4.13481	5.08447	0	2.9979	8.80067	2.17948	-0.0479202	0.965036	NA	3.80216	3.49451
Asic3	13.1233	8.26962	10.1689	18.6205	5.9958	17.6013	15.2564	0.478696	0.39064	0.700981	10.5206	14.3685
Asic4	10.936	6.20222	1.69482	3.10341	5.9958	4.40034	0	-0.926513	0.434281	NA	6.2777	3.37489
Asl	358.702	396.942	415.232	375.513	419.706	363.028	318.204	-0.0837566	0.537277	0.799334	390.292	369.113
Asna1	304.022	363.863	350.828	387.927	293.794	286.022	294.23	-0.110766	0.387641	0.698272	339.571	315.493
Asns	647.414	601.615	583.019	732.406	689.517	512.639	599.357	0.0364802	0.730958	0.902364	610.683	633.48
Asnsd1	454.94	568.536	569.46	549.304	452.683	490.638	492.563	-0.0969955	0.455709	0.747786	530.979	496.297
Aspa	54.6802	51.6851	47.455	21.7239	29.979	39.603	65.3844	-0.365569	0.290327	0.61918	51.2735	39.1726
Aspdh	0	2.06741	1.69482	3.10341	2.9979	2.20017	2.17948	1.06416	0.486292	NA	1.25408	2.62024
Aspg	85.3012	68.2244	47.455	62.0683	86.9391	41.8032	52.3075	-0.130742	0.707483	0.889974	66.9935	60.7795
Asph	1012.68	1135.01	1094.86	1216.54	1220.15	1229.89	1279.36	0.187396	0.113611	0.378401	1080.85	1236.48
Asphd1	4.37442	4.13481	0	0	2.9979	0	0	-1.78156	0.25763	NA	2.83641	0.749475
Asphd2	10.936	8.26962	3.38965	3.10341	5.9958	15.4012	4.35896	0.0419264	0.956271	NA	7.53177	7.21484
Aspm	282.15	264.628	432.18	332.065	407.714	539.041	588.46	0.518809	0.00109867	0.0168605	326.319	466.82
Aspn	299.648	314.246	355.913	183.101	221.845	330.025	287.691	-0.355468	0.138741	0.42247	323.269	255.666
Asprv1	13.1233	12.4044	44.0654	49.6546	53.9622	50.6039	50.128	1.2386	0.001433	0.0206017	23.1977	51.0872
Aspscr1	262.465	258.426	257.613	304.135	254.822	244.219	259.358	0.0290767	0.858887	0.952303	259.501	265.633
Asrgl1	126.858	171.595	167.787	229.653	248.826	217.817	305.127	0.699968	7.48638e-05	0.00219723	155.413	250.356
Aste1	172.79	103.37	120.332	105.516	119.916	96.8074	113.333	-0.263421	0.169113	0.468243	132.164	108.893
Astn1	2.18721	8.26962	5.08447	0	0	2.20017	0	-2.70011	0.0398205	NA	5.18043	0.550042
Astn2	21.8721	24.8089	11.8638	27.9307	23.9832	17.6013	21.7948	0.215596	0.63072	0.852859	19.5149	22.8275
Asun	424.319	413.481	401.673	508.96	413.71	426.833	483.845	0.150183	0.154181	0.44589	413.158	458.337
Asxl1	828.952	762.873	860.97	875.163	947.336	902.069	791.151	0.0999887	0.300108	0.627554	817.598	878.93
Asxl2	1108.92	1029.57	1059.26	980.679	1130.21	959.274	967.689	-0.0817379	0.423347	0.724463	1065.92	1009.46
Asxl3	30.6209	18.6066	33.8965	24.8273	32.9769	41.8032	39.2306	0.320832	0.429122	0.729506	27.708	34.7095
Atad1	842.076	1041.97	1006.72	999.299	1133.21	908.67	1113.71	0.10586	0.329876	0.653343	963.591	1038.72
Atad2	422.131	401.077	469.466	456.202	500.649	492.838	553.588	0.21511	0.0466866	0.224427	430.891	500.819
Atad2b	1257.65	1116.4	1210.1	1353.09	1301.09	1240.9	1159.48	0.0753926	0.391861	0.701887	1194.72	1263.64
Atad3a	796.144	994.422	798.262	837.922	878.385	840.464	727.946	-0.0691484	0.567215	0.816299	862.943	821.179
Atad3aos	8.74884	8.26962	15.2534	21.7239	8.9937	8.80067	15.2564	0.322509	0.604873	0.838837	10.7573	13.6937
Atad5	161.853	161.258	186.431	198.619	200.859	261.82	246.281	0.418553	0.00673648	0.0623901	169.847	226.895
Atat1	172.79	126.112	118.638	136.55	143.899	173.813	165.641	0.179588	0.36349	0.679734	139.18	154.976
Atcay	4.37442	4.13481	3.38965	0	0	0	2.17948	-2.33037	0.12223	NA	3.96629	0.54487
Atcayos	0	4.13481	6.77929	3.10341	2.9979	0	0	-1.08624	0.478846	NA	3.63803	1.52533
Ate1	761.149	682.244	721.995	595.856	680.523	673.252	719.229	-0.107357	0.276345	0.601769	721.796	667.215
Atf1	266.84	279.1	271.172	276.204	251.824	294.823	246.281	-0.0263789	0.844005	0.946389	272.37	267.283
Atf2	697.72	798.018	801.651	782.06	785.45	723.855	791.151	0.00376926	0.968236	0.990346	765.796	770.629
Atf3	54.6802	117.842	94.9101	207.929	185.87	79.2061	128.589	0.748787	0.00749695	0.0672111	89.1441	150.398
Atf4	1846	2253.47	1784.65	1703.77	1714.8	1227.69	1410.12	-0.3835	0.00100155	0.0157251	1961.37	1514.1
Atf5	188.1	183.999	206.768	316.548	251.824	266.22	222.307	0.444475	0.017688	0.121718	192.956	264.225
Atf6	1152.66	1432.71	1011.81	1176.19	1043.27	952.673	956.792	-0.219767	0.0745591	0.30068	1199.06	1032.23
Atf6b	352.141	336.987	344.049	369.306	335.765	330.025	270.256	-0.0840102	0.665612	0.869052	344.392	326.338
Atf7	1590.1	1283.86	1542.29	1775.15	1606.87	1632.53	1534.35	0.152655	0.283259	0.6116	1472.08	1637.23
Atf7ip	896.756	866.243	811.82	962.058	971.32	1086.88	989.484	0.226256	0.0367666	0.193332	858.273	1002.44
Atf7ip2	4.37442	4.13481	6.77929	9.31024	2.9979	8.80067	13.0769	0.732865	0.421368	NA	5.09617	8.54643
Atg10	78.7395	105.438	123.722	114.826	86.9391	59.4046	122.051	-0.108884	0.642704	0.859183	102.633	95.8052
Atg101	249.342	256.358	242.36	214.136	197.861	187.014	204.871	-0.307043	0.0448791	0.218693	249.353	200.971
Atg12	343.392	322.515	303.373	297.928	275.807	266.22	359.614	-0.101952	0.426151	0.727082	323.093	299.892
Atg13	483.373	487.908	344.049	437.581	380.733	338.826	396.665	-0.1665	0.231982	0.55144	438.443	388.452
Atg14	129.045	126.112	154.229	167.584	188.868	189.215	141.666	0.322871	0.0615242	0.267866	136.462	171.833
Atg16l1	516.181	469.301	452.518	468.616	416.708	462.035	433.717	-0.102326	0.382593	0.694613	479.333	445.269
Atg16l2	120.297	117.842	113.553	136.55	176.876	147.411	128.589	0.32787	0.0940103	0.339589	117.231	147.357
Atg2a	562.113	624.356	588.104	685.855	602.578	673.252	581.921	0.103948	0.441315	0.737438	591.524	635.901
Atg2b	1482.93	1184.62	1242.31	1412.05	1277.11	1377.31	1194.36	0.0171142	0.850821	0.949566	1303.29	1315.2
[truncated: 15,290 more rows]
